# Supplementary material for: Towards global carbon transparency: Spaceborne imaging spectroscopy enables precise CO2 emission quantification at facility scale
Source: Research Square preprint supplement (doi:10.21203/rs.3.rs-5913782/v1), 2025-01-29
Supplement: Supplementary file 4 [file Band_CH4_v1.xlsx]

## Sheet: Sheet1
type	start	end	delete	start2	end2	delete2	start3	end3	delete3	start4	end4	delete4
GF5B	-1	-1	-1	-1	-1	-1	1623	1741	""	2136	2439	""
GF5A	-1	-1	-1	-1	-1	-1	1628	1738	""	2133	2436	""
GF5	-1	-1	-1	-1	-1	-1	1623	1741	""	2136	2439	""
ZY1E	-1	-1	-1	-1	-1	-1	1628	1738	""	2133	2436	""
ZY1F	-1	-1	-1	-1	-1	-1	1628	1738	""	2133	2436	""
