# Supplementary material for: Towards global carbon transparency: Spaceborne imaging spectroscopy enables precise CO2 emission quantification at facility scale
Source: Research Square preprint supplement (doi:10.21203/rs.3.rs-5913782/v1), 2025-01-29
Supplement: Supplementary file 5 [file Band_CO2_v1.xlsx]

## Sheet: Sheet1
type	start	end	delete	start2	end2	delete2	start3	end3	delete3	start4	end4	delete4
GF5B	1034	1051	""	1202	1261	"5,6"	1530	1615	"4"	1943	2119	""
GF5A	1039	1064	""	1207	1258	"4,5,6"	1527	1620	"4"	1948	2116	""
GF5	1038	1063	""	1206	1257	"2,4,5,6"	1528	1620	"4"	1948	2117	""
ZY1E	1039	1055	""	1207	1257	""	1543	1610	"2"	1946	2115	""
ZY1F	1043	1060	"2"	1262	1279	"2"	1531	1616	""	1953	2121	""
EMIT	1038	1059	""	1217	1262	""	1530	1620	""	1950	2120	""
PRISMA	1038	1059	""	1217	1262	""	1530	1620	""	1950	2120	""
