# Supplementary material for: Towards global carbon transparency: Spaceborne imaging spectroscopy enables precise CO2 emission quantification at facility scale
Source: Research Square preprint supplement (doi:10.21203/rs.3.rs-5913782/v1), 2025-01-29
Supplement: Supplementary file 6 [file CH4_k_v1.xlsx]

## Sheet: k_ZY1E
Wavelength	FWHM	k_Summer_M	k_Winter_M	k_1976_M
1005.6	16.26	0	0	0
1022.21	16.26	0	0	0
1039.19	16.26	0	0	0
1055.87	16.26	0	0	0
1072.55	16.26	0	0	0
1089.23	16.26	0	0	0
1105.91	16.26	0	0	0
1122.59	16.26	0	0	0
1139.44	16.26	0	0	0
1156.41	16.26	0	0	0
1173.29	16.26	0	0	0
1190.17	16.26	0	0	0
1207.04	16.26	0	0	0
1223.92	16.26	0	0	0
1240.8	16.26	0	0	0
1257.4	16.26	0	0	0
1274.15	16.26	0	0	0
1290.9	16.26	0	0	0
1307.65	16.26	0	0	0
1324.4	16.26	0	0	0
1341.16	16.26	0	0	0
1357.91	16.26	0	0	0
1374.87	16.26	0	0	0
1391.65	16.26	0	0	0
1408.49	16.26	0	0	0
1425.33	16.26	0	0	0
1442.17	16.26	0	0	0
1459.01	16.26	0	0	0
1475.85	16.26	0	0	0
1492.7	16.26	0	0	0
1509.54	16.26	0	0	0
1526.38	16.26	0	0	0
1543.22	16.26	0	0	0
1560.06	16.26	0	0	0
1576.9	16.26	0	0	0
1593.71	16.26	0	0	0
1610.39	16.26	0	6.67932e-11	6.67932e-11
1627.13	16.26	0.000809667	-4.27883e-08	-4.27883e-08
1644.01	16.26	0.00349414	-2.10732e-07	-2.10732e-07
1660.89	16.26	0.00361193	-7.98214e-07	-7.98214e-07
1677.77	16.26	0.0013296	-4.25662e-07	-4.25662e-07
1694.65	16.26	0.00168866	-1.16325e-06	-1.16325e-06
1711.53	16.26	0.00169935	-2.77551e-07	-2.77551e-07
1728.41	16.26	0.00211275	-2.26475e-07	-2.26475e-07
1745.28	16.26	0.000623696	-2.93775e-07	-2.93775e-07
1762.16	16.26	0.000450239	-9.61926e-08	-9.61926e-08
1778.85	16.26	0.000879778	-1.34136e-07	-1.34136e-07
1795.43	16.26	0.000973157	-6.64439e-07	-6.64439e-07
1812.02	16.26	0.000284875	-1.96232e-07	-1.96232e-07
1828.82	16.26	0	0	0
1845.62	16.26	0	0	0
1862.42	16.26	0	0	0
1880.13	16.26	0	0	0
1896.11	16.26	0	0	0
1912.97	16.26	0	0	0
1929.93	16.26	0	0	0
1946.82	16.26	0	0	0
1963.72	16.26	0	0	0
1980.61	16.26	0	0	0
1997.51	16.26	0	0	0
2014.4	16.26	0	0	0
2031.3	16.26	0	0	0
2048.13	16.26	0	0	0
2064.9	16.26	0	0	0
2081.61	16.26	0	0	0
2098.45	16.26	0	0	0
2115.29	16.26	0	0	0
2132.13	16.26	0	8.827e-11	8.827e-11
2148.97	16.26	0.000613341	-4.69773e-08	-4.69773e-08
2165.81	16.26	0.00161583	2.69543e-07	2.69543e-07
2182.64	16.26	0.00117014	-4.75772e-07	-4.75772e-07
2199.48	16.26	0.00747287	3.16505e-08	3.16505e-08
2216.32	16.26	0.0026958	-1.09142e-06	-1.09142e-06
2233.16	16.26	0.00887769	-2.63231e-06	-2.63231e-06
2250	16.26	0.0134546	-4.09234e-06	-4.09234e-06
2266.84	16.26	0.0180977	-6.80518e-06	-6.80518e-06
2283.67	16.26	0.0195866	-7.09636e-06	-7.09636e-06
2300.51	16.26	0.0253334	-1.60006e-05	-1.60006e-05
2317.35	16.26	0.0242876	-1.87025e-06	-1.87025e-06
2334.19	16.26	0.0211489	-5.97411e-06	-5.97411e-06
2350.4	16.26	0.0318247	-1.69443e-05	-1.69443e-05
2366.68	16.26	0.0289715	-1.75778e-05	-1.75778e-05
2384.12	16.26	0.0163572	-8.35768e-06	-8.35768e-06
2400.81	16.26	0.0135571	-5.71456e-06	-5.71456e-06
2417.5	16.26	0.00572782	-4.50304e-06	-4.50304e-06
2434.19	16.26	0.00400934	-5.9241e-07	-5.9241e-07
2450.88	16.26	0.00178754	-4.62217e-07	-4.62217e-07
2467.57	16.26	0.000817873	-5.99828e-08	-5.99828e-08
2484.32	16.26	0.000251747	-1.8326e-08	-1.8326e-08
2501.08	16.26	0.000208533	-2.37342e-07	-2.37342e-07

## Sheet: k_ZY1F
Wavelength	FWHM	k_Summer_M	k_Winter_M	k_1976_M
1009.7	16.848	0	0	0
1026.55	16.846	0	0	0
1043.4	16.846	0	0	0
1060.24	16.849	0	0	0
1077.09	16.845	0	0	0
1093.94	16.845	0	0	0
1110.78	16.848	0	0	0
1127.63	16.848	0	0	0
1144.48	16.845	0	0	0
1161.32	16.849	0	0	0
1178.17	16.845	0	0	0
1195.02	16.848	0	0	0
1211.86	16.845	0	0	0
1228.71	16.848	0	0	0
1245.56	16.848	0	0	0
1262.4	16.846	0	0	0
1279.25	16.845	0	0	0
1296.09	16.849	0	0	0
1312.94	16.845	0	0	0
1329.79	16.846	0	0	0
1346.63	16.848	0	0	0
1363.48	16.848	0	0	0
1380.33	16.845	0	0	0
1397.17	16.848	0	0	0
1414.02	16.848	0	0	0
1430.87	16.845	0	0	0
1447.71	16.846	0	0	0
1464.56	16.846	0	0	0
1481.41	16.846	0	0	0
1498.25	16.849	0	0	0
1515.1	16.844	0	0	0
1531.94	16.848	0	0	0
1548.79	16.848	0	0	0
1565.64	16.846	0	0	0
1582.49	16.845	0	0	0
1599.33	16.848	0	0	0
1616.18	16.846	7.32316e-05	7.76405e-10	7.76405e-10
1633.03	16.846	0.00201443	-6.10297e-07	-6.10297e-07
1649.87	16.848	0.00353672	-1.04613e-07	-1.04613e-07
1666.72	16.845	0.00520133	-1.42856e-06	-1.42856e-06
1683.56	16.849	0.00164146	-7.06435e-08	-7.06435e-08
1700.41	16.845	0.00202255	-2.20689e-07	-2.20689e-07
1717.26	16.846	0.00104031	7.22158e-08	7.22158e-08
1734.1	16.849	0.00147056	-1.57913e-07	-1.57913e-07
1750.95	16.845	0.00041105	-1.61987e-07	-1.61987e-07
1767.8	16.845	0.000775401	-2.16039e-07	-2.16039e-07
1784.64	16.849	0.000868191	-8.07966e-08	-8.07966e-08
1801.49	16.845	0.000263937	-1.85214e-07	-1.85214e-07
1818.34	16.846	0.000145455	-3.24053e-08	-3.24053e-08
1835.18	16.849	0	0	0
1852.03	16.846	0	0	0
1868.88	16.845	0	0	0
1885.72	16.848	0	0	0
1902.57	16.845	0	0	0
1919.41	16.848	0	0	0
1936.26	16.849	0	0	0
1953.11	16.845	0	0	0
1969.96	16.845	0	0	0
1986.8	16.846	0	0	0
2003.65	16.846	0	0	0
2020.49	16.848	0	0	0
2037.34	16.846	0	0	0
2054.19	16.848	0	0	0
2071.03	16.845	0	0	0
2087.88	16.846	0	0	0
2104.73	16.846	0	0	0
2121.57	16.849	0	3.20159e-12	3.20159e-12
2138.42	16.845	0.000109692	3.13353e-08	3.13353e-08
2155.27	16.848	0.00102153	9.02783e-08	9.02783e-08
2172.11	16.846	0.00165723	-2.24242e-07	-2.24242e-07
2188.96	16.846	0.000810102	2.8854e-07	2.8854e-07
2205.81	16.845	0.0064012	3.914e-07	3.914e-07
2222.65	16.85	0.00521704	-2.23666e-06	-2.23666e-06
2239.5	16.846	0.0111761	-2.1655e-06	-2.1655e-06
2256.35	16.845	0.0155758	-6.46388e-06	-6.46388e-06
2273.19	16.846	0.0176776	-6.30537e-06	-6.30537e-06
2290.04	16.848	0.0228288	-9.71285e-07	-9.71285e-07
2306.89	16.845	0.0204989	-6.22588e-06	-6.22588e-06
2323.73	16.848	0.0233875	1.87902e-06	1.87902e-06
2340.58	16.846	0.0285899	-1.07798e-05	-1.07798e-05
2357.43	16.848	0.0249855	-1.83332e-05	-1.83332e-05
2374.27	16.846	0.0302525	-9.0494e-06	-9.0494e-06
2391.12	16.845	0.0152822	-3.28761e-06	-3.28761e-06
2407.96	16.848	0.0093803	-2.28339e-06	-2.28339e-06
2424.81	16.848	0.00532276	-2.02247e-06	-2.02247e-06
2441.66	16.845	0.00266645	-8.63741e-07	-8.63741e-07
2458.5	16.849	0.0012767	-7.77765e-07	-7.77765e-07
2475.35	16.845	0.00048128	-5.27155e-08	-5.27155e-08
2492.2	16.846	0.000209397	-9.5822e-08	-9.5822e-08
2509.04	16.849	0.00017708	-8.21983e-08	-8.21983e-08

## Sheet: k_GF5B
Wavelength	FWHM	k_Summer_M	k_Winter_M	k_1976_M
1009	8.546	0	0	0
1017.42	8.546	0	0	0
1025.83	8.546	0	0	0
1034.25	8.546	0	0	0
1042.67	8.546	0	0	0
1051.08	8.546	0	0	0
1059.5	8.546	0	0	0
1067.92	8.546	0	0	0
1076.33	8.546	0	0	0
1084.75	8.546	0	0	0
1093.17	8.546	0	0	0
1101.58	8.546	0	0	0
1110	8.546	0	0	0
1118.42	8.546	0	0	0
1126.83	8.546	0	0	0
1135.25	8.546	0	0	0
1143.67	8.546	0	0	0
1152.08	8.546	0	0	0
1160.5	8.546	0	0	0
1168.92	8.546	0	0	0
1177.33	8.546	0	0	0
1185.75	8.546	0	0	0
1194.17	8.546	0	0	0
1202.58	8.546	0	0	0
1211	8.546	0	0	0
1219.42	8.546	0	0	0
1227.83	8.546	0	0	0
1236.25	8.546	0	0	0
1244.67	8.546	0	0	0
1253.08	8.546	0	0	0
1261.5	8.546	0	0	0
1269.92	8.546	0	0	0
1278.33	8.546	0	0	0
1286.75	8.546	0	0	0
1295.17	8.546	0	0	0
1303.58	8.546	0	0	0
1312	8.546	0	0	0
1320.42	8.546	0	0	0
1328.83	8.546	0	0	0
1337.25	8.546	0	0	0
1345.66	8.546	0	0	0
1354.08	8.546	0	0	0
1362.5	8.546	0	0	0
1370.91	8.546	0	0	0
1379.33	8.546	0	0	0
1387.75	8.546	0	0	0
1396.16	8.546	0	0	0
1404.58	8.546	0	0	0
1413	8.546	0	0	0
1421.41	8.546	0	0	0
1429.83	8.546	0	0	0
1438.25	8.546	0	0	0
1446.66	8.546	0	0	0
1455.08	8.546	0	0	0
1463.5	8.546	0	0	0
1471.91	8.546	0	0	0
1480.33	8.546	0	0	0
1488.75	8.546	0	0	0
1497.16	8.546	0	0	0
1505.58	8.546	0	0	0
1514	8.546	0	0	0
1522.41	8.546	0	0	0
1530.83	8.546	0	0	0
1539.25	8.546	0	0	0
1547.66	8.546	0	0	0
1556.08	8.546	0	0	0
1564.5	8.546	0	0	0
1572.91	8.546	0	0	0
1581.33	8.546	0	0	0
1589.75	8.546	0	0	0
1598.16	8.546	0	0	0
1606.58	8.546	0	5.4956e-13	5.4956e-13
1615	8.546	4.40017e-05	4.64285e-09	4.64285e-09
1623.41	8.546	0.00047821	-2.91155e-07	-2.91155e-07
1631.83	8.546	0.00166067	-6.7463e-07	-6.7463e-07
1640.25	8.546	0.0031939	2.21173e-07	2.21173e-07
1648.66	8.546	0.00362284	6.62507e-07	6.62507e-07
1657.08	8.546	0.00175167	3.80291e-07	3.80291e-07
1665.5	8.546	0.00571398	1.17805e-06	1.17805e-06
1673.91	8.546	0.0017344	4.50637e-07	4.50637e-07
1682.33	8.546	0.0017931	-5.44489e-08	-5.44489e-08
1690.75	8.546	0.00175658	-2.05972e-07	-2.05972e-07
1699.16	8.546	0.00197468	-1.97635e-07	-1.97635e-07
1707.58	8.546	0.00241497	-4.14694e-07	-4.14694e-07
1716	8.546	0.00100389	-3.51576e-07	-3.51576e-07
1724.41	8.546	0.0019937	-3.8686e-07	-3.8686e-07
1732.83	8.546	0.00159584	-1.123e-07	-1.123e-07
1741.25	8.546	0.000822559	-2.52952e-07	-2.52952e-07
1749.66	8.546	0.000440064	-1.79976e-07	-1.79976e-07
1758.08	8.546	0.00031596	3.15222e-08	3.15222e-08
1766.5	8.546	0.000717592	-3.07851e-08	-3.07851e-08
1774.91	8.546	0.00110663	-2.2908e-07	-2.2908e-07
1783.33	8.546	0.000706087	-1.60333e-07	-1.60333e-07
1791.75	8.546	0.00125487	-4.22732e-07	-4.22732e-07
1800.16	8.546	0.000333759	-2.68648e-07	-2.68648e-07
1808.58	8.546	0.000293382	4.64982e-10	4.64982e-10
1817	8.546	0.000190152	4.99384e-11	4.99384e-11
1825.41	8.546	3.48944e-06	2.53112e-13	2.53112e-13
1833.83	8.546	0	0	0
1842.25	8.546	0	0	0
1850.66	8.546	0	0	0
1859.08	8.546	0	0	0
1867.5	8.546	0	0	0
1875.91	8.546	0	0	0
1884.33	8.546	0	0	0
1892.75	8.546	0	0	0
1901.16	8.546	0	0	0
1909.58	8.546	0	0	0
1918	8.546	0	0	0
1926.41	8.546	0	0	0
1934.83	8.546	0	0	0
1943.25	8.546	0	0	0
1951.66	8.546	0	0	0
1960.08	8.546	0	0	0
1968.5	8.546	0	0	0
1976.91	8.546	0	0	0
1985.33	8.546	0	0	0
1993.75	8.546	0	0	0
2002.16	8.546	0	0	0
2010.58	8.546	0	0	0
2019	8.546	0	0	0
2027.41	8.546	0	0	0
2035.83	8.546	0	0	0
2044.25	8.546	0	0	0
2052.66	8.546	0	0	0
2061.08	8.546	0	0	0
2069.49	8.546	0	0	0
2077.91	8.546	0	0	0
2086.33	8.546	0	0	0
2094.74	8.546	0	0	0
2103.16	8.546	0	0	0
2111.58	8.546	0	0	0
2119.99	8.546	0	6.33567e-14	6.33567e-14
2128.41	8.546	0	2.93875e-12	2.93875e-12
2136.83	8.546	3.96302e-05	-1.76246e-09	-1.76246e-09
2145.24	8.546	0.00039227	-8.12519e-08	-8.12519e-08
2153.66	8.546	0.000924164	-2.49079e-07	-2.49079e-07
2162.08	8.546	0.00152331	6.58598e-07	6.58598e-07
2170.49	8.546	0.00173938	-6.65911e-08	-6.65911e-08
2178.91	8.546	0.00161454	6.90489e-08	6.90489e-08
2187.33	8.546	0.000742455	1.72085e-07	1.72085e-07
2195.74	8.546	0.00496385	-1.6122e-06	-1.6122e-06
2204.16	8.546	0.0089959	-3.22241e-06	-3.22241e-06
2212.58	8.546	0.00176769	-9.0427e-07	-9.0427e-07
2220.99	8.546	0.00457549	-8.20724e-07	-8.20724e-07
2229.41	8.546	0.00797898	-8.97524e-07	-8.97524e-07
2237.83	8.546	0.0103133	-9.05437e-07	-9.05437e-07
2246.24	8.546	0.0132251	3.56361e-07	3.56361e-07
2254.66	8.546	0.0146409	-1.70181e-06	-1.70181e-06
2263.08	8.546	0.0179561	-1.43974e-06	-1.43974e-06
2271.49	8.546	0.0177402	-7.62658e-06	-7.62658e-06
2279.91	8.546	0.0185292	-1.5564e-05	-1.5564e-05
2288.33	8.546	0.0209738	-3.49604e-06	-3.49604e-06
2296.74	8.546	0.0270295	-6.29618e-07	-6.29618e-07
2305.16	8.546	0.0223323	-6.34558e-06	-6.34558e-06
2313.58	8.546	0.0199225	-4.04061e-05	-4.04061e-05
2321.99	8.546	0.026849	-1.40753e-05	-1.40753e-05
2330.41	8.546	0.0169418	-1.40156e-05	-1.40156e-05
2338.83	8.546	0.0267209	-5.93903e-06	-5.93903e-06
2347.24	8.546	0.0348336	-3.25867e-06	-3.25867e-06
2355.66	8.546	0.0278243	-1.87421e-06	-1.87421e-06
2364.08	8.546	0.0194575	-1.74461e-06	-1.74461e-06
2372.49	8.546	0.0410514	-2.22585e-06	-2.22585e-06
2380.91	8.546	0.0168815	1.51063e-06	1.51063e-06
2389.33	8.546	0.0151799	-5.75797e-06	-5.75797e-06
2397.74	8.546	0.0155859	-1.04424e-05	-1.04424e-05
2406.16	8.546	0.0107137	-9.40935e-07	-9.40935e-07
2414.58	8.546	0.00485198	-8.00044e-07	-8.00044e-07
2422.99	8.546	0.00587232	-2.23774e-06	-2.23774e-06
2431.41	8.546	0.00430003	-7.46378e-07	-7.46378e-07
2439.83	8.546	0.00293539	-9.85248e-07	-9.85248e-07
2448.24	8.546	0.0020338	-9.91352e-07	-9.91352e-07
2456.66	8.546	0.00144377	-3.16562e-08	-3.16562e-08
2465.08	8.546	0.000819147	-3.82762e-07	-3.82762e-07
2473.49	8.546	0.000507726	-1.18049e-07	-1.18049e-07
2481.91	8.546	0.000275767	6.92329e-09	6.92329e-09
2490.33	8.546	0.000189532	3.86675e-09	3.86675e-09
2498.74	8.546	0.000247631	1.40516e-08	1.40516e-08
2507.16	8.546	0.000156199	1.40174e-08	1.40174e-08
2515.58	8.546	0.000143277	-6.89363e-09	-6.89363e-09

## Sheet: k_GF5A
Wavelength	FWHM	k_Summer_M	k_Winter_M	k_1976_M
1014.15	8.25	0	0	0
1022.56	8.25	0	0	0
1030.98	8.25	0	0	0
1039.4	8.25	0	0	0
1047.81	8.25	0	0	0
1056.23	8.25	0	0	0
1064.65	8.25	0	0	0
1073.06	8.25	0	0	0
1081.48	8.25	0	0	0
1089.9	8.25	0	0	0
1098.31	8.25	0	0	0
1106.73	8.25	0	0	0
1115.15	8.25	0	0	0
1123.56	8.25	0	0	0
1131.98	8.25	0	0	0
1140.4	8.25	0	0	0
1148.81	8.25	0	0	0
1157.23	8.25	0	0	0
1165.65	8.25	0	0	0
1174.06	8.25	0	0	0
1182.48	8.25	0	0	0
1190.9	8.25	0	0	0
1199.31	8.25	0	0	0
1207.73	8.25	0	0	0
1216.15	8.25	0	0	0
1224.56	8.25	0	0	0
1232.98	8.25	0	0	0
1241.4	8.25	0	0	0
1249.81	8.25	0	0	0
1258.23	8.25	0	0	0
1266.65	8.25	0	0	0
1275.06	8.25	0	0	0
1283.48	8.25	0	0	0
1291.9	8.25	0	0	0
1300.31	8.25	0	0	0
1308.73	8.25	0	0	0
1317.15	8.25	0	0	0
1325.56	8.25	0	0	0
1333.98	8.25	0	0	0
1342.4	8.25	0	0	0
1350.81	8.25	0	0	0
1359.23	8.25	0	0	0
1367.65	8.25	0	0	0
1376.06	8.25	0	0	0
1384.48	8.25	0	0	0
1392.9	8.25	0	0	0
1401.31	8.25	0	0	0
1409.73	8.25	0	0	0
1418.15	8.25	0	0	0
1426.56	8.25	0	0	0
1434.98	8.25	0	0	0
1443.4	8.25	0	0	0
1451.81	8.25	0	0	0
1460.23	8.25	0	0	0
1468.65	8.25	0	0	0
1477.06	8.25	0	0	0
1485.48	8.25	0	0	0
1493.9	8.25	0	0	0
1502.31	8.25	0	0	0
1510.73	8.25	0	0	0
1519.15	8.25	0	0	0
1527.56	8.25	0	0	0
1535.98	8.25	0	0	0
1544.4	8.25	0	0	0
1552.81	8.25	0	0	0
1561.23	8.25	0	0	0
1569.65	8.25	0	0	0
1578.06	8.25	0	0	0
1586.48	8.25	0	0	0
1594.9	8.25	0	0	0
1603.31	8.25	0	2.11312e-13	2.11312e-13
1611.73	8.25	6.89921e-06	-9.36748e-09	-9.36748e-09
1620.15	8.25	0.000240101	-2.4158e-08	-2.4158e-08
1628.56	8.25	0.00111492	6.17969e-09	6.17969e-09
1636.98	8.25	0.00264095	-2.65932e-06	-2.65932e-06
1645.4	8.25	0.00362412	-2.30731e-06	-2.30731e-06
1653.81	8.25	0.00271982	-6.24977e-07	-6.24977e-07
1662.23	8.25	0.00362644	3.3591e-08	3.3591e-08
1670.65	8.25	0.00335448	2.94134e-07	2.94134e-07
1679.06	8.25	0.0016081	1.74793e-07	1.74793e-07
1687.48	8.25	0.00183654	-1.2592e-06	-1.2592e-06
1695.9	8.25	0.00175622	-4.18935e-07	-4.18935e-07
1704.31	8.25	0.00253318	-4.27333e-07	-4.27333e-07
1712.73	8.25	0.00141377	-1.50369e-07	-1.50369e-07
1721.15	8.25	0.00147732	-9.2243e-08	-9.2243e-08
1729.56	8.25	0.00200593	-1.47558e-07	-1.47558e-07
1737.98	8.25	0.00105073	-1.41491e-07	-1.41491e-07
1746.4	8.25	0.000572349	-1.18948e-07	-1.18948e-07
1754.81	8.25	0.000315335	-5.71969e-08	-5.71969e-08
1763.23	8.25	0.000521239	-1.30932e-07	-1.30932e-07
1771.65	8.25	0.00104859	-4.04873e-07	-4.04873e-07
1780.06	8.25	0.000784272	-5.37809e-07	-5.37809e-07
1788.48	8.25	0.00117031	-3.7593e-07	-3.7593e-07
1796.9	8.25	0.000572316	-1.43456e-07	-1.43456e-07
1805.31	8.25	0.000292208	-1.05681e-08	-1.05681e-08
1813.73	8.25	0.00027081	-6.29893e-08	-6.29893e-08
1822.15	8.25	3.07168e-05	-2.66645e-08	-2.66645e-08
1830.56	8.25	0	0	0
1838.98	8.25	0	0	0
1847.4	8.25	0	0	0
1855.82	8.25	0	0	0
1864.23	8.25	0	0	0
1872.65	8.25	0	0	0
1881.07	8.25	0	0	0
1889.48	8.25	0	0	0
1897.9	8.25	0	0	0
1906.32	8.25	0	0	0
1914.73	8.25	0	0	0
1923.15	8.25	0	0	0
1931.57	8.25	0	0	0
1939.98	8.25	0	0	0
1948.4	8.25	0	0	0
1956.82	8.25	0	0	0
1965.23	8.25	0	0	0
1973.65	8.25	0	0	0
1982.07	8.25	0	0	0
1990.48	8.25	0	0	0
1998.9	8.25	0	0	0
2007.32	8.25	0	0	0
2015.73	8.25	0	0	0
2024.15	8.25	0	0	0
2032.57	8.25	0	0	0
2040.98	8.25	0	0	0
2049.4	8.25	0	0	0
2057.82	8.25	0	0	0
2066.23	8.25	0	0	0
2074.65	8.25	0	0	0
2083.07	8.25	0	0	0
2091.48	8.25	0	0	0
2099.9	8.25	0	0	0
2108.32	8.25	0	0	0
2116.73	8.25	0	0	0
2125.15	8.25	0	3.06644e-13	3.06644e-13
2133.57	8.25	4.75146e-06	1.35193e-11	1.35193e-11
2141.98	8.25	0.000214311	-5.88935e-08	-5.88935e-08
2150.4	8.25	0.000715079	-3.899e-07	-3.899e-07
2158.82	8.25	0.00130989	-5.54691e-07	-5.54691e-07
2167.23	8.25	0.00166022	-1.67893e-06	-1.67893e-06
2175.65	8.25	0.00172186	5.28589e-07	5.28589e-07
2184.07	8.25	0.00109516	6.15749e-07	6.15749e-07
2192.48	8.25	0.00138067	-1.18708e-06	-1.18708e-06
2200.9	8.25	0.0115698	-2.26898e-08	-2.26898e-08
2209.32	8.25	0.00227436	-1.65073e-06	-1.65073e-06
2217.73	8.25	0.00345235	-1.6463e-06	-1.6463e-06
2226.15	8.25	0.00621878	-1.5604e-06	-1.5604e-06
2234.57	8.25	0.00981409	-3.2402e-06	-3.2402e-06
2242.98	8.25	0.0122557	1.18185e-07	1.18185e-07
2251.4	8.25	0.0136247	-2.09198e-06	-2.09198e-06
2259.82	8.25	0.0168471	-1.01521e-05	-1.01521e-05
2268.23	8.25	0.0174645	-6.40413e-06	-6.40413e-06
2276.65	8.25	0.0181413	-6.93985e-06	-6.93985e-06
2285.07	8.25	0.0201337	-2.18553e-06	-2.18553e-06
2293.48	8.25	0.0249065	-3.28146e-06	-3.28146e-06
2301.9	8.25	0.0269001	-2.30395e-06	-2.30395e-06
2310.32	8.25	0.013175	2.20517e-06	2.20517e-06
2318.73	8.25	0.0345778	-1.14916e-05	-1.14916e-05
2327.15	8.25	0.0158274	-1.46912e-05	-1.46912e-05
2335.57	8.25	0.0220131	-6.51856e-06	-6.51856e-06
2343.98	8.25	0.0327316	-6.4329e-06	-6.4329e-06
2352.4	8.25	0.0318968	-2.57392e-07	-2.57392e-07
2360.82	8.25	0.0193286	-3.72764e-06	-3.72764e-06
2369.23	8.25	0.036983	-2.20638e-05	-2.20638e-05
2377.65	8.25	0.0245782	3.50185e-07	3.50185e-07
2386.07	8.25	0.0146335	3.83705e-07	3.83705e-07
2394.48	8.25	0.0162382	4.11495e-06	4.11495e-06
2402.9	8.25	0.0126869	-3.26557e-06	-3.26557e-06
2411.32	8.25	0.00617865	-6.40478e-06	-6.40478e-06
2419.73	8.25	0.00508831	-1.6378e-06	-1.6378e-06
2428.15	8.25	0.0056172	-5.90411e-06	-5.90411e-06
2436.57	8.25	0.00320165	-2.7787e-06	-2.7787e-06
2444.98	8.25	0.00232899	-7.03607e-07	-7.03607e-07
2453.4	8.25	0.00155301	-8.29847e-07	-8.29847e-07
2461.82	8.25	0.00103801	-8.34001e-07	-8.34001e-07
2470.23	8.25	0.00067099	-2.90621e-07	-2.90621e-07
2478.65	8.25	0.000338104	-1.53116e-07	-1.53116e-07
2487.07	8.25	0.000203274	-1.69097e-07	-1.69097e-07
2495.48	8.25	0.000218051	2.99608e-09	2.99608e-09
2503.9	8.25	0.000197235	-5.79562e-09	-5.79562e-09
2512.32	8.25	0.000145951	-1.32545e-07	-1.32545e-07
2520.73	8.25	0.000136604	-1.33378e-07	-1.33378e-07

## Sheet: k_GF5
Wavelength	FWHM	k_Summer_M	k_Winter_M	k_1976_M
1004.77	7.67828	0	0	0
1013.2	7.68189	0	0	0
1021.62	7.68551	0	0	0
1030.05	7.68912	0	0	0
1038.48	7.69273	0	0	0
1046.91	7.69634	0	0	0
1055.33	7.69995	0	0	0
1063.76	7.70356	0	0	0
1072.19	7.70718	0	0	0
1080.62	7.71079	0	0	0
1089.04	7.7144	0	0	0
1097.47	7.71801	0	0	0
1105.9	7.72162	0	0	0
1114.32	7.72523	0	0	0
1122.75	7.72885	0	0	0
1131.18	7.73246	0	0	0
1139.61	7.73607	0	0	0
1148.03	7.73968	0	0	0
1156.46	7.74329	0	0	0
1164.89	7.7469	0	0	0
1173.32	7.75052	0	0	0
1181.74	7.75413	0	0	0
1190.17	7.75774	0	0	0
1198.6	7.76135	0	0	0
1206.8	7.3271	0	0	0
1215.2	7.76857	0	0	0
1223.6	8.1949	0	0	0
1232.34	8.48475	0	0	0
1240.76	8.26	0	0	0
1249.21	7.78302	0	0	0
1257.66	7.78663	0	0	0
1266.1	7.79024	0	0	0
1274.55	7.79386	0	0	0
1283	7.79747	0	0	0
1291.45	7.80108	0	0	0
1299.9	7.80469	0	0	0
1308.34	7.8083	0	0	0
1316.79	7.81191	0	0	0
1325.24	7.81553	0	0	0
1333.69	7.81914	0	0	0
1342.14	7.82275	0	0	0
1350.58	7.82636	0	0	0
1359.03	7.82997	0	0	0
1367.48	7.83358	0	0	0
1375.93	7.8372	0	0	0
1384.37	7.84081	0	0	0
1392.82	7.84442	0	0	0
1401.27	7.84803	0	0	0
1409.72	7.85164	0	0	0
1418.17	7.85525	0	0	0
1426.61	7.85887	0	0	0
1435.06	7.86248	0	0	0
1443.51	7.86609	0	0	0
1451.96	7.8697	0	0	0
1460.4	7.87331	0	0	0
1468.85	7.87692	0	0	0
1477.3	7.88054	0	0	0
1485.75	7.88415	0	0	0
1494.2	7.88776	0	0	0
1502.64	7.89137	0	0	0
1511.09	7.89498	0	0	0
1519.54	7.89859	0	0	0
1527.99	7.90221	0	0	0
1536.43	7.90582	0	0	0
1544.88	7.90943	0	0	0
1553.33	6.6598	0	0	0
1560.93	8.4042	0	0	0
1569.23	7.8809	0	0	0
1577.61	7.45885	0	0	0
1586.31	7.4983	0	0	0
1594.96	7.7622	0	0	0
1603.38	7.93471	0	0	0
1611.79	7.93832	7.20405e-06	-6.08411e-09	-6.08411e-09
1620.21	7.94194	0.000237255	-6.42029e-08	-6.42029e-08
1628.63	7.94555	0.00111104	-1.90768e-07	-1.90768e-07
1637.05	7.94916	0.00265174	-4.70936e-07	-4.70936e-07
1645.47	7.95277	0.00367954	-3.23111e-07	-3.23111e-07
1653.89	7.95638	0.00260505	-6.36436e-09	-6.36436e-09
1662.31	7.95999	0.00358643	-1.55511e-06	-1.55511e-06
1670.73	7.96361	0.00306181	-1.34946e-06	-1.34946e-06
1679.15	7.96722	0.00162273	-5.41317e-08	-5.41317e-08
1687.57	7.97083	0.00183926	-2.49221e-07	-2.49221e-07
1695.99	7.97444	0.00174488	-2.76506e-07	-2.76506e-07
1704.41	7.97805	0.00254914	-8.06223e-07	-8.06223e-07
1712.83	7.98166	0.00134497	-2.9964e-07	-2.9964e-07
1721.25	7.98528	0.00147645	-4.9419e-07	-4.9419e-07
1729.67	7.98889	0.00197936	-8.36136e-07	-8.36136e-07
1738.08	7.9925	0.00102635	-4.31517e-07	-4.31517e-07
1746.5	7.99611	0.00057195	-5.65647e-08	-5.65647e-08
1754.92	7.99972	0.000309909	-3.86888e-08	-3.86888e-08
1763.34	8.00333	0.000520414	-2.39117e-07	-2.39117e-07
1771.76	8.00695	0.00105174	-3.99566e-07	-3.99566e-07
1780.18	8.01056	0.000755319	-2.61687e-07	-2.61687e-07
1788.6	8.01417	0.00118017	-7.68968e-07	-7.68968e-07
1797.02	8.01778	0.000557248	-3.17984e-07	-3.17984e-07
1805.44	8.02139	0.000292056	2.96612e-09	2.96612e-09
1813.86	8.025	0.000272624	1.37584e-08	1.37584e-08
1822.28	8.02862	2.86113e-05	3.15559e-09	3.15559e-09
1830.7	8.03223	0	0	0
1839.12	8.03584	0	0	0
1847.54	8.03945	0	0	0
1855.96	8.04306	0	0	0
1864.38	8.04667	0	0	0
1872.79	8.05029	0	0	0
1881.21	8.0539	0	0	0
1889.63	8.05751	0	0	0
1898.05	8.06112	0	0	0
1906.47	8.06473	0	0	0
1914.89	8.06834	0	0	0
1923.31	8.07196	0	0	0
1931.73	8.07557	0	0	0
1940.15	8.07918	0	0	0
1948.57	8.08279	0	0	0
1956.99	8.0864	0	0	0
1965.41	8.09001	0	0	0
1973.83	8.09363	0	0	0
1982.25	8.09724	0	0	0
1990.67	8.10085	0	0	0
1999.09	8.10446	0	0	0
2007.5	8.10807	0	0	0
2015.92	8.11168	0	0	0
2024.34	8.1153	0	0	0
2032.76	8.11891	0	0	0
2041.18	8.12252	0	0	0
2049.6	8.12613	0	0	0
2058.02	8.12974	0	0	0
2066.44	8.13335	0	0	0
2074.86	8.13697	0	0	0
2083.28	8.14058	0	0	0
2091.7	8.14419	0	0	0
2100.12	8.1478	0	0	0
2108.54	8.4804	0	0	0
2116.97	8.023	0	0	0
2125.41	8.476	0	7.25827e-13	7.25827e-13
2134.3	8.38695	9.94778e-06	-1.65878e-09	-1.65878e-09
2142.31	8.12115	0.000235127	-8.39212e-08	-8.39212e-08
2150.88	8.16947	0.000746785	-4.4352e-07	-4.4352e-07
2159.31	8.17308	0.0013521	-3.04707e-07	-3.04707e-07
2167.73	8.1767	0.00167414	-2.19886e-08	-2.19886e-08
2176.16	8.18031	0.00171686	3.9382e-09	3.9382e-09
2184.59	8.18392	0.00103227	-2.37502e-08	-2.37502e-08
2193.01	8.18753	0.00163147	-2.76652e-06	-2.76652e-06
2201.44	8.19114	0.0116262	-1.05052e-05	-1.05052e-05
2209.87	8.19475	0.00200784	-1.10208e-06	-1.10208e-06
2218.3	8.19837	0.00363667	-3.23046e-07	-3.23046e-07
2226.72	8.20198	0.0064397	-2.02988e-06	-2.02988e-06
2235.15	8.20559	0.00989589	-6.18089e-06	-6.18089e-06
2243.58	8.2092	0.0124769	-6.21552e-07	-6.21552e-07
2252.01	8.21281	0.0138391	-1.0892e-08	-1.0892e-08
2260.43	8.21642	0.0171264	-5.24682e-06	-5.24682e-06
2268.86	8.22004	0.0174356	-7.48559e-06	-7.48559e-06
2277.29	8.22365	0.0181066	-3.07632e-06	-3.07632e-06
2285.71	8.22726	0.0201739	2.92788e-06	2.92788e-06
2294.14	8.23087	0.0253128	1.68062e-06	1.68062e-06
2302.57	8.23448	0.0264265	-2.0584e-06	-2.0584e-06
2311	8.23809	0.0132758	1.00941e-06	1.00941e-06
2319.42	8.24171	0.0334012	-3.03346e-06	-3.03346e-06
2327.85	8.24532	0.0157662	-1.15598e-05	-1.15598e-05
2336.28	8.24893	0.02358	-1.15666e-05	-1.15666e-05
2344.71	8.25254	0.0332365	-1.69602e-05	-1.69602e-05
2353.13	8.25615	0.0312774	-1.12442e-05	-1.12442e-05
2361.56	8.25976	0.0181682	-6.47081e-06	-6.47081e-06
2369.99	8.26338	0.0405732	2.70342e-06	2.70342e-06
2378.41	8.26699	0.0211704	8.88432e-07	8.88432e-07
2386.84	8.2706	0.0147012	-1.29414e-06	-1.29414e-06
2395.27	8.27421	0.0162301	-3.33582e-06	-3.33582e-06
2403.7	8.27782	0.0121075	-4.78286e-06	-4.78286e-06
2412.12	8.28143	0.00577195	-7.25603e-07	-7.25603e-07
2420.55	8.28505	0.00531343	3.61053e-07	3.61053e-07
2428.98	8.28866	0.00535869	-7.50392e-07	-7.50392e-07
2437.41	8.29227	0.00316362	-1.40941e-06	-1.40941e-06
2445.83	8.29588	0.00227217	-1.41323e-06	-1.41323e-06
2454.26	8.29949	0.00152907	-8.00081e-07	-8.00081e-07
2462.69	8.3031	0.000982535	-2.12658e-07	-2.12658e-07
2471.11	8.30672	0.000642714	-4.71494e-07	-4.71494e-07
2479.54	8.31033	0.000326666	-2.74945e-07	-2.74945e-07
2487.97	8.31394	0.000196227	-1.91264e-07	-1.91264e-07
2496.4	8.31755	0.000226369	-2.12916e-07	-2.12916e-07
2504.82	8.32116	0.00017612	-2.13313e-07	-2.13313e-07
2513.25	8.32477	0.000145667	-1.95643e-07	-1.95643e-07
