# Supplementary material for: Towards global carbon transparency: Spaceborne imaging spectroscopy enables precise CO2 emission quantification at facility scale
Source: Research Square preprint supplement (doi:10.21203/rs.3.rs-5913782/v1), 2025-01-29
Supplement: Supplementary file 7 [file CH4_k_v2.xlsx]

## Sheet: k_ZY1E
Wavelength	FWHM	k_Summer_M	k_Winter_M	k_1976_M
1005.6	16.26	0
1022.21	16.26	0
1039.19	16.26	0
1055.87	16.26	0
1072.55	16.26	0
1089.23	16.26	4.27911e-06
1105.91	16.26	2.16078e-05
1122.59	16.26	0.000428688
1139.44	16.26	0.000347553
1156.41	16.26	0.00120947
1173.29	16.26	0.000662079
1190.17	16.26	0.000300485
1207.04	16.26	4.60089e-05
1223.92	16.26	4.65114e-06
1240.8	16.26	2.46138e-06
1257.4	16.26	0
1274.15	16.26	0
1290.9	16.26	0
1307.65	16.26	8.45325e-05
1324.4	16.26	0.000407511
1341.16	16.26	0.00100553
1357.91	16.26	9.97995e-05
1374.87	16.26	0.000207404
1391.65	16.26	0.000258672
1408.49	16.26	0.000443783
1425.33	16.26	0.000582588
1442.17	16.26	0.000155562
1459.01	16.26	7.81241e-05
1475.85	16.26	0.000103899
1492.7	16.26	2.00338e-05
1509.54	16.26	8.4287e-06
1526.38	16.26	2.02694e-06
1543.22	16.26	9.85136e-07
1560.06	16.26	2.38454e-07
1576.9	16.26	4.61283e-07
1593.71	16.26	2.12804e-06
1610.39	16.26	0.000109447
1627.13	16.26	0.00124321
1644.01	16.26	0.0055829
1660.89	16.26	0.006008
1677.77	16.26	0.00210739
1694.65	16.26	0.0025372
1711.53	16.26	0.00263548
1728.41	16.26	0.00321882
1745.28	16.26	0.000963672
1762.16	16.26	0.000689232
1778.85	16.26	0.00153889
1795.43	16.26	0.00192154
1812.02	16.26	0.00101386
1828.82	16.26	0.000167907
1845.62	16.26	2.98877e-05
1862.42	16.26	2.81523e-05
1880.13	16.26	7.85686e-06
1896.11	16.26	5.57028e-06
1912.97	16.26	1.0655e-05
1929.93	16.26	3.11335e-05
1946.82	16.26	2.63969e-05
1963.72	16.26	1.93718e-05
1980.61	16.26	1.41809e-05
1997.51	16.26	8.59075e-06
2014.4	16.26	5.72722e-06
2031.3	16.26	1.63144e-06
2048.13	16.26	1.65121e-06
2064.9	16.26	0
2081.61	16.26	1.99014e-06
2098.45	16.26	5.61298e-06
2115.29	16.26	2.1238e-05
2132.13	16.26	0.000185226
2148.97	16.26	0.00111223
2165.81	16.26	0.00277741
2182.64	16.26	0.00193751
2199.48	16.26	0.0119677
2216.32	16.26	0.00466295
2233.16	16.26	0.0122381
2250	16.26	0.0197368
2266.84	16.26	0.0281194
2283.67	16.26	0.0315644
2300.51	16.26	0.0378042
2317.35	16.26	0.0376799
2334.19	16.26	0.030898
2350.4	16.26	0.0528241
2366.68	16.26	0.0493008
2384.12	16.26	0.0295872
2400.81	16.26	0.019946
2417.5	16.26	0.00856135
2434.19	16.26	0.00592974
2450.88	16.26	0.00301106
2467.57	16.26	0.0015559
2484.32	16.26	0.000766885
2501.08	16.26	0.000638702

## Sheet: k_ZY1F
Wavelength	FWHM	k_Summer_M	k_Winter_M	k_1976_M
1009.7	16.848	0
1026.55	16.846	0
1043.4	16.846	0
1060.24	16.849	0
1077.09	16.845	0
1093.94	16.845	1.20738e-05
1110.78	16.848	5.86413e-05
1127.63	16.848	0.000495765
1144.48	16.845	0.000349849
1161.32	16.849	0.00130882
1178.17	16.845	0.000473177
1195.02	16.848	0.000150979
1211.86	16.845	2.39312e-05
1228.71	16.848	9.37876e-06
1245.56	16.848	1.97123e-06
1262.4	16.846	0
1279.25	16.845	0
1296.09	16.849	1.83937e-07
1312.94	16.845	0.000289245
1329.79	16.846	0.00110313
1346.63	16.848	0.000932159
1363.48	16.848	6.56788e-05
1380.33	16.845	0.000221003
1397.17	16.848	0.000292266
1414.02	16.848	0.000553432
1430.87	16.845	0.000429451
1447.71	16.846	0.000132441
1464.56	16.846	5.58692e-05
1481.41	16.846	6.91208e-05
1498.25	16.849	1.35137e-05
1515.1	16.844	5.69692e-06
1531.94	16.848	8.25703e-07
1548.79	16.848	3.63208e-07
1565.64	16.846	1.0755e-07
1582.49	16.845	0
1599.33	16.848	8.34021e-06
1616.18	16.846	0.000225479
1633.03	16.846	0.0030796
1649.87	16.848	0.00583691
1666.72	16.845	0.00840282
1683.56	16.849	0.00248398
1700.41	16.845	0.00301697
1717.26	16.846	0.00163898
1734.1	16.849	0.00222401
1750.95	16.845	0.000650327
1767.8	16.845	0.00121703
1784.64	16.849	0.00146678
1801.49	16.845	0.000553397
1818.34	16.846	0.000886721
1835.18	16.849	4.13855e-05
1852.03	16.846	2.47032e-05
1868.88	16.845	1.61312e-05
1885.72	16.848	1.08242e-05
1902.57	16.845	4.53778e-06
1919.41	16.848	3.9016e-05
1936.26	16.849	2.55863e-05
1953.11	16.845	2.17394e-05
1969.96	16.845	2.01972e-05
1986.8	16.846	1.11853e-05
2003.65	16.846	8.37639e-06
2020.49	16.848	2.59939e-06
2037.34	16.846	1.54066e-06
2054.19	16.848	1.8675e-06
2071.03	16.845	3.84848e-07
2087.88	16.846	2.05731e-06
2104.73	16.846	7.42235e-06
2121.57	16.849	4.52155e-05
2138.42	16.845	0.000416662
2155.27	16.848	0.00173933
2172.11	16.846	0.00287125
2188.96	16.846	0.00163292
2205.81	16.845	0.0104813
2222.65	16.85	0.00769208
2239.5	16.846	0.0158109
2256.35	16.845	0.0234691
2273.19	16.846	0.0279963
2290.04	16.848	0.0353981
2306.89	16.845	0.0311863
2323.73	16.848	0.0354891
2340.58	16.846	0.043417
2357.43	16.848	0.042714
2374.27	16.846	0.0523422
2391.12	16.845	0.0263954
2407.96	16.848	0.0134859
2424.81	16.848	0.00788204
2441.66	16.845	0.00414117
2458.5	16.849	0.00213114
2475.35	16.845	0.0011606
2492.2	16.846	0.000674962
2509.04	16.849	0.00055488

## Sheet: k_GF5B
Wavelength	FWHM	k_Summer_M	k_Winter_M	k_1976_M
1009	8.546	0
1017.42	8.546	0
1025.83	8.546	0
1034.25	8.546	0
1042.67	8.546	0
1051.08	8.546	0
1059.5	8.546	0
1067.92	8.546	0
1076.33	8.546	0
1084.75	8.546	1.414e-07
1093.17	8.546	1.04794e-05
1101.58	8.546	3.22345e-06
1110	8.546	5.09541e-05
1118.42	8.546	0.000174516
1126.83	8.546	0.000512994
1135.25	8.546	0.000539224
1143.67	8.546	0.00033604
1152.08	8.546	0.00104214
1160.5	8.546	0.00126924
1168.92	8.546	0.00094631
1177.33	8.546	0.000501737
1185.75	8.546	0.000327036
1194.17	8.546	0.000171093
1202.58	8.546	8.57665e-05
1211	8.546	2.68425e-05
1219.42	8.546	7.62797e-06
1227.83	8.546	8.58037e-06
1236.25	8.546	6.05293e-06
1244.67	8.546	2.27295e-06
1253.08	8.546	1.35477e-07
1261.5	8.546	0
1269.92	8.546	0
1278.33	8.546	0
1286.75	8.546	0
1295.17	8.546	1.87503e-07
1303.58	8.546	2.3878e-05
1312	8.546	0.000231241
1320.42	8.546	0.000434077
1328.83	8.546	0.000874065
1337.25	8.546	0.000676759
1345.66	8.546	0.00104223
1354.08	8.546	0.000458525
1362.5	8.546	6.84587e-05
1370.91	8.546	0.000106506
1379.33	8.546	0.000211899
1387.75	8.546	0.000237698
1396.16	8.546	0.000290326
1404.58	8.546	0.000475266
1413	8.546	0.000551476
1421.41	8.546	0.000529787
1429.83	8.546	0.000439592
1438.25	8.546	0.000198004
1446.66	8.546	0.000135773
1455.08	8.546	8.97759e-05
1463.5	8.546	6.12819e-05
1471.91	8.546	9.15536e-05
1480.33	8.546	7.28426e-05
1488.75	8.546	2.73798e-05
1497.16	8.546	1.43661e-05
1505.58	8.546	9.97681e-06
1514	8.546	6.6636e-06
1522.41	8.546	3.13747e-06
1530.83	8.546	1.17008e-06
1539.25	8.546	6.4381e-07
1547.66	8.546	4.7746e-07
1556.08	8.546	2.98257e-07
1564.5	8.546	6.40426e-08
1572.91	8.546	3.61504e-07
1581.33	8.546	0
1589.75	8.546	9.86219e-07
1598.16	8.546	7.522e-06
1606.58	8.546	5.58271e-05
1615	8.546	0.000190745
1623.41	8.546	0.00075292
1631.83	8.546	0.00251636
1640.25	8.546	0.00506103
1648.66	8.546	0.00591685
1657.08	8.546	0.00297717
1665.5	8.546	0.00925685
1673.91	8.546	0.00276595
1682.33	8.546	0.00272308
1690.75	8.546	0.00263696
1699.16	8.546	0.002942
1707.58	8.546	0.00368148
1716	8.546	0.00158402
1724.41	8.546	0.00307362
1732.83	8.546	0.00242608
1741.25	8.546	0.00126758
1749.66	8.546	0.000691429
1758.08	8.546	0.000506529
1766.5	8.546	0.00111899
1774.91	8.546	0.00187012
1783.33	8.546	0.00123186
1791.75	8.546	0.00223815
1800.16	8.546	0.000693663
1808.58	8.546	0.000844431
1817	8.546	0.00102216
1825.41	8.546	0.000201734
1833.83	8.546	6.15048e-05
1842.25	8.546	3.12199e-05
1850.66	8.546	2.44049e-05
1859.08	8.546	1.92845e-05
1867.5	8.546	1.59987e-05
1875.91	8.546	1.05759e-05
1884.33	8.546	1.10479e-05
1892.75	8.546	7.231e-06
1901.16	8.546	4.40283e-06
1909.58	8.546	4.81076e-06
1918	8.546	2.62287e-05
1926.41	8.546	3.98697e-05
1934.83	8.546	2.57339e-05
1943.25	8.546	3.08947e-05
1951.66	8.546	2.10278e-05
1960.08	8.546	2.09314e-05
1968.5	8.546	2.0882e-05
1976.91	8.546	1.71849e-05
1985.33	8.546	1.17513e-05
1993.75	8.546	8.863e-06
2002.16	8.546	9.62746e-06
2010.58	8.546	4.35419e-06
2019	8.546	2.80287e-06
2027.41	8.546	2.72647e-06
2035.83	8.546	1.54529e-06
2044.25	8.546	1.09205e-06
2052.66	8.546	1.94324e-06
2061.08	8.546	1.25075e-06
2069.49	8.546	9.84368e-08
2077.91	8.546	9.53476e-07
2086.33	8.546	1.35544e-06
2094.74	8.546	3.92469e-06
2103.16	8.546	5.80828e-06
2111.58	8.546	1.25031e-05
2119.99	8.546	3.43297e-05
2128.41	8.546	0.00011465
2136.83	8.546	0.000331196
2145.24	8.546	0.00080132
2153.66	8.546	0.00156464
2162.08	8.546	0.0025369
2170.49	8.546	0.00306724
2178.91	8.546	0.00259081
2187.33	8.546	0.00134344
2195.74	8.546	0.00815922
2204.16	8.546	0.0143832
2212.58	8.546	0.00359733
2220.99	8.546	0.00693291
2229.41	8.546	0.0109356
2237.83	8.546	0.0143465
2246.24	8.546	0.0192676
2254.66	8.546	0.021699
2263.08	8.546	0.0278893
2271.49	8.546	0.0276103
2279.91	8.546	0.0301663
2288.33	8.546	0.033022
2296.74	8.546	0.0401587
2305.16	8.546	0.0334019
2313.58	8.546	0.0313379
2321.99	8.546	0.041176
2330.41	8.546	0.0244742
2338.83	8.546	0.0397041
2347.24	8.546	0.055879
2355.66	8.546	0.0483447
2364.08	8.546	0.03291
2372.49	8.546	0.0709368
2380.91	8.546	0.0300254
2389.33	8.546	0.0286496
2397.74	8.546	0.0225699
2406.16	8.546	0.0154254
2414.58	8.546	0.00710031
2422.99	8.546	0.00870477
2431.41	8.546	0.00633786
2439.83	8.546	0.00427789
2448.24	8.546	0.00366484
2456.66	8.546	0.00233485
2465.08	8.546	0.00149524
2473.49	8.546	0.00119562
2481.91	8.546	0.000809523
2490.33	8.546	0.000646391
2498.74	8.546	0.000713216
2507.16	8.546	0.000457129
2515.58	8.546	0.000535639

## Sheet: k_GF5A
Wavelength	FWHM	k_Summer_M	k_Winter_M	k_1976_M
1014.15	8.25	0
1022.56	8.25	0
1030.98	8.25	0
1039.4	8.25	0
1047.81	8.25	0
1056.23	8.25	0
1064.65	8.25	0
1073.06	8.25	0
1081.48	8.25	0
1089.9	8.25	5.02051e-06
1098.31	8.25	3.38351e-06
1106.73	8.25	2.5404e-05
1115.15	8.25	0.000130579
1123.56	8.25	0.000456234
1131.98	8.25	0.000490168
1140.4	8.25	0.000345327
1148.81	8.25	0.000624328
1157.23	8.25	0.00112658
1165.65	8.25	0.00127856
1174.06	8.25	0.000650148
1182.48	8.25	0.000348571
1190.9	8.25	0.000258879
1199.31	8.25	0.000111776
1207.73	8.25	4.19259e-05
1216.15	8.25	1.22996e-05
1224.56	8.25	6.02352e-06
1232.98	8.25	9.56342e-06
1241.4	8.25	2.7684e-06
1249.81	8.25	8.60175e-07
1258.23	8.25	0
1266.65	8.25	0
1275.06	8.25	0
1283.48	8.25	0
1291.9	8.25	0
1300.31	8.25	4.5649e-06
1308.73	8.25	0.000116285
1317.15	8.25	0.000400865
1325.56	8.25	0.000413018
1333.98	8.25	0.00109071
1342.4	8.25	0.0010195
1350.81	8.25	0.000761643
1359.23	8.25	9.95971e-05
1367.65	8.25	6.40632e-05
1376.06	8.25	0.000203369
1384.48	8.25	0.000154822
1392.9	8.25	0.000273426
1401.31	8.25	0.000459047
1409.73	8.25	0.000534731
1418.15	8.25	0.00052914
1426.56	8.25	0.000512383
1434.98	8.25	0.000281646
1443.4	8.25	0.000146177
1451.81	8.25	0.000105186
1460.23	8.25	7.19824e-05
1468.65	8.25	7.73359e-05
1477.06	8.25	8.93883e-05
1485.48	8.25	3.96781e-05
1493.9	8.25	1.84194e-05
1502.31	8.25	1.04878e-05
1510.73	8.25	8.40999e-06
1519.15	8.25	4.18072e-06
1527.56	8.25	1.81791e-06
1535.98	8.25	6.93749e-07
1544.4	8.25	6.29487e-07
1552.81	8.25	2.57837e-07
1561.23	8.25	1.57625e-07
1569.65	8.25	2.98059e-07
1578.06	8.25	1.23714e-07
1586.48	8.25	2.63734e-07
1594.9	8.25	3.3662e-06
1603.31	8.25	2.691e-05
1611.73	8.25	0.000128407
1620.15	8.25	0.000419559
1628.56	8.25	0.0016923
1636.98	8.25	0.00411922
1645.4	8.25	0.00581477
1653.81	8.25	0.00457358
1662.23	8.25	0.00596266
1670.65	8.25	0.00534872
1679.06	8.25	0.00249682
1687.48	8.25	0.00275842
1695.9	8.25	0.00261895
1704.31	8.25	0.00381484
1712.73	8.25	0.0022018
1721.15	8.25	0.00229396
1729.56	8.25	0.00304811
1737.98	8.25	0.00160681
1746.4	8.25	0.000893764
1754.81	8.25	0.000509186
1763.23	8.25	0.000798405
1771.65	8.25	0.00170686
1780.06	8.25	0.00138535
1788.48	8.25	0.0019846
1796.9	8.25	0.00112388
1805.31	8.25	0.000774539
1813.73	8.25	0.00108402
1822.15	8.25	0.000366307
1830.56	8.25	0.000117791
1838.98	8.25	3.74024e-05
1847.4	8.25	2.79799e-05
1855.82	8.25	2.11788e-05
1864.23	8.25	1.58417e-05
1872.65	8.25	1.28682e-05
1881.07	8.25	1.09772e-05
1889.48	8.25	9.44804e-06
1897.9	8.25	6.28546e-06
1906.32	8.25	1.75482e-06
1914.73	8.25	1.48128e-05
1923.15	8.25	4.61309e-05
1931.57	8.25	2.64891e-05
1939.98	8.25	2.7149e-05
1948.4	8.25	2.70267e-05
1956.82	8.25	1.93953e-05
1965.23	8.25	2.18919e-05
1973.65	8.25	1.8174e-05
1982.07	8.25	1.46045e-05
1990.48	8.25	9.82679e-06
1998.9	8.25	1.07503e-05
2007.32	8.25	4.37837e-06
2015.73	8.25	4.77489e-06
2024.15	8.25	2.12511e-06
2032.57	8.25	2.18686e-06
2040.98	8.25	9.83948e-07
2049.4	8.25	1.45459e-06
2057.82	8.25	2.05941e-06
2066.23	8.25	1.84518e-07
2074.65	8.25	6.32714e-07
2083.07	8.25	1.05403e-06
2091.48	8.25	3.23879e-06
2099.9	8.25	4.40226e-06
2108.32	8.25	9.57712e-06
2116.73	8.25	2.15672e-05
2125.15	8.25	6.7895e-05
2133.57	8.25	0.000227585
2141.98	8.25	0.000558894
2150.4	8.25	0.00125475
2158.82	8.25	0.00217172
2167.23	8.25	0.00287507
2175.65	8.25	0.00290726
2184.07	8.25	0.00178015
2192.48	8.25	0.00260449
2200.9	8.25	0.0180977
2209.32	8.25	0.00442531
2217.73	8.25	0.00570327
2226.15	8.25	0.00870432
2234.57	8.25	0.0134711
2242.98	8.25	0.017612
2251.4	8.25	0.019989
2259.82	8.25	0.0259091
2268.23	8.25	0.0267233
2276.65	8.25	0.0296281
2285.07	8.25	0.0321405
2293.48	8.25	0.037828
2301.9	8.25	0.039566
2310.32	8.25	0.0207955
2318.73	8.25	0.0536174
2327.15	8.25	0.0235872
2335.57	8.25	0.031449
2343.98	8.25	0.0507953
2352.4	8.25	0.0550606
2360.82	8.25	0.0332513
2369.23	8.25	0.0639855
2377.65	8.25	0.0421937
2386.07	8.25	0.0278972
2394.48	8.25	0.0262602
2402.9	8.25	0.0173329
2411.32	8.25	0.00911366
2419.73	8.25	0.00764307
2428.15	8.25	0.00805916
2436.57	8.25	0.00472199
2444.98	8.25	0.00385149
2453.4	8.25	0.00268186
2461.82	8.25	0.0017454
2470.23	8.25	0.00147787
2478.65	8.25	0.000862755
2487.07	8.25	0.000660686
2495.48	8.25	0.000697336
2503.9	8.25	0.000578452
2512.32	8.25	0.00047306
2520.73	8.25	0.000552309

## Sheet: k_GF5
Wavelength	FWHM	k_Summer_M	k_Winter_M	k_1976_M
1004.77	7.67828	0
1013.2	7.68189	0
1021.62	7.68551	0
1030.05	7.68912	0
1038.48	7.69273	0
1046.91	7.69634	0
1055.33	7.69995	0
1063.76	7.70356	0
1072.19	7.70718	0
1080.62	7.71079	0
1089.04	7.7144	4.02265e-06
1097.47	7.71801	4.13328e-06
1105.9	7.72162	2.13346e-05
1114.32	7.72523	0.000122286
1122.75	7.72885	0.000409188
1131.18	7.73246	0.000438765
1139.61	7.73607	0.000370447
1148.03	7.73968	0.000565524
1156.46	7.74329	0.00116772
1164.89	7.7469	0.00133191
1173.32	7.75052	0.000694937
1181.74	7.75413	0.000370454
1190.17	7.75774	0.000277726
1198.6	7.76135	0.000115162
1206.8	7.3271	4.91366e-05
1215.2	7.76857	1.42556e-05
1223.6	8.1949	5.87934e-06
1232.34	8.48475	9.94943e-06
1240.76	8.26	3.00882e-06
1249.21	7.78302	9.65765e-07
1257.66	7.78663	0
1266.1	7.79024	0
1274.55	7.79386	0
1283	7.79747	0
1291.45	7.80108	0
1299.9	7.80469	3.48405e-06
1308.34	7.8083	0.000109848
1316.79	7.81191	0.000387773
1325.24	7.81553	0.000400113
1333.69	7.81914	0.00112527
1342.14	7.82275	0.001008
1350.58	7.82636	0.000770243
1359.03	7.82997	0.000101675
1367.48	7.83358	6.23734e-05
1375.93	7.8372	0.00020303
1384.37	7.84081	0.000146156
1392.82	7.84442	0.000269605
1401.27	7.84803	0.000460818
1409.72	7.85164	0.000534869
1418.17	7.85525	0.000528278
1426.61	7.85887	0.000514237
1435.06	7.86248	0.000275161
1443.51	7.86609	0.000146309
1451.96	7.8697	0.000104309
1460.4	7.87331	7.14438e-05
1468.85	7.87692	7.87113e-05
1477.3	7.88054	8.89652e-05
1485.75	7.88415	3.80299e-05
1494.2	7.88776	1.8173e-05
1502.64	7.89137	1.03315e-05
1511.09	7.89498	8.32005e-06
1519.54	7.89859	3.96351e-06
1527.99	7.90221	1.76751e-06
1536.43	7.90582	6.97505e-07
1544.88	7.90943	6.02844e-07
1553.33	6.6598	2.05839e-07
1560.93	8.4042	1.57736e-07
1569.23	7.8809	2.76446e-07
1577.61	7.45885	1.38021e-07
1586.31	7.4983	1.90993e-07
1594.96	7.7622	3.30818e-06
1603.38	7.93471	2.6657e-05
1611.79	7.93832	0.000132302
1620.21	7.94194	0.000414178
1628.63	7.94555	0.00168741
1637.05	7.94916	0.00413631
1645.47	7.95277	0.0059124
1653.89	7.95638	0.0043959
1662.31	7.95999	0.00590203
1670.73	7.96361	0.00487713
1679.15	7.96722	0.00251401
1687.57	7.97083	0.00276232
1695.99	7.97444	0.00260168
1704.41	7.97805	0.00383843
1712.83	7.98166	0.00209896
1721.25	7.98528	0.00229313
1729.67	7.98889	0.00300493
1738.08	7.9925	0.00157088
1746.5	7.99611	0.000893426
1754.92	7.99972	0.000501713
1763.34	8.00333	0.000796204
1771.76	8.00695	0.00171136
1780.18	8.01056	0.00133542
1788.6	8.01417	0.00199923
1797.02	8.01778	0.00108858
1805.44	8.02139	0.000777443
1813.86	8.025	0.00109848
1822.28	8.02862	0.000352598
1830.7	8.03223	0.000107562
1839.12	8.03584	3.66739e-05
1847.54	8.03945	2.80433e-05
1855.96	8.04306	2.12063e-05
1864.38	8.04667	1.57732e-05
1872.79	8.05029	1.28406e-05
1881.21	8.0539	1.0979e-05
1889.63	8.05751	9.47235e-06
1898.05	8.06112	6.32484e-06
1906.47	8.06473	1.81236e-06
1914.89	8.06834	1.54139e-05
1923.31	8.07196	4.67853e-05
1931.73	8.07557	2.64064e-05
1940.15	8.07918	2.73505e-05
1948.57	8.08279	2.71424e-05
1956.99	8.0864	1.93667e-05
1965.41	8.09001	2.1925e-05
1973.83	8.09363	1.80171e-05
1982.25	8.09724	1.46458e-05
1990.67	8.10085	9.69791e-06
1999.09	8.10446	1.0979e-05
2007.5	8.10807	4.23781e-06
2015.92	8.11168	4.83411e-06
2024.34	8.1153	2.10928e-06
2032.76	8.11891	2.09184e-06
2041.18	8.12252	9.69299e-07
2049.6	8.12613	1.44853e-06
2058.02	8.12974	1.9909e-06
2066.44	8.13335	1.39206e-07
2074.86	8.13697	6.32839e-07
2083.28	8.14058	1.06263e-06
2091.7	8.14419	3.25195e-06
2100.12	8.1478	4.38427e-06
2108.54	8.4804	9.59285e-06
2116.97	8.023	2.13596e-05
2125.41	8.476	7.27781e-05
2134.3	8.38695	0.000255152
2142.31	8.12115	0.000584588
2150.88	8.16947	0.00129942
2159.31	8.17308	0.00223826
2167.73	8.1767	0.00291016
2176.16	8.18031	0.0028736
2184.59	8.18392	0.00169383
2193.01	8.18753	0.00301546
2201.44	8.19114	0.0182003
2209.87	8.19475	0.00402041
2218.3	8.19837	0.00592032
2226.72	8.20198	0.00896909
2235.15	8.20559	0.0136061
2243.58	8.2092	0.0179815
2252.01	8.21281	0.0203261
2260.43	8.21642	0.0264262
2268.86	8.22004	0.0266712
2277.29	8.22365	0.0296144
2285.71	8.22726	0.0321371
2294.14	8.23087	0.0382728
2302.57	8.23448	0.0389209
2311	8.23809	0.021014
2319.42	8.24171	0.0516195
2327.85	8.24532	0.0233803
2336.28	8.24893	0.0340372
2344.71	8.25254	0.0517364
2353.13	8.25615	0.0541949
2361.56	8.25976	0.031091
2369.99	8.26338	0.0704894
2378.41	8.26699	0.0366675
2386.84	8.2706	0.0281396
2395.27	8.27421	0.0256307
2403.7	8.27782	0.0168348
2412.12	8.28143	0.00850065
2420.55	8.28505	0.00797876
2428.98	8.28866	0.00770778
2437.41	8.29227	0.00463452
2445.83	8.29588	0.00383472
2454.26	8.29949	0.00259856
2462.69	8.3031	0.00167766
2471.11	8.30672	0.00144277
2479.54	8.31033	0.000855548
2487.97	8.31394	0.000649941
2496.4	8.31755	0.000705691
2504.82	8.32116	0.000520309
2513.25	8.32477	0.000486257
