# Supplementary material for: Towards global carbon transparency: Spaceborne imaging spectroscopy enables precise CO2 emission quantification at facility scale
Source: Research Square preprint supplement (doi:10.21203/rs.3.rs-5913782/v1), 2025-01-29
Supplement: Supplementary file 8 [file CH4_k_v3.xlsx]

## Sheet: k_ZY1E
Wavelength	FWHM	k_Summer_M	k_Winter_M	k_1976_M
1005.6	16.26	0
1022.21	16.26	0
1039.19	16.26	0
1055.87	16.26	0
1072.55	16.26	0
1089.23	16.26	5.10344e-06
1105.91	16.26	2.65159e-05
1122.59	16.26	0.000333707
1139.44	16.26	0.000411001
1156.41	16.26	0.00121236
1173.29	16.26	0.000704141
1190.17	16.26	0.000248306
1207.04	16.26	5.3398e-05
1223.92	16.26	7.12696e-06
1240.8	16.26	3.86829e-06
1257.4	16.26	5.94194e-08
1274.15	16.26	0
1290.9	16.26	0
1307.65	16.26	0.000104023
1324.4	16.26	0.000601568
1341.16	16.26	0.000803976
1357.91	16.26	0.000290124
1374.87	16.26	0.000174696
1391.65	16.26	0.000262984
1408.49	16.26	0.00054065
1425.33	16.26	0.000488731
1442.17	16.26	0.000158402
1459.01	16.26	7.41578e-05
1475.85	16.26	8.89899e-05
1492.7	16.26	1.89491e-05
1509.54	16.26	7.57981e-06
1526.38	16.26	1.62277e-06
1543.22	16.26	7.4314e-07
1560.06	16.26	3.4133e-07
1576.9	16.26	3.36797e-07
1593.71	16.26	2.76462e-06
1610.39	16.26	0.000111119
1627.13	16.26	0.00134866
1644.01	16.26	0.00559813
1660.89	16.26	0.00662526
1677.77	16.26	0.0023363
1694.65	16.26	0.00270621
1711.53	16.26	0.00265065
1728.41	16.26	0.00300905
1745.28	16.26	0.000974996
1762.16	16.26	0.000736137
1778.85	16.26	0.00158787
1795.43	16.26	0.0018775
1812.02	16.26	0.000733168
1828.82	16.26	0.000169299
1845.62	16.26	2.97929e-05
1862.42	16.26	2.73764e-05
1880.13	16.26	8.91993e-06
1896.11	16.26	5.73084e-06
1912.97	16.26	1.06611e-05
1929.93	16.26	3.20791e-05
1946.82	16.26	2.48245e-05
1963.72	16.26	1.91772e-05
1980.61	16.26	1.38654e-05
1997.51	16.26	7.75703e-06
2014.4	16.26	5.51706e-06
2031.3	16.26	1.67282e-06
2048.13	16.26	1.60493e-06
2064.9	16.26	0
2081.61	16.26	2.17268e-06
2098.45	16.26	5.87462e-06
2115.29	16.26	2.0825e-05
2132.13	16.26	0.000198822
2148.97	16.26	0.00116857
2165.81	16.26	0.0029225
2182.64	16.26	0.00199917
2199.48	16.26	0.0127457
2216.32	16.26	0.00485089
2233.16	16.26	0.0124263
2250	16.26	0.0206073
2266.84	16.26	0.0268866
2283.67	16.26	0.0309816
2300.51	16.26	0.0397579
2317.35	16.26	0.0369669
2334.19	16.26	0.0311578
2350.4	16.26	0.0539116
2366.68	16.26	0.0504764
2384.12	16.26	0.0285251
2400.81	16.26	0.0204385
2417.5	16.26	0.0064902
2434.19	16.26	0.00553271
2450.88	16.26	0.00317224
2467.57	16.26	0.00144097
2484.32	16.26	0.000784831
2501.08	16.26	0.000635392

## Sheet: k_ZY1F
Wavelength	FWHM	k_Summer_M	k_Winter_M	k_1976_M
1009.7	16.848	0
1026.55	16.846	0
1043.4	16.846	0
1060.24	16.849	0
1077.09	16.845	0
1093.94	16.845	5.37142e-06
1110.78	16.848	6.16042e-05
1127.63	16.848	0.000469001
1144.48	16.845	0.000459676
1161.32	16.849	0.00123554
1178.17	16.845	0.000505
1195.02	16.848	0.000182692
1211.86	16.845	2.68333e-05
1228.71	16.848	8.03809e-06
1245.56	16.848	1.82834e-06
1262.4	16.846	0
1279.25	16.845	0
1296.09	16.849	1.64871e-06
1312.94	16.845	0.00023952
1329.79	16.846	0.000745611
1346.63	16.848	0.00102088
1363.48	16.848	7.83747e-05
1380.33	16.845	0.000184787
1397.17	16.848	0.00037454
1414.02	16.848	0.000534347
1430.87	16.845	0.000393599
1447.71	16.846	0.000122225
1464.56	16.846	7.26615e-05
1481.41	16.846	6.09939e-05
1498.25	16.849	1.37852e-05
1515.1	16.844	5.95526e-06
1531.94	16.848	1.30049e-06
1548.79	16.848	4.43772e-07
1565.64	16.846	1.74478e-07
1582.49	16.845	8.72774e-08
1599.33	16.848	1.20103e-05
1616.18	16.846	0.000260178
1633.03	16.846	0.00298727
1649.87	16.848	0.00537883
1666.72	16.845	0.00607477
1683.56	16.849	0.00262916
1700.41	16.845	0.00330761
1717.26	16.846	0.00194578
1734.1	16.849	0.00232999
1750.95	16.845	0.000650972
1767.8	16.845	0.00129231
1784.64	16.849	0.00159478
1801.49	16.845	0.000614608
1818.34	16.846	0.0010843
1835.18	16.849	4.7541e-05
1852.03	16.846	2.60761e-05
1868.88	16.845	1.49516e-05
1885.72	16.848	1.03845e-05
1902.57	16.845	4.11172e-06
1919.41	16.848	4.04782e-05
1936.26	16.849	2.55772e-05
1953.11	16.845	2.26874e-05
1969.96	16.845	1.96074e-05
1986.8	16.846	1.15429e-05
2003.65	16.846	8.78377e-06
2020.49	16.848	2.71713e-06
2037.34	16.846	1.49291e-06
2054.19	16.848	1.88698e-06
2071.03	16.845	4.16949e-07
2087.88	16.846	2.03823e-06
2104.73	16.846	7.40321e-06
2121.57	16.849	4.53603e-05
2138.42	16.845	0.000392223
2155.27	16.848	0.00183615
2172.11	16.846	0.00306373
2188.96	16.846	0.00142875
2205.81	16.845	0.0116825
2222.65	16.85	0.00719383
2239.5	16.846	0.0166449
2256.35	16.845	0.0233315
2273.19	16.846	0.026907
2290.04	16.848	0.0349661
2306.89	16.845	0.0262709
2323.73	16.848	0.0403958
2340.58	16.846	0.0434231
2357.43	16.848	0.040353
2374.27	16.846	0.0588751
2391.12	16.845	0.0283347
2407.96	16.848	0.0126571
2424.81	16.848	0.00800976
2441.66	16.845	0.00432418
2458.5	16.849	0.00206782
2475.35	16.845	0.00127015
2492.2	16.846	0.000693069
2509.04	16.849	0.000462775

## Sheet: k_GF5B
Wavelength	FWHM	k_Summer_M	k_Winter_M	k_1976_M
1009	8.546	0
1017.42	8.546	0
1025.83	8.546	0
1034.25	8.546	0
1042.67	8.546	0
1051.08	8.546	0
1059.5	8.546	0
1067.92	8.546	0
1076.33	8.546	0
1084.75	8.546	3.1943e-07
1093.17	8.546	9.5378e-06
1101.58	8.546	4.74305e-06
1110	8.546	5.39037e-05
1118.42	8.546	0.000175582
1126.83	8.546	0.000511075
1135.25	8.546	0.000519431
1143.67	8.546	0.000336337
1152.08	8.546	0.00103507
1160.5	8.546	0.00127922
1168.92	8.546	0.000952871
1177.33	8.546	0.000501737
1185.75	8.546	0.000327036
1194.17	8.546	0.000170818
1202.58	8.546	8.52709e-05
1211	8.546	2.70514e-05
1219.42	8.546	7.58411e-06
1227.83	8.546	8.59284e-06
1236.25	8.546	6.20283e-06
1244.67	8.546	2.27663e-06
1253.08	8.546	6.19672e-08
1261.5	8.546	0
1269.92	8.546	0
1278.33	8.546	0
1286.75	8.546	0
1295.17	8.546	1.07753e-07
1303.58	8.546	2.16848e-05
1312	8.546	0.000211046
1320.42	8.546	0.000461545
1328.83	8.546	0.000902186
1337.25	8.546	0.000650564
1345.66	8.546	0.00102533
1354.08	8.546	0.000355336
1362.5	8.546	6.49152e-05
1370.91	8.546	8.07914e-05
1379.33	8.546	0.000229202
1387.75	8.546	0.000241215
1396.16	8.546	0.000288292
1404.58	8.546	0.000500833
1413	8.546	0.000553725
1421.41	8.546	0.000532112
1429.83	8.546	0.000447263
1438.25	8.546	0.000195885
1446.66	8.546	0.000134723
1455.08	8.546	8.91749e-05
1463.5	8.546	5.74664e-05
1471.91	8.546	9.8401e-05
1480.33	8.546	7.84932e-05
1488.75	8.546	2.62885e-05
1497.16	8.546	1.49548e-05
1505.58	8.546	1.03149e-05
1514	8.546	6.58656e-06
1522.41	8.546	3.1944e-06
1530.83	8.546	9.33277e-07
1539.25	8.546	7.95703e-07
1547.66	8.546	4.85862e-07
1556.08	8.546	3.78118e-07
1564.5	8.546	8.03078e-08
1572.91	8.546	4.54909e-07
1581.33	8.546	0
1589.75	8.546	1.03187e-06
1598.16	8.546	6.04127e-06
1606.58	8.546	4.85507e-05
1615	8.546	0.000188755
1623.41	8.546	0.000668324
1631.83	8.546	0.00255006
1640.25	8.546	0.0049715
1648.66	8.546	0.00612679
1657.08	8.546	0.00294278
1665.5	8.546	0.0116276
1673.91	8.546	0.00210875
1682.33	8.546	0.00235619
1690.75	8.546	0.00281554
1699.16	8.546	0.00268735
1707.58	8.546	0.00400042
1716	8.546	0.00123403
1724.41	8.546	0.00346794
1732.83	8.546	0.00235794
1741.25	8.546	0.00120007
1749.66	8.546	0.000675542
1758.08	8.546	0.000461576
1766.5	8.546	0.00113395
1774.91	8.546	0.00210871
1783.33	8.546	0.000964863
1791.75	8.546	0.00256144
1800.16	8.546	0.00060315
1808.58	8.546	0.000660947
1817	8.546	0.00110786
1825.41	8.546	0.000191506
1833.83	8.546	4.1559e-05
1842.25	8.546	3.14495e-05
1850.66	8.546	2.27985e-05
1859.08	8.546	2.08869e-05
1867.5	8.546	1.61724e-05
1875.91	8.546	1.0929e-05
1884.33	8.546	1.16293e-05
1892.75	8.546	6.11626e-06
1901.16	8.546	1.14789e-06
1909.58	8.546	3.72377e-06
1918	8.546	1.20563e-05
1926.41	8.546	4.49598e-05
1934.83	8.546	2.69662e-05
1943.25	8.546	3.15144e-05
1951.66	8.546	1.94488e-05
1960.08	8.546	1.95167e-05
1968.5	8.546	2.22758e-05
1976.91	8.546	1.76494e-05
1985.33	8.546	8.9786e-06
1993.75	8.546	8.26948e-06
2002.16	8.546	9.39306e-06
2010.58	8.546	3.88537e-06
2019	8.546	2.97268e-06
2027.41	8.546	3.20725e-06
2035.83	8.546	1.33316e-06
2044.25	8.546	1.20013e-06
2052.66	8.546	1.93508e-06
2061.08	8.546	1.2254e-06
2069.49	8.546	0
2077.91	8.546	1.04931e-06
2086.33	8.546	8.30663e-07
2094.74	8.546	4.40383e-06
2103.16	8.546	5.67167e-06
2111.58	8.546	1.2324e-05
2119.99	8.546	3.37609e-05
2128.41	8.546	0.000107102
2136.83	8.546	0.000285953
2145.24	8.546	0.000869184
2153.66	8.546	0.0015701
2162.08	8.546	0.00230279
2170.49	8.546	0.00344783
2178.91	8.546	0.00238174
2187.33	8.546	0.0014029
2195.74	8.546	0.00552185
2204.16	8.546	0.016193
2212.58	8.546	0.00272172
2220.99	8.546	0.00630593
2229.41	8.546	0.0118494
2237.83	8.546	0.0141362
2246.24	8.546	0.0194253
2254.66	8.546	0.0217897
2263.08	8.546	0.0276967
2271.49	8.546	0.0294861
2279.91	8.546	0.0312621
2288.33	8.546	0.0323915
2296.74	8.546	0.0424067
2305.16	8.546	0.0350503
2313.58	8.546	0.0260521
2321.99	8.546	0.0384371
2330.41	8.546	0.0233944
2338.83	8.546	0.0409682
2347.24	8.546	0.0597856
2355.66	8.546	0.051397
2364.08	8.546	0.0240408
2372.49	8.546	0.0811294
2380.91	8.546	0.0279043
2389.33	8.546	0.0293051
2397.74	8.546	0.0227843
2406.16	8.546	0.0175471
2414.58	8.546	0.00537091
2422.99	8.546	0.00843346
2431.41	8.546	0.00589741
2439.83	8.546	0.00432616
2448.24	8.546	0.0039953
2456.66	8.546	0.00234483
2465.08	8.546	0.0013734
2473.49	8.546	0.000927899
2481.91	8.546	0.000905945
2490.33	8.546	0.000675258
2498.74	8.546	0.000723987
2507.16	8.546	0.00038591
2515.58	8.546	0.000575175

## Sheet: k_GF5A
Wavelength	FWHM	k_Summer_M	k_Winter_M	k_1976_M
1014.15	8.25	0
1022.56	8.25	0
1030.98	8.25	0
1039.4	8.25	0
1047.81	8.25	0
1056.23	8.25	0
1064.65	8.25	0
1073.06	8.25	0
1081.48	8.25	0
1089.9	8.25	5.58371e-06
1098.31	8.25	3.54028e-06
1106.73	8.25	2.49121e-05
1115.15	8.25	0.000127434
1123.56	8.25	0.00044484
1131.98	8.25	0.000490213
1140.4	8.25	0.000349352
1148.81	8.25	0.000631001
1157.23	8.25	0.00112658
1165.65	8.25	0.00127856
1174.06	8.25	0.000644401
1182.48	8.25	0.000348019
1190.9	8.25	0.00025952
1199.31	8.25	0.000111976
1207.73	8.25	4.2496e-05
1216.15	8.25	1.21617e-05
1224.56	8.25	5.85965e-06
1232.98	8.25	9.71495e-06
1241.4	8.25	2.71947e-06
1249.81	8.25	7.42276e-07
1258.23	8.25	0
1266.65	8.25	0
1275.06	8.25	0
1283.48	8.25	0
1291.9	8.25	0
1300.31	8.25	3.40181e-06
1308.73	8.25	0.000121273
1317.15	8.25	0.000365454
1325.56	8.25	0.000402763
1333.98	8.25	0.00112056
1342.4	8.25	0.00105578
1350.81	8.25	0.000704295
1359.23	8.25	9.47807e-05
1367.65	8.25	6.36839e-05
1376.06	8.25	0.000209054
1384.48	8.25	0.000127317
1392.9	8.25	0.000252201
1401.31	8.25	0.000464194
1409.73	8.25	0.000558881
1418.15	8.25	0.000529216
1426.56	8.25	0.000519046
1434.98	8.25	0.000261657
1443.4	8.25	0.000148751
1451.81	8.25	0.000106758
1460.23	8.25	7.28813e-05
1468.65	8.25	7.68052e-05
1477.06	8.25	9.14094e-05
1485.48	8.25	3.90581e-05
1493.9	8.25	1.88239e-05
1502.31	8.25	1.02526e-05
1510.73	8.25	8.40959e-06
1519.15	8.25	4.0572e-06
1527.56	8.25	2.14817e-06
1535.98	8.25	6.81779e-07
1544.4	8.25	6.89817e-07
1552.81	8.25	1.96985e-07
1561.23	8.25	0
1569.65	8.25	3.83823e-07
1578.06	8.25	0
1586.48	8.25	0
1594.9	8.25	3.01931e-06
1603.31	8.25	2.25415e-05
1611.73	8.25	0.000132283
1620.15	8.25	0.00039082
1628.56	8.25	0.00151118
1636.98	8.25	0.00456072
1645.4	8.25	0.00581021
1653.81	8.25	0.00479495
1662.23	8.25	0.00590762
1670.65	8.25	0.00302588
1679.06	8.25	0.00218403
1687.48	8.25	0.0030362
1695.9	8.25	0.00245829
1704.31	8.25	0.00415821
1712.73	8.25	0.00193609
1721.15	8.25	0.00225275
1729.56	8.25	0.00315513
1737.98	8.25	0.00160481
1746.4	8.25	0.000861034
1754.81	8.25	0.000456734
1763.23	8.25	0.0007155
1771.65	8.25	0.00185293
1780.06	8.25	0.00115579
1788.48	8.25	0.00226781
1796.9	8.25	0.00055138
1805.31	8.25	0.000807383
1813.73	8.25	0.00144485
1822.15	8.25	0.000207841
1830.56	8.25	5.33193e-05
1838.98	8.25	4.11019e-05
1847.4	8.25	2.84532e-05
1855.82	8.25	2.19409e-05
1864.23	8.25	1.48278e-05
1872.65	8.25	1.09655e-05
1881.07	8.25	1.09106e-05
1889.48	8.25	1.03589e-05
1897.9	8.25	7.08504e-06
1906.32	8.25	3.75021e-07
1914.73	8.25	1.44164e-05
1923.15	8.25	5.43673e-05
1931.57	8.25	2.56128e-05
1939.98	8.25	2.46449e-05
1948.4	8.25	2.64713e-05
1956.82	8.25	2.13216e-05
1965.23	8.25	2.0449e-05
1973.65	8.25	1.93771e-05
1982.07	8.25	1.44223e-05
1990.48	8.25	1.0548e-05
1998.9	8.25	1.29056e-05
2007.32	8.25	3.65439e-06
2015.73	8.25	6.14548e-06
2024.15	8.25	1.64798e-06
2032.57	8.25	2.27747e-06
2040.98	8.25	9.94282e-07
2049.4	8.25	1.18708e-06
2057.82	8.25	2.49251e-06
2066.23	8.25	0
2074.65	8.25	8.07821e-07
2083.07	8.25	9.36868e-07
2091.48	8.25	3.47344e-06
2099.9	8.25	3.91017e-06
2108.32	8.25	9.43679e-06
2116.73	8.25	1.83947e-05
2125.15	8.25	6.57919e-05
2133.57	8.25	0.000245618
2141.98	8.25	0.000491991
2150.4	8.25	0.00115792
2158.82	8.25	0.00244953
2167.23	8.25	0.00255762
2175.65	8.25	0.00347619
2184.07	8.25	0.00136622
2192.48	8.25	0.00139677
2200.9	8.25	0.0223307
2209.32	8.25	0.00256546
2217.73	8.25	0.00643082
2226.15	8.25	0.00724693
2234.57	8.25	0.0144205
2242.98	8.25	0.0187306
2251.4	8.25	0.0191498
2259.82	8.25	0.0263524
2268.23	8.25	0.0263301
2276.65	8.25	0.0280217
2285.07	8.25	0.0297139
2293.48	8.25	0.0382533
2301.9	8.25	0.0432536
2310.32	8.25	0.0129125
2318.73	8.25	0.0683954
2327.15	8.25	0.0205375
2335.57	8.25	0.0291928
2343.98	8.25	0.0512369
2352.4	8.25	0.0568577
2360.82	8.25	0.0289703
2369.23	8.25	0.0745607
2377.65	8.25	0.0355776
2386.07	8.25	0.0287234
2394.48	8.25	0.0259595
2402.9	8.25	0.016657
2411.32	8.25	0.00802566
2419.73	8.25	0.00748095
2428.15	8.25	0.00834198
2436.57	8.25	0.00522295
2444.98	8.25	0.0037117
2453.4	8.25	0.00257517
2461.82	8.25	0.00164833
2470.23	8.25	0.00171493
2478.65	8.25	0.00085963
2487.07	8.25	0.000620014
2495.48	8.25	0.000760386
2503.9	8.25	0.000426216
2512.32	8.25	0.000531364
2520.73	8.25	0.000566543

## Sheet: k_GF5
Wavelength	FWHM	k_Summer_M	k_Winter_M	k_1976_M
1004.77	7.67828	0
1013.2	7.68189	0
1021.62	7.68551	0
1030.05	7.68912	0
1038.48	7.69273	0
1046.91	7.69634	0
1055.33	7.69995	0
1063.76	7.70356	0
1072.19	7.70718	0
1080.62	7.71079	0
1089.04	7.7144	4.0883e-06
1097.47	7.71801	4.55359e-06
1105.9	7.72162	2.14073e-05
1114.32	7.72523	0.000120635
1122.75	7.72885	0.000409188
1131.18	7.73246	0.000438765
1139.61	7.73607	0.000360552
1148.03	7.73968	0.000564167
1156.46	7.74329	0.00117385
1164.89	7.7469	0.0013416
1173.32	7.75052	0.000692314
1181.74	7.75413	0.000372875
1190.17	7.75774	0.000279688
1198.6	7.76135	0.000115807
1206.8	7.3271	4.75814e-05
1215.2	7.76857	1.42285e-05
1223.6	8.1949	5.72464e-06
1232.34	8.48475	1.01652e-05
1240.76	8.26	2.87177e-06
1249.21	7.78302	8.58064e-07
1257.66	7.78663	0
1266.1	7.79024	0
1274.55	7.79386	0
1283	7.79747	0
1291.45	7.80108	0
1299.9	7.80469	2.26906e-06
1308.34	7.8083	9.89432e-05
1316.79	7.81191	0.000382111
1325.24	7.81553	0.000394551
1333.69	7.81914	0.00120597
1342.14	7.82275	0.00105856
1350.58	7.82636	0.000705529
1359.03	7.82997	9.88707e-05
1367.48	7.83358	6.1629e-05
1375.93	7.8372	0.00021045
1384.37	7.84081	0.000127023
1392.82	7.84442	0.000258442
1401.27	7.84803	0.000476295
1409.72	7.85164	0.000559592
1418.17	7.85525	0.00053032
1426.61	7.85887	0.000540074
1435.06	7.86248	0.000254494
1443.51	7.86609	0.000148953
1451.96	7.8697	0.000104131
1460.4	7.87331	7.26055e-05
1468.85	7.87692	8.29638e-05
1477.3	7.88054	8.94336e-05
1485.75	7.88415	3.79278e-05
1494.2	7.88776	1.82221e-05
1502.64	7.89137	1.0309e-05
1511.09	7.89498	8.5379e-06
1519.54	7.89859	3.81352e-06
1527.99	7.90221	1.97819e-06
1536.43	7.90582	7.29899e-07
1544.88	7.90943	7.26093e-07
1553.33	6.6598	0
1560.93	8.4042	1.9723e-07
1569.23	7.8809	1.70699e-07
1577.61	7.45885	0
1586.31	7.4983	0
1594.96	7.7622	2.93581e-06
1603.38	7.93471	2.13343e-05
1611.79	7.93832	0.000137069
1620.21	7.94194	0.000388968
1628.63	7.94555	0.00154056
1637.05	7.94916	0.00449452
1645.47	7.95277	0.00607015
1653.89	7.95638	0.00488762
1662.31	7.95999	0.00579806
1670.73	7.96361	0.00258928
1679.15	7.96722	0.0021914
1687.57	7.97083	0.00311625
1695.99	7.97444	0.00249104
1704.41	7.97805	0.00416191
1712.83	7.98166	0.00179718
1721.25	7.98528	0.00225506
1729.67	7.98889	0.00312365
1738.08	7.9925	0.00165526
1746.5	7.99611	0.000862968
1754.92	7.99972	0.000453098
1763.34	8.00333	0.000721733
1771.76	8.00695	0.00185827
1780.18	8.01056	0.00112715
1788.6	8.01417	0.00226295
1797.02	8.01778	0.000549133
1805.44	8.02139	0.000804209
1813.86	8.025	0.00144371
1822.28	8.02862	0.000207448
1830.7	8.03223	5.17335e-05
1839.12	8.03584	4.05072e-05
1847.54	8.03945	2.95379e-05
1855.96	8.04306	2.18552e-05
1864.38	8.04667	1.48089e-05
1872.79	8.05029	1.09744e-05
1881.21	8.0539	1.09302e-05
1889.63	8.05751	1.03665e-05
1898.05	8.06112	7.10781e-06
1906.47	8.06473	3.91417e-07
1914.89	8.06834	1.37391e-05
1923.31	8.07196	5.57505e-05
1931.73	8.07557	2.64982e-05
1940.15	8.07918	2.57316e-05
1948.57	8.08279	2.66085e-05
1956.99	8.0864	2.12579e-05
1965.41	8.09001	2.04606e-05
1973.83	8.09363	1.67038e-05
1982.25	8.09724	1.44903e-05
1990.67	8.10085	1.08074e-05
1999.09	8.10446	1.26685e-05
2007.5	8.10807	3.61025e-06
2015.92	8.11168	6.56788e-06
2024.34	8.1153	1.74415e-06
2032.76	8.11891	2.11991e-06
2041.18	8.12252	6.07566e-07
2049.6	8.12613	1.18527e-06
2058.02	8.12974	2.38386e-06
2066.44	8.13335	0
2074.86	8.13697	8.03593e-07
2083.28	8.14058	9.80067e-07
2091.7	8.14419	3.48278e-06
2100.12	8.1478	3.90808e-06
2108.54	8.4804	9.45098e-06
2116.97	8.023	1.84706e-05
2125.41	8.476	6.87292e-05
2134.3	8.38695	0.000278019
2142.31	8.12115	0.000517935
2150.88	8.16947	0.00126563
2159.31	8.17308	0.00233003
2167.73	8.1767	0.00255964
2176.16	8.18031	0.00339447
2184.59	8.18392	0.0013703
2193.01	8.18753	0.00148962
2201.44	8.19114	0.023162
2209.87	8.19475	0.00218904
2218.3	8.19837	0.00668955
2226.72	8.20198	0.00755643
2235.15	8.20559	0.0141555
2243.58	8.2092	0.0193895
2252.01	8.21281	0.0186344
2260.43	8.21642	0.0275826
2268.86	8.22004	0.0248241
2277.29	8.22365	0.029958
2285.71	8.22726	0.0306673
2294.14	8.23087	0.0346374
2302.57	8.23448	0.0402468
2311	8.23809	0.0106904
2319.42	8.24171	0.066318
2327.85	8.24532	0.0219775
2336.28	8.24893	0.0334139
2344.71	8.25254	0.0507419
2353.13	8.25615	0.0546457
2361.56	8.25976	0.0258986
2369.99	8.26338	0.0852973
2378.41	8.26699	0.0309017
2386.84	8.2706	0.0293031
2395.27	8.27421	0.0264896
2403.7	8.27782	0.0170998
2412.12	8.28143	0.00704595
2420.55	8.28505	0.00782629
2428.98	8.28866	0.00774771
2437.41	8.29227	0.00512219
2445.83	8.29588	0.00394251
2454.26	8.29949	0.00263671
2462.69	8.3031	0.00153463
2471.11	8.30672	0.0017845
2479.54	8.31033	0.000837475
2487.97	8.31394	0.000659619
2496.4	8.31755	0.000728444
2504.82	8.32116	0.000384047
2513.25	8.32477	0.000548456
