# Supplementary material for: Towards global carbon transparency: Spaceborne imaging spectroscopy enables precise CO2 emission quantification at facility scale
Source: Research Square preprint supplement (doi:10.21203/rs.3.rs-5913782/v1), 2025-01-29
Supplement: Supplementary file 9 [file 2024.10 甲烷比赛US.xlsx]

## Sheet: Sheet1
id	filename	foldername	facility	type	Latitude	Longitude	satellite	date	Time of Satellite	UTC	Local Standard Time	反演结果	不确定度	风速	排放	备注
1	GF5A_AHSI_W103.2_N32.3_20240128_006063_L10000089225	US_20240128_L10000089225	A01	Oil & Gas	32.1699	-103.18	GF5A	20240128	2024-01-28 19:54:30	2024-01-28 19:54:30	2024-01-28 13:54:30	2627.71	494.244	3.83
2	GF5A_AHSI_W103.2_N32.3_20240128_006063_L10000089225	US_20240128_L10000089225	A02	Oil & Gas	32.2019	-103.468	GF5A	20240128	2024-01-28 19:54:30	2024-01-28 19:54:30	2024-01-28 13:54:30	4075.24	755.871	3.83
3	GF5A_AHSI_W103.2_N32.3_20240128_006063_L10000089225	US_20240128_L10000089225	A03	Oil & Gas	32.5096	-103.287	GF5A	20240128	2024-01-28 19:54:30	2024-01-28 19:54:30	2024-01-28 13:54:30	2307.82	441.42	4.02
4	GF5A_AHSI_W103.2_N32.3_20240128_006063_L10000089225	US_20240128_L10000089225	A04	Oil & Gas	32.25	-103.494	GF5A	20240128	2024-01-28 19:54:30	2024-01-28 19:54:30	2024-01-28 13:54:30	2798.38	533.197	3.83
5	GF5A_AHSI_W103.2_N32.3_20240128_006063_L10000089225	US_20240128_L10000089225	A05	Oil & Gas	32.2216	-103.477	GF5A	20240128	2024-01-28 19:54:30	2024-01-28 19:54:30	2024-01-28 13:54:30	2298.7	445.777	3.83
6	GF5A_AHSI_W103.2_N32.3_20240128_006063_L10000089225	US_20240128_L10000089225	A06	Oil & Gas	32.1847	-103.369	GF5A	20240128	2024-01-28 19:54:30	2024-01-28 19:54:30	2024-01-28 13:54:30	2597.08	493.462	3.77
7	GF5A_AHSI_W103.2_N32.3_20240128_006063_L10000089225	US_20240128_L10000089225	A07	Oil & Gas	32.2388	-102.872	GF5A	20240128	2024-01-28 19:54:30	2024-01-28 19:54:30	2024-01-28 13:54:30	2299.75	441.605	4.05
8	GF5A_AHSI_W103.2_N32.3_20240128_006063_L10000089225	US_20240128_L10000089225	A08	Oil & Gas	32.0649	-103.443	GF5A	20240128	2024-01-28 19:54:30	2024-01-28 19:54:30	2024-01-28 13:54:30	2793.68	528.159	3.79
9	GF5A_AHSI_W103.2_N32.3_20240128_006063_L10000089225	US_20240128_L10000089225	A09	Oil & Gas	32.1348	-103.379	GF5A	20240128	2024-01-28 19:54:30	2024-01-28 19:54:30	2024-01-28 13:54:30	1676.29	330.558	3.77
10	GF5A_AHSI_W102.0_N32.3_20240114_005859_L10000084731	US_20240114_L10000084731	B01	Oil & Gas	32.4329	-101.831	GF5A	20240114	2024-01-14 19:49:58	2024-01-14 19:49:58	2024-01-14 13:49:58	7917.59	1433.57	3.91
11	GF5A_AHSI_W102.0_N32.3_20240114_005859_L10000084731	US_20240114_L10000084731	B02	Oil & Gas	32.401	-101.705	GF5A	20240114	2024-01-14 19:49:58	2024-01-14 19:49:58	2024-01-14 13:49:58	13291.3	2347.69	4.44
12	GF5A_AHSI_W102.0_N32.3_20240114_005859_L10000084731	US_20240114_L10000084731	B03	Oil & Gas	32.3363	-101.704	GF5A	20240114	2024-01-14 19:49:58	2024-01-14 19:49:58	2024-01-14 13:49:58	5964.49	1097.37	4.12
13	GF5A_AHSI_W102.0_N32.3_20240114_005859_L10000084731	US_20240114_L10000084731	B04	Oil & Gas	32.322	-101.814	GF5A	20240114	2024-01-14 19:49:58	2024-01-14 19:49:58	2024-01-14 13:49:58	10911.2	1963.25	4
14	GF5A_AHSI_W102.0_N32.3_20240114_005859_L10000084731	US_20240114_L10000084731	B05	Oil & Gas	32.2963	-101.836	GF5A	20240114	2024-01-14 19:49:58	2024-01-14 19:49:58	2024-01-14 13:49:58	6660.81	1222.85	4
15	GF5A_AHSI_W102.0_N32.3_20240114_005859_L10000084731	US_20240114_L10000084731	B06	Oil & Gas	32.211	-101.913	GF5A	20240114	2024-01-14 19:49:58	2024-01-14 19:49:58	2024-01-14 13:49:58	7879.14	1417.65	4.1
16	GF5A_AHSI_W102.0_N32.3_20240114_005859_L10000084731	US_20240114_L10000084731	B07	Oil & Gas	32.2622	-101.982	GF5A	20240114	2024-01-14 19:49:58	2024-01-14 19:49:58	2024-01-14 13:49:58	12197.6	2170.04	4.2
17	GF5A_AHSI_W102.0_N32.3_20240114_005859_L10000084731	US_20240114_L10000084731	B08	Oil & Gas	32.326	-101.983	GF5A	20240114	2024-01-14 19:49:58	2024-01-14 19:49:58	2024-01-14 13:49:58	6550.08	1185.05	4.11
18	GF5A_AHSI_W102.0_N32.3_20240114_005859_L10000084731	US_20240114_L10000084731	B09	Oil & Gas	32.2011	-101.963	GF5A	20240114	2024-01-14 19:49:58	2024-01-14 19:49:58	2024-01-14 13:49:58	13906.9	2467.18	4.2
19	GF5A_AHSI_W102.0_N32.3_20240114_005859_L10000084731	US_20240114_L10000084731	B10	Oil & Gas	32.1998	-101.993	GF5A	20240114	2024-01-14 19:49:58	2024-01-14 19:49:58	2024-01-14 13:49:58	10034.1	1799.42	4.2
20	GF5A_AHSI_W102.0_N32.3_20240114_005859_L10000084731	US_20240114_L10000084731	B11	Oil & Gas	32.2307	-102.087	GF5A	20240114	2024-01-14 19:49:58	2024-01-14 19:49:58	2024-01-14 13:49:58	7622.51	1383.38	4.1
21	GF5A_AHSI_W102.0_N32.3_20240114_005859_L10000084731	US_20240114_L10000084731	B12	Oil & Gas	32.2862	-101.753	GF5A	20240114	2024-01-14 19:49:58	2024-01-14 19:49:58	2024-01-14 13:49:58	3055.3	591.314	4
22	GF5B_AHSI_W101.5_N32.3_20240407_013747_L10000496595	US_20240407_L10000496595	C01	Oil & Gas	32.3646	-101.326	GF5B	20240407	2024-04-08 01:41:15	2024-04-07 17:41:15	2024-04-07 11:41:15	12033	2031.16	7.4
23	GF5B_AHSI_W101.5_N32.3_20240407_013747_L10000496595	US_20240407_L10000496595	C02	Oil & Gas	32.3275	-101.819	GF5B	20240407	2024-04-08 01:41:15	2024-04-07 17:41:15	2024-04-07 11:41:15	15550	2618.17	6.41
24	GF5B_AHSI_W101.5_N32.3_20240407_013747_L10000496595	US_20240407_L10000496595	C03	Oil & Gas	32.401	-101.705	GF5B	20240407	2024-04-08 01:41:15	2024-04-07 17:41:15	2024-04-07 11:41:15	7753.49	1338.78	6.41
