# Supplementary material for: Towards global carbon transparency: Spaceborne imaging spectroscopy enables precise CO2 emission quantification at facility scale
Source: Research Square preprint supplement (doi:10.21203/rs.3.rs-5913782/v1), 2025-01-29
Supplement: Supplementary file 10 [file 2024.9 甲烷比赛US.xlsx]

## Sheet: Sheet1
id	filename	foldername	facility	type	Latitude	Longitude	satellite	date	Time of Satellite	UTC	Local Standard Time	反演结果	不确定度	风速	排放	备注
1	GF5A_AHSI_W102.0_N32.3_20230710_003000_L10000050000	US_20230710_L10000050000	B01	Oil & Gas	32.4345	-101.831	GF5A	20230710	2024-01-15 03:49:58	2024-01-14 19:49:58	2024-01-14 13:49:58	7.75732	1.40109	3.91
2	GF5A_AHSI_W102.0_N32.3_20230710_003000_L10000050000	US_20230710_L10000050000	B02	Oil & Gas	32.401	-101.705	GF5A	20230710	2024-01-15 03:49:58	2024-01-14 19:49:58	2024-01-14 13:49:58	12.1755	2.15051	4.44
3	GF5A_AHSI_W102.0_N32.3_20230710_003000_L10000050000	US_20230710_L10000050000	B03	Oil & Gas	32.3363	-101.704	GF5A	20230710	2024-01-15 03:49:58	2024-01-14 19:49:58	2024-01-14 13:49:58	5.58527	1.01434	4.12
4	GF5A_AHSI_W102.0_N32.3_20230710_003000_L10000050000	US_20230710_L10000050000	B04	Oil & Gas	32.3224	-101.812	GF5A	20230710	2024-01-15 03:49:58	2024-01-14 19:49:58	2024-01-14 13:49:58	11.2955	2.03297	4
5	GF5A_AHSI_W102.0_N32.3_20230710_003000_L10000050000	US_20230710_L10000050000	B05	Oil & Gas	32.2964	-101.836	GF5A	20230710	2024-01-15 03:49:58	2024-01-14 19:49:58	2024-01-14 13:49:58	6.83961	1.24622	4
6	GF5A_AHSI_W102.0_N32.3_20230710_003000_L10000050000	US_20230710_L10000050000	B06	Oil & Gas	32.211	-101.913	GF5A	20230710	2024-01-15 03:49:58	2024-01-14 19:49:58	2024-01-14 13:49:58	6.22013	1.1154	4.1
7	GF5A_AHSI_W102.0_N32.3_20230710_003000_L10000050000	US_20230710_L10000050000	B07	Oil & Gas	32.2622	-101.982	GF5A	20230710	2024-01-15 03:49:58	2024-01-14 19:49:58	2024-01-14 13:49:58	8.0908	1.45893	4.2
8	GF5A_AHSI_W102.0_N32.3_20230710_003000_L10000050000	US_20230710_L10000050000	B08	Oil & Gas	32.326	-101.983	GF5A	20230710	2024-01-15 03:49:58	2024-01-14 19:49:58	2024-01-14 13:49:58	6.08159	1.09745	4.11
9	GF5A_AHSI_W102.0_N32.3_20230710_003000_L10000050000	US_20230710_L10000050000	B09	Oil & Gas	32.2011	-101.963	GF5A	20230710	2024-01-15 03:49:58	2024-01-14 19:49:58	2024-01-14 13:49:58	8.22938	1.47606	4.2
10	GF5A_AHSI_W102.0_N32.3_20230710_003000_L10000050000	US_20230710_L10000050000	B10	Oil & Gas	32.1998	-101.993	GF5A	20230710	2024-01-15 03:49:58	2024-01-14 19:49:58	2024-01-14 13:49:58	5.17794	0.955576	4.2
11	GF5B_AHSI_W111.9_N32.8_20221218_000500_L1000010000	US_20221218_L1000010000	A02	Livestock	32.9161	-111.983	GF5B	20221218	2022-09-19 02:19:41	2022-09-19 18:19:41	2022-09-19 11:19:41	0.75028	0.162105	1.84
12	GF5B_AHSI_W111.9_N32.8_20221218_000500_L1000010000	US_20221218_L1000010000	A03	Livestock	32.9146	-111.972	GF5B	20221218	2022-09-19 02:19:41	2022-09-19 18:19:41	2022-09-19 11:19:41	0.901489	0.192095	1.84
13	GF5B_AHSI_W111.9_N32.8_20221218_000500_L1000010000	US_20221218_L1000010000	A04	Livestock	32.8694	-111.896	GF5B	20221218	2022-09-19 02:19:41	2022-09-19 18:19:41	2022-09-19 11:19:41	1.60706	0.33488	1.64
14	GF5B_AHSI_W112.1_N32.8_20230101_001000_L1000020000	US_20230101_L1000020000	A01	Solid Waste	33.083	-112.285	GF5B	20230101	2022-11-16 02:21:44	2022-11-15 18:21:44	2022-11-15 11:21:44	3.03725	0.604385	2.21
15	GF5B_AHSI_W112.1_N32.8_20230101_001000_L1000020000	US_20230101_L1000020000	A02	Livestock	32.9161	-111.983	GF5B	20230101	2022-11-16 02:21:44	2022-11-15 18:21:44	2022-11-15 11:21:44	1.16319	0.276553	0.8
16	GF5B_AHSI_W112.1_N32.8_20230101_001000_L1000020000	US_20230101_L1000020000	A03	Livestock	32.9146	-111.972	GF5B	20230101	2022-11-16 02:21:44	2022-11-15 18:21:44	2022-11-15 11:21:44	0.963712	0.231507	0.8
17	GF5B_AHSI_W112.1_N32.8_20230101_001000_L1000020000	US_20230101_L1000020000	A04	Livestock	32.8694	-111.896	GF5B	20230101	2022-11-16 02:21:44	2022-11-15 18:21:44	2022-11-15 11:21:44	2.27122	0.519809	0.85

## Sheet: Sheet1 (2)
id	filename	foldername	facility	type	Latitude	Longitude	satellite	date	Time of Satellite	UTC	Local Standard Time	反演结果	不确定度	风速	排放	备注	列1
1	GF5A_AHSI_W102.0_N32.3_20230710_003000_L10000050000	US_20230710_L10000050000	B01	Oil & Gas	32.4345	-101.831	GF5A	20230710	2024-01-15 03:49:58	2024-01-14 19:49:58	2024-01-14 13:49:58	7757.32	1401.09	3.91			A
2	GF5A_AHSI_W102.0_N32.3_20230710_003000_L10000050000	US_20230710_L10000050000	B02	Oil & Gas	32.401	-101.705	GF5A	20230710	2024-01-15 03:49:58	2024-01-14 19:49:58	2024-01-14 13:49:58	12175.5	2150.51	4.44			B
3	GF5A_AHSI_W102.0_N32.3_20230710_003000_L10000050000	US_20230710_L10000050000	B03	Oil & Gas	32.3363	-101.704	GF5A	20230710	2024-01-15 03:49:58	2024-01-14 19:49:58	2024-01-14 13:49:58	5585.27	1014.34	4.12			C
4	GF5A_AHSI_W102.0_N32.3_20230710_003000_L10000050000	US_20230710_L10000050000	B04	Oil & Gas	32.3224	-101.812	GF5A	20230710	2024-01-15 03:49:58	2024-01-14 19:49:58	2024-01-14 13:49:58	11295.5	2032.97	4			D
5	GF5A_AHSI_W102.0_N32.3_20230710_003000_L10000050000	US_20230710_L10000050000	B05	Oil & Gas	32.2964	-101.836	GF5A	20230710	2024-01-15 03:49:58	2024-01-14 19:49:58	2024-01-14 13:49:58	6839.61	1246.22	4			E
6	GF5A_AHSI_W102.0_N32.3_20230710_003000_L10000050000	US_20230710_L10000050000	B06	Oil & Gas	32.211	-101.913	GF5A	20230710	2024-01-15 03:49:58	2024-01-14 19:49:58	2024-01-14 13:49:58	6220.13	1115.4	4.1			F
7	GF5A_AHSI_W102.0_N32.3_20230710_003000_L10000050000	US_20230710_L10000050000	B07	Oil & Gas	32.2622	-101.982	GF5A	20230710	2024-01-15 03:49:58	2024-01-14 19:49:58	2024-01-14 13:49:58	8090.8	1458.93	4.2			G
8	GF5A_AHSI_W102.0_N32.3_20230710_003000_L10000050000	US_20230710_L10000050000	B08	Oil & Gas	32.326	-101.983	GF5A	20230710	2024-01-15 03:49:58	2024-01-14 19:49:58	2024-01-14 13:49:58	6081.59	1097.45	4.11			H
9	GF5A_AHSI_W102.0_N32.3_20230710_003000_L10000050000	US_20230710_L10000050000	B09	Oil & Gas	32.2011	-101.963	GF5A	20230710	2024-01-15 03:49:58	2024-01-14 19:49:58	2024-01-14 13:49:58	8229.38	1476.06	4.2			I
10	GF5A_AHSI_W102.0_N32.3_20230710_003000_L10000050000	US_20230710_L10000050000	B10	Oil & Gas	32.1998	-101.993	GF5A	20230710	2024-01-15 03:49:58	2024-01-14 19:49:58	2024-01-14 13:49:58	5177.94	955.576	4.2			J
11	GF5B_AHSI_W111.9_N32.8_20221218_000500_L1000010000	US_20221218_L1000010000	A02	Livestock	32.9161	-111.983	GF5B	20221218	2022-09-19 02:19:41	2022-09-19 18:19:41	2022-09-19 11:19:41	750.28	162.105	1.84
12	GF5B_AHSI_W111.9_N32.8_20221218_000500_L1000010000	US_20221218_L1000010000	A03	Livestock	32.9146	-111.972	GF5B	20221218	2022-09-19 02:19:41	2022-09-19 18:19:41	2022-09-19 11:19:41	901.489	192.095	1.84
13	GF5B_AHSI_W111.9_N32.8_20221218_000500_L1000010000	US_20221218_L1000010000	A04	Livestock	32.8694	-111.896	GF5B	20221218	2022-09-19 02:19:41	2022-09-19 18:19:41	2022-09-19 11:19:41	1607.06	334.88	1.64
14	GF5B_AHSI_W112.1_N32.8_20230101_001000_L1000020000	US_20230101_L1000020000	A01	Solid Waste	33.083	-112.285	GF5B	20230101	2022-11-16 02:21:44	2022-11-15 18:21:44	2022-11-15 11:21:44	3037.25	604.385	2.21
15	GF5B_AHSI_W112.1_N32.8_20230101_001000_L1000020000	US_20230101_L1000020000	A02	Livestock	32.9161	-111.983	GF5B	20230101	2022-11-16 02:21:44	2022-11-15 18:21:44	2022-11-15 11:21:44	1163.19	276.553	0.8
16	GF5B_AHSI_W112.1_N32.8_20230101_001000_L1000020000	US_20230101_L1000020000	A03	Livestock	32.9146	-111.972	GF5B	20230101	2022-11-16 02:21:44	2022-11-15 18:21:44	2022-11-15 11:21:44	963.712	231.507	0.8
17	GF5B_AHSI_W112.1_N32.8_20230101_001000_L1000020000	US_20230101_L1000020000	A04	Livestock	32.8694	-111.896	GF5B	20230101	2022-11-16 02:21:44	2022-11-15 18:21:44	2022-11-15 11:21:44	2271.22	519.809	0.85

## Sheet: 0928
id	filename	foldername	facility	type	Latitude	Longitude	satellite	date	Time of Satellite	UTC	Local Standard Time	反演结果	不确定度	风速	排放	备注
1	GF5A_AHSI_W102.0_N32.3_20230710_003000_L10000050000	US_20230710_L10000050000	B01	Oil & Gas	32.4345	-101.831	GF5A	20230710	2024-01-15 03:49:58	2024-01-14 19:49:58	2024-01-14 13:49:58	7.75732	0.388086	3.91
2	GF5A_AHSI_W102.0_N32.3_20230710_003000_L10000050000	US_20230710_L10000050000	B02	Oil & Gas	32.401	-101.705	GF5A	20230710	2024-01-15 03:49:58	2024-01-14 19:49:58	2024-01-14 13:49:58	12.1755	0.523625	4.44
3	GF5A_AHSI_W102.0_N32.3_20230710_003000_L10000050000	US_20230710_L10000050000	B03	Oil & Gas	32.3363	-101.704	GF5A	20230710	2024-01-15 03:49:58	2024-01-14 19:49:58	2024-01-14 13:49:58	5.58527	0.277528	4.12
4	GF5A_AHSI_W102.0_N32.3_20230710_003000_L10000050000	US_20230710_L10000050000	B04	Oil & Gas	32.3224	-101.812	GF5A	20230710	2024-01-15 03:49:58	2024-01-14 19:49:58	2024-01-14 13:49:58	11.2955	0.551188	4
5	GF5A_AHSI_W102.0_N32.3_20230710_003000_L10000050000	US_20230710_L10000050000	B05	Oil & Gas	32.2964	-101.836	GF5A	20230710	2024-01-15 03:49:58	2024-01-14 19:49:58	2024-01-14 13:49:58	6.83961	0.348978	4
6	GF5A_AHSI_W102.0_N32.3_20230710_003000_L10000050000	US_20230710_L10000050000	B06	Oil & Gas	32.211	-101.913	GF5A	20230710	2024-01-15 03:49:58	2024-01-14 19:49:58	2024-01-14 13:49:58	6.22013	0.295573	4.1
7	GF5A_AHSI_W102.0_N32.3_20230710_003000_L10000050000	US_20230710_L10000050000	B07	Oil & Gas	32.2622	-101.982	GF5A	20230710	2024-01-15 03:49:58	2024-01-14 19:49:58	2024-01-14 13:49:58	8.0908	0.387861	4.2
8	GF5A_AHSI_W102.0_N32.3_20230710_003000_L10000050000	US_20230710_L10000050000	B08	Oil & Gas	32.326	-101.983	GF5A	20230710	2024-01-15 03:49:58	2024-01-14 19:49:58	2024-01-14 13:49:58	6.08159	0.295515	4.11
9	GF5A_AHSI_W102.0_N32.3_20230710_003000_L10000050000	US_20230710_L10000050000	B09	Oil & Gas	32.2011	-101.963	GF5A	20230710	2024-01-15 03:49:58	2024-01-14 19:49:58	2024-01-14 13:49:58	10.9843	0.500614	4.2
10	GF5A_AHSI_W102.0_N32.3_20230710_003000_L10000050000	US_20230710_L10000050000	B10	Oil & Gas	32.1998	-101.993	GF5A	20230710	2024-01-15 03:49:58	2024-01-14 19:49:58	2024-01-14 13:49:58	4.30277	0.233912	4.2
11	GF5B_AHSI_W111.9_N32.8_20221218_000500_L1000010000	US_20221218_L1000010000	A02	Livestock	32.9161	-111.983	GF5B	20221218	2022-09-19 02:19:41	2022-09-19 18:19:41	2022-09-19 11:19:41	0.75028	0.0946619	1.84
12	GF5B_AHSI_W111.9_N32.8_20221218_000500_L1000010000	US_20221218_L1000010000	A03	Livestock	32.9146	-111.972	GF5B	20221218	2022-09-19 02:19:41	2022-09-19 18:19:41	2022-09-19 11:19:41	0.901489	0.111059	1.84
13	GF5B_AHSI_W111.9_N32.8_20221218_000500_L1000010000	US_20221218_L1000010000	A04	Livestock	32.8694	-111.896	GF5B	20221218	2022-09-19 02:19:41	2022-09-19 18:19:41	2022-09-19 11:19:41	1.60706	0.209089	1.64
14	GF5B_AHSI_W112.1_N32.8_20230101_001000_L1000020000	US_20230101_L1000020000	A01	Solid Waste	33.083	-112.285	GF5B	20230101	2022-11-16 02:21:44	2022-11-15 18:21:44	2022-11-15 11:21:44	3.03725	0.286412	2.21
15	GF5B_AHSI_W112.1_N32.8_20230101_001000_L1000020000	US_20230101_L1000020000	A02	Livestock	32.9161	-111.983	GF5B	20230101	2022-11-16 02:21:44	2022-11-15 18:21:44	2022-11-15 11:21:44	1.16319	0.341597	0.8
16	GF5B_AHSI_W112.1_N32.8_20230101_001000_L1000020000	US_20230101_L1000020000	A03	Livestock	32.9146	-111.972	GF5B	20230101	2022-11-16 02:21:44	2022-11-15 18:21:44	2022-11-15 11:21:44	0.963712	0.285397	0.8
17	GF5B_AHSI_W112.1_N32.8_20230101_001000_L1000020000	US_20230101_L1000020000	A04	Livestock	32.8694	-111.896	GF5B	20230101	2022-11-16 02:21:44	2022-11-15 18:21:44	2022-11-15 11:21:44	2.27122	0.608704	0.85
