# Supplementary material for: Towards global carbon transparency: Spaceborne imaging spectroscopy enables precise CO2 emission quantification at facility scale
Source: Research Square preprint supplement (doi:10.21203/rs.3.rs-5913782/v1), 2025-01-29
Supplement: Supplementary file 11 [file Permian.xlsx]

## Sheet: Sheet1
id	filename	foldername	facility	type	Latitude	Longitude	satellite	date	Time of Satellite	UTC	Local Standard Time	反演结果	不确定度	风速	排放	备注
