# Supplementary material for: Towards global carbon transparency: Spaceborne imaging spectroscopy enables precise CO2 emission quantification at facility scale
Source: Research Square preprint supplement (doi:10.21203/rs.3.rs-5913782/v1), 2025-01-29
Supplement: Supplementary file 12 [file RGB颜色对应.xlsx]

## Sheet: Sheet1
	AHSI	Google
1	110,37,22	166,123,74
2	30,31,33	96,87,57
3	255255255	254231202
4	0,0,5	32,66,44
5	0,82,47	95143103
6	149,86,67	111,99,61
