# Supplementary material for: Towards global carbon transparency: Spaceborne imaging spectroscopy enables precise CO2 emission quantification at facility scale
Source: Research Square preprint supplement (doi:10.21203/rs.3.rs-5913782/v1), 2025-01-29
Supplement: Supplementary file 13 [file 点源坐标.xlsx]

## Sheet: 11月甲烷比赛
id	name	type	lon	lat	country	State	county	Carbonmapper Rate (kg/h)
1	A01	Oil & Gas	-103.18	32.1699	U.S.	Texas	Stanton
2	A02	Oil & Gas	-103.468	32.2019	U.S.	Texas	Stanton
3	A03	Oil & Gas	-103.287	32.5096	U.S.	Texas	Stanton
4	A04	Oil & Gas	-103.494	32.25	U.S.	Texas	Stanton
5	A05	Oil & Gas	-103.477	32.2216	U.S.	Texas	Stanton
6	A06	Oil & Gas	-103.369	32.1847	U.S.	Texas	Stanton
7	A07	Oil & Gas	-102.872	32.2388	U.S.	Texas	Stanton
8	A08	Oil & Gas	-103.443	32.0649	U.S.	Texas	Stanton
9	A09	Oil & Gas	-103.379	32.1348	U.S.	Texas	Stanton
10	B01	Oil & Gas	-101.831	32.4329	U.S.	Texas	Stanton
11	B02	Oil & Gas	-101.705	32.401	U.S.	Texas	Stanton
12	B03	Oil & Gas	-101.704	32.3363	U.S.	Texas	Stanton
13	B04	Oil & Gas	-101.814	32.322	U.S.	Texas	Stanton
14	B05	Oil & Gas	-101.836	32.2963	U.S.	Texas	Stanton
15	B06	Oil & Gas	-101.913	32.211	U.S.	Texas	Stanton
16	B07	Oil & Gas	-101.982	32.2622	U.S.	Texas	Stanton
17	B08	Oil & Gas	-101.983	32.326	U.S.	Texas	Stanton
18	B09	Oil & Gas	-101.963	32.2011	U.S.	Texas	Stanton
19	B10	Oil & Gas	-101.993	32.1998	U.S.	Texas	Stanton
20	B11	Oil & Gas	-102.087	32.2307	U.S.	Texas	Stanton
21	B12	Oil & Gas	-101.753	32.2862	U.S.	Texas	Stanton
22	C01	Oil & Gas	-101.326	32.3646	U.S.	Texas	Stanton
23	C02	Oil & Gas	-101.819	32.3275	U.S.	Texas	Stanton
24	C03	Oil & Gas	-101.705	32.401	U.S.	Texas	Stanton

## Sheet: 9月甲烷比赛
id	name	type	lon	lat	country	State	county	Carbonmapper Rate (kg/h)
1	A01	Solid Waste	-112.285	33.083	U.S.	Arizona	Goodyear	538
2	A02	Livestock	-111.982	32.9192	U.S.	Arizona	Maricopa	234
3	A03	Livestock	-111.972	32.9146	U.S.	Arizona	Stanfield	179
4	A04	Livestock	-111.896	32.8694	U.S.	Arizona	Casa Grande	242
5	B01	Oil & Gas	-101.831	32.4345	U.S.	Texas	Stanton	211
6	B02	Oil & Gas	-101.705	32.401	U.S.	Texas	Stanton
7	B03	Oil & Gas	-101.704	32.3363	U.S.	Texas	Stanton
8	B04	Oil & Gas	-101.812	32.3224	U.S.	Texas	Stanton
9	B05	Oil & Gas	-101.836	32.2964	U.S.	Texas	Stanton
10	B06	Oil & Gas	-101.913	32.211	U.S.	Texas	Stanton
11	B07	Oil & Gas	-101.982	32.2622	U.S.	Texas	Stanton
12	B08	Oil & Gas	-101.983	32.326	U.S.	Texas	Stanton
13	B09	Oil & Gas	-101.963	32.2011	U.S.	Texas	Stanton
14	B10	Oil & Gas	-101.993	32.1998	U.S.	Texas	Stanton
