# Supplementary material for: Towards global carbon transparency: Spaceborne imaging spectroscopy enables precise CO2 emission quantification at facility scale
Source: Research Square preprint supplement (doi:10.21203/rs.3.rs-5913782/v1), 2025-01-29
Supplement: Supplementary file 14 [file CO2_k_v1.xlsx]

## Sheet: k_ZY1E
Wavelength	FWHM	k_Summer_L	k_Summer_M	k_Summer_H	k_Winter_L	k_Winter_M	k_Winter_H	k_1976_L	k_1976_M	k_1976_H
1005.6	16.26	0	0	0	0	0	0	0	0	0
1022.21	16.26	0	0	0	0	0	0	0	0	0
1039.19	16.26	7.75642e-07	7.60839e-07	7.76871e-07	7.94112e-07	8.11767e-07	8.2314e-07	8.00408e-07	7.90149e-07	7.86692e-07
1055.87	16.26	4.23219e-07	4.31381e-07	4.25727e-07	3.83033e-07	4.03608e-07	3.85969e-07	4.10451e-07	4.05329e-07	4.00792e-07
1072.55	16.26	4.68446e-08	5.9651e-08	4.06226e-08	4.70089e-08	4.23478e-08	6.66353e-08	3.84103e-08	4.26815e-08	6.04893e-08
1089.23	16.26	1.92458e-09	0	9.67185e-25	3.25072e-09	0	0	0	5.27081e-09	0
1105.91	16.26	0	0	0	0	0	0	0	0	0
1122.59	16.26	0	0	0	0	0	0	0	0	0
1139.44	16.26	0	0	0	0	0	0	0	0	0
1156.41	16.26	0	0	0	0	0	0	0	0	0
1173.29	16.26	0	0	0	0	0	0	0	0	0
1190.17	16.26	0	0	0	0	0	0	0	0	0
1207.04	16.26	4.26971e-05	4.23763e-05	4.19318e-05	4.39435e-05	4.36274e-05	4.3179e-05	4.3169e-05	4.28487e-05	4.24202e-05
1223.92	16.26	1.88763e-05	1.90582e-05	1.93321e-05	1.91479e-05	1.93205e-05	1.95993e-05	1.89276e-05	1.90729e-05	1.93537e-05
1240.8	16.26	4.64023e-07	4.65147e-07	4.65809e-07	4.45058e-07	4.22726e-07	4.41282e-07	4.48503e-07	4.46517e-07	4.42253e-07
1257.4	16.26	2.04158e-07	2.09753e-07	2.11478e-07	1.95678e-07	1.94837e-07	2.03495e-07	1.95124e-07	1.89632e-07	1.88991e-07
1274.15	16.26	3.79615e-09	0	0	0	5.33278e-09	0	9.68843e-09	0	3.5754e-09
1290.9	16.26	2.11772e-06	2.12448e-06	2.13338e-06	2.12205e-06	2.1328e-06	2.15163e-06	2.11584e-06	2.11708e-06	2.12279e-06
1307.65	16.26	1.85642e-08	1.40535e-08	1.93411e-08	2.53819e-08	3.3373e-08	2.99819e-08	1.21679e-08	3.00732e-08	2.03785e-08
1324.4	16.26	1.46485e-06	1.47243e-06	1.49915e-06	1.32634e-06	1.33866e-06	1.35266e-06	1.37091e-06	1.40134e-06	1.40051e-06
1341.16	16.26	3.58683e-06	3.61496e-06	3.55716e-06	3.69138e-06	3.73451e-06	3.71741e-06	3.61744e-06	3.65008e-06	3.62664e-06
1357.91	16.26	6.33699e-08	1.1329e-08	1.40942e-08	7.55009e-08	1.51329e-08	1.34065e-08	1.09919e-08	5.40006e-09	1.03574e-08
1374.87	16.26	3.03137e-07	2.59136e-07	1.16029e-07	2.85566e-07	2.60868e-07	1.06324e-07	2.86827e-07	2.48547e-07	9.9623e-08
1391.65	16.26	4.78389e-08	1.76371e-08	0	0	1.55674e-09	2.31967e-08	0	1.82585e-08	0
1408.49	16.26	0	0	0	7.81245e-10	0	0	0	0	0
1425.33	16.26	9.2742e-08	1.22685e-07	1.50878e-07	1.23727e-07	9.32008e-08	1.36839e-07	8.11371e-08	1.36432e-07	6.82857e-08
1442.17	16.26	0.000188478	0.000188133	0.000180095	0.000178009	0.000178609	0.000173711	0.000181472	0.000181445	0.000174406
1459.01	16.26	1.03282e-06	1.00752e-06	9.92606e-07	6.96696e-07	6.80796e-07	6.52595e-07	7.79649e-07	7.65618e-07	7.7042e-07
1475.85	16.26	1.326e-05	1.22351e-05	1.07364e-05	1.35574e-05	1.25291e-05	1.10726e-05	1.33857e-05	1.23897e-05	1.08648e-05
1492.7	16.26	2.3408e-06	2.42019e-06	2.58088e-06	2.30283e-06	2.39138e-06	2.51931e-06	2.31451e-06	2.38845e-06	2.54827e-06
1509.54	16.26	4.01634e-08	3.66219e-08	1.89884e-08	2.2045e-08	1.52639e-08	2.67919e-08	1.96818e-08	2.2583e-08	2.29595e-08
1526.38	16.26	5.32443e-06	5.32256e-06	5.33291e-06	4.71087e-06	4.72409e-06	4.72756e-06	4.93624e-06	4.93673e-06	4.94437e-06
1543.22	16.26	2.24329e-05	2.24261e-05	2.24386e-05	2.26659e-05	2.26798e-05	2.26934e-05	2.24673e-05	2.24578e-05	2.24802e-05
1560.06	16.26	3.70169e-07	3.70998e-07	3.76248e-07	3.57678e-07	3.66596e-07	3.5437e-07	3.65346e-07	3.63093e-07	3.65418e-07
1576.9	16.26	0.000181208	0.0001812	0.000181168	0.000186394	0.000186395	0.000186336	0.000183216	0.000183201	0.00018316
1593.71	16.26	8.53169e-06	8.52488e-06	8.53291e-06	7.38842e-06	7.3814e-06	7.38501e-06	7.80928e-06	7.8246e-06	7.825e-06
1610.39	16.26	0.000138547	0.000138523	0.000138461	0.000139386	0.000139384	0.000139323	0.000138387	0.000138373	0.000138327
1627.13	16.26	4.37006e-06	4.37468e-06	4.39288e-06	3.8928e-06	3.89687e-06	3.88658e-06	4.07895e-06	4.0897e-06	4.09117e-06
1644.01	16.26	3.28901e-05	3.28944e-05	3.29242e-05	3.38363e-05	3.38552e-05	3.38869e-05	3.32855e-05	3.33089e-05	3.33314e-05
1660.89	16.26	3.72151e-06	3.71247e-06	3.71247e-06	3.12146e-06	3.1278e-06	3.13372e-06	3.33184e-06	3.33628e-06	3.32833e-06
1677.77	16.26	4.06253e-07	3.84615e-07	3.85262e-07	3.27327e-07	3.47279e-07	3.36037e-07	3.42171e-07	3.688e-07	3.58194e-07
1694.65	16.26	1.41345e-08	2.15066e-08	3.01405e-08	4.20034e-08	4.64203e-09	3.21244e-08	2.75891e-08	1.22735e-08	2.37665e-08
1711.53	16.26	1.42533e-08	1.79002e-08	1.81992e-08	2.1997e-08	2.07593e-08	2.02372e-08	2.39169e-08	2.47495e-08	2.38564e-08
1728.41	16.26	5.32428e-09	5.59063e-09	1.99455e-09	1.3447e-08	0	4.56648e-09	9.12708e-25	5.54764e-09	1.68054e-08
1745.28	16.26	4.30458e-09	0	0	0	0	0	0	0	0
1762.16	16.26	2.08991e-07	2.20844e-07	2.31842e-07	1.50253e-07	1.43198e-07	1.62768e-07	1.92552e-07	1.84783e-07	1.97965e-07
1778.85	16.26	3.7539e-08	6.71256e-09	2.44998e-08	1.09594e-08	0	0	1.10309e-08	5.88629e-09	1.75335e-08
1795.43	16.26	1.41813e-07	1.36567e-07	1.27621e-07	1.17537e-07	1.15857e-07	1.26743e-07	1.20319e-07	9.31497e-08	1.83412e-07
1812.02	16.26	1.731e-08	2.41214e-08	2.63008e-07	1.36944e-08	3.21998e-09	4.17064e-25	3.47536e-08	4.32153e-08	1.01626e-08
1828.82	16.26	0	0	0	0	1.55979e-10	0	0	6.57391e-10	0
1845.62	16.26	0	0	0	0	0	0	0	0	0
1862.42	16.26	1.12991e-08	6.72326e-08	9.64264e-09	4.58063e-09	5.7353e-09	8.41158e-09	4.90934e-09	1.57926e-09	4.14594e-09
1880.13	16.26	5.36379e-05	5.25733e-05	2.46204e-05	5.48862e-05	5.38859e-05	2.05202e-05	5.40784e-05	5.28408e-05	2.28228e-05
1896.11	16.26	5.49704e-06	4.76381e-06	2.22417e-06	4.94777e-06	4.40359e-06	1.69791e-06	5.17068e-06	4.50765e-06	1.82612e-06
1912.97	16.26	9.79862e-07	6.99449e-07	3.21877e-07	8.08963e-07	5.48955e-07	1.85187e-07	7.86294e-07	5.88813e-07	2.63518e-07
1929.93	16.26	2.39672e-06	3.03593e-06	3.49665e-06	1.63942e-06	2.21585e-06	2.8767e-06	1.85328e-06	2.53814e-06	3.04775e-06
1946.82	16.26	0.000579647	0.00063101	0.000681881	0.000528012	0.000581936	0.000648481	0.000548604	0.000600648	0.000658495
1963.72	16.26	0.00106412	0.00103193	0.000991609	0.0010858	0.00105581	0.00101947	0.00107014	0.00103901	0.0009998
1980.61	16.26	0.000129063	0.000128537	0.000125153	0.000119197	0.000119257	0.000117081	0.000123021	0.000122799	0.000120076
1997.51	16.26	0.000555885	0.000560277	0.000568394	0.000529135	0.000533862	0.000542187	0.000540792	0.000545385	0.000553661
2014.4	16.26	0.00235074	0.0023498	0.00234508	0.00232285	0.0023221	0.00231924	0.0023262	0.00232545	0.00232154
2031.3	16.26	0.000416883	0.000415949	0.000414308	0.000371226	0.000370709	0.000369662	0.000389332	0.000388649	0.000387346
2048.13	16.26	0.000589885	0.000591984	0.000595406	0.000586502	0.000588081	0.000590751	0.000585769	0.000587543	0.000590631
2064.9	16.26	0.000777722	0.000778298	0.000779294	0.000795156	0.000795894	0.000797129	0.000783476	0.000784139	0.000785242
2081.61	16.26	0.000380305	0.000379348	0.000377663	0.000343458	0.000342566	0.000340958	0.000358107	0.000357186	0.000355558
2098.45	16.26	9.34986e-05	9.34956e-05	9.34209e-05	8.03445e-05	8.02692e-05	8.01726e-05	8.53927e-05	8.53857e-05	8.52436e-05
2115.29	16.26	2.10365e-05	2.10011e-05	2.0937e-05	1.95196e-05	1.95066e-05	1.94265e-05	1.99103e-05	1.99019e-05	1.98271e-05
2132.13	16.26	2.37791e-06	2.35871e-06	2.36891e-06	1.92936e-06	1.96037e-06	1.95333e-06	2.16514e-06	2.17711e-06	2.1853e-06
2148.97	16.26	1.2115e-05	1.20779e-05	1.19903e-05	1.2272e-05	1.22259e-05	1.21128e-05	1.21349e-05	1.2095e-05	1.19996e-05
2165.81	16.26	1.02816e-05	1.02545e-05	1.0252e-05	1.01757e-05	1.01728e-05	1.016e-05	1.01764e-05	1.01675e-05	1.01538e-05
2182.64	16.26	1.23991e-06	1.25629e-06	1.26998e-06	1.17028e-06	1.1501e-06	1.16783e-06	1.19797e-06	1.1974e-06	1.21141e-06
2199.48	16.26	3.42298e-07	3.65936e-07	3.63425e-07	2.74707e-07	2.68944e-07	2.90226e-07	3.04475e-07	2.80389e-07	3.25611e-07
2216.32	16.26	2.46662e-07	2.38836e-07	2.08868e-07	2.60505e-07	2.24171e-07	2.30037e-07	1.96509e-07	2.78217e-07	2.50865e-07
2233.16	16.26	1.1272e-07	1.15085e-07	7.71216e-08	7.7691e-08	9.55993e-08	7.48031e-08	1.02982e-07	8.61545e-08	7.91868e-08
2250	16.26	1.35961e-07	1.38574e-07	1.3734e-07	1.36261e-07	1.52524e-07	1.39599e-07	1.44143e-07	1.40863e-07	1.33307e-07
2266.84	16.26	4.55775e-08	9.0203e-08	7.46414e-08	7.22245e-08	5.42925e-08	8.51914e-08	5.73725e-08	5.65789e-08	3.8124e-08
2283.67	16.26	3.29975e-08	6.3267e-08	4.92637e-08	1.6468e-08	1.77346e-08	3.27626e-08	4.25084e-08	5.31456e-08	4.80901e-08
2300.51	16.26	1.54278e-08	0	0	2.03185e-08	0	9.22089e-09	1.20329e-08	5.77508e-09	1.02174e-08
2317.35	16.26	0	1.80631e-08	0	6.13588e-09	4.52535e-09	6.48742e-09	0	7.00154e-09	0
2334.19	16.26	0	8.89789e-09	0	0	0	0	0	0	0
2350.4	16.26	0	0	0	0	0	0	0	0	0
2366.68	16.26	0	0	0	0	0	0	5.76284e-09	0	4.152e-09
2384.12	16.26	0	0	2.82272e-09	0	0	0	3.80067e-09	1.91932e-08	1.9958e-08
2400.81	16.26	0	0	5.38092e-09	0	0	0	2.19746e-09	1.46592e-08	4.56281e-09
2417.5	16.26	0	5.04419e-09	0	0	0	1.04756e-08	0	1.393e-08	9.09905e-09
2434.19	16.26	0	7.89328e-09	0	1.34065e-08	0	0	1.17735e-08	5.02763e-09	9.26386e-10
2450.88	16.26	7.75301e-09	0	2.62712e-10	0	1.88941e-08	3.10091e-08	0	8.65553e-09	0
2467.57	16.26	8.21553e-08	3.61636e-08	4.71428e-08	3.95257e-08	2.7715e-08	8.19278e-08	5.95727e-08	2.81309e-08	2.69437e-08
2484.32	16.26	2.94757e-06	2.56521e-06	1.80546e-06	2.271e-06	1.96317e-06	1.40967e-06	2.51561e-06	2.17884e-06	1.53398e-06
2501.08	16.26	1.7851e-06	1.88128e-06	1.91408e-06	1.60503e-06	1.62377e-06	1.72858e-06	1.63979e-06	1.66739e-06	1.71497e-06

## Sheet: k_ZY1F
Wavelength	FWHM	k_Summer_L	k_Summer_M	k_Summer_H	k_Winter_L	k_Winter_M	k_Winter_H	k_1976_L	k_1976_M	k_1976_H
1009.7	16.848	0	0	0	0	0	0	0	0	0
1026.55	16.846	0	0	0	0	0	0	0	0	0
1043.4	16.846	1.2071e-07	1.07274e-07	9.29931e-08	8.4825e-08	9.98524e-08	1.00877e-07	1.02767e-07	1.01767e-07	1.04904e-07
1060.24	16.849	5.90065e-08	4.03792e-08	4.76116e-08	4.53082e-08	2.39436e-08	4.12e-08	2.55503e-08	3.95163e-08	3.27636e-08
1077.09	16.845	2.12404e-08	2.56164e-08	3.23662e-08	2.7289e-08	1.77265e-08	2.21325e-08	1.45565e-08	2.2173e-08	4.56071e-08
1093.94	16.845	3.44919e-09	5.02809e-09	3.68363e-09	0	4.48032e-09	-3.08463e-09	0	4.59921e-09	0
1110.78	16.848	0	0	0	0	0	0	0	0	0
1127.63	16.848	0	0	0	0	0	0	0	0	0
1144.48	16.845	0	0	0	0	0	0	0	0	0
1161.32	16.849	0	0	0	0	0	0	0	0	0
1178.17	16.845	0	0	0	0	0	0	0	0	0
1195.02	16.848	0	0	0	0	0	0	0	0	0
1211.86	16.845	1.13387e-05	1.11397e-05	1.09967e-05	1.06354e-05	1.04527e-05	1.03082e-05	1.08663e-05	1.0672e-05	1.05366e-05
1228.71	16.848	4.55444e-06	4.55038e-06	4.53893e-06	3.98745e-06	3.99136e-06	3.98467e-06	4.18075e-06	4.17125e-06	4.14544e-06
1245.56	16.848	5.67292e-08	4.50458e-08	5.69493e-08	4.96975e-08	5.09596e-08	4.34507e-08	4.03418e-08	4.88284e-08	4.34722e-08
1262.4	16.846	2.82485e-07	2.75632e-07	2.71539e-07	2.76478e-07	2.85715e-07	2.83921e-07	2.76932e-07	2.78739e-07	2.6286e-07
1279.25	16.845	0	0	0	0	5.22157e-09	0	0	0	0
1296.09	16.849	1.46865e-06	1.46325e-06	1.47398e-06	1.49321e-06	1.4991e-06	1.50166e-06	1.48332e-06	1.48159e-06	1.48555e-06
1312.94	16.845	5.77039e-06	5.71681e-06	5.60851e-06	5.8233e-06	5.78777e-06	5.67618e-06	5.7712e-06	5.73037e-06	5.61973e-06
1329.79	16.846	5.34933e-08	6.9406e-08	3.96327e-08	2.92281e-08	2.41861e-08	2.12763e-08	3.59424e-08	4.49295e-08	4.0291e-08
1346.63	16.848	1.63326e-06	1.86969e-06	2.2588e-06	1.53779e-06	1.84713e-06	2.16438e-06	1.57052e-06	1.84669e-06	2.17041e-06
1363.48	16.848	6.84622e-09	7.13418e-08	0	1.11093e-07	1.52182e-08	6.37068e-09	1.33217e-08	9.24463e-09	1.8231e-08
1380.33	16.845	9.11041e-08	1.2006e-07	3.49702e-08	9.93192e-08	1.19762e-07	1.94469e-08	1.2252e-07	1.15768e-07	2.68471e-08
1397.17	16.848	0	0	0	1.34626e-09	0	0	0	0	0
1414.02	16.848	0	0	-2.33941e-09	0	0	0	0	0	0
1430.87	16.845	0.000181115	0.000151189	0.000120139	0.000188192	0.000159727	0.000128212	0.000184707	0.000155557	0.000123709
1447.71	16.846	6.05386e-05	6.19732e-05	6.04545e-05	5.19465e-05	5.37911e-05	5.31389e-05	5.52726e-05	5.6899e-05	5.57693e-05
1464.56	16.846	1.32066e-07	1.10598e-07	8.90566e-08	6.47524e-08	1.06733e-07	5.67982e-08	8.24134e-08	6.22172e-08	1.08129e-07
1481.41	16.846	6.37605e-06	6.11851e-06	5.91887e-06	6.22027e-06	5.94329e-06	5.6848e-06	6.26571e-06	5.97897e-06	5.78779e-06
1498.25	16.849	2.9678e-06	2.96247e-06	2.98572e-06	2.96017e-06	2.96801e-06	2.96758e-06	2.95119e-06	2.9445e-06	2.95841e-06
1515.1	16.844	3.30272e-08	4.84256e-08	3.02004e-08	3.64111e-08	2.39428e-08	2.5733e-08	1.4069e-08	2.66853e-08	2.23978e-08
1531.94	16.848	2.76621e-05	2.77701e-05	2.80016e-05	2.73694e-05	2.74555e-05	2.7636e-05	2.73441e-05	2.74412e-05	2.76447e-05
1548.79	16.848	2.83868e-06	2.80688e-06	2.79512e-06	2.55064e-06	2.55087e-06	2.52646e-06	2.64795e-06	2.63293e-06	2.62702e-06
1565.64	16.846	3.84094e-05	3.84418e-05	3.84845e-05	3.52514e-05	3.52802e-05	3.53326e-05	3.64522e-05	3.64744e-05	3.65141e-05
1582.49	16.845	9.59272e-05	9.58755e-05	9.5798e-05	9.46863e-05	9.46386e-05	9.45808e-05	9.47524e-05	9.47252e-05	9.46439e-05
1599.33	16.848	0.000119952	0.000120038	0.000120275	0.000120895	0.000121002	0.000121228	0.000119945	0.00012004	0.000120277
1616.18	16.846	5.65207e-05	5.65448e-05	5.65597e-05	5.22677e-05	5.22996e-05	5.23282e-05	5.38323e-05	5.38291e-05	5.38876e-05
1633.03	16.846	5.07959e-06	5.09508e-06	5.09928e-06	4.93752e-06	4.95344e-06	4.93287e-06	4.96833e-06	4.97598e-06	4.98933e-06
1649.87	16.848	2.44412e-05	2.44508e-05	2.44611e-05	2.48542e-05	2.48627e-05	2.48724e-05	2.45923e-05	2.46021e-05	2.46015e-05
1666.72	16.845	2.34676e-06	2.34317e-06	2.35577e-06	1.92395e-06	1.9247e-06	1.93461e-06	2.09491e-06	2.09526e-06	2.10393e-06
1683.56	16.849	1.87452e-07	1.67122e-07	1.81397e-07	1.71673e-07	1.64296e-07	1.60599e-07	1.72459e-07	1.5853e-07	1.58297e-07
1700.41	16.845	1.34228e-08	1.76159e-08	1.65921e-08	2.75185e-08	1.3848e-08	9.42771e-09	1.82023e-08	1.60855e-08	2.16846e-08
1717.26	16.846	2.3396e-08	1.5004e-08	2.69657e-08	2.06453e-08	2.98555e-24	1.6806e-08	9.10603e-09	1.98321e-09	1.67352e-08
1734.1	16.849	0	1.00066e-08	5.86151e-09	0	0	0	2.20033e-24	0	0
1750.95	16.845	1.61339e-07	1.64197e-07	1.59957e-07	1.14979e-07	1.11212e-07	1.11924e-07	1.34391e-07	1.33049e-07	1.39838e-07
1767.8	16.845	1.48088e-07	1.55753e-07	1.80425e-07	1.0418e-07	9.49267e-08	8.65287e-08	9.8793e-08	1.10298e-07	8.8688e-08
1784.64	16.849	1.76714e-07	1.80268e-07	1.50854e-07	1.18499e-07	1.3238e-07	1.10834e-07	1.41525e-07	1.36011e-07	1.50168e-07
1801.49	16.845	8.93965e-08	9.66159e-08	1.45212e-07	6.68803e-08	4.88453e-08	5.25492e-08	9.24662e-08	1.00955e-07	5.50496e-08
1818.34	16.846	3.90445e-08	7.14376e-10	9.68518e-09	1.86522e-08	0	1.25837e-23	3.18408e-08	7.02783e-08	0
1835.18	16.849	0	0	0	0	0	0	0	0	0
1852.03	16.846	0	0	0	0	0	0	0	0	0
1868.88	16.845	8.41709e-07	4.10887e-07	7.74869e-07	8.04925e-07	2.70466e-07	6.39877e-07	7.32181e-07	3.38643e-07	6.69145e-07
1885.72	16.848	3.81347e-05	3.45151e-05	1.94197e-05	3.82411e-05	3.42962e-05	1.66791e-05	3.80365e-05	3.41901e-05	1.80299e-05
1902.57	16.845	2.17444e-06	2.42608e-06	7.35998e-07	1.85866e-06	2.05806e-06	5.60293e-07	1.85082e-06	2.17435e-06	6.72719e-07
1919.41	16.848	7.36609e-07	6.31671e-07	3.62435e-07	5.05948e-07	4.71742e-07	2.04687e-07	5.98579e-07	5.35306e-07	2.53245e-07
1936.26	16.849	5.7309e-05	8.59154e-05	0.000131515	4.26125e-05	6.25618e-05	9.76159e-05	4.84427e-05	7.17747e-05	0.000111128
1953.11	16.845	0.00111276	0.00111278	0.00108275	0.00107635	0.0010892	0.00108988	0.00108821	0.00109442	0.00107801
1969.96	16.845	0.000643124	0.000630475	0.000614351	0.000642276	0.000630983	0.000617588	0.00063989	0.000628008	0.000612804
1986.8	16.846	5.65104e-05	5.57643e-05	5.43903e-05	4.96e-05	4.89635e-05	4.78902e-05	5.22121e-05	5.15399e-05	5.02746e-05
2003.65	16.846	0.00197301	0.00199167	0.00201075	0.00190983	0.0019318	0.00195578	0.00193455	0.00195475	0.00197622
2020.49	16.848	0.00128621	0.00128002	0.00126847	0.00119799	0.00119143	0.00117974	0.00123297	0.00122641	0.00121468
2037.34	16.846	0.000309923	0.000309241	0.0003083	0.000291943	0.000291401	0.000290525	0.00029817	0.000297531	0.000296629
2054.19	16.848	0.00082783	0.000827148	0.000825498	0.000846308	0.000845884	0.000844796	0.000834454	0.000833868	0.000832433
2071.03	16.845	0.00071637	0.000715866	0.000714777	0.000696833	0.00069643	0.000695469	0.000702556	0.00070212	0.000701102
2087.88	16.846	0.000266468	0.000266365	0.00026615	0.000233412	0.000233387	0.000233349	0.000246534	0.000246478	0.000246353
2104.73	16.846	4.5673e-05	4.54318e-05	4.50323e-05	4.07619e-05	4.05043e-05	4.00958e-05	4.24822e-05	4.22391e-05	4.18305e-05
2121.57	16.849	9.96614e-06	9.97156e-06	9.95767e-06	8.77822e-06	8.80748e-06	8.8033e-06	9.19645e-06	9.23453e-06	9.22936e-06
2138.42	16.845	3.14329e-06	3.12617e-06	3.13389e-06	2.87325e-06	2.89374e-06	2.87786e-06	2.95463e-06	2.95413e-06	2.97042e-06
2155.27	16.848	1.40369e-05	1.40144e-05	1.39703e-05	1.43548e-05	1.43462e-05	1.42998e-05	1.41517e-05	1.41199e-05	1.40875e-05
2172.11	16.846	5.90426e-06	5.91106e-06	5.91068e-06	5.70881e-06	5.70115e-06	5.69488e-06	5.7973e-06	5.78176e-06	5.78037e-06
2188.96	16.846	7.43773e-07	7.7645e-07	7.85291e-07	6.94395e-07	6.8558e-07	6.84398e-07	7.20327e-07	6.92822e-07	7.40403e-07
2205.81	16.845	1.98601e-07	1.98027e-07	2.12953e-07	1.86001e-07	1.65644e-07	1.90908e-07	1.77223e-07	2.03376e-07	2.06933e-07
2222.65	16.85	1.92514e-07	2.23372e-07	1.65268e-07	1.81533e-07	1.81736e-07	1.7764e-07	1.70789e-07	2.14713e-07	1.90297e-07
2239.5	16.846	6.82465e-08	4.42633e-08	4.65421e-08	3.80207e-08	6.60304e-08	4.6334e-08	4.90128e-08	4.57881e-08	2.55795e-08
2256.35	16.845	1.42916e-07	1.63899e-07	1.40688e-07	1.5539e-07	1.5944e-07	1.59361e-07	1.56712e-07	1.4093e-07	1.61549e-07
2273.19	16.846	4.94913e-08	8.95216e-08	6.55094e-08	4.93949e-08	2.60984e-08	5.49421e-08	6.18775e-08	5.93441e-08	6.8189e-08
2290.04	16.848	2.30474e-08	6.7308e-09	3.06787e-08	2.51344e-08	6.45031e-09	2.01189e-08	3.88226e-08	0	5.34172e-08
2306.89	16.845	0	0	6.84951e-25	1.7164e-08	1.00461e-08	1.11199e-08	0	0	2.10892e-08
2323.73	16.848	0	0	0	0	6.73194e-09	0	0	0	6.21228e-09
2340.58	16.846	3.18924e-09	0	0	0	0	0	0	0	0
2357.43	16.848	2.67481e-09	0	0	0	0	0	5.64586e-09	0	0
2374.27	16.846	0	2.65576e-08	0	0	0	0	0	0	0
2391.12	16.845	0	0	1.02012e-09	0	0	0	0	0	0
2407.96	16.848	0	0	1.07925e-09	9.43961e-09	0	1.48785e-08	9.50882e-09	0	1.09039e-10
2424.81	16.848	0	2.77538e-24	1.70704e-09	1.18998e-08	0	8.13967e-09	0	2.20795e-10	1.63613e-08
2441.66	16.845	1.18156e-08	4.26916e-26	0	1.46832e-08	0	2.42585e-08	1.88014e-08	1.28258e-08	1.06352e-08
2458.5	16.849	1.55545e-08	4.98443e-08	1.95598e-08	0	7.69868e-09	4.10497e-08	3.03733e-08	4.43998e-08	0
2475.35	16.845	7.78513e-07	5.99473e-07	2.76047e-07	5.94059e-07	3.90844e-07	3.01603e-07	6.21883e-07	4.91564e-07	2.13962e-07
2492.2	16.846	3.23971e-06	3.1967e-06	3.28996e-06	2.67773e-06	2.64937e-06	2.66542e-06	2.84018e-06	2.84989e-06	2.84376e-06
2509.04	16.849	1.54251e-06	1.51697e-06	1.60529e-06	1.35548e-06	1.44152e-06	1.45201e-06	1.48776e-06	1.41976e-06	1.46824e-06

## Sheet: k_GF5B
Wavelength	FWHM	k_Summer_L	k_Summer_M	k_Summer_H	k_Winter_L	k_Winter_M	k_Winter_H	k_1976_L	k_1976_M	k_1976_H
1009	8.546	0	0	0	0	0	0	0	0	0
1017.42	8.546	0	0	0	0	0	0	0	0	0
1025.83	8.546	0	0	0	0	0	0	0	0	0
1034.25	8.546	2.59586e-07	2.60437e-07	2.58484e-07	2.60163e-07	2.57914e-07	2.65295e-07	2.60311e-07	2.57487e-07	2.61747e-07
1042.67	8.546	2.66785e-07	2.55177e-07	2.48252e-07	2.42728e-07	2.58683e-07	2.60742e-07	2.567e-07	2.57231e-07	2.58663e-07
1051.08	8.546	1.79281e-06	1.7946e-06	1.79462e-06	1.85061e-06	1.85532e-06	1.84488e-06	1.79676e-06	1.80274e-06	1.80269e-06
1059.5	8.546	8.74316e-08	7.65392e-08	7.20449e-08	7.8488e-08	5.597e-08	6.61605e-08	6.8512e-08	7.21289e-08	6.54815e-08
1067.92	8.546	2.0703e-07	1.99041e-07	1.89819e-07	1.97559e-07	1.9419e-07	2.08492e-07	2.00104e-07	1.92031e-07	1.92815e-07
1076.33	8.546	3.19859e-08	3.20525e-08	3.27227e-08	2.86306e-08	2.23233e-08	3.0419e-08	3.09162e-08	2.52599e-08	4.25972e-08
1084.75	8.546	2.30981e-24	1.46233e-24	0	0	0	0	0	2.21962e-09	0
1093.17	8.546	2.65106e-09	3.20049e-09	2.7623e-09	0	2.90076e-09	-2.28989e-09	1.22014e-09	3.23898e-09	0
1101.58	8.546	0	0	0	0	0	0	0	0	0
1110	8.546	0	0	0	0	0	4.03687e-25	0	0	0
1118.42	8.546	0	0	9.28352e-09	5.18435e-09	0	0	0	0	0
1126.83	8.546	0	0	0	0	0	0	0	0	0
1135.25	8.546	0	0	0	1.31378e-09	0	0	0	0	0
1143.67	8.546	0	0	0	0	0	0	0	0	0
1152.08	8.546	0	0	0	0	0	0	0	0	0
1160.5	8.546	0	0	0	0	0	0	0	0	0
1168.92	8.546	0	0	0	0	0	0	0	0	0
1177.33	8.546	0	0	0	0	0	0	0	2.40909e-09	0
1185.75	8.546	0	0	0	0	0	0	0	0	0
1194.17	8.546	0	0	0	0	0	0	1.22525e-09	0	0
1202.58	8.546	2.60374e-05	2.54445e-05	2.49706e-05	2.64492e-05	2.58486e-05	2.54052e-05	2.6165e-05	2.55645e-05	2.51199e-05
1211	8.546	1.7348e-05	1.70771e-05	1.68168e-05	1.70422e-05	1.6796e-05	1.65384e-05	1.70669e-05	1.6803e-05	1.65504e-05
1219.42	8.546	2.59187e-05	2.61037e-05	2.63673e-05	2.65252e-05	2.67079e-05	2.70104e-05	2.61394e-05	2.63327e-05	2.66082e-05
1227.83	8.546	6.84962e-06	6.86802e-06	6.89275e-06	6.3827e-06	6.4001e-06	6.41814e-06	6.53038e-06	6.54016e-06	6.54711e-06
1236.25	8.546	1.15696e-06	1.15787e-06	1.15735e-06	1.09792e-06	1.10317e-06	1.10136e-06	1.13316e-06	1.13138e-06	1.1309e-06
1244.67	8.546	1.15519e-07	1.01734e-07	1.10989e-07	1.02264e-07	9.74037e-08	9.36144e-08	9.445e-08	1.03777e-07	9.90474e-08
1253.08	8.546	2.21666e-07	2.18593e-07	2.24606e-07	2.20841e-07	2.29712e-07	2.21539e-07	2.29845e-07	2.16764e-07	2.14425e-07
1261.5	8.546	2.58295e-07	2.50286e-07	2.5356e-07	2.47686e-07	2.50779e-07	2.65858e-07	2.55131e-07	2.53194e-07	2.38903e-07
1269.92	8.546	6.76724e-08	7.60963e-08	6.90486e-08	7.66414e-08	7.05224e-08	7.65262e-08	7.39381e-08	6.33874e-08	5.96523e-08
1278.33	8.546	0	0	1.82219e-09	1.81495e-09	4.12302e-09	0	0	0	1.35406e-09
1286.75	8.546	9.05244e-07	8.94496e-07	8.9894e-07	8.6283e-07	8.56846e-07	8.68371e-07	8.69168e-07	8.60117e-07	8.59055e-07
1295.17	8.546	1.83477e-06	1.83357e-06	1.84948e-06	1.87983e-06	1.88367e-06	1.89101e-06	1.85597e-06	1.85473e-06	1.86571e-06
1303.58	8.546	4.2383e-08	4.47765e-08	4.90609e-08	4.79506e-08	2.84045e-08	2.89997e-08	4.49586e-08	3.28662e-08	5.06325e-08
1312	8.546	3.93286e-06	3.84902e-06	3.69402e-06	3.95257e-06	3.87171e-06	3.72624e-06	3.92911e-06	3.8447e-06	3.6972e-06
1320.42	8.546	5.39273e-06	5.42769e-06	5.47799e-06	5.4281e-06	5.4902e-06	5.54765e-06	5.37733e-06	5.43161e-06	5.47771e-06
1328.83	8.546	1.48117e-07	1.72707e-07	1.42011e-07	1.05307e-07	1.08754e-07	1.20276e-07	1.15164e-07	1.37539e-07	1.29289e-07
1337.25	8.546	2.61254e-06	2.57194e-06	2.4784e-06	2.64628e-06	2.62371e-06	2.52679e-06	2.61637e-06	2.57543e-06	2.48802e-06
1345.66	8.546	2.08686e-06	2.39097e-06	2.79193e-06	2.04234e-06	2.4267e-06	2.81081e-06	2.04962e-06	2.39088e-06	2.76047e-06
1354.08	8.546	1.84091e-07	6.2183e-08	8.56294e-08	1.36144e-07	1.7032e-07	1.56847e-07	1.63204e-07	2.40418e-07	1.10293e-07
1362.5	8.546	9.92704e-09	6.85376e-08	1.92911e-09	1.01643e-07	1.65109e-08	5.36803e-09	1.05991e-08	3.42618e-08	1.28809e-08
1370.91	8.546	3.24653e-07	2.11393e-07	9.44289e-08	2.64823e-07	2.07771e-07	7.99028e-08	3.12777e-07	2.29435e-07	6.133e-08
1379.33	8.546	1.67294e-07	1.68376e-07	6.66224e-08	1.80287e-07	1.78034e-07	4.37256e-08	1.84962e-07	1.73971e-07	4.76033e-08
1387.75	8.546	1.45835e-08	1.94265e-09	1.24263e-09	0	-7.78358e-11	0	3.17455e-08	2.1589e-09	-2.73376e-09
1396.16	8.546	0	0	0	8.89862e-09	0	0	0	0	0
1404.58	8.546	0	0	0	1.78019e-08	0	0	0	0	7.34041e-09
1413	8.546	0	0	-2.44099e-09	0	0	3.47814e-09	0	0	0
1421.41	8.546	2.73092e-08	3.57595e-08	7.92887e-09	1.44515e-08	4.35026e-08	1.90842e-08	1.23044e-08	3.04122e-08	1.39205e-08
1429.83	8.546	0.00014096	0.000117432	9.37299e-05	0.000145557	0.000122314	9.73259e-05	0.000143333	0.000119982	9.52964e-05
1438.25	8.546	0.000265362	0.000261864	0.000244001	0.0002663	0.000263352	0.000249263	0.000264365	0.000260974	0.000244119
1446.66	8.546	7.25755e-05	7.07163e-05	6.56247e-05	6.42232e-05	6.29635e-05	5.89495e-05	6.74091e-05	6.58532e-05	6.12159e-05
1455.08	8.546	4.47551e-06	4.06532e-06	3.60014e-06	3.24232e-06	2.95817e-06	2.60562e-06	3.64955e-06	3.3266e-06	2.94916e-06
1463.5	8.546	2.51883e-07	2.46281e-07	2.4234e-07	1.444e-07	1.91327e-07	1.57122e-07	1.74142e-07	1.75233e-07	2.08567e-07
1471.91	8.546	9.96713e-06	9.31225e-06	7.94756e-06	1.01958e-05	9.61879e-06	8.3056e-06	1.00401e-05	9.45307e-06	8.12586e-06
1480.33	8.546	7.17611e-06	6.91717e-06	6.62704e-06	7.1317e-06	6.8729e-06	6.55443e-06	7.12434e-06	6.85715e-06	6.57892e-06
1488.75	8.546	1.48989e-06	1.46319e-06	1.45489e-06	1.33092e-06	1.3314e-06	1.32229e-06	1.40755e-06	1.38519e-06	1.38614e-06
1497.16	8.546	3.11669e-06	3.15637e-06	3.24124e-06	3.09241e-06	3.13606e-06	3.20697e-06	3.09081e-06	3.12798e-06	3.20853e-06
1505.58	8.546	2.19934e-07	2.12504e-07	2.13116e-07	1.98742e-07	1.98131e-07	2.04319e-07	2.04494e-07	2.00074e-07	2.22822e-07
1514	8.546	2.71546e-08	4.2206e-08	2.83324e-08	2.91423e-08	2.00387e-08	2.23008e-08	1.50026e-08	2.70078e-08	2.45429e-08
1522.41	8.546	1.83809e-06	1.84228e-06	1.85495e-06	1.53593e-06	1.53973e-06	1.54986e-06	1.62968e-06	1.65257e-06	1.6607e-06
1530.83	8.546	2.1805e-05	2.1921e-05	2.21745e-05	2.12747e-05	2.13744e-05	2.15715e-05	2.13897e-05	2.15012e-05	2.17254e-05
1539.25	8.546	3.32739e-05	3.32658e-05	3.32667e-05	3.41873e-05	3.41949e-05	3.41842e-05	3.36289e-05	3.36208e-05	3.36278e-05
1547.66	8.546	6.19975e-06	6.16705e-06	6.1529e-06	5.92669e-06	5.9273e-06	5.90394e-06	6.00334e-06	5.98681e-06	5.97787e-06
1556.08	8.546	3.35357e-07	3.29285e-07	3.40436e-07	3.18737e-07	3.17854e-07	3.13823e-07	3.179e-07	3.23063e-07	3.27405e-07
1564.5	8.546	2.40701e-05	2.40883e-05	2.41163e-05	2.22911e-05	2.23103e-05	2.23423e-05	2.29605e-05	2.29719e-05	2.29946e-05
1572.91	8.546	0.000188376	0.000188412	0.000188449	0.000190641	0.000190648	0.000190709	0.000188722	0.000188749	0.000188792
1581.33	8.546	0.000115491	0.000115441	0.000115359	0.00011534	0.000115293	0.000115223	0.00011484	0.000114805	0.000114718
1589.75	8.546	8.8769e-06	8.86687e-06	8.84503e-06	7.76165e-06	7.74744e-06	7.73569e-06	8.17477e-06	8.18253e-06	8.16291e-06
1598.16	8.546	9.03196e-05	9.03796e-05	9.05511e-05	8.99013e-05	8.99728e-05	9.01295e-05	8.96814e-05	8.97471e-05	8.99143e-05
1606.58	8.546	0.000176004	0.000175993	0.000175947	0.000181584	0.000181585	0.000181549	0.000178325	0.000178298	0.000178277
1615	8.546	7.62139e-05	7.62251e-05	7.62092e-05	7.24179e-05	7.24392e-05	7.24366e-05	7.36964e-05	7.36767e-05	7.37072e-05
1623.41	8.546	8.63481e-06	8.64763e-06	8.63882e-06	7.00755e-06	7.01609e-06	7.00686e-06	7.67623e-06	7.67784e-06	7.67399e-06
1631.83	8.546	4.75384e-06	4.76576e-06	4.76399e-06	4.62407e-06	4.63495e-06	4.61596e-06	4.65543e-06	4.66246e-06	4.66758e-06
1640.25	8.546	2.58498e-05	2.58638e-05	2.58429e-05	2.60081e-05	2.60147e-05	2.60003e-05	2.58239e-05	2.58308e-05	2.58266e-05
1648.66	8.546	2.83187e-05	2.83381e-05	2.83601e-05	2.91157e-05	2.91279e-05	2.91492e-05	2.86686e-05	2.86816e-05	2.86937e-05
1657.08	8.546	8.09314e-06	8.09679e-06	8.0615e-06	7.42112e-06	7.41253e-06	7.40502e-06	7.64253e-06	7.65009e-06	7.63866e-06
1665.5	8.546	2.6163e-06	2.61287e-06	2.61866e-06	2.14415e-06	2.14388e-06	2.15403e-06	2.32992e-06	2.33571e-06	2.33946e-06
1673.91	8.546	7.84728e-07	7.74894e-07	7.87311e-07	6.47628e-07	6.62229e-07	6.59128e-07	7.0137e-07	7.08158e-07	7.20354e-07
1682.33	8.546	2.22037e-07	1.98542e-07	2.1161e-07	1.92395e-07	1.89263e-07	1.87327e-07	1.9998e-07	1.90261e-07	1.92464e-07
1690.75	8.546	5.81825e-08	6.1431e-08	6.25783e-08	7.22825e-08	4.57535e-08	6.33554e-08	7.48026e-08	4.92515e-08	5.02715e-08
1699.16	8.546	1.40113e-08	1.85617e-08	1.27641e-08	2.83913e-08	1.14694e-08	7.92683e-09	1.92087e-08	1.59881e-08	1.95264e-08
1707.58	8.546	2.99801e-08	1.42285e-08	2.98485e-08	1.76009e-08	1.56368e-08	1.52575e-08	2.11767e-08	4.46447e-08	4.1443e-08
1716	8.546	2.90968e-08	1.33258e-08	2.17585e-08	1.49399e-08	3.09925e-09	1.51378e-08	1.14113e-08	1.0498e-08	1.94364e-08
1724.41	8.546	2.43952e-08	1.3882e-08	2.43598e-08	1.94236e-08	9.61988e-25	9.45231e-09	6.49779e-09	0	1.01247e-08
1732.83	8.546	2.88499e-09	1.13011e-08	4.98244e-09	2.49925e-10	0	0	3.14903e-10	0	2.8223e-25
1741.25	8.546	0	7.6992e-09	6.19966e-09	0	0	0	0	0	0
1749.66	8.546	8.92788e-08	9.2094e-08	9.00656e-08	6.21594e-08	6.17735e-08	6.2301e-08	7.39125e-08	7.41653e-08	7.84736e-08
1758.08	8.546	2.74199e-07	2.86529e-07	2.9029e-07	1.95883e-07	1.96298e-07	1.85483e-07	2.24699e-07	2.33312e-07	2.41285e-07
1766.5	8.546	1.73041e-07	1.73678e-07	2.08289e-07	1.15153e-07	1.08093e-07	1.01626e-07	1.15747e-07	1.26607e-07	1.10216e-07
1774.91	8.546	3.88467e-08	3.76045e-08	6.10894e-08	3.25617e-08	2.5858e-08	9.35879e-09	9.62571e-09	2.17094e-08	2.83186e-08
1783.33	8.546	1.31237e-07	1.36817e-07	1.0899e-07	8.92902e-08	9.95569e-08	7.86296e-08	1.05311e-07	9.83389e-08	1.22595e-07
1791.75	8.546	2.28923e-07	2.06446e-07	2.74248e-07	1.45639e-07	1.56398e-07	1.46485e-07	1.84311e-07	1.55046e-07	1.64846e-07
1800.16	8.546	1.11251e-07	1.04122e-07	1.66787e-07	7.88747e-08	4.35864e-08	6.13643e-08	1.0121e-07	9.50347e-08	7.65426e-08
1808.58	8.546	3.95618e-08	3.42614e-08	1.00157e-07	1.39661e-08	5.9885e-08	4.50027e-10	3.32298e-08	6.31936e-08	2.13253e-08
1817	8.546	4.53168e-08	5.78457e-10	5.35648e-09	2.41653e-08	2.38465e-09	6.33798e-24	3.90341e-08	7.64714e-08	1.01386e-25
1825.41	8.546	1.57263e-11	1.62035e-09	1.69178e-08	1.30729e-09	0	0	1.30992e-09	0	0
1833.83	8.546	0	0	1.69465e-09	0	0	0	0	0	0
1842.25	8.546	0	0	0	0	0	0	0	0	0
1850.66	8.546	0	0	0	0	0	0	0	0	0
1859.08	8.546	3.06644e-09	1.09898e-10	1.18811e-08	7.05622e-08	5.42281e-09	1.15318e-08	1.03874e-09	6.85284e-11	2.66819e-09
1867.5	8.546	2.82808e-07	1.42703e-07	3.15621e-07	3.84802e-07	9.55959e-08	2.83779e-07	2.38024e-07	1.17227e-07	2.44491e-07
1875.91	8.546	4.06003e-05	3.68827e-05	1.44558e-05	4.20464e-05	3.82119e-05	1.13817e-05	4.11799e-05	3.72615e-05	1.31976e-05
1884.33	8.546	4.53688e-05	4.11686e-05	2.29953e-05	4.54874e-05	4.08935e-05	1.96524e-05	4.5233e-05	4.0795e-05	2.13336e-05
1892.75	8.546	9.48781e-06	8.90753e-06	4.71793e-06	8.99025e-06	8.699e-06	4.04489e-06	9.12294e-06	8.652e-06	4.30425e-06
1901.16	8.546	2.34451e-06	2.4938e-06	7.14293e-07	2.03665e-06	2.12857e-06	5.31217e-07	2.04128e-06	2.23805e-06	6.0188e-07
1909.58	8.546	1.31103e-06	9.79124e-07	2.3972e-07	1.06717e-06	8.19748e-07	1.77861e-07	1.0201e-06	8.8759e-07	3.14469e-07
1918	8.546	7.6648e-07	6.3303e-07	3.55481e-07	5.44179e-07	4.50624e-07	1.99239e-07	6.11965e-07	5.51876e-07	2.55909e-07
1926.41	8.546	8.37067e-07	9.14665e-07	9.20337e-07	5.86569e-07	6.9128e-07	7.50065e-07	6.69903e-07	7.39115e-07	7.54642e-07
1934.83	8.546	2.37181e-05	3.21991e-05	5.04528e-05	1.75541e-05	2.38165e-05	3.83005e-05	1.99e-05	2.69751e-05	4.28323e-05
1943.25	8.546	0.000318217	0.000354493	0.000383455	0.00027462	0.0003072	0.000341583	0.000292243	0.00032591	0.000356802
1951.66	8.546	0.0010329	0.00104976	0.00103912	0.000989522	0.00101902	0.00103933	0.00100495	0.00102783	0.00103124
1960.08	8.546	0.00120934	0.00116893	0.00111158	0.00122903	0.00119319	0.00114503	0.0012133	0.00117514	0.00112059
1968.5	8.546	0.00080288	0.000794406	0.000782485	0.000809887	0.000802868	0.000793542	0.000802848	0.000795117	0.000784042
1976.91	8.546	0.000227624	0.000227072	0.000223097	0.000215177	0.000215397	0.000213256	0.000219882	0.000219747	0.000216721
1985.33	8.546	5.54486e-05	5.46571e-05	5.3311e-05	4.91192e-05	4.84378e-05	4.73285e-05	5.15416e-05	5.08202e-05	4.95542e-05
1993.75	8.546	0.000229611	0.000229157	0.000229576	0.000215374	0.000215232	0.000215948	0.000220987	0.000220739	0.000221313
2002.16	8.546	0.00176177	0.00176552	0.00177316	0.00170201	0.0017075	0.00171739	0.00172655	0.00173113	0.00173981
2010.58	8.546	0.00280118	0.00278606	0.00276138	0.00283742	0.00282363	0.00280167	0.00280933	0.00279496	0.00277137
2019	8.546	0.00167618	0.00166828	0.0016536	0.00160157	0.0015932	0.00157842	0.00162892	0.00162061	0.0016058
2027.41	8.546	0.000583334	0.000585162	0.000587565	0.000513545	0.000514867	0.000516462	0.000541797	0.000543316	0.000545329
2035.83	8.546	0.000305065	0.000303942	0.000302361	0.000283084	0.000282298	0.000281041	0.000291011	0.000290045	0.000288637
2044.25	8.546	0.000391098	0.000392307	0.000394551	0.000384035	0.000384891	0.000386509	0.000385477	0.000386501	0.000388464
2052.66	8.546	0.000908588	0.000907811	0.000906181	0.000923335	0.000922587	0.000921115	0.000912908	0.000912127	0.000910564
2061.08	8.546	0.00076491	0.000766064	0.000767846	0.000799756	0.000801395	0.000804125	0.000780237	0.00078159	0.000783744
2069.49	8.546	0.000769254	0.000769124	0.00076879	0.000755933	0.000755759	0.000755353	0.000758379	0.00075825	0.000757911
2077.91	8.546	0.000458621	0.000457149	0.000454498	0.000422272	0.00042091	0.000418405	0.00043666	0.000435246	0.000432696
2086.33	8.546	0.00030735	0.000307102	0.000306639	0.000270735	0.000270567	0.000270275	0.000285297	0.000285089	0.000284729
2094.74	8.546	0.000144413	0.000144648	0.000144935	0.000123088	0.000123248	0.000123504	0.000131466	0.000131671	0.000131906
2103.16	8.546	5.06913e-05	5.04127e-05	4.99686e-05	4.4782e-05	4.4491e-05	4.4032e-05	4.68863e-05	4.66265e-05	4.61495e-05
2111.58	8.546	2.86329e-05	2.85701e-05	2.84005e-05	2.6858e-05	2.67721e-05	2.65873e-05	2.73209e-05	2.72324e-05	2.70977e-05
2119.99	8.546	1.20056e-05	1.19833e-05	1.19137e-05	1.06466e-05	1.0638e-05	1.05918e-05	1.10536e-05	1.10733e-05	1.10074e-05
2128.41	8.546	2.97584e-06	2.96311e-06	2.96701e-06	2.34308e-06	2.36438e-06	2.34669e-06	2.70087e-06	2.71827e-06	2.71802e-06
2136.83	8.546	2.12877e-06	2.11073e-06	2.10974e-06	1.84569e-06	1.87837e-06	1.85425e-06	1.93631e-06	1.93895e-06	1.95387e-06
2145.24	8.546	9.86926e-06	9.82025e-06	9.76619e-06	9.68182e-06	9.64326e-06	9.56924e-06	9.69581e-06	9.6471e-06	9.59561e-06
2153.66	8.546	1.34054e-05	1.3383e-05	1.3308e-05	1.39016e-05	1.38734e-05	1.37923e-05	1.36252e-05	1.35859e-05	1.35198e-05
2162.08	8.546	1.26832e-05	1.26507e-05	1.26226e-05	1.27094e-05	1.27181e-05	1.26888e-05	1.26515e-05	1.26162e-05	1.2606e-05
2170.49	8.546	6.73274e-06	6.75089e-06	6.77948e-06	6.50385e-06	6.50315e-06	6.52032e-06	6.59993e-06	6.59697e-06	6.60965e-06
2178.91	8.546	1.64176e-06	1.6646e-06	1.65436e-06	1.53202e-06	1.54069e-06	1.53951e-06	1.596e-06	1.59054e-06	1.62795e-06
2187.33	8.546	8.69689e-07	8.96985e-07	9.15976e-07	8.34137e-07	8.13472e-07	8.285e-07	8.52288e-07	8.31028e-07	8.76797e-07
2195.74	8.546	4.75049e-07	5.33051e-07	5.25552e-07	4.14301e-07	4.45195e-07	4.16514e-07	4.58318e-07	4.25765e-07	4.88721e-07
2204.16	8.546	1.25872e-07	1.25345e-07	1.50342e-07	1.16371e-07	8.75737e-08	1.27536e-07	1.11346e-07	1.28067e-07	1.41414e-07
2212.58	8.546	2.97833e-07	2.73586e-07	2.81633e-07	2.86744e-07	2.65178e-07	2.85088e-07	2.43507e-07	3.09092e-07	2.79257e-07
2220.99	8.546	2.06243e-07	2.23479e-07	1.59704e-07	1.95543e-07	1.928e-07	1.77434e-07	1.67946e-07	2.28874e-07	2.20501e-07
2229.41	8.546	1.25346e-07	1.81232e-07	1.31272e-07	1.08574e-07	1.26119e-07	1.23532e-07	1.43806e-07	1.29967e-07	9.34105e-08
2237.83	8.546	6.26393e-08	3.28912e-08	2.65355e-08	2.17201e-08	5.70221e-08	3.62612e-08	4.43261e-08	3.01839e-08	2.26384e-08
2246.24	8.546	9.54887e-08	6.94468e-08	8.73873e-08	8.00056e-08	9.80457e-08	8.01585e-08	7.12263e-08	8.73658e-08	6.15722e-08
2254.66	8.546	1.78009e-07	1.91459e-07	1.69922e-07	1.87615e-07	2.11786e-07	1.8817e-07	1.9501e-07	1.79441e-07	2.03174e-07
2263.08	8.546	5.56406e-08	1.11417e-07	7.38123e-08	8.81172e-08	6.4149e-08	1.08261e-07	8.26866e-08	5.86367e-08	9.07467e-08
2271.49	8.546	5.70263e-08	8.20706e-08	5.93165e-08	3.72149e-08	2.15303e-08	5.22569e-08	7.78711e-08	4.18434e-08	5.78942e-08
2279.91	8.546	3.79417e-08	8.90017e-08	6.12959e-08	6.30828e-08	2.46017e-08	3.90412e-08	4.07896e-08	8.00775e-08	8.52826e-08
2288.33	8.546	2.32912e-08	1.05619e-08	3.29054e-08	2.5564e-08	3.12805e-09	3.26262e-08	4.98401e-08	1.57143e-09	5.36277e-08
2296.74	8.546	1.70273e-08	6.11503e-10	2.41135e-08	1.22899e-08	7.71732e-09	6.46178e-09	1.66586e-08	0	1.95961e-08
2305.16	8.546	1.23915e-10	0	1.33981e-10	2.64166e-08	6.99649e-09	1.99661e-08	3.15663e-11	0	1.44439e-08
2313.58	8.546	0	0	0	1.24057e-09	2.11971e-08	8.7197e-10	0	0	3.10081e-08
2321.99	8.546	0	0	0	0	1.00328e-08	0	0	0	3.99831e-09
2330.41	8.546	0	0	0	0	4.22815e-11	0	0	0	1.89575e-12
2338.83	8.546	2.45318e-10	0	0	0	0	0	0	0	0
2347.24	8.546	1.00138e-08	0	0	0	0	0	6.52153e-11	0	0
2355.66	8.546	1.44182e-09	1.83893e-11	0	0	0	0	6.84215e-09	0	0
2364.08	8.546	9.04826e-13	8.28682e-09	0	0	0	0	3.77825e-09	0	0
2372.49	8.546	0	4.46535e-08	0	0	0	0	1.18341e-11	0	0
2380.91	8.546	0	3.89026e-09	1.81793e-13	0	0	0	0	0	0
2389.33	8.546	0	2.56166e-12	3.15951e-10	1.55445e-13	0	1.49324e-12	4.38818e-12	0	0
2397.74	8.546	0	0	2.3321e-09	4.14393e-10	0	1.96197e-09	2.97946e-09	0	0
2406.16	8.546	0	0	1.11046e-10	1.0799e-08	0	2.59308e-08	1.66047e-08	0	8.79021e-12
2414.58	8.546	0	1.75744e-26	1.64215e-09	1.63344e-08	0	1.8601e-09	4.86053e-10	0	4.02516e-10
2422.99	8.546	0	3.67667e-24	2.44878e-09	1.6782e-08	0	4.52353e-09	1.48895e-13	2.31988e-12	3.34519e-09
2431.41	8.546	4.20665e-10	3.48683e-24	1.84642e-11	2.87215e-10	0	1.31832e-08	6.49146e-10	5.49862e-10	4.08592e-08
2439.83	8.546	1.77339e-08	8.90278e-13	0	9.50593e-09	0	2.02916e-08	1.98242e-08	2.03622e-09	3.13006e-09
2448.24	8.546	4.62832e-09	3.41175e-09	7.91253e-13	2.40087e-08	1.84971e-12	3.77659e-08	2.79079e-08	4.94822e-08	1.84755e-12
2456.66	8.546	1.10373e-09	3.86854e-08	2.2465e-09	2.12287e-10	9.65029e-10	4.28358e-08	3.01779e-08	5.72614e-08	9.49807e-13
2465.08	8.546	5.24536e-08	8.73632e-08	6.06868e-08	1.08727e-08	1.92271e-08	5.27036e-08	3.04302e-08	2.32569e-08	1.12221e-09
2473.49	8.546	1.27259e-07	1.68305e-07	2.85374e-08	1.31928e-07	6.75816e-08	1.71864e-07	9.5496e-08	1.37758e-07	1.89098e-08
2481.91	8.546	2.72631e-06	2.30424e-06	1.61322e-06	2.03107e-06	1.65351e-06	1.20628e-06	2.22369e-06	1.95433e-06	1.3319e-06
2490.33	8.546	3.97519e-06	4.06318e-06	4.3514e-06	3.25235e-06	3.26472e-06	3.40628e-06	3.51533e-06	3.6082e-06	3.76275e-06
2498.74	8.546	1.94719e-06	1.90355e-06	2.05562e-06	1.79558e-06	1.84115e-06	1.87128e-06	1.74963e-06	1.78666e-06	1.83613e-06
2507.16	8.546	1.33115e-06	1.27643e-06	1.32177e-06	1.15423e-06	1.26215e-06	1.19827e-06	1.34057e-06	1.18379e-06	1.22136e-06
2515.58	8.546	1.60267e-06	1.70337e-06	1.56547e-06	1.36879e-06	1.34762e-06	1.36554e-06	1.51893e-06	1.59944e-06	1.44006e-06

## Sheet: k_GF5A
Wavelength	FWHM	k_Summer_L	k_Summer_M	k_Summer_H	k_Winter_L	k_Winter_M	k_Winter_H	k_1976_L	k_1976_M	k_1976_H
1014.15	8.25	0	0	0	0	0	0	0	0	0
1022.56	8.25	0	0	0	0	0	0	0	0	0
1030.98	8.25	0	0	0	0	0	0	0	0	0
1039.4	8.25	7.25854e-07	7.19061e-07	7.17799e-07	7.24425e-07	7.36375e-07	7.44634e-07	7.25359e-07	7.31199e-07	7.28621e-07
1047.81	8.25	9.73793e-07	9.75e-07	9.76055e-07	1.0055e-06	1.01049e-06	1.00271e-06	9.7186e-07	9.69713e-07	9.71719e-07
1056.23	8.25	4.51639e-07	4.56973e-07	4.4002e-07	4.27888e-07	4.17659e-07	4.18011e-07	4.3487e-07	4.33236e-07	4.30743e-07
1064.65	8.25	3.50126e-07	3.3362e-07	3.38858e-07	3.59254e-07	3.46345e-07	3.54756e-07	3.47467e-07	3.47841e-07	3.38303e-07
1073.06	8.25	4.75558e-08	5.58129e-08	5.94007e-08	2.90728e-08	3.29115e-08	4.73171e-08	4.86158e-08	3.3472e-08	3.91938e-08
1081.48	8.25	5.25132e-09	3.46579e-09	6.92996e-09	8.93102e-09	9.00802e-10	3.25413e-09	1.94703e-09	1.14358e-08	6.8077e-09
1089.9	8.25	1.7806e-09	0	2.2445e-09	0	0	-1.97843e-09	1.45893e-09	0	0
1098.31	8.25	0	2.87056e-09	0	0	2.47719e-09	0	0	0	0
1106.73	8.25	0	0	0	0	0	0	0	0	0
1115.15	8.25	1.85164e-09	0	5.69374e-09	2.96734e-09	0	-8.29787e-25	0	0	0
1123.56	8.25	0	0	0	0	0	0	0	0	0
1131.98	8.25	0	0	0	2.20361e-09	0	0	0	0	0
1140.4	8.25	0	0	0	0	0	0	0	0	0
1148.81	8.25	0	0	0	0	0	0	0	0	0
1157.23	8.25	0	0	0	0	0	0	0	0	0
1165.65	8.25	0	0	0	0	0	0	0	0	0
1174.06	8.25	0	0	0	0	0	0	0	3.83822e-09	0
1182.48	8.25	0	0	0	0	0	0	0	0	0
1190.9	8.25	0	0	0	0	0	0	1.57852e-09	0	0
1199.31	8.25	2.86941e-06	2.84485e-06	2.76838e-06	2.71572e-06	2.69692e-06	2.6252e-06	2.77266e-06	2.74679e-06	2.67962e-06
1207.73	8.25	3.83218e-05	3.76261e-05	3.6851e-05	3.88268e-05	3.81302e-05	3.73486e-05	3.84048e-05	3.77089e-05	3.69334e-05
1216.15	8.25	1.42986e-05	1.44373e-05	1.46636e-05	1.41956e-05	1.43354e-05	1.45892e-05	1.41839e-05	1.43279e-05	1.45702e-05
1224.56	8.25	1.57168e-05	1.58361e-05	1.60139e-05	1.58133e-05	1.59172e-05	1.60903e-05	1.56842e-05	1.57868e-05	1.59503e-05
1232.98	8.25	1.72806e-06	1.73037e-06	1.72554e-06	1.53373e-06	1.54428e-06	1.53932e-06	1.61553e-06	1.61602e-06	1.61149e-06
1241.4	8.25	4.01073e-07	3.89605e-07	3.96067e-07	3.75622e-07	3.70009e-07	3.72842e-07	3.75154e-07	3.81638e-07	3.76834e-07
1249.81	8.25	1.53007e-07	1.54328e-07	1.51404e-07	1.60919e-07	1.56794e-07	1.51494e-07	1.54274e-07	1.5265e-07	1.52272e-07
1258.23	8.25	2.09241e-07	1.92617e-07	2.08325e-07	1.87645e-07	1.97724e-07	2.12848e-07	2.07271e-07	1.99375e-07	1.85686e-07
1266.65	8.25	1.96726e-07	2.10394e-07	2.03327e-07	2.1576e-07	2.06217e-07	2.08472e-07	2.09845e-07	1.96038e-07	1.86523e-07
1275.06	8.25	2.25598e-09	0	0	1.76072e-09	1.87965e-09	3.33192e-09	0	0	0
1283.48	8.25	1.09722e-07	9.94568e-08	1.01114e-07	8.74888e-08	8.08936e-08	9.37385e-08	9.18365e-08	8.0624e-08	8.09889e-08
1291.9	8.25	2.23291e-06	2.23414e-06	2.24684e-06	2.25845e-06	2.26428e-06	2.26622e-06	2.23014e-06	2.23148e-06	2.24278e-06
1300.31	8.25	4.00453e-07	3.99601e-07	4.12571e-07	4.0045e-07	3.8515e-07	3.843e-07	4.02573e-07	3.88515e-07	4.06929e-07
1308.73	8.25	5.01662e-07	4.88361e-07	4.35351e-07	4.81946e-07	4.49156e-07	4.20338e-07	4.95201e-07	4.62144e-07	4.27114e-07
1317.15	8.25	7.91572e-06	7.90663e-06	7.88429e-06	8.07358e-06	8.09507e-06	8.07289e-06	7.95978e-06	7.98021e-06	7.94875e-06
1325.56	8.25	1.11477e-06	1.15245e-06	1.15583e-06	1.00411e-06	1.041e-06	1.072e-06	1.03122e-06	1.07555e-06	1.09327e-06
1333.98	8.25	1.3074e-06	1.28683e-06	1.24111e-06	1.28147e-06	1.25021e-06	1.211e-06	1.28516e-06	1.25872e-06	1.21568e-06
1342.4	8.25	3.11475e-06	3.23148e-06	3.32371e-06	3.17508e-06	3.34743e-06	3.43115e-06	3.13574e-06	3.26803e-06	3.35004e-06
1350.81	8.25	4.78953e-07	5.15167e-07	7.82429e-07	3.79712e-07	5.49783e-07	6.72782e-07	4.20773e-07	5.75814e-07	7.27821e-07
1359.23	8.25	6.76571e-09	4.12883e-08	2.07895e-09	6.38902e-08	1.00262e-08	5.41585e-09	2.90041e-08	5.04279e-08	4.66254e-09
1367.65	8.25	1.78816e-07	1.20116e-07	4.04676e-08	1.7204e-07	6.47189e-08	4.05954e-08	2.01493e-07	1.04461e-07	3.31797e-08
1376.06	8.25	2.52529e-07	2.14497e-07	1.05411e-07	2.43606e-07	2.25248e-07	6.93144e-08	2.47917e-07	2.11815e-07	7.54819e-08
1384.48	8.25	1.76166e-08	4.97942e-09	2.22545e-09	0	5.64194e-09	0	3.95979e-08	2.41144e-08	-6.8069e-09
1392.9	8.25	3.14079e-09	1.84438e-10	0	7.88755e-10	0	0	7.49175e-09	0	0
1401.31	8.25	0	0	0	2.37694e-08	0	0	0	0	6.72604e-09
1409.73	8.25	0	0	-4.38567e-09	0	0	0	0	0	0
1418.15	8.25	2.70711e-09	1.48927e-08	0	7.42606e-09	9.11858e-10	1.77518e-08	5.53058e-09	1.33425e-08	8.98811e-09
1426.56	8.25	3.511e-05	2.82778e-05	2.27373e-05	3.50173e-05	2.77761e-05	2.12227e-05	3.51095e-05	2.80827e-05	2.19525e-05
1434.98	8.25	0.000292974	0.000268441	0.000230175	0.000303209	0.000279164	0.000242483	0.000297301	0.000272948	0.000234713
1443.4	8.25	0.000142244	0.000137403	0.000126563	0.000132776	0.000128936	0.000120554	0.000136124	0.000131744	0.00012183
1451.81	8.25	1.6151e-05	1.52692e-05	1.41048e-05	1.27552e-05	1.20666e-05	1.1115e-05	1.40038e-05	1.32372e-05	1.21872e-05
1460.23	8.25	7.65829e-07	7.55577e-07	7.16833e-07	4.98826e-07	5.40604e-07	4.92264e-07	5.78682e-07	5.99962e-07	5.94768e-07
1468.65	8.25	4.83692e-06	4.42438e-06	3.60338e-06	4.8608e-06	4.53135e-06	3.73431e-06	4.8165e-06	4.44043e-06	3.6736e-06
1477.06	8.25	1.07711e-05	1.00585e-05	9.04072e-06	1.09874e-05	1.0281e-05	9.27511e-06	1.0844e-05	1.01606e-05	9.15729e-06
1485.48	8.25	2.47702e-06	2.37867e-06	2.25948e-06	2.25619e-06	2.17851e-06	2.04162e-06	2.35701e-06	2.24794e-06	2.13861e-06
1493.9	8.25	2.80315e-06	2.8822e-06	3.04753e-06	2.74953e-06	2.83313e-06	2.98213e-06	2.77008e-06	2.84061e-06	3.00685e-06
1502.31	8.25	1.15302e-06	1.14975e-06	1.16569e-06	1.11772e-06	1.12874e-06	1.14219e-06	1.11947e-06	1.12461e-06	1.15391e-06
1510.73	8.25	1.80222e-08	2.96132e-08	2.45222e-08	2.32581e-08	1.67203e-08	1.89776e-08	1.95855e-08	2.59927e-08	3.13027e-08
1519.15	8.25	4.16857e-07	4.25147e-07	4.21042e-07	3.26332e-07	3.14865e-07	3.33809e-07	3.35822e-07	3.53539e-07	3.57248e-07
1527.56	8.25	9.58649e-06	9.62873e-06	9.74959e-06	8.86645e-06	8.91554e-06	8.99427e-06	9.11354e-06	9.16435e-06	9.26433e-06
1535.98	8.25	3.58704e-05	3.59039e-05	3.59762e-05	3.65437e-05	3.65712e-05	3.66143e-05	3.60697e-05	3.60979e-05	3.61642e-05
1544.4	8.25	1.69209e-05	1.68915e-05	1.68851e-05	1.68787e-05	1.68856e-05	1.68731e-05	1.68174e-05	1.6801e-05	1.68031e-05
1552.81	8.25	5.41355e-07	5.29439e-07	5.37079e-07	4.70339e-07	4.73872e-07	4.65688e-07	4.87875e-07	4.88891e-07	4.94771e-07
1561.23	8.25	1.75916e-06	1.75958e-06	1.76556e-06	1.46032e-06	1.46664e-06	1.46916e-06	1.58664e-06	1.58665e-06	1.58539e-06
1569.65	8.25	0.000135804	0.000135869	0.000135975	0.00013398	0.000134023	0.000134151	0.000134126	0.000134185	0.000134295
1578.06	8.25	0.000165058	0.000165024	0.00016497	0.00016842	0.000168378	0.000168329	0.000166133	0.000166105	0.00016604
1586.48	8.25	3.27069e-05	3.26866e-05	3.26349e-05	3.07259e-05	3.07031e-05	3.06738e-05	3.14084e-05	3.14067e-05	3.13632e-05
1594.9	8.25	2.7963e-05	2.79784e-05	2.80434e-05	2.67485e-05	2.67665e-05	2.6815e-05	2.7135e-05	2.71606e-05	2.72168e-05
1603.31	8.25	0.000178911	0.00017893	0.000178988	0.000184389	0.000184429	0.000184492	0.00018117	0.000181191	0.000181261
1611.73	8.25	0.000127954	0.00012795	0.000127906	0.000127155	0.000127162	0.000127132	0.000126915	0.000126878	0.000126879
1620.15	8.25	2.02291e-05	2.02445e-05	2.02187e-05	1.71021e-05	1.71131e-05	1.71033e-05	1.83431e-05	1.83377e-05	1.83369e-05
1628.56	8.25	4.20506e-06	4.21756e-06	4.22622e-06	3.91406e-06	3.92557e-06	3.9144e-06	4.02162e-06	4.02541e-06	4.033e-06
1636.98	8.25	1.47454e-05	1.47495e-05	1.47261e-05	1.45038e-05	1.45125e-05	1.44759e-05	1.4538e-05	1.45434e-05	1.45351e-05
1645.4	8.25	3.14634e-05	3.14914e-05	3.15112e-05	3.25522e-05	3.25647e-05	3.25974e-05	3.19592e-05	3.19725e-05	3.19961e-05
1653.81	8.25	1.62005e-05	1.62061e-05	1.61809e-05	1.57578e-05	1.57518e-05	1.57423e-05	1.58817e-05	1.58926e-05	1.58719e-05
1662.23	8.25	3.21359e-06	3.21468e-06	3.20785e-06	2.72553e-06	2.7218e-06	2.73093e-06	2.87805e-06	2.88152e-06	2.88739e-06
1670.65	8.25	1.41735e-06	1.4123e-06	1.42622e-06	1.1365e-06	1.14836e-06	1.15106e-06	1.25785e-06	1.26175e-06	1.27691e-06
1679.06	8.25	3.48433e-07	3.23411e-07	3.34921e-07	2.93186e-07	2.98511e-07	2.91745e-07	3.07222e-07	3.08333e-07	3.08426e-07
1687.48	8.25	1.05491e-07	1.007e-07	1.11021e-07	1.11023e-07	9.10436e-08	1.04841e-07	1.15383e-07	9.12281e-08	9.57548e-08
1695.9	8.25	1.72827e-08	3.13674e-08	1.75757e-08	4.27063e-08	1.53884e-08	1.90392e-08	2.76943e-08	1.75019e-08	1.66691e-08
1704.31	8.25	2.04674e-08	1.16157e-08	2.41413e-08	1.41685e-08	1.17016e-08	1.054e-08	1.85885e-08	3.41638e-08	3.43943e-08
1712.73	8.25	3.79926e-08	1.70727e-08	2.20654e-08	1.66867e-08	9.83261e-09	1.60225e-08	1.976e-08	2.91986e-08	3.08709e-08
1721.15	8.25	2.23782e-08	1.05009e-08	3.05839e-08	2.56529e-08	2.22433e-24	1.61376e-08	5.68436e-09	1.86399e-10	1.82493e-08
1729.56	8.25	1.09843e-08	1.65522e-08	8.53512e-09	2.89366e-09	0	7.09054e-10	1.85453e-09	0	6.49571e-10
1737.98	8.25	0	8.07712e-09	8.99717e-09	0	0	0	2.13648e-26	0	0
1746.4	8.25	1.45338e-08	1.66174e-08	1.55159e-08	9.56957e-09	1.007e-08	1.02506e-08	1.1628e-08	1.21044e-08	1.26793e-08
1754.81	8.25	2.63552e-07	2.72651e-07	2.67455e-07	1.90275e-07	1.84516e-07	1.8143e-07	2.21034e-07	2.21383e-07	2.34077e-07
1763.23	8.25	2.26969e-07	2.34923e-07	2.58694e-07	1.46985e-07	1.59789e-07	1.42648e-07	1.67631e-07	1.7693e-07	1.66677e-07
1771.65	8.25	6.90307e-08	6.91218e-08	9.56849e-08	5.90766e-08	3.88635e-08	2.93715e-08	3.03819e-08	5.17032e-08	3.54466e-08
1780.06	8.25	3.70336e-08	3.81009e-08	3.75934e-08	2.63657e-08	3.01642e-08	1.60762e-08	2.5932e-08	2.14158e-08	5.77447e-08
1788.48	8.25	2.68565e-07	2.65442e-07	2.71444e-07	1.74374e-07	2.02421e-07	1.71136e-07	2.13039e-07	2.01034e-07	2.09742e-07
1796.9	8.25	1.45921e-07	1.2154e-07	1.95839e-07	9.98849e-08	5.89706e-08	9.51095e-08	1.29207e-07	9.80836e-08	8.58335e-08
1805.31	8.25	5.68369e-08	6.19034e-08	1.58337e-07	3.10308e-08	6.68259e-08	7.60953e-09	5.36084e-08	8.51079e-08	4.38488e-08
1813.73	8.25	5.43831e-08	4.41847e-09	1.71953e-08	1.80792e-08	1.30511e-08	1.24211e-10	3.72939e-08	8.00404e-08	2.12661e-09
1822.15	8.25	5.75041e-09	1.66797e-09	1.21738e-08	7.51676e-09	0	0	9.12802e-09	1.17135e-08	0
1830.56	8.25	1.23411e-12	6.15809e-10	8.26204e-09	0	0	0	0	0	0
1838.98	8.25	0	0	0	0	0	0	0	0	0
1847.4	8.25	0	0	0	0	0	0	0	0	0
1855.82	8.25	3.20722e-10	0	1.4779e-09	1.56606e-08	1.98303e-09	1.63337e-09	2.99278e-25	0	4.1175e-10
1864.23	8.25	2.67714e-08	1.09708e-08	7.86068e-08	1.84315e-07	1.28575e-08	8.28863e-08	1.59985e-08	8.85399e-09	3.14947e-08
1872.65	8.25	1.83399e-05	1.47967e-05	4.8982e-06	1.82198e-05	1.47789e-05	3.68216e-06	1.81871e-05	1.46783e-05	4.39351e-06
1881.07	8.25	5.59637e-05	5.23183e-05	2.77809e-05	5.69676e-05	5.30725e-05	2.35601e-05	5.62713e-05	5.23732e-05	2.58258e-05
1889.48	8.25	1.81508e-05	1.67431e-05	9.31729e-06	1.77633e-05	1.65654e-05	8.19242e-06	1.78387e-05	1.64649e-05	8.64063e-06
1897.9	8.25	3.71312e-06	3.62998e-06	1.53406e-06	3.29208e-06	3.17626e-06	1.1321e-06	3.36969e-06	3.30648e-06	1.30184e-06
1906.32	8.25	1.41489e-06	1.08702e-06	2.46245e-07	1.14505e-06	9.41199e-07	2.13483e-07	1.08926e-06	9.91327e-07	3.03461e-07
1914.73	8.25	8.41977e-07	6.35759e-07	2.76496e-07	6.84592e-07	4.49217e-07	1.68164e-07	6.94128e-07	5.69325e-07	2.29495e-07
1923.15	8.25	7.51734e-07	6.61652e-07	3.97907e-07	4.85929e-07	4.95417e-07	2.19244e-07	6.02955e-07	5.46035e-07	2.81782e-07
1931.57	8.25	4.82653e-06	6.2847e-06	8.33123e-06	3.39203e-06	4.54988e-06	6.7502e-06	3.86345e-06	5.09285e-06	7.13003e-06
1939.98	8.25	0.000139604	0.000176878	0.000220415	0.000112085	0.00014018	0.000178341	0.000123135	0.000154819	0.000194865
1948.4	8.25	0.000734575	0.000768638	0.00079745	0.000680685	0.000720846	0.000768727	0.000701975	0.000738715	0.000776174
1956.82	8.25	0.00136718	0.00131959	0.0012298	0.00137738	0.0013408	0.00127517	0.0013657	0.00132356	0.00124342
1965.23	8.25	0.00102303	0.00100581	0.000981804	0.00104605	0.00103073	0.00101031	0.00102996	0.00101369	0.000990629
1973.65	8.25	0.000398922	0.000398654	0.000396821	0.000388352	0.000388716	0.000388846	0.000391555	0.000391657	0.000390754
1982.07	8.25	8.7806e-05	8.66952e-05	8.38678e-05	7.83342e-05	7.75782e-05	7.54379e-05	8.20728e-05	8.11489e-05	7.86806e-05
1990.48	8.25	9.07329e-05	9.05709e-05	9.04003e-05	8.31952e-05	8.30596e-05	8.29622e-05	8.60412e-05	8.59103e-05	8.57265e-05
1998.9	8.25	0.000881904	0.000886794	0.000899094	0.000841258	0.000846964	0.000859471	0.000858291	0.000863686	0.000876183
2007.32	8.25	0.00287833	0.00284691	0.00279727	0.00290083	0.00287215	0.00282744	0.00288033	0.00285037	0.00280276
2015.73	8.25	0.00240341	0.0024048	0.00240369	0.00237686	0.00237758	0.00237701	0.00237847	0.00237945	0.00237847
2024.15	8.25	0.000861793	0.000862726	0.000862964	0.000778389	0.000778484	0.000777612	0.00081199	0.000812358	0.000812052
2032.57	8.25	0.000357662	0.000356645	0.000355143	0.000317328	0.000316745	0.000315753	0.0003331	0.000332331	0.000331107
2040.98	8.25	0.00031569	0.00031543	0.00031516	0.000310027	0.000309767	0.000309347	0.000310973	0.00031067	0.000310354
2049.4	8.25	0.000704542	0.000704541	0.000704292	0.000700181	0.000700082	0.000699827	0.000699422	0.000699402	0.000699156
2057.82	8.25	0.000865959	0.000866701	0.000867816	0.000904407	0.000905596	0.000907608	0.000882932	0.000883816	0.000885294
2066.23	8.25	0.000820519	0.000821496	0.000823286	0.000837053	0.000838097	0.000840001	0.000825497	0.000826523	0.000828368
2074.65	8.25	0.000583158	0.000582008	0.000579763	0.000547211	0.000546188	0.000544144	0.000561054	0.000559984	0.000557862
2083.07	8.25	0.000344209	0.000343572	0.000342494	0.000307884	0.000307326	0.000306375	0.000322274	0.000321663	0.000320678
2091.48	8.25	0.000205411	0.000205535	0.000205626	0.000176288	0.000176418	0.000176602	0.000187845	0.000187985	0.000188102
2099.9	8.25	7.41306e-05	7.40239e-05	7.38385e-05	6.44285e-05	6.42641e-05	6.40204e-05	6.80564e-05	6.79379e-05	6.76824e-05
2108.32	8.25	3.08356e-05	3.07355e-05	3.05508e-05	2.82648e-05	2.81439e-05	2.79355e-05	2.90418e-05	2.89295e-05	2.87543e-05
2116.73	8.25	1.94791e-05	1.94743e-05	1.94046e-05	1.79657e-05	1.79615e-05	1.7912e-05	1.83614e-05	1.83683e-05	1.83254e-05
2125.15	8.25	4.60391e-06	4.59404e-06	4.57531e-06	3.66039e-06	3.68492e-06	3.65617e-06	4.10169e-06	4.13188e-06	4.10747e-06
2133.57	8.25	2.12427e-06	2.10402e-06	2.10732e-06	1.81305e-06	1.8288e-06	1.81522e-06	1.9587e-06	1.97281e-06	1.98333e-06
2141.98	8.25	4.21833e-06	4.19848e-06	4.19609e-06	3.96224e-06	3.97733e-06	3.93803e-06	4.01284e-06	3.99329e-06	3.99903e-06
2150.4	8.25	1.60926e-05	1.6075e-05	1.60415e-05	1.64178e-05	1.63936e-05	1.63505e-05	1.61995e-05	1.61816e-05	1.6144e-05
2158.82	8.25	1.18619e-05	1.18248e-05	1.17564e-05	1.21221e-05	1.211e-05	1.20451e-05	1.19609e-05	1.18993e-05	1.18663e-05
2167.23	8.25	9.63452e-06	9.6288e-06	9.62788e-06	9.41249e-06	9.40703e-06	9.40677e-06	9.48603e-06	9.47352e-06	9.46583e-06
2175.65	8.25	3.02014e-06	3.05216e-06	3.06307e-06	2.87622e-06	2.88856e-06	2.89964e-06	2.9673e-06	2.95746e-06	2.98489e-06
2184.07	8.25	8.60331e-07	8.70634e-07	8.72248e-07	7.94041e-07	7.8017e-07	7.87942e-07	8.17098e-07	8.09618e-07	8.53974e-07
2192.48	8.25	7.27012e-07	7.77825e-07	7.95072e-07	6.82487e-07	6.86396e-07	6.74435e-07	7.16816e-07	6.7451e-07	7.35159e-07
2200.9	8.25	1.78579e-07	2.17772e-07	2.13259e-07	1.41722e-07	1.63084e-07	1.6044e-07	1.72078e-07	1.6554e-07	2.06181e-07
2209.32	8.25	2.55593e-07	2.31245e-07	2.48122e-07	2.48695e-07	2.07278e-07	2.44885e-07	2.09466e-07	2.6162e-07	2.46827e-07
2217.73	8.25	2.23798e-07	2.0687e-07	1.83634e-07	2.08287e-07	2.06211e-07	2.11704e-07	1.71604e-07	2.50367e-07	2.25782e-07
2226.15	8.25	1.70862e-07	2.42071e-07	1.58692e-07	1.66839e-07	1.70168e-07	1.6321e-07	1.81749e-07	1.88014e-07	1.67052e-07
2234.57	8.25	8.62503e-08	7.18465e-08	6.12083e-08	4.47979e-08	7.68743e-08	5.51236e-08	7.27189e-08	5.79856e-08	3.83102e-08
2242.98	8.25	4.60521e-08	3.3881e-08	3.79091e-08	3.94577e-08	6.27955e-08	4.68008e-08	3.42462e-08	4.07845e-08	1.80662e-08
2251.4	8.25	1.87265e-07	1.58161e-07	1.63971e-07	1.63937e-07	1.9012e-07	1.63544e-07	1.69471e-07	1.78005e-07	1.80378e-07
2259.82	8.25	9.49446e-08	1.57934e-07	1.09454e-07	1.35371e-07	1.22214e-07	1.46787e-07	1.38303e-07	1.01579e-07	1.28922e-07
2268.23	8.25	3.928e-08	6.04097e-08	4.09932e-08	3.38735e-08	2.4514e-08	4.82752e-08	4.7019e-08	1.86446e-08	6.10404e-08
2276.65	8.25	5.70357e-08	1.2071e-07	8.57921e-08	5.86604e-08	3.36308e-08	5.94559e-08	7.33728e-08	1.0614e-07	7.14568e-08
2285.07	8.25	2.17074e-08	1.9143e-08	2.24032e-08	4.16058e-08	5.65802e-09	2.47713e-08	3.44317e-08	1.09958e-08	7.95688e-08
2293.48	8.25	2.88173e-08	3.01935e-09	4.47439e-08	9.21728e-09	8.8642e-09	1.65522e-08	4.35857e-08	4.99242e-12	3.17001e-08
2301.9	8.25	1.27351e-09	4.12518e-12	1.48291e-09	2.88776e-08	2.1401e-09	1.61816e-08	4.83303e-10	0	6.2855e-09
2310.32	8.25	0	0	1.00846e-27	6.36475e-09	2.12403e-08	4.8866e-09	0	0	3.05798e-08
2318.73	8.25	0	0	0	1.45542e-11	1.95013e-08	8.34264e-12	0	0	1.5695e-08
2327.15	8.25	0	0	0	0	5.17819e-10	0	0	0	4.36827e-11
2335.57	8.25	8.94874e-12	0	0	0	0	0	0	0	0
2343.98	8.25	4.81337e-09	0	0	0	0	0	1.35402e-12	0	0
2352.4	8.25	6.01645e-09	0	0	0	0	0	1.842e-09	0	0
2360.82	8.25	2.20543e-11	1.03823e-09	0	0	0	0	9.00924e-09	0	0
2369.23	8.25	0	3.97902e-08	0	0	0	0	1.87983e-10	0	0
2377.65	8.25	0	1.6177e-08	0	0	0	0	0	0	0
2386.07	8.25	0	6.74265e-11	2.38671e-11	0	0	0	0	0	0
2394.48	8.25	0	0	2.00077e-09	2.93888e-11	0	1.90657e-10	3.96937e-10	0	0
2402.9	8.25	0	0	6.60304e-10	5.50018e-09	0	1.76121e-08	1.66776e-08	0	2.46114e-13
2411.32	8.25	0	2.11723e-27	2.84599e-10	1.09166e-08	0	7.75338e-09	2.7283e-09	0	1.69381e-10
2419.73	8.25	0	2.6755e-25	4.91463e-09	2.62202e-08	0	5.86282e-10	1.70869e-12	2.68192e-14	4.86932e-10
2428.15	8.25	2.02551e-11	1.46661e-23	1.44391e-10	1.75041e-09	0	1.49663e-08	3.71147e-11	1.12719e-10	2.6914e-08
2436.57	8.25	8.80352e-09	1.32703e-26	2.65917e-14	1.86405e-09	0	7.50764e-09	1.09121e-08	1.58912e-09	1.59441e-08
2444.98	8.25	1.33041e-08	2.17429e-10	0	3.16097e-08	1.9546e-14	4.99894e-08	2.41712e-08	2.15221e-08	2.72594e-11
2453.4	8.25	1.35679e-10	3.24558e-08	1.89204e-10	1.85898e-09	1.65058e-10	2.67522e-08	2.56358e-08	5.25126e-08	1.26033e-14
2461.82	8.25	1.97279e-08	3.958e-08	3.12379e-08	1.35165e-09	6.68236e-09	4.42124e-08	2.07092e-08	3.5842e-08	1.20508e-10
2470.23	8.25	1.04852e-07	1.77041e-07	4.07645e-08	7.49155e-08	5.6674e-08	1.0883e-07	7.73156e-08	8.61461e-08	8.57643e-09
2478.65	8.25	9.35205e-07	7.04891e-07	3.69988e-07	7.02604e-07	4.72531e-07	3.60717e-07	7.14545e-07	6.08281e-07	2.99934e-07
2487.07	8.25	5.09094e-06	5.06491e-06	5.04782e-06	4.00786e-06	3.89836e-06	3.8349e-06	4.37892e-06	4.40055e-06	4.31712e-06
2495.48	8.25	2.05113e-06	2.04613e-06	2.20893e-06	1.8515e-06	1.9069e-06	1.99083e-06	1.83271e-06	1.88179e-06	1.93583e-06
2503.9	8.25	1.58649e-06	1.56017e-06	1.70869e-06	1.4503e-06	1.56531e-06	1.57646e-06	1.54836e-06	1.5017e-06	1.59177e-06
2512.32	8.25	1.54333e-06	1.46656e-06	1.29339e-06	1.26725e-06	1.2428e-06	1.11654e-06	1.45832e-06	1.35466e-06	1.17042e-06
2520.73	8.25	1.15722e-06	1.36111e-06	1.13464e-06	1.04467e-06	1.09552e-06	1.06379e-06	1.1908e-06	1.28718e-06	1.06722e-06

## Sheet: k_GF5
Wavelength	FWHM	k_Summer_L	k_Summer_M	k_Summer_H	k_Winter_L	k_Winter_M	k_Winter_H	k_1976_L	k_1976_M	k_1976_H
1004.77	7.67828	0	0	0	0	0	0	0	0	0
1013.2	7.68189	0	0	0	0	0	0	0	0	0
1021.62	7.68551	0	0	0	0	0	0	0	0	0
1030.05	7.68912	0	0	0	0	0	0	0	0	0
1038.48	7.69273	7.37454e-07	7.29927e-07	7.29665e-07	7.37874e-07	7.48034e-07	7.57335e-07	7.3751e-07	7.40333e-07	7.36296e-07
1046.91	7.69634	7.48776e-07	7.43825e-07	7.42919e-07	7.50209e-07	7.54367e-07	7.53024e-07	7.40281e-07	7.31197e-07	7.35125e-07
1055.33	7.69995	6.9646e-07	7.09531e-07	6.92322e-07	6.84245e-07	6.78988e-07	6.74375e-07	6.89663e-07	6.91653e-07	6.82421e-07
1063.76	7.70356	3.1729e-07	3.02551e-07	3.11043e-07	3.25236e-07	3.14735e-07	3.1925e-07	3.09473e-07	3.22417e-07	3.03536e-07
1072.19	7.70718	5.30996e-08	6.06387e-08	6.07455e-08	3.46725e-08	3.68186e-08	5.6103e-08	5.65065e-08	4.22883e-08	4.48287e-08
1080.62	7.71079	8.96081e-09	7.71111e-09	7.41231e-09	1.31359e-08	1.08404e-09	6.14214e-09	2.26618e-09	1.24357e-08	1.56703e-08
1089.04	7.7144	0	0	1.80495e-09	0	0	-1.62995e-09	1.34603e-09	0	0
1097.47	7.71801	0	3.40468e-09	0	0	2.95311e-09	0	0	2.52293e-09	0
1105.9	7.72162	0	0	0	0	0	0	0	0	0
1114.32	7.72523	1.91896e-09	0	4.31596e-09	0	0	3.40316e-26	0	0	0
1122.75	7.72885	0	0	0	0	0	0	0	0	0
1131.18	7.73246	0	0	0	2.27228e-09	0	0	0	0	0
1139.61	7.73607	0	0	0	0	0	0	0	0	0
1148.03	7.73968	0	0	0	0	0	0	0	0	0
1156.46	7.74329	0	0	0	0	0	0	0	0	0
1164.89	7.7469	0	0	0	0	0	0	0	0	0
1173.32	7.75052	0	0	0	0	0	0	0	3.86766e-09	0
1181.74	7.75413	0	0	0	0	0	0	0	0	0
1190.17	7.75774	0	0	0	0	0	0	1.51187e-09	0	0
1198.6	7.76135	8.39555e-09	5.34789e-09	5.69987e-09	2.55024e-09	2.72263e-09	5.3799e-09	7.04782e-09	1.86819e-09	7.09134e-09
1206.8	7.3271	4.06785e-05	3.98699e-05	3.89784e-05	4.13808e-05	4.05577e-05	3.96497e-05	4.08693e-05	4.00485e-05	3.91574e-05
1215.2	7.76857	1.11683e-05	1.12866e-05	1.14703e-05	1.08822e-05	1.10005e-05	1.12083e-05	1.09608e-05	1.10813e-05	1.12812e-05
1223.6	8.1949	2.0311e-05	2.04545e-05	2.06637e-05	2.07535e-05	2.0886e-05	2.10976e-05	2.04597e-05	2.05919e-05	2.07953e-05
1232.34	8.48475	1.98964e-06	1.99363e-06	1.9903e-06	1.74672e-06	1.76075e-06	1.75577e-06	1.84842e-06	1.85228e-06	1.8436e-06
1240.76	8.26	4.67949e-07	4.56366e-07	4.61853e-07	4.36428e-07	4.32437e-07	4.37067e-07	4.39602e-07	4.4365e-07	4.41403e-07
1249.21	7.78302	1.28538e-07	1.33365e-07	1.30171e-07	1.39378e-07	1.33673e-07	1.30715e-07	1.3134e-07	1.32093e-07	1.32517e-07
1257.66	7.78663	2.0362e-07	1.85707e-07	2.03301e-07	1.83862e-07	1.96379e-07	2.06526e-07	2.03032e-07	1.93991e-07	1.8117e-07
1266.1	7.79024	2.16486e-07	2.29204e-07	2.22614e-07	2.36368e-07	2.27913e-07	2.28975e-07	2.29086e-07	2.1567e-07	2.04672e-07
1274.55	7.79386	2.56226e-09	0	1.4512e-25	2.00437e-09	0	3.73753e-09	0	0	1.32822e-09
1283	7.79747	7.48476e-08	6.5664e-08	6.80055e-08	5.84758e-08	5.18025e-08	6.37332e-08	6.00063e-08	5.07322e-08	5.13451e-08
1291.45	7.80108	2.21651e-06	2.21776e-06	2.22967e-06	2.23958e-06	2.24346e-06	2.24575e-06	2.21084e-06	2.21291e-06	2.22361e-06
1299.9	7.80469	5.2287e-07	5.21767e-07	5.38819e-07	5.2309e-07	5.10597e-07	5.12468e-07	5.25691e-07	5.1325e-07	5.32978e-07
1308.34	7.8083	2.99552e-07	3.07379e-07	2.7214e-07	2.88655e-07	2.74547e-07	2.6469e-07	2.99034e-07	2.86564e-07	2.68307e-07
1316.79	7.81191	7.95858e-06	7.93815e-06	7.89236e-06	8.12532e-06	8.13454e-06	8.08937e-06	8.00814e-06	8.01648e-06	7.96228e-06
1325.24	7.81553	1.30338e-06	1.33905e-06	1.33885e-06	1.18853e-06	1.22537e-06	1.25296e-06	1.21625e-06	1.25996e-06	1.27511e-06
1333.69	7.81914	1.09268e-06	1.08185e-06	1.05288e-06	1.05977e-06	1.03723e-06	1.01649e-06	1.06704e-06	1.05106e-06	1.02597e-06
1342.14	7.82275	3.1674e-06	3.26829e-06	3.34047e-06	3.2387e-06	3.39112e-06	3.45486e-06	3.1949e-06	3.30845e-06	3.37218e-06
1350.58	7.82636	4.77917e-07	5.06646e-07	7.46523e-07	3.78589e-07	5.39155e-07	6.44022e-07	4.20332e-07	5.65497e-07	6.98399e-07
1359.03	7.82997	6.60958e-09	3.77723e-08	2.06307e-09	5.84171e-08	9.35119e-09	5.35423e-09	2.8407e-08	5.00925e-08	4.16165e-09
1367.48	7.83358	1.61324e-07	1.16772e-07	3.8551e-08	1.70459e-07	6.26081e-08	3.95634e-08	1.97933e-07	1.00995e-07	3.26538e-08
1375.93	7.8372	2.58663e-07	2.18292e-07	1.07778e-07	2.48196e-07	2.29189e-07	7.11177e-08	2.52333e-07	2.15115e-07	7.69782e-08
1384.37	7.84081	1.78549e-08	5.49571e-09	2.34196e-09	0	6.39518e-09	0	4.02635e-08	2.64571e-08	-7.28514e-09
1392.82	7.84442	3.14093e-09	1.84913e-10	0	7.49237e-10	0	0	7.47498e-09	0	0
1401.27	7.84803	0	0	0	2.44774e-08	0	0	0	0	6.80953e-09
1409.72	7.85164	0	0	-4.49225e-09	0	0	0	0	0	0
1418.17	7.85525	2.59883e-09	1.44314e-08	0	7.42285e-09	8.19522e-10	1.74413e-08	5.41565e-09	1.25456e-08	8.45337e-09
1426.61	7.85887	3.28379e-05	2.66461e-05	2.16196e-05	3.27243e-05	2.61534e-05	2.01615e-05	3.28199e-05	2.64471e-05	2.08593e-05
1435.06	7.86248	0.000296455	0.000273476	0.000236346	0.000306927	0.000284225	0.000248866	0.000300801	0.000277872	0.000240892
1443.51	7.86609	0.000142361	0.000137912	0.000127675	0.000132812	0.000129332	0.000121531	0.000136198	0.000132193	0.00012287
1451.96	7.8697	1.49086e-05	1.4129e-05	1.30197e-05	1.17275e-05	1.11224e-05	1.02217e-05	1.2887e-05	1.22124e-05	1.12183e-05
1460.4	7.87331	7.00122e-07	6.89227e-07	6.50847e-07	4.52875e-07	4.94683e-07	4.43709e-07	5.26045e-07	5.4582e-07	5.42968e-07
1468.85	7.87692	5.09025e-06	4.68371e-06	3.85332e-06	5.11677e-06	4.7945e-06	3.99373e-06	5.07042e-06	4.70285e-06	3.93016e-06
1477.3	7.88054	1.05548e-05	9.87222e-06	8.92435e-06	1.07637e-05	1.00865e-05	9.15107e-06	1.06242e-05	9.96838e-06	9.03626e-06
1485.75	7.88415	2.32451e-06	2.23313e-06	2.12497e-06	2.1066e-06	2.03763e-06	1.91114e-06	2.20742e-06	2.10666e-06	2.00641e-06
1494.2	7.88776	2.88661e-06	2.96493e-06	3.12743e-06	2.83791e-06	2.91956e-06	3.06703e-06	2.85627e-06	2.92512e-06	3.08848e-06
1502.64	7.89137	1.02936e-06	1.02564e-06	1.04002e-06	9.93547e-07	1.0041e-06	1.01705e-06	9.96371e-07	1.00029e-06	1.03002e-06
1511.09	7.89498	1.65618e-08	2.88409e-08	2.33104e-08	2.18164e-08	1.52196e-08	1.67666e-08	1.71831e-08	2.49356e-08	2.98117e-08
1519.54	7.89859	5.31209e-07	5.3895e-07	5.36799e-07	4.21821e-07	4.11363e-07	4.3153e-07	4.38351e-07	4.57712e-07	4.61237e-07
1527.99	7.90221	9.92253e-06	9.96673e-06	1.00933e-05	9.18912e-06	9.24027e-06	9.32276e-06	9.43984e-06	9.49239e-06	9.59629e-06
1536.43	7.90582	3.62731e-05	3.62924e-05	3.63372e-05	3.70722e-05	3.70885e-05	3.71079e-05	3.65408e-05	3.65554e-05	3.65966e-05
1544.88	7.90943	1.51907e-05	1.51597e-05	1.51527e-05	1.50643e-05	1.50701e-05	1.50563e-05	1.50453e-05	1.50281e-05	1.5029e-05
1553.33	6.6598	3.72468e-07	3.62325e-07	3.70604e-07	3.28337e-07	3.32607e-07	3.24616e-07	3.36706e-07	3.37629e-07	3.45642e-07
1560.93	8.4042	1.43827e-06	1.43821e-06	1.44373e-06	1.19415e-06	1.19937e-06	1.20106e-06	1.29796e-06	1.29798e-06	1.29645e-06
1569.23	7.8809	0.000124649	0.000124713	0.000124817	0.000122229	0.000122271	0.000122396	0.000122691	0.000122749	0.000122857
1577.61	7.45885	0.000171515	0.000171487	0.000171445	0.000175496	0.000175458	0.000175418	0.000172904	0.000172882	0.000172826
1586.31	7.4983	3.3637e-05	3.36136e-05	3.35549e-05	3.15197e-05	3.14942e-05	3.14596e-05	3.22568e-05	3.22524e-05	3.22024e-05
1594.96	7.7622	2.56986e-05	2.5712e-05	2.5774e-05	2.44782e-05	2.44942e-05	2.45391e-05	2.48753e-05	2.48993e-05	2.4952e-05
1603.38	7.93471	0.000180559	0.000180577	0.000180634	0.000186213	0.000186252	0.000186314	0.000182909	0.00018293	0.000182998
1611.79	7.93832	0.000124915	0.000124911	0.000124869	0.000123735	0.000123743	0.000123715	0.000123676	0.000123639	0.000123643
1620.21	7.94194	1.98985e-05	1.99143e-05	1.98876e-05	1.6766e-05	1.67769e-05	1.67671e-05	1.80105e-05	1.80051e-05	1.80036e-05
1628.63	7.94555	4.20576e-06	4.21826e-06	4.22735e-06	3.92272e-06	3.93439e-06	3.9232e-06	4.02629e-06	4.02971e-06	4.03757e-06
1637.05	7.94916	1.45459e-05	1.45492e-05	1.45257e-05	1.42829e-05	1.42917e-05	1.4254e-05	1.43269e-05	1.4332e-05	1.43236e-05
1645.47	7.95277	3.12451e-05	3.1273e-05	3.12953e-05	3.23714e-05	3.23845e-05	3.24185e-05	3.17644e-05	3.17778e-05	3.18028e-05
1653.89	7.95638	1.5368e-05	1.53726e-05	1.5344e-05	1.48627e-05	1.48553e-05	1.48442e-05	1.50166e-05	1.50269e-05	1.50047e-05
1662.31	7.95999	3.18747e-06	3.18849e-06	3.18185e-06	2.70614e-06	2.70225e-06	2.7113e-06	2.85457e-06	2.85759e-06	2.86353e-06
1670.73	7.96361	1.3401e-06	1.33523e-06	1.3493e-06	1.07544e-06	1.08818e-06	1.09015e-06	1.18874e-06	1.19255e-06	1.2085e-06
1679.15	7.96722	3.31633e-07	3.05665e-07	3.17529e-07	2.78625e-07	2.83236e-07	2.76384e-07	2.91796e-07	2.91661e-07	2.91289e-07
1687.57	7.97083	1.04939e-07	1.00395e-07	1.10991e-07	1.11092e-07	9.0918e-08	1.0485e-07	1.15274e-07	9.09675e-08	9.56374e-08
1695.99	7.97444	1.61621e-08	3.01784e-08	1.63169e-08	4.19094e-08	1.50947e-08	1.73801e-08	2.58363e-08	1.66488e-08	1.60673e-08
1704.41	7.97805	2.03117e-08	1.15399e-08	2.422e-08	1.3861e-08	1.15842e-08	1.06214e-08	1.84685e-08	3.41329e-08	3.43406e-08
1712.83	7.98166	3.79761e-08	1.70926e-08	2.12138e-08	1.61995e-08	9.04965e-09	1.59027e-08	1.9385e-08	2.72076e-08	2.9361e-08
1721.25	7.98528	2.22245e-08	1.0475e-08	3.10174e-08	2.62685e-08	1.36666e-24	1.64519e-08	5.65828e-09	1.59049e-10	1.87584e-08
1729.67	7.98889	9.7285e-09	1.64854e-08	7.74029e-09	2.25091e-09	0	5.25545e-10	1.50579e-09	0	2.29154e-10
1738.08	7.9925	0	8.31873e-09	9.31264e-09	0	0	0	0	0	0
1746.5	7.99611	1.2773e-08	1.46943e-08	1.36746e-08	8.40005e-09	8.8555e-09	9.03233e-09	1.02034e-08	1.06559e-08	1.11766e-08
1754.92	7.99972	2.73747e-07	2.83428e-07	2.78392e-07	1.98108e-07	1.9189e-07	1.88472e-07	2.29789e-07	2.30318e-07	2.43657e-07
1763.34	8.00333	2.28044e-07	2.36128e-07	2.59842e-07	1.47093e-07	1.60978e-07	1.43212e-07	1.68367e-07	1.77409e-07	1.66903e-07
1771.76	8.00695	6.80117e-08	6.82661e-08	9.43424e-08	5.89336e-08	3.82193e-08	2.86698e-08	2.95638e-08	5.14432e-08	3.44225e-08
1780.18	8.01056	3.85699e-08	4.01115e-08	3.73316e-08	2.76295e-08	3.13921e-08	1.78154e-08	2.83302e-08	2.33491e-08	6.02008e-08
1788.6	8.01417	2.72352e-07	2.69529e-07	2.74953e-07	1.7686e-07	2.05823e-07	1.7365e-07	2.15964e-07	2.04439e-07	2.12782e-07
1797.02	8.01778	1.45431e-07	1.20967e-07	1.94113e-07	9.98279e-08	5.76265e-08	9.51021e-08	1.29167e-07	9.76965e-08	8.48006e-08
1805.44	8.02139	5.63615e-08	6.16549e-08	1.60053e-07	3.05975e-08	6.80081e-08	6.72675e-09	5.3443e-08	8.56843e-08	4.31772e-08
1813.86	8.025	5.54416e-08	3.8877e-09	1.53609e-08	1.82238e-08	1.18773e-08	1.1193e-10	3.77653e-08	8.16027e-08	1.86668e-09
1822.28	8.02862	5.12338e-09	1.7106e-09	1.22997e-08	7.11615e-09	0	0	8.53467e-09	1.03856e-08	0
1830.7	8.03223	0	4.99583e-10	6.91184e-09	0	0	0	0	0	0
1839.12	8.03584	0	0	0	0	0	0	0	0	0
1847.54	8.03945	0	0	0	0	0	0	0	0	0
1855.96	8.04306	2.74764e-10	0	1.24427e-09	1.4069e-08	1.87078e-09	1.43262e-09	-5.72446e-26	0	3.59469e-10
1864.38	8.04667	2.52114e-08	9.85409e-09	7.71433e-08	1.84875e-07	1.21717e-08	8.17378e-08	1.46388e-08	7.9253e-09	2.94926e-08
1872.79	8.05029	1.78527e-05	1.40846e-05	4.7064e-06	1.77265e-05	1.40604e-05	3.53166e-06	1.76962e-05	1.39678e-05	4.22076e-06
1881.21	8.0539	5.6539e-05	5.29247e-05	2.81296e-05	5.75709e-05	5.37205e-05	2.38706e-05	5.68594e-05	5.29956e-05	2.61569e-05
1889.63	8.05751	1.79226e-05	1.6563e-05	9.2199e-06	1.75313e-05	1.6393e-05	8.12055e-06	1.76104e-05	1.62876e-05	8.55296e-06
1898.05	8.06112	3.66166e-06	3.58077e-06	1.512e-06	3.24271e-06	3.12229e-06	1.1107e-06	3.31919e-06	3.25543e-06	1.28049e-06
1906.47	8.06473	1.40462e-06	1.05769e-06	2.39788e-07	1.13352e-06	9.18639e-07	2.05192e-07	1.07585e-06	9.65295e-07	3.05035e-07
1914.89	8.06834	8.12303e-07	6.22569e-07	2.82633e-07	6.56639e-07	4.37345e-07	1.70255e-07	6.70261e-07	5.57684e-07	2.25996e-07
1923.31	8.07196	7.4409e-07	6.59073e-07	3.96436e-07	4.82473e-07	4.95755e-07	2.19403e-07	5.98198e-07	5.42448e-07	2.80498e-07
1931.73	8.07557	4.57158e-06	5.91002e-06	7.64165e-06	3.20717e-06	4.27084e-06	6.20201e-06	3.65072e-06	4.77704e-06	6.53415e-06
1940.15	8.07918	0.00015375	0.00019175	0.000233287	0.00012395	0.000152752	0.000189814	0.000135936	0.000168336	0.000206886
1948.57	8.08279	0.000734879	0.000767888	0.000795879	0.000680746	0.000719764	0.000766462	0.000702149	0.000737808	0.000774286
1956.99	8.0864	0.00137577	0.00132733	0.00123578	0.00138664	0.00134923	0.00128207	0.0013746	0.00133162	0.00124981
1965.41	8.09001	0.00102789	0.00101106	0.000987455	0.00105151	0.00103657	0.00101653	0.0010351	0.00101921	0.000996535
1973.83	8.09363	0.000374125	0.000373746	0.000371586	0.000363056	0.000363308	0.000363112	0.000366593	0.000366585	0.000365368
1982.25	8.09724	8.7017e-05	8.59128e-05	8.31094e-05	7.75116e-05	7.67563e-05	7.46311e-05	8.12657e-05	8.03449e-05	7.78967e-05
1990.67	8.10085	9.8908e-05	9.87006e-05	9.84917e-05	9.08382e-05	9.06723e-05	9.05557e-05	9.38964e-05	9.37297e-05	9.35218e-05
1999.09	8.10446	0.000980563	0.00098634	0.00100004	0.000936119	0.000942725	0.000956627	0.000954752	0.000961033	0.000974923
2007.5	8.10807	0.00286858	0.00283779	0.00278955	0.00289466	0.00286647	0.00282285	0.00287243	0.00284304	0.00279668
2015.92	8.11168	0.00241868	0.0024204	0.00241978	0.00239363	0.00239468	0.00239461	0.0023944	0.00239571	0.00239522
2024.34	8.1153	0.000862844	0.000863932	0.000864367	0.000779059	0.00077929	0.000778604	0.000812815	0.000813328	0.000813214
2032.76	8.11891	0.000346429	0.000345321	0.000343711	0.000308548	0.000307893	0.000306814	0.000323263	0.000322412	0.000321088
2041.18	8.12252	0.000320645	0.000320539	0.000320529	0.000315459	0.000315318	0.000315108	0.000316194	0.00031603	0.000315952
2049.6	8.12613	0.00070603	0.000705985	0.000705656	0.000701535	0.000701403	0.000701088	0.00070083	0.000700773	0.000700455
2058.02	8.12974	0.000844546	0.000845345	0.00084654	0.000882822	0.000884098	0.000886247	0.000861503	0.00086246	0.000864039
2066.44	8.13335	0.000823359	0.000824224	0.000825833	0.00083664	0.000837531	0.000839175	0.000826551	0.000827448	0.000829082
2074.86	8.13697	0.000583924	0.000582778	0.000580544	0.000547846	0.000546826	0.00054479	0.000561749	0.000560684	0.000558571
2083.28	8.14058	0.000340388	0.000339842	0.000338919	0.000303888	0.000303419	0.000302624	0.000318348	0.000317828	0.000316998
2091.7	8.14419	0.000205393	0.000205514	0.000205598	0.00017622	0.000176347	0.000176525	0.000187797	0.000187935	0.000188045
2100.12	8.1478	7.39759e-05	7.38683e-05	7.36818e-05	6.43093e-05	6.41436e-05	6.38981e-05	6.79219e-05	6.78023e-05	6.75451e-05
2108.54	8.4804	3.10475e-05	3.09438e-05	3.07532e-05	2.84509e-05	2.83269e-05	2.81132e-05	2.92385e-05	2.91231e-05	2.8942e-05
2116.97	8.023	1.95037e-05	1.95e-05	1.94321e-05	1.79849e-05	1.79819e-05	1.79345e-05	1.83814e-05	1.83894e-05	1.83484e-05
2125.41	8.476	4.35017e-06	4.34046e-06	4.32528e-06	3.44409e-06	3.46915e-06	3.44167e-06	3.88092e-06	3.90917e-06	3.88867e-06
2134.3	8.38695	2.06978e-06	2.0498e-06	2.05119e-06	1.77253e-06	1.79311e-06	1.77691e-06	1.89807e-06	1.90975e-06	1.92192e-06
2142.31	8.12115	4.63203e-06	4.61038e-06	4.60586e-06	4.37738e-06	4.38696e-06	4.34595e-06	4.42671e-06	4.40467e-06	4.40728e-06
2150.88	8.16947	1.60172e-05	1.60037e-05	1.59721e-05	1.63944e-05	1.63736e-05	1.63327e-05	1.61546e-05	1.61396e-05	1.61043e-05
2159.31	8.17308	1.20688e-05	1.20311e-05	1.19686e-05	1.22954e-05	1.22869e-05	1.22277e-05	1.21484e-05	1.2089e-05	1.20614e-05
2167.73	8.1767	9.20686e-06	9.20495e-06	9.20776e-06	8.97551e-06	8.96903e-06	8.97197e-06	9.05543e-06	9.04479e-06	9.03949e-06
2176.16	8.18031	2.76243e-06	2.79371e-06	2.79907e-06	2.62518e-06	2.63718e-06	2.64554e-06	2.71379e-06	2.70328e-06	2.73129e-06
2184.59	8.18392	8.4675e-07	8.5798e-07	8.62214e-07	7.85722e-07	7.69263e-07	7.79294e-07	8.06428e-07	7.97441e-07	8.41951e-07
2193.01	8.18753	6.94416e-07	7.46472e-07	7.61149e-07	6.46451e-07	6.54052e-07	6.38933e-07	6.82439e-07	6.40081e-07	7.02534e-07
2201.44	8.19114	1.4618e-07	1.74164e-07	1.80111e-07	1.19067e-07	1.2609e-07	1.374e-07	1.39791e-07	1.39102e-07	1.72321e-07
2209.87	8.19475	2.6958e-07	2.45233e-07	2.60222e-07	2.61844e-07	2.23453e-07	2.57627e-07	2.2125e-07	2.75651e-07	2.58387e-07
2218.3	8.19837	2.17576e-07	2.03596e-07	1.75032e-07	2.02018e-07	2.00349e-07	2.03511e-07	1.66416e-07	2.44183e-07	2.22761e-07
2226.72	8.20198	1.63725e-07	2.36879e-07	1.56484e-07	1.58683e-07	1.64093e-07	1.59958e-07	1.79128e-07	1.80082e-07	1.5626e-07
2235.15	8.20559	8.28085e-08	6.28653e-08	5.377e-08	3.94314e-08	7.27755e-08	5.04055e-08	6.70057e-08	5.19562e-08	3.55487e-08
2243.58	8.2092	5.06824e-08	3.79281e-08	4.44918e-08	4.4763e-08	6.67798e-08	5.08213e-08	3.76873e-08	4.6569e-08	2.19008e-08
2252.01	8.21281	1.92428e-07	1.73234e-07	1.71438e-07	1.76704e-07	2.0488e-07	1.77095e-07	1.83957e-07	1.87029e-07	1.96855e-07
2260.43	8.21642	8.65768e-08	1.50739e-07	1.02389e-07	1.27124e-07	1.10177e-07	1.40601e-07	1.28699e-07	9.33536e-08	1.20515e-07
2268.86	8.22004	4.3501e-08	6.18102e-08	4.23312e-08	3.09825e-08	2.14214e-08	4.45966e-08	5.34888e-08	1.93513e-08	5.85591e-08
2277.29	8.22365	5.40504e-08	1.19309e-07	8.41297e-08	6.00709e-08	3.31877e-08	5.68653e-08	6.74386e-08	1.06572e-07	7.37598e-08
2285.71	8.22726	2.13805e-08	1.63683e-08	2.26492e-08	3.83627e-08	4.64059e-09	2.62721e-08	3.66235e-08	7.95224e-09	7.5412e-08
2294.14	8.23087	2.77145e-08	2.37814e-09	4.24326e-08	8.68352e-09	9.22456e-09	1.39265e-08	3.88875e-08	2.48169e-12	3.00401e-08
2302.57	8.23448	8.55922e-10	2.15695e-12	9.78609e-10	2.95581e-08	2.30982e-09	1.78657e-08	2.94583e-10	0	6.69447e-09
2311	8.23809	0	0	1.37137e-27	4.93713e-09	2.16349e-08	3.72783e-09	0	0	3.10858e-08
2319.42	8.24171	0	0	0	4.14959e-12	1.70223e-08	2.28251e-12	0	0	1.06382e-08
2327.85	8.24532	0	0	0	0	3.37281e-10	0	0	0	2.4434e-11
2336.28	8.24893	2.74505e-11	0	0	0	0	0	0	0	0
2344.71	8.25254	5.80754e-09	0	0	0	0	0	2.59446e-12	0	0
2353.13	8.25615	4.97573e-09	3.9417e-13	0	0	0	0	2.44796e-09	0	0
2361.56	8.25976	6.89215e-12	2.22602e-09	0	0	0	0	7.30588e-09	0	0
2369.99	8.26338	0	4.53526e-08	0	0	0	0	7.37966e-11	0	0
2378.41	8.26699	0	1.05983e-08	0	0	0	0	0	0	0
2386.84	8.2706	0	3.88771e-11	3.91855e-11	0	0	0	0	0	0
2395.27	8.27421	0	0	2.18539e-09	5.18732e-11	0	3.176e-10	6.23919e-10	0	0
2403.7	8.27782	0	0	3.79931e-10	7.69373e-09	0	2.25171e-08	1.86881e-08	0	8.66108e-13
2412.12	8.28143	0	6.33629e-28	4.2675e-10	1.14975e-08	0	5.98077e-09	1.97239e-09	0	2.13263e-10
2420.55	8.28505	0	4.63222e-24	4.33666e-09	2.45359e-08	0	1.27601e-09	3.97635e-13	1.23926e-13	7.38634e-10
2428.98	8.28866	3.91055e-11	1.46088e-24	9.59391e-11	1.21924e-09	0	1.52094e-08	6.93306e-11	1.63349e-10	3.06715e-08
2437.41	8.29227	1.08106e-08	5.00746e-26	1.23906e-14	2.76164e-09	0	9.05347e-09	1.30455e-08	1.5603e-09	1.19245e-08
2445.83	8.29588	1.13069e-08	4.06837e-10	0	3.17455e-08	5.21083e-14	4.98678e-08	2.49744e-08	2.7116e-08	1.59875e-11
2454.26	8.29949	1.67634e-10	3.54391e-08	3.30659e-10	1.22222e-09	2.49915e-10	3.05299e-08	2.65257e-08	5.28546e-08	3.18995e-14
2462.69	8.3031	2.51313e-08	4.59061e-08	3.80967e-08	2.2044e-09	8.29413e-09	4.45628e-08	2.05625e-08	3.12399e-08	2.0362e-10
2471.11	8.30672	1.0613e-07	1.7685e-07	3.55148e-08	8.48792e-08	5.84184e-08	1.21815e-07	7.96984e-08	9.72602e-08	9.74331e-09
2479.54	8.31033	1.20958e-06	9.25978e-07	5.16608e-07	8.9781e-07	6.31309e-07	4.52642e-07	9.39207e-07	7.91125e-07	4.19902e-07
2487.97	8.31394	4.82201e-06	4.87802e-06	5.04643e-06	3.84979e-06	3.80581e-06	3.86144e-06	4.19236e-06	4.27002e-06	4.33341e-06
2496.4	8.31755	2.01662e-06	2.00258e-06	2.16201e-06	1.83205e-06	1.88413e-06	1.95465e-06	1.79672e-06	1.84655e-06	1.89782e-06
2504.82	8.32116	1.45779e-06	1.42644e-06	1.54427e-06	1.30943e-06	1.43107e-06	1.42008e-06	1.45035e-06	1.35753e-06	1.44017e-06
2513.25	8.32477	1.58562e-06	1.5336e-06	1.35311e-06	1.30763e-06	1.27563e-06	1.16795e-06	1.49021e-06	1.42321e-06	1.22808e-06
