# Supplementary material for: Towards global carbon transparency: Spaceborne imaging spectroscopy enables precise CO2 emission quantification at facility scale
Source: Research Square preprint supplement (doi:10.21203/rs.3.rs-5913782/v1), 2025-01-29
Supplement: Supplementary file 15 [file CO2_k_v10.xlsx]

## Sheet: k_ZY1E
Wavelength	FWHM	k_Summer_L	k_Summer_M	k_Summer_H	k_Winter_L	k_Winter_M	k_Winter_H	k_1976_L	k_1976_M	k_1976_H
1005.6	16.26	0	0	0	0	0	0	0	0	0	0	0	0	0	0	0	0	0
1022.21	16.26	0	0	0	0	0	0	0	0	0	0	0	0	0	0	0	0	0
1039.19	16.26	3.52384e-07	2.80401e-07	3.0119e-07	3.01874e-07	3.22688e-07	3.14318e-07	3.24074e-07	2.98644e-07	2.9041e-07	2.8896e-07	2.88001e-07	2.85185e-07	2.76869e-07	2.70074e-07	2.59658e-07	2.42446e-07	2.29142e-07
1055.87	16.26	7.47349e-07	6.04109e-07	6.29721e-07	6.13194e-07	6.31553e-07	5.93599e-07	5.71528e-07	5.50085e-07	5.0631e-07	4.72496e-07	3.97376e-07	3.41299e-07	2.85504e-07	1.79423e-07	3.34922e-09	-1.98225e-07	-3.14466e-07
1072.55	16.26	9.03509e-08	7.64772e-08	4.98666e-08	6.4998e-08	8.14553e-08	7.31244e-08	7.86196e-08	7.56927e-08	6.94834e-08	7.3247e-08	7.8967e-08	7.30444e-08	7.27339e-08	7.36229e-08	6.2175e-08	5.76285e-08	4.73228e-08
1089.23	16.26	2.14101e-09	0	3.31738e-09	1.58438e-09	5.84625e-10	1.64013e-09	1.41981e-09	9.64122e-10	1.55875e-09	1.24315e-09	-3.52257e-10	1.81272e-10	-2.84247e-09	7.81305e-10	1.18723e-09	1.74581e-09	-4.37748e-09
1105.91	16.26	0	4.04629e-10	4.06104e-10	8.29773e-10	9.60587e-10	-1.24666e-10	1.09271e-09	0	0	0	2.27806e-09	0	-2.65817e-10	0	1.55851e-09	8.32943e-10	0
1122.59	16.26	-1.8892e-10	4.28304e-10	3.82799e-10	1.53604e-09	-5.42431e-10	-1.08366e-09	0	1.37819e-25	1.09605e-09	3.40565e-09	3.58667e-10	6.77211e-10	2.8312e-10	9.85855e-10	2.59626e-09	6.9547e-09	-1.13276e-09
1139.44	16.26	0	0	1.423e-09	0	9.74193e-11	5.48467e-10	-1.56888e-10	0	-1.53168e-09	2.00907e-10	-8.19598e-10	0	-9.83268e-10	0	0	-1.47749e-24	0
1156.41	16.26	0	6.46809e-10	0	2.27819e-10	3.48324e-10	-2.70439e-10	0	0	0	0	0	1.74276e-09	0	0	0	1.88857e-09	-4.34731e-09
1173.29	16.26	2.17016e-09	0	0	0	0	0	0	2.03327e-09	1.51149e-09	0	0	0	0	0	0	0	0
1190.17	16.26	0	0	1.39714e-09	-1.70719e-10	3.58178e-09	1.96836e-10	-5.97501e-10	0	1.26941e-09	0	0	0	-4.62166e-10	-1.55774e-09	0	0	0
1207.04	16.26	2.51728e-05	2.28476e-05	2.27393e-05	2.26196e-05	2.25432e-05	2.24312e-05	2.23235e-05	2.21366e-05	2.19723e-05	2.17845e-05	2.15163e-05	2.12968e-05	2.07833e-05	2.01324e-05	1.95993e-05	1.7878e-05	1.75575e-05
1223.92	16.26	1.73746e-05	1.55262e-05	1.54448e-05	1.53646e-05	1.52919e-05	1.52076e-05	1.51383e-05	1.49994e-05	1.48512e-05	1.4751e-05	1.45691e-05	1.44654e-05	1.40938e-05	1.3599e-05	1.3216e-05	1.17411e-05	1.18172e-05
1240.8	16.26	5.46769e-07	4.84843e-07	4.77668e-07	4.75703e-07	4.58183e-07	4.64714e-07	4.62993e-07	4.58354e-07	4.65026e-07	4.49849e-07	4.38845e-07	4.40204e-07	4.18947e-07	3.99359e-07	3.97914e-07	3.69577e-07	3.62905e-07
1257.4	16.26	2.23553e-07	2.07335e-07	1.95274e-07	2.02025e-07	2.02338e-07	1.83936e-07	1.9717e-07	1.87279e-07	1.92882e-07	1.8692e-07	1.7766e-07	1.96007e-07	1.97137e-07	1.78941e-07	1.77007e-07	1.37091e-07	2.21509e-07
1274.15	16.26	1.4784e-08	1.80072e-08	1.5622e-08	1.61734e-08	7.96015e-09	1.32533e-08	1.03634e-08	1.29803e-08	1.59806e-08	1.64127e-08	1.73506e-08	2.24236e-08	1.52819e-08	1.22097e-08	1.24575e-08	1.87659e-08	7.45016e-09
1290.9	16.26	1.50992e-06	1.21879e-06	1.2248e-06	1.20262e-06	1.20282e-06	1.20127e-06	1.2171e-06	1.1937e-06	1.23595e-06	1.19113e-06	1.2377e-06	1.23939e-06	1.22496e-06	1.15149e-06	7.98469e-07	9.93186e-08	-6.97822e-07
1307.65	16.26	1.53643e-06	1.38708e-06	1.3813e-06	1.3649e-06	1.37362e-06	1.36089e-06	1.3705e-06	1.35733e-06	1.33802e-06	1.34668e-06	1.34131e-06	1.32288e-06	1.28732e-06	1.21927e-06	1.19376e-06	1.32688e-06	1.45972e-06
1324.4	16.26	2.77113e-06	2.56785e-06	2.56929e-06	2.56515e-06	2.55363e-06	2.55192e-06	2.5344e-06	2.52768e-06	2.50433e-06	2.4801e-06	2.48461e-06	2.4254e-06	2.34303e-06	2.28746e-06	2.33198e-06	2.51125e-06	2.7648e-06
1341.16	16.26	2.82797e-06	2.72836e-06	2.75302e-06	2.74811e-06	2.73928e-06	2.72736e-06	2.72787e-06	2.69763e-06	2.6837e-06	2.64576e-06	2.62791e-06	2.61711e-06	2.64075e-06	2.59197e-06	2.67539e-06	2.72164e-06	2.77524e-06
1357.91	16.26	2.48958e-07	1.24162e-07	1.1876e-07	1.15342e-07	1.12814e-07	1.32735e-07	1.53591e-07	9.61077e-08	1.13626e-07	1.2121e-07	1.23125e-07	1.37089e-07	1.52281e-07	1.06404e-07	1.2976e-07	1.34643e-07	1.40404e-07
1374.87	16.26	4.41599e-07	5.05185e-07	5.14592e-07	5.09891e-07	4.90393e-07	5.45364e-07	5.42319e-07	5.05949e-07	5.7755e-07	4.96859e-07	5.29966e-07	5.18651e-07	5.29448e-07	5.31767e-07	5.55669e-07	5.98584e-07	6.20186e-07
1391.65	16.26	9.58995e-09	3.01405e-08	6.3776e-09	3.72045e-09	1.69538e-08	1.14311e-09	3.23552e-09	2.62204e-09	9.42854e-09	6.82157e-09	9.96616e-09	2.99968e-09	6.28872e-09	8.28884e-09	1.10058e-08	1.15582e-08	4.84779e-09
1408.49	16.26	1.29091e-10	3.0186e-10	-3.10538e-10	-1.85123e-10	1.79679e-09	1.73128e-08	-5.45723e-09	3.81521e-09	2.11717e-08	-2.64013e-09	-1.81989e-09	-2.85846e-09	-3.98068e-09	7.35998e-10	-1.35933e-08	-4.64902e-09	-4.15267e-09
1425.33	16.26	5.33893e-05	4.77476e-05	4.75326e-05	4.73299e-05	4.71643e-05	4.69787e-05	4.68039e-05	4.64225e-05	4.60417e-05	4.56516e-05	4.48539e-05	4.40176e-05	4.3074e-05	4.16301e-05	3.88004e-05	3.56504e-05	3.24596e-05
1442.17	16.26	0.00015504	0.000134233	0.000133724	0.000133104	0.00013256	0.000131981	0.000131416	0.000130266	0.00012914	0.000127964	0.000125756	0.000123499	0.000120797	0.000116638	0.000109395	0.000101411	9.40303e-05
1459.01	16.26	1.42426e-06	1.30713e-06	1.31575e-06	1.29887e-06	1.29321e-06	1.30325e-06	1.27306e-06	1.29208e-06	1.27912e-06	1.27498e-06	1.28008e-06	1.29381e-06	1.29194e-06	1.30852e-06	1.33207e-06	1.37644e-06	1.45904e-06
1475.85	16.26	9.30977e-06	9.29704e-06	9.29583e-06	9.28414e-06	9.31325e-06	9.29465e-06	9.2961e-06	9.31948e-06	9.29606e-06	9.30777e-06	9.34482e-06	9.37251e-06	9.44815e-06	9.60915e-06	1.00166e-05	1.03713e-05	1.09532e-05
1492.7	16.26	2.4431e-06	2.12018e-06	2.11907e-06	2.07404e-06	2.07206e-06	2.01465e-06	2.0052e-06	1.98622e-06	1.87749e-06	1.82723e-06	1.74927e-06	1.68302e-06	1.61564e-06	1.44419e-06	1.51444e-06	1.12741e-06	9.71621e-07
1509.54	16.26	5.73815e-08	6.80073e-08	6.36055e-08	6.60235e-08	8.30919e-08	7.25446e-08	5.78008e-08	6.56403e-08	6.85948e-08	8.29564e-08	5.9222e-08	5.47692e-08	5.89972e-08	6.0508e-08	9.07054e-08	6.66218e-08	9.00612e-08
1526.38	16.26	9.16382e-06	8.04312e-06	7.98033e-06	7.92319e-06	7.8855e-06	7.8104e-06	7.70674e-06	7.62683e-06	7.42803e-06	7.27258e-06	7.21878e-06	7.16392e-06	6.84903e-06	6.64847e-06	6.32355e-06	4.05886e-06	4.1387e-06
1543.22	16.26	2.05109e-05	1.89285e-05	1.88449e-05	1.87463e-05	1.86501e-05	1.85598e-05	1.84805e-05	1.83362e-05	1.82071e-05	1.80787e-05	1.78927e-05	1.78423e-05	1.72888e-05	1.6574e-05	1.6438e-05	1.35877e-05	1.39971e-05
1560.06	16.26	1.7291e-06	1.43189e-06	1.39722e-06	1.38749e-06	1.37512e-06	1.33956e-06	1.32755e-06	1.30944e-06	1.33499e-06	1.37833e-06	1.36241e-06	1.34575e-06	1.25153e-06	1.12124e-06	1.05436e-06	1.15504e-06	1.85683e-06
1576.9	16.26	0.000178088	0.00018931	0.000188275	0.000187302	0.000186346	0.000185391	0.00018458	0.000182718	0.000181097	0.000179663	0.000177019	0.000175025	0.000170488	0.000164188	0.000154837	0.000135498	0.000126795
1593.71	16.26	3.32403e-05	3.36441e-05	3.34796e-05	3.33339e-05	3.3135e-05	3.29923e-05	3.27919e-05	3.2537e-05	3.23106e-05	3.20456e-05	3.17078e-05	3.15327e-05	3.05512e-05	2.90998e-05	2.70508e-05	2.21982e-05	2.11152e-05
1610.39	16.26	0.00013911	0.000149642	0.0001489	0.000148043	0.000147309	0.000146635	0.000145837	0.000144566	0.000143262	0.00014242	0.000140242	0.000138652	0.000135008	0.000129177	0.000123036	0.000104781	9.86189e-05
1627.13	16.26	4.69595e-06	3.92583e-06	3.8693e-06	3.77762e-06	3.65383e-06	3.6183e-06	3.4055e-06	3.29825e-06	2.9668e-06	2.96027e-06	2.84733e-06	2.65166e-06	2.38075e-06	1.85952e-06	9.8717e-07	-2.10118e-07	-8.7344e-07
1644.01	16.26	3.00949e-05	2.78582e-05	2.7721e-05	2.75994e-05	2.74292e-05	2.73083e-05	2.71581e-05	2.69404e-05	2.67841e-05	2.66716e-05	2.65329e-05	2.67212e-05	2.5861e-05	2.47739e-05	2.40577e-05	1.97884e-05	2.23679e-05
1660.89	16.26	3.99255e-06	3.48066e-06	3.4043e-06	3.3486e-06	3.29143e-06	3.23418e-06	3.3147e-06	3.18666e-06	3.18354e-06	3.11467e-06	3.12577e-06	3.1977e-06	2.99126e-06	2.58564e-06	2.65752e-06	1.99666e-06	2.4449e-06
1677.77	16.26	4.2603e-07	3.72049e-07	3.72623e-07	3.76636e-07	3.70456e-07	3.68402e-07	3.34675e-07	3.40279e-07	3.46902e-07	3.46137e-07	3.30558e-07	2.96454e-07	3.3791e-07	3.14291e-07	3.04929e-07	2.20335e-07	3.10207e-07
1694.65	16.26	3.52008e-08	2.65712e-08	2.62082e-08	2.00238e-08	3.4976e-08	3.17095e-08	4.50294e-08	2.0476e-08	3.28636e-08	5.69671e-08	5.18337e-08	0	2.73734e-08	2.61851e-08	4.0218e-08	1.24615e-08	1.44469e-08
1711.53	16.26	1.76113e-08	7.25676e-09	2.22751e-08	1.22409e-08	2.84195e-08	2.41973e-08	3.36033e-09	1.77189e-09	3.51895e-08	1.85943e-08	8.07252e-10	4.44831e-08	6.14344e-09	1.34644e-08	9.604e-09	1.42043e-08	2.12545e-08
1728.41	16.26	1.73603e-09	3.89392e-09	1.29049e-08	-3.18193e-09	1.47372e-08	7.07124e-09	2.93571e-09	6.5894e-09	1.15198e-08	1.33074e-09	4.39062e-09	-1.83006e-08	6.43651e-10	0	1.24868e-08	1.47997e-08	1.61841e-08
1745.28	16.26	0	0	-2.19313e-09	3.94779e-09	0	0	-1.08366e-09	0	-4.34618e-09	0	-1.0836e-08	0	0	0	1.12955e-08	-7.35508e-10	-6.46985e-09
1762.16	16.26	2.12402e-07	1.68675e-07	1.73055e-07	1.76197e-07	1.73015e-07	1.6733e-07	1.51862e-07	1.58123e-07	2.33206e-07	1.20131e-07	1.45054e-07	2.15036e-07	1.30171e-07	2.88838e-07	1.80592e-07	1.49929e-07	1.84253e-07
1778.85	16.26	3.1312e-08	4.60094e-08	4.23828e-08	4.23221e-08	5.69408e-08	7.68068e-08	1.94812e-08	2.65116e-08	3.86308e-08	3.89768e-08	9.16184e-09	3.56492e-08	2.71235e-08	4.01812e-08	3.1235e-08	3.39248e-08	5.24345e-08
1795.43	16.26	1.49503e-07	1.39183e-07	1.40075e-07	1.24313e-07	1.26405e-07	1.57435e-07	1.6574e-07	1.77124e-07	1.56327e-07	1.06592e-07	1.60639e-07	1.14344e-07	8.77258e-08	1.52936e-07	1.44918e-07	1.77848e-07	1.65884e-07
1812.02	16.26	3.49141e-09	2.46518e-08	6.57314e-09	1.00615e-08	1.75341e-08	2.28328e-08	4.22526e-08	2.3686e-09	2.83669e-09	6.97634e-08	3.56116e-09	2.03649e-08	7.2528e-09	1.4579e-08	1.42961e-08	3.13788e-08	2.45088e-08
1828.82	16.26	1.21523e-08	6.03927e-08	7.27307e-08	6.08735e-08	6.23326e-08	6.38335e-08	7.59662e-08	5.73558e-08	5.98706e-08	6.14602e-08	5.62393e-08	7.88373e-08	7.04061e-08	9.62058e-08	7.94593e-08	8.03359e-08	7.96589e-08
1845.62	16.26	-1.59262e-08	-4.67706e-08	-4.68297e-08	-2.86018e-08	-2.86425e-08	-3.02156e-08	-3.02638e-08	-2.97097e-08	-2.98246e-08	-3.19465e-08	-3.22697e-08	-3.26695e-08	-7.33965e-09	-3.10634e-08	-3.32624e-08	-3.66673e-08	-3.98854e-08
1862.42	16.26	3.47431e-07	5.96732e-07	5.71701e-07	6.09007e-07	5.75655e-07	5.84946e-07	5.80774e-07	5.91039e-07	5.84348e-07	5.94996e-07	6.04513e-07	6.18118e-07	6.17131e-07	6.40232e-07	7.14766e-07	7.81912e-07	8.60088e-07
1880.13	16.26	4.70113e-05	3.60153e-05	3.59607e-05	3.58696e-05	3.58664e-05	3.5764e-05	3.57583e-05	3.5598e-05	3.54811e-05	3.53309e-05	3.50164e-05	3.47101e-05	3.43775e-05	3.38099e-05	3.27421e-05	3.16442e-05	3.092e-05
1896.11	16.26	8.1118e-06	9.1406e-06	9.14504e-06	9.14258e-06	9.17127e-06	9.18118e-06	9.19834e-06	9.15948e-06	9.19787e-06	9.2178e-06	9.29689e-06	9.38825e-06	9.52985e-06	9.72363e-06	1.03048e-05	1.11978e-05	1.21812e-05
1912.97	16.26	1.00374e-06	2.00744e-06	1.98815e-06	1.97646e-06	2.0214e-06	1.99215e-06	2.00943e-06	2.0094e-06	2.05206e-06	1.97848e-06	2.11875e-06	2.10553e-06	2.17892e-06	2.23092e-06	2.53725e-06	2.76678e-06	3.00909e-06
1929.93	16.26	2.87364e-06	2.24134e-06	2.21375e-06	2.24525e-06	2.17123e-06	2.25985e-06	2.13974e-06	2.20095e-06	2.11966e-06	2.17895e-06	2.15899e-06	2.1375e-06	2.16669e-06	2.17496e-06	2.16949e-06	2.44834e-06	2.64853e-06
1946.82	16.26	0.000612957	0.000474166	0.000471065	0.000468086	0.000465009	0.000462008	0.000458917	0.000452728	0.000446537	0.000440285	0.000427617	0.000414769	0.000401386	0.000380258	0.000341029	0.000301019	0.000261912
1963.72	16.26	0.00102935	0.00088324	0.000879046	0.00087487	0.000870545	0.000866366	0.000862039	0.000853334	0.000844679	0.000835968	0.000818373	0.000800336	0.000781174	0.000750706	0.00069231	0.000629752	0.000566247
1980.61	16.26	0.000124145	0.000121197	0.000120499	0.000119905	0.000119387	0.000118729	0.000118204	0.000116894	0.000115917	0.000114909	0.000112772	0.00011085	0.000107984	0.000103182	9.48484e-05	8.14628e-05	7.2688e-05
1997.51	16.26	0.000544122	0.000498906	0.000498242	0.000497431	0.000496728	0.000496124	0.000495479	0.000494072	0.000492629	0.000491154	0.000488032	0.000484827	0.000480481	0.000472874	0.000455192	0.000432103	0.00041043
2014.4	16.26	0.00232852	0.00190212	0.00189209	0.00188199	0.00187183	0.00186157	0.00185119	0.00183021	0.00180889	0.00178705	0.00174182	0.00169416	0.00164794	0.00157182	0.0014174	0.00126401	0.00110273
2031.3	16.26	0.000385853	0.000357929	0.000355878	0.000353845	0.000351926	0.000349963	0.000348075	0.000344291	0.000340771	0.0003373	0.000331009	0.000325149	0.000316449	0.000303818	0.000283103	0.000245831	0.000230584
2048.13	16.26	0.000592576	0.000569192	0.000566641	0.000563952	0.000561505	0.000559134	0.00055652	0.000551486	0.000546096	0.000540806	0.000530518	0.000520302	0.000509301	0.000491599	0.000455877	0.000411867	0.000375384
2064.9	16.26	0.000781859	0.000726086	0.000722266	0.000718517	0.000714749	0.000710988	0.000707254	0.000699608	0.000691982	0.000684004	0.000667899	0.000651087	0.000635707	0.000610432	0.000559386	0.000507263	0.000453387
2081.61	16.26	0.000358894	0.00034316	0.000341256	0.000339317	0.000337424	0.000335586	0.000333735	0.000330321	0.000327319	0.000324058	0.000318747	0.000314487	0.00030562	0.000292361	0.000272192	0.000233575	0.00022139
2098.45	16.26	8.36007e-05	7.5761e-05	7.51794e-05	7.48007e-05	7.43527e-05	7.38384e-05	7.34379e-05	7.26144e-05	7.23315e-05	7.19516e-05	7.19185e-05	7.20198e-05	6.92519e-05	6.59862e-05	6.30261e-05	4.29894e-05	5.91855e-05
2115.29	16.26	2.05222e-05	1.80223e-05	1.79093e-05	1.76061e-05	1.75451e-05	1.71403e-05	1.69896e-05	1.68175e-05	1.64765e-05	1.59999e-05	1.56313e-05	1.56347e-05	1.48944e-05	1.38484e-05	1.09641e-05	3.52048e-06	1.87544e-06
2132.13	16.26	2.13475e-06	1.83854e-06	1.82705e-06	1.71893e-06	1.76754e-06	1.57318e-06	1.60851e-06	1.51746e-06	1.52725e-06	1.61915e-06	1.47677e-06	1.45778e-06	1.31768e-06	1.08967e-06	8.63129e-07	-9.35132e-07	-4.13294e-07
2148.97	16.26	1.25701e-05	1.10267e-05	1.10288e-05	1.05935e-05	1.07128e-05	1.03551e-05	1.03123e-05	1.00442e-05	9.719e-06	9.36072e-06	8.95239e-06	8.69495e-06	8.66361e-06	9.40253e-06	1.3443e-05	1.34866e-05	2.24102e-05
2165.81	16.26	1.05731e-05	9.0725e-06	8.89762e-06	8.92735e-06	8.66502e-06	8.58506e-06	8.44572e-06	8.17091e-06	7.94499e-06	7.6461e-06	7.10071e-06	6.81853e-06	5.93849e-06	4.29589e-06	1.48847e-06	1.72136e-06	9.76011e-06
2182.64	16.26	1.06546e-06	8.98951e-07	7.87426e-07	8.64257e-07	9.42396e-07	9.00801e-07	8.59257e-07	8.66226e-07	7.76766e-07	6.84336e-07	7.95082e-07	7.65177e-07	7.13177e-07	6.26297e-07	5.46834e-07	-3.31713e-08	-8.16602e-10
2199.48	16.26	2.72693e-07	2.28563e-07	2.49627e-07	2.40141e-07	3.28172e-07	2.02786e-07	2.35079e-07	4.48617e-07	4.0788e-07	2.07294e-07	2.34544e-07	2.47248e-07	2.09835e-07	2.14264e-07	2.9407e-07	1.96108e-07	3.19702e-07
2216.32	16.26	2.65288e-07	3.11268e-07	2.03727e-07	1.78589e-07	2.17009e-07	2.32257e-07	2.84705e-07	3.54877e-07	1.75863e-07	3.38479e-07	2.12903e-07	2.25839e-07	2.01127e-07	1.9798e-07	2.53976e-07	1.74566e-07	3.43203e-07
2233.16	16.26	6.35088e-08	1.51643e-07	2.05124e-07	1.21726e-07	7.96956e-08	3.73641e-08	1.24136e-07	7.84028e-08	5.76578e-08	2.27173e-08	8.16082e-08	7.55754e-08	7.11324e-08	4.76153e-08	5.19018e-08	2.25026e-08	4.25895e-08
2250	16.26	1.82133e-07	7.22051e-08	8.39883e-08	1.64251e-07	1.48087e-07	1.33636e-07	7.15895e-08	1.32236e-07	1.75013e-07	1.70155e-07	1.16754e-07	1.29834e-07	1.1818e-07	1.15044e-07	1.52253e-07	7.32279e-08	7.20225e-08
2266.84	16.26	1.71261e-08	8.88471e-08	3.03431e-08	2.31602e-08	5.75233e-08	9.25037e-08	8.65831e-08	4.71467e-08	4.5628e-08	4.7709e-08	4.41144e-08	4.82633e-08	5.61286e-08	4.96367e-08	3.89857e-08	2.4487e-08	7.21253e-08
2283.67	16.26	3.37374e-08	-2.27368e-26	7.38429e-08	5.80067e-09	4.86605e-09	3.7712e-08	6.5709e-09	3.01755e-08	4.12898e-08	3.26084e-08	2.15506e-08	4.28817e-08	5.70821e-09	2.62373e-08	6.07909e-08	-7.07203e-09	-2.23887e-09
2300.51	16.26	1.63496e-08	8.12397e-09	0	1.35224e-09	-1.38946e-08	2.07536e-09	2.31497e-09	6.11773e-09	1.34392e-08	4.68122e-09	8.89403e-09	6.18319e-09	-4.84243e-09	9.90301e-09	1.9791e-08	1.9437e-08	3.7692e-08
2317.35	16.26	0	3.10951e-09	0	0	9.20237e-09	2.9706e-08	0	1.89355e-08	2.52783e-09	1.16917e-08	-1.22019e-11	5.94765e-09	1.09505e-08	1.65963e-08	5.27167e-09	8.86961e-08	3.3921e-08
2334.19	16.26	0	0	0	0	0	3.45611e-09	0	0	3.58216e-09	1.94277e-24	0	2.63666e-09	4.18815e-09	-2.91554e-08	-1.52121e-08	0	5.85682e-09
2350.4	16.26	0	0	0	0	-2.39753e-09	3.23126e-09	0	4.83844e-09	-6.64515e-09	0	0	0	0	4.1878e-09	0	-5.12701e-08	-1.167e-09
2366.68	16.26	0	0	1.38122e-09	5.32821e-09	7.52835e-10	0	0	-1.53832e-09	0	4.34523e-09	5.24565e-09	0	1.3541e-08	0	1.35041e-23	5.8597e-09	1.42723e-09
2384.12	16.26	0	-1.09629e-09	0	0	0	3.1294e-09	-5.4146e-10	2.95205e-09	1.1038e-08	1.09855e-09	1.01408e-09	-6.79549e-25	-7.51504e-09	-1.02887e-08	-1.34598e-08	-6.49293e-09	-7.24079e-09
2400.81	16.26	0	0	0	3.71193e-09	0	4.27535e-09	6.7007e-09	2.37442e-09	0	-2.66666e-09	0	-1.34505e-09	1.2081e-08	4.27629e-09	-5.48946e-09	-7.64521e-25	1.62079e-08
2417.5	16.26	0	8.34804e-09	5.74839e-09	-1.87306e-09	7.23399e-09	3.5285e-09	0	6.31199e-09	-7.25926e-10	1.03473e-08	5.25214e-09	0	6.22225e-09	-3.39046e-09	-1.64592e-08	-5.71493e-09	2.01882e-08
2434.19	16.26	1.64539e-08	3.85455e-09	3.93893e-09	0	2.2202e-08	1.37841e-08	8.21403e-09	-3.39404e-09	1.48161e-08	-1.17401e-09	3.11079e-09	2.10802e-09	2.45424e-08	6.1501e-09	1.48992e-08	-5.69846e-09	-6.13506e-09
2450.88	16.26	0	2.30746e-09	6.9335e-09	1.01618e-08	0	7.25757e-09	1.18394e-08	1.11866e-08	0	1.14012e-08	9.63975e-25	6.82865e-09	0	0	3.70704e-09	2.14284e-09	-6.23693e-09
2467.57	16.26	3.20979e-08	7.21996e-08	4.02366e-08	1.65406e-08	5.1626e-08	5.98743e-08	4.75728e-08	3.65854e-08	5.47312e-08	3.11631e-08	2.94958e-08	2.42655e-08	5.43345e-08	4.75437e-08	2.41817e-08	6.5485e-08	3.89647e-08
2484.32	16.26	2.69438e-06	2.87776e-06	2.89784e-06	2.8806e-06	2.92246e-06	2.88217e-06	2.90129e-06	2.9072e-06	2.97279e-06	3.05946e-06	3.01967e-06	3.12994e-06	3.08764e-06	3.2226e-06	3.83947e-06	4.907e-06	6.49794e-06
2501.08	16.26	1.71995e-06	1.50963e-06	1.52009e-06	1.55773e-06	1.52238e-06	1.52207e-06	1.49145e-06	1.50453e-06	1.5167e-06	1.4787e-06	1.47628e-06	1.4806e-06	1.48941e-06	1.49507e-06	1.47901e-06	1.62804e-06	1.78032e-06

## Sheet: k_ZY1F
Wavelength	FWHM	k_Summer_L	k_Summer_M	k_Summer_H	k_Winter_L	k_Winter_M	k_Winter_H	k_1976_L	k_1976_M	k_1976_H
1009.7	16.848	0	0	0	0	0	0	0	0	0	0	0	0	0	0	0	0	0
1026.55	16.846	0	0	0	0	0	0	0	0	0	0	0	0	0	0	0	0	0
1043.4	16.846	6.10131e-07	4.53636e-07	5.003e-07	4.85397e-07	5.03134e-07	5.09321e-07	4.93378e-07	4.67159e-07	4.45626e-07	4.33818e-07	4.03561e-07	3.84235e-07	3.36087e-07	2.64523e-07	1.4464e-07	2.39482e-08	-4.22306e-08
1060.24	16.849	3.57914e-07	3.17398e-07	3.14056e-07	3.10012e-07	3.25027e-07	2.89796e-07	2.91664e-07	2.8195e-07	2.68528e-07	2.48636e-07	2.27566e-07	2.01614e-07	1.93867e-07	1.66036e-07	1.29424e-07	6.45022e-08	3.00341e-08
1077.09	16.845	2.66111e-08	1.34843e-08	7.37041e-09	1.66106e-08	2.57446e-08	1.84008e-08	2.28605e-08	1.92138e-08	1.43277e-08	1.91686e-08	2.2708e-08	1.57458e-08	1.81062e-08	1.9977e-08	1.49681e-08	1.37793e-08	1.29337e-08
1093.94	16.845	1.9958e-09	0	2.86788e-09	2.03117e-09	6.1359e-10	5.706e-10	1.35392e-09	8.04194e-10	1.42958e-09	1.24066e-09	9.9327e-10	2.16142e-09	-2.21711e-09	1.87449e-09	1.35051e-09	-5.04456e-09	0
1110.78	16.848	7.40456e-11	6.68597e-10	9.3257e-10	1.50258e-09	3.94251e-10	-8.79333e-10	1.15348e-09	6.5166e-26	3.44065e-10	1.51103e-09	1.11583e-09	0	-1.59665e-10	0	6.05952e-09	1.06907e-08	-9.00191e-10
1127.63	16.848	-2.06021e-10	7.69109e-10	1.25178e-09	0	1.88789e-09	6.66016e-10	1.62252e-10	1.13922e-24	1.74398e-09	2.8242e-09	-5.31523e-10	1.10784e-09	4.03498e-10	2.5533e-09	0	-7.0325e-25	0
1144.48	16.845	0	6.44109e-10	0	0	3.8576e-10	0	0	0	-1.48561e-09	0	-1.60835e-11	1.53912e-09	0	0	0	1.76978e-09	0
1161.32	16.849	0	0	0	1.38428e-10	0	-4.04687e-10	0	0	1.49156e-09	0	0	0	0	0	0	0	-7.0374e-09
1178.17	16.845	1.35471e-09	0	0	0	0	0	0	1.17222e-09	0	0	0	0	0	0	0	0	0
1195.02	16.848	2.90198e-07	2.51651e-07	2.51988e-07	2.51775e-07	2.50191e-07	2.50699e-07	2.44473e-07	2.40731e-07	2.40267e-07	2.37841e-07	2.33281e-07	2.28511e-07	2.25651e-07	2.1306e-07	2.07095e-07	1.77439e-07	1.79666e-07
1211.86	16.845	2.42197e-05	2.19071e-05	2.18e-05	2.16781e-05	2.16012e-05	2.14746e-05	2.13805e-05	2.11843e-05	2.10081e-05	2.0826e-05	2.05542e-05	2.03496e-05	1.98736e-05	1.92844e-05	1.88594e-05	1.69969e-05	1.66269e-05
1228.71	16.848	7.96988e-06	7.08277e-06	7.04426e-06	7.00704e-06	6.97117e-06	6.93101e-06	6.8946e-06	6.8305e-06	6.75489e-06	6.70493e-06	6.61878e-06	6.57325e-06	6.37954e-06	6.10703e-06	5.88621e-06	5.15095e-06	5.27026e-06
1245.56	16.848	2.38073e-07	2.05196e-07	2.00354e-07	1.98878e-07	1.93956e-07	1.94821e-07	1.93732e-07	1.87753e-07	1.99149e-07	1.90605e-07	1.82885e-07	1.89991e-07	1.72821e-07	1.63505e-07	1.66371e-07	1.5857e-07	1.70911e-07
1262.4	16.846	2.07877e-07	2.0357e-07	1.93245e-07	1.9654e-07	1.84736e-07	1.82133e-07	1.97837e-07	1.86831e-07	1.86827e-07	1.74704e-07	1.72604e-07	1.79307e-07	1.99695e-07	1.7946e-07	1.7218e-07	1.45871e-07	1.9535e-07
1279.25	16.845	3.41244e-08	2.19459e-08	2.14029e-08	2.34581e-08	2.52368e-08	2.45096e-08	1.82701e-08	1.87973e-08	2.28151e-08	2.21526e-08	2.76396e-08	2.38862e-08	2.29885e-08	2.30219e-08	1.48754e-08	2.82994e-08	2.51756e-08
1296.09	16.849	1.35296e-06	1.06732e-06	1.07502e-06	1.0558e-06	1.05316e-06	1.04428e-06	1.07619e-06	1.05516e-06	1.0826e-06	1.05371e-06	1.09882e-06	1.08006e-06	1.05608e-06	9.49224e-07	5.40283e-07	-1.15519e-07	-7.90945e-07
1312.94	16.845	4.50154e-06	4.16175e-06	4.1512e-06	4.1232e-06	4.13171e-06	4.10761e-06	4.102e-06	4.08072e-06	4.05031e-06	4.0431e-06	4.01848e-06	3.9817e-06	3.87617e-06	3.74413e-06	3.68186e-06	3.95168e-06	4.56766e-06
1329.79	16.846	7.73046e-07	6.82704e-07	6.96643e-07	6.86544e-07	6.92373e-07	6.81001e-07	6.73149e-07	6.45269e-07	6.5748e-07	6.13559e-07	6.3003e-07	5.90595e-07	5.5704e-07	5.15754e-07	5.57057e-07	5.47292e-07	3.54953e-07
1346.63	16.848	2.58962e-06	2.1897e-06	2.19193e-06	2.19175e-06	2.16247e-06	2.16434e-06	2.17933e-06	2.1477e-06	2.1158e-06	2.08983e-06	2.05795e-06	2.03081e-06	2.05742e-06	1.94745e-06	1.95383e-06	1.89447e-06	1.93466e-06
1363.48	16.848	2.52822e-07	3.06564e-07	3.10869e-07	3.11281e-07	3.08768e-07	3.15136e-07	3.16702e-07	3.13786e-07	3.08349e-07	3.13968e-07	3.12477e-07	3.15039e-07	3.13911e-07	3.16225e-07	3.23521e-07	3.35554e-07	3.53677e-07
1380.33	16.845	2.59728e-07	2.27106e-07	2.37917e-07	2.37313e-07	2.14229e-07	2.55234e-07	2.44851e-07	2.19686e-07	2.7748e-07	2.14821e-07	2.44988e-07	2.33387e-07	2.41447e-07	2.35971e-07	2.44554e-07	2.62124e-07	2.702e-07
1397.17	16.848	-1.15844e-09	1.6386e-08	-4.16624e-10	-1.77071e-09	5.27111e-09	-1.11997e-09	9.18823e-10	2.54338e-09	6.85357e-09	2.88294e-09	5.50536e-10	4.20758e-10	-4.6871e-09	2.26077e-09	2.17784e-09	3.76332e-09	-8.71373e-09
1414.02	16.848	9.67528e-11	4.53646e-09	-1.082e-09	4.51578e-13	9.791e-10	1.22365e-08	-1.1311e-08	1.02895e-08	1.69457e-08	-2.44218e-09	-3.33382e-09	-4.03988e-09	-1.47694e-09	-2.00296e-10	-1.3878e-08	-1.51436e-09	-2.01732e-10
1430.87	16.845	0.000157452	0.000141041	0.000140486	0.000139908	0.000139396	0.000138831	0.000138304	0.000137128	0.000136025	0.000134837	0.000132432	0.000129922	0.000127112	0.000122652	0.000114255	0.000104905	9.55012e-05
1447.71	16.846	5.786e-05	5.07045e-05	5.05847e-05	5.03721e-05	5.02063e-05	5.00553e-05	4.98595e-05	4.95719e-05	4.92655e-05	4.89447e-05	4.84164e-05	4.79079e-05	4.71459e-05	4.60356e-05	4.42398e-05	4.22489e-05	4.07072e-05
1464.56	16.846	2.03144e-06	1.91188e-06	1.90955e-06	1.91464e-06	1.91101e-06	1.918e-06	1.90908e-06	1.93734e-06	1.91727e-06	1.90354e-06	1.93303e-06	1.93131e-06	1.90077e-06	1.93495e-06	1.92205e-06	1.92967e-06	1.98941e-06
1481.41	16.846	5.56191e-06	5.73147e-06	5.7331e-06	5.71135e-06	5.74859e-06	5.72711e-06	5.73884e-06	5.74705e-06	5.76065e-06	5.75448e-06	5.79162e-06	5.82371e-06	5.90387e-06	5.99186e-06	6.38819e-06	6.6373e-06	7.12498e-06
1498.25	16.849	2.20731e-06	1.96985e-06	1.95279e-06	1.94408e-06	1.91343e-06	1.8786e-06	1.85688e-06	1.8528e-06	1.75428e-06	1.71372e-06	1.66507e-06	1.58006e-06	1.50798e-06	1.39061e-06	1.47456e-06	1.10695e-06	9.57012e-07
1515.1	16.844	6.8027e-08	6.20806e-08	6.86181e-08	5.02368e-08	8.763e-08	6.95041e-08	5.95761e-08	5.21669e-08	5.17193e-08	5.75794e-08	5.70975e-08	2.89004e-08	6.55456e-08	3.97846e-08	6.64738e-08	3.3848e-08	4.57493e-08
1531.94	16.848	2.33314e-05	2.11569e-05	2.10152e-05	2.09091e-05	2.07904e-05	2.06603e-05	2.05033e-05	2.0327e-05	2.00417e-05	1.98458e-05	1.96781e-05	1.96729e-05	1.89456e-05	1.82172e-05	1.75832e-05	1.37348e-05	1.43932e-05
1548.79	16.848	7.4313e-06	6.74953e-06	6.73176e-06	6.67845e-06	6.65751e-06	6.60904e-06	6.5935e-06	6.53676e-06	6.48953e-06	6.41764e-06	6.29531e-06	6.24222e-06	6.0074e-06	5.75088e-06	5.92816e-06	4.67201e-06	4.63101e-06
1565.64	16.846	6.60451e-05	6.8187e-05	6.77922e-05	6.74657e-05	6.7121e-05	6.67113e-05	6.64437e-05	6.57377e-05	6.52218e-05	6.47373e-05	6.38656e-05	6.3035e-05	6.12443e-05	5.8681e-05	5.49882e-05	4.88438e-05	4.70708e-05
1582.49	16.845	9.16837e-05	9.59089e-05	9.53733e-05	9.48731e-05	9.43612e-05	9.39341e-05	9.34717e-05	9.25816e-05	9.17839e-05	9.10745e-05	8.97024e-05	8.87433e-05	8.65341e-05	8.34442e-05	7.92852e-05	6.8835e-05	6.5336e-05
1599.33	16.848	0.000105279	0.000112654	0.000112112	0.000111582	0.000111042	0.000110489	0.000110002	0.000109037	0.000108162	0.00010739	0.000105947	0.000104952	0.0001021	9.76001e-05	9.13386e-05	7.77837e-05	7.25441e-05
1616.18	16.846	6.5073e-05	6.69192e-05	6.64541e-05	6.6087e-05	6.56661e-05	6.53677e-05	6.48566e-05	6.42422e-05	6.35035e-05	6.30924e-05	6.18983e-05	6.10348e-05	5.92879e-05	5.69161e-05	5.51921e-05	4.62409e-05	4.44259e-05
1633.03	16.846	7.63705e-06	6.91609e-06	6.94594e-06	6.78929e-06	6.68529e-06	6.66575e-06	6.4996e-06	6.4035e-06	6.21667e-06	6.15301e-06	6.08047e-06	6.01916e-06	5.79533e-06	5.19987e-06	4.279e-06	1.76754e-06	1.63128e-06
1649.87	16.848	2.44974e-05	2.27633e-05	2.26548e-05	2.25659e-05	2.24733e-05	2.23348e-05	2.23086e-05	2.21477e-05	2.20334e-05	2.19541e-05	2.19248e-05	2.21559e-05	2.14027e-05	2.04382e-05	2.02524e-05	1.73351e-05	1.99928e-05
1666.72	16.845	1.94786e-06	1.71307e-06	1.67229e-06	1.65271e-06	1.58732e-06	1.60269e-06	1.60287e-06	1.53081e-06	1.53147e-06	1.52524e-06	1.56512e-06	1.61936e-06	1.47427e-06	1.24209e-06	1.0398e-06	4.21398e-07	4.69175e-07
1683.56	16.849	1.93316e-07	1.65575e-07	1.66674e-07	1.68924e-07	1.77302e-07	1.73031e-07	1.54748e-07	1.28724e-07	1.60342e-07	1.6497e-07	1.34733e-07	9.63552e-08	1.24863e-07	1.39982e-07	1.42884e-07	9.94003e-08	1.36437e-07
1700.41	16.845	1.4089e-08	1.14888e-08	1.52512e-08	1.01269e-08	1.98256e-08	2.10291e-08	1.67023e-08	1.71907e-08	7.8306e-09	2.31947e-08	4.56495e-08	7.55979e-09	3.09e-08	-1.00032e-08	1.05234e-08	-2.36876e-11	3.05855e-09
1717.26	16.846	1.31316e-08	1.08252e-08	1.42596e-08	2.13924e-09	3.15252e-08	1.91829e-08	2.23066e-09	-1.15708e-09	3.85019e-08	6.5725e-09	-5.48462e-10	2.36511e-08	8.57876e-09	8.03033e-09	1.15597e-08	4.59614e-09	2.17779e-08
1734.1	16.849	0	0	1.81231e-09	-2.54633e-09	-1.01037e-09	0	0	0	0	7.12907e-10	-1.30758e-08	-2.03486e-08	-1.79626e-09	0	1.37675e-08	1.23679e-08	2.47648e-09
1750.95	16.845	1.21084e-07	1.04108e-07	1.11614e-07	1.07772e-07	9.89438e-08	9.80318e-08	1.10394e-07	1.10257e-07	1.08366e-07	8.35832e-08	1.01592e-07	9.96038e-08	7.47626e-08	9.85822e-08	1.17838e-07	9.97601e-08	1.22602e-07
1767.8	16.845	1.11402e-07	9.9644e-08	9.50424e-08	1.02624e-07	1.04383e-07	1.00754e-07	6.40826e-08	7.9544e-08	1.5625e-07	8.45228e-08	7.48921e-08	1.0768e-07	7.61742e-08	2.0109e-07	9.20277e-08	7.38704e-08	1.04477e-07
1784.64	16.849	1.35984e-07	1.21106e-07	1.45584e-07	1.14381e-07	1.28412e-07	1.48156e-07	1.2149e-07	1.40109e-07	1.23324e-07	1.32302e-07	1.21731e-07	9.56653e-08	6.88562e-08	1.49264e-07	1.25881e-07	1.41077e-07	1.72191e-07
1801.49	16.845	6.70071e-08	9.55511e-08	5.55594e-08	9.37178e-08	8.40825e-08	8.94546e-08	1.33581e-07	9.01063e-08	9.53178e-08	9.42195e-08	4.62664e-08	1.03095e-07	5.88618e-08	8.69825e-08	8.14172e-08	1.23633e-07	9.22575e-08
1818.34	16.846	5.8998e-09	9.07089e-09	-1.07352e-08	-1.06522e-08	-1.02082e-08	-6.75553e-09	-1.75347e-08	-1.73558e-08	-1.36286e-08	-1.78198e-08	-1.78067e-08	-1.20174e-08	-2.52971e-08	-8.60029e-09	-1.52918e-08	-3.55998e-08	-2.96067e-08
1835.18	16.849	4.14097e-08	4.82528e-08	5.0084e-08	6.72527e-08	6.46767e-08	6.74078e-08	6.7493e-08	5.56862e-08	5.69619e-08	6.42934e-08	4.22991e-08	7.02345e-08	7.23331e-08	7.4169e-08	5.99767e-08	7.31846e-08	6.00991e-08
1852.03	16.846	-3.7309e-08	-6.43539e-08	-6.77982e-08	-6.4793e-08	-6.48797e-08	-6.64357e-08	-6.65361e-08	-6.61242e-08	-6.67543e-08	-6.66412e-08	-6.70429e-08	-6.78487e-08	-5.33375e-08	-6.90293e-08	-7.38777e-08	-8.25242e-08	-8.97791e-08
1868.88	16.845	3.36573e-06	6.45415e-06	6.40863e-06	6.45232e-06	6.42757e-06	6.47463e-06	6.49112e-06	6.49232e-06	6.52262e-06	6.55294e-06	6.64256e-06	6.72294e-06	6.83355e-06	7.04178e-06	7.50932e-06	8.16465e-06	8.76843e-06
1885.72	16.848	3.46525e-05	2.88867e-05	2.88712e-05	2.8818e-05	2.88062e-05	2.87265e-05	2.87262e-05	2.86512e-05	2.85734e-05	2.84748e-05	2.82783e-05	2.81202e-05	2.79252e-05	2.76128e-05	2.7091e-05	2.66783e-05	2.65216e-05
1902.57	16.845	3.3819e-06	4.44856e-06	4.42187e-06	4.43971e-06	4.49469e-06	4.48177e-06	4.48437e-06	4.46711e-06	4.4915e-06	4.49198e-06	4.55953e-06	4.65286e-06	4.69273e-06	4.83506e-06	5.17576e-06	5.67312e-06	6.13922e-06
1919.41	16.848	5.54943e-07	6.77141e-07	6.54126e-07	6.53916e-07	6.68215e-07	6.53668e-07	6.4427e-07	6.67686e-07	6.74454e-07	6.43904e-07	6.88252e-07	6.32565e-07	6.97431e-07	6.87951e-07	7.66816e-07	7.62733e-07	9.18889e-07
1936.26	16.849	7.6771e-05	4.56015e-05	4.51568e-05	4.47618e-05	4.42532e-05	4.39502e-05	4.34065e-05	4.26131e-05	4.17034e-05	4.09568e-05	3.93589e-05	3.77905e-05	3.61848e-05	3.39039e-05	3.03172e-05	2.74402e-05	2.52282e-05
1953.11	16.845	0.00107792	0.00087492	0.000870138	0.000865467	0.00086074	0.000855998	0.000851144	0.000841418	0.00083157	0.000821538	0.000801092	0.000779999	0.000757902	0.000722177	0.000652909	0.000579681	0.000507691
1969.96	16.845	0.000615253	0.000559266	0.0005568	0.000554443	0.000551938	0.000549598	0.000547083	0.00054215	0.000537228	0.000532342	0.000522349	0.000512253	0.000500919	0.000482874	0.000448138	0.000409743	0.000369761
1986.8	16.846	5.7458e-05	5.22275e-05	5.20302e-05	5.16985e-05	5.16268e-05	5.1373e-05	5.13271e-05	5.08777e-05	5.08003e-05	5.07107e-05	5.06287e-05	5.10354e-05	5.00861e-05	4.86532e-05	4.79716e-05	4.3218e-05	4.69477e-05
2003.65	16.846	0.0019578	0.00166939	0.00166218	0.00165503	0.00164764	0.00164031	0.00163281	0.00161754	0.00160176	0.00158557	0.00155164	0.00151529	0.00147929	0.00141904	0.00129247	0.00115989	0.0010245
2020.49	16.848	0.00122985	0.00108051	0.00107574	0.001071	0.00106617	0.00106138	0.00105649	0.00104663	0.00103677	0.00102661	0.00100567	0.000983679	0.000961948	0.000926023	0.000852642	0.000775534	0.000690062
2037.34	16.846	0.000299392	0.000284365	0.000282876	0.000281202	0.000279801	0.000278331	0.000276857	0.000274218	0.00027171	0.000269458	0.000265852	0.000263677	0.000256978	0.000247588	0.000234793	0.000200221	0.000197708
2054.19	16.848	0.000854087	0.000808447	0.000804536	0.000800574	0.00079666	0.000792916	0.000788957	0.000780701	0.000772456	0.000763749	0.000746298	0.000727487	0.000710961	0.000683706	0.000626651	0.000571197	0.000510214
2071.03	16.845	0.000711665	0.00066639	0.000663006	0.000659529	0.000656115	0.000652764	0.000649328	0.000642651	0.000635889	0.000628895	0.000614757	0.000600222	0.000586162	0.000563492	0.000518709	0.000468261	0.000418905
2087.88	16.846	0.000251861	0.000235161	0.000233667	0.000232188	0.000230698	0.000229262	0.000227882	0.00022518	0.000223008	0.000220594	0.000217041	0.00021483	0.000207705	0.0001979	0.000185577	0.000151904	0.000152941
2104.73	16.846	4.17225e-05	3.83836e-05	3.81487e-05	3.80721e-05	3.80057e-05	3.77056e-05	3.76057e-05	3.72763e-05	3.75001e-05	3.74189e-05	3.7994e-05	3.81871e-05	3.71089e-05	3.56875e-05	3.19865e-05	2.09518e-05	3.59883e-05
2121.57	16.849	8.75247e-06	7.28338e-06	7.22795e-06	6.93507e-06	6.87481e-06	6.4858e-06	6.39612e-06	6.22512e-06	5.90956e-06	5.65367e-06	5.31938e-06	5.15293e-06	4.44288e-06	3.63188e-06	2.79796e-06	-2.46531e-06	-3.44317e-06
2138.42	16.845	2.55522e-06	2.10849e-06	2.19146e-06	1.99736e-06	2.07706e-06	1.8376e-06	2.0058e-06	1.8462e-06	1.62339e-06	1.60822e-06	1.14162e-06	1.14859e-06	8.31486e-07	5.3871e-07	4.83272e-07	-2.48346e-07	2.11825e-06
2155.27	16.848	1.4223e-05	1.25738e-05	1.22424e-05	1.20533e-05	1.20167e-05	1.18975e-05	1.14402e-05	1.11531e-05	1.08683e-05	1.05632e-05	1.00833e-05	9.63452e-06	9.38692e-06	9.33801e-06	1.0845e-05	1.04096e-05	1.8982e-05
2172.11	16.846	5.543e-06	4.82687e-06	4.73844e-06	4.83712e-06	4.61569e-06	4.61282e-06	4.58846e-06	4.44211e-06	4.30629e-06	4.07156e-06	3.80385e-06	3.69121e-06	3.13613e-06	1.84401e-06	-1.69507e-07	-4.11419e-06	-5.35218e-06
2188.96	16.846	7.34526e-07	7.20709e-07	6.54393e-07	7.00354e-07	6.64143e-07	6.38429e-07	7.44615e-07	7.44714e-07	7.26929e-07	5.66708e-07	6.65251e-07	6.73729e-07	6.32586e-07	6.24997e-07	6.80849e-07	4.25953e-07	7.21295e-07
2205.81	16.845	2.19627e-07	1.90052e-07	1.60603e-07	1.5176e-07	2.01965e-07	1.59858e-07	1.69372e-07	3.86184e-07	1.65094e-07	1.27104e-07	1.6176e-07	1.52833e-07	1.40912e-07	1.35527e-07	1.99151e-07	1.0299e-07	2.12956e-07
2222.65	16.85	1.99078e-07	2.76164e-07	2.2455e-07	1.38461e-07	2.22045e-07	1.45519e-07	2.38116e-07	1.88989e-07	1.4672e-07	3.34853e-07	1.53973e-07	1.6582e-07	1.52563e-07	1.27066e-07	1.80812e-07	1.05875e-07	1.9154e-07
2239.5	16.846	6.19799e-08	9.17528e-09	5.7528e-08	4.50725e-08	3.40358e-08	3.14674e-08	1.86005e-09	4.09321e-08	6.45245e-09	3.55949e-08	3.42022e-08	3.62887e-08	3.20698e-08	3.18767e-08	3.84055e-08	9.72106e-09	4.03228e-08
2256.35	16.845	1.69303e-07	1.52066e-07	7.92604e-08	2.17655e-07	1.5806e-07	1.5303e-07	9.14552e-08	1.42644e-07	1.62282e-07	1.59873e-07	1.47534e-07	1.31218e-07	1.52119e-07	1.35334e-07	1.47498e-07	8.24332e-08	4.40057e-08
2273.19	16.846	3.98172e-08	1.32155e-24	9.34862e-08	7.61249e-09	1.71879e-08	4.72703e-08	5.35426e-08	7.96514e-08	4.84172e-08	3.70562e-08	3.06317e-08	5.15162e-08	2.61983e-08	5.03783e-08	4.50148e-08	-1.69953e-08	7.23438e-08
2290.04	16.848	9.24828e-09	0	0	2.00859e-09	4.29413e-09	7.30645e-09	3.38381e-09	4.92253e-09	2.80479e-08	1.58228e-08	2.12174e-09	2.87022e-08	-1.69323e-10	9.30382e-09	2.60123e-08	3.69997e-08	4.08862e-08
2306.89	16.845	1.5263e-08	1.43723e-08	0	2.07654e-09	-2.12102e-08	-2.96657e-09	0	1.515e-09	1.69633e-08	1.1201e-08	8.97202e-10	4.81636e-09	3.13208e-09	-4.43708e-09	9.15268e-09	2.37457e-08	4.5e-08
2323.73	16.848	0	3.63959e-09	0	0	1.15611e-08	2.62475e-08	0	0	6.40261e-09	4.48383e-09	2.476e-09	-1.56606e-09	-9.08621e-09	3.47962e-09	0	5.13769e-08	-2.34918e-08
2340.58	16.846	0	0	0	0	-2.26809e-09	9.11882e-09	0	4.76174e-09	-4.52265e-10	0	0	4.14214e-09	1.03391e-08	-1.43827e-08	-1.52889e-08	-2.56696e-08	8.15216e-09
2357.43	16.848	0	0	0	0	1.43024e-09	0	0	-3.64261e-09	-6.46308e-09	0	0	0	3.80584e-09	4.40093e-09	1.72297e-25	-3.53654e-08	1.03046e-09
2374.27	16.846	0	-2.04099e-09	2.17776e-09	4.72765e-09	2.27945e-09	0	0	5.92628e-09	0	6.81322e-09	3.71004e-09	0	-2.11632e-09	0	-9.59142e-25	0	-1.97336e-09
2391.12	16.845	0	0	0	1.60175e-24	0	3.73959e-09	-5.86223e-11	6.22139e-09	8.57554e-09	1.89861e-09	0	-2.41252e-24	9.97183e-09	-5.3019e-09	-2.5429e-08	-9.62175e-09	-4.32152e-09
2407.96	16.848	0	-3.15801e-26	3.19805e-09	3.92949e-09	4.81682e-09	5.55625e-09	7.77178e-09	0	0	9.27792e-10	6.14523e-09	-2.51132e-09	1.00145e-08	-3.02016e-09	8.20263e-09	-8.35224e-09	2.13046e-08
2424.81	16.848	0	-1.42028e-08	6.39913e-09	-2.19334e-09	1.62861e-08	8.90894e-09	0	5.16201e-09	5.42468e-09	9.66298e-09	-6.33466e-09	0	1.40267e-08	9.70548e-09	-2.44655e-08	1.69042e-09	7.93615e-09
2441.66	16.845	2.09094e-08	3.49004e-08	7.25642e-09	1.75789e-24	2.04315e-08	1.37663e-08	1.29813e-08	-1.50671e-09	6.92324e-09	-2.24613e-09	3.50972e-09	4.73118e-09	9.88551e-09	0	1.68556e-08	-3.85793e-09	-2.41019e-08
2458.5	16.849	0	3.80357e-25	4.31085e-09	1.28656e-08	7.48114e-09	1.19468e-08	2.21137e-08	8.49518e-09	8.56955e-09	1.7409e-08	1.38624e-08	4.58256e-09	0	1.08722e-24	1.18635e-08	3.11558e-08	1.90364e-08
2475.35	16.845	1.84741e-07	2.50903e-07	2.00485e-07	1.85263e-07	2.11567e-07	2.17887e-07	2.09934e-07	1.99205e-07	1.99745e-07	1.93364e-07	1.66118e-07	1.74094e-07	1.98613e-07	1.81967e-07	1.38419e-07	1.55187e-07	1.67545e-07
2492.2	16.846	3.30728e-06	3.26951e-06	3.26771e-06	3.25259e-06	3.29213e-06	3.27376e-06	3.24239e-06	3.23862e-06	3.33171e-06	3.37807e-06	3.35932e-06	3.42851e-06	3.4277e-06	3.54294e-06	4.00603e-06	4.99835e-06	6.3655e-06
2509.04	16.849	1.439e-06	1.13595e-06	1.16479e-06	1.21964e-06	1.15365e-06	1.15931e-06	1.17767e-06	1.20331e-06	1.17261e-06	1.12066e-06	1.12138e-06	1.15031e-06	1.15432e-06	1.1328e-06	1.10107e-06	1.19984e-06	1.31481e-06

## Sheet: k_GF5B
Wavelength	FWHM	k_Summer_L	k_Summer_M	k_Summer_H	k_Winter_L	k_Winter_M	k_Winter_H	k_1976_L	k_1976_M	k_1976_H
1009	8.546	0	0	0	0	0	0	0	0	0	0	0	0	0	0	0	0	0
1017.42	8.546	0	0	0	0	0	0	0	0	0	0	0	0	0	0	0	0	0
1025.83	8.546	0	0	0	0	0	0	0	0	0	0	0	0	0	0	0	0	0
1034.25	8.546	2.66562e-07	2.2963e-07	2.1987e-07	2.04688e-07	2.22515e-07	2.18034e-07	2.41601e-07	2.18183e-07	2.13988e-07	2.13182e-07	2.14472e-07	2.10983e-07	2.06588e-07	1.96286e-07	1.89919e-07	1.74858e-07	1.76358e-07
1042.67	8.546	2.56562e-07	1.82369e-07	2.22325e-07	2.4731e-07	2.53257e-07	2.50551e-07	2.35183e-07	2.23804e-07	2.1693e-07	2.12601e-07	2.10032e-07	2.10214e-07	2.03658e-07	2.04102e-07	1.93127e-07	1.83095e-07	1.58021e-07
1051.08	8.546	1.44618e-06	1.122e-06	1.19711e-06	1.12013e-06	1.17246e-06	1.12107e-06	1.05812e-06	1.01381e-06	9.10681e-07	8.59113e-07	6.74333e-07	5.72887e-07	4.28115e-07	1.92943e-07	-2.21264e-07	-6.71581e-07	-9.43742e-07
1059.5	8.546	1.1895e-07	1.15742e-07	1.04156e-07	1.13817e-07	1.00367e-07	1.03458e-07	1.08444e-07	1.06506e-07	1.14896e-07	9.54295e-08	1.0547e-07	9.02651e-08	9.81589e-08	8.26893e-08	9.36419e-08	7.52848e-08	7.01888e-08
1067.92	8.546	2.16155e-07	1.9165e-07	1.7614e-07	1.63146e-07	1.87263e-07	1.82642e-07	1.89722e-07	1.87783e-07	1.8245e-07	1.81536e-07	1.88478e-07	1.85683e-07	1.7297e-07	1.74363e-07	1.55426e-07	1.47359e-07	1.2337e-07
1076.33	8.546	3.16243e-08	4.2871e-09	6.68027e-09	2.06692e-08	2.87383e-08	2.10545e-08	2.36682e-08	1.8491e-08	1.53945e-08	2.05771e-08	2.22974e-08	1.69302e-08	1.97583e-08	1.89616e-08	1.70566e-08	1.91335e-08	2.30855e-08
1084.75	8.546	0	0	1.67441e-09	1.36441e-09	-1.63888e-10	3.29775e-09	0	-1.44541e-25	7.97525e-10	1.2779e-09	-8.65153e-10	-3.80234e-09	-2.83791e-09	-9.04373e-10	3.10977e-10	0	3.22712e-10
1093.17	8.546	3.37838e-09	0	4.78293e-09	2.82236e-09	2.25239e-09	1.06037e-09	2.14593e-09	1.2039e-09	2.71807e-09	2.84464e-09	0	3.41479e-09	-3.62571e-09	3.39586e-09	2.40233e-09	2.10815e-09	0
1101.58	8.546	0	2.67803e-26	0	2.08687e-09	6.24542e-10	-2.94945e-10	1.19147e-09	0	0	0	3.57691e-09	0	-5.76726e-10	0	0	-8.45971e-09	0
1110	8.546	0	1.00299e-09	9.98334e-10	-6.86243e-11	7.33595e-10	0	1.11017e-09	0	0	0	1.58299e-09	0	0	0	4.0006e-09	5.50013e-09	0
1118.42	8.546	-1.97619e-10	0	8.49196e-10	3.34485e-09	-1.03446e-09	-2.37789e-09	0	3.44092e-25	2.20166e-09	3.97563e-09	-6.14143e-25	0	-7.11284e-10	0	5.6966e-09	1.54106e-08	-2.64731e-09
1126.83	8.546	0	9.9418e-10	0	0	2.11502e-09	0	0	7.07562e-25	-2.05627e-25	3.95138e-09	8.20511e-10	1.70399e-09	1.42072e-09	3.29874e-09	0	0	0
1135.25	8.546	0	7.60003e-25	3.45196e-09	0	2.19804e-09	1.422e-09	-3.13213e-10	0	-2.22338e-09	5.14963e-10	-2.01515e-09	0	-2.37635e-09	9.36399e-10	0	-2.98723e-24	0
1143.67	8.546	0	0	0	0	0	0	0	0	0	0	0	0	0	0	0	0	0
1152.08	8.546	0	1.73998e-09	0	3.54863e-10	9.30524e-10	0	0	0	0	0	0	4.54075e-09	0	0	0	4.87315e-09	0
1160.5	8.546	0	0	0	0	0	-5.39671e-10	0	0	0	0	0	0	0	0	0	0	-8.79728e-09
1168.92	8.546	3.72882e-09	0	0	0	0	0	0	4.0968e-09	3.75829e-09	0	0	0	0	0	0	0	0
1177.33	8.546	0	0	0	0	0	0	0	0	0	0	0	0	0	0	0	0	0
1185.75	8.546	0	0	0	0	0	0	0	0	0	0	0	0	0	0	0	0	0
1194.17	8.546	0	0	3.28433e-09	-4.01465e-10	7.92442e-09	4.25247e-10	-1.31012e-09	0	2.50881e-09	0	0	0	-1.53618e-09	-3.63252e-09	0	0	0
1202.58	8.546	2.54956e-05	2.30464e-05	2.29517e-05	2.28467e-05	2.27548e-05	2.26752e-05	2.25655e-05	2.24001e-05	2.22429e-05	2.20874e-05	2.18488e-05	2.16494e-05	2.11326e-05	2.0471e-05	1.98874e-05	1.84877e-05	1.83489e-05
1211	8.546	1.71666e-05	1.55139e-05	1.54356e-05	1.53327e-05	1.53007e-05	1.51956e-05	1.51145e-05	1.49647e-05	1.4841e-05	1.46862e-05	1.44823e-05	1.43024e-05	1.39543e-05	1.35287e-05	1.32737e-05	1.16269e-05	1.12651e-05
1219.42	8.546	2.69902e-05	2.41297e-05	2.40147e-05	2.38951e-05	2.37683e-05	2.36556e-05	2.35613e-05	2.33548e-05	2.31532e-05	2.29937e-05	2.27279e-05	2.25804e-05	2.20296e-05	2.13363e-05	2.07865e-05	1.87786e-05	1.88984e-05
1227.83	8.546	6.21184e-06	5.34918e-06	5.30419e-06	5.27159e-06	5.2538e-06	5.19883e-06	5.15899e-06	5.0885e-06	5.00124e-06	4.95792e-06	4.84144e-06	4.77269e-06	4.64495e-06	4.42937e-06	4.29757e-06	3.50646e-06	3.48307e-06
1236.25	8.546	1.13497e-06	9.99367e-07	9.96571e-07	9.92165e-07	9.65241e-07	9.65017e-07	9.63671e-07	9.60901e-07	9.59315e-07	9.30984e-07	9.2668e-07	9.18103e-07	8.83402e-07	8.37184e-07	8.44121e-07	7.34088e-07	7.4593e-07
1244.67	8.546	9.37817e-08	8.13938e-08	7.08282e-08	7.48464e-08	6.43163e-08	7.7211e-08	7.57976e-08	6.87938e-08	7.52951e-08	7.29349e-08	5.76569e-08	7.13231e-08	5.50893e-08	6.51687e-08	4.63662e-08	7.46165e-08	5.84187e-08
1253.08	8.546	2.36117e-07	2.06756e-07	1.98273e-07	1.98101e-07	2.12376e-07	1.83417e-07	1.91757e-07	1.83971e-07	2.06736e-07	1.95752e-07	1.81785e-07	2.05628e-07	1.83965e-07	1.71886e-07	1.76082e-07	1.04988e-07	2.21058e-07
1261.5	8.546	2.37024e-07	2.26774e-07	2.17633e-07	2.25998e-07	2.13745e-07	2.12887e-07	2.32476e-07	2.10878e-07	2.00323e-07	1.93719e-07	1.94944e-07	2.09174e-07	2.33069e-07	1.87221e-07	2.10098e-07	1.98607e-07	2.48569e-07
1269.92	8.546	6.76455e-08	7.66093e-08	7.33287e-08	6.6016e-08	4.9908e-08	6.01839e-08	6.24105e-08	6.2099e-08	7.31651e-08	6.02683e-08	6.03225e-08	6.93465e-08	6.35716e-08	6.13677e-08	6.37683e-08	4.91543e-08	4.39437e-08
1278.33	8.546	4.33517e-09	-1.51543e-10	-3.7204e-09	2.7078e-09	-1.00173e-09	6.83568e-10	-3.74801e-09	0	0	5.0908e-09	6.9294e-09	5.72366e-09	2.46392e-09	-6.95333e-25	0	9.59359e-09	0
1286.75	8.546	7.67976e-07	6.51417e-07	6.60703e-07	6.39071e-07	6.48334e-07	6.55588e-07	6.44315e-07	6.22931e-07	6.47221e-07	5.94785e-07	5.94545e-07	5.99597e-07	6.16461e-07	5.95e-07	4.71235e-07	1.99907e-07	-1.00068e-08
1295.17	8.546	1.72483e-06	1.27399e-06	1.28468e-06	1.26538e-06	1.26417e-06	1.23562e-06	1.28673e-06	1.2747e-06	1.32691e-06	1.31351e-06	1.38058e-06	1.33135e-06	1.23946e-06	1.0187e-06	2.96788e-07	-6.3373e-07	-1.54795e-06
1303.58	8.546	2.41439e-08	1.76112e-08	1.9764e-08	1.98684e-08	1.69814e-08	1.53914e-08	3.04781e-08	2.16284e-08	8.16952e-09	1.60196e-08	2.5286e-08	5.38401e-09	1.14091e-08	8.46899e-09	-1.10165e-08	2.34935e-08	4.71857e-08
1312	8.546	4.06561e-06	3.65322e-06	3.63748e-06	3.59904e-06	3.61875e-06	3.58744e-06	3.59026e-06	3.56177e-06	3.5308e-06	3.52915e-06	3.49284e-06	3.46631e-06	3.35624e-06	3.17987e-06	3.10294e-06	3.3531e-06	3.6334e-06
1320.42	8.546	5.52864e-06	5.2174e-06	5.21079e-06	5.22516e-06	5.20489e-06	5.1975e-06	5.16438e-06	5.15349e-06	5.13391e-06	5.10845e-06	5.0806e-06	5.01571e-06	4.87062e-06	4.80393e-06	4.89594e-06	5.33423e-06	6.02549e-06
1328.83	8.546	6.36232e-08	6.85415e-08	7.47352e-08	5.04748e-08	5.71172e-08	6.58385e-08	6.27119e-08	6.44839e-08	4.93434e-08	3.19512e-08	7.64619e-08	4.40002e-08	5.90749e-08	3.4644e-08	4.12924e-08	3.47353e-08	1.521e-08
1337.25	8.546	2.73483e-06	2.81822e-06	2.84435e-06	2.84632e-06	2.84588e-06	2.81197e-06	2.81067e-06	2.76008e-06	2.76652e-06	2.70921e-06	2.68063e-06	2.69102e-06	2.70578e-06	2.70241e-06	2.87451e-06	2.9809e-06	2.99803e-06
1345.66	8.546	2.47644e-06	2.14277e-06	2.17625e-06	2.1526e-06	2.13168e-06	2.13407e-06	2.1582e-06	2.12548e-06	2.12313e-06	2.08623e-06	2.10181e-06	2.08084e-06	2.11971e-06	2.02305e-06	2.06614e-06	2.04828e-06	2.15304e-06
1354.08	8.546	3.04723e-07	1.26145e-07	1.18477e-07	1.11947e-07	1.07798e-07	1.34297e-07	1.70389e-07	7.58741e-08	1.11059e-07	1.21176e-07	1.20312e-07	1.50449e-07	1.65497e-07	9.98144e-08	1.32692e-07	1.40514e-07	1.36237e-07
1362.5	8.546	1.15671e-07	1.4072e-07	1.50378e-07	1.43269e-07	1.51201e-07	1.52356e-07	1.5036e-07	1.54185e-07	1.48558e-07	1.52615e-07	1.5204e-07	1.45887e-07	1.44516e-07	1.47628e-07	1.50731e-07	1.51601e-07	1.75716e-07
1370.91	8.546	7.46675e-07	8.24065e-07	8.32228e-07	8.37186e-07	8.40368e-07	8.37883e-07	9.10806e-07	8.46294e-07	8.9098e-07	8.37827e-07	8.50147e-07	8.54016e-07	8.48535e-07	8.8941e-07	8.91529e-07	9.39567e-07	9.56632e-07
1379.33	8.546	2.59984e-07	2.32473e-07	2.54042e-07	2.54666e-07	2.07219e-07	2.7101e-07	2.2306e-07	2.19331e-07	2.72583e-07	2.13687e-07	2.51668e-07	2.44765e-07	2.35681e-07	2.26083e-07	2.37868e-07	2.60921e-07	2.67942e-07
1387.75	8.546	2.641e-08	5.23346e-08	1.88984e-08	1.66087e-08	4.23365e-08	1.10364e-08	1.2572e-08	8.11425e-09	1.41427e-08	1.31493e-08	2.54685e-08	1.22099e-08	2.56805e-08	2.33668e-08	2.15905e-08	1.95306e-08	2.89863e-08
1396.16	8.546	-1.90387e-09	-1.4575e-09	-2.29185e-09	-3.29951e-09	-5.51096e-09	-4.22518e-09	4.56071e-10	1.9042e-09	8.91015e-09	5.09656e-09	-3.42258e-09	-4.07487e-09	-6.03707e-09	1.33254e-09	7.72109e-09	9.19247e-09	-1.30199e-08
1404.58	8.546	-9.75389e-10	3.18936e-09	-1.65766e-09	-1.666e-09	-8.69616e-11	-2.00075e-09	1.86624e-09	3.24738e-09	3.48964e-09	8.36679e-10	-6.4342e-10	3.23278e-09	-4.71324e-09	-2.00079e-10	-5.79393e-09	-4.87068e-09	-5.46931e-09
1413	8.546	2.54055e-10	-2.17053e-09	-9.14774e-11	6.81103e-10	3.16991e-09	2.48995e-08	-1.51924e-08	7.88018e-09	2.71323e-08	-3.4862e-09	-1.20087e-09	-5.01431e-09	-3.27352e-09	-1.20728e-09	-2.17338e-08	-7.45781e-09	1.15623e-09
1421.41	8.546	3.06596e-08	1.50979e-08	1.54035e-08	1.26749e-10	1.81781e-10	1.3417e-09	2.5741e-09	1.65237e-08	4.53611e-09	-3.52728e-10	-5.00046e-09	7.62591e-09	2.73808e-09	6.26684e-09	5.42235e-09	2.89032e-08	1.20142e-08
1429.83	8.546	0.000120573	0.000118721	0.000118427	0.000118164	0.000117949	0.000117705	0.00011747	0.000116911	0.000116383	0.000115797	0.000114552	0.000113164	0.000111452	0.00010871	0.000102893	9.58201e-05	8.83415e-05
1438.25	8.546	0.00027744	0.000232598	0.000231456	0.000230199	0.000229028	0.000227776	0.000226587	0.000224073	0.000221674	0.000219157	0.000214225	0.000209216	0.00020373	0.000195077	0.000180085	0.000164022	0.000148642
1446.66	8.546	6.36157e-05	5.21805e-05	5.19767e-05	5.16914e-05	5.14661e-05	5.12394e-05	5.10059e-05	5.05934e-05	5.01679e-05	4.97093e-05	4.90166e-05	4.83426e-05	4.73614e-05	4.60848e-05	4.40655e-05	4.2117e-05	4.09969e-05
1455.08	8.546	2.73048e-06	2.57454e-06	2.596e-06	2.56805e-06	2.55253e-06	2.56358e-06	2.51386e-06	2.53237e-06	2.5099e-06	2.52954e-06	2.53347e-06	2.54034e-06	2.59587e-06	2.60334e-06	2.67103e-06	2.8042e-06	2.93794e-06
1463.5	8.546	1.74741e-07	1.11977e-07	9.24757e-08	1.02153e-07	9.772e-08	1.11412e-07	1.01174e-07	1.33198e-07	1.19543e-07	9.14858e-08	1.07275e-07	1.22227e-07	7.7555e-08	1.1014e-07	5.70413e-08	6.77718e-08	9.69833e-08
1471.91	8.546	1.0354e-05	1.01896e-05	1.01929e-05	1.02088e-05	1.02142e-05	1.02166e-05	1.02315e-05	1.02876e-05	1.02117e-05	1.02736e-05	1.03134e-05	1.03416e-05	1.03688e-05	1.04728e-05	1.07199e-05	1.11699e-05	1.1816e-05
1480.33	8.546	7.85085e-06	7.80756e-06	7.80374e-06	7.78295e-06	7.82485e-06	7.78472e-06	7.78411e-06	7.77981e-06	7.81561e-06	7.76233e-06	7.80459e-06	7.81888e-06	7.89687e-06	8.02632e-06	8.50387e-06	8.68811e-06	9.15771e-06
1488.75	8.546	9.28318e-07	9.02737e-07	9.11135e-07	8.66604e-07	8.89167e-07	8.69548e-07	8.89194e-07	8.98327e-07	8.84905e-07	8.7041e-07	8.51361e-07	8.77446e-07	9.05078e-07	7.97892e-07	9.52672e-07	9.80279e-07	1.04481e-06
1497.16	8.546	3.60498e-06	3.16364e-06	3.17286e-06	3.13368e-06	3.10667e-06	3.03967e-06	3.00177e-06	2.97611e-06	2.81597e-06	2.74873e-06	2.65596e-06	2.5075e-06	2.38536e-06	2.20378e-06	2.30427e-06	1.62374e-06	1.34605e-06
1505.58	8.546	1.1699e-07	1.39238e-07	1.15908e-07	1.37389e-07	1.17354e-07	1.26636e-07	1.14231e-07	1.4517e-07	1.39684e-07	1.56259e-07	1.32039e-07	1.22623e-07	1.37353e-07	1.29395e-07	1.59843e-07	1.57235e-07	1.80746e-07
1514	8.546	1.09923e-08	2.12559e-08	2.34385e-08	1.18967e-08	5.99421e-08	2.85339e-08	1.70952e-08	0	1.44367e-08	2.5792e-08	0	1.29595e-09	-6.30218e-09	6.00238e-09	4.00622e-08	-5.9307e-09	1.5335e-08
1522.41	8.546	1.36666e-06	1.14351e-06	1.16427e-06	1.13648e-06	1.13575e-06	1.13422e-06	1.1211e-06	1.10049e-06	1.05462e-06	1.02135e-06	1.05825e-06	1.02654e-06	1.0623e-06	9.15982e-07	6.92171e-07	3.69573e-07	3.14251e-07
1530.83	8.546	2.13122e-05	1.90574e-05	1.88979e-05	1.87928e-05	1.86984e-05	1.85404e-05	1.83518e-05	1.81779e-05	1.78345e-05	1.75643e-05	1.73895e-05	1.73121e-05	1.65773e-05	1.60347e-05	1.55588e-05	1.16316e-05	1.22616e-05
1539.25	8.546	3.4381e-05	3.19367e-05	3.17546e-05	3.15876e-05	3.142e-05	3.12632e-05	3.1101e-05	3.08737e-05	3.06422e-05	3.04554e-05	3.02285e-05	3.02168e-05	2.9309e-05	2.80969e-05	2.7368e-05	2.3e-05	2.42854e-05
1547.66	8.546	3.59458e-06	2.97868e-06	3.00362e-06	2.99006e-06	2.97178e-06	2.95751e-06	2.96165e-06	2.90991e-06	2.8788e-06	2.81383e-06	2.62567e-06	2.51039e-06	2.38711e-06	2.23347e-06	2.743e-06	1.82031e-06	1.25256e-06
1556.08	8.546	3.0075e-07	2.9119e-07	2.78557e-07	2.53657e-07	2.58988e-07	2.49682e-07	2.50702e-07	2.70035e-07	2.50368e-07	2.4784e-07	2.24993e-07	2.66889e-07	2.2009e-07	2.30217e-07	1.86579e-07	1.77817e-07	2.02423e-07
1564.5	8.546	5.81271e-06	4.828e-06	4.75004e-06	4.73245e-06	4.68543e-06	4.59815e-06	4.56729e-06	4.48176e-06	4.52872e-06	4.62598e-06	4.60833e-06	4.51804e-06	4.26257e-06	3.82154e-06	3.66565e-06	3.58943e-06	5.46614e-06
1572.91	8.546	0.000215851	0.000229151	0.000227882	0.000226727	0.000225565	0.000224315	0.000223414	0.000221042	0.000219098	0.000217322	0.000214267	0.000211864	0.000206126	0.000198344	0.000186603	0.000163664	0.000153184
1581.33	8.546	0.000129121	0.000137124	0.000136379	0.000135638	0.000134914	0.0001343	0.000133624	0.000132347	0.000131146	0.000130046	0.000127871	0.000126241	0.000122952	0.000118191	0.000111195	9.65232e-05	9.09039e-05
1589.75	8.546	3.43269e-06	2.80168e-06	2.79526e-06	2.7484e-06	2.69811e-06	2.70119e-06	2.64255e-06	2.59333e-06	2.62467e-06	2.56661e-06	2.53109e-06	2.47323e-06	2.32239e-06	2.10921e-06	2.15164e-06	1.63564e-06	1.52986e-06
1598.16	8.546	8.68708e-05	9.01245e-05	8.96516e-05	8.92442e-05	8.87572e-05	8.83094e-05	8.78464e-05	8.71116e-05	8.6376e-05	8.56838e-05	8.46432e-05	8.40514e-05	8.14727e-05	7.76449e-05	7.20095e-05	5.94649e-05	5.61417e-05
1606.58	8.546	0.000183953	0.000200298	0.00019952	0.000198436	0.000197616	0.000196629	0.000195759	0.000194129	0.0001926	0.000191636	0.000188894	0.000186933	0.000182183	0.000173953	0.000164481	0.000142336	0.000132647
1615	8.546	6.71853e-05	6.69462e-05	6.63655e-05	6.5868e-05	6.53909e-05	6.51128e-05	6.45661e-05	6.38985e-05	6.31493e-05	6.26334e-05	6.15975e-05	6.09134e-05	5.91189e-05	5.6915e-05	5.67408e-05	4.49056e-05	4.4538e-05
1623.41	8.546	5.47406e-06	4.23483e-06	4.09419e-06	4.08023e-06	3.95785e-06	3.90008e-06	3.62782e-06	3.54355e-06	3.13301e-06	3.22456e-06	2.9567e-06	2.65673e-06	2.1969e-06	1.74203e-06	1.02155e-06	1.29371e-06	7.28343e-07
1631.83	8.546	4.04866e-06	3.83964e-06	3.90654e-06	3.80789e-06	3.74324e-06	3.71087e-06	3.63484e-06	3.49445e-06	3.37944e-06	3.31464e-06	3.30379e-06	3.1473e-06	2.97844e-06	2.27579e-06	1.34839e-06	-8.49622e-07	-1.39891e-06
1640.25	8.546	2.99025e-05	2.72917e-05	2.71195e-05	2.69462e-05	2.67336e-05	2.66098e-05	2.63967e-05	2.61134e-05	2.5951e-05	2.57478e-05	2.54446e-05	2.55154e-05	2.48381e-05	2.39786e-05	2.34374e-05	1.83935e-05	2.02452e-05
1648.66	8.546	2.95028e-05	2.76677e-05	2.75741e-05	2.75002e-05	2.73727e-05	2.72602e-05	2.71923e-05	2.70564e-05	2.6926e-05	2.69134e-05	2.69698e-05	2.73137e-05	2.62917e-05	2.49722e-05	2.40443e-05	2.04739e-05	2.35695e-05
1657.08	8.546	5.67406e-06	4.8912e-06	4.83366e-06	4.74142e-06	4.75428e-06	4.63189e-06	4.80359e-06	4.7267e-06	4.72373e-06	4.61362e-06	4.59555e-06	4.67973e-06	4.44136e-06	3.90202e-06	4.61759e-06	4.38238e-06	5.69824e-06
1665.5	8.546	2.57648e-06	2.25653e-06	2.17204e-06	2.16121e-06	2.05109e-06	2.08255e-06	2.05135e-06	1.93756e-06	1.94074e-06	1.89535e-06	1.94286e-06	2.04319e-06	1.84919e-06	1.59357e-06	1.11055e-06	3.25376e-07	2.62291e-07
1673.91	8.546	6.73348e-07	5.86999e-07	5.73692e-07	5.92089e-07	5.72248e-07	5.64024e-07	5.39814e-07	5.45838e-07	5.39002e-07	5.70172e-07	5.67469e-07	5.32512e-07	5.54257e-07	5.35711e-07	5.38339e-07	3.61204e-07	5.02281e-07
1682.33	8.546	1.97533e-07	1.65379e-07	1.84935e-07	1.83072e-07	1.83318e-07	2.14675e-07	1.54064e-07	1.35556e-07	1.52911e-07	1.38328e-07	1.12755e-07	9.26253e-08	1.36645e-07	7.53574e-08	1.32162e-07	1.04471e-07	1.42846e-07
1690.75	8.546	6.41347e-08	3.82383e-08	3.63828e-08	2.95642e-08	6.63443e-08	3.53188e-08	8.25499e-08	1.62352e-08	6.07283e-08	7.53517e-08	4.19085e-08	0	1.30248e-08	8.40471e-08	7.55793e-08	3.12547e-08	2.80909e-08
1699.16	8.546	4.61978e-09	1.90351e-08	1.47963e-08	8.74809e-09	1.22956e-08	2.54179e-08	3.89158e-09	1.92604e-08	1.59225e-08	2.06579e-08	8.02157e-08	0	4.11665e-08	-2.02652e-08	1.70954e-08	-1.21419e-08	1.06696e-09
1707.58	8.546	2.49323e-08	2.16769e-09	3.76496e-08	3.13669e-08	3.74305e-08	2.67516e-08	7.87612e-09	1.66278e-08	4.45939e-08	3.27364e-08	5.72105e-09	6.6792e-08	1.41151e-08	2.09553e-08	3.54705e-09	2.79738e-08	3.09629e-08
1716	8.546	1.49553e-08	1.54823e-08	-3.71614e-09	-6.702e-09	1.64754e-08	1.79917e-08	0	-1.06822e-08	9.23909e-09	-6.0714e-09	-4.60012e-09	1.57946e-08	4.87113e-09	0	1.50592e-08	-3.55687e-09	9.41788e-09
1724.41	8.546	3.99157e-09	7.78184e-09	2.34379e-08	-5.82643e-09	3.54839e-08	1.61639e-08	6.74497e-09	1.44753e-08	2.51919e-08	2.5513e-09	8.77258e-09	0	1.23272e-08	0	1.61453e-08	1.79248e-08	2.80285e-08
1732.83	8.546	0	0	1.63591e-09	0	-1.82659e-09	0	0	0	0	0	0	-3.89096e-08	1.68255e-09	0	4.68936e-09	8.6628e-09	1.13802e-08
1741.25	8.546	0	0	-4.08009e-09	-2.09407e-09	0	0	0	0	-2.12057e-08	0	-2.38298e-08	0	0	0	1.59449e-08	1.44745e-09	-7.97906e-09
1749.66	8.546	2.9592e-08	2.28585e-08	2.63679e-08	3.72328e-08	2.06804e-08	2.29997e-08	2.7301e-08	2.83303e-08	4.81057e-08	1.89876e-08	1.86883e-08	1.75753e-08	1.81249e-08	0	2.6686e-08	1.38977e-08	1.19073e-08
1758.08	8.546	2.68568e-07	2.177e-07	2.39241e-07	2.08109e-07	2.36315e-07	2.06661e-07	2.22883e-07	2.04362e-07	2.51787e-07	1.41985e-07	1.95796e-07	2.63425e-07	1.77913e-07	3.17958e-07	2.50214e-07	2.25254e-07	2.44775e-07
1766.5	8.546	1.32731e-07	1.01836e-07	9.77101e-08	1.35557e-07	8.92016e-08	9.85766e-08	7.00938e-08	9.57898e-08	1.65024e-07	9.48018e-08	6.41985e-08	1.10885e-07	7.08382e-08	2.19625e-07	1.00478e-07	6.9106e-08	1.2423e-07
1774.91	8.546	6.57318e-09	4.21901e-08	1.02932e-08	1.59663e-08	5.2527e-08	5.77004e-08	6.50103e-09	9.39723e-09	3.57755e-08	1.54309e-08	8.46115e-09	9.45876e-09	3.62842e-08	2.65412e-08	1.45925e-08	2.08994e-08	3.18341e-08
1783.33	8.546	1.02233e-07	1.15481e-07	1.14564e-07	9.16279e-08	1.05838e-07	1.40485e-07	8.45641e-08	9.31889e-08	9.73124e-08	1.50917e-07	6.06287e-08	9.96842e-08	5.28547e-08	1.25175e-07	1.26552e-07	1.49911e-07	1.84777e-07
1791.75	8.546	1.79586e-07	1.32917e-07	1.95661e-07	1.06502e-07	1.43291e-07	1.95574e-07	1.9181e-07	2.04039e-07	1.80524e-07	1.16729e-07	2.4632e-07	1.0939e-07	1.0152e-07	1.8754e-07	1.72373e-07	1.86998e-07	2.00076e-07
1800.16	8.546	8.13414e-08	1.0444e-07	6.52743e-08	1.25695e-07	6.90333e-08	6.76614e-08	1.08902e-07	6.63702e-08	1.0974e-07	5.89238e-08	4.14445e-08	1.36496e-07	5.41478e-08	8.58157e-08	7.08892e-08	1.17241e-07	7.67164e-08
1808.58	8.546	5.14309e-10	7.09082e-09	1.1675e-08	9.39309e-09	2.0504e-08	2.72385e-08	4.80286e-08	4.89389e-09	2.35572e-09	1.1606e-07	4.37337e-09	2.3165e-08	8.41765e-09	1.88122e-08	8.40649e-09	3.69734e-08	8.17037e-09
1817	8.546	1.15409e-08	1.15111e-08	-3.36629e-08	-1.44646e-08	-1.78506e-08	-2.25334e-08	-7.14812e-09	-3.29542e-08	-2.85932e-08	-3.6511e-08	-3.67035e-08	-2.72511e-08	-3.79398e-08	-4.31006e-08	-3.17934e-08	-4.89533e-08	-4.75291e-08
1825.41	8.546	1.49803e-09	1.97193e-08	3.65536e-08	1.84175e-08	2.07236e-08	2.1695e-08	4.06939e-08	1.61937e-08	2.1524e-08	1.66888e-08	2.38554e-08	3.65513e-08	2.04407e-08	5.77854e-08	4.24438e-08	2.32591e-08	2.66914e-08
1833.83	8.546	7.52402e-08	1.22277e-07	1.20783e-07	1.22527e-07	1.22666e-07	1.22812e-07	1.22969e-07	1.23314e-07	1.07386e-07	1.24151e-07	8.07309e-08	1.30208e-07	1.31967e-07	1.3547e-07	1.11499e-07	1.22458e-07	1.10913e-07
1842.25	8.546	-2.1302e-09	-4.20363e-08	-4.20891e-08	-3.82995e-09	-3.83538e-09	-3.84112e-09	-3.8472e-09	-3.86048e-09	-3.87532e-09	-7.78391e-09	-7.86238e-09	-7.95978e-09	2.21696e-08	-4.16047e-09	-4.4615e-09	-4.93759e-09	-5.39612e-09
1850.66	8.546	-5.52769e-08	-9.12566e-08	-9.13536e-08	-9.14567e-08	-9.15661e-08	-9.4687e-08	-9.48149e-08	-9.3799e-08	-9.41068e-08	-9.4451e-08	-9.52657e-08	-9.62749e-08	-9.57442e-08	-9.81555e-08	-1.0412e-07	-1.13279e-07	-1.2179e-07
1859.08	8.546	8.55833e-09	1.69458e-08	7.47863e-09	1.61295e-08	1.61543e-08	1.61806e-08	1.62086e-08	1.62697e-08	1.50723e-08	2.40698e-08	1.7429e-08	1.60517e-08	1.79711e-08	2.16605e-08	3.35608e-08	2.0348e-08	2.23802e-08
1867.5	8.546	1.24638e-06	2.26495e-06	2.20993e-06	2.28456e-06	2.21292e-06	2.23578e-06	2.227e-06	2.25778e-06	2.24512e-06	2.25693e-06	2.30275e-06	2.34144e-06	2.35764e-06	2.43465e-06	2.64972e-06	2.91759e-06	3.17329e-06
1875.91	8.546	2.44951e-05	2.41503e-05	2.41178e-05	2.40716e-05	2.41233e-05	2.41635e-05	2.42248e-05	2.41104e-05	2.4143e-05	2.41231e-05	2.41732e-05	2.41458e-05	2.42553e-05	2.43026e-05	2.45526e-05	2.50219e-05	2.55783e-05
1884.33	8.546	4.4911e-05	3.64894e-05	3.64464e-05	3.63657e-05	3.63644e-05	3.62257e-05	3.62112e-05	3.6116e-05	3.59836e-05	3.58327e-05	3.55006e-05	3.52159e-05	3.48398e-05	3.4252e-05	3.3071e-05	3.17312e-05	3.06956e-05
1892.75	8.546	7.40939e-06	1.20896e-05	1.212e-05	1.21556e-05	1.21864e-05	1.2233e-05	1.22651e-05	1.22658e-05	1.23447e-05	1.24467e-05	1.26243e-05	1.28446e-05	1.31731e-05	1.3638e-05	1.48121e-05	1.66018e-05	1.83807e-05
1901.16	8.546	3.64485e-06	4.10373e-06	4.0737e-06	4.09052e-06	4.16134e-06	4.14461e-06	4.11039e-06	4.10667e-06	4.1602e-06	4.12076e-06	4.13173e-06	4.25611e-06	4.19911e-06	4.31397e-06	4.49125e-06	4.7109e-06	5.09366e-06
1909.58	8.546	2.20861e-06	3.63497e-06	3.56524e-06	3.58335e-06	3.60812e-06	3.59051e-06	3.62723e-06	3.6193e-06	3.65953e-06	3.54101e-06	3.72204e-06	3.79125e-06	3.78607e-06	3.92721e-06	4.33685e-06	4.81922e-06	5.0836e-06
1918	8.546	5.56696e-07	6.67152e-07	6.77766e-07	6.4843e-07	7.062e-07	6.66597e-07	6.36246e-07	6.50652e-07	6.9485e-07	6.53535e-07	7.01835e-07	6.33707e-07	7.4355e-07	6.79897e-07	7.98212e-07	7.5611e-07	9.39767e-07
1926.41	8.546	4.71952e-07	5.46278e-07	5.17051e-07	5.75934e-07	5.20597e-07	5.29058e-07	5.10487e-07	5.25445e-07	5.34611e-07	5.84422e-07	5.68773e-07	5.17913e-07	5.95438e-07	5.78224e-07	5.22512e-07	7.21977e-07	8.2246e-07
1934.83	8.546	6.26068e-06	5.53583e-06	5.4937e-06	5.50271e-06	5.42163e-06	5.61243e-06	5.38237e-06	5.50257e-06	5.34306e-06	5.41593e-06	5.4406e-06	5.4546e-06	5.44315e-06	5.57878e-06	5.72954e-06	6.28877e-06	6.88159e-06
1943.25	8.546	0.000285071	0.000216858	0.000215476	0.000214147	0.000212715	0.000211433	0.000210053	0.000207267	0.000204518	0.000201807	0.000196275	0.000190743	0.000184612	0.000175256	0.000158902	0.000141707	0.000126081
1951.66	8.546	0.00106372	0.000869938	0.000864829	0.000859896	0.00085487	0.000849793	0.000844647	0.000834306	0.000823881	0.000813214	0.000791471	0.000769145	0.000746179	0.000708987	0.000637033	0.000562656	0.000488135
1960.08	8.546	0.0011266	0.000947658	0.000943296	0.000938955	0.000934565	0.000930214	0.000925668	0.00091664	0.000907489	0.000898187	0.000879219	0.000859489	0.00083791	0.000802742	0.000733455	0.00065715	0.00058133
1968.5	8.546	0.000879925	0.000763105	0.000759342	0.000755615	0.000751733	0.000748035	0.000744171	0.000736456	0.000728788	0.000721228	0.000706038	0.000690718	0.000674666	0.000649814	0.000603878	0.000556149	0.000507545
1976.91	8.546	0.000225194	0.000225701	0.000224308	0.000223128	0.000221807	0.000220591	0.000219348	0.000216799	0.000214467	0.000212125	0.000207214	0.0002025	0.000196263	0.00018624	0.000166893	0.000141753	0.000118169
1985.33	8.546	3.77332e-05	3.35391e-05	3.34009e-05	3.3219e-05	3.33019e-05	3.30765e-05	3.31555e-05	3.28161e-05	3.29157e-05	3.28994e-05	3.2911e-05	3.32146e-05	3.28051e-05	3.18176e-05	3.15811e-05	2.76503e-05	3.11305e-05
1993.75	8.546	0.00018428	0.000176342	0.000175618	0.000174678	0.000173953	0.000173329	0.000172697	0.000171356	0.000170073	0.000168879	0.000166621	0.000164825	0.000161657	0.000156809	0.000147979	0.000135563	0.000129791
2002.16	8.546	0.00261512	0.00207801	0.00206688	0.00205562	0.00204431	0.00203286	0.00202135	0.00199789	0.00197401	0.00194959	0.00189894	0.00184597	0.00179257	0.00170529	0.00153254	0.00135456	0.00118993
2010.58	8.546	0.0027546	0.00224793	0.00223563	0.0022232	0.00221063	0.002198	0.00218517	0.00215918	0.0021326	0.00210536	0.00204868	0.00198843	0.00193122	0.00183684	0.001644	0.00145456	0.00125885
2019	8.546	0.00182695	0.00152043	0.00151246	0.00150447	0.00149648	0.00148837	0.0014802	0.0014637	0.00144708	0.00143008	0.00139501	0.00135844	0.001323	0.0012647	0.00114775	0.00103283	0.000907589
2027.41	8.546	0.000536269	0.000500585	0.000497506	0.000494763	0.000491963	0.000489154	0.000486311	0.000480671	0.00047526	0.00046975	0.000458787	0.000447602	0.000435552	0.00041696	0.000380215	0.00033528	0.000293985
2035.83	8.546	0.000270178	0.000249152	0.000247896	0.000246251	0.000244896	0.00024349	0.000242195	0.000239697	0.000237426	0.000235367	0.0002324	0.000230472	0.000224106	0.000215401	0.000207083	0.000173747	0.000179623
2044.25	8.546	0.00036847	0.000368543	0.000366657	0.000364674	0.000363079	0.000361535	0.00035969	0.000356634	0.00035308	0.000350037	0.000344693	0.000340751	0.000333099	0.000321413	0.000300871	0.000262316	0.000245137
2052.66	8.546	0.00105662	0.000978793	0.000973923	0.000969002	0.000963874	0.000958905	0.00095379	0.000943089	0.000932394	0.000921172	0.000897938	0.000873028	0.000852394	0.000818751	0.000747498	0.000685191	0.000612726
2061.08	8.546	0.00072561	0.000689888	0.000686303	0.000682961	0.000679541	0.000676164	0.000672773	0.000665698	0.000658792	0.000651421	0.000637041	0.000621709	0.000607029	0.000582511	0.000532442	0.000480175	0.000425155
2069.49	8.546	0.000783255	0.000720246	0.000716288	0.000712273	0.000708356	0.00070438	0.00070044	0.000692557	0.000684632	0.000676312	0.000659132	0.000641523	0.000625873	0.000600585	0.000549389	0.000496872	0.000443218
2077.91	8.546	0.000423589	0.000411934	0.000409798	0.00040761	0.000405488	0.000403479	0.000401282	0.000397507	0.000393883	0.000390205	0.000383497	0.000377402	0.000367978	0.000353181	0.0003289	0.000286483	0.000263101
2086.33	8.546	0.000306795	0.00028974	0.00028809	0.000286309	0.000284531	0.000282799	0.000281296	0.000277989	0.00027553	0.000272482	0.000267995	0.000264822	0.000256275	0.000244097	0.000226355	0.000191184	0.000185698
2094.74	8.546	0.000124589	0.000111347	0.000110343	0.000109636	0.000108803	0.000108089	0.000107265	0.000105862	0.00010464	0.000103578	0.000102139	0.000101718	9.74938e-05	9.23405e-05	8.98797e-05	6.27267e-05	7.67814e-05
2103.16	8.546	4.38948e-05	4.12147e-05	4.10797e-05	4.10541e-05	4.10033e-05	4.06364e-05	4.06271e-05	4.0304e-05	4.08371e-05	4.08204e-05	4.19627e-05	4.19257e-05	4.02676e-05	3.84011e-05	3.53234e-05	2.20118e-05	4.0198e-05
2111.58	8.546	2.98539e-05	2.71002e-05	2.6933e-05	2.68954e-05	2.69125e-05	2.67235e-05	2.67234e-05	2.6447e-05	2.6391e-05	2.59728e-05	2.59083e-05	2.62927e-05	2.59963e-05	2.50466e-05	2.04401e-05	1.35295e-05	1.03747e-05
2119.99	8.546	9.52007e-06	7.84072e-06	7.64585e-06	7.27003e-06	7.05357e-06	6.61032e-06	6.33496e-06	6.14316e-06	5.64268e-06	5.4357e-06	4.88051e-06	4.40642e-06	3.95771e-06	3.81454e-06	4.50128e-06	-6.73487e-07	1.08306e-06
2128.41	8.546	2.60217e-06	2.22485e-06	2.1888e-06	2.02562e-06	2.11846e-06	1.82111e-06	1.78616e-06	1.68336e-06	1.68854e-06	1.68519e-06	1.63442e-06	1.55826e-06	1.35294e-06	1.02925e-06	5.75826e-07	-1.8605e-06	-1.61978e-06
2136.83	8.546	1.73019e-06	1.47418e-06	1.46599e-06	1.3736e-06	1.36866e-06	1.25469e-06	1.35058e-06	1.18043e-06	9.9518e-07	1.13701e-06	5.65002e-07	5.09441e-07	3.00285e-07	-9.93047e-08	-8.03798e-07	-3.22635e-06	-4.00267e-06
2145.24	8.546	9.08171e-06	7.55784e-06	7.8349e-06	7.2601e-06	7.50248e-06	6.9372e-06	7.26932e-06	7.05588e-06	6.65545e-06	6.34294e-06	5.92801e-06	5.87898e-06	5.6898e-06	6.47461e-06	1.09144e-05	1.50273e-05	2.89525e-05
2153.66	8.546	1.28823e-05	1.19178e-05	1.15954e-05	1.13434e-05	1.13921e-05	1.12667e-05	1.07898e-05	1.05722e-05	1.03821e-05	1.00435e-05	9.8043e-06	9.46577e-06	9.23376e-06	9.17107e-06	1.03237e-05	7.12472e-06	1.00312e-05
2162.08	8.546	1.39666e-05	1.14913e-05	1.12179e-05	1.11855e-05	1.10064e-05	1.09004e-05	1.05316e-05	1.02919e-05	9.92841e-06	9.68045e-06	8.92542e-06	8.38053e-06	7.26318e-06	5.46928e-06	2.19419e-06	9.39301e-06	2.91288e-05
2170.49	8.546	6.44972e-06	5.77929e-06	5.71344e-06	5.83146e-06	5.44096e-06	5.43009e-06	5.492e-06	5.1891e-06	5.09505e-06	4.68711e-06	4.2704e-06	4.16572e-06	3.48783e-06	1.81989e-06	-7.71897e-07	-7.41523e-06	-1.2062e-05
2178.91	8.546	1.29231e-06	1.00507e-06	8.45104e-07	9.02384e-07	1.03508e-06	1.06994e-06	8.52405e-07	8.51808e-07	7.83333e-07	7.39301e-07	8.24784e-07	7.59278e-07	6.84292e-07	5.03931e-07	3.04777e-07	-6.91267e-07	-8.57906e-07
2187.33	8.546	9.32018e-07	8.85832e-07	8.56424e-07	9.0893e-07	8.29399e-07	7.79939e-07	8.50677e-07	9.33151e-07	7.80193e-07	7.30595e-07	7.91891e-07	8.14092e-07	7.70208e-07	7.67996e-07	7.91263e-07	4.92361e-07	7.89959e-07
2195.74	8.546	3.76513e-07	3.85516e-07	4.11136e-07	3.52091e-07	4.72446e-07	3.24695e-07	4.0991e-07	6.27042e-07	6.99037e-07	3.38779e-07	3.50567e-07	3.95131e-07	3.33625e-07	3.48356e-07	4.54046e-07	3.49608e-07	5.64472e-07
2204.16	8.546	1.17848e-07	1.24044e-23	5.99619e-08	6.91567e-08	9.30162e-08	3.06375e-08	4.91081e-09	2.29042e-07	4.98872e-09	1.76722e-08	7.03845e-08	4.80973e-08	5.01751e-08	6.17238e-08	7.66758e-08	3.59755e-08	3.86125e-08
2212.58	8.546	3.39986e-07	4.17048e-07	2.89981e-07	3.03395e-07	2.37042e-07	2.87827e-07	3.95933e-07	5.25116e-07	2.31146e-07	2.88745e-07	3.05415e-07	3.09487e-07	2.91841e-07	2.81425e-07	3.59232e-07	2.60799e-07	4.68651e-07
2220.99	8.546	2.43765e-07	2.76625e-07	1.44439e-07	2.44392e-08	2.1822e-07	2.29419e-07	1.62185e-07	2.1742e-07	1.51706e-07	4.99447e-07	1.56629e-07	1.71219e-07	1.43336e-07	1.42478e-07	2.09688e-07	1.16273e-07	2.32729e-07
2229.41	8.546	7.3577e-08	2.90099e-07	2.81446e-07	2.01963e-07	1.60489e-07	7.32952e-08	2.69831e-07	1.56847e-07	1.17652e-07	4.53257e-08	1.18068e-07	1.17091e-07	1.22946e-07	5.75854e-08	7.15648e-08	1.28377e-08	9.27346e-08
2237.83	8.546	4.33074e-08	0	9.63121e-08	3.10278e-08	0	1.13613e-23	0	0	0	0	4.03294e-08	2.09273e-08	1.86048e-08	3.344e-08	2.49892e-08	3.68618e-08	-1.48766e-08
2246.24	8.546	1.1613e-07	0	5.61513e-08	4.7184e-08	7.94693e-08	1.19971e-07	8.5025e-08	9.80955e-08	9.3947e-08	1.141e-07	5.23806e-08	7.80824e-08	6.2186e-08	5.31721e-08	1.02283e-07	5.53011e-08	5.6726e-08
2254.66	8.546	2.42486e-07	1.3478e-07	1.18795e-07	2.90933e-07	2.33917e-07	1.04356e-07	5.27312e-08	2.32646e-07	2.08583e-07	2.11881e-07	1.75296e-07	1.72009e-07	1.69814e-07	1.69822e-07	1.76767e-07	7.71465e-08	7.7837e-08
2263.08	8.546	1.2889e-08	1.87394e-07	0	5.42143e-08	9.70562e-08	1.79657e-07	7.71623e-08	1.32352e-08	3.80729e-08	6.47738e-08	7.56166e-08	3.05045e-08	8.96855e-08	6.65591e-08	6.83965e-08	2.82351e-08	3.65218e-08
2271.49	8.546	3.38364e-08	1.55137e-24	6.23369e-08	8.88475e-09	2.82064e-08	1.06293e-08	9.66369e-08	9.48185e-08	6.36636e-08	3.87222e-08	2.87327e-08	7.38388e-08	3.93594e-08	4.16796e-08	2.12202e-08	2.98657e-08	1.13492e-07
2279.91	8.546	6.27756e-08	1.90261e-24	1.62631e-07	8.56003e-09	5.086e-09	7.83701e-08	1.04944e-08	6.50124e-08	3.62168e-08	4.34333e-08	4.06254e-08	5.2797e-08	7.27937e-09	5.18058e-08	1.08042e-07	-4.44137e-08	-1.49287e-08
2288.33	8.546	0	0	0	9.86514e-10	2.7191e-09	2.26954e-24	0	5.1545e-09	4.31928e-08	2.3767e-08	4.15088e-09	3.19449e-08	3.44212e-09	1.86397e-09	-1.06851e-08	4.26585e-08	1.00181e-08
2296.74	8.546	0	0	0	0	7.18747e-09	1.02204e-08	4.13218e-09	1.1023e-08	8.16781e-09	7.71018e-10	1.06573e-08	1.46213e-08	-4.08679e-09	2.24866e-08	2.65863e-08	4.41065e-08	8.63085e-08
2305.16	8.546	2.98595e-08	1.95057e-08	0	3.41395e-09	-4.12862e-08	0	0	-5.9246e-10	2.35764e-08	5.86041e-09	1.45959e-09	-2.38447e-09	-6.87608e-09	0	1.95692e-08	0	3.19796e-08
2313.58	8.546	0	0	0	0	-1.05045e-24	0	0	3.34055e-08	0	1.83528e-08	-1.09652e-08	1.34938e-08	2.78686e-08	8.36974e-09	5.91052e-09	8.75281e-08	6.62167e-08
2321.99	8.546	0	7.78174e-09	0	0	2.39417e-08	5.23682e-08	0	0	5.53867e-09	8.18267e-09	3.67091e-09	0	-5.27963e-09	2.92779e-08	0	1.09075e-07	8.86923e-25
2330.41	8.546	0	0	0	0	0	0	0	0	6.40448e-09	3.45917e-24	0	-6.29717e-24	-1.52135e-08	-3.01247e-08	0	0	6.26926e-09
2338.83	8.546	0	0	0	0	0	8.62453e-09	0	5.68139e-09	-1.63902e-09	0	0	6.99203e-09	2.18178e-08	-2.06858e-08	-3.28194e-08	0	0
2347.24	8.546	0	0	0	0	-7.9909e-09	5.51874e-09	0	0	-4.35416e-09	0	0	0	0	0	0	-7.7537e-08	0
2355.66	8.546	0	0	0	0	5.02539e-09	0	0	4.65348e-09	-1.09588e-08	0	0	0	5.65065e-24	9.64666e-09	0	-4.32471e-08	-2.90575e-09
2364.08	8.546	0	0	0	5.924e-09	-3.64368e-09	0	0	-1.24549e-08	0	0	7.41047e-09	0	1.28397e-08	0	2.48795e-24	6.89647e-09	2.40591e-11
2372.49	8.546	0	-2.51863e-09	4.61093e-09	3.95756e-09	3.64874e-09	0	0	1.06556e-08	0	1.44028e-08	0	0	8.08513e-09	0	0	0	-2.65593e-10
2380.91	8.546	0	0	0	0	0	0	0	1.45024e-09	9.96515e-09	0	2.04664e-09	0	-2.11651e-08	0	1.671e-23	0	-5.62067e-09
2389.33	8.546	0	0	0	2.1489e-24	0	5.05831e-09	-1.4709e-09	7.96789e-09	6.95026e-09	3.02906e-09	0	-1.05834e-24	8.25802e-09	-2.39806e-08	-3.65184e-08	-1.77105e-08	-6.97597e-09
2397.74	8.546	0	0	0	0	0	7.75938e-10	9.40294e-10	4.53437e-09	0	0	0	-4.54071e-24	1.13645e-08	8.56436e-09	0	-1.90827e-24	1.05018e-08
2406.16	8.546	0	0	0	7.18672e-09	0	1.03422e-08	1.57847e-08	0	0	-3.97297e-09	0	-3.99926e-09	1.94753e-08	0	-7.09681e-09	0	2.12699e-08
2414.58	8.546	0	8.15015e-09	1.08844e-08	8.00606e-25	1.15621e-08	0	0	0	3.71121e-09	5.91968e-09	2.08788e-08	0	0	-1.45445e-08	1.57337e-08	-1.41128e-08	2.20838e-08
2422.99	8.546	0	0	8.31936e-09	-4.56537e-09	8.79181e-09	7.94069e-09	0	9.95535e-09	-5.36354e-09	1.81397e-08	-1.32561e-08	0	6.09614e-09	7.03882e-09	-2.55951e-08	0	6.47143e-09
2431.41	8.546	0	-2.91789e-08	0	0	1.71387e-08	6.59397e-09	0	0	1.40799e-08	2.07637e-24	0	0	2.74181e-08	1.15723e-08	0	-7.12537e-09	4.39336e-24
2439.83	8.546	3.6132e-08	5.33205e-08	7.2356e-09	2.50989e-24	2.93738e-08	2.18331e-08	1.92264e-08	-6.10775e-09	1.07591e-08	-3.14309e-09	6.30319e-09	5.08024e-09	1.6571e-08	0	3.18828e-08	0	-2.03186e-08
2448.24	8.546	0	5.45559e-09	6.34006e-09	0	0	1.91462e-09	9.19149e-09	9.19543e-09	0	1.4842e-09	0	7.3217e-09	0	0	4.11586e-09	3.41437e-09	-2.23854e-08
2456.66	8.546	0	7.02762e-25	7.31835e-09	1.72554e-08	0	1.39835e-08	1.33362e-08	1.2548e-08	0	1.99182e-08	8.14183e-09	7.79378e-09	0	0	7.59367e-09	-8.69114e-10	1.262e-08
2465.08	8.546	4.37287e-08	3.95838e-08	2.96693e-08	6.94813e-09	5.34987e-08	4.1606e-08	4.82939e-08	2.00423e-08	5.30632e-08	2.66822e-08	1.76692e-08	2.76128e-08	4.3162e-08	2.99019e-08	3.79327e-08	1.00244e-07	5.0331e-08
2473.49	8.546	8.435e-09	1.15331e-07	2.77079e-08	3.45256e-08	3.94901e-08	7.83976e-08	6.84265e-08	5.91154e-08	6.16336e-08	2.82497e-08	3.11395e-08	2.23282e-09	1.03478e-07	4.37146e-08	3.36144e-09	1.90782e-08	6.56328e-09
2481.91	8.546	2.06344e-06	2.2499e-06	2.23377e-06	2.22412e-06	2.24874e-06	2.21312e-06	2.24173e-06	2.24081e-06	2.29515e-06	2.38792e-06	2.33079e-06	2.43294e-06	2.35512e-06	2.50836e-06	2.99152e-06	3.96596e-06	5.33412e-06
2490.33	8.546	3.83231e-06	3.56932e-06	3.62376e-06	3.56995e-06	3.62086e-06	3.57611e-06	3.55971e-06	3.5557e-06	3.61145e-06	3.64084e-06	3.58059e-06	3.67235e-06	3.59518e-06	3.69049e-06	4.22005e-06	5.08206e-06	6.38232e-06
2498.74	8.546	1.89966e-06	1.79668e-06	1.79329e-06	1.82606e-06	1.79814e-06	1.79817e-06	1.76792e-06	1.74444e-06	1.79129e-06	1.77952e-06	1.75297e-06	1.76392e-06	1.78133e-06	1.80672e-06	1.78526e-06	2.01199e-06	2.21582e-06
2507.16	8.546	1.20435e-06	9.11779e-07	9.19784e-07	9.7316e-07	9.24202e-07	9.4006e-07	9.21107e-07	9.59638e-07	9.22494e-07	8.75899e-07	9.00298e-07	9.12587e-07	9.33662e-07	8.86469e-07	9.37324e-07	1.04592e-06	1.18871e-06
2515.58	8.546	1.99935e-06	1.37454e-06	1.37343e-06	1.49358e-06	1.35187e-06	1.37694e-06	1.42726e-06	1.46225e-06	1.44605e-06	1.39418e-06	1.37354e-06	1.35087e-06	1.42081e-06	1.4856e-06	1.25533e-06	1.29717e-06	1.31585e-06

## Sheet: k_GF5A
Wavelength	FWHM	k_Summer_L	k_Summer_M	k_Summer_H	k_Winter_L	k_Winter_M	k_Winter_H	k_1976_L	k_1976_M	k_1976_H
1014.15	8.25	0	0	0	0	0	0	0	0	0	0	0	0	0	0	0	0	0
1022.56	8.25	0	0	0	0	0	0	0	0	0	0	0	0	0	0	0	0	0
1030.98	8.25	0	0	0	0	0	0	0	0	0	0	0	0	0	0	0	0	0
1039.4	8.25	6.18477e-07	4.95689e-07	5.22377e-07	5.29239e-07	5.62676e-07	5.55631e-07	5.7245e-07	5.23779e-07	5.09016e-07	5.06825e-07	5.05843e-07	5.01638e-07	4.83277e-07	4.74109e-07	4.5615e-07	4.27158e-07	4.06469e-07
1047.81	8.25	8.44716e-07	6.00461e-07	6.72749e-07	6.12447e-07	6.30704e-07	6.50471e-07	6.00603e-07	5.85229e-07	5.46034e-07	5.20143e-07	4.43911e-07	3.9816e-07	2.9032e-07	1.12616e-07	-1.77067e-07	-4.64149e-07	-6.03215e-07
1056.23	8.25	4.65991e-07	4.07839e-07	3.8915e-07	4.47574e-07	4.4755e-07	3.76214e-07	3.8895e-07	3.69119e-07	3.42637e-07	3.15587e-07	2.82661e-07	2.43765e-07	2.32034e-07	1.97945e-07	1.34675e-07	4.49451e-08	1.07415e-08
1064.65	8.25	3.17405e-07	2.69423e-07	2.80882e-07	2.45005e-07	2.6788e-07	2.68256e-07	2.57e-07	2.58194e-07	2.6273e-07	2.55991e-07	2.64008e-07	2.54252e-07	2.48748e-07	2.3381e-07	2.21959e-07	2.014e-07	1.87899e-07
1073.06	8.25	4.82948e-08	2.99182e-08	8.7633e-09	2.53036e-08	4.23145e-08	2.97001e-08	4.11802e-08	3.3912e-08	2.24051e-08	3.08827e-08	4.19502e-08	2.81728e-08	4.36432e-08	3.92894e-08	2.75082e-08	2.37494e-08	1.17349e-08
1081.48	8.25	2.30957e-09	0	4.27819e-09	3.55589e-09	6.7523e-09	5.22975e-09	2.6247e-09	3.41869e-09	3.30417e-09	3.87664e-09	2.20873e-09	1.55112e-09	-5.08111e-09	-8.03542e-10	4.17519e-09	4.86945e-25	1.10589e-08
1089.9	8.25	3.94714e-09	0	3.96357e-09	1.78459e-09	3.16645e-10	8.90429e-10	2.19026e-09	1.90317e-09	2.67322e-09	-1.65614e-10	0	3.03623e-09	-2.70573e-09	5.69397e-10	-2.3743e-25	3.43171e-09	0
1098.31	8.25	0	0	1.81597e-09	1.46388e-09	-9.14927e-10	1.70269e-10	5.89177e-10	0	0	1.25311e-09	2.36002e-09	1.33495e-09	-9.65587e-10	1.54359e-09	1.76379e-09	-1.5206e-08	0
1106.73	8.25	0	0	0	0	7.39624e-10	0	7.71713e-10	0	0	0	0	0	0	0	0	0	0
1115.15	8.25	2.46234e-10	1.28048e-09	2.13458e-09	4.43115e-09	-1.6676e-10	-2.73635e-09	1.39992e-09	1.96876e-25	1.19225e-09	4.56887e-09	2.266e-09	0	-4.37906e-10	0	1.44669e-08	2.79092e-08	-2.62486e-09
1123.56	8.25	-4.77563e-10	0	0	0	0	0	0	0	0	0	0	0	0	0	0	0	0
1131.98	8.25	0	1.55262e-09	2.97177e-09	0	4.10218e-09	1.70403e-09	5.25929e-10	2.5469e-24	3.93899e-09	5.00992e-09	-1.57453e-09	1.88525e-09	6.43329e-10	5.197e-09	0	-2.9914e-24	0
1140.4	8.25	0	0	0	0	0	0	0	0	-3.04578e-09	0	0	0	0	0	0	0	0
1148.81	8.25	0	1.73419e-09	0	0	8.92762e-10	0	0	0	0	0	0	3.9923e-09	0	0	0	4.61735e-09	0
1157.23	8.25	0	0	0	3.59648e-10	0	0	0	0	0	0	0	0	0	0	0	0	0
1165.65	8.25	0	0	0	0	0	-7.53252e-10	0	0	3.63619e-09	0	0	0	0	0	0	0	-1.43149e-08
1174.06	8.25	3.04901e-09	0	0	0	0	0	0	0	0	0	0	0	0	0	0	0	0
1182.48	8.25	0	0	0	0	0	0	0	0	0	0	0	0	0	0	0	0	0
1190.9	8.25	0	0	0	-2.2059e-10	2.09144e-09	3.15999e-10	-9.37575e-10	0	0	0	0	0	-2.98533e-09	0	0	0	0
1199.31	8.25	6.07671e-07	5.30341e-07	5.29791e-07	5.3228e-07	5.22411e-07	5.29143e-07	5.16767e-07	5.07109e-07	5.05734e-07	5.01518e-07	4.91953e-07	4.82056e-07	4.8187e-07	4.50215e-07	4.3669e-07	3.71689e-07	3.7962e-07
1207.73	8.25	3.76407e-05	3.43747e-05	3.42058e-05	3.40325e-05	3.39412e-05	3.37686e-05	3.36166e-05	3.33656e-05	3.31499e-05	3.28642e-05	3.2472e-05	3.21613e-05	3.13522e-05	3.03154e-05	2.94081e-05	2.69605e-05	2.64433e-05
1216.15	8.25	1.47145e-05	1.29249e-05	1.28542e-05	1.27737e-05	1.27005e-05	1.2605e-05	1.25609e-05	1.23995e-05	1.22453e-05	1.21391e-05	1.19407e-05	1.18206e-05	1.15111e-05	1.11259e-05	1.07914e-05	9.42259e-06	9.23019e-06
1224.56	8.25	1.61974e-05	1.43934e-05	1.43182e-05	1.42417e-05	1.41873e-05	1.41034e-05	1.40361e-05	1.39104e-05	1.37549e-05	1.368e-05	1.35276e-05	1.34387e-05	1.30224e-05	1.24789e-05	1.1952e-05	1.05449e-05	1.07658e-05
1232.98	8.25	1.63292e-06	1.42019e-06	1.41384e-06	1.40773e-06	1.37773e-06	1.3806e-06	1.37554e-06	1.36288e-06	1.35863e-06	1.32412e-06	1.30733e-06	1.30859e-06	1.26687e-06	1.19664e-06	1.18641e-06	1.02022e-06	1.03772e-06
1241.4	8.25	3.78645e-07	3.34506e-07	3.18107e-07	3.19888e-07	3.03828e-07	3.11541e-07	3.06732e-07	3.03525e-07	3.20153e-07	3.01694e-07	2.91e-07	2.89603e-07	2.78253e-07	2.50655e-07	2.6127e-07	2.69035e-07	2.43025e-07
1249.81	8.25	1.58503e-07	1.28503e-07	1.35013e-07	1.2993e-07	1.38641e-07	1.27429e-07	1.29009e-07	1.21938e-07	1.28911e-07	1.25882e-07	1.22935e-07	1.36433e-07	1.15741e-07	1.14036e-07	1.25235e-07	8.8156e-08	1.35452e-07
1258.23	8.25	1.93703e-07	1.96513e-07	1.66774e-07	1.81993e-07	1.81089e-07	1.59118e-07	1.70012e-07	1.65759e-07	1.68356e-07	1.738e-07	1.60085e-07	1.59511e-07	1.85354e-07	1.86023e-07	1.56747e-07	1.12378e-07	2.11548e-07
1266.65	8.25	2.10562e-07	2.01167e-07	2.10429e-07	2.00149e-07	1.71962e-07	1.9131e-07	2.04828e-07	2.07853e-07	2.00868e-07	1.7039e-07	1.77769e-07	1.86145e-07	1.94644e-07	1.74712e-07	1.61884e-07	1.6629e-07	1.48441e-07
1275.06	8.25	0	2.40829e-09	6.09217e-09	0	0	7.6298e-10	-4.80046e-09	0	-3.29018e-09	4.12726e-09	1.30729e-08	1.34978e-08	2.66727e-09	-4.28615e-09	0	1.69804e-08	0
1283.48	8.25	7.60961e-08	4.71573e-08	4.67485e-08	5.29053e-08	5.87398e-08	5.51156e-08	4.67849e-08	4.23083e-08	5.4632e-08	4.3836e-08	5.2827e-08	3.74763e-08	4.93762e-08	5.60515e-08	3.30312e-08	5.11461e-08	5.97278e-08
1291.9	8.25	2.30812e-06	1.88265e-06	1.8835e-06	1.85643e-06	1.84134e-06	1.85448e-06	1.87726e-06	1.84141e-06	1.91431e-06	1.85418e-06	1.93706e-06	1.97294e-06	1.94389e-06	1.84207e-06	1.3306e-06	1.50171e-07	-1.33103e-06
1300.31	8.25	3.0342e-07	2.61936e-07	2.70824e-07	2.65603e-07	2.68486e-07	2.50499e-07	2.79912e-07	2.64499e-07	2.47061e-07	2.37855e-07	2.55631e-07	2.12938e-07	2.42327e-07	2.36905e-07	1.9502e-07	1.8672e-07	2.53814e-07
1308.73	8.25	1.46861e-07	1.45011e-07	1.33963e-07	1.24362e-07	1.29387e-07	1.27873e-07	1.34656e-07	1.29324e-07	1.22812e-07	1.42551e-07	1.43565e-07	1.41906e-07	1.48311e-07	1.09204e-07	1.29096e-07	1.11203e-07	8.54315e-08
1317.15	8.25	8.81824e-06	8.14152e-06	8.12455e-06	8.08276e-06	8.07971e-06	8.03147e-06	8.00738e-06	7.96531e-06	7.90379e-06	7.86513e-06	7.79832e-06	7.70707e-06	7.48771e-06	7.26242e-06	7.06056e-06	7.55351e-06	8.91446e-06
1325.56	8.25	7.09916e-07	5.44567e-07	5.53078e-07	5.41397e-07	5.3676e-07	5.31256e-07	5.27691e-07	5.13196e-07	4.99239e-07	4.66938e-07	4.87098e-07	4.00855e-07	3.35828e-07	2.70843e-07	3.04274e-07	2.47011e-07	-1.05167e-07
1333.98	8.25	1.10327e-06	1.0544e-06	1.08432e-06	1.07388e-06	1.09504e-06	1.0573e-06	1.05173e-06	9.92014e-07	1.04742e-06	9.72217e-07	9.79081e-07	9.86438e-07	9.70199e-07	9.38574e-07	9.9623e-07	1.02813e-06	9.40614e-07
1342.4	8.25	3.15463e-06	2.99379e-06	3.01583e-06	3.01847e-06	2.99994e-06	3.01433e-06	3.00605e-06	3.0165e-06	2.94745e-06	2.96214e-06	2.9265e-06	2.88668e-06	2.93523e-06	2.8693e-06	2.88793e-06	2.918e-06	2.99515e-06
1350.81	8.25	3.6712e-07	3.12405e-07	2.49788e-07	2.89495e-07	2.31061e-07	2.43211e-07	3.17221e-07	2.36112e-07	2.78141e-07	2.46967e-07	2.33935e-07	2.84518e-07	3.36703e-07	2.06166e-07	3.02719e-07	2.34378e-07	2.88552e-07
1359.23	8.25	6.38446e-08	8.96706e-08	9.0118e-08	9.14325e-08	8.04214e-08	9.89969e-08	9.30248e-08	9.18604e-08	8.43976e-08	9.53646e-08	9.87552e-08	8.89854e-08	9.66355e-08	8.76764e-08	9.76234e-08	1.05246e-07	1.06381e-07
1367.65	8.25	5.46633e-07	6.14425e-07	6.22754e-07	6.23753e-07	6.22958e-07	6.18513e-07	6.32135e-07	6.24261e-07	6.21743e-07	6.22137e-07	6.13895e-07	6.31521e-07	6.20065e-07	6.34496e-07	6.3877e-07	6.53982e-07	6.86573e-07
1376.06	8.25	3.82246e-07	3.92343e-07	4.0544e-07	3.9437e-07	3.62694e-07	4.5064e-07	4.30487e-07	3.84686e-07	4.95543e-07	3.69035e-07	4.22979e-07	4.00548e-07	4.18131e-07	4.11041e-07	4.34539e-07	4.7392e-07	5.05793e-07
1384.48	8.25	6.78714e-08	4.00274e-08	4.06324e-08	4.41267e-08	4.6148e-08	3.6721e-08	3.79874e-08	3.19114e-08	3.75205e-08	3.99424e-08	4.63455e-08	3.58755e-08	6.02437e-08	4.76818e-08	5.2961e-08	4.91509e-08	4.7861e-08
1392.9	8.25	-3.76129e-09	3.30192e-08	-4.52532e-09	-9.03916e-09	7.05463e-09	-6.71883e-09	-4.11463e-09	-4.87287e-09	2.0834e-09	-5.3138e-10	-2.74952e-10	-7.22474e-09	-1.0428e-08	-3.56023e-09	-7.34969e-10	2.49329e-10	-1.39262e-08
1401.31	8.25	-5.76731e-11	5.48231e-09	2.02886e-09	2.77493e-09	2.35269e-09	2.87393e-09	3.44683e-09	6.58255e-09	8.40623e-09	2.69325e-09	3.95575e-10	7.16081e-09	-2.06054e-09	3.54019e-09	1.16866e-10	6.72236e-10	-6.2617e-09
1409.73	8.25	1.06357e-09	0	1.69176e-09	1.82137e-09	2.94065e-09	3.39771e-08	6.46209e-09	-4.40932e-09	3.81021e-08	-4.55224e-09	-5.04887e-09	-6.25351e-09	-2.0268e-09	4.25006e-09	-3.20723e-09	2.86631e-09	-3.58875e-10
1418.15	8.25	-2.57969e-10	1.15687e-08	-2.97425e-09	-1.13382e-09	-1.26657e-09	-1.0762e-09	-2.2039e-08	2.10482e-08	6.5282e-09	-1.24733e-09	-3.43177e-09	-2.09995e-09	-3.94939e-10	-1.62096e-09	-1.8145e-08	-6.21595e-11	-4.24936e-09
1426.56	8.25	2.25334e-06	1.32781e-06	1.25477e-06	1.22473e-06	1.21591e-06	1.19164e-06	1.20262e-06	1.1563e-06	1.10609e-06	1.09337e-06	1.05369e-06	1.01682e-06	9.01972e-07	8.63284e-07	7.61036e-07	6.92791e-07	6.3092e-07
1434.98	8.25	0.000336568	0.000294089	0.000292775	0.000291354	0.000290053	0.000288644	0.000287304	0.00028444	0.000281766	0.000278872	0.00027311	0.000267204	0.000260707	0.000250425	0.000231776	0.00021141	0.00019133
1443.4	8.25	0.000139341	0.00011364	0.000113194	0.000112593	0.000112065	0.000111566	0.000111016	0.000110005	0.000108932	0.000107924	0.000106072	0.000104196	0.000101851	9.84329e-05	9.2706e-05	8.64443e-05	8.11235e-05
1451.81	8.25	1.18538e-05	1.03921e-05	1.03901e-05	1.03231e-05	1.02812e-05	1.02648e-05	1.01852e-05	1.01779e-05	1.01655e-05	1.0127e-05	1.0085e-05	1.0106e-05	1.00891e-05	1.00324e-05	1.01133e-05	1.0403e-05	1.08183e-05
1460.23	8.25	5.11053e-07	3.77863e-07	3.99518e-07	3.68907e-07	3.87902e-07	3.89228e-07	3.68298e-07	3.81848e-07	3.72e-07	3.63606e-07	3.67098e-07	3.86511e-07	3.307e-07	3.62633e-07	3.4307e-07	2.96684e-07	3.53034e-07
1468.65	8.25	4.07105e-06	3.85341e-06	3.82175e-06	3.85818e-06	3.82956e-06	3.84019e-06	3.84501e-06	3.87597e-06	3.85214e-06	3.82913e-06	3.89609e-06	3.85584e-06	3.84321e-06	3.8838e-06	3.88e-06	3.92798e-06	3.98376e-06
1477.06	8.25	1.00451e-05	1.01976e-05	1.01879e-05	1.01612e-05	1.02106e-05	1.01826e-05	1.01692e-05	1.0193e-05	1.01777e-05	1.01851e-05	1.02382e-05	1.02719e-05	1.03917e-05	1.06526e-05	1.12362e-05	1.17698e-05	1.25246e-05
1485.48	8.25	1.86103e-06	1.84098e-06	1.83721e-06	1.82513e-06	1.84319e-06	1.82323e-06	1.85359e-06	1.83539e-06	1.87096e-06	1.86395e-06	1.8534e-06	1.87178e-06	1.91491e-06	1.84003e-06	2.00639e-06	1.96743e-06	2.12992e-06
1493.9	8.25	3.17615e-06	2.68491e-06	2.66791e-06	2.61226e-06	2.60085e-06	2.51506e-06	2.48667e-06	2.44431e-06	2.27113e-06	2.17338e-06	2.04631e-06	1.92294e-06	1.77279e-06	1.52136e-06	1.52213e-06	8.15935e-07	4.18396e-07
1502.31	8.25	6.1584e-07	6.22959e-07	5.97776e-07	6.31819e-07	5.83767e-07	5.97152e-07	5.86813e-07	6.15417e-07	5.86327e-07	6.00196e-07	6.19872e-07	5.82828e-07	5.78953e-07	5.93741e-07	6.42778e-07	6.68029e-07	6.88871e-07
1510.73	8.25	1.12277e-08	1.20031e-08	1.05238e-08	1.04581e-08	5.83997e-08	2.8965e-08	1.12458e-08	1.06075e-08	1.14648e-08	3.32834e-08	4.4139e-09	0	8.86216e-09	5.36639e-09	2.01511e-08	-9.76865e-09	1.89911e-08
1519.15	8.25	1.02734e-07	9.83168e-08	1.13682e-07	7.20894e-08	1.00799e-07	1.00713e-07	9.61403e-08	8.33267e-08	7.38748e-08	6.61692e-08	9.93862e-08	3.94369e-08	1.35037e-07	6.52959e-08	8.77038e-08	8.66764e-08	6.61795e-08
1527.56	8.25	6.4483e-06	5.52397e-06	5.44123e-06	5.40254e-06	5.36611e-06	5.27048e-06	5.12892e-06	5.03339e-06	4.75339e-06	4.5141e-06	4.41154e-06	4.32154e-06	3.99464e-06	4.10094e-06	3.80551e-06	9.38658e-07	6.58877e-07
1535.98	8.25	3.85335e-05	3.55417e-05	3.53569e-05	3.51916e-05	3.50036e-05	3.48515e-05	3.46826e-05	3.44498e-05	3.41632e-05	3.40207e-05	3.38101e-05	3.39099e-05	3.28188e-05	3.13618e-05	3.03621e-05	2.5385e-05	2.67771e-05
1544.4	8.25	1.71456e-05	1.55396e-05	1.5485e-05	1.53993e-05	1.5304e-05	1.52306e-05	1.51842e-05	1.50581e-05	1.49479e-05	1.48088e-05	1.45976e-05	1.44736e-05	1.40204e-05	1.34479e-05	1.3644e-05	1.1034e-05	1.10214e-05
1552.81	8.25	2.79069e-07	2.58569e-07	2.55486e-07	2.15234e-07	2.70449e-07	2.28088e-07	2.3622e-07	2.43792e-07	2.47947e-07	2.39107e-07	2.31802e-07	2.7153e-07	2.02137e-07	1.78832e-07	2.72935e-07	8.36113e-08	1.81635e-07
1561.23	8.25	4.2016e-07	3.64515e-07	3.44577e-07	3.56611e-07	3.34528e-07	3.19715e-07	3.22656e-07	3.0647e-07	3.28222e-07	3.55193e-07	3.10894e-07	2.90972e-07	2.81484e-07	3.47029e-07	2.54671e-07	3.66407e-07	2.55124e-07
1569.65	8.25	0.000156315	0.000162335	0.000161379	0.000160588	0.00015976	0.000158736	0.000158035	0.000156325	0.000154978	0.000153667	0.000151565	0.000149545	0.000145189	0.000138905	0.000130179	0.000114711	0.000109907
1578.06	8.25	0.000173627	0.000185177	0.000184169	0.000183224	0.000182302	0.000181364	0.000180515	0.000178731	0.000177124	0.000175816	0.000173282	0.000171524	0.000167318	0.000161511	0.000153754	0.000134876	0.000125815
1586.48	8.25	2.28972e-05	2.11131e-05	2.0936e-05	2.07899e-05	2.06072e-05	2.05503e-05	2.03995e-05	2.01892e-05	2.00292e-05	1.98001e-05	1.94306e-05	1.90507e-05	1.82199e-05	1.72742e-05	1.6679e-05	1.29918e-05	1.32093e-05
1594.9	8.25	1.02486e-05	8.80035e-06	8.77567e-06	8.8102e-06	8.73347e-06	8.72892e-06	8.63712e-06	8.67759e-06	8.6798e-06	8.65627e-06	8.76885e-06	9.05328e-06	8.69247e-06	8.13995e-06	6.99226e-06	4.35933e-06	4.66609e-06
1603.31	8.25	0.000203028	0.000223279	0.000222149	0.00022099	0.000219926	0.000218758	0.000217842	0.000215733	0.000213889	0.000212283	0.000209039	0.000206555	0.000201023	0.000192243	0.000180542	0.000155449	0.000143604
1611.73	8.25	0.000142356	0.000152595	0.000151755	0.000150852	0.000149986	0.000149434	0.000148434	0.000147159	0.000145671	0.000144775	0.000142342	0.000140494	0.000136525	0.000130479	0.000123481	0.000105108	9.97237e-05
1620.15	8.25	1.47522e-05	1.21868e-05	1.19668e-05	1.19968e-05	1.18587e-05	1.17119e-05	1.1536e-05	1.13906e-05	1.10708e-05	1.10081e-05	1.0507e-05	1.01422e-05	9.57932e-06	9.11618e-06	9.24031e-06	8.28505e-06	8.79342e-06
1628.56	8.25	4.02644e-06	3.63113e-06	3.65207e-06	3.46899e-06	3.30495e-06	3.307e-06	3.04669e-06	3.06202e-06	2.63882e-06	2.55764e-06	2.62488e-06	2.5993e-06	2.62109e-06	2.25466e-06	1.33089e-06	-9.81972e-07	-1.52518e-06
1636.98	8.25	1.15547e-05	1.04535e-05	1.04978e-05	1.03402e-05	1.02553e-05	1.0222e-05	1.00936e-05	9.95626e-06	9.94361e-06	9.9457e-06	9.80961e-06	9.84868e-06	9.49776e-06	8.90653e-06	7.9909e-06	5.34146e-06	6.03938e-06
1645.4	8.25	3.33145e-05	3.11097e-05	3.09754e-05	3.08835e-05	3.07502e-05	3.0615e-05	3.04898e-05	3.02988e-05	3.01474e-05	3.01007e-05	3.00665e-05	3.03914e-05	2.93089e-05	2.79646e-05	2.70324e-05	2.30479e-05	2.65488e-05
1653.81	8.25	1.51434e-05	1.37165e-05	1.3618e-05	1.35335e-05	1.35037e-05	1.33611e-05	1.34327e-05	1.33016e-05	1.32402e-05	1.31411e-05	1.31272e-05	1.32865e-05	1.28701e-05	1.23286e-05	1.28109e-05	1.12298e-05	1.37256e-05
1662.23	8.25	2.61626e-06	2.36379e-06	2.26073e-06	2.21693e-06	2.10693e-06	2.0824e-06	2.14289e-06	1.93948e-06	1.95986e-06	1.96286e-06	2.02373e-06	2.06177e-06	1.86804e-06	1.45813e-06	9.42482e-07	-1.29459e-07	-2.46437e-07
1670.65	8.25	1.12564e-06	9.59254e-07	9.76292e-07	9.57428e-07	9.43658e-07	9.6401e-07	9.35431e-07	9.4229e-07	9.20168e-07	9.0555e-07	9.24983e-07	9.59914e-07	8.78484e-07	8.08632e-07	9.00952e-07	6.52208e-07	8.16802e-07
1679.06	8.25	2.8721e-07	2.38488e-07	2.57638e-07	2.45009e-07	2.6996e-07	2.27545e-07	2.04054e-07	2.22816e-07	2.53951e-07	2.21791e-07	1.73931e-07	1.79723e-07	2.07289e-07	2.3338e-07	1.55757e-07	1.28744e-07	1.95182e-07
1687.48	8.25	1.06093e-07	9.48195e-08	7.28385e-08	9.26337e-08	1.04748e-07	9.4918e-08	8.77176e-08	5.28263e-08	6.76886e-08	1.25827e-07	8.65274e-08	2.7658e-08	6.62981e-08	1.02586e-07	1.15071e-07	6.99988e-08	8.55363e-08
1695.9	8.25	2.70622e-08	1.88203e-08	2.03126e-08	1.82311e-08	8.73558e-09	2.50281e-08	3.41227e-08	2.64214e-08	1.40941e-08	5.34958e-08	2.38261e-08	0	3.90182e-08	-1.53094e-08	1.50772e-08	2.18308e-09	2.6308e-09
1704.31	8.25	8.03415e-09	3.66745e-09	1.44068e-08	9.05858e-09	3.34774e-08	1.36322e-08	7.50245e-09	1.37196e-08	0	0	3.53949e-08	1.84451e-08	1.87311e-08	0	1.66716e-08	3.34202e-09	-2.11011e-11
1712.73	8.25	1.26372e-08	0	2.60115e-08	6.56522e-09	2.89833e-08	3.26249e-08	0	-9.69089e-09	5.64578e-08	4.54302e-08	0	5.09671e-08	-1.08879e-08	2.04343e-08	1.10986e-08	1.61105e-08	2.59664e-08
1721.15	8.25	2.00428e-08	1.02329e-08	1.14845e-08	0	4.33239e-08	2.1754e-08	5.44626e-09	9.74999e-09	3.66931e-08	-1.63231e-08	-4.38177e-09	0	1.53701e-08	0	3.43104e-09	3.16499e-09	2.18661e-08
1729.56	8.25	0	0	7.0132e-09	-3.97012e-09	-2.2225e-09	0	0	0	0	1.54162e-09	0	-3.04733e-08	-9.58676e-09	0	1.61639e-08	2.09871e-08	-3.16917e-09
1737.98	8.25	0	0	0	-2.00895e-09	0	0	0	0	0	0	-3.3852e-08	0	0	0	1.13455e-08	7.87016e-09	9.93395e-10
1746.4	8.25	0	0	-2.47786e-09	0	0	0	0	0	-1.65277e-08	0	0	0	0	0	0	-8.77222e-09	1.16112e-24
1754.81	8.25	2.70192e-07	2.41624e-07	2.48834e-07	2.43036e-07	2.16942e-07	2.12675e-07	2.46891e-07	2.55832e-07	2.55474e-07	1.94801e-07	2.36029e-07	2.16218e-07	1.46373e-07	2.34202e-07	2.60515e-07	2.37029e-07	2.89897e-07
1763.23	8.25	2.19985e-07	1.59239e-07	1.58571e-07	1.69317e-07	1.69547e-07	1.89985e-07	1.3434e-07	1.56346e-07	2.72007e-07	1.014e-07	1.47697e-07	2.61869e-07	1.19145e-07	3.58581e-07	1.58195e-07	1.26568e-07	1.57309e-07
1771.65	8.25	1.23272e-08	5.12516e-08	3.75607e-08	2.88415e-08	6.75047e-08	4.07907e-08	1.10472e-08	0	6.16267e-08	6.7473e-08	1.44828e-08	0	5.53727e-08	6.18139e-08	3.38723e-08	3.40032e-08	5.12403e-08
1780.06	8.25	0	0	2.93606e-08	3.79315e-08	1.34994e-08	3.3755e-08	0	1.61894e-08	2.80019e-09	-7.00836e-09	0	1.83433e-08	1.47598e-08	-5.58325e-10	3.51155e-09	-1.86634e-09	1.64697e-08
1788.48	8.25	2.86259e-07	2.57258e-07	2.85787e-07	2.0906e-07	2.60565e-07	2.43349e-07	2.68128e-07	2.95796e-07	2.55365e-07	2.66634e-07	2.7463e-07	1.66676e-07	1.26872e-07	3.09757e-07	2.40308e-07	2.78015e-07	3.22245e-07
1796.9	8.25	1.01068e-07	1.47959e-07	7.65789e-08	1.49391e-07	1.33637e-07	1.6975e-07	1.45397e-07	1.64555e-07	1.62598e-07	7.92451e-08	8.17768e-08	1.40197e-07	9.64297e-08	1.51565e-07	1.68773e-07	2.15799e-07	1.99866e-07
1805.31	8.25	9.18255e-09	1.3265e-08	1.65541e-08	1.4068e-08	3.33918e-08	3.42095e-08	1.47377e-07	4.44614e-09	8.76213e-09	1.24591e-07	4.85595e-09	4.28991e-08	2.14637e-08	1.58931e-08	3.5552e-09	3.55657e-08	0
1813.73	8.25	7.28589e-09	5.42747e-08	2.26526e-09	9.50054e-09	1.0087e-08	2.23401e-08	-5.10908e-09	-1.10293e-09	3.20694e-10	1.15647e-08	4.95427e-09	1.19722e-08	5.64916e-09	1.57237e-08	1.62422e-08	2.60436e-08	5.27062e-08
1822.15	8.25	-6.64579e-09	-4.25369e-08	-2.21593e-08	-4.44069e-08	-4.00721e-08	-4.39831e-08	-2.72499e-08	-3.72411e-08	-3.31582e-08	-5.35284e-08	-4.46952e-08	-4.10026e-08	-6.34101e-08	-2.81895e-08	-5.56814e-08	-1.03743e-07	-1.17686e-07
1830.56	8.25	6.90666e-08	1.27492e-07	1.33043e-07	1.3325e-07	1.28089e-07	1.33708e-07	1.33959e-07	1.10095e-07	1.18774e-07	1.30341e-07	1.06873e-07	1.39529e-07	1.42128e-07	1.47266e-07	1.24592e-07	1.57755e-07	1.38565e-07
1838.98	8.25	-1.7839e-08	-7.5575e-08	-7.68915e-08	-1.84817e-08	-1.84831e-08	-1.84847e-08	-1.84864e-08	-1.84908e-08	-1.84964e-08	-2.17932e-08	-1.9838e-08	-1.85536e-08	-1.52935e-08	-1.53867e-08	-1.56939e-08	-1.6334e-08	-1.70081e-08
1847.4	8.25	-2.53342e-08	-4.92441e-08	-4.93182e-08	-4.93968e-08	-4.94804e-08	-5.24451e-08	-5.25442e-08	-5.15192e-08	-5.17541e-08	-5.20159e-08	-5.26312e-08	-5.33883e-08	-1.49906e-08	-5.43429e-08	-5.8673e-08	-6.52735e-08	-7.14784e-08
1855.82	8.25	-6.76344e-08	-8.97069e-08	-9.83026e-08	-9.04733e-08	-9.05321e-08	-9.05956e-08	-9.06649e-08	-9.0819e-08	-9.09978e-08	-9.12052e-08	-9.17217e-08	-9.24031e-08	-9.33146e-08	-9.51945e-08	-1.00248e-07	-1.0879e-07	-1.17101e-07
1864.23	8.25	1.40121e-07	1.31649e-07	1.18243e-07	1.74785e-07	1.17709e-07	1.31079e-07	1.22028e-07	1.29529e-07	1.20964e-07	1.32325e-07	1.37999e-07	1.48125e-07	1.30887e-07	1.36581e-07	1.87575e-07	1.75788e-07	1.94201e-07
1872.65	8.25	1.95329e-05	1.95095e-05	1.94252e-05	1.93971e-05	1.94272e-05	1.95295e-05	1.95726e-05	1.94327e-05	1.94922e-05	1.9468e-05	1.95147e-05	1.94818e-05	1.95474e-05	1.95904e-05	1.95852e-05	1.98132e-05	2.01144e-05
1881.07	8.25	6.10618e-05	4.5555e-05	4.5476e-05	4.53532e-05	4.53108e-05	4.51719e-05	4.51268e-05	4.49133e-05	4.47262e-05	4.45147e-05	4.40183e-05	4.35682e-05	4.30716e-05	4.21986e-05	4.05002e-05	3.85883e-05	3.71201e-05
1889.48	8.25	1.62186e-05	1.59436e-05	1.59572e-05	1.59606e-05	1.59464e-05	1.59411e-05	1.59598e-05	1.5966e-05	1.59653e-05	1.59462e-05	1.59858e-05	1.60516e-05	1.61495e-05	1.63072e-05	1.68652e-05	1.79313e-05	1.9121e-05
1897.9	8.25	3.99269e-06	5.56103e-06	5.57463e-06	5.56631e-06	5.63427e-06	5.61875e-06	5.66196e-06	5.59861e-06	5.6297e-06	5.70449e-06	5.79474e-06	5.85666e-06	6.01369e-06	6.20194e-06	6.73973e-06	7.40501e-06	8.19025e-06
1906.32	8.25	2.84527e-06	4.88634e-06	4.81687e-06	4.87368e-06	4.91086e-06	4.91436e-06	4.89158e-06	4.94359e-06	4.9477e-06	4.912e-06	5.00841e-06	5.16409e-06	5.17582e-06	5.37574e-06	5.78729e-06	6.52791e-06	7.01681e-06
1914.73	8.25	5.5167e-07	8.92614e-07	8.78238e-07	8.71898e-07	9.21667e-07	8.54981e-07	8.80513e-07	8.5275e-07	8.81965e-07	8.21207e-07	9.2639e-07	8.4015e-07	9.29457e-07	9.13803e-07	1.08851e-06	1.03409e-06	1.15312e-06
1923.15	8.25	5.86828e-07	6.6994e-07	6.37577e-07	6.47964e-07	6.12587e-07	6.51873e-07	6.35818e-07	6.61366e-07	6.48253e-07	6.45527e-07	6.74182e-07	6.27673e-07	6.66464e-07	6.88854e-07	7.07419e-07	7.6354e-07	9.32452e-07
1931.57	8.25	2.58727e-06	2.01075e-06	2.00595e-06	2.02541e-06	1.94813e-06	2.06028e-06	1.88759e-06	1.99021e-06	1.85218e-06	1.94851e-06	1.91788e-06	1.92767e-06	1.95466e-06	1.92034e-06	1.91596e-06	2.17291e-06	2.25492e-06
1939.98	8.25	0.000130918	8.28526e-05	8.21095e-05	8.14135e-05	8.05947e-05	7.99175e-05	7.91759e-05	7.76987e-05	7.62554e-05	7.48709e-05	7.2102e-05	6.93582e-05	6.65759e-05	6.26592e-05	5.66587e-05	5.17154e-05	4.80734e-05
1948.4	8.25	0.000727728	0.000595462	0.000591693	0.000588097	0.000584424	0.000580782	0.000577039	0.000569585	0.000562121	0.000554523	0.000539199	0.000523617	0.000507248	0.000481102	0.000431717	0.000380121	0.000327563
1956.82	8.25	0.00154812	0.00122292	0.00121692	0.00121088	0.00120482	0.00119873	0.00119249	0.00117985	0.00116694	0.00115381	0.00112681	0.00109862	0.00106819	0.00101861	0.000921196	0.000815069	0.00071582
1965.23	8.25	0.00115231	0.000979953	0.000975086	0.000970196	0.000964987	0.000960204	0.000955128	0.000944847	0.000934926	0.000924795	0.000904509	0.000883701	0.000861716	0.000827094	0.000761459	0.000693297	0.000622603
1973.65	8.25	0.000379286	0.000361984	0.000359977	0.000358126	0.0003562	0.000354327	0.000352328	0.000348554	0.00034469	0.000340898	0.000333015	0.000325152	0.000316067	0.000301372	0.000272256	0.000239777	0.000205546
1982.07	8.25	6.33529e-05	5.62577e-05	5.58499e-05	5.55392e-05	5.54001e-05	5.48928e-05	5.48055e-05	5.39981e-05	5.3706e-05	5.338e-05	5.26399e-05	5.2185e-05	5.11896e-05	4.92543e-05	4.74569e-05	4.00972e-05	4.0615e-05
1990.48	8.25	4.85493e-05	4.5036e-05	4.50253e-05	4.46799e-05	4.46712e-05	4.46596e-05	4.46595e-05	4.45582e-05	4.46469e-05	4.48474e-05	4.53753e-05	4.65651e-05	4.56661e-05	4.4729e-05	4.50953e-05	4.29233e-05	4.96987e-05
1998.9	8.25	0.00108691	0.000966653	0.000963054	0.000959635	0.000955972	0.000952523	0.000948949	0.000941653	0.000934229	0.000926615	0.000911074	0.000894854	0.000877752	0.000849542	0.00078959	0.000725461	0.000656327
2007.32	8.25	0.00284717	0.00232149	0.00230928	0.00229691	0.00228441	0.0022717	0.00225885	0.00223274	0.00220586	0.00217826	0.00212052	0.0020588	0.00199918	0.00190006	0.00169673	0.00149076	0.00128647
2015.73	8.25	0.00276874	0.00215226	0.00213931	0.00212634	0.00211324	0.00210014	0.00208684	0.00206015	0.00203303	0.00200543	0.0019488	0.00188971	0.00183172	0.00173772	0.00155151	0.00136864	0.00118392
2024.15	8.25	0.000840221	0.000757257	0.00075316	0.000749143	0.000745052	0.000741042	0.000736969	0.000728752	0.000720684	0.000712414	0.000695572	0.000678119	0.000661343	0.00063409	0.000579799	0.00052368	0.000461009
2032.57	8.25	0.000306799	0.000280111	0.000278126	0.000276415	0.000274757	0.000273128	0.000271533	0.000268452	0.000265522	0.000262906	0.00025846	0.000254871	0.000246886	0.000236416	0.000221347	0.000188096	0.000187676
2040.98	8.25	0.000303937	0.000300953	0.000299852	0.000298217	0.000297117	0.000295775	0.000294337	0.000292065	0.00028992	0.00028798	0.000284882	0.000283966	0.000278396	0.000269744	0.000256465	0.000221065	0.000212712
2049.4	8.25	0.000732578	0.000719058	0.000715573	0.000711793	0.000708297	0.000704906	0.000701302	0.000693739	0.000685798	0.000677488	0.000661105	0.000643125	0.000627662	0.000601844	0.000546828	0.000491065	0.000429791
2057.82	8.25	0.000875194	0.000813039	0.000809032	0.000805262	0.00080138	0.000797814	0.000793913	0.000785985	0.000778563	0.000770461	0.000754488	0.000737587	0.000721501	0.000695217	0.000641758	0.000588621	0.000531921
2066.23	8.25	0.000916756	0.000829006	0.000824782	0.000820481	0.00081611	0.000811705	0.000807423	0.000798797	0.000789943	0.000780995	0.000762385	0.000743152	0.000726196	0.000698823	0.000644866	0.000592678	0.000538114
2074.65	8.25	0.000593267	0.000581768	0.000578768	0.000575641	0.000572675	0.000569905	0.000566798	0.000560809	0.000554846	0.000548751	0.000536658	0.000524393	0.000511518	0.000491345	0.000449926	0.000397504	0.000346745
2083.07	8.25	0.0003126	0.000292174	0.000290284	0.000288553	0.000286912	0.00028518	0.000283519	0.000280605	0.000277922	0.000275195	0.000271127	0.000268511	0.000260311	0.00024823	0.000232469	0.000194819	0.000191866
2091.48	8.25	0.000188528	0.000172122	0.000170961	0.000169787	0.000168501	0.000167376	0.000166261	0.00016408	0.000162484	0.000160589	0.000157885	0.000156425	0.000150649	0.000143129	0.000136241	0.000105607	0.000112366
2099.9	8.25	6.58062e-05	6.0305e-05	5.98676e-05	5.96147e-05	5.92852e-05	5.8854e-05	5.87186e-05	5.81034e-05	5.82548e-05	5.83841e-05	5.90589e-05	5.96649e-05	5.77002e-05	5.58762e-05	5.33669e-05	3.54559e-05	5.17531e-05
2108.32	8.25	2.65861e-05	2.38337e-05	2.37223e-05	2.36456e-05	2.36683e-05	2.35244e-05	2.33652e-05	2.33175e-05	2.33658e-05	2.33271e-05	2.38048e-05	2.44642e-05	2.43109e-05	2.36066e-05	1.7753e-05	1.05858e-05	2.70481e-05
2116.73	8.25	1.80576e-05	1.49799e-05	1.49285e-05	1.43534e-05	1.43356e-05	1.36532e-05	1.34601e-05	1.33797e-05	1.28834e-05	1.20706e-05	1.13822e-05	1.1196e-05	9.68955e-06	7.6303e-06	4.55464e-06	-4.82657e-06	-9.91739e-06
2125.15	8.25	3.27059e-06	2.85314e-06	2.80347e-06	2.81476e-06	2.81152e-06	2.65437e-06	2.65513e-06	2.4552e-06	2.344e-06	2.38609e-06	2.34069e-06	2.25251e-06	2.04519e-06	1.77663e-06	2.00071e-06	5.87811e-07	1.54216e-06
2133.57	8.25	1.89882e-06	1.55429e-06	1.54492e-06	1.44191e-06	1.42675e-06	1.29582e-06	1.34718e-06	1.23398e-06	1.22688e-06	1.37879e-06	1.2046e-06	1.14345e-06	9.87181e-07	7.53637e-07	4.78488e-07	-1.36468e-06	-1.04952e-06
2141.98	8.25	2.3975e-06	2.10175e-06	2.03299e-06	1.97748e-06	1.92118e-06	1.78404e-06	1.83675e-06	1.61405e-06	1.29374e-06	1.11882e-06	5.17431e-07	4.54445e-07	1.26082e-07	4.88871e-08	1.34044e-07	-4.51847e-06	-7.33067e-06
2150.4	8.25	1.98492e-05	1.74927e-05	1.73749e-05	1.70479e-05	1.68855e-05	1.66909e-05	1.65463e-05	1.61177e-05	1.57435e-05	1.52794e-05	1.47536e-05	1.41342e-05	1.46292e-05	1.62105e-05	2.29166e-05	2.08545e-05	3.03187e-05
2158.82	8.25	1.17409e-05	1.03721e-05	9.83091e-06	9.7578e-06	9.79949e-06	9.71758e-06	8.99765e-06	8.76114e-06	8.51469e-06	8.32374e-06	7.73157e-06	7.36302e-06	6.57172e-06	5.38217e-06	3.51559e-06	2.96386e-06	1.08318e-05
2167.23	8.25	9.33714e-06	8.7595e-06	8.67079e-06	8.61751e-06	8.33608e-06	8.18132e-06	8.22836e-06	7.92613e-06	7.81026e-06	7.59912e-06	7.4815e-06	7.57314e-06	7.00274e-06	6.08602e-06	4.40548e-06	8.74355e-07	4.34042e-06
2175.65	8.25	2.65053e-06	1.86579e-06	1.75871e-06	2.0305e-06	1.92301e-06	2.03445e-06	1.93618e-06	2.02326e-06	1.92224e-06	1.80489e-06	1.58991e-06	1.41808e-06	1.00298e-06	-3.01038e-07	-2.10233e-06	-4.97884e-06	-8.0842e-06
2184.07	8.25	6.46299e-07	5.91043e-07	4.14483e-07	5.96872e-07	8.17694e-07	6.16844e-07	7.34996e-07	6.76682e-07	6.00483e-07	3.91137e-07	5.97798e-07	5.77417e-07	5.57679e-07	5.37694e-07	5.52829e-07	3.9516e-07	4.91451e-07
2192.48	8.25	7.54459e-07	8.20563e-07	7.57202e-07	7.24825e-07	5.82316e-07	6.68389e-07	7.80406e-07	7.33014e-07	7.6063e-07	6.1521e-07	6.56642e-07	7.04722e-07	6.57976e-07	6.43764e-07	7.54144e-07	4.28949e-07	8.39919e-07
2200.9	8.25	1.67327e-07	6.70155e-08	1.24709e-07	1.45433e-07	2.91516e-07	5.21363e-08	5.32036e-08	3.55716e-07	2.70574e-07	1.30664e-07	1.13353e-07	1.03734e-07	6.11801e-08	6.72152e-08	1.57072e-07	4.79673e-08	9.44606e-08
2209.32	8.25	3.13586e-07	3.30704e-07	2.35299e-07	1.72713e-07	1.86216e-07	2.38739e-07	3.19687e-07	4.54209e-07	2.08105e-07	1.949e-07	2.28452e-07	2.24981e-07	2.20113e-07	2.01846e-07	2.87975e-07	1.57411e-07	3.94174e-07
2217.73	8.25	1.98264e-07	1.88653e-07	1.18531e-07	1.59707e-07	2.38057e-07	1.93535e-07	2.07875e-07	2.55477e-07	1.36752e-07	2.95557e-07	1.36752e-07	1.64365e-07	1.24561e-07	1.38913e-07	1.42123e-07	1.24438e-07	2.36319e-07
2226.15	8.25	2.0793e-07	2.39185e-07	3.03655e-07	1.72343e-07	1.84344e-07	7.16086e-08	2.98186e-07	1.20869e-07	1.29488e-07	2.8471e-07	1.73474e-07	1.74118e-07	1.8114e-07	1.08681e-07	2.01168e-07	7.08819e-08	1.38655e-07
2234.57	8.25	2.7429e-08	1.07548e-07	1.60937e-07	1.18893e-07	5.36476e-08	4.09298e-08	0	5.79958e-08	0	3.67735e-09	6.19397e-08	4.51558e-08	3.34595e-08	2.81707e-08	2.57746e-08	4.13292e-08	-1.02249e-08
2242.98	8.25	1.00231e-07	0	1.39483e-08	0	7.94747e-08	6.94158e-08	3.34919e-09	9.4214e-08	1.26299e-08	7.37752e-08	1.47249e-08	3.20738e-08	4.07497e-08	4.21507e-08	3.06385e-08	-2.67882e-08	8.98301e-08
2251.4	8.25	1.92472e-07	8.71455e-08	1.15109e-07	2.15487e-07	1.64606e-07	1.74914e-07	9.42233e-08	1.91092e-08	2.59771e-07	1.9715e-07	1.47591e-07	1.57644e-07	1.45645e-07	1.38936e-07	2.1916e-07	8.08935e-08	8.6611e-08
2259.82	8.25	1.11293e-07	1.98501e-07	0	1.68938e-07	1.12086e-07	1.20976e-07	9.60031e-08	1.76032e-07	7.24908e-08	1.08403e-07	1.24887e-07	9.45842e-08	1.50399e-07	1.09843e-07	8.39466e-08	9.17704e-08	0
2268.23	8.25	6.85895e-09	3.95626e-08	5.31352e-08	0	6.09136e-08	7.52017e-08	9.97036e-08	7.20567e-08	4.94719e-08	2.92392e-08	1.28317e-08	3.9911e-08	1.67211e-08	3.43927e-08	7.46358e-09	9.44603e-09	6.90594e-08
2276.65	8.25	5.78057e-08	2.41744e-24	1.57038e-07	1.62195e-08	1.67019e-08	1.1539e-07	1.36314e-08	9.20301e-08	5.303e-08	4.65185e-08	5.43355e-08	4.31858e-08	2.96112e-08	8.05064e-08	7.77888e-08	-6.77598e-08	5.49909e-08
2285.07	8.25	2.20032e-08	0	0	5.47813e-09	4.28831e-09	3.69822e-09	6.0345e-09	0	5.05963e-08	2.53659e-08	3.93072e-09	3.35332e-08	4.17663e-09	2.59616e-09	5.2132e-08	2.3001e-08	6.36654e-09
2293.48	8.25	0	0	0	0	6.6782e-09	1.53007e-08	0	1.10739e-08	1.23082e-08	1.14446e-08	0	2.53535e-08	-6.51687e-09	2.0899e-08	2.81705e-08	4.67945e-08	9.46248e-08
2301.9	8.25	3.36701e-08	0	0	0	-2.68152e-08	-8.72693e-09	2.8447e-09	3.99536e-09	1.40752e-08	6.62008e-09	1.42535e-08	3.44261e-09	0	0	0	0	-2.06338e-09
2310.32	8.25	0	2.38538e-08	0	2.67463e-09	0	0	0	0	2.07495e-08	1.26257e-08	-1.2628e-08	7.06204e-09	8.04481e-09	-2.20905e-08	-1.21695e-08	1.37571e-08	5.03341e-08
2318.73	8.25	0	5.61518e-09	0	0	1.49854e-08	6.58952e-08	0	2.94632e-08	5.28329e-09	4.1435e-09	1.63134e-08	-4.96192e-09	0	3.37314e-08	2.60302e-08	1.26777e-07	4.52711e-08
2327.15	8.25	0	0	0	0	0	0	0	0	5.20028e-09	7.54785e-09	0	0	-1.63629e-08	-2.2603e-08	0	0	-4.60048e-08
2335.57	8.25	0	0	0	0	0	3.1389e-09	0	0	3.80512e-09	0	0	-1.54939e-24	2.05183e-08	-3.61804e-08	-2.70204e-08	0	1.08161e-08
2343.98	8.25	0	0	0	0	-4.34957e-09	1.39026e-08	0	9.33119e-09	0	0	0	5.65341e-09	0	0	0	-5.66671e-08	9.09209e-09
2352.4	8.25	0	0	0	0	0	0	0	3.58672e-09	-6.41826e-09	0	0	0	0	8.5275e-09	0	0	0
2360.82	8.25	0	0	0	0	1.16231e-09	0	0	-1.26755e-08	-4.06472e-09	0	0	0	2.47013e-24	0	0	-8.27375e-08	1.25997e-08
2369.23	8.25	0	0	2.44482e-09	6.84081e-09	6.3826e-09	0	0	1.20628e-08	0	7.6408e-09	8.43602e-09	0	2.3831e-08	0	1.29663e-23	3.90277e-08	-1.29214e-08
2377.65	8.25	0	-3.72441e-09	0	2.99585e-09	0	0	0	1.42124e-09	0	0	1.08413e-09	0	-5.72321e-09	0	0	0	1.06341e-09
2386.07	8.25	0	0	0	0	0	6.27193e-09	0	4.61024e-09	1.92275e-08	3.9233e-25	0	-1.65147e-24	-6.63779e-10	-1.83102e-08	1.96601e-23	1.87874e-23	-3.04091e-09
2394.48	8.25	0	0	0	5.4984e-24	0	2.71989e-09	7.14015e-10	7.75295e-09	0	2.61387e-09	0	-3.57978e-24	1.27597e-08	1.36448e-08	-4.02863e-08	-9.74692e-09	-9.95208e-09
2402.9	8.25	0	0	0	6.8176e-09	0	0	1.06398e-08	0	0	-5.32417e-09	0	0	9.67751e-09	0	-1.09302e-08	0	1.81266e-08
2411.32	8.25	0	1.93288e-24	6.1301e-09	0	1.06297e-08	5.5654e-09	0	0	0	6.63294e-09	1.16468e-08	-3.49423e-09	0	-6.47853e-09	2.42021e-08	-1.90133e-08	1.93973e-08
2419.73	8.25	0	1.54503e-08	0	-3.12755e-09	4.68537e-09	6.41859e-09	0	1.31052e-08	-2.72391e-09	5.82909e-09	-9.37109e-09	0	1.29598e-08	6.59903e-09	-6.98548e-08	5.1982e-09	2.13749e-08
2428.15	8.25	0	-4.1504e-08	1.12794e-08	0	2.81237e-08	1.0722e-08	0	0	1.53765e-08	8.09658e-09	0	0	2.21847e-08	1.46326e-08	0	1.83234e-23	4.48253e-09
2436.57	8.25	4.28579e-08	0	0	0	0	1.73845e-08	1.93083e-08	-9.02571e-09	1.49688e-08	-2.733e-24	7.99231e-09	4.81554e-09	2.72998e-08	0	0	-1.04933e-08	-1.60882e-08
2444.98	8.25	0	5.58733e-09	1.08112e-08	3.1991e-24	2.14063e-08	9.29987e-09	0	-1.01139e-24	-3.3783e-09	-3.58155e-09	0	4.59715e-09	0	0	-1.27466e-08	-8.91111e-10	-3.77311e-08
2453.4	8.25	0	1.64479e-24	7.98116e-09	2.14801e-08	0	0	1.73817e-08	1.90945e-08	0	2.50782e-08	1.93132e-24	6.65027e-09	0	0	1.65727e-08	4.18402e-09	1.76641e-08
2461.82	8.25	0	0	0	5.82859e-09	4.44272e-09	6.73289e-09	3.08783e-08	2.48953e-09	1.77323e-08	1.31762e-08	2.7069e-08	0	0	5.61335e-24	1.27236e-08	4.2017e-08	2.29554e-08
2470.23	8.25	4.88535e-08	1.40995e-07	8.43795e-08	3.08253e-08	7.90387e-08	1.16983e-07	4.3516e-08	7.33872e-08	8.12617e-08	4.8949e-08	4.15085e-08	4.59021e-08	8.61381e-08	1.01877e-07	1.84449e-08	3.08198e-08	4.66204e-08
2478.65	8.25	2.38783e-07	2.60804e-07	2.33606e-07	2.31434e-07	2.52079e-07	2.16888e-07	2.54442e-07	2.38683e-07	2.3754e-07	2.50938e-07	2.13639e-07	2.26678e-07	2.16681e-07	2.07235e-07	1.82509e-07	2.06506e-07	2.43339e-07
2487.07	8.25	5.76056e-06	5.77788e-06	5.82955e-06	5.78872e-06	5.89479e-06	5.81817e-06	5.78866e-06	5.82445e-06	5.97984e-06	6.12025e-06	6.07684e-06	6.2532e-06	6.1706e-06	6.45205e-06	7.71653e-06	9.82228e-06	1.29225e-05
2495.48	8.25	1.78319e-06	1.68242e-06	1.60468e-06	1.63037e-06	1.62143e-06	1.65602e-06	1.59527e-06	1.57406e-06	1.63222e-06	1.63228e-06	1.61408e-06	1.59406e-06	1.65959e-06	1.7019e-06	1.55156e-06	1.83535e-06	2.03402e-06
2503.9	8.25	1.55524e-06	1.2908e-06	1.33041e-06	1.38683e-06	1.35381e-06	1.31861e-06	1.30094e-06	1.35805e-06	1.33789e-06	1.27559e-06	1.27997e-06	1.30239e-06	1.27874e-06	1.27895e-06	1.30595e-06	1.3774e-06	1.51083e-06
2512.32	8.25	1.55419e-06	1.16306e-06	1.211e-06	1.26489e-06	1.17078e-06	1.18918e-06	1.28065e-06	1.28045e-06	1.22727e-06	1.1824e-06	1.16597e-06	1.20549e-06	1.25088e-06	1.21651e-06	1.13019e-06	1.23755e-06	1.33877e-06
2520.73	8.25	1.23733e-06	9.06282e-07	9.2572e-07	9.62982e-07	7.97969e-07	8.84018e-07	7.63003e-07	8.72741e-07	8.96341e-07	9.56703e-07	8.51916e-07	7.82882e-07	9.19436e-07	6.87095e-07	9.01422e-07	7.53059e-07	7.35248e-07

## Sheet: k_GF5
Wavelength	FWHM	k_Summer_L	k_Summer_M	k_Summer_H	k_Winter_L	k_Winter_M	k_Winter_H	k_1976_L	k_1976_M	k_1976_H
1004.77	7.67828	0	0	0	0	0	0	0	0	0	0	0	0	0	0	0	0	0
1013.2	7.68189	0	0	0	0	0	0	0	0	0	0	0	0	0	0	0	0	0
1021.62	7.68551	0	0	0	0	0	0	0	0	0	0	0	0	0	0	0	0	0
1030.05	7.68912	0	0	0	0	0	0	0	0	0	0	0	0	0	0	0	0	0
1038.48	7.69273	6.65552e-07	5.49519e-07	5.63666e-07	5.5098e-07	6.08637e-07	5.9512e-07	6.18808e-07	5.64762e-07	5.49457e-07	5.49682e-07	5.47265e-07	5.41913e-07	5.21503e-07	5.1108e-07	4.94245e-07	4.59773e-07	4.43972e-07
1046.91	7.69634	6.21907e-07	4.22616e-07	4.77892e-07	4.36979e-07	4.54277e-07	4.53961e-07	4.22918e-07	4.14016e-07	3.7863e-07	3.5813e-07	2.95027e-07	2.59867e-07	1.71342e-07	2.02555e-08	-2.26353e-07	-4.77685e-07	-5.89668e-07
1055.33	7.69995	6.66088e-07	5.80217e-07	5.7793e-07	6.10567e-07	6.20762e-07	5.40622e-07	5.41104e-07	5.14984e-07	4.66974e-07	4.38211e-07	3.71761e-07	3.18729e-07	2.97075e-07	2.49711e-07	1.39335e-07	1.63558e-08	-5.75223e-08
1063.76	7.70356	3.05382e-07	2.42426e-07	2.63387e-07	2.4036e-07	2.5791e-07	2.56508e-07	2.44692e-07	2.45028e-07	2.51843e-07	2.4358e-07	2.53293e-07	2.39194e-07	2.40964e-07	2.20014e-07	2.14267e-07	1.86433e-07	1.77281e-07
1072.19	7.70718	5.09477e-08	3.53435e-08	1.3882e-08	2.40236e-08	4.73009e-08	3.46147e-08	4.62723e-08	4.11109e-08	2.47456e-08	3.56618e-08	4.59842e-08	3.28922e-08	4.99964e-08	4.64377e-08	3.20865e-08	2.35133e-08	9.79937e-09
1080.62	7.71079	6.43341e-09	0	4.69989e-09	4.53943e-09	9.64224e-09	7.15302e-09	5.62737e-09	4.16532e-09	5.13468e-09	7.14928e-09	3.0407e-09	3.13123e-09	-5.0285e-09	6.90987e-10	5.12289e-09	2.10759e-24	1.91455e-08
1089.04	7.7144	3.81616e-09	0	3.6971e-09	-1.1934e-25	-1.99491e-09	9.28122e-10	2.29472e-09	1.98375e-09	2.36909e-09	-6.24204e-10	0	1.20457e-09	-2.57956e-09	-4.99508e-10	0	3.60801e-09	0
1097.47	7.71801	0	0	2.10897e-09	1.93214e-09	-6.10527e-10	3.11996e-10	7.42546e-10	0	0	1.59411e-09	0	1.40094e-09	-1.02023e-09	3.25542e-09	2.22682e-09	-1.64094e-08	0
1105.9	7.72162	0	2.79119e-25	0	0	9.1331e-10	0	9.5303e-10	0	0	0	0	0	0	0	0	0	0
1114.32	7.72523	2.04942e-10	1.49058e-09	2.23994e-09	4.40457e-09	-1.53211e-10	-2.54312e-09	1.63346e-09	2.03414e-25	0	4.26967e-09	2.60377e-09	0	0	0	1.55764e-08	2.77711e-08	-2.29648e-09
1122.75	7.72885	-6.25842e-10	0	0	0	0	0	0	0	4.19537e-10	0	0	0	0	0	0	0	0
1131.18	7.73246	0	1.72387e-09	1.50566e-09	0	4.30285e-09	1.58312e-09	7.15594e-10	1.59732e-24	3.93329e-09	5.68768e-09	-1.39185e-09	2.19508e-09	1.27483e-09	5.78289e-09	0	0	0
1139.61	7.73607	0	0	0	0	1.15607e-10	0	0	0	-3.78451e-09	0	-3.67279e-11	0	0	0	0	8.97193e-26	0
1148.03	7.73968	0	1.5221e-09	0	0	7.73272e-10	0	0	0	0	0	0	3.36073e-09	0	0	0	4.02486e-09	0
1156.46	7.74329	0	0	0	4.36495e-10	0	0	0	0	0	0	0	0	0	0	0	0	0
1164.89	7.7469	0	0	0	0	0	-8.73431e-10	0	0	3.21498e-09	0	0	0	0	0	0	0	-1.62446e-08
1173.32	7.75052	3.69005e-09	0	0	0	0	0	0	2.85618e-09	0	0	0	0	0	0	0	0	0
1181.74	7.75413	0	0	0	0	0	0	0	0	0	0	0	0	0	0	0	0	0
1190.17	7.75774	0	0	0	0	1.72562e-09	2.64269e-10	-7.73496e-10	0	0	0	0	0	0	0	0	0	0
1198.6	7.76135	0	3.34467e-10	4.72329e-09	7.85925e-09	5.73481e-09	5.44898e-09	1.72428e-09	0	2.84236e-09	1.97868e-09	0	2.63846e-09	1.30287e-08	-4.45423e-09	-1.08972e-09	-1.47901e-08	0
1206.8	7.3271	4.39726e-05	4.00954e-05	3.98971e-05	3.97031e-05	3.95843e-05	3.93882e-05	3.92147e-05	3.89227e-05	3.86646e-05	3.83358e-05	3.78701e-05	3.75145e-05	3.65568e-05	3.53449e-05	3.42469e-05	3.15113e-05	3.0979e-05
1215.2	7.76857	9.00981e-06	7.76081e-06	7.71927e-06	7.65728e-06	7.61359e-06	7.53636e-06	7.51205e-06	7.38853e-06	7.26843e-06	7.19906e-06	7.05653e-06	6.96348e-06	6.79494e-06	6.60491e-06	6.49741e-06	5.47811e-06	5.21399e-06
1223.6	8.1949	1.97434e-05	1.76443e-05	1.7557e-05	1.74679e-05	1.73901e-05	1.72983e-05	1.7222e-05	1.70771e-05	1.69046e-05	1.68049e-05	1.66367e-05	1.65314e-05	1.60588e-05	1.54705e-05	1.49866e-05	1.32914e-05	1.34054e-05
1232.34	8.48475	1.80382e-06	1.55677e-06	1.54791e-06	1.54179e-06	1.51543e-06	1.51681e-06	1.50688e-06	1.49131e-06	1.48673e-06	1.45267e-06	1.43205e-06	1.43329e-06	1.40545e-06	1.34526e-06	1.34309e-06	1.09326e-06	1.10324e-06
1240.76	8.26	4.63494e-07	4.09291e-07	3.95602e-07	3.94499e-07	3.76822e-07	3.83556e-07	3.75844e-07	3.76971e-07	3.92441e-07	3.741e-07	3.60798e-07	3.55279e-07	3.47401e-07	3.17452e-07	3.24193e-07	3.26062e-07	3.05505e-07
1249.21	7.78302	1.43713e-07	1.17065e-07	1.23876e-07	1.14527e-07	1.25159e-07	1.17383e-07	1.18257e-07	1.12993e-07	1.1212e-07	1.12997e-07	1.11881e-07	1.1714e-07	1.04886e-07	1.1267e-07	1.14012e-07	8.03104e-08	1.20863e-07
1257.66	7.78663	1.91282e-07	1.90261e-07	1.63525e-07	1.77194e-07	1.78354e-07	1.51084e-07	1.61603e-07	1.69324e-07	1.6658e-07	1.7604e-07	1.57248e-07	1.60834e-07	1.79406e-07	1.90167e-07	1.45699e-07	1.12467e-07	1.96828e-07
1266.1	7.79024	2.2912e-07	2.21025e-07	2.33395e-07	2.18924e-07	1.92676e-07	2.10662e-07	2.28562e-07	2.2625e-07	2.21774e-07	1.84219e-07	1.93799e-07	2.06348e-07	2.16354e-07	1.92533e-07	1.78992e-07	1.85604e-07	1.6152e-07
1274.55	7.79386	0	2.84141e-09	6.80315e-09	0	0	8.96071e-10	-4.9904e-09	0	-3.50563e-09	4.74591e-09	1.35544e-08	1.48645e-08	2.63875e-09	-4.77826e-09	0	1.81359e-08	0
1283	7.79747	4.9438e-08	2.48194e-08	2.20993e-08	3.35955e-08	3.68404e-08	3.26942e-08	2.50562e-08	2.00931e-08	3.29286e-08	2.66902e-08	3.41133e-08	1.94883e-08	3.02774e-08	3.2734e-08	1.11441e-08	4.82182e-08	4.46783e-08
1291.45	7.80108	2.29711e-06	1.95893e-06	1.9513e-06	1.92436e-06	1.91014e-06	1.93046e-06	1.95453e-06	1.91275e-06	1.99546e-06	1.93437e-06	2.03847e-06	2.1178e-06	2.12932e-06	2.09775e-06	1.75326e-06	6.83757e-07	-7.26355e-07
1299.9	7.80469	3.89571e-07	3.39988e-07	3.48679e-07	3.40784e-07	3.46573e-07	3.26504e-07	3.55855e-07	3.38838e-07	3.19837e-07	3.06842e-07	3.27169e-07	2.81656e-07	3.15805e-07	3.11331e-07	2.60268e-07	2.41331e-07	3.09828e-07
1308.34	7.8083	4.22224e-08	4.96872e-08	3.70812e-08	3.2845e-08	3.33701e-08	3.11839e-08	4.00459e-08	3.75482e-08	2.57852e-08	5.153e-08	5.70175e-08	5.00377e-08	6.07736e-08	2.6629e-08	4.69297e-08	3.55635e-08	4.59636e-09
1316.79	7.81191	9.04806e-06	8.33585e-06	8.3193e-06	8.26947e-06	8.2712e-06	8.21731e-06	8.19865e-06	8.14344e-06	8.08543e-06	8.04224e-06	7.96969e-06	7.86966e-06	7.63807e-06	7.39856e-06	7.18075e-06	7.67349e-06	9.03319e-06
1325.24	7.81553	8.7488e-07	7.35185e-07	7.5e-07	7.4193e-07	7.36741e-07	7.341e-07	7.29435e-07	7.19093e-07	7.08612e-07	6.76142e-07	7.05249e-07	6.24558e-07	5.61695e-07	5.11556e-07	5.86278e-07	5.61316e-07	2.33374e-07
1333.69	7.81914	7.73562e-07	7.00937e-07	7.29322e-07	7.18142e-07	7.44408e-07	7.00326e-07	6.95236e-07	6.39116e-07	6.93171e-07	6.16721e-07	6.21983e-07	6.18439e-07	6.01693e-07	5.59392e-07	6.03048e-07	6.17398e-07	4.85531e-07
1342.14	7.82275	3.35131e-06	3.20132e-06	3.21719e-06	3.22608e-06	3.20239e-06	3.22267e-06	3.20749e-06	3.22186e-06	3.15095e-06	3.15735e-06	3.12251e-06	3.0821e-06	3.13247e-06	3.05863e-06	3.08063e-06	3.1263e-06	3.20841e-06
1350.58	7.82636	3.66295e-07	3.17849e-07	2.52275e-07	2.94168e-07	2.34242e-07	2.45623e-07	3.21857e-07	2.38854e-07	2.81937e-07	2.49822e-07	2.37788e-07	2.8766e-07	3.43178e-07	2.09669e-07	3.09219e-07	2.37336e-07	2.95178e-07
1359.03	7.82997	6.4955e-08	9.10245e-08	9.13712e-08	9.29991e-08	8.13315e-08	9.68296e-08	9.42738e-08	9.30343e-08	8.53263e-08	9.43454e-08	1.00238e-07	9.01482e-08	9.853e-08	8.51259e-08	9.89238e-08	1.06312e-07	1.05125e-07
1367.48	7.83358	5.27015e-07	5.97063e-07	6.06762e-07	6.05824e-07	6.04315e-07	5.97265e-07	6.15885e-07	6.05966e-07	6.07602e-07	6.01964e-07	5.95406e-07	6.17423e-07	5.99816e-07	6.19947e-07	6.18854e-07	6.3628e-07	6.71036e-07
1375.93	7.8372	3.95321e-07	4.08029e-07	4.1968e-07	4.06614e-07	3.77566e-07	4.6993e-07	4.49561e-07	3.99422e-07	5.17172e-07	3.83457e-07	4.40016e-07	4.13813e-07	4.36506e-07	4.27724e-07	4.53122e-07	4.93033e-07	5.27152e-07
1384.37	7.84081	6.28589e-08	3.52144e-08	3.25126e-08	3.93353e-08	4.17941e-08	3.19957e-08	3.23954e-08	2.59594e-08	3.16734e-08	3.53216e-08	4.13644e-08	2.93884e-08	5.59322e-08	4.29448e-08	4.95664e-08	4.54349e-08	4.14633e-08
1392.82	7.84442	-3.84398e-09	3.4837e-08	-4.76801e-09	-9.43365e-09	7.36419e-09	-7.22114e-09	-4.68532e-09	-5.4929e-09	8.49095e-10	-1.076e-09	-2.39853e-10	-7.51419e-09	-1.08751e-08	-6.83274e-09	-1.39264e-09	-4.50511e-10	-1.47131e-08
1401.27	7.84803	-2.08028e-11	3.01964e-09	2.282e-09	3.04708e-09	2.527e-09	4.53671e-09	4.55929e-09	7.0151e-09	8.86039e-09	2.8602e-09	4.0297e-10	7.59064e-09	-2.07566e-09	3.86615e-09	1.84156e-10	7.61117e-10	-4.20922e-09
1409.72	7.85164	1.11675e-09	0	1.78278e-09	1.88779e-09	3.01258e-09	3.56806e-08	6.0553e-09	-4.64633e-09	3.99169e-08	-4.79722e-09	-5.30637e-09	-6.53751e-09	-2.13492e-09	4.46758e-09	-3.19038e-09	3.01942e-09	-3.29127e-09
1418.17	7.85525	-1.796e-10	1.24301e-08	-2.59811e-09	-6.6544e-10	-1.32716e-09	-3.95501e-10	-2.21352e-08	2.20944e-08	7.80552e-09	-7.31712e-10	-3.1946e-09	-1.56339e-09	-3.48184e-10	0	-1.77459e-08	2.38437e-09	-2.79771e-09
1426.61	7.85887	9.54678e-07	6.20986e-07	5.49774e-07	5.30528e-07	5.34737e-07	5.16692e-07	5.43331e-07	5.1958e-07	4.85867e-07	4.91919e-07	4.91907e-07	4.86117e-07	4.06423e-07	4.06543e-07	3.75516e-07	3.64337e-07	3.51521e-07
1435.06	7.86248	0.000323845	0.000280658	0.000279379	0.000277992	0.000276721	0.000275352	0.000274056	0.000271265	0.000268674	0.000265872	0.000260317	0.000254639	0.00024839	0.000238543	0.000220821	0.000201519	0.000182551
1443.51	7.86609	0.000140339	0.000114582	0.00011413	0.000113531	0.000113001	0.000112494	0.000111941	0.000110918	0.000109837	0.000108826	0.000106953	0.00010506	0.000102689	9.92293e-05	9.34235e-05	8.70622e-05	8.16574e-05
1451.96	7.8697	1.04269e-05	9.39791e-06	9.40473e-06	9.34595e-06	9.32301e-06	9.31155e-06	9.23684e-06	9.25426e-06	9.26062e-06	9.24481e-06	9.23896e-06	9.29002e-06	9.32629e-06	9.32609e-06	9.5019e-06	9.93232e-06	1.03383e-05
1460.4	7.87331	4.72538e-07	3.45141e-07	3.61915e-07	3.35284e-07	3.51272e-07	3.52288e-07	3.29603e-07	3.47791e-07	3.38418e-07	3.27129e-07	3.32912e-07	3.53772e-07	2.92098e-07	3.21985e-07	3.01361e-07	2.53432e-07	3.1837e-07
1468.85	7.87692	4.56192e-06	4.25499e-06	4.22092e-06	4.24756e-06	4.22579e-06	4.23518e-06	4.23821e-06	4.26055e-06	4.23887e-06	4.21242e-06	4.27587e-06	4.22848e-06	4.20929e-06	4.24272e-06	4.2262e-06	4.26621e-06	4.31652e-06
1477.3	7.88054	9.77555e-06	9.83053e-06	9.82424e-06	9.78873e-06	9.83342e-06	9.80642e-06	9.78882e-06	9.80274e-06	9.79228e-06	9.78635e-06	9.83104e-06	9.85111e-06	9.94876e-06	1.01851e-05	1.07162e-05	1.11714e-05	1.18467e-05
1485.75	7.88415	1.81194e-06	1.73827e-06	1.73316e-06	1.7172e-06	1.7356e-06	1.7132e-06	1.74136e-06	1.72087e-06	1.75349e-06	1.74828e-06	1.72471e-06	1.73544e-06	1.77258e-06	1.68004e-06	1.81272e-06	1.75657e-06	1.86954e-06
1494.2	7.88776	3.34713e-06	2.83577e-06	2.81253e-06	2.75981e-06	2.74384e-06	2.65602e-06	2.61688e-06	2.57132e-06	2.40254e-06	2.29121e-06	2.16312e-06	2.02627e-06	1.87155e-06	1.60575e-06	1.60249e-06	8.29203e-07	4.19502e-07
1502.64	7.89137	5.25609e-07	5.30243e-07	5.00343e-07	5.40496e-07	4.89015e-07	5.05564e-07	4.91611e-07	5.17119e-07	4.96606e-07	5.06882e-07	5.28391e-07	4.86666e-07	4.79145e-07	4.99846e-07	5.44764e-07	5.7138e-07	5.78084e-07
1511.09	7.89498	1.15759e-08	1.00304e-08	1.10191e-08	1.08081e-08	6.16074e-08	3.07205e-08	1.14577e-08	7.61596e-09	1.23888e-08	3.37292e-08	4.48268e-09	0	0	5.3539e-09	2.12824e-08	-1.02241e-08	1.80229e-08
1519.54	7.89859	1.41481e-07	1.28258e-07	1.4374e-07	1.00031e-07	1.3146e-07	1.31734e-07	1.2531e-07	1.15916e-07	1.06118e-07	9.05658e-08	1.30705e-07	6.39235e-08	1.64969e-07	8.82641e-08	1.16073e-07	9.44411e-08	8.78617e-08
1527.99	7.90221	6.73689e-06	5.77475e-06	5.68468e-06	5.64321e-06	5.60976e-06	5.5033e-06	5.35404e-06	5.25288e-06	4.95967e-06	4.70438e-06	4.5948e-06	4.49484e-06	4.14648e-06	4.26099e-06	3.96067e-06	9.61966e-07	6.87859e-07
1536.43	7.90582	3.93726e-05	3.64721e-05	3.62766e-05	3.60979e-05	3.58959e-05	3.5731e-05	3.55513e-05	3.52952e-05	3.49893e-05	3.4816e-05	3.45524e-05	3.45906e-05	3.35191e-05	3.20901e-05	3.11943e-05	2.61491e-05	2.75387e-05
1544.88	7.90943	1.3848e-05	1.242e-05	1.23876e-05	1.23184e-05	1.22398e-05	1.21805e-05	1.2152e-05	1.20465e-05	1.19526e-05	1.18232e-05	1.16237e-05	1.14871e-05	1.1112e-05	1.0637e-05	1.09295e-05	8.70125e-06	8.49378e-06
1553.33	6.6598	2.46605e-07	2.49846e-07	2.27723e-07	1.85261e-07	2.54816e-07	1.98645e-07	2.24776e-07	2.48988e-07	2.21557e-07	2.1414e-07	2.16848e-07	2.51634e-07	1.82645e-07	1.50531e-07	2.14861e-07	6.31495e-08	1.65643e-07
1560.93	8.4042	4.22735e-07	3.65119e-07	3.50367e-07	3.60155e-07	3.30702e-07	3.22831e-07	3.267e-07	3.07804e-07	3.32264e-07	3.56171e-07	3.11616e-07	3.00846e-07	2.90844e-07	3.48831e-07	2.60564e-07	3.54883e-07	2.58017e-07
1569.23	7.8809	0.000134374	0.000137234	0.000136395	0.000135728	0.000135001	0.000134107	0.000133508	0.000132044	0.000130911	0.000129828	0.000128119	0.00012646	0.000122733	0.000117368	0.000110234	9.72623e-05	9.45213e-05
1577.61	7.45885	0.00017906	0.000190966	0.000189926	0.000188968	0.000188022	0.000187059	0.000186193	0.000184369	0.000182723	0.000181407	0.000178841	0.000177074	0.000172849	0.00016701	0.00015904	0.000139188	0.000128216
1586.31	7.4983	2.17418e-05	1.97464e-05	1.95691e-05	1.94216e-05	1.92411e-05	1.91964e-05	1.90509e-05	1.88484e-05	1.86976e-05	1.84714e-05	1.81039e-05	1.77048e-05	1.68996e-05	1.5987e-05	1.54699e-05	1.18284e-05	1.21617e-05
1594.96	7.7622	8.48942e-06	7.19634e-06	7.183e-06	7.2347e-06	7.17046e-06	7.1756e-06	7.08802e-06	7.15798e-06	7.17906e-06	7.16688e-06	7.308e-06	7.61225e-06	7.30384e-06	6.82024e-06	5.68249e-06	3.28825e-06	3.53209e-06
1603.38	7.93471	0.000204583	0.000224864	0.000223737	0.000222566	0.0002215	0.000220324	0.000219416	0.000217293	0.000215435	0.000213826	0.00021056	0.000208049	0.00020253	0.000193714	0.000181967	0.000156949	0.000144914
1611.79	7.93832	0.000134905	0.000143699	0.000142877	0.000142005	0.000141176	0.000140655	0.000139695	0.000138427	0.000137003	0.000136112	0.000133764	0.000132043	0.000128267	0.00012264	0.0001162	9.84457e-05	9.39042e-05
1620.21	7.94194	1.47001e-05	1.21408e-05	1.19206e-05	1.19529e-05	1.18153e-05	1.1669e-05	1.1493e-05	1.13488e-05	1.10293e-05	1.09648e-05	1.04589e-05	1.00917e-05	9.53018e-06	9.06933e-06	9.19563e-06	8.26578e-06	8.76234e-06
1628.63	7.94555	4.08796e-06	3.68893e-06	3.71415e-06	3.5228e-06	3.3508e-06	3.35281e-06	3.08176e-06	3.09583e-06	2.65185e-06	2.57635e-06	2.64463e-06	2.62736e-06	2.65448e-06	2.27733e-06	1.30747e-06	-1.07601e-06	-1.64561e-06
1637.05	7.94916	1.1792e-05	1.06705e-05	1.07129e-05	1.05496e-05	1.0466e-05	1.04297e-05	1.02978e-05	1.01613e-05	1.01499e-05	1.01557e-05	1.00198e-05	1.00621e-05	9.71445e-06	9.10906e-06	8.14484e-06	5.43616e-06	6.14116e-06
1645.47	7.95277	3.17105e-05	2.96154e-05	2.94992e-05	2.94179e-05	2.92931e-05	2.91659e-05	2.90542e-05	2.88833e-05	2.87492e-05	2.87272e-05	2.87117e-05	2.9047e-05	2.80064e-05	2.67055e-05	2.57553e-05	2.21409e-05	2.56458e-05
1653.89	7.95638	1.40687e-05	1.26116e-05	1.25139e-05	1.24341e-05	1.24142e-05	1.22693e-05	1.23526e-05	1.22335e-05	1.21837e-05	1.20854e-05	1.20792e-05	1.22453e-05	1.18625e-05	1.13558e-05	1.18825e-05	1.05883e-05	1.31667e-05
1662.31	7.95999	2.61124e-06	2.3604e-06	2.25636e-06	2.21236e-06	2.1012e-06	2.07599e-06	2.13556e-06	1.92902e-06	1.94825e-06	1.95076e-06	2.01041e-06	2.04737e-06	1.85581e-06	1.44853e-06	9.27922e-07	-1.48921e-07	-2.71303e-07
1670.73	7.96361	1.04291e-06	8.89008e-07	9.05324e-07	8.88464e-07	8.77034e-07	8.97249e-07	8.71557e-07	8.75591e-07	8.52087e-07	8.44925e-07	8.61675e-07	8.82171e-07	8.22464e-07	7.66099e-07	8.64717e-07	5.99122e-07	7.59736e-07
1679.15	7.96722	2.82554e-07	2.32861e-07	2.59931e-07	2.34692e-07	2.67014e-07	2.24424e-07	2.1218e-07	2.19182e-07	2.606e-07	2.16093e-07	1.79691e-07	1.66528e-07	1.91716e-07	2.25014e-07	1.51827e-07	1.27594e-07	1.90177e-07
1687.57	7.97083	1.05683e-07	9.85422e-08	7.61439e-08	9.63266e-08	1.11011e-07	9.87438e-08	9.2099e-08	5.15752e-08	7.02722e-08	1.31849e-07	9.02735e-08	2.91228e-08	6.92308e-08	1.10008e-07	1.20663e-07	7.07136e-08	8.75713e-08
1695.99	7.97444	2.12704e-08	2.05651e-08	2.14971e-08	1.96438e-08	0	2.65803e-08	3.3956e-08	2.82267e-08	1.17529e-08	5.5683e-08	2.60636e-08	0	4.12057e-08	-1.69477e-08	0	2.73223e-09	3.50314e-09
1704.41	7.97805	8.2027e-09	3.86634e-09	1.51424e-08	9.62159e-09	3.47993e-08	6.47723e-09	7.85073e-09	1.43468e-08	0	0	2.31974e-08	1.90433e-08	1.92332e-08	0	1.47262e-08	1.79196e-10	-5.28363e-09
1712.83	7.98166	8.21482e-09	0	2.45231e-08	5.27174e-09	2.95991e-08	2.62931e-08	0	-1.05863e-08	5.61819e-08	4.54637e-08	0	5.08465e-08	-1.16747e-08	1.96935e-08	8.79932e-09	1.09211e-08	1.44605e-08
1721.25	7.98528	2.01019e-08	9.94471e-09	1.12287e-08	0	4.34964e-08	2.19397e-08	5.41424e-09	9.58595e-09	3.71244e-08	-1.60484e-08	-4.32743e-09	0	1.55262e-08	0	3.43495e-09	3.21172e-09	2.17996e-08
1729.67	7.98889	0	0	6.705e-09	-3.53282e-09	-2.29651e-09	0	0	0	0	0	0	-3.19891e-08	-8.6545e-09	0	1.53563e-08	1.58875e-08	-8.86606e-09
1738.08	7.9925	0	0	0	-2.11496e-09	0	0	0	0	0	0	-3.46317e-08	0	0	0	1.19439e-08	8.1773e-09	-6.43008e-09
1746.5	7.99611	0	0	-2.40852e-09	0	0	0	0	0	-1.62543e-08	0	0	0	0	0	0	-8.82888e-09	4.36727e-25
1754.92	7.99972	2.89058e-07	2.59196e-07	2.66001e-07	2.58456e-07	2.31776e-07	2.26684e-07	2.63889e-07	2.72349e-07	2.70892e-07	2.07062e-07	2.50235e-07	2.30916e-07	1.54673e-07	2.52531e-07	2.74083e-07	2.53599e-07	3.10022e-07
1763.34	8.00333	2.19192e-07	1.56829e-07	1.44237e-07	1.73336e-07	1.66051e-07	1.8628e-07	1.35951e-07	1.49363e-07	2.87818e-07	1.07571e-07	1.56126e-07	2.61262e-07	1.00341e-07	3.78475e-07	1.56041e-07	1.22675e-07	1.61498e-07
1771.76	8.00695	1.27067e-08	5.34585e-08	3.94426e-08	2.98883e-08	7.06672e-08	4.24932e-08	1.16447e-08	0	6.41273e-08	7.04268e-08	1.52733e-08	0	5.72853e-08	6.50428e-08	3.32223e-08	3.57618e-08	5.36953e-08
1780.18	8.01056	0	0	3.07862e-08	3.82209e-08	1.31967e-08	3.36681e-08	0	1.61948e-08	3.0726e-09	-6.43131e-09	0	1.85801e-08	1.56047e-08	-6.08992e-10	3.93158e-09	-1.43706e-09	1.70632e-08
1788.6	8.01417	2.8696e-07	2.57934e-07	2.86324e-07	2.09461e-07	2.61346e-07	2.43704e-07	2.68581e-07	2.96782e-07	2.56352e-07	2.66894e-07	2.75187e-07	1.65963e-07	1.27533e-07	3.10897e-07	2.40581e-07	2.78452e-07	3.22916e-07
1797.02	8.01778	1.01265e-07	1.478e-07	7.64289e-08	1.49776e-07	1.33821e-07	1.69455e-07	1.45878e-07	1.64761e-07	1.61713e-07	7.92244e-08	8.17724e-08	1.40049e-07	9.65737e-08	1.51557e-07	1.68846e-07	2.16268e-07	2.00179e-07
1805.44	8.02139	9.11544e-09	1.31875e-08	1.64786e-08	1.40393e-08	3.36585e-08	3.44332e-08	1.48598e-07	4.41422e-09	8.72068e-09	1.2474e-07	4.83434e-09	4.31065e-08	2.14184e-08	1.60365e-08	3.82756e-09	3.54611e-08	0
1813.86	8.025	7.15158e-09	5.48215e-08	2.26666e-09	9.40064e-09	1.0057e-08	2.23762e-08	-4.09039e-09	-1.15219e-09	2.68807e-10	1.15747e-08	4.9917e-09	1.20024e-08	5.71887e-09	1.58331e-08	1.62381e-08	2.62725e-08	5.30034e-08
1822.28	8.02862	-6.66661e-09	-4.28585e-08	-2.22589e-08	-4.48002e-08	-4.03584e-08	-4.43095e-08	-2.73508e-08	-3.75198e-08	-3.35155e-08	-5.39472e-08	-4.50126e-08	-4.13434e-08	-6.38685e-08	-2.84314e-08	-5.61809e-08	-1.04005e-07	-1.18246e-07
1830.7	8.03223	7.13398e-08	1.32516e-07	1.37875e-07	1.38092e-07	1.33141e-07	1.3857e-07	1.38832e-07	1.15899e-07	1.22788e-07	1.35503e-07	1.09231e-07	1.44668e-07	1.47396e-07	1.52794e-07	1.28488e-07	1.62447e-07	1.44041e-07
1839.12	8.03584	-1.50532e-08	-7.79184e-08	-7.79235e-08	-1.56319e-08	-1.56332e-08	-1.56346e-08	-1.56362e-08	-1.56402e-08	-1.56452e-08	-1.93674e-08	-1.93892e-08	-1.94232e-08	-1.57389e-08	-1.58404e-08	-1.61738e-08	-1.68656e-08	-1.75934e-08
1847.54	8.03945	-2.90429e-08	-5.49274e-08	-5.5005e-08	-5.50874e-08	-5.5175e-08	-5.84619e-08	-5.85657e-08	-5.7414e-08	-5.76596e-08	-5.79332e-08	-5.85756e-08	-5.9365e-08	-1.69126e-08	-6.02444e-08	-6.47313e-08	-7.15458e-08	-7.79119e-08
1855.96	8.04306	-6.75301e-08	-8.95348e-08	-9.80671e-08	-9.02905e-08	-9.0349e-08	-9.04123e-08	-9.04814e-08	-9.06349e-08	-9.0813e-08	-9.10197e-08	-9.15344e-08	-9.22136e-08	-9.31221e-08	-9.4996e-08	-1.00035e-07	-1.08552e-07	-1.16842e-07
1864.38	8.04667	1.39587e-07	1.30063e-07	1.1663e-07	1.73302e-07	1.16079e-07	1.29464e-07	1.20417e-07	1.27877e-07	1.19314e-07	1.30701e-07	1.36293e-07	1.46572e-07	1.29117e-07	1.34677e-07	1.85745e-07	1.73391e-07	1.91613e-07
1872.79	8.05029	1.95767e-05	1.95526e-05	1.94684e-05	1.94405e-05	1.94706e-05	1.95726e-05	1.96163e-05	1.94757e-05	1.9535e-05	1.95121e-05	1.95588e-05	1.95256e-05	1.95904e-05	1.96343e-05	1.96284e-05	1.98567e-05	2.01585e-05
1881.21	8.0539	6.11545e-05	4.56497e-05	4.55704e-05	4.54474e-05	4.54047e-05	4.5266e-05	4.52205e-05	4.50068e-05	4.48194e-05	4.46073e-05	4.411e-05	4.36588e-05	4.31611e-05	4.22854e-05	4.05793e-05	3.86549e-05	3.7174e-05
1889.63	8.05751	1.62029e-05	1.59396e-05	1.59534e-05	1.59569e-05	1.59424e-05	1.59375e-05	1.59561e-05	1.59627e-05	1.59621e-05	1.59432e-05	1.59833e-05	1.60498e-05	1.61489e-05	1.63079e-05	1.68689e-05	1.79395e-05	1.91327e-05
1898.05	8.06112	3.98552e-06	5.5476e-06	5.56118e-06	5.55261e-06	5.6206e-06	5.605e-06	5.64856e-06	5.58481e-06	5.61558e-06	5.69048e-06	5.78057e-06	5.84167e-06	5.99891e-06	6.18628e-06	6.7214e-06	7.38378e-06	8.16634e-06
1906.47	8.06473	2.84201e-06	4.97613e-06	4.9119e-06	4.96893e-06	4.99966e-06	5.00305e-06	4.98614e-06	5.03571e-06	5.0406e-06	5.00198e-06	5.10738e-06	5.26787e-06	5.28097e-06	5.48789e-06	5.93477e-06	6.6724e-06	7.16276e-06
1914.89	8.06834	5.55571e-07	7.94259e-07	7.82139e-07	7.71181e-07	8.165e-07	7.54309e-07	7.79855e-07	7.5352e-07	7.78021e-07	7.24551e-07	8.20235e-07	7.26904e-07	8.23364e-07	7.91494e-07	9.56334e-07	8.83805e-07	1.01641e-06
1923.31	8.07196	5.63276e-07	6.55609e-07	6.11608e-07	6.42992e-07	5.8986e-07	6.35595e-07	6.24867e-07	6.3725e-07	6.25419e-07	6.2868e-07	6.48995e-07	6.11006e-07	6.47107e-07	6.92846e-07	6.99526e-07	7.68303e-07	9.29836e-07
1931.73	8.07557	2.44826e-06	1.92435e-06	1.92383e-06	1.94734e-06	1.85748e-06	1.97846e-06	1.80315e-06	1.90223e-06	1.76005e-06	1.8685e-06	1.84346e-06	1.85416e-06	1.887e-06	1.85075e-06	1.84569e-06	2.11673e-06	2.21304e-06
1940.15	8.07918	0.000145799	9.564e-05	9.48315e-05	9.40639e-05	9.31633e-05	9.24157e-05	9.15954e-05	8.99494e-05	8.83458e-05	8.67968e-05	8.36749e-05	8.05667e-05	7.73735e-05	7.2791e-05	6.55727e-05	5.92698e-05	5.4403e-05
1948.57	8.08279	0.000727356	0.000595218	0.000591455	0.000587864	0.000584197	0.000580561	0.000576823	0.00056938	0.000561927	0.000554341	0.000539041	0.000523482	0.000507129	0.000481009	0.00043167	0.000380099	0.000327561
1956.99	8.0864	0.00155174	0.00122509	0.00121907	0.00121301	0.00120693	0.00120083	0.00119457	0.0011819	0.00116894	0.00115578	0.0011287	0.00110042	0.00106991	0.00102021	0.000922556	0.000816196	0.000716764
1965.41	8.09001	0.00115347	0.000980679	0.00097581	0.000970916	0.000965704	0.000960917	0.000955838	0.000945551	0.000935625	0.000925489	0.000905193	0.000884377	0.000862376	0.000827732	0.000762064	0.000693859	0.000623133
1973.83	8.09363	0.000356765	0.000343526	0.000341655	0.000339945	0.00033814	0.000336461	0.000334593	0.0003311	0.000327559	0.000324057	0.000316785	0.00030952	0.000300943	0.000287005	0.000259248	0.000227675	0.000194523
1982.25	8.09724	6.3247e-05	5.61492e-05	5.57411e-05	5.54304e-05	5.52925e-05	5.47849e-05	5.46977e-05	5.38894e-05	5.35982e-05	5.32729e-05	5.25329e-05	5.20777e-05	5.10854e-05	4.91522e-05	4.73544e-05	4.00081e-05	4.05313e-05
1990.67	8.10085	5.36634e-05	4.96042e-05	4.95653e-05	4.91794e-05	4.91415e-05	4.91018e-05	4.90878e-05	4.89542e-05	4.89719e-05	4.91444e-05	4.9626e-05	5.08084e-05	4.98451e-05	4.87995e-05	4.89983e-05	4.62852e-05	5.29799e-05
1999.09	8.10446	0.0012405	0.00109927	0.001095	0.00109093	0.00108655	0.00108239	0.00107812	0.00106936	0.00106041	0.00105128	0.00103236	0.00101245	0.00099191	0.000957977	0.000886186	0.00081057	0.000728988
2007.5	8.10807	0.00279222	0.00228295	0.00227099	0.00225888	0.00224663	0.00223423	0.00222165	0.00219614	0.00216988	0.00214294	0.00208661	0.00202646	0.00196847	0.00187213	0.00167442	0.00147463	0.00127538
2015.92	8.11168	0.00277614	0.00215797	0.00214497	0.00213194	0.00211879	0.00210562	0.00209224	0.00206542	0.00203815	0.00201038	0.00195337	0.00189379	0.00183536	0.00174051	0.00155221	0.00136743	0.00117997
2024.34	8.1153	0.00083402	0.000746641	0.000742615	0.000738621	0.000734606	0.000730665	0.00072667	0.000718584	0.000710651	0.000702553	0.000686096	0.000669096	0.000652681	0.000626074	0.000573481	0.000518674	0.000458356
2032.76	8.11891	0.00030209	0.0002761	0.000274154	0.000272455	0.000270803	0.000269214	0.00026766	0.000264666	0.00026177	0.000259249	0.000255009	0.000251675	0.000243754	0.000233398	0.000218941	0.000185489	0.000187051
2041.18	8.12252	0.000309066	0.000306255	0.000305131	0.000303468	0.000302371	0.000300997	0.000299532	0.000297265	0.000295057	0.000293118	0.000289925	0.000288962	0.000283099	0.00027395	0.000259124	0.000224578	0.000216369
2049.6	8.12613	0.00073304	0.000719637	0.000716147	0.000712364	0.000708863	0.000705466	0.000701857	0.000694283	0.000686334	0.000678011	0.0006616	0.000643589	0.000628105	0.000602245	0.000547112	0.000491278	0.000429849
2058.02	8.12974	0.000826612	0.00077501	0.000771096	0.000767427	0.000763648	0.000760168	0.000756367	0.000748618	0.00074137	0.000733423	0.000717776	0.000701143	0.000685397	0.000659638	0.000606797	0.00055371	0.00049721
2066.44	8.13335	0.000910724	0.000823022	0.000818806	0.000814515	0.000810166	0.000805767	0.000801487	0.0007929	0.000784094	0.000775175	0.000756629	0.000737478	0.000720591	0.000693441	0.000639927	0.000588045	0.000533854
2074.86	8.13697	0.00059351	0.000582073	0.000579073	0.000575945	0.000572979	0.000570208	0.0005671	0.00056111	0.000555145	0.000549049	0.000536953	0.000524683	0.000511806	0.000491632	0.000450205	0.000397766	0.000346971
2083.28	8.14058	0.000316264	0.000297177	0.000295269	0.000293503	0.000291847	0.000290106	0.000288404	0.000285261	0.00028237	0.000279519	0.000275165	0.000272328	0.000263982	0.000252238	0.000235782	0.00019776	0.00019348
2091.7	8.14419	0.000188514	0.000172105	0.000170943	0.000169769	0.000168484	0.000167359	0.000166244	0.000164063	0.000162466	0.000160572	0.000157867	0.000156407	0.000150633	0.000143117	0.000136241	0.000105593	0.000112349
2100.12	8.1478	6.57948e-05	6.02907e-05	5.9852e-05	5.95993e-05	5.92691e-05	5.88392e-05	5.87033e-05	5.80902e-05	5.82428e-05	5.83765e-05	5.90558e-05	5.96765e-05	5.77173e-05	5.58996e-05	5.33843e-05	3.54851e-05	5.17701e-05
2108.54	8.4804	2.66177e-05	2.38661e-05	2.37547e-05	2.36782e-05	2.36993e-05	2.35549e-05	2.33963e-05	2.33475e-05	2.33956e-05	2.33571e-05	2.38334e-05	2.44937e-05	2.43388e-05	2.36361e-05	1.78024e-05	1.06125e-05	2.70247e-05
2116.97	8.023	1.85872e-05	1.55137e-05	1.5559e-05	1.48719e-05	1.48037e-05	1.41125e-05	1.39205e-05	1.38722e-05	1.32604e-05	1.24875e-05	1.1855e-05	1.17942e-05	1.01396e-05	8.22567e-06	4.92636e-06	-7.23077e-06	-1.09246e-05
2125.41	8.476	3.03959e-06	2.65377e-06	2.59289e-06	2.52832e-06	2.54311e-06	2.29012e-06	2.29059e-06	2.09793e-06	1.99108e-06	2.02943e-06	1.98236e-06	1.87202e-06	1.66351e-06	1.3695e-06	1.46748e-06	-9.56926e-07	-1.36783e-06
2134.3	8.38695	1.74498e-06	1.45123e-06	1.46862e-06	1.43667e-06	1.44571e-06	1.36404e-06	1.44461e-06	1.36576e-06	1.37213e-06	1.55421e-06	1.36697e-06	1.38431e-06	1.30353e-06	1.18139e-06	1.20493e-06	4.815e-08	8.99487e-07
2142.31	8.12115	2.67216e-06	2.32995e-06	2.46279e-06	2.15631e-06	2.32925e-06	1.92895e-06	2.22349e-06	1.98581e-06	1.6225e-06	1.39387e-06	7.25441e-07	8.18837e-07	4.04758e-07	2.19724e-07	7.65671e-07	-4.06288e-06	-6.62755e-06
2150.88	8.16947	1.93415e-05	1.72076e-05	1.70778e-05	1.67685e-05	1.66105e-05	1.64237e-05	1.62824e-05	1.58719e-05	1.55451e-05	1.50989e-05	1.4606e-05	1.4054e-05	1.46e-05	1.62466e-05	2.30193e-05	1.83534e-05	2.37124e-05
2159.31	8.17308	1.24853e-05	1.0812e-05	1.02781e-05	1.02041e-05	1.02046e-05	1.01289e-05	9.40332e-06	9.13356e-06	8.85983e-06	8.66576e-06	7.98611e-06	7.54107e-06	6.6371e-06	5.24076e-06	2.91361e-06	4.22334e-06	1.51295e-05
2167.73	8.1767	8.89609e-06	8.37478e-06	8.28891e-06	8.23396e-06	7.93846e-06	7.79904e-06	7.84458e-06	7.54325e-06	7.41753e-06	7.21416e-06	7.14284e-06	7.23334e-06	6.69025e-06	5.81142e-06	4.23314e-06	2.86741e-07	3.31059e-06
2176.16	8.18031	2.44666e-06	1.80553e-06	1.69857e-06	1.98024e-06	1.924e-06	2.01874e-06	1.94258e-06	2.18257e-06	2.05e-06	2.16815e-06	2.34691e-06	2.3334e-06	2.10966e-06	1.22281e-06	3.96964e-07	-7.69123e-07	-1.7146e-06
2184.59	8.18392	6.49282e-07	5.75121e-07	4.42665e-07	6.24632e-07	7.90366e-07	6.00316e-07	7.21722e-07	7.08824e-07	6.2103e-07	4.14136e-07	6.23107e-07	5.88623e-07	5.69404e-07	5.5831e-07	5.66582e-07	4.26342e-07	5.21979e-07
2193.01	8.18753	6.73259e-07	7.41534e-07	6.75517e-07	6.52923e-07	5.34495e-07	6.10245e-07	7.2293e-07	6.93867e-07	7.11198e-07	5.42808e-07	5.9889e-07	6.50058e-07	5.98007e-07	5.93081e-07	6.96044e-07	4.24885e-07	8.28479e-07
2201.44	8.19114	1.41242e-07	6.02706e-08	1.06488e-07	1.40367e-07	2.55919e-07	4.32962e-08	4.22539e-08	3.31769e-07	1.71789e-07	9.28408e-08	9.46931e-08	8.26892e-08	5.5006e-08	5.90093e-08	1.3257e-07	4.56278e-08	5.57199e-08
2209.87	8.19475	3.33669e-07	3.44925e-07	2.40367e-07	1.72592e-07	1.90562e-07	2.83286e-07	3.31237e-07	5.08979e-07	2.17003e-07	2.09575e-07	2.54446e-07	2.46758e-07	2.40697e-07	2.20914e-07	3.11218e-07	1.76167e-07	4.1448e-07
2218.3	8.19837	1.85273e-07	2.1879e-07	1.07416e-07	1.4036e-07	2.34945e-07	1.81848e-07	2.04591e-07	2.15911e-07	1.47102e-07	3.64325e-07	1.31403e-07	1.58315e-07	1.20489e-07	1.34187e-07	1.54208e-07	1.39972e-07	2.63875e-07
2226.72	8.20198	2.0074e-07	2.43347e-07	3.06201e-07	1.71991e-07	1.96277e-07	9.01101e-08	3.08649e-07	1.1949e-07	1.33055e-07	2.15719e-07	1.62223e-07	1.64264e-07	1.67711e-07	9.46413e-08	1.63667e-07	4.71805e-08	9.17676e-08
2235.15	8.20559	2.77841e-08	6.17247e-08	1.56442e-07	1.09446e-07	3.07561e-08	1.72108e-23	0	4.95649e-08	0	3.35609e-09	5.67608e-08	3.92942e-08	2.73145e-08	2.75485e-08	2.66372e-08	3.70313e-08	-1.76662e-08
2243.58	8.2092	9.85846e-08	0	1.50543e-08	0	8.40708e-08	7.64164e-08	3.90735e-09	1.00153e-07	1.44159e-08	8.17533e-08	1.64016e-08	3.80849e-08	4.48818e-08	4.22425e-08	4.58683e-08	-1.31509e-08	8.74544e-08
2252.01	8.21281	2.09391e-07	1.31249e-07	1.26173e-07	2.36518e-07	1.81638e-07	1.68833e-07	8.03779e-08	1.07949e-07	2.58176e-07	2.12572e-07	1.61455e-07	1.64655e-07	1.55232e-07	1.63757e-07	2.20049e-07	8.73792e-08	9.16399e-08
2260.43	8.21642	8.84079e-08	1.70819e-07	0	1.62208e-07	1.13633e-07	1.59335e-07	1.00811e-07	1.20624e-07	6.39027e-08	9.95006e-08	1.1685e-07	7.91518e-08	1.37333e-07	9.65397e-08	7.91168e-08	6.33252e-08	0
2268.86	8.22004	0	0	6.52449e-08	0	1.73407e-08	0	1.11261e-07	8.37894e-08	4.75301e-08	2.34413e-08	6.63906e-09	5.18185e-08	2.03957e-08	3.71446e-08	1.08708e-08	2.21178e-08	7.03319e-08
2277.29	8.22365	5.64864e-08	2.11084e-24	1.69849e-07	1.53749e-08	1.58316e-08	1.16482e-07	1.295e-08	9.41082e-08	5.2775e-08	5.10042e-08	5.74028e-08	4.82079e-08	2.80924e-08	8.03954e-08	8.05102e-08	-6.60375e-08	4.46115e-08
2285.71	8.22726	0	0	0	5.05093e-09	4.25666e-09	3.35281e-09	5.34626e-09	0	5.17601e-08	2.47826e-08	4.26109e-09	3.34298e-08	4.72733e-09	2.6342e-09	3.70136e-08	3.19221e-08	7.36048e-09
2294.14	8.23087	0	0	0	0	7.14349e-09	1.61927e-08	0	1.03491e-08	1.21699e-08	1.0025e-08	0	2.3962e-08	-6.53812e-09	2.23838e-08	2.95259e-08	4.91311e-08	9.9432e-08
2302.57	8.23448	3.52045e-08	0	0	0	-3.0703e-08	-7.95858e-09	0	3.29053e-09	1.37629e-08	6.88313e-09	1.36687e-08	2.81724e-09	0	0	0	0	0
2311	8.23809	0	2.12723e-08	0	2.2747e-09	0	0	0	0	1.87532e-08	1.81502e-08	-1.08692e-08	8.88757e-09	1.12922e-08	-1.05886e-08	5.69339e-09	5.21294e-08	8.37033e-08
2319.42	8.24171	0	7.15119e-09	0	0	1.99831e-08	6.88079e-08	0	0	6.11332e-09	-1.91112e-09	1.08764e-08	-3.74191e-09	0	2.66787e-08	0	1.02846e-07	-1.2107e-24
2327.85	8.24532	0	0	0	0	0	0	0	0	4.91204e-09	6.63232e-09	0	-1.94064e-24	-1.71167e-08	-2.40932e-08	0	0	-4.35382e-08
2336.28	8.24893	0	0	0	0	0	4.10569e-09	0	0	1.50414e-09	0	0	0	2.31627e-08	-3.51639e-08	-3.19564e-08	0	9.5374e-09
2344.71	8.25254	0	0	0	0	-5.05277e-09	1.29654e-08	0	8.48037e-09	0	0	0	4.77678e-09	0	0	0	-6.29232e-08	8.50949e-09
2353.13	8.25615	0	0	0	0	0	0	0	3.99082e-09	-1.07664e-08	0	0	0	0	9.261e-09	0	-2.4981e-08	-7.11136e-09
2361.56	8.25976	0	0	0	0	-2.7124e-09	0	0	-1.38123e-08	0	0	0	0	7.77252e-09	0	6.68258e-24	-2.89714e-08	1.27464e-08
2369.99	8.26338	0	0	3.49773e-09	5.28713e-09	6.05002e-09	0	0	1.33235e-08	0	1.09078e-08	6.50379e-09	0	1.21786e-08	0	0	0	-4.21813e-09
2378.41	8.26699	0	-3.14898e-09	0	2.16953e-09	0	0	0	1.5585e-09	0	0	1.46513e-09	0	-1.44396e-08	0	1.58738e-23	0	-2.8846e-09
2386.84	8.2706	0	0	0	0	0	6.00287e-09	-8.53977e-10	4.90442e-09	1.85831e-08	1.7406e-24	0	-1.66144e-24	6.2228e-09	-2.05618e-08	2.42969e-23	-1.0148e-08	-7.42922e-10
2395.27	8.27421	0	0	0	-7.544e-25	0	2.51268e-09	1.44665e-09	7.33666e-09	0	2.26087e-09	0	-3.86594e-24	1.31635e-08	1.31164e-08	-3.57934e-08	-1.90653e-24	-6.92725e-09
2403.7	8.27782	0	0	0	7.69626e-09	0	6.52157e-09	1.38044e-08	0	0	-5.43848e-09	0	0	1.38682e-08	0	-1.0588e-08	0	2.17099e-08
2412.12	8.28143	0	1.82915e-26	7.40923e-09	0	1.08658e-08	0	0	0	0	6.83335e-09	1.40909e-08	-3.11495e-09	0	-8.64876e-09	2.905e-08	-1.97825e-08	1.59455e-08
2420.55	8.28505	0	1.23864e-08	0	-3.9219e-09	3.55789e-09	7.60995e-09	0	1.31383e-08	-3.62789e-09	1.30815e-08	-1.26501e-08	0	1.23405e-08	7.44531e-09	-5.96842e-08	4.23534e-09	1.77488e-08
2428.98	8.28866	0	-3.78734e-08	9.4686e-09	0	2.57999e-08	9.50719e-09	0	0	1.48234e-08	6.25383e-09	0	0	2.27452e-08	1.36472e-08	0	1.40555e-23	3.70021e-09
2437.41	8.29227	4.39794e-08	4.43271e-08	0	0	1.08286e-08	1.75593e-08	2.05264e-08	-8.87334e-09	1.92441e-08	-4.75241e-24	8.13721e-09	5.21756e-09	2.63865e-08	0	3.17212e-08	-9.03084e-09	-1.60918e-08
2445.83	8.29588	0	5.89616e-09	1.33843e-08	6.06238e-24	1.91481e-08	1.92856e-09	3.98808e-09	-1.1153e-24	-2.97321e-09	-3.15061e-09	0	5.3856e-09	0	0	-1.15891e-08	-1.0364e-09	-3.95964e-08
2454.26	8.29949	0	1.38882e-24	8.49798e-09	2.21532e-08	0	1.23253e-08	1.66939e-08	1.39292e-08	0	2.55175e-08	2.52084e-24	7.49586e-09	0	0	1.53477e-08	3.39718e-09	1.30314e-08
2462.69	8.3031	0	0	0	6.58591e-09	1.66944e-08	7.8447e-09	3.56604e-08	2.99136e-09	2.08357e-08	1.48188e-08	2.58546e-08	0	0	1.9461e-23	1.51871e-08	7.06608e-08	2.27535e-08
2471.11	8.30672	1.25884e-08	1.43002e-07	7.7454e-08	3.39613e-08	7.72433e-08	1.19996e-07	5.98819e-08	6.39045e-08	6.38813e-08	4.76527e-08	3.51882e-08	4.22236e-08	7.94454e-08	9.86386e-08	3.40435e-09	3.11788e-08	3.97067e-08
2479.54	8.31033	4.52557e-07	4.41319e-07	4.2323e-07	4.18275e-07	4.33353e-07	3.97731e-07	4.33168e-07	4.1587e-07	4.13487e-07	4.27511e-07	3.70417e-07	3.84789e-07	3.63159e-07	3.44751e-07	3.28945e-07	3.40056e-07	3.72698e-07
2487.97	8.31394	5.27804e-06	5.35015e-06	5.4249e-06	5.37613e-06	5.46722e-06	5.39711e-06	5.38782e-06	5.41503e-06	5.56062e-06	5.67107e-06	5.63452e-06	5.82835e-06	5.74056e-06	5.9924e-06	7.19211e-06	9.17638e-06	1.20728e-05
2496.4	8.31755	1.8339e-06	1.69071e-06	1.62955e-06	1.65927e-06	1.65509e-06	1.68057e-06	1.61336e-06	1.58525e-06	1.65388e-06	1.64949e-06	1.63645e-06	1.61048e-06	1.67855e-06	1.70685e-06	1.59732e-06	1.85895e-06	2.04756e-06
2504.82	8.32116	1.45081e-06	1.09697e-06	1.12435e-06	1.19003e-06	1.13293e-06	1.12857e-06	1.10413e-06	1.17673e-06	1.13456e-06	1.0529e-06	1.07853e-06	1.1038e-06	1.07548e-06	1.07572e-06	1.08839e-06	1.1591e-06	1.26288e-06
2513.25	8.32477	1.73605e-06	1.28317e-06	1.30077e-06	1.37427e-06	1.29549e-06	1.30872e-06	1.37302e-06	1.35997e-06	1.35205e-06	1.30046e-06	1.29188e-06	1.32658e-06	1.36609e-06	1.34441e-06	1.23611e-06	1.35074e-06	1.44583e-06

## Sheet: k_EMIT
Wavelength	FWHM	k_Summer_L	k_Summer_M	k_Summer_H	k_Winter_L	k_Winter_M	k_Winter_H	k_1976_L	k_1976_M	k_1976_H
1006.83	8.529	0	0	0	0	0	0	0	0	0	0	0	0	0	0	0	0	0
1014.29	8.53	0	0	0	0	0	0	0	0	0	0	0	0	0	0	0	0	0
1021.76	8.531	0	0	0	0	0	0	0	0	0	0	0	0	0	0	0	0	0
1029.22	8.533	0	0	0	0	0	0	0	0	0	0	0	0	0	0	0	0	0
1036.68	8.534	5.36992e-07	4.60454e-07	4.64162e-07	4.36841e-07	4.85792e-07	4.50977e-07	4.8632e-07	4.51142e-07	4.38955e-07	4.40627e-07	4.3932e-07	4.33292e-07	4.1769e-07	4.04736e-07	3.95258e-07	3.65229e-07	3.5748e-07
1044.14	8.536	1.22668e-07	7.11413e-08	1.02893e-07	1.24604e-07	1.20306e-07	1.32058e-07	1.20999e-07	1.05171e-07	1.03361e-07	9.63184e-08	9.69129e-08	9.68668e-08	1.00932e-07	9.6899e-08	9.20191e-08	8.54913e-08	6.85591e-08
1051.6	8.537	1.44538e-06	1.12907e-06	1.19368e-06	1.14305e-06	1.18576e-06	1.12414e-06	1.06414e-06	1.02121e-06	9.17987e-07	8.64754e-07	6.83786e-07	5.802e-07	4.43323e-07	2.15835e-07	-1.83369e-07	-6.20533e-07	-8.85785e-07
1059.06	8.538	1.05234e-07	9.82911e-08	8.53798e-08	1.18788e-07	9.87205e-08	9.33216e-08	1.00294e-07	9.88887e-08	1.06377e-07	8.71993e-08	9.61201e-08	8.25657e-08	9.00024e-08	7.64788e-08	8.30313e-08	7.14586e-08	6.45733e-08
1066.52	8.54	2.88005e-07	2.57203e-07	2.55277e-07	2.29109e-07	2.47623e-07	2.48314e-07	2.47136e-07	2.46491e-07	2.45801e-07	2.40557e-07	2.45309e-07	2.44578e-07	2.29463e-07	2.2203e-07	2.05833e-07	1.9769e-07	1.72684e-07
1073.98	8.541	4.46112e-08	2.39526e-08	6.36118e-09	2.3029e-08	3.98134e-08	2.79501e-08	3.52988e-08	2.91258e-08	1.94466e-08	3.08484e-08	3.79168e-08	2.29958e-08	3.90947e-08	3.55168e-08	2.29087e-08	2.23538e-08	1.30258e-08
1081.44	8.543	2.26319e-09	0	4.18908e-09	3.49076e-09	6.68105e-09	5.52462e-09	2.57493e-09	3.39109e-09	3.27658e-09	5.00047e-09	2.23388e-09	1.56531e-09	-5.00936e-09	1.95981e-10	4.06191e-09	5.30335e-25	1.05208e-08
1088.9	8.544	3.4291e-09	0	3.29077e-09	6.99339e-10	-3.11853e-10	8.21535e-10	2.02037e-09	1.75597e-09	2.13159e-09	-5.43579e-10	0	1.06581e-09	-2.42013e-09	-4.4239e-10	-1.4162e-25	3.19778e-09	-5.11421e-09
1096.36	8.545	1.03872e-09	0	1.99572e-09	2.0384e-09	2.33104e-09	4.14962e-10	8.50997e-10	0	0	1.88543e-09	0	2.95608e-09	-3.06181e-09	3.79191e-09	2.53701e-09	-1.40241e-08	0
1103.82	8.547	0	3.49154e-25	0	1.65855e-09	1.19724e-09	-1.97367e-10	1.24963e-09	0	0	0	2.96203e-09	0	0	0	0	0	0
1111.28	8.548	0	1.24498e-09	1.25309e-09	2.0021e-09	-4.54148e-11	0	1.37573e-09	0	0	0	2.02332e-09	0	0	0	9.8153e-09	7.53656e-09	0
1118.74	8.55	-2.31578e-10	0	8.32778e-10	2.94365e-09	-9.56034e-10	-2.29216e-09	0	2.9317e-25	2.24779e-09	3.83729e-09	-7.24212e-25	0	-7.18654e-10	0	4.88559e-09	1.48548e-08	-2.56933e-09
1126.2	8.551	0	0	0	0	0	0	0	0	0	3.54451e-09	0	1.52251e-09	0	2.03185e-09	0	0	0
1133.66	8.552	0	1.11872e-09	3.50499e-09	0	3.2229e-09	1.69968e-09	8.85043e-11	1.31713e-24	-1.88072e-10	3.46728e-09	-1.63503e-09	1.23015e-09	-5.06127e-10	3.78928e-09	0	-1.75455e-24	0
1141.11	8.554	0	0	0	0	0	0	0	0	-2.47484e-09	0	0	0	0	0	0	0	0
1148.57	8.555	0	1.67312e-09	0	0	8.61485e-10	0	0	0	0	0	0	3.8532e-09	0	0	0	4.44416e-09	0
1156.03	8.557	0	0	0	4.2227e-10	0	0	0	0	0	0	0	0	0	0	0	0	0
1163.49	8.558	0	0	0	0	0	-8.21452e-10	0	0	2.22899e-09	0	0	0	0	0	0	0	-1.46316e-08
1170.95	8.559	4.32118e-09	0	0	0	0	0	0	4.12137e-09	2.57503e-09	0	0	0	0	0	0	0	0
1178.4	8.561	0	0	0	0	0	0	0	0	0	0	0	0	0	0	0	0	0
1185.86	8.562	0	0	0	0	0	0	0	0	0	0	0	0	0	0	0	0	0
1193.32	8.564	0	0	2.70202e-09	-3.64985e-10	4.94206e-09	4.16065e-10	-1.27002e-09	0	0	0	0	0	-4.41711e-09	-2.93246e-09	0	0	0
1200.78	8.565	1.46204e-05	1.32141e-05	1.3161e-05	1.31079e-05	1.30381e-05	1.30036e-05	1.29359e-05	1.28309e-05	1.27366e-05	1.26467e-05	1.25043e-05	1.23961e-05	1.21275e-05	1.17557e-05	1.13998e-05	1.0503e-05	1.04557e-05
1208.23	8.566	3.39222e-05	3.09029e-05	3.07457e-05	3.05824e-05	3.04965e-05	3.03352e-05	3.01898e-05	2.9954e-05	2.97507e-05	2.94824e-05	2.91131e-05	2.8817e-05	2.80895e-05	2.71559e-05	2.6393e-05	2.40808e-05	2.35666e-05
1215.69	8.568	1.33735e-05	1.17114e-05	1.16492e-05	1.15703e-05	1.15048e-05	1.14147e-05	1.13746e-05	1.12202e-05	1.10739e-05	1.098e-05	1.07912e-05	1.06769e-05	1.04166e-05	1.0101e-05	9.87265e-06	8.54215e-06	8.28434e-06
1223.15	8.569	2.27967e-05	2.0451e-05	2.0352e-05	2.02502e-05	2.0161e-05	2.00611e-05	1.99756e-05	1.98104e-05	1.96219e-05	1.95032e-05	1.93087e-05	1.91859e-05	1.86652e-05	1.80073e-05	1.74635e-05	1.55818e-05	1.56904e-05
1230.6	8.571	2.67729e-06	2.26147e-06	2.23985e-06	2.2225e-06	2.20451e-06	2.17833e-06	2.15811e-06	2.12239e-06	2.0813e-06	2.04358e-06	1.97251e-06	1.93057e-06	1.89491e-06	1.81122e-06	1.79737e-06	1.40089e-06	1.39903e-06
1238.06	8.572	8.59258e-07	7.66752e-07	7.6275e-07	7.56791e-07	7.36139e-07	7.33181e-07	7.34452e-07	7.31171e-07	7.40187e-07	7.1319e-07	7.0572e-07	6.99769e-07	6.70718e-07	6.27449e-07	6.45485e-07	5.78851e-07	5.84775e-07
1245.52	8.573	6.04247e-08	5.28265e-08	4.41088e-08	4.79114e-08	4.11417e-08	4.946e-08	4.80337e-08	4.09596e-08	4.58307e-08	4.81872e-08	3.70326e-08	4.55313e-08	3.42589e-08	4.36409e-08	2.89553e-08	5.87837e-08	3.75903e-08
1252.97	8.575	2.33776e-07	2.04101e-07	1.96614e-07	1.95822e-07	2.10541e-07	1.81848e-07	1.89685e-07	1.82864e-07	2.04374e-07	1.94189e-07	1.80596e-07	2.0547e-07	1.80989e-07	1.68067e-07	1.7132e-07	1.05992e-07	2.20619e-07
1260.43	8.576	2.12388e-07	2.09414e-07	1.92271e-07	2.08139e-07	1.94038e-07	1.86392e-07	2.06562e-07	1.81222e-07	1.78173e-07	1.84932e-07	1.76093e-07	1.83988e-07	2.09443e-07	1.83819e-07	1.88033e-07	1.69712e-07	2.40905e-07
1267.88	8.578	1.49841e-07	1.50417e-07	1.5452e-07	1.41637e-07	1.17909e-07	1.38402e-07	1.44005e-07	1.51588e-07	1.52904e-07	1.21475e-07	1.28552e-07	1.39885e-07	1.41319e-07	1.31469e-07	1.26156e-07	1.10848e-07	9.67186e-08
1275.34	8.579	0	2.188e-09	5.14884e-09	0	0	6.94063e-10	-4.65522e-09	0	-3.12835e-09	3.7894e-09	1.11389e-08	1.40479e-08	2.65817e-09	-3.99816e-09	0	1.6268e-08	0
1282.79	8.58	5.40717e-08	2.91226e-08	2.70318e-08	3.65439e-08	4.01469e-08	3.66924e-08	3.01512e-08	2.48818e-08	3.64903e-08	2.9724e-08	3.6445e-08	2.44124e-08	3.43275e-08	3.59504e-08	1.59415e-08	4.41853e-08	4.13851e-08
1290.25	8.582	1.98191e-06	1.71772e-06	1.71379e-06	1.68414e-06	1.67496e-06	1.69734e-06	1.69025e-06	1.65533e-06	1.70195e-06	1.62445e-06	1.66844e-06	1.7181e-06	1.72389e-06	1.72975e-06	1.56423e-06	7.66334e-07	-4.11011e-07
1297.71	8.583	1.05697e-06	7.3602e-07	7.54101e-07	7.31064e-07	7.38769e-07	7.07243e-07	7.61768e-07	7.47203e-07	7.66033e-07	7.61327e-07	7.93598e-07	7.18123e-07	6.6149e-07	4.46904e-07	-1.87854e-07	-8.23499e-07	-1.1733e-06
1305.16	8.585	1.25829e-08	7.26103e-09	8.11784e-09	3.99339e-09	5.37248e-09	4.69325e-09	1.82407e-08	1.57264e-08	4.31504e-10	1.26009e-08	1.55837e-08	9.31524e-09	9.17425e-09	-6.99073e-10	-2.63014e-09	1.55831e-08	2.88327e-08
1312.61	8.586	4.87582e-06	4.372e-06	4.3555e-06	4.31081e-06	4.32978e-06	4.28959e-06	4.29055e-06	4.25858e-06	4.22074e-06	4.20891e-06	4.16565e-06	4.13005e-06	4.00362e-06	3.80258e-06	3.68795e-06	3.93093e-06	4.4297e-06
1320.07	8.587	5.85427e-06	5.51245e-06	5.50302e-06	5.51206e-06	5.48839e-06	5.48104e-06	5.44703e-06	5.4325e-06	5.41345e-06	5.38614e-06	5.35052e-06	5.28286e-06	5.12974e-06	5.04363e-06	5.11056e-06	5.5084e-06	6.22281e-06
1327.52	8.589	1.7264e-07	1.61976e-07	1.72737e-07	1.50679e-07	1.52945e-07	1.59701e-07	1.5263e-07	1.56903e-07	1.37289e-07	1.17967e-07	1.76511e-07	1.34376e-07	1.38785e-07	1.03998e-07	1.26563e-07	1.27099e-07	9.83293e-08
1334.98	8.59	1.7629e-06	1.82008e-06	1.85507e-06	1.8498e-06	1.8664e-06	1.83349e-06	1.82949e-06	1.7682e-06	1.83461e-06	1.76133e-06	1.77933e-06	1.80326e-06	1.80782e-06	1.80947e-06	1.96089e-06	2.09033e-06	2.10567e-06
1342.43	8.592	3.25117e-06	3.08494e-06	3.10749e-06	3.107e-06	3.09009e-06	3.10232e-06	3.09597e-06	3.10151e-06	3.0384e-06	3.04177e-06	3.01369e-06	2.97306e-06	3.01741e-06	2.95359e-06	2.97507e-06	3.00281e-06	3.0889e-06
1349.88	8.593	5.77227e-07	5.11726e-07	4.67718e-07	4.87927e-07	4.54085e-07	4.41754e-07	5.19786e-07	4.42631e-07	4.91069e-07	4.52204e-07	4.46974e-07	5.0281e-07	5.4046e-07	4.40206e-07	5.36311e-07	4.57608e-07	5.19166e-07
1357.34	8.594	3.75117e-08	6.8507e-08	6.28117e-08	7.53259e-08	6.13638e-08	7.37654e-08	6.81431e-08	7.07075e-08	5.99491e-08	7.68733e-08	7.25631e-08	9.11249e-08	7.26045e-08	5.93641e-08	6.92532e-08	7.85022e-08	7.51966e-08
1364.79	8.596	1.94664e-07	2.28824e-07	2.40303e-07	2.36149e-07	2.39988e-07	2.38759e-07	2.46123e-07	2.40942e-07	2.40642e-07	2.36955e-07	2.31638e-07	2.49535e-07	2.33565e-07	2.44077e-07	2.3127e-07	2.38796e-07	2.74103e-07
1372.24	8.597	6.90669e-07	7.69111e-07	7.44099e-07	7.34207e-07	7.5365e-07	8.09698e-07	8.37764e-07	7.73601e-07	8.65387e-07	7.54763e-07	7.76191e-07	7.46447e-07	7.96747e-07	7.90171e-07	8.31704e-07	8.85703e-07	9.03276e-07
1379.69	8.599	2.35459e-07	2.17852e-07	2.4015e-07	2.55362e-07	2.07193e-07	2.35206e-07	1.87525e-07	1.83421e-07	2.33255e-07	2.13095e-07	2.36258e-07	2.41296e-07	2.3316e-07	2.22868e-07	2.2362e-07	2.48215e-07	2.54426e-07
1387.14	8.6	2.9119e-08	5.00955e-08	1.90453e-08	1.74294e-08	4.25495e-08	1.2132e-08	1.29642e-08	9.73375e-09	1.43383e-08	1.36375e-08	2.48894e-08	1.11158e-08	2.91463e-08	2.51077e-08	2.34389e-08	1.98613e-08	3.07789e-08
1394.59	8.601	-3.24834e-09	2.14585e-08	-4.66004e-09	-6.9383e-09	-7.2892e-09	-7.15358e-09	-3.00675e-09	-2.31027e-09	3.82182e-09	1.06502e-09	-1.39754e-09	-6.18849e-09	-1.03696e-08	-3.05351e-09	2.102e-09	2.31229e-09	-1.71768e-08
1402.04	8.603	-3.02862e-10	5.29857e-09	1.21196e-09	1.81814e-09	1.89995e-09	3.96296e-09	3.98219e-09	6.14096e-09	7.86726e-09	2.46617e-09	2.79345e-10	7.20767e-09	-2.77669e-09	2.83359e-09	-5.88594e-10	-2.76529e-10	-4.44581e-09
1409.49	8.604	1.04959e-09	2.26288e-09	1.64332e-09	1.73623e-09	2.80938e-09	3.23288e-08	6.23573e-09	-4.29286e-09	3.64924e-08	-4.42951e-09	-4.84972e-09	-6.17463e-09	-1.95189e-09	4.16846e-09	-3.21769e-09	2.76187e-09	-5.14241e-10
1416.94	8.606	-2.84346e-10	8.25638e-09	-2.98483e-09	-1.33243e-09	-1.10063e-09	-1.72158e-09	-2.44912e-08	1.98493e-08	1.11537e-08	-1.46263e-09	1.50068e-09	-2.94108e-09	-9.06688e-10	-2.27835e-09	-2.36734e-08	-3.13342e-09	-1.4594e-09
1424.39	8.607	6.59986e-08	7.30253e-08	3.48321e-08	1.41338e-08	2.54402e-08	1.20693e-08	2.34425e-08	2.75804e-08	5.96212e-09	1.33164e-08	1.27699e-08	3.06295e-08	7.52113e-09	1.63355e-08	1.30357e-08	4.28358e-08	3.60001e-08
1431.84	8.608	0.000207612	0.000197074	0.000196592	0.000196068	0.000195607	0.000195101	0.000194626	0.000193499	0.000192488	0.000191333	0.000188946	0.000186399	0.000183211	0.000178067	0.000167818	0.000155467	0.000142707
1439.29	8.61	0.000252618	0.000212957	0.000211982	0.000210869	0.000209845	0.000208752	0.000207706	0.000205507	0.000203395	0.000201207	0.000196905	0.000192513	0.000187655	0.000179984	0.000166619	0.000152146	0.000138338
1446.74	8.611	6.36434e-05	5.21985e-05	5.19945e-05	5.17089e-05	5.14835e-05	5.12566e-05	5.10227e-05	5.06098e-05	5.01838e-05	4.97249e-05	4.90312e-05	4.83564e-05	4.73742e-05	4.60964e-05	4.40748e-05	4.21242e-05	4.10022e-05
1454.19	8.613	3.60849e-06	3.71077e-06	3.73495e-06	3.71319e-06	3.69127e-06	3.72424e-06	3.66642e-06	3.70202e-06	3.70571e-06	3.74402e-06	3.76257e-06	3.82534e-06	3.93857e-06	4.02722e-06	4.27334e-06	4.65094e-06	4.96992e-06
1461.64	8.614	3.40591e-07	2.28799e-07	2.44921e-07	2.31149e-07	2.42059e-07	2.38065e-07	2.21943e-07	2.51393e-07	2.30207e-07	2.21995e-07	2.23426e-07	2.53739e-07	1.95806e-07	2.17706e-07	1.86717e-07	1.47359e-07	2.19186e-07
1469.08	8.615	6.03883e-06	5.57642e-06	5.53751e-06	5.56493e-06	5.54663e-06	5.54933e-06	5.54991e-06	5.56964e-06	5.53396e-06	5.51588e-06	5.55741e-06	5.5032e-06	5.48818e-06	5.51889e-06	5.50403e-06	5.56531e-06	5.65535e-06
1476.53	8.617	1.08432e-05	1.11073e-05	1.10988e-05	1.10794e-05	1.11256e-05	1.11065e-05	1.11047e-05	1.11268e-05	1.11136e-05	1.11402e-05	1.11898e-05	1.12271e-05	1.1377e-05	1.16641e-05	1.22768e-05	1.28494e-05	1.36633e-05
1483.98	8.618	3.2485e-06	3.2003e-06	3.18177e-06	3.17686e-06	3.20009e-06	3.17843e-06	3.20193e-06	3.17967e-06	3.21378e-06	3.18626e-06	3.20239e-06	3.22176e-06	3.24238e-06	3.20273e-06	3.45555e-06	3.42748e-06	3.69679e-06
1491.43	8.62	1.61016e-06	1.37278e-06	1.36629e-06	1.31591e-06	1.3169e-06	1.25241e-06	1.25616e-06	1.24244e-06	1.11987e-06	1.0746e-06	9.86304e-07	9.54514e-07	9.06044e-07	7.17995e-07	6.70464e-07	4.0824e-07	2.12416e-07
1498.87	8.621	2.9439e-06	2.65594e-06	2.66109e-06	2.65395e-06	2.61023e-06	2.56983e-06	2.54049e-06	2.54561e-06	2.42117e-06	2.38721e-06	2.32904e-06	2.21236e-06	2.12335e-06	2.01724e-06	2.19494e-06	1.75364e-06	1.61512e-06
1506.32	8.622	6.72069e-08	7.72937e-08	5.83472e-08	7.23052e-08	6.81659e-08	7.9714e-08	6.30083e-08	7.8606e-08	8.19221e-08	9.26599e-08	6.5978e-08	5.90987e-08	7.30701e-08	5.74569e-08	7.35644e-08	6.51845e-08	8.49766e-08
1513.76	8.624	1.37624e-08	2.06005e-08	2.29922e-08	1.16381e-08	5.8331e-08	2.91218e-08	1.14583e-08	0	1.45083e-08	2.55999e-08	0	1.23564e-09	-6.04626e-09	6.17081e-09	3.96913e-08	-6.24158e-09	1.46504e-08
1521.21	8.625	6.14264e-07	4.80254e-07	4.93922e-07	4.60418e-07	4.78932e-07	4.75336e-07	4.60707e-07	4.51057e-07	4.11378e-07	3.9165e-07	4.34855e-07	3.87212e-07	4.68819e-07	3.14172e-07	9.64955e-08	-6.36066e-08	-1.84702e-07
1528.66	8.627	9.33159e-06	8.03469e-06	7.93202e-06	7.88642e-06	7.85053e-06	7.7414e-06	7.59375e-06	7.48533e-06	7.20388e-06	6.96675e-06	6.87754e-06	6.82284e-06	6.39081e-06	6.31704e-06	5.89265e-06	2.84717e-06	2.79659e-06
1536.1	8.628	3.92421e-05	3.62833e-05	3.60948e-05	3.59254e-05	3.57347e-05	3.5577e-05	3.54031e-05	3.51617e-05	3.48759e-05	3.4726e-05	3.45071e-05	3.46015e-05	3.35008e-05	3.20299e-05	3.10442e-05	2.59925e-05	2.74049e-05
1543.55	8.629	2.23774e-05	2.0517e-05	2.04182e-05	2.03086e-05	2.01951e-05	2.01029e-05	2.00156e-05	1.98675e-05	1.97251e-05	1.95673e-05	1.93553e-05	1.9244e-05	1.86786e-05	1.79317e-05	1.79613e-05	1.47489e-05	1.50184e-05
1550.99	8.631	4.60539e-07	3.94723e-07	3.93733e-07	3.62752e-07	4.12491e-07	3.64467e-07	3.85596e-07	3.81033e-07	3.8353e-07	3.54131e-07	3.57505e-07	4.05713e-07	3.28055e-07	3.0707e-07	4.09979e-07	1.62906e-07	2.79611e-07
1558.43	8.632	3.65191e-07	3.2478e-07	3.09024e-07	3.09802e-07	3.08425e-07	3.07202e-07	2.87532e-07	2.97552e-07	2.92301e-07	2.96839e-07	2.57521e-07	2.89257e-07	2.71844e-07	3.02634e-07	2.40384e-07	2.68639e-07	2.37112e-07
1565.88	8.634	2.65396e-05	2.36395e-05	2.33976e-05	2.3253e-05	2.30669e-05	2.28167e-05	2.26788e-05	2.23686e-05	2.22141e-05	2.21397e-05	2.19633e-05	2.17627e-05	2.09422e-05	1.96956e-05	1.86807e-05	1.62829e-05	1.89023e-05
1573.32	8.635	0.000218365	0.000232569	0.000231294	0.000230127	0.000228965	0.000227714	0.000226808	0.000224424	0.000222463	0.000220725	0.000217672	0.000215289	0.000209606	0.000201862	0.000190111	0.000166815	0.000155777
1580.76	8.636	0.000140038	0.000149116	0.000148292	0.0001475	0.000146736	0.000146056	0.00014534	0.000143934	0.000142637	0.000141459	0.00013914	0.000137359	0.000133802	0.00012864	0.000121264	0.00010572	9.9036e-05
1588.2	8.638	9.63351e-06	8.3923e-06	8.32933e-06	8.25186e-06	8.15345e-06	8.113e-06	8.03043e-06	7.90418e-06	7.8746e-06	7.7504e-06	7.6345e-06	7.54399e-06	7.15767e-06	6.72985e-06	6.63987e-06	5.02555e-06	5.20179e-06
1595.65	8.639	2.12617e-05	1.91845e-05	1.90887e-05	1.90718e-05	1.89345e-05	1.88682e-05	1.87209e-05	1.8662e-05	1.85706e-05	1.84802e-05	1.84876e-05	1.87334e-05	1.80372e-05	1.70301e-05	1.54319e-05	1.11724e-05	1.15486e-05
1603.09	8.641	0.000200777	0.000219642	0.000218525	0.000217372	0.000216316	0.000215162	0.000214258	0.00021217	0.000210341	0.000208755	0.000205563	0.000203122	0.000197669	0.000189028	0.00017763	0.000152881	0.000141483
1610.53	8.642	0.000159588	0.000172496	0.000171671	0.000170637	0.000169782	0.000169071	0.000168063	0.000166591	0.00016498	0.000164092	0.000161463	0.000159524	0.000155083	0.000147835	0.000139391	0.00011936	0.000112749
1617.97	8.643	3.08796e-05	2.75313e-05	2.71958e-05	2.70517e-05	2.68477e-05	2.66359e-05	2.63346e-05	2.6077e-05	2.57095e-05	2.53853e-05	2.4728e-05	2.43563e-05	2.35656e-05	2.28319e-05	2.45419e-05	1.872e-05	1.84475e-05
1625.41	8.645	3.84745e-06	3.10123e-06	3.04856e-06	2.8895e-06	2.69657e-06	2.69329e-06	2.36751e-06	2.31423e-06	1.8469e-06	1.95458e-06	2.03254e-06	1.93688e-06	1.75403e-06	1.4955e-06	4.65362e-07	-5.84775e-07	-8.56447e-07
1632.85	8.646	4.15903e-06	3.8881e-06	3.96037e-06	3.89506e-06	3.87873e-06	3.86184e-06	3.82478e-06	3.68337e-06	3.65708e-06	3.60442e-06	3.49774e-06	3.31814e-06	3.08541e-06	2.29072e-06	1.3621e-06	-6.45506e-07	-1.09369e-06
1640.29	8.648	3.10512e-05	2.8411e-05	2.82459e-05	2.80784e-05	2.78863e-05	2.77612e-05	2.75558e-05	2.72897e-05	2.7139e-05	2.69612e-05	2.6722e-05	2.68648e-05	2.61053e-05	2.51195e-05	2.44531e-05	1.92489e-05	2.11922e-05
1647.73	8.649	3.02394e-05	2.84134e-05	2.83044e-05	2.82168e-05	2.80765e-05	2.79538e-05	2.7857e-05	2.77014e-05	2.75479e-05	2.74987e-05	2.7487e-05	2.77809e-05	2.67924e-05	2.55182e-05	2.47268e-05	2.11311e-05	2.44253e-05
1655.17	8.65	1.01468e-05	8.94413e-06	8.87111e-06	8.78909e-06	8.80204e-06	8.66369e-06	8.81186e-06	8.72648e-06	8.72367e-06	8.63884e-06	8.67698e-06	8.84815e-06	8.49228e-06	7.89276e-06	8.54355e-06	7.82174e-06	9.72251e-06
1662.61	8.652	2.66507e-06	2.38966e-06	2.28995e-06	2.24931e-06	2.14319e-06	2.12283e-06	2.17087e-06	1.98442e-06	2.00216e-06	2.00567e-06	2.06355e-06	2.1052e-06	1.91066e-06	1.51313e-06	1.00797e-06	-2.1174e-08	-1.22514e-07
1670.05	8.653	1.24061e-06	1.05508e-06	1.07814e-06	1.05608e-06	1.04308e-06	1.06298e-06	1.02822e-06	1.03879e-06	1.0164e-06	1.00294e-06	1.01572e-06	1.06285e-06	9.64393e-07	8.9963e-07	9.91996e-07	7.39169e-07	8.98021e-07
1677.48	8.655	3.54151e-07	3.07496e-07	2.91532e-07	3.01554e-07	3.12066e-07	2.62886e-07	2.38094e-07	2.75384e-07	3.01186e-07	2.92062e-07	2.48374e-07	2.1821e-07	2.91667e-07	3.22717e-07	2.07445e-07	1.55266e-07	2.43503e-07
1684.92	8.656	1.63307e-07	1.42911e-07	1.37872e-07	1.51662e-07	1.48635e-07	1.82151e-07	1.57679e-07	7.80628e-08	9.94676e-08	1.47133e-07	1.24577e-07	8.09511e-08	9.66899e-08	7.6614e-08	1.4316e-07	1.0127e-07	1.24006e-07
1692.36	8.657	4.93305e-08	2.36313e-08	3.3857e-08	2.76099e-08	3.67343e-08	2.78297e-08	5.63746e-08	2.22741e-08	4.92271e-08	5.31487e-08	2.13577e-08	0	1.55396e-08	5.17377e-08	6.22368e-08	1.95208e-08	1.66342e-08
1699.8	8.659	0	1.94702e-08	1.02064e-08	4.29677e-09	1.42259e-08	1.369e-08	3.34769e-09	9.24079e-09	1.55165e-08	1.87631e-08	8.05368e-08	0	3.97994e-08	-1.93707e-08	1.92299e-08	-1.77164e-08	-8.17127e-09
1707.23	8.66	2.0163e-08	2.36345e-09	3.68815e-08	2.99583e-08	3.64925e-08	2.19709e-08	8.06476e-09	1.58166e-08	4.20713e-08	1.8254e-08	6.13391e-09	6.45406e-08	1.41564e-08	1.97784e-08	3.00438e-09	2.3612e-08	2.91868e-08
1714.67	8.662	1.20436e-08	1.2964e-08	-2.35405e-09	-7.64296e-09	1.6834e-08	2.21255e-08	0	-1.12444e-08	3.18633e-08	2.89039e-09	-3.56297e-09	2.72101e-08	1.32337e-09	8.2618e-24	1.69356e-08	-3.10095e-09	1.17548e-08
1722.1	8.663	1.72211e-08	5.31621e-09	1.398e-08	-3.59373e-09	4.25724e-08	2.0944e-08	6.07634e-09	1.15492e-08	3.43137e-08	-1.09334e-08	1.29649e-09	0	1.50115e-08	0	2.44437e-09	8.52947e-09	2.82929e-08
1729.54	8.664	0	4.17086e-09	6.71429e-09	-3.91433e-09	-2.09295e-09	0	0	0	0	1.53321e-09	4.71221e-09	-2.95168e-08	-8.87824e-09	0	1.55028e-08	2.02283e-08	1.72182e-09
1736.97	8.666	0	0	0	-1.60474e-09	0	0	0	0	0	0	-2.94768e-08	-1.86464e-08	0	0	1.0777e-08	6.57795e-09	6.72794e-09
1744.41	8.667	0	0	-3.91256e-09	-1.16181e-09	0	0	0	0	-2.32777e-08	0	0	0	0	0	8.06285e-09	-8.23946e-09	-5.36576e-09
1751.84	8.669	1.52968e-07	1.32753e-07	1.51717e-07	1.51986e-07	1.28757e-07	1.26782e-07	1.38505e-07	1.6116e-07	1.66385e-07	1.31984e-07	1.62885e-07	1.28021e-07	1.03675e-07	1.24614e-07	1.61587e-07	1.41075e-07	1.77367e-07
1759.27	8.67	2.36061e-07	1.92462e-07	1.9679e-07	1.80054e-07	2.18451e-07	1.90509e-07	1.87052e-07	1.72162e-07	2.62657e-07	1.0838e-07	1.51121e-07	2.81747e-07	1.67998e-07	2.84623e-07	2.15661e-07	1.93985e-07	2.02986e-07
1766.71	8.671	1.23578e-07	9.47927e-08	1.06861e-07	1.33485e-07	9.27469e-08	9.49066e-08	7.26965e-08	9.32585e-08	1.60184e-07	1.06299e-07	6.98309e-08	1.04352e-07	7.04413e-08	2.33988e-07	1.01009e-07	7.11456e-08	1.24905e-07
1774.14	8.673	9.26063e-09	5.35969e-08	2.57874e-08	3.75958e-24	5.39163e-08	5.56495e-08	8.15746e-09	0	3.60402e-08	2.1526e-08	1.06542e-08	0	3.37359e-08	4.50328e-08	2.04777e-08	2.39934e-08	3.8444e-08
1781.57	8.674	1.07297e-08	6.3017e-09	2.84336e-08	4.28266e-08	1.68946e-08	3.7299e-08	6.39648e-24	2.75033e-08	3.56311e-09	2.07125e-08	0	1.51652e-08	1.51991e-08	1.07689e-08	1.72669e-08	2.04355e-08	3.35842e-08
1789.01	8.676	2.79109e-07	2.38523e-07	2.77311e-07	1.94185e-07	2.4099e-07	2.54827e-07	2.53303e-07	2.77224e-07	2.48017e-07	2.56235e-07	2.68391e-07	1.63023e-07	1.23696e-07	2.92875e-07	2.33401e-07	2.66845e-07	3.06416e-07
1796.44	8.677	1.12161e-07	1.37778e-07	9.85513e-08	1.36096e-07	1.303e-07	1.90314e-07	1.62321e-07	1.69384e-07	1.54282e-07	8.68352e-08	1.19103e-07	1.63352e-07	1.03507e-07	1.59516e-07	1.83934e-07	2.23595e-07	2.10952e-07
1803.87	8.678	1.54387e-08	1.85641e-08	1.59479e-08	1.96489e-08	3.33704e-08	3.47923e-08	1.51118e-07	8.80218e-09	2.87209e-08	1.17354e-07	1.27112e-08	6.21605e-08	2.4199e-08	1.51627e-08	6.08215e-09	3.03874e-08	0
1811.3	8.68	5.27415e-11	3.3522e-08	1.00601e-08	5.92655e-09	5.67484e-10	1.48657e-08	-3.11949e-08	1.50437e-09	1.72193e-09	6.3955e-08	3.74374e-09	5.92161e-09	6.05887e-09	1.19019e-08	5.09448e-09	3.35445e-08	2.42116e-08
1818.73	8.681	1.50801e-08	-4.64868e-08	-3.9928e-08	-3.39658e-08	-3.41526e-08	-4.15563e-08	-2.68856e-08	-5.00317e-08	-3.99054e-08	-6.04221e-08	-5.36167e-08	-5.29747e-08	-6.99565e-08	-6.2767e-08	-5.21603e-08	-9.07058e-08	-8.54416e-08
1826.16	8.683	6.54217e-10	1.86407e-08	2.98231e-08	1.81615e-08	1.51912e-08	1.84556e-08	3.78564e-08	8.7077e-09	1.56826e-08	1.59827e-08	1.74283e-08	3.16153e-08	1.98796e-08	4.76694e-08	3.30152e-08	1.74189e-08	1.47301e-08
1833.59	8.684	7.64784e-08	1.2511e-07	1.23743e-07	1.25372e-07	1.25517e-07	1.2567e-07	1.25835e-07	1.26199e-07	1.10745e-07	1.27083e-07	8.58103e-08	1.32999e-07	1.34874e-07	1.38628e-07	1.1446e-07	1.26352e-07	1.16052e-07
1841.02	8.685	-6.91995e-09	-5.98787e-08	-5.99276e-08	-1.05321e-08	-1.05419e-08	-1.05522e-08	-1.05631e-08	-1.0587e-08	-1.06139e-08	-1.47083e-08	-1.48074e-08	-1.49318e-08	-1.09203e-08	-1.11473e-08	-1.17311e-08	-1.26832e-08	-1.36032e-08
1848.45	8.687	-2.17249e-08	-4.31983e-08	-4.32668e-08	-4.33396e-08	-4.34168e-08	-4.64396e-08	-4.65322e-08	-4.54648e-08	-4.56835e-08	-4.59273e-08	-4.65004e-08	-4.72053e-08	-1.55766e-08	-4.79172e-08	-5.19214e-08	-5.80171e-08	-6.37571e-08
1855.88	8.688	-5.80335e-08	-8.29702e-08	-9.10165e-08	-8.37242e-08	-8.3794e-08	-8.38691e-08	-8.39502e-08	-8.41293e-08	-8.51195e-08	-8.45697e-08	-8.51449e-08	-8.58879e-08	-8.68601e-08	-8.88299e-08	-9.40019e-08	-1.02522e-07	-1.10742e-07
1863.31	8.69	1.02962e-07	7.37623e-08	6.21715e-08	1.08986e-07	6.14373e-08	7.23255e-08	6.50842e-08	7.06787e-08	6.27964e-08	7.48777e-08	7.69074e-08	8.55777e-08	6.92846e-08	7.26348e-08	1.14139e-07	8.83693e-08	9.94429e-08
1870.73	8.691	1.263e-05	1.31864e-05	1.30896e-05	1.30828e-05	1.30975e-05	1.31416e-05	1.31731e-05	1.31005e-05	1.31127e-05	1.31526e-05	1.31968e-05	1.31793e-05	1.31914e-05	1.32864e-05	1.33667e-05	1.36745e-05	1.40069e-05
1878.16	8.692	5.15679e-05	3.93572e-05	3.92825e-05	3.91789e-05	3.91632e-05	3.90875e-05	3.90831e-05	3.8878e-05	3.87676e-05	3.85879e-05	3.82865e-05	3.79415e-05	3.76518e-05	3.70251e-05	3.59388e-05	3.47609e-05	3.39922e-05
1885.59	8.694	3.51303e-05	2.91288e-05	2.91086e-05	2.90517e-05	2.90429e-05	2.89376e-05	2.89267e-05	2.88757e-05	2.87685e-05	2.86521e-05	2.84079e-05	2.82005e-05	2.7919e-05	2.74926e-05	2.66395e-05	2.57168e-05	2.50018e-05
1893.01	8.695	6.83458e-06	1.10878e-05	1.11191e-05	1.11471e-05	1.11727e-05	1.12298e-05	1.12631e-05	1.1258e-05	1.13302e-05	1.14244e-05	1.16051e-05	1.18044e-05	1.21261e-05	1.25729e-05	1.3711e-05	1.54222e-05	1.71426e-05
1900.44	8.697	2.89706e-06	4.06666e-06	4.054e-06	4.03959e-06	4.15983e-06	4.09852e-06	4.12845e-06	4.08708e-06	4.1194e-06	4.12065e-06	4.15635e-06	4.25444e-06	4.27301e-06	4.40241e-06	4.63427e-06	4.92256e-06	5.37789e-06
1907.86	8.698	2.46125e-06	4.23039e-06	4.17342e-06	4.19732e-06	4.23842e-06	4.21739e-06	4.22077e-06	4.26169e-06	4.28314e-06	4.20779e-06	4.35257e-06	4.45485e-06	4.46872e-06	4.65322e-06	5.08307e-06	5.72404e-06	6.11321e-06
1915.29	8.699	5.40394e-07	7.45007e-07	7.40216e-07	7.12003e-07	7.72879e-07	7.07703e-07	7.16344e-07	7.1797e-07	7.37827e-07	6.81325e-07	7.73953e-07	6.81998e-07	7.80581e-07	7.2623e-07	8.87218e-07	8.04916e-07	9.5288e-07
1922.71	8.701	5.65122e-07	6.60726e-07	6.18995e-07	6.25811e-07	6.0816e-07	6.32496e-07	6.16561e-07	6.42015e-07	6.30071e-07	6.25569e-07	6.55497e-07	6.10588e-07	6.54595e-07	6.74927e-07	6.93322e-07	7.48937e-07	9.167e-07
1930.14	8.702	4.92806e-07	7.74075e-07	7.89463e-07	8.73776e-07	8.04281e-07	8.04463e-07	7.7185e-07	8.04867e-07	8.05176e-07	8.67846e-07	8.44345e-07	8.50511e-07	9.09323e-07	8.47121e-07	8.82463e-07	1.16159e-06	1.204e-06
1937.56	8.704	2.20892e-05	1.75278e-05	1.74324e-05	1.74162e-05	1.73126e-05	1.74466e-05	1.72214e-05	1.72171e-05	1.7034e-05	1.70141e-05	1.68999e-05	1.67399e-05	1.65546e-05	1.64086e-05	1.60938e-05	1.63304e-05	1.66856e-05
1944.98	8.705	0.000395598	0.000315654	0.000313891	0.000312228	0.000310442	0.000308806	0.000307067	0.000303543	0.000300049	0.000296557	0.000289444	0.00028225	0.000274053	0.000261277	0.000237951	0.000212139	0.000187517
1952.41	8.706	0.00115986	0.000951957	0.000946568	0.000941339	0.000936021	0.000930638	0.000925178	0.000914181	0.00090308	0.000891687	0.000868411	0.000844429	0.000819723	0.000779593	0.000701463	0.000620231	0.000539761
1959.83	8.708	0.00112811	0.000948724	0.000944359	0.000940015	0.000935621	0.000931266	0.000926715	0.00091768	0.00090852	0.00089921	0.000880224	0.000860474	0.000838871	0.000803663	0.000734298	0.000657899	0.000581996
1967.25	8.709	0.001	0.00086503	0.000860742	0.000856506	0.000852049	0.000847872	0.000843476	0.000834623	0.000825911	0.000817208	0.000799723	0.000781947	0.000763448	0.000734599	0.000680708	0.000624787	0.000567548
1974.67	8.711	0.000301424	0.000295056	0.000293483	0.000292074	0.000290552	0.000289165	0.000287645	0.00028475	0.000281842	0.00027898	0.000273029	0.00026716	0.000259782	0.000247796	0.000224112	0.000195134	0.000165645
1982.09	8.712	6.94814e-05	6.26938e-05	6.22543e-05	6.19315e-05	6.1775e-05	6.12689e-05	6.11305e-05	6.02986e-05	5.99746e-05	5.95873e-05	5.87672e-05	5.82351e-05	5.70835e-05	5.49406e-05	5.27476e-05	4.48751e-05	4.46082e-05
1989.52	8.714	4.46045e-05	4.14972e-05	4.14977e-05	4.12129e-05	4.12012e-05	4.11919e-05	4.12085e-05	4.11274e-05	4.12485e-05	4.14428e-05	4.20043e-05	4.31623e-05	4.23435e-05	4.15371e-05	4.20798e-05	3.99643e-05	4.63909e-05
1996.94	8.715	0.000582637	0.000534659	0.000532891	0.000530978	0.000529124	0.000527437	0.000525707	0.000522174	0.000518503	0.000514803	0.000507354	0.000499749	0.000491635	0.00047835	0.000449695	0.000417979	0.000385189
2004.35	8.716	0.00359186	0.00263462	0.00261804	0.00260123	0.00258442	0.00256736	0.00255019	0.00251542	0.00247997	0.00244393	0.00236948	0.00229183	0.00221388	0.00208743	0.0018415	0.00159101	0.00136994
2011.77	8.718	0.00278576	0.00225129	0.0022387	0.00222597	0.00221311	0.0022002	0.00218709	0.00216058	0.00213353	0.00210581	0.00204832	0.00198745	0.00192939	0.00183407	0.00164052	0.00145106	0.00125655
2019.19	8.719	0.00169568	0.00142349	0.00141616	0.00140888	0.0014015	0.00139409	0.0013866	0.00137148	0.00135629	0.00134074	0.00130866	0.00127526	0.00124284	0.00118948	0.00108236	0.000976754	0.000860112
2026.61	8.721	0.00059552	0.000552947	0.000549616	0.000546607	0.000543514	0.000540466	0.000537355	0.000531175	0.000525175	0.000519028	0.000506714	0.000494044	0.000481094	0.000460833	0.000420238	0.000373549	0.000325907
2034.03	8.722	0.000288371	0.000262252	0.000260491	0.000258883	0.000257295	0.000255798	0.000254364	0.000251609	0.00024897	0.000246673	0.000243027	0.000240479	0.000233302	0.000224216	0.000213983	0.000180511	0.000184561
2041.45	8.723	0.000312467	0.000307883	0.00030666	0.000304984	0.000303805	0.00030241	0.000300908	0.000298542	0.000296231	0.000294184	0.000290853	0.000289604	0.000283473	0.000274077	0.000259008	0.000224297	0.000216427
2048.86	8.725	0.000646014	0.000635593	0.000632549	0.000629183	0.000626193	0.000623231	0.00062012	0.00061363	0.00060674	0.000599638	0.000585919	0.000570907	0.000557031	0.000534071	0.00048625	0.000433745	0.000380964
2056.28	8.726	0.000993025	0.00090811	0.000903665	0.000899359	0.000894873	0.000890961	0.0008865	0.000877516	0.000868858	0.000859706	0.000840994	0.000821137	0.00080322	0.000774571	0.00071601	0.000660949	0.000601301
2063.7	8.727	0.000786979	0.000735167	0.000731505	0.000727942	0.000724211	0.00072042	0.000716884	0.000709318	0.000701657	0.000693953	0.000678211	0.000661528	0.000646352	0.000620896	0.000570124	0.000518372	0.000463871
2071.11	8.729	0.000712078	0.000672005	0.000668355	0.000664597	0.000661027	0.000657414	0.000653717	0.000646436	0.000639058	0.000631344	0.000615616	0.00059947	0.000584545	0.000560795	0.00051135	0.000457268	0.000402209
2078.53	8.73	0.000389374	0.000375524	0.000373472	0.000371452	0.000369477	0.000367581	0.000365536	0.000362094	0.000358797	0.000355451	0.000349559	0.000344484	0.000335554	0.000321673	0.00030024	0.000259618	0.000242692
2085.94	8.732	0.000308386	0.000290497	0.000288808	0.000287028	0.000285267	0.000283539	0.000282002	0.000278732	0.000276241	0.000273211	0.000268788	0.000265617	0.000257052	0.000244889	0.000227377	0.000191793	0.00018685
2093.36	8.733	0.000149921	0.000134956	0.000133858	0.00013298	0.000131968	0.000131092	0.000130097	0.00012845	0.000126964	0.000125632	0.000123712	0.00012294	0.000118139	0.000112224	0.000108851	7.90738e-05	9.06612e-05
2100.77	8.734	5.95461e-05	5.50607e-05	5.47015e-05	5.45092e-05	5.42638e-05	5.38402e-05	5.37498e-05	5.31623e-05	5.34533e-05	5.3567e-05	5.4296e-05	5.46313e-05	5.28359e-05	5.12655e-05	4.91742e-05	3.2711e-05	4.84467e-05
2108.18	8.736	2.66511e-05	2.39004e-05	2.37889e-05	2.37127e-05	2.37321e-05	2.35873e-05	2.34292e-05	2.33792e-05	2.34272e-05	2.33889e-05	2.38637e-05	2.45251e-05	2.43684e-05	2.36674e-05	1.78546e-05	1.0641e-05	2.70006e-05
2115.59	8.737	2.2186e-05	1.90326e-05	1.89819e-05	1.84869e-05	1.8488e-05	1.78268e-05	1.76761e-05	1.75856e-05	1.71203e-05	1.62554e-05	1.5622e-05	1.5526e-05	1.42386e-05	1.25073e-05	8.90859e-06	-1.80216e-06	-1.03854e-05
2123.01	8.739	4.56781e-06	3.77771e-06	3.63923e-06	3.66862e-06	3.55715e-06	3.43071e-06	3.39663e-06	3.11246e-06	2.89259e-06	2.92059e-06	2.76056e-06	2.56108e-06	2.44776e-06	2.47449e-06	3.81099e-06	2.31899e-06	3.78324e-06
2130.42	8.74	2.3758e-06	2.0348e-06	2.00329e-06	1.81454e-06	1.88496e-06	1.62467e-06	1.5967e-06	1.49586e-06	1.50998e-06	1.50316e-06	1.42366e-06	1.35738e-06	1.14562e-06	8.07297e-07	3.29635e-07	-2.14483e-06	-1.99613e-06
2137.83	8.741	1.72973e-06	1.48644e-06	1.44967e-06	1.37768e-06	1.35989e-06	1.23116e-06	1.32976e-06	1.14824e-06	9.26295e-07	1.0054e-06	3.42121e-07	2.817e-07	3.76724e-08	-4.2984e-07	-1.32742e-06	-4.08446e-06	-5.27191e-06
2145.24	8.743	9.10192e-06	7.57768e-06	7.85181e-06	7.28064e-06	7.52004e-06	6.95774e-06	7.28714e-06	7.07322e-06	6.67345e-06	6.36121e-06	5.94622e-06	5.89509e-06	5.71493e-06	6.51067e-06	1.09748e-05	1.50192e-05	2.88619e-05
2152.65	8.744	1.48621e-05	1.34693e-05	1.32181e-05	1.29248e-05	1.29557e-05	1.27942e-05	1.23963e-05	1.20942e-05	1.18533e-05	1.14788e-05	1.11664e-05	1.07201e-05	1.10427e-05	1.21254e-05	1.66814e-05	1.11359e-05	1.22153e-05
2160.06	8.746	1.26957e-05	1.08807e-05	1.03835e-05	1.03255e-05	1.02894e-05	1.02115e-05	9.54265e-06	9.28561e-06	8.99808e-06	8.7866e-06	8.09971e-06	7.64027e-06	6.70498e-06	5.24153e-06	2.71459e-06	5.17853e-06	1.7532e-05
2167.47	8.747	9.28504e-06	8.54372e-06	8.44624e-06	8.40305e-06	8.11824e-06	7.98624e-06	7.99341e-06	7.69835e-06	7.55084e-06	7.34481e-06	7.19861e-06	7.21942e-06	6.60729e-06	5.60663e-06	3.72756e-06	1.46905e-06	6.61501e-06
2174.88	8.748	3.29879e-06	2.53059e-06	2.42495e-06	2.6555e-06	2.56348e-06	2.6584e-06	2.59906e-06	2.6223e-06	2.52772e-06	2.33459e-06	2.10057e-06	1.86188e-06	1.37219e-06	-8.78371e-08	-2.07693e-06	-5.63176e-06	-9.06405e-06
2182.28	8.75	6.65526e-07	4.91287e-07	3.26052e-07	4.64601e-07	6.92569e-07	5.61461e-07	5.47703e-07	4.89101e-07	4.24948e-07	2.76717e-07	4.26592e-07	3.82429e-07	3.40551e-07	2.35943e-07	1.13919e-07	-3.54821e-07	-6.04787e-07
2189.69	8.751	9.39157e-07	9.45775e-07	9.61121e-07	8.92396e-07	6.9668e-07	8.28568e-07	8.91835e-07	8.65507e-07	8.09461e-07	7.60369e-07	8.01236e-07	8.39431e-07	8.00354e-07	7.85198e-07	8.53838e-07	4.7398e-07	9.08038e-07
2197.1	8.753	3.10117e-07	2.64223e-07	2.81403e-07	2.41013e-07	4.41364e-07	2.181e-07	2.53063e-07	5.64814e-07	5.88324e-07	2.48089e-07	2.60002e-07	2.74383e-07	2.1273e-07	2.11398e-07	2.96609e-07	1.79296e-07	3.14207e-07
2204.5	8.754	1.2919e-07	3.12139e-08	7.46601e-08	8.49819e-08	8.24465e-08	7.19382e-08	3.64747e-08	2.15577e-07	4.07521e-09	1.48291e-08	7.36189e-08	5.67661e-08	5.93469e-08	6.38494e-08	8.34449e-08	1.29415e-08	8.87205e-08
2211.91	8.755	3.46844e-07	4.04517e-07	2.8247e-07	2.99224e-07	2.17963e-07	2.86942e-07	3.69183e-07	5.16902e-07	2.16378e-07	2.33572e-07	3.03459e-07	3.07109e-07	2.88198e-07	2.74222e-07	3.53306e-07	2.54682e-07	4.7974e-07
2219.31	8.757	1.87273e-07	2.5627e-07	1.37521e-07	4.37177e-08	2.27797e-07	1.96982e-07	1.97351e-07	2.10582e-07	1.63028e-07	3.98188e-07	1.26568e-07	1.52294e-07	1.13121e-07	1.20487e-07	1.68717e-07	1.2247e-07	2.27204e-07
2226.72	8.758	2.00012e-07	2.46728e-07	3.08942e-07	1.68869e-07	1.97143e-07	9.20679e-08	3.07675e-07	1.19319e-07	1.32291e-07	2.15237e-07	1.62173e-07	1.6408e-07	1.67262e-07	9.50583e-08	1.63864e-07	4.76768e-08	9.25248e-08
2234.12	8.76	2.61062e-08	1.63007e-07	1.63097e-07	1.25057e-07	6.30584e-08	4.92568e-08	0	6.73718e-08	0	3.89588e-09	6.90165e-08	4.77029e-08	3.93273e-08	2.93092e-08	1.33074e-08	4.13568e-08	9.74106e-09
2241.53	8.761	9.48288e-08	0	1.01407e-08	0	6.05318e-08	4.83052e-08	0	6.82893e-08	0	4.19897e-08	1.38049e-08	1.32072e-08	3.79886e-08	3.67284e-08	2.63347e-08	-2.49014e-08	9.1696e-08
2248.93	8.763	1.40741e-07	6.22776e-08	6.65781e-08	7.2438e-08	1.1925e-07	1.76209e-07	9.63275e-08	6.17527e-08	2.23182e-07	1.81256e-07	1.01349e-07	1.26994e-07	9.34097e-08	9.40199e-08	1.57402e-07	9.47225e-08	8.01629e-08
2256.33	8.764	2.09383e-07	1.46238e-07	1.11656e-07	2.8771e-07	2.04105e-07	1.05663e-07	8.64509e-08	2.56462e-07	1.29241e-07	1.60494e-07	1.652e-07	1.60011e-07	1.74194e-07	1.49547e-07	1.43777e-07	9.37672e-08	2.47901e-08
2263.73	8.765	1.33703e-08	1.47575e-07	0	4.50614e-08	9.96386e-08	1.33796e-07	6.53677e-08	1.56906e-08	3.87855e-08	4.984e-08	5.90591e-08	2.70086e-08	6.92158e-08	5.27686e-08	5.81055e-08	2.09233e-08	4.28597e-08
2271.14	8.767	2.37295e-08	0	5.97623e-08	3.45853e-09	2.2366e-08	4.71546e-09	9.62051e-08	8.93535e-08	5.67922e-08	3.70521e-08	1.99928e-08	7.16196e-08	3.72669e-08	3.01533e-08	1.98792e-08	2.92704e-08	1.03594e-07
2278.54	8.768	7.28746e-08	2.05847e-24	1.65732e-07	1.18704e-08	1.22234e-08	9.92941e-08	1.3845e-08	8.27182e-08	4.13329e-08	4.31552e-08	5.13157e-08	5.56622e-08	2.24819e-08	6.83672e-08	8.67857e-08	-5.77761e-08	-1.31259e-08
2285.94	8.77	1.84509e-08	0	0	4.71841e-09	3.8815e-09	3.15692e-09	5.10833e-09	0	4.73813e-08	2.27069e-08	3.92636e-09	3.14576e-08	4.44938e-09	2.39728e-09	4.23926e-08	2.66445e-08	7.01819e-09
2293.34	8.771	0	0	0	0	6.1577e-09	1.4046e-08	0	1.00529e-08	1.1366e-08	1.04847e-08	0	2.3209e-08	-6.07971e-09	1.92748e-08	2.57479e-08	4.277e-08	8.64823e-08
2300.74	8.772	2.59998e-08	0	0	0	0	-8.58361e-09	3.46989e-09	4.86901e-09	1.2119e-08	5.17653e-09	1.47376e-08	4.26151e-09	-2.48209e-09	0	0	0	-2.52011e-09
2308.14	8.774	1.62994e-08	2.72007e-08	0	3.84404e-09	-3.3963e-08	0	0	0	2.22332e-08	9.94531e-09	-2.3916e-09	-3.33197e-09	-1.26516e-08	-2.0565e-08	4.47785e-09	-8.65939e-09	5.03461e-08
2315.53	8.775	0	0	0	0	-4.26228e-25	2.79614e-08	0	3.65703e-08	0	1.25535e-08	2.96689e-09	1.20155e-08	2.5669e-08	2.56241e-08	1.6313e-08	8.53518e-08	6.67595e-08
2322.93	8.777	0	6.61035e-09	0	0	2.12341e-08	3.85486e-08	0	0	7.86758e-09	8.71163e-09	1.00335e-09	0	-5.63312e-09	2.5015e-08	0	9.19832e-08	-3.05701e-08
2330.33	8.778	0	0	0	0	0	0	0	0	8.46339e-09	6.73858e-25	0	1.3317e-24	-1.39515e-08	-2.78658e-08	0	0	-1.65093e-08
2337.73	8.779	0	0	0	0	0	6.78864e-09	0	0	7.86955e-10	0	0	5.12224e-09	2.15105e-08	-2.89601e-08	-3.09805e-08	0	7.23527e-09
2345.12	8.781	0	0	0	0	-5.87978e-09	1.1983e-08	0	7.71629e-09	-2.70732e-09	0	0	0	0	0	0	-6.81997e-08	7.84259e-09
2352.52	8.782	0	0	0	0	0	0	0	3.63387e-09	-6.48472e-09	0	0	0	0	8.52893e-09	0	0	0
2359.91	8.783	0	0	0	0	3.76357e-09	0	0	-1.17268e-08	-4.99124e-09	0	0	0	1.86913e-24	0	0	-8.63023e-08	1.101e-08
2367.31	8.785	0	0	0	7.97491e-09	2.23294e-09	0	0	8.48823e-09	0	0	9.87242e-09	0	2.46408e-08	0	1.11402e-23	5.0505e-08	-1.22261e-08
2374.7	8.786	0	-3.85689e-09	3.96415e-09	4.51647e-09	0	0	0	0	0	1.23842e-08	0	0	0	0	0	0	4.38724e-09
2382.09	8.788	0	0	0	0	0	3.92243e-09	0	1.21397e-09	1.2862e-08	0	2.0471e-09	0	-2.16479e-08	0	9.01627e-24	0	-5.86388e-09
2389.49	8.789	0	0	0	2.00651e-24	0	5.16489e-09	-1.4596e-09	8.03012e-09	6.87838e-09	3.03013e-09	0	-1.2903e-24	8.17278e-09	-2.37492e-08	-3.67544e-08	-1.75757e-08	-7.06816e-09
2396.88	8.79	0	0	0	9.31728e-25	0	1.72465e-09	1.08897e-09	5.34169e-09	0	0	0	-4.74346e-24	1.20982e-08	9.93025e-09	0	-2.12776e-24	1.18129e-08
2404.27	8.792	0	0	0	7.69292e-09	0	7.7246e-09	1.46022e-08	0	0	-5.12798e-09	0	-2.62927e-09	1.57368e-08	0	-9.81893e-09	0	2.29929e-08
2411.66	8.793	0	5.49147e-24	6.35143e-09	0	1.03812e-08	5.8905e-09	0	0	0	6.56603e-09	1.20899e-08	-3.55486e-09	0	-6.77216e-09	2.50658e-08	-1.85906e-08	1.99493e-08
2419.05	8.795	0	1.59613e-08	6.36511e-09	-2.80197e-09	5.00131e-09	5.78364e-09	0	1.22643e-08	-1.97308e-09	5.6513e-09	2.90515e-09	0	1.23483e-08	5.98795e-09	-4.65495e-08	5.34217e-09	3.07041e-08
2426.44	8.796	0	-3.49542e-08	1.20607e-08	-2.64443e-09	2.08659e-08	1.36983e-08	0	0	1.11839e-08	1.42349e-08	-6.69786e-09	0	1.32275e-08	1.12881e-08	0	1.08035e-23	1.04829e-10
2433.83	8.797	0	0	0	0	1.27638e-08	0	2.83624e-24	-4.3154e-09	2.06696e-08	-1.23922e-24	0	0	3.77312e-08	0	0	-1.09749e-08	-8.88215e-09
2441.22	8.799	2.65577e-08	5.1649e-08	8.62063e-09	2.21461e-24	3.08171e-08	1.77363e-08	1.52321e-08	-3.91192e-09	3.24597e-09	-3.45638e-09	4.35259e-09	4.08087e-09	9.9438e-09	0	2.77033e-08	0	-2.54974e-08
2448.61	8.8	0	4.97704e-09	6.65118e-09	0	0	1.77158e-09	9.70242e-09	9.92279e-09	0	1.82909e-09	0	7.24379e-09	0	0	8.5339e-09	4.10475e-09	-2.06852e-08
2455.99	8.802	0	7.55944e-25	7.60069e-09	1.83411e-08	0	1.37187e-08	1.41069e-08	1.29112e-08	0	2.13545e-08	7.48008e-09	7.78015e-09	0	0	9.26502e-09	-9.84421e-10	1.98926e-08
2463.38	8.803	3.43e-08	1.9013e-08	1.77357e-08	6.77864e-09	2.82491e-08	2.5067e-08	3.86188e-08	1.62885e-08	4.48718e-08	2.02843e-08	2.54001e-08	8.90971e-09	3.39645e-08	2.17866e-08	3.19883e-08	8.8041e-08	3.56197e-08
2470.77	8.804	4.08521e-08	1.4003e-07	7.1682e-08	2.99727e-08	6.85635e-08	1.06792e-07	5.35315e-08	6.7391e-08	6.94688e-08	4.20043e-08	3.55477e-08	3.79927e-08	9.15967e-08	8.74815e-08	1.53042e-08	2.80122e-08	3.56357e-08
2478.15	8.806	1.79077e-07	2.13702e-07	1.77387e-07	1.83383e-07	2.00053e-07	1.76326e-07	2.09262e-07	1.93165e-07	1.86014e-07	1.93805e-07	1.6546e-07	1.73913e-07	1.91142e-07	1.62495e-07	1.41853e-07	1.61462e-07	1.92747e-07
2485.54	8.807	5.30642e-06	5.29984e-06	5.34904e-06	5.32411e-06	5.39484e-06	5.32376e-06	5.30233e-06	5.32781e-06	5.47276e-06	5.62109e-06	5.55203e-06	5.73805e-06	5.60194e-06	5.87446e-06	6.96287e-06	8.90967e-06	1.17081e-05
2492.92	8.809	2.17271e-06	2.07078e-06	2.042e-06	2.0184e-06	2.04606e-06	2.05922e-06	2.0327e-06	2.03876e-06	2.07808e-06	2.08371e-06	2.05229e-06	2.08618e-06	2.12052e-06	2.15675e-06	2.30529e-06	2.83503e-06	3.50812e-06

## Sheet: k_PRISMA
Wavelength	FWHM	k_Summer_L	k_Summer_M	k_Summer_H	k_Winter_L	k_Winter_M	k_Winter_H	k_1976_L	k_1976_M	k_1976_H
943.093	11.1634	6.05987e-09	6.23784e-10	-6.00904e-10	5.62934e-10	2.0535e-10	1.50781e-09	1.76981e-09	-5.39644e-10	2.61766e-09	1.56262e-11	-1.60902e-09	1.2938e-09	2.64705e-09	-1.3275e-09	-3.4044e-09	-3.80246e-10	0
951.123	11.2245	0	0	-7.89066e-10	3.73918e-10	-1.0667e-09	5.05442e-10	0	-6.16038e-10	2.79781e-10	-1.48961e-09	-6.40265e-10	0	9.32119e-10	0	-5.0939e-10	0	0
959.679	12.4243	0	0	0	0	0	0	0	0	0	0	0	0	0	0	0	0	0
969.494	12.4752	0	0	0	0	0	0	0	0	0	0	0	0	0	0	0	0	0
978.688	12.2031	0	0	0	0	0	0	0	0	0	0	0	0	0	0	0	0	0
988.394	12.4208	0	0	0	0	0	0	0	0	0	0	0	0	0	0	0	0	0
998.492	13.0605	0	0	0	0	0	0	0	0	0	0	0	0	0	0	0	0	0
1008.29	12.7977	0	0	0	0	0	0	0	0	0	0	0	0	0	0	0	0	0
1018.18	13.3457	0	0	0	0	0	0	0	0	0	0	0	0	0	0	0	0	0
1028.97	13.3271	0	0	0	0	0	0	0	0	0	0	0	0	0	0	0	8.63344e-10	0
1038.22	13.3406	4.24579e-07	3.40559e-07	3.60486e-07	3.60997e-07	3.8748e-07	3.76864e-07	3.89759e-07	3.58959e-07	3.48716e-07	3.47645e-07	3.46258e-07	3.42502e-07	3.32172e-07	3.2566e-07	3.12541e-07	2.91602e-07	2.77683e-07
1047.9	13.6246	8.46139e-07	6.2863e-07	6.9502e-07	6.51446e-07	6.72213e-07	6.61462e-07	6.14865e-07	5.89612e-07	5.32833e-07	5.02378e-07	4.02871e-07	3.47509e-07	2.62511e-07	1.19143e-07	-1.29289e-07	-3.97185e-07	-5.50143e-07
1057.87	13.8052	4.54886e-07	4.02166e-07	4.11305e-07	4.0157e-07	4.11838e-07	3.72993e-07	3.72015e-07	3.56678e-07	3.34848e-07	3.10727e-07	2.78424e-07	2.41732e-07	2.32232e-07	1.98507e-07	1.43648e-07	6.63334e-08	2.0629e-08
1068.11	14.0138	1.98688e-07	1.73134e-07	1.62002e-07	1.46488e-07	1.70274e-07	1.65953e-07	1.6732e-07	1.66037e-07	1.59577e-07	1.60929e-07	1.69016e-07	1.623e-07	1.62266e-07	1.55198e-07	1.40244e-07	1.28756e-07	1.05723e-07
1078.56	14.1443	2.02559e-08	9.96969e-09	5.29006e-09	1.36609e-08	1.99322e-08	1.47377e-08	1.47445e-08	1.23098e-08	1.06517e-08	1.28832e-08	1.55233e-08	9.88175e-09	1.15644e-08	1.21756e-08	1.12444e-08	1.07418e-08	1.70457e-08
1089.09	14.237	2.38254e-09	0	2.67909e-09	1.6643e-09	5.52902e-10	8.15285e-10	1.56933e-09	1.09102e-09	1.71788e-09	1.02564e-09	-3.51322e-10	1.66774e-10	-3.08343e-09	4.00087e-10	-6.39811e-11	1.97628e-09	-4.70581e-09
1099.62	14.2462	5.43465e-10	2.46971e-25	1.07418e-09	2.24282e-09	1.7414e-09	1.03245e-10	1.07939e-09	0	0	9.21663e-10	2.04365e-09	1.60412e-09	-1.72406e-09	1.86969e-09	1.234e-09	-8.66646e-09	0
1110.27	14.509	6.85341e-11	7.35579e-10	9.84119e-10	1.5216e-09	-1.05265e-10	-9.63306e-10	8.13036e-10	0	0	1.48277e-09	1.21913e-09	0	0	0	6.41949e-09	1.08724e-08	-1.50683e-09
1121.01	14.2789	-2.04844e-10	0	4.78956e-10	2.09971e-09	-1.33882e-11	-1.36572e-09	0	1.92375e-25	1.32989e-09	2.30741e-09	-3.76954e-25	0	-4.14076e-10	0	3.93775e-09	1.1561e-08	-1.43346e-09
1131.68	14.4797	0	9.28755e-10	1.99031e-09	0	2.40793e-09	9.84613e-10	1.22311e-10	7.25736e-25	-9.38694e-11	3.25351e-09	-8.55101e-10	1.24872e-09	1.74489e-10	3.13753e-09	0	-1.47745e-24	0
1142.36	14.3065	0	0	6.10986e-10	0	6.95234e-11	0	0	0	-2.02276e-09	0	-2.18857e-11	0	0	0	0	-1.91031e-24	0
1153	14.5513	0	1.01701e-09	0	2.67595e-10	5.4169e-10	0	0	0	0	0	0	2.62876e-09	0	0	0	2.8525e-09	0
1164.03	14.8343	1.47258e-09	0	0	0	0	-4.79642e-10	0	1.63435e-09	2.05576e-09	0	0	0	0	0	0	0	-8.66389e-09
1175.07	14.4813	2.07024e-09	0	0	0	0	0	0	1.83149e-09	0	0	0	0	0	0	0	0	0
1185.9	14.5792	0	0	0	0	0	0	0	0	0	0	0	0	0	0	0	0	0
1196.7	14.5482	2.67403e-06	2.40865e-06	2.40401e-06	2.39677e-06	2.38805e-06	2.3842e-06	2.37042e-06	2.35463e-06	2.34355e-06	2.33103e-06	2.311e-06	2.2934e-06	2.25767e-06	2.19903e-06	2.14759e-06	2.04361e-06	2.0722e-06
1207.6	14.6949	2.69591e-05	2.44929e-05	2.43773e-05	2.4248e-05	2.41682e-05	2.40463e-05	2.39311e-05	2.37313e-05	2.35556e-05	2.33526e-05	2.30653e-05	2.28302e-05	2.22789e-05	2.15815e-05	2.10142e-05	1.91629e-05	1.88099e-05
1218.23	14.5848	1.88685e-05	1.6718e-05	1.66369e-05	1.65403e-05	1.64588e-05	1.6364e-05	1.62991e-05	1.61369e-05	1.59751e-05	1.58605e-05	1.56679e-05	1.55536e-05	1.51584e-05	1.46714e-05	1.43011e-05	1.27025e-05	1.26736e-05
1229.48	15.038	6.43892e-06	5.6836e-06	5.64583e-06	5.61586e-06	5.58307e-06	5.54547e-06	5.51206e-06	5.45226e-06	5.38213e-06	5.33346e-06	5.24153e-06	5.19126e-06	5.04582e-06	4.83474e-06	4.70287e-06	3.98436e-06	3.97929e-06
1240.57	14.5454	5.60625e-07	4.98768e-07	4.90436e-07	4.88937e-07	4.71318e-07	4.78338e-07	4.75731e-07	4.69743e-07	4.78264e-07	4.6084e-07	4.51365e-07	4.5196e-07	4.31825e-07	4.06744e-07	4.09862e-07	3.82678e-07	3.75757e-07
1251.35	14.976	1.58477e-07	1.38768e-07	1.32884e-07	1.34777e-07	1.40212e-07	1.23206e-07	1.28836e-07	1.22032e-07	1.36805e-07	1.30668e-07	1.19142e-07	1.36535e-07	1.24864e-07	1.28631e-07	1.14832e-07	7.70535e-08	1.42844e-07
1262.86	15.0231	2.11369e-07	2.05576e-07	1.9764e-07	2.0106e-07	1.84745e-07	1.86175e-07	2.0295e-07	1.901e-07	1.89318e-07	1.76123e-07	1.76433e-07	1.83641e-07	2.0238e-07	1.79966e-07	1.76136e-07	1.59974e-07	1.99142e-07
1273.81	14.6921	1.09575e-08	1.34973e-08	1.16755e-08	1.00318e-08	5.27763e-09	7.65026e-09	4.73194e-09	9.11408e-09	1.05822e-08	1.05674e-08	1.24819e-08	1.93023e-08	8.0811e-09	5.24525e-09	1.04456e-08	1.52619e-08	1.347e-09
1284.76	14.6612	6.76469e-07	5.76754e-07	5.7402e-07	5.7174e-07	5.74023e-07	5.79655e-07	5.7171e-07	5.57793e-07	5.72908e-07	5.41899e-07	5.57535e-07	5.76723e-07	6.01018e-07	6.32822e-07	6.28913e-07	3.84336e-07	2.12181e-08
1295.65	14.6497	1.51083e-06	1.19129e-06	1.19995e-06	1.17598e-06	1.17593e-06	1.16598e-06	1.2004e-06	1.17624e-06	1.21075e-06	1.17972e-06	1.23218e-06	1.20909e-06	1.18388e-06	1.0597e-06	5.86702e-07	-1.66527e-07	-9.42012e-07
1306.5	14.6907	3.85415e-07	3.52528e-07	3.49777e-07	3.41513e-07	3.4993e-07	3.44675e-07	3.59125e-07	3.54585e-07	3.42119e-07	3.56455e-07	3.64926e-07	3.55118e-07	3.49432e-07	3.16538e-07	3.37143e-07	3.60193e-07	2.97839e-07
1317.47	14.8011	6.22042e-06	5.72189e-06	5.70945e-06	5.68683e-06	5.68644e-06	5.65613e-06	5.63586e-06	5.60223e-06	5.56854e-06	5.5391e-06	5.48718e-06	5.41688e-06	5.2392e-06	5.08505e-06	5.01641e-06	5.37688e-06	6.08814e-06
1328.54	14.8526	5.47395e-07	4.57606e-07	4.68813e-07	4.62147e-07	4.67795e-07	4.65943e-07	4.51704e-07	4.44412e-07	4.52567e-07	4.1849e-07	4.44418e-07	3.9829e-07	3.71702e-07	3.32829e-07	3.74311e-07	3.7259e-07	1.87783e-07
1339.4	14.642	2.79067e-06	2.76089e-06	2.79082e-06	2.78635e-06	2.78452e-06	2.77079e-06	2.76799e-06	2.73537e-06	2.72821e-06	2.69225e-06	2.6769e-06	2.67096e-06	2.69349e-06	2.66449e-06	2.77268e-06	2.848e-06	2.89837e-06
1350.04	14.7152	1.58093e-06	1.12803e-06	1.12385e-06	1.12071e-06	1.08857e-06	1.09216e-06	1.1351e-06	1.07177e-06	1.08549e-06	1.04695e-06	1.04442e-06	1.03876e-06	1.07736e-06	9.55204e-07	9.76519e-07	9.18965e-07	9.70636e-07
1361.33	15.4178	1.02246e-07	1.37546e-07	1.4189e-07	1.44296e-07	1.40325e-07	1.48352e-07	1.45756e-07	1.46976e-07	1.4059e-07	1.47032e-07	1.4428e-07	1.49038e-07	1.43558e-07	1.42953e-07	1.43568e-07	1.52692e-07	1.67131e-07
1373.13	14.528	4.76738e-07	5.56521e-07	5.63636e-07	5.5917e-07	5.42107e-07	5.96013e-07	5.99458e-07	5.5803e-07	6.32136e-07	5.49504e-07	5.81072e-07	5.71091e-07	5.84446e-07	5.9103e-07	6.15567e-07	6.59727e-07	6.90497e-07
1383.51	15.022	1.02688e-07	1.01041e-07	1.02737e-07	1.09059e-07	9.69568e-08	8.73354e-08	8.19111e-08	7.77655e-08	9.24075e-08	8.3413e-08	1.03723e-07	1.03163e-07	9.31415e-08	1.02809e-07	9.73972e-08	1.04881e-07	1.10096e-07
1394.92	14.3512	-6.07212e-13	2.57056e-08	4.38785e-09	3.33375e-10	1.0889e-08	6.0219e-11	2.99811e-09	4.50528e-09	9.61249e-09	5.50821e-09	3.51594e-09	6.68732e-10	-1.42978e-09	5.52531e-09	5.48364e-09	9.43143e-09	-3.67695e-09
1405.76	14.603	3.56836e-10	2.55681e-09	6.23758e-10	5.88487e-10	2.13911e-09	1.78736e-08	4.828e-09	1.77273e-10	2.30283e-08	-1.47483e-09	-2.46978e-09	-4.52906e-10	-3.25726e-09	3.15474e-09	-2.03783e-09	5.72473e-10	-4.75618e-09
1416.7	14.4414	1.42115e-09	7.12971e-09	-1.35754e-09	-2.14328e-10	6.20997e-10	1.04329e-08	-1.29449e-08	1.52647e-08	1.49709e-08	-9.89056e-10	-2.33482e-09	-2.09606e-09	-3.19704e-10	-7.09658e-10	-1.49651e-08	7.52491e-10	4.67876e-09
1427.45	14.3086	7.37664e-05	6.92181e-05	6.89854e-05	6.87639e-05	6.85864e-05	6.83851e-05	6.81998e-05	6.77706e-05	6.73538e-05	6.69176e-05	6.60146e-05	6.50534e-05	6.39182e-05	6.21666e-05	5.86121e-05	5.4484e-05	5.02033e-05
1438.5	14.7756	0.00024751	0.000213047	0.000212155	0.000211145	0.000210222	0.00020926	0.000208311	0.000206339	0.000204453	0.000202477	0.000198631	0.00019468	0.00019019	0.000183187	0.000170743	0.000156958	0.000143669
1449.25	14.0094	3.78273e-05	3.25467e-05	3.24594e-05	3.22991e-05	3.21836e-05	3.20805e-05	3.19279e-05	3.17443e-05	3.15398e-05	3.13251e-05	3.09867e-05	3.0687e-05	3.02255e-05	2.95739e-05	2.86012e-05	2.7691e-05	2.71907e-05
1459.41	13.9458	1.08232e-06	9.50323e-07	9.58817e-07	9.44844e-07	9.39437e-07	9.45792e-07	9.21258e-07	9.40675e-07	9.27117e-07	9.1787e-07	9.15757e-07	9.33374e-07	9.15482e-07	9.31277e-07	9.16158e-07	9.27754e-07	1.00642e-06
1470.03	14.5203	6.40063e-06	6.29996e-06	6.27513e-06	6.29497e-06	6.29211e-06	6.29234e-06	6.31275e-06	6.34945e-06	6.29451e-06	6.3031e-06	6.35511e-06	6.34428e-06	6.38061e-06	6.46783e-06	6.63649e-06	6.87265e-06	7.2103e-06
1480.99	14.3435	6.02921e-06	6.06944e-06	6.05699e-06	6.03556e-06	6.06936e-06	6.04828e-06	6.0493e-06	6.04035e-06	6.05847e-06	6.03735e-06	6.06615e-06	6.08866e-06	6.13978e-06	6.22157e-06	6.58626e-06	6.76664e-06	7.22133e-06
1491.53	14.1138	2.38184e-06	2.03752e-06	2.03554e-06	1.98177e-06	1.98141e-06	1.92218e-06	1.91266e-06	1.89001e-06	1.78689e-06	1.72996e-06	1.6438e-06	1.57806e-06	1.51324e-06	1.32241e-06	1.39207e-06	1.00741e-06	8.35242e-07
1502.1	14.2618	1.464e-06	1.3667e-06	1.35519e-06	1.36949e-06	1.33868e-06	1.34039e-06	1.32166e-06	1.34113e-06	1.30439e-06	1.30093e-06	1.29161e-06	1.23272e-06	1.20875e-06	1.18015e-06	1.33253e-06	1.17854e-06	1.19628e-06
1512.73	14.1849	1.84425e-08	2.58525e-08	2.49096e-08	2.01441e-08	4.70811e-08	2.77289e-08	2.2771e-08	1.23012e-08	1.4952e-08	3.70643e-08	1.21275e-08	7.28062e-09	1.64388e-08	8.50191e-09	4.04415e-08	-4.16313e-10	1.86241e-08
1523.31	14.1186	2.52558e-06	2.14871e-06	2.13181e-06	2.09483e-06	2.09956e-06	2.06074e-06	2.00398e-06	1.96837e-06	1.84238e-06	1.73679e-06	1.73685e-06	1.68143e-06	1.59424e-06	1.58907e-06	1.38445e-06	1.59903e-07	4.81758e-08
1533.88	14.0897	3.00589e-05	2.74753e-05	2.72964e-05	2.71576e-05	2.70156e-05	2.68581e-05	2.66761e-05	2.64618e-05	2.61541e-05	2.59343e-05	2.57247e-05	2.57124e-05	2.48305e-05	2.38084e-05	2.3036e-05	1.87179e-05	1.97043e-05
1544.35	13.9804	1.66677e-05	1.52767e-05	1.52125e-05	1.51258e-05	1.50444e-05	1.49636e-05	1.48994e-05	1.4771e-05	1.46575e-05	1.45326e-05	1.43338e-05	1.42454e-05	1.37886e-05	1.32353e-05	1.33027e-05	1.08489e-05	1.10645e-05
1554.88	14.0528	3.48783e-07	3.0645e-07	3.06756e-07	2.83223e-07	3.04751e-07	2.83709e-07	2.8364e-07	2.8668e-07	2.89283e-07	2.80167e-07	2.60042e-07	3.05205e-07	2.54857e-07	2.51476e-07	2.82629e-07	1.91497e-07	2.22266e-07
1565.38	13.924	5.16815e-05	5.17189e-05	5.13788e-05	5.1145e-05	5.08738e-05	5.05049e-05	5.02922e-05	4.97308e-05	4.93653e-05	4.90278e-05	4.84323e-05	4.78086e-05	4.63877e-05	4.4358e-05	4.17288e-05	3.70822e-05	3.68243e-05
1575.67	13.7729	0.000197455	0.000210781	0.000209632	0.00020855	0.000207496	0.000206383	0.000205497	0.000203377	0.000201562	0.00019996	0.000197076	0.00019494	0.00018992	0.000182921	0.000172409	0.000151261	0.000141076
1585.92	13.7984	4.3482e-05	4.37407e-05	4.34804e-05	4.32196e-05	4.2949e-05	4.27807e-05	4.25379e-05	4.21239e-05	4.17828e-05	4.14047e-05	4.07078e-05	4.02135e-05	3.90887e-05	3.75374e-05	3.5653e-05	3.04669e-05	2.9948e-05
1596.24	13.7969	5.92653e-05	6.20312e-05	6.17257e-05	6.14587e-05	6.11291e-05	6.08434e-05	6.05236e-05	6.00338e-05	5.95457e-05	5.90693e-05	5.83253e-05	5.78503e-05	5.61796e-05	5.3661e-05	4.97188e-05	4.15778e-05	3.89282e-05
1606.5	13.7232	0.000189922	0.000208029	0.00020707	0.000205944	0.000204958	0.000203958	0.000202962	0.000201163	0.000199388	0.000198126	0.000195063	0.000192726	0.00018763	0.000179229	0.00016856	0.000145036	0.000134531
1616.86	13.8942	5.37073e-05	5.33278e-05	5.28694e-05	5.25781e-05	5.2205e-05	5.19552e-05	5.15274e-05	5.1031e-05	5.04019e-05	4.99881e-05	4.90172e-05	4.83397e-05	4.69218e-05	4.52616e-05	4.47752e-05	3.71058e-05	3.65812e-05
1627.04	13.4867	4.16682e-06	3.51839e-06	3.47234e-06	3.34836e-06	3.20396e-06	3.16167e-06	2.93662e-06	2.82838e-06	2.47756e-06	2.49001e-06	2.49501e-06	2.39584e-06	2.2162e-06	1.80928e-06	9.46732e-07	-2.72557e-08	-6.19727e-07
1637.06	13.4903	1.62407e-05	1.48488e-05	1.48301e-05	1.47067e-05	1.46015e-05	1.45391e-05	1.441e-05	1.42198e-05	1.41494e-05	1.4047e-05	1.38224e-05	1.37746e-05	1.32703e-05	1.24022e-05	1.16271e-05	8.32343e-06	8.84387e-06
1647.21	13.4457	3.1472e-05	2.94098e-05	2.92832e-05	2.91872e-05	2.90462e-05	2.89111e-05	2.88032e-05	2.86089e-05	2.84627e-05	2.83972e-05	2.83516e-05	2.86176e-05	2.75839e-05	2.63152e-05	2.55001e-05	2.13385e-05	2.42528e-05
1656.95	12.8478	7.85081e-06	6.995e-06	6.91618e-06	6.83758e-06	6.80569e-06	6.68383e-06	6.81665e-06	6.67031e-06	6.65853e-06	6.59072e-06	6.59502e-06	6.70016e-06	6.35846e-06	5.78798e-06	6.08547e-06	5.12773e-06	6.16064e-06
1667.11	13.578	1.95627e-06	1.70878e-06	1.66724e-06	1.64884e-06	1.58252e-06	1.60462e-06	1.57644e-06	1.50328e-06	1.4944e-06	1.46871e-06	1.50661e-06	1.56481e-06	1.42691e-06	1.24684e-06	1.00194e-06	4.08661e-07	4.33411e-07
1677.32	13.0764	4.31236e-07	3.66932e-07	3.76369e-07	3.73314e-07	3.73431e-07	3.58121e-07	3.38883e-07	3.34744e-07	3.54065e-07	3.42305e-07	3.30735e-07	3.02952e-07	3.40942e-07	3.35331e-07	3.05414e-07	2.13049e-07	3.05276e-07
1687.34	13.101	1.23958e-07	9.95254e-08	9.38511e-08	1.03737e-07	1.13997e-07	1.20317e-07	1.17853e-07	5.39688e-08	9.35114e-08	1.16256e-07	8.44795e-08	5.01792e-08	6.61134e-08	7.45189e-08	1.2523e-07	7.11727e-08	8.56821e-08
1697.21	13.2224	1.81278e-08	1.91278e-08	1.59254e-08	7.25866e-09	1.34539e-08	2.03524e-08	2.2127e-08	1.67216e-08	1.24618e-08	3.51076e-08	4.94452e-08	0	3.53396e-08	-1.44754e-08	2.19103e-08	-4.79793e-09	4.92091e-09
1707.02	13.2015	1.68232e-08	2.03358e-09	3.21742e-08	1.81764e-08	3.47447e-08	2.43004e-08	5.40234e-09	1.02578e-08	3.19039e-08	2.50968e-08	1.33102e-08	4.46526e-08	1.39341e-08	1.44696e-08	1.30339e-08	1.51015e-08	2.01837e-08
1716.81	12.9751	1.5059e-08	1.10059e-08	2.86089e-09	-4.49393e-09	2.54146e-08	2.12639e-08	0	-6.91089e-09	3.5487e-08	4.67083e-09	-3.59508e-09	1.7964e-08	9.40392e-09	3.28876e-24	1.24247e-08	1.35338e-09	1.35657e-08
1726.58	12.8046	2.36717e-09	5.26919e-09	1.70706e-08	-4.23872e-09	2.03918e-08	9.61646e-09	4.05191e-09	9.05036e-09	1.54264e-08	1.78747e-09	5.94047e-09	-1.61038e-08	2.51989e-10	0	1.38192e-08	1.81406e-08	1.64283e-08
1736.38	12.8313	0	0	-8.44928e-10	-1.20967e-09	-8.39163e-10	0	0	0	0	0	-1.9941e-08	-1.79764e-08	1.09692e-08	0	1.1147e-08	8.65043e-09	3.58316e-09
1746.1	13.0023	0	0	-2.38311e-09	4.61507e-09	0	0	4.47704e-09	0	-4.65215e-09	0	0	0	0	0	8.9183e-09	-5.51166e-09	-3.53855e-09
1755.77	13.0233	2.23917e-07	1.85401e-07	2.02693e-07	1.89088e-07	1.90644e-07	1.76557e-07	1.92016e-07	1.89619e-07	2.19651e-07	1.36986e-07	1.79754e-07	2.03915e-07	1.43879e-07	2.24771e-07	2.10218e-07	1.84982e-07	2.09933e-07
1765.44	12.6574	1.53601e-07	1.15099e-07	1.27219e-07	1.35308e-07	1.31507e-07	1.30892e-07	9.06144e-08	1.08435e-07	1.97661e-07	9.88824e-08	1.00841e-07	1.61775e-07	1.00611e-07	2.64566e-07	1.2049e-07	9.35349e-08	1.27718e-07
1775.04	12.4278	7.272e-09	3.94818e-08	3.16144e-08	3.08962e-08	5.16351e-08	5.41518e-08	6.1652e-09	8.48328e-09	4.20188e-08	2.73666e-08	8.03956e-09	8.99547e-09	2.61533e-08	3.46589e-08	1.49969e-08	1.79983e-08	3.50619e-08
1784.57	12.6008	1.55724e-07	1.48329e-07	1.6221e-07	1.3443e-07	1.51347e-07	1.61459e-07	1.34922e-07	1.62489e-07	1.38408e-07	1.62006e-07	1.15125e-07	9.88043e-08	8.07291e-08	1.74935e-07	1.40933e-07	1.61915e-07	2.02686e-07
1793.88	12.697	1.54413e-07	1.34624e-07	1.56771e-07	1.2414e-07	1.3556e-07	1.77565e-07	1.72021e-07	1.84567e-07	1.68258e-07	1.05002e-07	1.86503e-07	1.21043e-07	9.66112e-08	1.72728e-07	1.64792e-07	1.93065e-07	1.88423e-07
1803.51	12.5221	4.1282e-08	6.29125e-08	4.21329e-08	6.81763e-08	4.25734e-08	3.82046e-08	1.13973e-07	3.60293e-08	6.42584e-08	1.00221e-07	1.47505e-08	8.16122e-08	2.26722e-08	4.11178e-08	2.28844e-08	5.51455e-08	1.5101e-08
1812.93	12.2902	4.51872e-09	3.46322e-08	7.36219e-09	9.85054e-09	6.1852e-09	1.458e-08	-1.56537e-08	8.30841e-10	8.15325e-10	4.82907e-08	3.17382e-09	8.25309e-09	5.4499e-09	1.02655e-08	1.03986e-08	2.92552e-08	3.40327e-08
1822.29	12.8994	6.40247e-09	-2.49051e-08	-1.31173e-08	-1.9581e-08	-1.92357e-08	-2.46404e-08	-1.42884e-08	-2.82887e-08	-2.02465e-08	-3.43261e-08	-2.86849e-08	-2.09626e-08	-3.93405e-08	-1.55766e-08	-2.79697e-08	-6.82654e-08	-7.0084e-08
1831.86	12.321	5.34538e-08	1.04557e-07	1.07825e-07	1.08844e-07	1.04991e-07	1.09175e-07	1.09356e-07	9.15652e-08	9.59214e-08	1.06622e-07	8.17109e-08	1.1681e-07	1.1573e-07	1.19422e-07	1.03386e-07	1.12086e-07	1.05547e-07
1841.17	12.4709	-2.10562e-08	-6.71102e-08	-6.71775e-08	-3.44518e-08	-3.44908e-08	-3.4532e-08	-3.45756e-08	-3.46709e-08	-3.47774e-08	-3.78139e-08	-3.6554e-08	-3.69166e-08	-1.2389e-08	-3.51821e-08	-3.72363e-08	-4.04827e-08	-4.3576e-08
1850.44	12.3586	-3.80897e-08	-6.97682e-08	-6.9862e-08	-6.99615e-08	-7.00673e-08	-7.22074e-08	-7.23301e-08	-7.17227e-08	-7.20178e-08	-7.23478e-08	-7.31264e-08	-7.40887e-08	-5.49387e-08	-7.63591e-08	-8.20399e-08	-9.0778e-08	-9.90064e-08
1859.48	12.2035	-5.86807e-09	-9.74777e-09	-1.69531e-08	-1.07997e-08	-1.14206e-08	-1.14382e-08	-9.55978e-09	-1.08885e-08	-1.187e-08	-3.37313e-09	-8.11545e-09	-8.24106e-10	-1.03541e-08	-9.4466e-09	8.70995e-09	-1.51617e-08	-1.63376e-08
1868.14	11.3546	1.84394e-06	3.31548e-06	3.27245e-06	3.3328e-06	3.27705e-06	3.2971e-06	3.31768e-06	3.32268e-06	3.31846e-06	3.35944e-06	3.41034e-06	3.4449e-06	3.47804e-06	3.59754e-06	3.84504e-06	4.20776e-06	4.54408e-06
1878.47	12.6107	5.59879e-05	4.12582e-05	4.11733e-05	4.10654e-05	4.10403e-05	4.09557e-05	4.09084e-05	4.07108e-05	4.05715e-05	4.03595e-05	3.99709e-05	3.95803e-05	3.92014e-05	3.84613e-05	3.71058e-05	3.56552e-05	3.46539e-05
1886.94	11.5635	3.28782e-05	2.85769e-05	2.85675e-05	2.85296e-05	2.85178e-05	2.84508e-05	2.84447e-05	2.84122e-05	2.83429e-05	2.82618e-05	2.80982e-05	2.7991e-05	2.78446e-05	2.76209e-05	2.72847e-05	2.71266e-05	2.71589e-05
1895.88	11.5962	5.22829e-06	9.0243e-06	9.05077e-06	9.06218e-06	9.1122e-06	9.13087e-06	9.17604e-06	9.14368e-06	9.20714e-06	9.31044e-06	9.46086e-06	9.60922e-06	9.88005e-06	1.02264e-05	1.1137e-05	1.2396e-05	1.37019e-05
1904.73	12.5711	2.90596e-06	4.57829e-06	4.52509e-06	4.56447e-06	4.61859e-06	4.60404e-06	4.58453e-06	4.60634e-06	4.63841e-06	4.59573e-06	4.66862e-06	4.8171e-06	4.80149e-06	4.96753e-06	5.31719e-06	5.83835e-06	6.28045e-06
1914.15	11.7418	6.42394e-07	8.65446e-07	8.56134e-07	8.3091e-07	8.70222e-07	8.31643e-07	8.38795e-07	8.28236e-07	8.68891e-07	7.83478e-07	9.01235e-07	8.2798e-07	8.85869e-07	8.70134e-07	1.01227e-06	9.5831e-07	1.02952e-06
1923.18	12.0039	5.48053e-07	6.26152e-07	6.01109e-07	6.2266e-07	6.15129e-07	6.11234e-07	5.87444e-07	6.07844e-07	6.23535e-07	6.22152e-07	6.27027e-07	6.03074e-07	6.52536e-07	6.46951e-07	6.59356e-07	7.53175e-07	9.05869e-07
1932.06	11.6661	3.88067e-06	3.08299e-06	3.06244e-06	3.09019e-06	3.01211e-06	3.13289e-06	2.95956e-06	3.04273e-06	2.92973e-06	3.0067e-06	2.9851e-06	2.97748e-06	2.99754e-06	3.01134e-06	3.04083e-06	3.42094e-06	3.66214e-06
1940.92	11.8169	0.000200888	0.000139113	0.000137961	0.000136929	0.000135746	0.000134736	0.000133597	0.000131385	0.000129224	0.000127102	0.000122847	0.000118622	0.00011413	0.000107496	9.64081e-05	8.57528e-05	7.64882e-05
1949.71	11.5385	0.000885562	0.000708782	0.000704369	0.000700126	0.000695799	0.000691479	0.000687077	0.00067826	0.000669405	0.000660398	0.000642154	0.000623562	0.000604225	0.000573303	0.000514578	0.000454024	0.000393628
1958.44	11.4733	0.00128723	0.00105998	0.00105496	0.00104994	0.00104486	0.0010398	0.00103458	0.00102407	0.00101339	0.00100252	0.000980228	0.000957019	0.000931935	0.000891044	0.00081052	0.000722789	0.000637923
1967.13	11.5707	0.000977162	0.000844098	0.000839889	0.000835719	0.00083135	0.000827163	0.000822865	0.000814155	0.000805568	0.000796973	0.000779661	0.000762083	0.000743731	0.000714964	0.00066086	0.000604696	0.000546613
1975.83	11.4434	0.000263037	0.000254851	0.000253465	0.000252211	0.000250885	0.000249623	0.000248301	0.000245712	0.000243227	0.000240775	0.000235738	0.000230896	0.000224447	0.000214167	0.000194477	0.000169202	0.000145292
1984.58	11.6345	4.83233e-05	4.3295e-05	4.30933e-05	4.28667e-05	4.28679e-05	4.25742e-05	4.25679e-05	4.20985e-05	4.20789e-05	4.20047e-05	4.18822e-05	4.20973e-05	4.14071e-05	4.01444e-05	3.95028e-05	3.51242e-05	3.80941e-05
1993.29	11.3157	0.000194852	0.000184766	0.000184219	0.000183428	0.00018285	0.000182354	0.000181847	0.000180744	0.000179674	0.000178709	0.000176836	0.00017536	0.000172345	0.000167636	0.000158584	0.000146401	0.000139404
2001.88	11.4422	0.00205562	0.00173832	0.00173045	0.00172269	0.00171467	0.0017067	0.00169855	0.00168202	0.00166495	0.00164747	0.00161082	0.00157187	0.0015325	0.00146692	0.00133204	0.00119013	0.0010494
2010.46	11.2577	0.00283433	0.00228441	0.00227174	0.00225896	0.00224604	0.00223304	0.00221985	0.00219316	0.00216588	0.00213793	0.00207986	0.00201832	0.00195923	0.00186198	0.00166453	0.00146893	0.0012714
2019.09	11.3366	0.00169088	0.00142176	0.00141471	0.00140773	0.00140057	0.00139349	0.00138627	0.00137172	0.00135705	0.00134204	0.0013111	0.00127881	0.0012472	0.0011952	0.00109065	0.000985822	0.000871573
2027.54	11.1218	0.000540975	0.000500192	0.000497234	0.000494594	0.000491891	0.000489216	0.000486519	0.000481111	0.000475939	0.000470741	0.000460449	0.00045002	0.000438288	0.00042034	0.000385589	0.000342612	0.000306373
2036.04	11.2636	0.000283547	0.000263907	0.00026263	0.000260951	0.000259575	0.000258112	0.000256777	0.000254205	0.000251823	0.000249669	0.000246381	0.000244397	0.000237906	0.00022901	0.000218494	0.00018474	0.000186795
2044.46	11.0174	0.000396848	0.000397476	0.000395685	0.000393468	0.00039184	0.000390114	0.000388189	0.000384724	0.000380918	0.000377426	0.000371106	0.000365664	0.000357454	0.000344195	0.00031911	0.000278626	0.000255764
2052.82	11.071	0.00102534	0.000955559	0.000950816	0.000946045	0.000941097	0.000936427	0.000931442	0.000921185	0.000911068	0.000900319	0.00087836	0.000854922	0.000834982	0.000802465	0.000733335	0.000672222	0.000601004
2061.17	10.9786	0.000772363	0.000728339	0.000724606	0.000721055	0.000717387	0.000713837	0.000710265	0.000702742	0.000695421	0.000687733	0.000672397	0.000656108	0.000640811	0.000615362	0.000563456	0.000510424	0.000454166
2069.56	11.1227	0.000781266	0.000722381	0.000718527	0.00071459	0.000710772	0.0007069	0.000703027	0.000695321	0.000687529	0.000679422	0.000662755	0.000645604	0.000630146	0.000605494	0.000555176	0.000502381	0.000448847
2077.8	10.9102	0.000427745	0.000413952	0.000411774	0.00040956	0.000407442	0.000405445	0.000403235	0.000399419	0.000395698	0.000391902	0.000384998	0.000378708	0.000369144	0.000354219	0.000329583	0.000287011	0.000264318
2086.15	11.0754	0.000296727	0.000278664	0.000277033	0.000275306	0.000273594	0.000271925	0.000270409	0.000267247	0.000264802	0.000261916	0.000257673	0.000254888	0.000246791	0.00023538	0.000219276	0.00018354	0.000179225
2094.44	10.8328	0.000135339	0.000122008	0.000120991	0.000120184	0.000119284	0.000118458	0.000117643	0.000116139	0.000114955	0.000113797	0.000112214	0.000111704	0.000107415	0.0001021	9.87129e-05	7.09589e-05	8.27482e-05
2102.57	10.8621	4.64838e-05	4.29093e-05	4.26819e-05	4.25754e-05	4.24777e-05	4.21144e-05	4.20483e-05	4.16353e-05	4.19664e-05	4.1933e-05	4.27156e-05	4.277e-05	4.11061e-05	3.9215e-05	3.65794e-05	2.40599e-05	4.30768e-05
2110.82	10.851	2.73196e-05	2.43944e-05	2.43056e-05	2.41828e-05	2.42422e-05	2.40328e-05	2.38999e-05	2.38262e-05	2.36683e-05	2.31555e-05	2.31701e-05	2.34816e-05	2.29963e-05	2.17895e-05	1.6614e-05	9.95956e-06	1.39839e-05
2118.99	10.8112	1.23247e-05	1.01779e-05	1.01175e-05	9.70576e-06	9.57745e-06	9.11383e-06	8.96227e-06	8.79056e-06	8.30314e-06	7.87853e-06	7.37003e-06	7.16424e-06	6.14545e-06	5.03324e-06	3.73476e-06	-3.6373e-06	-5.24646e-06
2127.12	10.6388	2.75217e-06	2.39523e-06	2.35064e-06	2.23211e-06	2.29094e-06	2.0174e-06	1.99364e-06	1.81731e-06	1.75587e-06	1.7945e-06	1.74904e-06	1.6465e-06	1.44095e-06	1.12265e-06	7.01922e-07	-1.75856e-06	-1.4599e-06
2135.24	10.7428	1.84137e-06	1.55378e-06	1.54733e-06	1.47504e-06	1.4774e-06	1.3781e-06	1.45382e-06	1.29684e-06	1.16145e-06	1.28897e-06	8.53565e-07	8.13789e-07	6.30575e-07	3.00621e-07	-2.1526e-07	-2.40824e-06	-2.67284e-06
2143.22	10.5323	5.00717e-06	4.11559e-06	4.26493e-06	3.86957e-06	4.02361e-06	3.61931e-06	3.86579e-06	3.62927e-06	3.22811e-06	2.96004e-06	2.33166e-06	2.31583e-06	1.66587e-06	1.14409e-06	1.1524e-06	3.39204e-06	1.18374e-05
2151.13	10.577	1.67014e-05	1.46731e-05	1.47424e-05	1.42473e-05	1.42739e-05	1.39265e-05	1.39532e-05	1.36072e-05	1.32319e-05	1.27964e-05	1.23283e-05	1.19234e-05	1.21249e-05	1.30464e-05	1.80714e-05	1.86887e-05	3.01793e-05
2159.29	10.8203	1.17052e-05	1.00971e-05	9.63132e-06	9.57418e-06	9.54379e-06	9.48103e-06	8.83914e-06	8.62946e-06	8.34989e-06	8.13982e-06	7.53258e-06	7.13792e-06	6.26596e-06	4.90973e-06	2.54515e-06	5.09525e-06	1.6803e-05
2167.24	10.2622	9.59598e-06	8.70462e-06	8.6032e-06	8.5214e-06	8.21946e-06	8.10153e-06	8.0661e-06	7.64337e-06	7.46736e-06	7.07035e-06	6.55606e-06	6.41602e-06	5.65997e-06	4.40478e-06	1.88809e-06	-1.67139e-06	1.87892e-06
2175.09	10.6874	3.38406e-06	2.54209e-06	2.45833e-06	2.64993e-06	2.41535e-06	2.48774e-06	2.42488e-06	2.38944e-06	2.25767e-06	2.05263e-06	1.791e-06	1.52655e-06	9.92798e-07	-4.45894e-07	-2.58776e-06	-6.72344e-06	-1.05677e-05
2183.15	10.3148	7.37763e-07	5.64692e-07	4.05959e-07	5.58845e-07	7.44589e-07	6.25544e-07	6.18384e-07	5.74725e-07	5.15212e-07	3.57167e-07	4.96207e-07	4.63772e-07	4.15725e-07	3.26983e-07	2.09291e-07	-2.41863e-07	-4.56078e-07
2190.83	10.3889	8.32623e-07	8.70148e-07	8.48918e-07	8.12146e-07	6.46263e-07	7.27112e-07	8.40001e-07	8.07136e-07	7.85735e-07	6.75353e-07	7.12616e-07	7.63828e-07	7.14959e-07	7.11884e-07	7.85453e-07	4.48959e-07	8.19338e-07
2198.86	10.5417	2.43821e-07	1.93463e-07	2.21852e-07	2.12289e-07	3.85989e-07	1.35765e-07	1.39081e-07	5.03537e-07	4.60064e-07	2.18933e-07	1.98682e-07	2.06489e-07	1.49861e-07	1.56447e-07	2.41639e-07	1.40071e-07	2.23875e-07
2206.59	10.1254	1.94267e-07	1.50087e-07	1.44378e-07	1.49531e-07	1.20445e-07	1.10038e-07	1.5521e-07	2.50304e-07	9.52884e-08	6.25177e-08	1.25494e-07	1.21002e-07	1.20794e-07	1.27097e-07	1.74921e-07	8.58139e-08	2.17285e-07
2214.33	10.3834	2.82827e-07	2.96449e-07	2.38557e-07	2.38627e-07	2.40346e-07	2.31529e-07	3.26238e-07	4.47452e-07	1.73767e-07	2.73017e-07	2.44357e-07	2.5434e-07	2.30009e-07	2.34006e-07	2.73481e-07	2.23391e-07	3.55123e-07
2222.15	10.1301	2.38627e-07	2.90266e-07	1.42309e-07	9.47302e-08	2.08076e-07	1.91746e-07	1.80732e-07	1.75775e-07	1.7262e-07	4.66473e-07	1.63691e-07	1.72695e-07	1.51487e-07	1.29955e-07	2.1579e-07	1.02786e-07	2.09131e-07
2229.74	10.3142	8.98605e-08	2.61769e-07	2.88812e-07	1.83479e-07	1.67178e-07	8.58533e-08	2.29926e-07	1.32623e-07	1.04178e-07	8.22688e-08	1.14025e-07	1.22917e-07	1.2016e-07	6.10795e-08	8.37506e-08	2.93221e-08	8.02645e-08
2237.62	10.273	5.1833e-08	0	8.36966e-08	3.05744e-08	0	8.94711e-24	0	0	0	1.8158e-09	3.43155e-08	2.40315e-08	2.35706e-08	2.90338e-08	2.22648e-08	1.99532e-08	1.34054e-08
2245.2	10.1004	1.15887e-07	0	4.36561e-08	3.55731e-08	7.07249e-08	9.64288e-08	6.36855e-08	8.624e-08	7.0801e-08	9.20282e-08	4.03931e-08	6.35066e-08	6.09212e-08	5.12251e-08	8.57353e-08	3.00507e-08	5.1791e-08
2252.83	10.165	2.18827e-07	1.17414e-07	1.18052e-07	2.37449e-07	1.93736e-07	1.39628e-07	8.23187e-08	1.23516e-07	2.35355e-07	1.96335e-07	1.60364e-07	1.63178e-07	1.56725e-07	1.6094e-07	2.0004e-07	9.01512e-08	7.6442e-08
2260.58	10.1894	1.01337e-07	1.98134e-07	0	1.48489e-07	1.16775e-07	1.53629e-07	9.02358e-08	1.66493e-07	7.49494e-08	1.06413e-07	1.21083e-07	8.66835e-08	1.37808e-07	1.02361e-07	7.70202e-08	8.2546e-08	0
2268.02	9.94387	7.39593e-09	4.2655e-08	4.87469e-08	0	6.44163e-08	7.89211e-08	9.00874e-08	6.88123e-08	5.62823e-08	3.76497e-08	2.05002e-08	4.12288e-08	2.54467e-08	4.17378e-08	8.04675e-09	1.4818e-08	6.43759e-08
2275.74	10.1886	5.12766e-08	2.42963e-24	1.16225e-07	1.37398e-08	2.34925e-08	8.88253e-08	1.39843e-08	7.53459e-08	5.66147e-08	4.70993e-08	4.81649e-08	5.72406e-08	2.97069e-08	6.41877e-08	6.96721e-08	-4.56099e-08	6.16757e-08
2283.2	9.78521	4.62609e-08	0	8.92671e-08	5.01633e-09	3.06795e-09	3.58423e-09	6.41234e-09	3.22357e-09	3.6128e-08	3.78737e-08	2.04284e-08	4.81801e-08	4.06978e-09	1.07462e-08	8.26928e-08	7.74063e-09	-1.06904e-08
2290.54	10.0038	0	0	0	0	0	3.4091e-09	0	7.87651e-09	3.03431e-08	1.5658e-08	2.91555e-09	3.49333e-08	1.33662e-09	1.1556e-09	1.35878e-10	5.49828e-08	5.20256e-08
2298.27	9.97127	0	0	0	0	5.3896e-09	4.63484e-09	3.96843e-09	5.40613e-09	1.35851e-08	3.259e-12	1.27004e-08	1.14998e-08	-3.50029e-09	1.68895e-08	1.93408e-08	3.21232e-08	6.2197e-08
2305.44	9.63447	2.71849e-08	1.88786e-08	0	3.15686e-09	-3.68931e-08	-3.86952e-09	0	-6.11248e-10	2.30347e-08	5.38274e-09	-7.44023e-10	-3.09698e-09	-6.65489e-09	0	1.89411e-08	0	3.18926e-08
2312.87	10.1359	0	1.45498e-08	0	0	-6.80001e-25	0	0	2.42624e-08	1.28885e-08	1.57696e-08	-9.63877e-09	8.53812e-09	1.60719e-08	4.28525e-10	1.2593e-08	6.48315e-08	8.04934e-08
2320.56	9.74905	0	6.51578e-09	0	0	1.94227e-08	5.24944e-08	0	0	5.00882e-09	4.81982e-09	6.30193e-09	-2.63227e-09	-3.97302e-09	2.44367e-08	0	9.2138e-08	1.05095e-33
2327.54	9.65826	0	0	0	0	0	0	0	0	6.48396e-09	6.52683e-09	0	-4.97226e-24	-1.60347e-08	-2.13362e-08	0	0	-3.91547e-08
2335.15	10.0542	0	0	0	0	0	2.95486e-09	0	0	4.58658e-09	0	0	6.94091e-25	1.73261e-08	-2.98586e-08	-2.34238e-08	0	8.92049e-09
2342.53	9.56876	0	0	0	0	0	1.57736e-08	0	9.0884e-09	-4.50708e-10	0	0	7.06632e-09	0	0	0	-3.74581e-08	8.24151e-09
2349.51	9.55708	0	0	0	0	-6.92252e-09	0	0	0	-6.09427e-09	0	0	0	0	0	0	-5.68108e-08	0
2356.96	9.92805	0	0	0	0	4.62234e-09	0	0	3.64214e-09	-9.22613e-09	0	0	0	1.01302e-24	7.41936e-09	0	-7.39766e-08	-1.26064e-09
2364.29	9.46855	0	0	0	5.43927e-09	-8.89115e-10	0	0	-1.12628e-08	0	0	6.80623e-09	0	1.16152e-08	0	-6.40875e-25	4.13461e-09	-1.73841e-10
2371.27	9.49267	0	0	3.75362e-09	2.96758e-09	4.52905e-09	0	0	1.09127e-08	0	1.17337e-08	0	0	9.38001e-09	0	0	0	-1.64705e-09
2378.44	9.61255	0	-2.93192e-09	0	2.25817e-09	0	0	0	1.3792e-09	0	0	1.40593e-09	0	-1.40978e-08	0	1.07012e-23	0	-2.83624e-09
2385.73	9.63909	0	0	0	0	0	5.42378e-09	0	3.79796e-09	1.74755e-08	-3.51046e-24	1.17476e-09	-1.10474e-24	-8.53856e-09	-1.5417e-08	2.27406e-24	1.76459e-23	-3.28704e-09
2392.76	9.29032	0	0	0	5.72201e-24	0	2.63191e-09	1.54934e-10	7.0246e-09	4.19409e-09	3.12206e-09	0	-2.99452e-24	1.44694e-08	-1.05522e-09	-4.37755e-08	-1.40257e-08	-6.90908e-09
2399.73	9.60672	0	0	0	3.33863e-09	0	0	0	0	0	-3.39982e-09	0	-3.91207e-24	6.9668e-09	0	-7.45324e-09	-1.45657e-24	1.29798e-08
2407.24	9.64439	0	0	0	5.73799e-09	5.70673e-09	9.58075e-09	1.28619e-08	0	0	5.70616e-10	0	-4.14269e-09	1.71771e-08	5.72378e-09	-5.19855e-09	-8.76508e-09	1.9069e-08
2414.09	8.96147	0	8.47167e-09	1.06917e-08	8.36709e-25	1.17246e-08	0	0	0	3.7992e-09	5.985e-09	2.0519e-08	0	0	-1.40522e-08	1.47078e-08	-1.40053e-08	2.20592e-08
2420.91	9.61238	0	1.17321e-08	0	-3.71456e-09	3.47941e-09	7.03006e-09	0	1.17535e-08	-2.91912e-09	1.31407e-08	-1.16823e-08	0	9.62578e-09	6.7482e-09	-5.61649e-08	3.99491e-09	1.57316e-08
2428.33	9.44559	0	-3.4774e-08	9.73605e-09	0	2.46446e-08	8.99867e-09	0	0	1.30071e-08	7.61811e-09	0	0	1.9143e-08	1.2138e-08	0	1.51305e-23	9.89536e-10
2435.22	9.3097	3.03e-08	0	0	0	9.67843e-09	1.2664e-08	8.94696e-09	-6.77153e-09	1.27347e-08	-1.45759e-24	5.82236e-09	3.36959e-09	2.12318e-08	0	0	-1.07145e-08	-1.25997e-08
2442.07	8.81877	2.48862e-08	5.24627e-08	9.3652e-09	3.46792e-24	3.22366e-08	1.78882e-08	1.45416e-08	-3.47018e-09	3.09319e-09	-3.65377e-09	3.95209e-09	3.89208e-09	0	0	2.66581e-08	0	-2.76965e-08
2448.81	9.38408	0	5.011e-09	6.48329e-09	0	0	1.7676e-09	9.46931e-09	9.71906e-09	0	1.88277e-09	0	7.06469e-09	0	0	8.97105e-09	4.13164e-09	-2.07399e-08
2456.2	9.35962	0	5.12142e-25	7.0967e-09	1.68377e-08	0	1.36169e-08	1.28969e-08	1.21064e-08	0	1.95375e-08	8.3213e-09	7.536e-09	0	0	7.95951e-09	-8.6988e-10	1.2474e-08
2462.72	8.86375	2.17367e-08	7.37132e-09	2.52483e-09	5.81548e-09	1.53864e-08	7.01892e-09	3.18746e-08	1.16943e-08	2.93327e-08	1.33337e-08	2.67667e-08	0	1.67706e-08	5.66201e-24	2.41562e-08	6.47981e-08	3.15155e-08
2469.32	9.10723	4.96235e-08	1.15304e-07	7.28582e-08	1.55073e-08	8.23488e-08	8.99608e-08	5.30439e-08	5.37448e-08	8.69847e-08	4.69346e-08	3.50237e-08	4.30711e-08	7.79856e-08	8.70757e-08	3.36389e-08	8.64016e-08	6.49173e-08
2476.64	9.57509	5.44966e-09	6.57608e-08	1.59185e-09	1.41579e-08	3.3297e-08	3.53887e-08	6.53107e-08	3.58446e-08	2.71361e-08	1.3235e-08	1.27637e-08	1.15194e-09	7.34877e-08	2.98349e-08	1.713e-09	1.02178e-08	2.03739e-08
2483.46	8.89409	3.48309e-06	3.4717e-06	3.4722e-06	3.45925e-06	3.49356e-06	3.43418e-06	3.44847e-06	3.42028e-06	3.51722e-06	3.62456e-06	3.54434e-06	3.65527e-06	3.53077e-06	3.67387e-06	4.25247e-06	5.35854e-06	6.97375e-06
2489.9	8.98538	4.08705e-06	3.78291e-06	3.82383e-06	3.76428e-06	3.83016e-06	3.77709e-06	3.75375e-06	3.75522e-06	3.8448e-06	3.89416e-06	3.84853e-06	3.96444e-06	3.86475e-06	3.92421e-06	4.48282e-06	5.44842e-06	6.91008e-06
2496.76	9.439	1.81708e-06	1.70132e-06	1.67387e-06	1.69912e-06	1.68342e-06	1.69856e-06	1.65288e-06	1.62551e-06	1.68087e-06	1.68003e-06	1.66399e-06	1.63786e-06	1.68081e-06	1.7185e-06	1.62276e-06	1.85309e-06	2.03565e-06
