# Supplementary material for: Towards global carbon transparency: Spaceborne imaging spectroscopy enables precise CO2 emission quantification at facility scale
Source: Research Square preprint supplement (doi:10.21203/rs.3.rs-5913782/v1), 2025-01-29
Supplement: Supplementary file 16 [file CO2_k_v2.xlsx]

## Sheet: k_ZY1E
Wavelength	FWHM	k_Summer_L	k_Summer_M	k_Summer_H	k_Winter_L	k_Winter_M	k_Winter_H	k_1976_L	k_1976_M	k_1976_H
1005.6	16.26	0	0	0	0	0	0	0	0	0
1022.21	16.26	0	0	0	0	0	0	0	0	0
1039.19	16.26	3.54228e-07	3.52589e-07	3.54248e-07	3.53191e-07	3.61566e-07	3.63854e-07	3.58028e-07	3.57354e-07	3.54825e-07
1055.87	16.26	8.21483e-07	8.16708e-07	8.10804e-07	8.25829e-07	8.25378e-07	8.24225e-07	8.08182e-07	8.13561e-07	8.17168e-07
1072.55	16.26	8.97573e-08	9.59181e-08	9.31367e-08	9.13817e-08	8.84246e-08	1.01387e-07	9.20359e-08	8.88676e-08	1.01327e-07
1089.23	16.26	1.11692e-09	0	1.50205e-09	1.18707e-09	2.10035e-09	1.01316e-09	2.35873e-09	1.93259e-09	1.33547e-09
1105.91	16.26	0	0	0	0	0	0	0	0	0
1122.59	16.26	0	0	0	1.42076e-09	0	0	0	0	0
1139.44	16.26	0	0	0	7.88032e-10	0	0	1.75734e-09	0	4.93764e-09
1156.41	16.26	0	0	0	0	0	0	0	0	0
1173.29	16.26	0	0	0	0	0	0	0	0	0
1190.17	16.26	0	0	1.38502e-09	0	0	0	0	0	0
1207.04	16.26	2.54824e-05	2.4997e-05	2.4557e-05	2.56761e-05	2.51954e-05	2.47423e-05	2.54586e-05	2.49738e-05	2.45362e-05
1223.92	16.26	1.72543e-05	1.73182e-05	1.7405e-05	1.73787e-05	1.74375e-05	1.75233e-05	1.72338e-05	1.72803e-05	1.73683e-05
1240.8	16.26	5.51539e-07	5.5361e-07	5.55734e-07	5.31035e-07	5.28966e-07	5.323e-07	5.5463e-07	5.5078e-07	5.41394e-07
1257.4	16.26	2.30742e-07	2.34331e-07	2.29098e-07	2.23049e-07	2.2669e-07	2.26236e-07	2.26462e-07	2.27021e-07	2.24486e-07
1274.15	16.26	1.41215e-08	1.0994e-08	1.62741e-08	1.04167e-08	1.90422e-08	1.31753e-08	1.76152e-08	9.10353e-09	1.35655e-08
1290.9	16.26	1.56691e-06	1.54991e-06	1.56058e-06	1.56761e-06	1.56783e-06	1.57032e-06	1.56631e-06	1.56104e-06	1.55254e-06
1307.65	16.26	1.61451e-06	1.54518e-06	1.41926e-06	1.61285e-06	1.54864e-06	1.43345e-06	1.60257e-06	1.5421e-06	1.41379e-06
1324.4	16.26	2.64031e-06	2.74394e-06	2.91425e-06	2.61311e-06	2.72748e-06	2.88305e-06	2.60835e-06	2.72322e-06	2.87864e-06
1341.16	16.26	2.68408e-06	2.78267e-06	2.76524e-06	2.67986e-06	2.80186e-06	2.84891e-06	2.66136e-06	2.75598e-06	2.80175e-06
1357.91	16.26	1.61813e-07	7.62555e-08	3.57542e-08	1.51973e-07	1.19218e-07	4.80963e-08	1.12425e-07	1.03393e-07	2.19115e-08
1374.87	16.26	2.66525e-07	2.35762e-07	9.05743e-08	2.52858e-07	2.13941e-07	8.39236e-08	2.4616e-07	2.15393e-07	8.63284e-08
1391.65	16.26	3.0564e-08	1.07324e-08	0	0	1.09659e-08	1.63746e-08	1.33144e-09	1.1604e-08	7.30234e-25
1408.49	16.26	8.79431e-25	0	1.36509e-08	4.095e-10	0	0	0	0	0
1425.33	16.26	5.72216e-05	5.28746e-05	4.96799e-05	5.7933e-05	5.31615e-05	4.94529e-05	5.75966e-05	5.30378e-05	4.93335e-05
1442.17	16.26	0.000163862	0.000156911	0.000138796	0.000158222	0.000151984	0.000136184	0.000159766	0.000153103	0.000135789
1459.01	16.26	1.86793e-06	1.7397e-06	1.55378e-06	1.30167e-06	1.20252e-06	1.06856e-06	1.47208e-06	1.35896e-06	1.22275e-06
1475.85	16.26	9.68221e-06	9.0562e-06	8.08769e-06	9.82236e-06	9.20517e-06	8.26287e-06	9.73184e-06	9.1301e-06	8.1388e-06
1492.7	16.26	2.41207e-06	2.50165e-06	2.65077e-06	2.34315e-06	2.43952e-06	2.58235e-06	2.36738e-06	2.45395e-06	2.60435e-06
1509.54	16.26	8.5688e-08	7.64572e-08	6.69063e-08	5.98198e-08	6.00026e-08	6.24914e-08	5.69153e-08	5.80643e-08	5.93748e-08
1526.38	16.26	9.5033e-06	9.5929e-06	9.7754e-06	8.88471e-06	8.96572e-06	9.11543e-06	9.10102e-06	9.18293e-06	9.35151e-06
1543.22	16.26	2.02961e-05	2.02628e-05	2.02091e-05	2.06637e-05	2.06526e-05	2.06092e-05	2.04011e-05	2.03685e-05	2.03311e-05
1560.06	16.26	1.94953e-06	1.94938e-06	1.95133e-06	1.58473e-06	1.58689e-06	1.58428e-06	1.72654e-06	1.73012e-06	1.73011e-06
1576.9	16.26	0.000173732	0.00017372	0.000173689	0.000175849	0.00017585	0.000175806	0.000174083	0.000174068	0.000174027
1593.71	16.26	3.35198e-05	3.35385e-05	3.35984e-05	3.22388e-05	3.22622e-05	3.23197e-05	3.26371e-05	3.26712e-05	3.27292e-05
1610.39	16.26	0.000135945	0.000135945	0.000135914	0.000137162	0.000137175	0.000137149	0.000135982	0.000135982	0.000135968
1627.13	16.26	5.16426e-06	5.16512e-06	5.18079e-06	4.47562e-06	4.48183e-06	4.47533e-06	4.74842e-06	4.75748e-06	4.7565e-06
1644.01	16.26	2.97029e-05	2.9703e-05	2.97144e-05	3.03504e-05	3.03601e-05	3.03716e-05	2.99397e-05	2.9952e-05	2.99626e-05
1660.89	16.26	4.36807e-06	4.35913e-06	4.35523e-06	3.75014e-06	3.75186e-06	3.75808e-06	3.97176e-06	3.98085e-06	3.96876e-06
1677.77	16.26	4.66463e-07	4.48705e-07	4.52775e-07	3.8303e-07	4.00067e-07	3.91807e-07	4.02375e-07	4.265e-07	4.18809e-07
1694.65	16.26	2.50289e-08	2.77536e-08	3.43149e-08	4.70351e-08	1.5367e-08	3.90818e-08	3.40121e-08	2.02603e-08	2.85941e-08
1711.53	16.26	1.58797e-08	2.0725e-08	1.46249e-08	1.78329e-08	1.67781e-08	1.98205e-08	2.22487e-08	2.25063e-08	2.4278e-08
1728.41	16.26	7.42509e-09	8.14824e-09	1.64426e-09	1.40122e-08	0	3.76464e-09	9.57188e-25	7.31005e-09	1.92069e-08
1745.28	16.26	3.60509e-09	0	0	0	0	0	0	0	0
1762.16	16.26	2.34019e-07	2.48107e-07	2.58928e-07	1.65913e-07	1.59563e-07	1.7647e-07	2.11027e-07	2.00322e-07	2.15715e-07
1778.85	16.26	6.89447e-08	3.9186e-08	4.83774e-08	3.66524e-08	2.00864e-08	2.70474e-08	3.526e-08	2.83268e-08	3.37788e-08
1795.43	16.26	1.70775e-07	1.75619e-07	1.80124e-07	1.30739e-07	1.37339e-07	1.56015e-07	1.38721e-07	1.25691e-07	2.09585e-07
1812.02	16.26	3.59582e-08	1.93421e-08	1.86211e-07	1.16956e-08	1.72125e-08	-1.43244e-26	2.96243e-08	3.48123e-08	7.07851e-09
1828.82	16.26	0	0	0	0	1.54497e-10	0	0	1.54528e-09	0
1845.62	16.26	0	0	0	0	0	0	0	0	0
1862.42	16.26	1.41369e-08	7.21817e-08	2.38038e-08	6.7162e-09	9.77906e-09	1.96085e-08	7.44905e-09	7.05924e-09	1.67832e-08
1880.13	16.26	4.97971e-05	4.62564e-05	2.27824e-05	5.08003e-05	4.67831e-05	1.89667e-05	5.01197e-05	4.61809e-05	2.11049e-05
1896.11	16.26	6.52603e-06	6.98034e-06	3.26168e-06	6.09605e-06	6.86303e-06	2.84745e-06	6.24358e-06	6.80685e-06	2.9089e-06
1912.97	16.26	9.80195e-07	6.97952e-07	3.16784e-07	8.09152e-07	5.47341e-07	1.80075e-07	7.86573e-07	5.87229e-07	2.61822e-07
1929.93	16.26	2.8345e-06	3.50803e-06	3.71311e-06	1.91225e-06	2.52023e-06	3.04467e-06	2.18966e-06	2.90471e-06	3.22826e-06
1946.82	16.26	0.000580376	0.000641115	0.00070024	0.000529436	0.000592285	0.000669026	0.000549729	0.000610824	0.000677844
1963.72	16.26	0.00104876	0.001019	0.000982403	0.00106859	0.00104117	0.00100868	0.00105399	0.00102534	0.000989898
1980.61	16.26	0.000129063	0.000128537	0.000125153	0.000119197	0.000119257	0.000117081	0.000123021	0.000122799	0.000120076
1997.51	16.26	0.000555885	0.000560277	0.000568394	0.000529135	0.000533862	0.000542187	0.000540792	0.000545385	0.000553661
2014.4	16.26	0.00235074	0.0023498	0.00234508	0.00232285	0.0023221	0.00231924	0.0023262	0.00232545	0.00232154
2031.3	16.26	0.000411934	0.000411041	0.000409582	0.000365747	0.000365251	0.000364306	0.000384081	0.00038343	0.000382268
2048.13	16.26	0.000590143	0.000592371	0.000596061	0.000586648	0.000588344	0.000591258	0.000585959	0.000587863	0.000591209
2064.9	16.26	0.000769393	0.000769975	0.000770989	0.00078714	0.000787889	0.000789156	0.000775309	0.000775982	0.00077711
2081.61	16.26	0.00037962	0.000378645	0.000376916	0.00034243	0.000341497	0.000339829	0.000357253	0.000356299	0.000354623
2098.45	16.26	9.12074e-05	9.12555e-05	9.12682e-05	7.83331e-05	7.82985e-05	7.82854e-05	8.32635e-05	8.3302e-05	8.32441e-05
2115.29	16.26	2.17116e-05	2.16608e-05	2.15673e-05	2.02373e-05	2.021e-05	2.00983e-05	2.05996e-05	2.05763e-05	2.04742e-05
2132.13	16.26	2.32112e-06	2.30044e-06	2.31043e-06	1.87587e-06	1.90114e-06	1.89815e-06	2.11395e-06	2.12336e-06	2.13278e-06
2148.97	16.26	1.26336e-05	1.25943e-05	1.25084e-05	1.28057e-05	1.27567e-05	1.26408e-05	1.26565e-05	1.26236e-05	1.25241e-05
2165.81	16.26	1.07663e-05	1.07292e-05	1.07155e-05	1.0627e-05	1.06213e-05	1.05941e-05	1.06339e-05	1.0623e-05	1.05998e-05
2182.64	16.26	1.11447e-06	1.12712e-06	1.13885e-06	1.04685e-06	1.02869e-06	1.04724e-06	1.07374e-06	1.07882e-06	1.09109e-06
2199.48	16.26	2.91161e-07	3.19411e-07	3.10579e-07	2.23345e-07	2.19205e-07	2.35638e-07	2.57842e-07	2.23655e-07	2.76857e-07
2216.32	16.26	2.55239e-07	2.45032e-07	2.2005e-07	2.69854e-07	2.38263e-07	2.36462e-07	2.02367e-07	2.88114e-07	2.5601e-07
2233.16	16.26	1.02335e-07	1.06222e-07	7.66143e-08	6.66135e-08	8.38751e-08	7.15136e-08	1.06706e-07	7.48137e-08	7.26336e-08
2250	16.26	1.52768e-07	1.47513e-07	1.48947e-07	1.45897e-07	1.66517e-07	1.47107e-07	1.57082e-07	1.50164e-07	1.41102e-07
2266.84	16.26	3.5023e-08	7.76561e-08	6.2849e-08	6.73307e-08	4.56399e-08	7.96029e-08	3.61845e-08	3.6756e-08	3.08037e-08
2283.67	16.26	2.81172e-08	6.74752e-08	4.62256e-08	1.54352e-08	2.05406e-08	2.14205e-08	3.67525e-08	5.78851e-08	5.19778e-08
2300.51	16.26	1.15836e-08	0	0	2.03609e-08	0	3.27587e-09	1.40566e-08	0	6.36479e-09
2317.35	16.26	0	1.56508e-08	0	7.13197e-09	5.26736e-09	0	0	8.15579e-09	0
2334.19	16.26	0	1.06489e-08	0	0	0	0	0	0	0
2350.4	16.26	0	0	0	0	0	0	0	0	0
2366.68	16.26	0	0	0	0	0	0	6.82623e-09	0	4.86624e-09
2384.12	16.26	0	0	0	0	0	0	4.54494e-09	2.3307e-08	2.14012e-08
2400.81	16.26	0	0	6.21784e-09	0	0	0	0	1.49017e-08	0
2417.5	16.26	0	0	0	0	0	1.36111e-08	0	1.77136e-08	1.18551e-08
2434.19	16.26	0	9.61277e-09	0	1.64445e-08	0	0	1.44375e-08	0	1.11166e-09
2450.88	16.26	0	0	3.70373e-10	0	2.43555e-08	4.33443e-08	0	1.14296e-08	0
2467.57	16.26	9.36125e-08	3.99051e-08	6.09535e-08	4.28679e-08	2.80284e-08	1.05657e-07	7.41853e-08	2.48039e-08	3.46749e-08
2484.32	16.26	3.44548e-06	3.03195e-06	2.24704e-06	2.63795e-06	2.32057e-06	1.74391e-06	2.9207e-06	2.57938e-06	1.89449e-06
2501.08	16.26	1.74132e-06	1.82639e-06	1.86382e-06	1.56914e-06	1.58604e-06	1.68597e-06	1.58854e-06	1.60448e-06	1.67717e-06

## Sheet: k_ZY1F
Wavelength	FWHM	k_Summer_L	k_Summer_M	k_Summer_H	k_Winter_L	k_Winter_M	k_Winter_H	k_1976_L	k_1976_M	k_1976_H
1009.7	16.848	0	0	0	0	0	0	0	0	0
1026.55	16.846	0	0	0	0	0	0	0	0	0
1043.4	16.846	6.5479e-07	6.47881e-07	6.45782e-07	6.59245e-07	6.67801e-07	6.69266e-07	6.51322e-07	6.51159e-07	6.51305e-07
1060.24	16.849	3.87366e-07	3.79985e-07	3.76974e-07	3.80231e-07	3.6996e-07	3.74319e-07	3.75348e-07	3.79124e-07	3.70434e-07
1077.09	16.845	2.76945e-08	3.01662e-08	3.22321e-08	2.27556e-08	1.88004e-08	2.71946e-08	2.5647e-08	2.34745e-08	3.04663e-08
1093.94	16.845	1.19909e-09	1.74825e-09	1.28117e-09	0	1.55796e-09	-1.07319e-09	6.24258e-10	1.5992e-09	0
1110.78	16.848	7.02475e-10	0	1.39949e-09	1.07082e-09	0	7.84168e-25	0	0	0
1127.63	16.848	0	0	0	9.39915e-10	0	0	0	0	0
1144.48	16.845	0	0	0	0	0	0	0	0	0
1161.32	16.849	0	0	0	0	0	0	0	0	0
1178.17	16.845	0	0	0	0	0	0	0	1.61048e-09	0
1195.02	16.848	3.18119e-07	3.03246e-07	2.76409e-07	2.88818e-07	2.78053e-07	2.55445e-07	3.02423e-07	2.86585e-07	2.64974e-07
1211.86	16.845	2.44426e-05	2.41154e-05	2.38307e-05	2.45366e-05	2.4204e-05	2.39222e-05	2.43735e-05	2.40451e-05	2.37673e-05
1228.71	16.848	8.05022e-06	8.06849e-06	8.08368e-06	7.91157e-06	7.92776e-06	7.93755e-06	7.9268e-06	7.93654e-06	7.94203e-06
1245.56	16.848	2.45234e-07	2.40705e-07	2.4238e-07	2.36135e-07	2.33609e-07	2.31265e-07	2.32862e-07	2.37109e-07	2.33842e-07
1262.4	16.846	2.17348e-07	2.15521e-07	2.19236e-07	2.16268e-07	2.18092e-07	2.26963e-07	2.22602e-07	2.13061e-07	2.01605e-07
1279.25	16.845	3.74732e-08	3.16042e-08	3.30175e-08	2.83275e-08	2.55596e-08	3.16049e-08	2.88358e-08	2.50341e-08	2.47045e-08
1296.09	16.849	1.39394e-06	1.40608e-06	1.43642e-06	1.41052e-06	1.41935e-06	1.43772e-06	1.39694e-06	1.4036e-06	1.43481e-06
1312.94	16.845	4.52181e-06	4.43278e-06	4.27129e-06	4.5934e-06	4.50732e-06	4.35511e-06	4.54239e-06	4.45676e-06	4.30029e-06
1329.79	16.846	8.22923e-07	8.31387e-07	8.07492e-07	7.52328e-07	7.49054e-07	7.48443e-07	7.71087e-07	7.7852e-07	7.67504e-07
1346.63	16.848	2.11212e-06	2.52885e-06	2.91516e-06	2.09251e-06	2.60807e-06	2.99249e-06	2.08995e-06	2.556e-06	2.9214e-06
1363.48	16.848	7.94201e-08	8.17931e-08	1.75901e-08	1.12203e-07	3.48677e-08	2.19852e-08	1.07431e-07	7.28863e-08	1.90294e-08
1380.33	16.845	1.6243e-07	1.45724e-07	5.95231e-08	1.52668e-07	1.53219e-07	3.678e-08	1.71865e-07	1.50926e-07	3.64741e-08
1397.17	16.848	6.5819e-11	0	0	1.22014e-08	0	0	0	0	3.48165e-09
1414.02	16.848	1.85321e-09	1.1043e-08	-1.36426e-09	4.26646e-09	0	1.07831e-08	3.44607e-09	0	3.95736e-10
1430.87	16.845	0.000168984	0.000153949	0.000130385	0.000173101	0.000158096	0.000134274	0.000170812	0.000155787	0.000131688
1447.71	16.846	6.51225e-05	6.05851e-05	5.27765e-05	5.91704e-05	5.5378e-05	4.87312e-05	6.13242e-05	5.71921e-05	4.98865e-05
1464.56	16.846	2.31804e-06	2.02371e-06	1.54344e-06	2.20285e-06	1.96439e-06	1.47175e-06	2.23214e-06	1.95949e-06	1.52253e-06
1481.41	16.846	5.84559e-06	5.47329e-06	5.03944e-06	5.81233e-06	5.44094e-06	4.97564e-06	5.81076e-06	5.43628e-06	4.99863e-06
1498.25	16.849	2.22405e-06	2.23016e-06	2.26302e-06	2.19099e-06	2.20572e-06	2.23117e-06	2.19541e-06	2.20029e-06	2.23996e-06
1515.1	16.844	8.83468e-08	9.6291e-08	8.83377e-08	6.95449e-08	5.84317e-08	6.83707e-08	6.25742e-08	7.44939e-08	7.48163e-08
1531.94	16.848	2.33465e-05	2.34607e-05	2.36993e-05	2.32402e-05	2.33429e-05	2.35291e-05	2.31585e-05	2.327e-05	2.34867e-05
1548.79	16.848	7.51146e-06	7.4819e-06	7.46414e-06	7.3685e-06	7.36783e-06	7.34214e-06	7.38762e-06	7.37203e-06	7.36126e-06
1565.64	16.846	6.5708e-05	6.57491e-05	6.58243e-05	6.44708e-05	6.45033e-05	6.4585e-05	6.47135e-05	6.47477e-05	6.48191e-05
1582.49	16.845	9.04483e-05	9.04167e-05	9.03603e-05	9.02117e-05	9.01775e-05	9.01347e-05	8.9867e-05	8.9852e-05	8.97923e-05
1599.33	16.848	0.00010247	0.00010253	0.000102701	0.000104027	0.000104103	0.000104264	0.000102894	0.000102962	0.000103132
1616.18	16.846	6.59238e-05	6.59267e-05	6.58815e-05	6.29377e-05	6.29425e-05	6.29134e-05	6.39125e-05	6.38867e-05	6.38794e-05
1633.03	16.846	7.85022e-06	7.85395e-06	7.84569e-06	7.58545e-06	7.59572e-06	7.56473e-06	7.66377e-06	7.66657e-06	7.66334e-06
1649.87	16.848	2.41831e-05	2.42051e-05	2.42195e-05	2.45831e-05	2.45923e-05	2.4617e-05	2.4325e-05	2.4342e-05	2.43549e-05
1666.72	16.845	2.16722e-06	2.16599e-06	2.17152e-06	1.79402e-06	1.79799e-06	1.80409e-06	1.92687e-06	1.93126e-06	1.94096e-06
1683.56	16.849	2.00245e-07	1.815e-07	1.94936e-07	1.79856e-07	1.69768e-07	1.74577e-07	1.87061e-07	1.72021e-07	1.76086e-07
1700.41	16.845	1.53806e-08	1.87342e-08	1.83484e-08	2.48493e-08	1.24039e-08	1.08705e-08	2.03862e-08	2.41546e-08	2.30399e-08
1717.26	16.846	2.89473e-08	1.30811e-08	2.3812e-08	2.07239e-08	3.04008e-09	1.60872e-08	1.00466e-08	9.6311e-09	2.15797e-08
1734.1	16.849	2.99185e-09	1.27272e-08	7.74644e-09	0	0	0	1.12039e-24	0	1.10585e-24
1750.95	16.845	1.3801e-07	1.45791e-07	1.40559e-07	1.00459e-07	9.62649e-08	9.68981e-08	1.16589e-07	1.17096e-07	1.24723e-07
1767.8	16.845	1.5406e-07	1.52428e-07	1.87816e-07	1.04563e-07	9.7857e-08	8.69791e-08	9.88903e-08	1.14268e-07	9.63908e-08
1784.64	16.849	1.56297e-07	1.59619e-07	1.45233e-07	1.04796e-07	1.23398e-07	9.24795e-08	1.26626e-07	1.15441e-07	1.36829e-07
1801.49	16.845	1.04021e-07	9.18375e-08	1.56662e-07	6.88536e-08	5.05646e-08	7.13199e-08	9.38894e-08	9.49585e-08	7.73805e-08
1818.34	16.846	3.44688e-08	6.31073e-10	8.0123e-09	1.6432e-08	0	8.97442e-24	2.80799e-08	6.20509e-08	0
1835.18	16.849	0	0	0	0	0	0	0	0	0
1852.03	16.846	0	0	0	0	0	0	0	0	0
1868.88	16.845	1.04423e-06	5.36483e-07	9.71877e-07	9.61064e-07	3.61125e-07	8.21875e-07	9.20775e-07	4.47133e-07	8.61547e-07
1885.72	16.848	3.76269e-05	3.42239e-05	1.88744e-05	3.77777e-05	3.40468e-05	1.6146e-05	3.75366e-05	3.39151e-05	1.75098e-05
1902.57	16.845	2.29677e-06	2.51005e-06	7.62555e-07	1.96817e-06	2.14418e-06	5.65482e-07	1.9788e-06	2.26182e-06	6.88832e-07
1919.41	16.848	7.37165e-07	6.30506e-07	3.57306e-07	5.05261e-07	4.71102e-07	2.02791e-07	5.98892e-07	5.34305e-07	2.50027e-07
1936.26	16.849	6.19027e-05	9.09909e-05	0.000133666	4.67947e-05	6.71515e-05	0.000100235	5.28198e-05	7.66393e-05	0.000113524
1953.11	16.845	0.00108358	0.00109286	0.00106977	0.0010468	0.00106919	0.00107644	0.00105906	0.00107471	0.00106513
1969.96	16.845	0.000629055	0.000613803	0.000593642	0.00062864	0.000615009	0.000598	0.000626128	0.000611805	0.000592799
1986.8	16.846	6.23241e-05	6.16922e-05	6.02766e-05	5.47829e-05	5.42417e-05	5.31172e-05	5.76587e-05	5.70838e-05	5.57746e-05
2003.65	16.846	0.00197301	0.00199167	0.00201075	0.00190983	0.0019318	0.00195578	0.00193455	0.00195475	0.00197622
2020.49	16.848	0.00128621	0.00128002	0.00126847	0.00119799	0.00119143	0.00117974	0.00123297	0.00122641	0.00121468
2037.34	16.846	0.000309923	0.000309241	0.0003083	0.000291943	0.000291401	0.000290525	0.00029817	0.000297531	0.000296629
2054.19	16.848	0.000840379	0.000839738	0.000838128	0.000859781	0.00085944	0.000858469	0.00084748	0.00084695	0.000845601
2071.03	16.845	0.00072007	0.000719778	0.000719122	0.000700542	0.000700321	0.000699742	0.000706233	0.000705996	0.00070539
2087.88	16.846	0.000270776	0.000270712	0.000270566	0.000237132	0.000237139	0.00023716	0.000250483	0.000250461	0.000250404
2104.73	16.846	4.48576e-05	4.46018e-05	4.41773e-05	4.01145e-05	3.98437e-05	3.94145e-05	4.17552e-05	4.14982e-05	4.10678e-05
2121.57	16.849	9.62968e-06	9.62619e-06	9.61e-06	8.37683e-06	8.40196e-06	8.38951e-06	8.80497e-06	8.84029e-06	8.82398e-06
2138.42	16.845	2.73321e-06	2.71904e-06	2.72314e-06	2.47988e-06	2.50475e-06	2.48422e-06	2.56677e-06	2.56595e-06	2.58262e-06
2155.27	16.848	1.41453e-05	1.41286e-05	1.40833e-05	1.45212e-05	1.45098e-05	1.44668e-05	1.42953e-05	1.42658e-05	1.424e-05
2172.11	16.846	5.66918e-06	5.70139e-06	5.73888e-06	5.4652e-06	5.48105e-06	5.51755e-06	5.5622e-06	5.56695e-06	5.60254e-06
2188.96	16.846	7.71301e-07	8.04274e-07	8.17646e-07	7.24372e-07	7.16603e-07	7.16114e-07	7.50922e-07	7.20527e-07	7.72919e-07
2205.81	16.845	1.90562e-07	1.86249e-07	2.01804e-07	1.7679e-07	1.53091e-07	1.85663e-07	1.6223e-07	1.93149e-07	1.9887e-07
2222.65	16.85	1.87039e-07	2.22319e-07	1.56664e-07	1.72666e-07	1.78074e-07	1.75347e-07	1.71008e-07	2.06377e-07	1.88725e-07
2239.5	16.846	4.87868e-08	2.85011e-08	3.12936e-08	3.3382e-08	5.51617e-08	3.65155e-08	3.29665e-08	3.64764e-08	1.48966e-08
2256.35	16.845	1.56939e-07	1.82035e-07	1.53123e-07	1.69312e-07	1.77691e-07	1.77125e-07	1.76531e-07	1.5352e-07	1.81855e-07
2273.19	16.846	4.8766e-08	8.79738e-08	6.21486e-08	4.03384e-08	2.6863e-08	4.5697e-08	6.34621e-08	6.22825e-08	5.61899e-08
2290.04	16.848	2.58054e-08	5.58646e-09	3.24219e-08	1.8855e-08	4.59457e-09	2.25446e-08	4.34571e-08	0	5.0917e-08
2306.89	16.845	0	0	0	1.95732e-08	1.14547e-08	1.26761e-08	0	0	2.2073e-08
2323.73	16.848	0	0	0	0	7.95705e-09	0	0	0	0
2340.58	16.846	3.6863e-09	0	0	0	0	0	0	0	0
2357.43	16.848	0	0	0	0	0	0	6.46887e-09	0	0
2374.27	16.846	0	3.22914e-08	0	0	0	0	0	0	0
2391.12	16.845	0	0	1.25496e-09	0	0	0	0	0	0
2407.96	16.848	0	0	0	1.10947e-08	0	1.72825e-08	1.11735e-08	0	1.2669e-10
2424.81	16.848	0	8.08257e-24	1.84907e-09	1.05501e-08	0	8.84708e-09	0	0	1.76404e-08
2441.66	16.845	1.39013e-08	4.2588e-27	0	1.72831e-08	0	2.86922e-08	2.21256e-08	1.50926e-08	0
2458.5	16.849	8.66937e-09	4.00362e-08	2.1386e-08	0	2.16395e-09	3.41054e-08	2.04744e-08	4.14653e-08	0
2475.35	16.845	3.69629e-07	3.38598e-07	1.19791e-07	2.80947e-07	1.88319e-07	2.00932e-07	2.66456e-07	2.71942e-07	9.59849e-08
2492.2	16.846	3.54732e-06	3.54221e-06	3.7202e-06	2.94099e-06	2.91374e-06	2.9704e-06	3.11722e-06	3.14589e-06	3.19468e-06
2509.04	16.849	1.43071e-06	1.3439e-06	1.32858e-06	1.24582e-06	1.32806e-06	1.27148e-06	1.41685e-06	1.28304e-06	1.27042e-06

## Sheet: k_GF5B
Wavelength	FWHM	k_Summer_L	k_Summer_M	k_Summer_H	k_Winter_L	k_Winter_M	k_Winter_H	k_1976_L	k_1976_M	k_1976_H
1009	8.546	0	0	0	0	0	0	0	0	0
1017.42	8.546	0	0	0	0	0	0	0	0	0
1025.83	8.546	0	0	0	0	0	0	0	0	0
1034.25	8.546	2.66813e-07	2.65391e-07	2.65449e-07	2.69228e-07	2.67959e-07	2.75541e-07	2.67326e-07	2.66725e-07	2.69163e-07
1042.67	8.546	2.73331e-07	2.63827e-07	2.57175e-07	2.51348e-07	2.65672e-07	2.68551e-07	2.65549e-07	2.64514e-07	2.636e-07
1051.08	8.546	1.57026e-06	1.57439e-06	1.56965e-06	1.61639e-06	1.61883e-06	1.61073e-06	1.57452e-06	1.58005e-06	1.57579e-06
1059.5	8.546	1.45935e-07	1.34559e-07	1.34257e-07	1.36934e-07	1.1885e-07	1.2396e-07	1.27496e-07	1.33719e-07	1.24772e-07
1067.92	8.546	2.28084e-07	2.23149e-07	2.20328e-07	2.18133e-07	2.20564e-07	2.3102e-07	2.22341e-07	2.17082e-07	2.18561e-07
1076.33	8.546	2.99923e-08	3.24832e-08	3.52046e-08	2.87785e-08	2.0512e-08	2.93813e-08	3.01071e-08	2.47032e-08	3.7765e-08
1084.75	8.546	1.2096e-09	-2.46039e-26	1.85398e-09	0	0	0	0	1.9669e-09	0
1093.17	8.546	2.39341e-09	2.88579e-09	2.48572e-09	0	2.61539e-09	-2.06044e-09	1.10155e-09	2.92044e-09	0
1101.58	8.546	0	0	0	0	0	0	0	0	0
1110	8.546	7.68823e-10	0	0	0	0	3.71643e-25	0	0	0
1118.42	8.546	9.88134e-10	0	8.31912e-09	4.80974e-09	0	0	0	0	0
1126.83	8.546	0	0	0	0	0	0	0	0	0
1135.25	8.546	0	0	0	1.20891e-09	0	0	0	0	0
1143.67	8.546	0	0	0	0	0	0	0	0	0
1152.08	8.546	0	0	0	0	0	0	0	0	0
1160.5	8.546	0	0	0	0	0	0	0	0	0
1168.92	8.546	0	0	0	0	0	0	0	0	0
1177.33	8.546	0	0	0	0	0	0	0	2.40909e-09	0
1185.75	8.546	0	0	0	0	0	0	0	0	0
1194.17	8.546	0	0	0	0	0	0	1.24996e-09	0	0
1202.58	8.546	2.57715e-05	2.52028e-05	2.47753e-05	2.61619e-05	2.55879e-05	2.51932e-05	2.58893e-05	2.53132e-05	2.49156e-05
1211	8.546	1.75765e-05	1.73002e-05	1.7035e-05	1.72714e-05	1.70198e-05	1.6756e-05	1.72956e-05	1.70256e-05	1.67675e-05
1219.42	8.546	2.64548e-05	2.66126e-05	2.68349e-05	2.70809e-05	2.72408e-05	2.7504e-05	2.6684e-05	2.68537e-05	2.70868e-05
1227.83	8.546	6.54518e-06	6.55972e-06	6.57817e-06	6.05328e-06	6.06537e-06	6.0784e-06	6.21265e-06	6.2163e-06	6.21839e-06
1236.25	8.546	1.15468e-06	1.15507e-06	1.15366e-06	1.09757e-06	1.10351e-06	1.10255e-06	1.13268e-06	1.12897e-06	1.12862e-06
1244.67	8.546	1.08247e-07	9.47918e-08	1.03228e-07	9.53171e-08	9.15488e-08	8.71357e-08	8.80327e-08	9.6965e-08	9.11221e-08
1253.08	8.546	2.3026e-07	2.28054e-07	2.34747e-07	2.28648e-07	2.41914e-07	2.29962e-07	2.40298e-07	2.26762e-07	2.24852e-07
1261.5	8.546	2.55351e-07	2.45319e-07	2.48299e-07	2.4256e-07	2.42896e-07	2.60748e-07	2.48631e-07	2.49599e-07	2.34158e-07
1269.92	8.546	6.40039e-08	7.40403e-08	6.65723e-08	7.61569e-08	6.65789e-08	7.54939e-08	7.21833e-08	5.98157e-08	5.79707e-08
1278.33	8.546	0	0	0	0	4.45911e-09	0	0	0	0
1286.75	8.546	8.07499e-07	7.95637e-07	7.97978e-07	7.52646e-07	7.47544e-07	7.57764e-07	7.65071e-07	7.53957e-07	7.50718e-07
1295.17	8.546	1.80722e-06	1.80051e-06	1.81068e-06	1.85379e-06	1.85386e-06	1.85872e-06	1.82934e-06	1.82553e-06	1.83133e-06
1303.58	8.546	2.85907e-08	2.93158e-08	3.38249e-08	3.35329e-08	1.7667e-08	1.66245e-08	2.84429e-08	1.79395e-08	3.65226e-08
1312	8.546	4.15599e-06	4.05692e-06	3.87422e-06	4.16716e-06	4.07501e-06	3.90599e-06	4.14462e-06	4.04579e-06	3.87778e-06
1320.42	8.546	5.38792e-06	5.42176e-06	5.48228e-06	5.40487e-06	5.46633e-06	5.52098e-06	5.36036e-06	5.41308e-06	5.46558e-06
1328.83	8.546	9.19089e-08	1.24011e-07	8.74398e-08	5.55066e-08	6.26883e-08	7.18979e-08	6.99078e-08	9.31392e-08	7.90982e-08
1337.25	8.546	2.70787e-06	2.6475e-06	2.5159e-06	2.72292e-06	2.68321e-06	2.54398e-06	2.69708e-06	2.63749e-06	2.51869e-06
1345.66	8.546	2.17572e-06	2.46773e-06	2.91028e-06	2.12191e-06	2.48288e-06	2.89961e-06	2.13177e-06	2.45575e-06	2.8517e-06
1354.08	8.546	1.76384e-07	8.72847e-08	5.70659e-08	1.29904e-07	1.62247e-07	1.51535e-07	1.6093e-07	2.47608e-07	5.30848e-08
1362.5	8.546	1.01005e-08	7.8881e-08	0	1.18275e-07	1.54338e-08	6.18016e-09	1.17759e-08	9.26436e-09	1.48576e-08
1370.91	8.546	3.30597e-07	1.60954e-07	8.22864e-08	2.43315e-07	1.06183e-07	7.82114e-08	3.29412e-07	1.87404e-07	4.52865e-08
1379.33	8.546	1.63614e-07	1.75695e-07	6.77839e-08	1.78949e-07	1.8899e-07	3.92645e-08	1.82491e-07	1.77264e-07	4.98577e-08
1387.75	8.546	1.56659e-08	9.45613e-10	1.37387e-09	0	0	0	3.30183e-08	2.30793e-09	0
1396.16	8.546	0	0	0	1.49372e-09	0	0	0	0	0
1404.58	8.546	0	0	0	2.01239e-08	0	0	0	0	8.36492e-09
1413	8.546	0	0	-2.75871e-09	0	0	0	0	0	0
1421.41	8.546	2.31076e-08	4.56642e-08	1.08638e-08	1.0882e-08	2.38366e-08	2.59214e-08	1.27718e-08	3.00213e-08	1.89664e-08
1429.83	8.546	0.000146588	0.000116783	8.90999e-05	0.000151146	0.000122012	9.30354e-05	0.000149005	0.000119583	9.0852e-05
1438.25	8.546	0.000274924	0.000275118	0.000255657	0.000274973	0.00027553	0.000259647	0.000273388	0.000273447	0.000254677
1446.66	8.546	6.87337e-05	6.85127e-05	6.53556e-05	5.93115e-05	5.95642e-05	5.73589e-05	6.29817e-05	6.30006e-05	6.02711e-05
1455.08	8.546	3.63389e-06	3.34806e-06	2.9791e-06	2.54234e-06	2.35023e-06	2.06556e-06	2.87812e-06	2.65976e-06	2.36941e-06
1463.5	8.546	1.82157e-07	1.71975e-07	1.40397e-07	1.00777e-07	1.39638e-07	9.35125e-08	1.19268e-07	1.10661e-07	1.1951e-07
1471.91	8.546	1.08789e-05	1.00093e-05	8.29134e-06	1.10885e-05	1.02712e-05	8.54206e-06	1.09357e-05	1.01357e-05	8.42426e-06
1480.33	8.546	7.92865e-06	7.76444e-06	7.58818e-06	7.8617e-06	7.69086e-06	7.4927e-06	7.86043e-06	7.6738e-06	7.5266e-06
1488.75	8.546	1.04975e-06	9.80798e-07	9.28038e-07	8.84863e-07	8.53287e-07	8.029e-07	9.60911e-07	9.146e-07	8.63471e-07
1497.16	8.546	3.59268e-06	3.63985e-06	3.7233e-06	3.58304e-06	3.62627e-06	3.69902e-06	3.57678e-06	3.60985e-06	3.68825e-06
1505.58	8.546	1.41884e-07	1.34534e-07	1.29202e-07	1.20452e-07	1.23326e-07	1.29903e-07	1.2645e-07	1.15658e-07	1.4935e-07
1514	8.546	1.4682e-08	3.77335e-08	1.90398e-08	1.56038e-08	1.47445e-08	7.99615e-09	4.01215e-09	1.98231e-08	2.07349e-08
1522.41	8.546	1.5676e-06	1.56566e-06	1.56446e-06	1.27648e-06	1.27308e-06	1.27663e-06	1.369e-06	1.39048e-06	1.38543e-06
1530.83	8.546	2.17285e-05	2.18326e-05	2.20694e-05	2.09667e-05	2.10511e-05	2.12352e-05	2.11938e-05	2.12944e-05	2.15017e-05
1539.25	8.546	3.36715e-05	3.36527e-05	3.36166e-05	3.49211e-05	3.49214e-05	3.48865e-05	3.42051e-05	3.41875e-05	3.41619e-05
1547.66	8.546	3.80695e-06	3.77767e-06	3.77288e-06	3.44454e-06	3.44421e-06	3.42493e-06	3.56576e-06	3.55198e-06	3.54801e-06
1556.08	8.546	3.24237e-07	3.17197e-07	3.30347e-07	3.14357e-07	3.08493e-07	3.0588e-07	3.03975e-07	3.11964e-07	3.1817e-07
1564.5	8.546	6.54423e-06	6.5554e-06	6.5579e-06	5.28743e-06	5.30154e-06	5.3164e-06	5.80141e-06	5.80085e-06	5.80409e-06
1572.91	8.546	0.000210196	0.000210227	0.000210234	0.000213273	0.000213272	0.000213309	0.000210894	0.000210909	0.000210928
1581.33	8.546	0.000127238	0.000127163	0.000127044	0.00012665	0.000126589	0.000126482	0.00012629	0.000126234	0.00012611
1589.75	8.546	3.91028e-06	3.90599e-06	3.88082e-06	3.12518e-06	3.11127e-06	3.10223e-06	3.41768e-06	3.43097e-06	3.41286e-06
1598.16	8.546	8.65784e-05	8.66372e-05	8.68109e-05	8.46778e-05	8.47487e-05	8.48985e-05	8.5126e-05	8.51866e-05	8.53504e-05
1606.58	8.546	0.000176578	0.00017656	0.00017648	0.000183528	0.000183518	0.000183455	0.000179644	0.000179603	0.000179555
1615	8.546	6.91478e-05	6.91822e-05	6.92254e-05	6.43966e-05	6.4448e-05	6.44961e-05	6.61173e-05	6.61201e-05	6.62126e-05
1623.41	8.546	6.31449e-06	6.32705e-06	6.32088e-06	4.93667e-06	4.94469e-06	4.94295e-06	5.5285e-06	5.53474e-06	5.52939e-06
1631.83	8.546	4.1132e-06	4.1332e-06	4.12991e-06	4.11907e-06	4.13169e-06	4.11559e-06	4.09307e-06	4.10312e-06	4.10996e-06
1640.25	8.546	2.99592e-05	2.99731e-05	2.99425e-05	2.9984e-05	2.99857e-05	2.99637e-05	2.98323e-05	2.98403e-05	2.98248e-05
1648.66	8.546	2.88409e-05	2.8855e-05	2.8881e-05	2.97941e-05	2.98112e-05	2.98205e-05	2.92806e-05	2.92838e-05	2.9296e-05
1657.08	8.546	6.16069e-06	6.16252e-06	6.11846e-06	5.35003e-06	5.34267e-06	5.33866e-06	5.64048e-06	5.65827e-06	5.643e-06
1665.5	8.546	2.86251e-06	2.86194e-06	2.87017e-06	2.32811e-06	2.32625e-06	2.34068e-06	2.5525e-06	2.55916e-06	2.56245e-06
1673.91	8.546	7.30127e-07	7.19527e-07	7.35482e-07	6.18741e-07	6.38498e-07	6.31923e-07	6.62401e-07	6.68636e-07	6.86637e-07
1682.33	8.546	2.11356e-07	1.83018e-07	1.96952e-07	1.80369e-07	1.78542e-07	1.73294e-07	1.86828e-07	1.78714e-07	1.79586e-07
1690.75	8.546	5.18275e-08	5.47796e-08	5.2874e-08	5.90604e-08	3.49653e-08	5.98261e-08	7.42775e-08	4.06945e-08	3.76879e-08
1699.16	8.546	1.36105e-08	1.04075e-08	9.4722e-09	2.83356e-08	1.35359e-08	2.98586e-09	1.94144e-08	1.08477e-08	2.16219e-08
1707.58	8.546	3.03911e-08	1.28121e-08	3.37435e-08	1.92445e-08	2.04758e-08	1.73957e-08	1.76061e-08	5.3584e-08	4.59944e-08
1716	8.546	2.81932e-08	1.3693e-08	2.14234e-08	1.01726e-08	8.0302e-25	1.51047e-08	1.20053e-08	2.65533e-09	7.95091e-09
1724.41	8.546	3.03836e-08	1.60313e-08	2.32207e-08	2.07818e-08	0	6.14346e-09	8.44053e-09	0	1.08293e-08
1732.83	8.546	0	8.20688e-09	0	0	0	0	-3.44314e-25	0	0
1741.25	8.546	0	9.63164e-09	7.68093e-09	0	0	0	0	0	0
1749.66	8.546	3.64842e-08	3.91421e-08	4.15137e-08	2.33455e-08	2.53571e-08	2.68011e-08	2.80815e-08	3.16526e-08	3.43823e-08
1758.08	8.546	2.98511e-07	3.08161e-07	3.11898e-07	2.20087e-07	2.08083e-07	2.05805e-07	2.49242e-07	2.60805e-07	2.67861e-07
1766.5	8.546	1.76888e-07	1.73311e-07	2.1744e-07	1.11173e-07	1.06895e-07	9.63444e-08	1.13462e-07	1.1467e-07	1.05945e-07
1774.91	8.546	3.411e-08	3.3753e-08	5.54942e-08	3.23547e-08	2.76982e-08	4.32678e-09	2.63244e-09	1.38888e-08	2.19891e-08
1783.33	8.546	1.21325e-07	1.29755e-07	8.20524e-08	8.63497e-08	8.7255e-08	6.87785e-08	9.92683e-08	8.82763e-08	1.07717e-07
1791.75	8.546	2.1979e-07	1.81949e-07	2.80679e-07	1.37898e-07	1.51044e-07	1.38656e-07	1.75292e-07	1.41572e-07	1.5596e-07
1800.16	8.546	1.10136e-07	1.08438e-07	1.63895e-07	7.92677e-08	2.78626e-08	5.76664e-08	9.78666e-08	9.27973e-08	7.05971e-08
1808.58	8.546	2.82529e-08	3.84635e-08	1.183e-07	1.05062e-08	7.33305e-08	5.39305e-10	2.23236e-08	5.80781e-08	1.28378e-08
1817	8.546	5.86185e-08	0	6.50174e-09	3.18001e-08	0	0	5.09837e-08	1.01548e-07	0
1825.41	8.546	0	1.83201e-09	1.99107e-08	0	0	0	0	0	0
1833.83	8.546	0	0	0	0	0	0	0	0	0
1842.25	8.546	0	0	0	0	0	0	0	0	0
1850.66	8.546	0	0	0	0	0	0	0	0	0
1859.08	8.546	0	0	0	0	6.24327e-09	1.01322e-09	0	0	0
1867.5	8.546	4.57565e-08	3.08277e-08	1.38454e-07	2.56546e-07	1.95604e-08	1.4793e-07	2.51217e-08	2.3799e-08	7.25546e-08
1875.91	8.546	2.34466e-05	1.98299e-05	9.08939e-06	2.41437e-05	2.06969e-05	7.20646e-06	2.38433e-05	2.01356e-05	8.33241e-06
1884.33	8.546	5.12371e-05	4.51923e-05	2.60656e-05	5.12475e-05	4.46113e-05	2.23051e-05	5.10193e-05	4.46937e-05	2.41951e-05
1892.75	8.546	7.04015e-06	5.57355e-06	3.0692e-06	6.38215e-06	5.1275e-06	2.32458e-06	6.62064e-06	5.21746e-06	2.68567e-06
1901.16	8.546	1.77691e-06	1.53738e-06	3.26132e-07	1.47747e-06	1.20345e-06	2.66164e-07	1.47166e-06	1.35427e-06	2.57847e-07
1909.58	8.546	1.44276e-06	1.10966e-06	2.68528e-07	1.16331e-06	9.84092e-07	1.92005e-07	1.11004e-06	1.01176e-06	3.7693e-07
1918	8.546	7.30693e-07	6.04778e-07	3.32892e-07	5.48807e-07	4.26836e-07	1.77482e-07	5.79287e-07	5.45585e-07	2.19603e-07
1926.41	8.546	6.06724e-07	5.66193e-07	3.46917e-07	4.29447e-07	4.45227e-07	1.99809e-07	4.97619e-07	4.74651e-07	2.47638e-07
1934.83	8.546	8.0288e-06	7.6556e-06	6.11174e-06	5.33477e-06	5.2832e-06	4.72314e-06	6.28752e-06	6.06161e-06	5.07458e-06
1943.25	8.546	0.000296957	0.000314636	0.000322899	0.000248255	0.00026291	0.000274168	0.00026811	0.000283832	0.000293217
1951.66	8.546	0.00107315	0.00108111	0.0010617	0.00102959	0.00104982	0.00106171	0.00104484	0.00105881	0.00105384
1960.08	8.546	0.00116705	0.00112224	0.001061	0.00118174	0.00113724	0.00107947	0.00116841	0.00112371	0.0010626
1968.5	8.546	0.000876105	0.000872519	0.000864671	0.000888339	0.000886774	0.000881947	0.000878388	0.000875725	0.000868943
1976.91	8.546	0.000226508	0.000230484	0.000230321	0.000212091	0.000216817	0.000218596	0.000217735	0.000222083	0.000222962
1985.33	8.546	4.08739e-05	4.06062e-05	4.02389e-05	3.589e-05	3.56171e-05	3.53071e-05	3.77574e-05	3.75092e-05	3.71125e-05
1993.75	8.546	0.000193589	0.000192515	0.000191616	0.000176971	0.000176325	0.000175939	0.000183473	0.000182662	0.000182042
2002.16	8.546	0.00265213	0.00264103	0.00262243	0.00261083	0.00260097	0.00258485	0.00262062	0.00260993	0.00259225
2010.58	8.546	0.00274675	0.00273567	0.00271755	0.00278877	0.00277845	0.00276201	0.00275866	0.00274801	0.00273047
2019	8.546	0.00187519	0.0018671	0.00185279	0.00181019	0.00180194	0.00178792	0.00183156	0.0018232	0.00180894
2027.41	8.546	0.000574536	0.000577859	0.000582516	0.000497221	0.000499732	0.000503135	0.000528729	0.00053156	0.000535585
2035.83	8.546	0.000283148	0.000282035	0.000280612	0.0002629	0.000262099	0.000260914	0.000270041	0.000269068	0.000267758
2044.25	8.546	0.000369215	0.000370588	0.000373271	0.000362299	0.000363274	0.000365179	0.000363716	0.000364884	0.000367202
2052.66	8.546	0.00104191	0.00104092	0.0010391	0.00106241	0.00106138	0.00105954	0.00104869	0.00104764	0.00104582
2061.08	8.546	0.000703034	0.000703712	0.000704543	0.000738353	0.000739535	0.000741362	0.000718868	0.000719754	0.000720961
2069.49	8.546	0.000789173	0.000789178	0.000789162	0.0007747	0.000774561	0.000774319	0.000777323	0.000777282	0.000777214
2077.91	8.546	0.00044375	0.000441959	0.000438827	0.000406861	0.00040516	0.0004021	0.000421658	0.000419926	0.000416855
2086.33	8.546	0.000328251	0.000328124	0.000327844	0.000289428	0.000289368	0.00028925	0.000304896	0.000304801	0.000304628
2094.74	8.546	0.00013705	0.00013723	0.000137395	0.000115694	0.000115786	0.00011592	0.00012408	0.000124217	0.000124325
2103.16	8.546	4.73188e-05	4.70677e-05	4.66549e-05	4.19683e-05	4.16986e-05	4.12698e-05	4.38436e-05	4.36274e-05	4.31671e-05
2111.58	8.546	3.09841e-05	3.09044e-05	3.07032e-05	2.95803e-05	2.94825e-05	2.92528e-05	2.989e-05	2.97763e-05	2.9621e-05
2119.99	8.546	1.07079e-05	1.06512e-05	1.05153e-05	9.2771e-06	9.2256e-06	9.11653e-06	9.67117e-06	9.66392e-06	9.52353e-06
2128.41	8.546	2.81197e-06	2.79557e-06	2.81217e-06	2.18669e-06	2.20855e-06	2.19154e-06	2.59647e-06	2.60344e-06	2.60796e-06
2136.83	8.546	1.95643e-06	1.93923e-06	1.92508e-06	1.63389e-06	1.67361e-06	1.65395e-06	1.72933e-06	1.72696e-06	1.74585e-06
2145.24	8.546	9.36889e-06	9.33854e-06	9.33308e-06	9.04444e-06	9.02037e-06	9.00979e-06	9.12381e-06	9.09356e-06	9.09363e-06
2153.66	8.546	1.26681e-05	1.26484e-05	1.25373e-05	1.33237e-05	1.32919e-05	1.31628e-05	1.29843e-05	1.29364e-05	1.28362e-05
2162.08	8.546	1.41231e-05	1.40811e-05	1.40763e-05	1.41249e-05	1.41527e-05	1.41363e-05	1.40672e-05	1.40446e-05	1.40527e-05
2170.49	8.546	6.62148e-06	6.64525e-06	6.68407e-06	6.37818e-06	6.38196e-06	6.40128e-06	6.47973e-06	6.4887e-06	6.5013e-06
2178.91	8.546	1.36624e-06	1.38731e-06	1.36162e-06	1.24642e-06	1.25346e-06	1.24902e-06	1.31461e-06	1.30235e-06	1.33864e-06
2187.33	8.546	9.4206e-07	9.73419e-07	1.00411e-06	9.22084e-07	9.03474e-07	9.26758e-07	9.28271e-07	9.19756e-07	9.63334e-07
2195.74	8.546	4.27537e-07	4.82718e-07	4.77442e-07	3.56846e-07	3.88841e-07	3.54541e-07	4.06429e-07	3.61192e-07	4.2713e-07
2204.16	8.546	6.70108e-08	6.20613e-08	9.23908e-08	6.94669e-08	1.90449e-08	7.95527e-08	5.3307e-08	8.58841e-08	9.13221e-08
2212.58	8.546	3.53264e-07	3.31821e-07	3.55198e-07	3.44151e-07	3.31187e-07	3.37046e-07	3.0779e-07	3.56778e-07	3.21761e-07
2220.99	8.546	2.07716e-07	2.171e-07	1.47187e-07	1.99506e-07	1.86638e-07	1.63989e-07	1.57767e-07	2.20065e-07	2.34459e-07
2229.41	8.546	1.02837e-07	1.82773e-07	1.38398e-07	9.78803e-08	1.13049e-07	1.36702e-07	1.47163e-07	1.25434e-07	6.70296e-08
2237.83	8.546	6.41641e-08	1.70477e-08	1.90728e-08	9.02339e-09	5.25053e-08	2.72545e-08	4.60126e-08	1.84359e-08	2.65743e-08
2246.24	8.546	8.81148e-08	6.02403e-08	8.46523e-08	7.35345e-08	8.87183e-08	6.49702e-08	5.51769e-08	7.25912e-08	4.17317e-08
2254.66	8.546	2.00266e-07	2.06641e-07	1.87802e-07	2.10064e-07	2.44904e-07	2.08442e-07	2.16606e-07	2.08933e-07	2.34771e-07
2263.08	8.546	3.90189e-08	1.08898e-07	6.72164e-08	7.91334e-08	4.60163e-08	1.09725e-07	7.03429e-08	4.95248e-08	7.57752e-08
2271.49	8.546	6.75181e-08	7.46632e-08	5.12299e-08	3.82038e-08	1.39703e-08	5.28442e-08	8.90342e-08	2.82691e-08	6.16812e-08
2279.91	8.546	2.50852e-08	9.64859e-08	6.84188e-08	6.77359e-08	3.17926e-08	3.38685e-08	1.68011e-08	9.64065e-08	8.63907e-08
2288.33	8.546	1.73131e-08	1.08833e-08	3.33662e-08	1.87646e-08	0	4.06436e-08	6.32077e-08	0	5.43263e-08
2296.74	8.546	1.99928e-08	0	2.97908e-08	1.22092e-08	9.96389e-09	0	0	0	1.1975e-08
2305.16	8.546	0	0	0	2.54942e-08	0	2.55415e-08	0	0	1.70248e-08
2313.58	8.546	0	0	0	0	1.79279e-08	0	0	0	2.87305e-08
2321.99	8.546	0	0	0	0	1.34135e-08	0	0	0	0
2330.41	8.546	0	0	0	0	0	0	0	0	0
2338.83	8.546	0	0	0	0	0	0	0	0	0
2347.24	8.546	1.34361e-08	0	0	0	0	0	0	0	0
2355.66	8.546	0	0	0	0	0	0	9.33472e-09	0	0
2364.08	8.546	0	0	0	0	0	0	0	0	0
2372.49	8.546	0	6.16965e-08	0	0	0	0	0	0	0
2380.91	8.546	0	0	0	0	0	0	0	0	0
2389.33	8.546	0	0	0	0	0	0	0	0	0
2397.74	8.546	0	0	3.02219e-09	0	0	0	0	0	0
2406.16	8.546	0	0	0	1.37246e-08	0	3.49457e-08	2.19646e-08	0	0
2414.58	8.546	0	0	0	1.39362e-08	0	0	0	0	5.23145e-10
2422.99	8.546	0	9.77515e-24	3.18972e-09	2.0044e-08	0	0	0	0	0
2431.41	8.546	0	0	0	0	0	1.57006e-08	0	0	4.89768e-08
2439.83	8.546	2.2181e-08	0	0	0	0	2.35544e-08	2.36116e-08	1.00334e-09	0
2448.24	8.546	0	2.50281e-25	0	3.25306e-08	0	5.66022e-08	3.19139e-08	6.87723e-08	0
2456.66	8.546	0	4.32026e-08	0	0	0	4.71655e-08	3.36865e-08	6.03679e-08	0
2465.08	8.546	4.57945e-08	7.60338e-08	7.99841e-08	0	3.93336e-09	5.18388e-08	2.31298e-08	0	0
2473.49	8.546	1.04155e-07	1.64271e-07	5.88095e-09	1.35423e-07	7.0925e-08	2.15782e-07	7.37466e-08	1.64464e-07	1.23272e-08
2481.91	8.546	2.67874e-06	2.43816e-06	2.10885e-06	1.89114e-06	1.64808e-06	1.38933e-06	2.12069e-06	1.99768e-06	1.65425e-06
2490.33	8.546	3.9734e-06	4.07435e-06	4.433e-06	3.31089e-06	3.33461e-06	3.52455e-06	3.57653e-06	3.69107e-06	3.91772e-06
2498.74	8.546	2.03967e-06	1.94623e-06	2.07776e-06	1.90476e-06	1.89441e-06	1.88872e-06	1.80675e-06	1.82781e-06	1.84481e-06
2507.16	8.546	1.12007e-06	1.05873e-06	1.01336e-06	9.29275e-07	1.05344e-06	8.9989e-07	1.15267e-06	9.28759e-07	9.13407e-07
2515.58	8.546	1.90911e-06	2.16358e-06	2.17229e-06	1.58499e-06	1.58029e-06	1.8851e-06	1.6837e-06	1.99905e-06	2.01149e-06

## Sheet: k_GF5A
Wavelength	FWHM	k_Summer_L	k_Summer_M	k_Summer_H	k_Winter_L	k_Winter_M	k_Winter_H	k_1976_L	k_1976_M	k_1976_H
1014.15	8.25	0	0	0	0	0	0	0	0	0
1022.56	8.25	0	0	0	0	0	0	0	0	0
1030.98	8.25	0	0	0	0	0	0	0	0	0
1039.4	8.25	6.27457e-07	6.19801e-07	6.17952e-07	6.23161e-07	6.34093e-07	6.41323e-07	6.24197e-07	6.29717e-07	6.26058e-07
1047.81	8.25	9.44739e-07	9.40855e-07	9.41894e-07	9.72981e-07	9.77895e-07	9.72067e-07	9.43753e-07	9.39718e-07	9.42957e-07
1056.23	8.25	5.16178e-07	5.20245e-07	5.06509e-07	4.9917e-07	4.88726e-07	4.89823e-07	5.03754e-07	5.00844e-07	4.99665e-07
1064.65	8.25	3.20923e-07	3.06424e-07	3.10142e-07	3.25592e-07	3.16344e-07	3.21429e-07	3.14828e-07	3.22824e-07	3.07463e-07
1073.06	8.25	4.67614e-08	5.34944e-08	5.73353e-08	3.08167e-08	3.44908e-08	4.87829e-08	5.0879e-08	3.54148e-08	4.03573e-08
1081.48	8.25	7.01145e-09	4.52696e-09	6.26891e-09	1.05178e-08	8.13779e-10	4.68131e-09	1.75818e-09	1.03318e-08	1.01944e-08
1089.9	8.25	1.64684e-09	0	2.08335e-09	0	0	-1.83615e-09	1.34931e-09	0	0
1098.31	8.25	0	2.66044e-09	0	0	2.29555e-09	0	0	1.90481e-09	0
1106.73	8.25	0	0	0	0	0	0	0	0	0
1115.15	8.25	1.75169e-09	0	5.40308e-09	2.80671e-09	0	3.92541e-24	0	0	0
1123.56	8.25	0	0	0	0	0	0	0	0	0
1131.98	8.25	0	0	0	2.16106e-09	0	0	0	0	0
1140.4	8.25	0	0	0	0	0	0	0	0	0
1148.81	8.25	0	0	0	0	0	0	0	0	0
1157.23	8.25	0	0	0	0	0	0	0	0	0
1165.65	8.25	0	0	0	0	0	0	0	0	0
1174.06	8.25	0	0	0	0	0	0	0	3.92299e-09	0
1182.48	8.25	0	0	0	0	0	0	0	0	0
1190.9	8.25	0	0	0	0	0	0	1.61051e-09	0	0
1199.31	8.25	6.66042e-07	6.34667e-07	5.79795e-07	6.03564e-07	5.81689e-07	5.3614e-07	6.31265e-07	5.99356e-07	5.56253e-07
1207.73	8.25	3.78681e-05	3.71461e-05	3.63586e-05	3.85345e-05	3.78099e-05	3.70112e-05	3.8045e-05	3.73206e-05	3.65298e-05
1216.15	8.25	1.4634e-05	1.47789e-05	1.50123e-05	1.45304e-05	1.46736e-05	1.49337e-05	1.45189e-05	1.46637e-05	1.49171e-05
1224.56	8.25	1.60832e-05	1.62019e-05	1.6379e-05	1.61518e-05	1.62541e-05	1.64282e-05	1.60309e-05	1.61306e-05	1.62968e-05
1232.98	8.25	1.73021e-06	1.73091e-06	1.72609e-06	1.52959e-06	1.54365e-06	1.53576e-06	1.62116e-06	1.61921e-06	1.61748e-06
1241.4	8.25	3.98555e-07	3.86064e-07	3.92661e-07	3.70638e-07	3.6808e-07	3.7077e-07	3.72112e-07	3.79017e-07	3.73802e-07
1249.81	8.25	1.49765e-07	1.54798e-07	1.49241e-07	1.59413e-07	1.54693e-07	1.49586e-07	1.54068e-07	1.52367e-07	1.52337e-07
1258.23	8.25	2.09972e-07	1.93467e-07	2.09674e-07	1.89952e-07	2.02509e-07	2.15813e-07	2.0957e-07	2.00881e-07	1.87602e-07
1266.65	8.25	2.08986e-07	2.27194e-07	2.16514e-07	2.33171e-07	2.24563e-07	2.26969e-07	2.29914e-07	2.08596e-07	2.03487e-07
1275.06	8.25	2.49035e-09	0	0	0	0	2.73558e-09	0	0	0
1283.48	8.25	8.29215e-08	7.15552e-08	7.44422e-08	6.35424e-08	5.42296e-08	6.97233e-08	6.48833e-08	5.56477e-08	5.50834e-08
1291.9	8.25	2.37863e-06	2.38233e-06	2.39372e-06	2.4135e-06	2.41972e-06	2.42514e-06	2.37707e-06	2.38144e-06	2.39814e-06
1300.31	8.25	3.14894e-07	3.1524e-07	3.35935e-07	3.13051e-07	2.99014e-07	2.98676e-07	3.16678e-07	3.02715e-07	3.26861e-07
1308.73	8.25	1.51869e-07	1.67171e-07	1.39326e-07	1.42058e-07	1.38943e-07	1.37647e-07	1.55744e-07	1.49099e-07	1.38346e-07
1317.15	8.25	8.61543e-06	8.61504e-06	8.59008e-06	8.8364e-06	8.86611e-06	8.853e-06	8.69302e-06	8.72672e-06	8.69467e-06
1325.56	8.25	7.76198e-07	8.16573e-07	8.12425e-07	6.66172e-07	7.0632e-07	7.37201e-07	6.92149e-07	7.39121e-07	7.54104e-07
1333.98	8.25	1.13007e-06	1.10103e-06	1.0694e-06	1.08229e-06	1.04743e-06	1.01562e-06	1.09463e-06	1.0682e-06	1.03965e-06
1342.4	8.25	2.98345e-06	3.06231e-06	3.10548e-06	3.0577e-06	3.20294e-06	3.24001e-06	3.01339e-06	3.1218e-06	3.13561e-06
1350.81	8.25	3.26076e-07	2.3635e-07	3.39615e-07	2.49966e-07	3.29554e-07	3.37158e-07	2.89923e-07	3.45469e-07	4.42201e-07
1359.23	8.25	7.84117e-09	4.92669e-08	0	5.47895e-08	1.10914e-08	6.34955e-09	3.16577e-08	5.84138e-08	0
1367.65	8.25	1.88573e-07	1.0683e-07	3.54814e-08	1.53512e-07	6.82074e-08	4.75213e-08	2.3103e-07	1.20346e-07	3.88997e-08
1376.06	8.25	2.50523e-07	2.1923e-07	1.07985e-07	2.4119e-07	2.26616e-07	7.44245e-08	2.4496e-07	2.1459e-07	7.74838e-08
1384.48	8.25	2.75446e-08	8.23384e-09	2.92384e-09	0	9.68843e-09	0	6.26644e-08	1.16936e-08	-8.89614e-09
1392.9	8.25	1.60745e-10	0	0	9.83645e-10	0	0	0	0	0
1401.31	8.25	0	0	0	2.75757e-08	0	0	0	0	7.87804e-09
1409.73	8.25	0	0	-4.78088e-09	0	0	0	0	0	0
1418.15	8.25	0	1.83823e-08	0	9.04396e-09	0	1.82087e-08	6.73323e-09	0	7.99209e-10
1426.56	8.25	1.58085e-06	2.3502e-06	3.61606e-06	1.41322e-06	2.19023e-06	3.20812e-06	1.43803e-06	2.21667e-06	3.35187e-06
1434.98	8.25	0.000344029	0.000325121	0.000291026	0.000358986	0.000340326	0.000308773	0.000350571	0.000331597	0.000297631
1443.4	8.25	0.000143	0.000144523	0.000146145	0.000132792	0.000134515	0.000138119	0.000136488	0.000138028	0.000140285
1451.81	8.25	1.33724e-05	1.35034e-05	1.35019e-05	1.035e-05	1.05277e-05	1.05972e-05	1.14218e-05	1.15694e-05	1.15846e-05
1460.23	8.25	5.82947e-07	5.82304e-07	5.57686e-07	3.80548e-07	4.30885e-07	3.8787e-07	4.48834e-07	4.79787e-07	4.92229e-07
1468.65	8.25	4.39496e-06	3.98899e-06	3.17448e-06	4.33662e-06	4.01657e-06	3.22219e-06	4.33211e-06	3.95172e-06	3.21173e-06
1477.06	8.25	1.02282e-05	9.68101e-06	8.95723e-06	1.05164e-05	9.99433e-06	9.31021e-06	1.03378e-05	9.83741e-06	9.1415e-06
1485.48	8.25	1.98595e-06	1.95399e-06	1.93341e-06	1.76511e-06	1.75461e-06	1.70992e-06	1.87219e-06	1.81867e-06	1.80812e-06
1493.9	8.25	3.12522e-06	3.21988e-06	3.40677e-06	3.09751e-06	3.19309e-06	3.36279e-06	3.11059e-06	3.19045e-06	3.38619e-06
1502.31	8.25	6.32569e-07	6.28527e-07	6.46952e-07	5.75672e-07	5.86217e-07	5.95274e-07	5.86068e-07	5.8753e-07	6.1642e-07
1510.73	8.25	1.3684e-08	2.04656e-08	1.99563e-08	1.99739e-08	1.111e-08	1.08216e-08	1.50452e-08	2.47213e-08	2.85304e-08
1519.15	8.25	1.4596e-07	1.46031e-07	1.33817e-07	1.10063e-07	8.7089e-08	1.09203e-07	9.51245e-08	1.06884e-07	1.02332e-07
1527.56	8.25	7.00567e-06	6.99308e-06	7.01466e-06	6.26528e-06	6.27715e-06	6.26746e-06	6.52137e-06	6.52581e-06	6.5302e-06
1535.98	8.25	3.80668e-05	3.80617e-05	3.8054e-05	3.8904e-05	3.88896e-05	3.88557e-05	3.83414e-05	3.83267e-05	3.83199e-05
1544.4	8.25	1.72333e-05	1.72082e-05	1.72159e-05	1.70004e-05	1.70161e-05	1.70131e-05	1.70201e-05	1.70051e-05	1.70223e-05
1552.81	8.25	3.18171e-07	3.06739e-07	3.12693e-07	2.74454e-07	2.77251e-07	2.68396e-07	2.8434e-07	2.86216e-07	2.94364e-07
1561.23	8.25	4.28158e-07	4.25971e-07	4.34244e-07	4.02293e-07	4.16633e-07	4.15955e-07	4.22899e-07	4.17722e-07	4.17186e-07
1569.65	8.25	0.000155536	0.000155599	0.000155703	0.000152311	0.000152348	0.000152476	0.000152972	0.000153036	0.000153145
1578.06	8.25	0.000168389	0.000168348	0.000168298	0.000172211	0.000172166	0.000172111	0.000169717	0.000169688	0.000169617
1586.48	8.25	2.4253e-05	2.42293e-05	2.41611e-05	2.18407e-05	2.18113e-05	2.1768e-05	2.27419e-05	2.2737e-05	2.26743e-05
1594.9	8.25	1.10101e-05	1.10047e-05	1.10316e-05	9.7049e-06	9.70257e-06	9.70848e-06	1.01854e-05	1.01934e-05	1.0211e-05
1603.31	8.25	0.000194759	0.000194756	0.000194782	0.000201993	0.00020202	0.000202047	0.000197946	0.000197954	0.000197983
1611.73	8.25	0.000140404	0.000140387	0.000140322	0.000139316	0.000139313	0.000139261	0.000139166	0.000139117	0.000139099
1620.15	8.25	1.66713e-05	1.66907e-05	1.66519e-05	1.34833e-05	1.34925e-05	1.3478e-05	1.47632e-05	1.47539e-05	1.47463e-05
1628.56	8.25	4.19329e-06	4.20518e-06	4.21881e-06	4.01795e-06	4.03138e-06	4.0175e-06	4.07805e-06	4.07755e-06	4.08724e-06
1636.98	8.25	1.19049e-05	1.18957e-05	1.18687e-05	1.13874e-05	1.13955e-05	1.13426e-05	1.15482e-05	1.1548e-05	1.15328e-05
1645.4	8.25	3.23903e-05	3.24256e-05	3.24544e-05	3.38514e-05	3.38664e-05	3.39166e-05	3.31005e-05	3.31178e-05	3.31569e-05
1653.81	8.25	1.548e-05	1.54852e-05	1.54457e-05	1.47798e-05	1.47652e-05	1.4745e-05	1.50355e-05	1.50415e-05	1.5006e-05
1662.23	8.25	2.90334e-06	2.90474e-06	2.90237e-06	2.50209e-06	2.49691e-06	2.50627e-06	2.59567e-06	2.59325e-06	2.60392e-06
1670.65	8.25	1.25157e-06	1.2531e-06	1.26579e-06	1.02456e-06	1.03612e-06	1.03846e-06	1.11017e-06	1.11068e-06	1.12968e-06
1679.06	8.25	3.11516e-07	2.79728e-07	2.96966e-07	2.58789e-07	2.60232e-07	2.53319e-07	2.68151e-07	2.68705e-07	2.64472e-07
1687.48	8.25	9.65726e-08	9.50157e-08	1.07024e-07	1.10771e-07	8.82254e-08	1.0168e-07	1.15905e-07	8.75024e-08	9.51521e-08
1695.9	8.25	1.22307e-08	3.33449e-08	1.18109e-08	4.33611e-08	1.56399e-08	1.46147e-08	1.81992e-08	1.34223e-08	1.04287e-08
1704.31	8.25	1.59864e-08	9.04521e-09	2.83784e-08	1.02685e-08	1.0946e-08	1.16924e-08	1.61303e-08	3.13913e-08	3.21553e-08
1712.73	8.25	4.56584e-08	2.04399e-08	1.78658e-08	1.84368e-08	1.12593e-08	1.62949e-08	2.23501e-08	3.40271e-08	3.30734e-08
1721.15	8.25	2.40832e-08	9.23949e-09	3.80848e-08	3.37323e-08	1.45905e-24	2.0667e-08	6.68758e-09	0	2.44577e-08
1729.56	8.25	7.49718e-09	2.09456e-08	7.77827e-09	0	0	0	1.45246e-24	0	2.76231e-24
1737.98	8.25	0	9.31639e-09	1.20259e-08	0	0	0	0	0	0
1746.4	8.25	0	0	0	0	0	0	0	0	0
1754.81	8.25	3.0732e-07	3.1952e-07	3.10572e-07	2.21607e-07	2.15544e-07	2.16972e-07	2.61562e-07	2.59078e-07	2.75335e-07
1763.23	8.25	2.53957e-07	2.57824e-07	2.87081e-07	1.54897e-07	1.86671e-07	1.5788e-07	1.87081e-07	1.95255e-07	1.79287e-07
1771.65	8.25	5.99298e-08	6.08285e-08	8.27466e-08	5.7611e-08	2.764e-08	2.08435e-08	2.11393e-08	4.73777e-08	1.9405e-08
1780.06	8.25	0	4.16597e-09	9.59356e-09	4.54292e-09	9.24922e-09	0	4.4645e-09	0	5.02073e-08
1788.48	8.25	3.28569e-07	3.33008e-07	3.27337e-07	2.12387e-07	2.60789e-07	2.10479e-07	2.60383e-07	2.55236e-07	2.53547e-07
1796.9	8.25	1.42543e-07	1.09656e-07	1.73761e-07	9.99307e-08	4.08254e-08	1.03082e-07	1.3232e-07	1.00029e-07	8.53176e-08
1805.31	8.25	5.14535e-08	5.86576e-08	1.8278e-07	2.63889e-08	8.04487e-08	5.54176e-10	4.68258e-08	9.03862e-08	2.92571e-08
1813.73	8.25	6.77027e-08	0	6.95054e-09	2.31192e-08	0	1.84996e-23	4.66697e-08	1.07352e-07	0
1822.15	8.25	4.35543e-11	2.20085e-09	1.61723e-08	0	0	0	0	0	0
1830.56	8.25	0	0	0	0	0	0	0	0	0
1838.98	8.25	0	0	0	0	0	0	0	0	0
1847.4	8.25	0	0	0	0	0	0	0	0	0
1855.82	8.25	0	0	0	0	0	0	0	0	0
1864.23	8.25	1.59884e-08	3.15052e-10	6.66282e-08	1.91165e-07	6.39258e-09	7.87483e-08	6.8716e-09	0	1.00043e-08
1872.65	8.25	1.15645e-05	4.01329e-06	2.66157e-06	1.08937e-05	3.18878e-06	1.9382e-06	1.10659e-05	3.61999e-06	2.37917e-06
1881.07	8.25	6.36327e-05	6.06869e-05	3.26545e-05	6.49861e-05	6.20465e-05	2.79579e-05	6.40896e-05	6.09658e-05	3.04712e-05
1889.48	8.25	1.57495e-05	1.52535e-05	8.36435e-06	1.54115e-05	1.52544e-05	7.57348e-06	1.54815e-05	1.50408e-05	7.80719e-06
1897.9	8.25	3.23479e-06	3.32896e-06	1.41722e-06	2.85533e-06	2.84619e-06	1.01535e-06	2.9162e-06	2.99838e-06	1.18987e-06
1906.32	8.25	1.39659e-06	1.06254e-06	2.39361e-07	1.11454e-06	9.30255e-07	2.05567e-07	1.05694e-06	9.75821e-07	3.14222e-07
1914.73	8.25	6.85109e-07	5.0899e-07	2.50867e-07	5.84653e-07	3.53912e-07	1.71398e-07	5.9613e-07	4.76474e-07	1.97198e-07
1923.15	8.25	7.92151e-07	6.99784e-07	3.98763e-07	4.94789e-07	5.28651e-07	2.15774e-07	6.46622e-07	5.6191e-07	2.72903e-07
1931.57	8.25	2.20864e-06	3.22971e-06	3.99865e-06	1.58647e-06	2.30785e-06	3.2179e-06	1.72716e-06	2.52651e-06	3.34468e-06
1939.98	8.25	0.000116221	0.000156327	0.000199314	8.56358e-05	0.00011311	0.000148128	9.78583e-05	0.000130458	0.000168949
1948.4	8.25	0.000743749	0.00075711	0.000767081	0.00068315	0.000699951	0.000720154	0.000707543	0.000722618	0.000737406
1956.82	8.25	0.00159298	0.00153623	0.00140932	0.00161936	0.00157457	0.00148093	0.00159878	0.00154811	0.00143472
1965.23	8.25	0.00114792	0.00113163	0.00111097	0.00118801	0.00117303	0.00115447	0.00116294	0.00114724	0.00112666
1973.65	8.25	0.000381439	0.00038298	0.000385573	0.000370088	0.000371745	0.000375627	0.000373725	0.00037538	0.000378546
1982.07	8.25	7.07325e-05	6.89092e-05	6.53896e-05	6.07265e-05	5.92314e-05	5.64033e-05	6.4703e-05	6.30527e-05	5.99076e-05
1990.48	8.25	5.14271e-05	5.13972e-05	5.12129e-05	4.64047e-05	4.63251e-05	4.61878e-05	4.81916e-05	4.81578e-05	4.79226e-05
1998.9	8.25	0.00110724	0.00111787	0.00113746	0.00105013	0.00106128	0.00108096	0.00107298	0.00108396	0.0011037
2007.32	8.25	0.00287726	0.00283823	0.00277646	0.00289877	0.00286324	0.00280747	0.00287955	0.00284236	0.00278306
2015.73	8.25	0.00276826	0.00277431	0.0027805	0.00278284	0.00278768	0.00279382	0.00276148	0.00276685	0.00277282
2024.15	8.25	0.000887989	0.000889978	0.000890922	0.000795906	0.000797155	0.000797337	0.000833009	0.000834475	0.000835066
2032.57	8.25	0.000331123	0.000330057	0.000328676	0.000290275	0.000289711	0.000288898	0.000306164	0.000305395	0.0003043
2040.98	8.25	0.000303278	0.000302678	0.000301789	0.000303495	0.000303022	0.000302186	0.000301934	0.000301343	0.000300546
2049.4	8.25	0.000733069	0.000731188	0.000727309	0.000726115	0.000724582	0.000721506	0.00072638	0.000724722	0.000721234
2057.82	8.25	0.000850281	0.000851363	0.000853064	0.000890061	0.00089163	0.000894357	0.000868056	0.000869272	0.000871376
2066.23	8.25	0.000900669	0.000901478	0.00090336	0.000925999	0.000926704	0.000928369	0.00090975	0.000910541	0.000912356
2074.65	8.25	0.000611833	0.000611236	0.000610103	0.000571841	0.000571303	0.000570247	0.000587539	0.000586989	0.000585914
2083.07	8.25	0.000332496	0.000332299	0.000332006	0.000297096	0.000296975	0.000296791	0.000311026	0.000310851	0.000310644
2091.48	8.25	0.000206115	0.000206211	0.000206234	0.000175417	0.000175532	0.000175679	0.000187588	0.000187718	0.000187785
2099.9	8.25	7.11482e-05	7.10321e-05	7.08379e-05	6.25171e-05	6.23397e-05	6.20646e-05	6.56875e-05	6.55488e-05	6.5266e-05
2108.32	8.25	2.81372e-05	2.80532e-05	2.78978e-05	2.58239e-05	2.57144e-05	2.55309e-05	2.64974e-05	2.64002e-05	2.62495e-05
2116.73	8.25	1.93477e-05	1.93971e-05	1.94217e-05	1.77299e-05	1.77834e-05	1.78321e-05	1.81729e-05	1.82356e-05	1.82921e-05
2125.15	8.25	3.7047e-06	3.72144e-06	3.73511e-06	2.72646e-06	2.78072e-06	2.7772e-06	3.21837e-06	3.26108e-06	3.27385e-06
2133.57	8.25	1.96499e-06	1.94002e-06	1.94725e-06	1.77496e-06	1.77518e-06	1.77126e-06	1.8686e-06	1.89197e-06	1.90476e-06
2141.98	8.25	2.61555e-06	2.6091e-06	2.6208e-06	2.41713e-06	2.43707e-06	2.39327e-06	2.44201e-06	2.42751e-06	2.44208e-06
2150.4	8.25	1.9719e-05	1.97519e-05	1.98199e-05	2.01794e-05	2.02022e-05	2.02732e-05	1.98877e-05	1.99333e-05	1.99881e-05
2158.82	8.25	1.16957e-05	1.16565e-05	1.15848e-05	1.19729e-05	1.19571e-05	1.18917e-05	1.1804e-05	1.17267e-05	1.17123e-05
2167.23	8.25	9.50047e-06	9.49896e-06	9.50104e-06	9.22876e-06	9.2235e-06	9.23824e-06	9.32869e-06	9.31808e-06	9.31103e-06
2175.65	8.25	2.7283e-06	2.76747e-06	2.77344e-06	2.6046e-06	2.62813e-06	2.63901e-06	2.70988e-06	2.68811e-06	2.71499e-06
2184.07	8.25	7.23956e-07	7.13788e-07	7.04233e-07	6.4707e-07	6.20013e-07	6.33091e-07	6.6322e-07	6.56649e-07	6.91024e-07
2192.48	8.25	7.79567e-07	8.22029e-07	8.57043e-07	7.36652e-07	7.38608e-07	7.19741e-07	7.63943e-07	7.18141e-07	7.74211e-07
2200.9	8.25	1.31496e-07	1.83019e-07	1.71477e-07	9.86318e-08	1.25096e-07	1.233e-07	1.38801e-07	1.25408e-07	1.75082e-07
2209.32	8.25	2.80152e-07	2.55009e-07	2.63457e-07	2.70085e-07	2.24308e-07	2.66772e-07	2.28148e-07	2.8624e-07	2.73539e-07
2217.73	8.25	1.9794e-07	1.65869e-07	1.5445e-07	1.74057e-07	1.84074e-07	1.89554e-07	1.42151e-07	2.2475e-07	1.96468e-07
2226.15	8.25	1.7428e-07	2.68755e-07	1.62671e-07	1.81344e-07	1.81314e-07	1.80124e-07	1.99174e-07	1.87592e-07	1.8147e-07
2234.57	8.25	9.01475e-08	5.91413e-08	5.68129e-08	4.40037e-08	6.94598e-08	4.43943e-08	6.25064e-08	6.02063e-08	3.46846e-08
2242.98	8.25	1.87082e-08	1.95973e-08	2.6362e-08	3.45908e-08	4.89127e-08	4.32325e-08	2.08522e-08	3.4052e-08	7.80565e-24
2251.4	8.25	2.13755e-07	1.72782e-07	1.79802e-07	1.78366e-07	1.99831e-07	1.76232e-07	1.83613e-07	1.97843e-07	2.0359e-07
2259.82	8.25	9.36285e-08	1.59492e-07	1.13854e-07	1.35751e-07	1.2169e-07	1.46495e-07	1.38232e-07	1.01908e-07	1.16247e-07
2268.23	8.25	3.6473e-08	5.90133e-08	2.9338e-08	2.91434e-08	2.31463e-08	2.51717e-08	3.96996e-08	9.37316e-09	6.49037e-08
2276.65	8.25	6.53419e-08	1.49198e-07	1.06044e-07	5.64367e-08	3.93347e-08	6.56449e-08	8.16258e-08	1.43515e-07	7.5333e-08
2285.07	8.25	1.96539e-08	7.90252e-09	1.39034e-08	3.66318e-08	0	2.02111e-08	2.6302e-08	0	8.42317e-08
2293.48	8.25	3.83791e-08	0	5.39119e-08	0	1.20333e-08	1.49982e-08	5.80689e-08	0	3.91921e-08
2301.9	8.25	0	0	0	3.94414e-08	0	2.19643e-08	0	0	0
2310.32	8.25	0	0	0	0	2.54378e-08	0	0	0	2.58505e-08
2318.73	8.25	0	0	0	0	2.52601e-08	0	0	0	2.13355e-08
2327.15	8.25	0	0	0	0	0	0	0	0	0
2335.57	8.25	0	0	0	0	0	0	0	0	0
2343.98	8.25	0	0	0	0	0	0	0	0	0
2352.4	8.25	7.98024e-09	0	0	0	0	0	0	0	0
2360.82	8.25	0	0	0	0	0	0	1.15247e-08	0	0
2369.23	8.25	0	4.35508e-08	0	0	0	0	0	0	0
2377.65	8.25	0	1.70657e-08	0	0	0	0	0	0	0
2386.07	8.25	0	0	0	0	0	0	0	0	0
2394.48	8.25	0	0	2.60703e-09	0	0	0	0	0	0
2402.9	8.25	0	0	0	6.93358e-09	0	2.17181e-08	2.10648e-08	0	0
2411.32	8.25	0	0	0	6.99822e-09	0	0	0	0	0
2419.73	8.25	0	0	6.36507e-09	3.363e-08	0	0	0	0	3.72658e-10
2428.15	8.25	0	1.77482e-23	0	0	0	1.85914e-08	0	0	3.33537e-08
2436.57	8.25	0	0	0	0	0	0	0	2.36248e-09	0
2444.98	8.25	1.83629e-08	1.64609e-25	0	4.35782e-08	0	7.23827e-08	1.82036e-08	1.82472e-09	0
2453.4	8.25	0	4.87513e-08	0	0	0	0	0	0	0
2461.82	8.25	1.70031e-08	0	4.13854e-08	0	5.05626e-09	3.95552e-08	0	2.49114e-08	0
2470.23	8.25	1.22339e-07	2.17479e-07	1.44156e-08	7.85912e-08	7.30795e-08	1.31082e-07	1.08025e-07	1.13211e-07	1.23222e-08
2478.65	8.25	4.25793e-07	3.43998e-07	1.97717e-07	3.27916e-07	2.28949e-07	1.96946e-07	2.52519e-07	3.03339e-07	1.52637e-07
2487.07	8.25	6.26289e-06	6.29206e-06	6.44131e-06	4.95324e-06	4.83474e-06	4.92146e-06	5.40412e-06	5.46071e-06	5.545e-06
2495.48	8.25	1.8312e-06	1.91048e-06	2.13687e-06	1.65037e-06	1.75479e-06	1.90628e-06	1.58985e-06	1.69419e-06	1.80492e-06
2503.9	8.25	1.48909e-06	1.42519e-06	1.51915e-06	1.40677e-06	1.53983e-06	1.50167e-06	1.50354e-06	1.43511e-06	1.47994e-06
2512.32	8.25	1.66522e-06	1.65307e-06	1.48283e-06	1.33802e-06	1.286e-06	1.28789e-06	1.53266e-06	1.56217e-06	1.37358e-06
2520.73	8.25	1.13089e-06	1.26491e-06	9.31827e-07	1.0552e-06	1.04353e-06	8.81764e-07	1.20379e-06	1.20476e-06	8.70214e-07

## Sheet: k_GF5
Wavelength	FWHM	k_Summer_L	k_Summer_M	k_Summer_H	k_Winter_L	k_Winter_M	k_Winter_H	k_1976_L	k_1976_M	k_1976_H
1004.77	7.67828	0	0	0	0	0	0	0	0	0
1013.2	7.68189	0	0	0	0	0	0	0	0	0
1021.62	7.68551	0	0	0	0	0	0	0	0	0
1030.05	7.68912	0	0	0	0	0	0	0	0	0
1038.48	7.69273	6.76648e-07	6.70247e-07	6.69428e-07	6.7672e-07	6.86611e-07	6.95193e-07	6.75742e-07	6.81481e-07	6.78783e-07
1046.91	7.69634	7.17488e-07	7.12376e-07	7.10183e-07	7.28552e-07	7.35341e-07	7.31452e-07	7.12264e-07	7.05678e-07	7.07299e-07
1055.33	7.69995	7.17747e-07	7.24391e-07	7.07936e-07	7.08452e-07	7.00652e-07	6.99153e-07	7.09835e-07	7.09624e-07	7.04167e-07
1063.76	7.70356	3.07732e-07	2.91732e-07	2.99831e-07	3.12786e-07	3.02325e-07	3.07848e-07	3.01803e-07	3.08968e-07	2.92282e-07
1072.19	7.70718	5.30654e-08	6.0165e-08	6.32956e-08	3.56778e-08	3.92736e-08	5.54793e-08	5.66888e-08	4.45048e-08	4.49013e-08
1080.62	7.71079	8.43353e-09	7.25487e-09	6.96968e-09	1.37077e-08	2.76353e-09	8.81788e-09	4.21274e-09	1.36634e-08	1.71896e-08
1089.04	7.7144	0	0	1.74058e-09	0	0	-1.57154e-09	1.29302e-09	0	0
1097.47	7.71801	0	3.26727e-09	0	0	2.83396e-09	0	0	2.42112e-09	0
1105.9	7.72162	0	0	0	0	0	0	0	0	0
1114.32	7.72523	1.87544e-09	0	4.21735e-09	0	0	3.97277e-24	0	0	0
1122.75	7.72885	0	0	0	0	0	0	0	0	0
1131.18	7.73246	0	0	0	2.27228e-09	0	0	0	0	0
1139.61	7.73607	0	0	0	0	0	0	0	0	0
1148.03	7.73968	0	0	0	0	0	0	0	0	0
1156.46	7.74329	0	0	0	0	0	0	0	0	0
1164.89	7.7469	0	0	0	0	0	0	0	0	0
1173.32	7.75052	0	0	0	0	0	0	0	4.0166e-09	0
1181.74	7.75413	0	0	0	0	0	0	0	0	0
1190.17	7.75774	0	0	0	0	0	0	1.60848e-09	0	0
1198.6	7.76135	5.66262e-09	2.61668e-09	2.53239e-09	0	9.26726e-10	1.11128e-09	5.40852e-09	0	2.89496e-09
1206.8	7.3271	4.4222e-05	4.3365e-05	4.239e-05	4.50516e-05	4.41856e-05	4.31996e-05	4.44722e-05	4.36054e-05	4.26342e-05
1215.2	7.76857	9.14684e-06	9.24288e-06	9.39533e-06	8.7376e-06	8.83344e-06	9.00897e-06	8.88572e-06	8.98087e-06	9.15047e-06
1223.6	8.1949	1.93581e-05	1.95378e-05	1.98131e-05	1.97617e-05	1.99299e-05	2.02098e-05	1.94874e-05	1.96506e-05	1.99235e-05
1232.34	8.48475	1.92733e-06	1.93436e-06	1.92871e-06	1.68969e-06	1.70365e-06	1.70016e-06	1.78762e-06	1.79101e-06	1.7841e-06
1240.76	8.26	4.85958e-07	4.77009e-07	4.79996e-07	4.5616e-07	4.51327e-07	4.54913e-07	4.60186e-07	4.62841e-07	4.61386e-07
1249.21	7.78302	1.34319e-07	1.4087e-07	1.33768e-07	1.47235e-07	1.38946e-07	1.34916e-07	1.39692e-07	1.37693e-07	1.37957e-07
1257.66	7.78663	2.09372e-07	1.91337e-07	2.06319e-07	1.87458e-07	2.00506e-07	2.1359e-07	2.11662e-07	1.97829e-07	1.873e-07
1266.1	7.79024	2.33076e-07	2.46095e-07	2.40038e-07	2.53071e-07	2.45519e-07	2.45354e-07	2.50637e-07	2.32785e-07	2.22342e-07
1274.55	7.79386	2.94148e-09	0	0	0	0	3.17856e-09	0	0	0
1283	7.79747	5.19137e-08	4.3237e-08	4.40901e-08	3.79938e-08	3.04439e-08	4.4785e-08	3.65007e-08	2.87381e-08	3.00822e-08
1291.45	7.80108	2.33974e-06	2.34566e-06	2.3637e-06	2.36985e-06	2.37888e-06	2.38428e-06	2.33449e-06	2.34186e-06	2.36089e-06
1299.9	7.80469	4.0369e-07	4.05821e-07	4.25818e-07	3.99296e-07	3.87902e-07	3.86848e-07	4.08141e-07	3.93519e-07	4.13893e-07
1308.34	7.8083	3.68114e-08	5.64304e-08	3.18284e-08	4.48955e-08	4.04679e-08	4.49686e-08	5.38214e-08	5.07847e-08	4.14002e-08
1316.79	7.81191	8.81768e-06	8.84223e-06	8.84186e-06	9.05224e-06	9.10519e-06	9.11313e-06	8.9028e-06	8.961e-06	8.95227e-06
1325.24	7.81553	9.47212e-07	9.67618e-07	9.54244e-07	8.2625e-07	8.54233e-07	8.67766e-07	8.55213e-07	8.90338e-07	8.91013e-07
1333.69	7.81914	7.89618e-07	7.84161e-07	7.98789e-07	7.37067e-07	7.27891e-07	7.3922e-07	7.51719e-07	7.54866e-07	7.63735e-07
1342.14	7.82275	3.14854e-06	3.23188e-06	3.27233e-06	3.24839e-06	3.3957e-06	3.42985e-06	3.19561e-06	3.29878e-06	3.32029e-06
1350.58	7.82636	3.28323e-07	2.36087e-07	3.41097e-07	2.50892e-07	3.30333e-07	3.37834e-07	2.92526e-07	3.45554e-07	4.44198e-07
1359.03	7.82997	8.37643e-09	2.1838e-08	0	2.18051e-08	8.67078e-09	6.48917e-09	3.42253e-08	6.27179e-08	0
1367.48	7.83358	1.69626e-07	9.90552e-08	3.33783e-08	1.35533e-07	5.44554e-08	4.44767e-08	2.12532e-07	1.11709e-07	3.23403e-08
1375.93	7.8372	2.6204e-07	2.26491e-07	1.12711e-07	2.5111e-07	2.33971e-07	7.78257e-08	2.54953e-07	2.09319e-07	8.06509e-08
1384.37	7.84081	2.65593e-08	8.57549e-09	3.0451e-09	0	1.02836e-08	0	6.05431e-08	1.1984e-08	-9.43286e-09
1392.82	7.84442	1.68043e-10	0	0	9.28824e-10	0	0	0	0	0
1401.27	7.84803	0	0	0	2.91811e-08	0	0	0	0	8.21858e-09
1409.72	7.85164	0	0	-4.9614e-09	0	0	0	0	0	0
1418.17	7.85525	0	0	0	9.14531e-09	0	9.1653e-09	6.66954e-09	0	8.59229e-10
1426.61	7.85887	7.2569e-07	9.62274e-07	1.38637e-06	6.23732e-07	9.4497e-07	1.23815e-06	6.22657e-07	9.17105e-07	1.30782e-06
1435.06	7.86248	0.000327839	0.000312513	0.000282403	0.000342721	0.000327639	0.000300342	0.000334307	0.000318922	0.000289146
1443.51	7.86609	0.000144071	0.000145536	0.00014682	0.000133748	0.000135495	0.000138752	0.000137505	0.000139036	0.00014096
1451.96	7.8697	1.21013e-05	1.19482e-05	1.16442e-05	9.26341e-06	9.1961e-06	9.00157e-06	1.02548e-05	1.01402e-05	9.87441e-06
1460.4	7.87331	5.3038e-07	5.33976e-07	5.09578e-07	3.43365e-07	3.96533e-07	3.54529e-07	4.03882e-07	4.33539e-07	4.55432e-07
1468.85	7.87692	4.79377e-06	4.48443e-06	3.7845e-06	4.73596e-06	4.50651e-06	3.82941e-06	4.72879e-06	4.44103e-06	3.81349e-06
1477.3	7.88054	9.93255e-06	9.44165e-06	8.775e-06	1.02004e-05	9.72851e-06	9.10302e-06	1.00307e-05	9.58203e-06	8.94205e-06
1485.75	7.88415	1.9025e-06	1.91211e-06	1.89964e-06	1.67903e-06	1.71272e-06	1.67758e-06	1.78668e-06	1.77835e-06	1.77584e-06
1494.2	7.88776	3.29538e-06	3.39715e-06	3.5839e-06	3.2778e-06	3.37807e-06	3.54931e-06	3.28346e-06	3.37021e-06	3.56961e-06
1502.64	7.89137	5.34656e-07	5.3193e-07	5.47697e-07	4.92038e-07	5.0348e-07	5.09025e-07	4.96916e-07	4.99941e-07	5.28582e-07
1511.09	7.89498	1.21707e-08	2.17862e-08	2.09761e-08	1.85698e-08	1.19334e-08	1.09036e-08	1.28001e-08	2.29477e-08	2.39464e-08
1519.54	7.89859	1.93153e-07	1.88467e-07	1.81356e-07	1.43655e-07	1.22215e-07	1.44348e-07	1.34793e-07	1.46804e-07	1.41439e-07
1527.99	7.90221	7.3065e-06	7.29502e-06	7.32573e-06	6.55106e-06	6.56367e-06	6.56281e-06	6.81196e-06	6.81653e-06	6.82876e-06
1536.43	7.90582	3.87539e-05	3.87502e-05	3.875e-05	3.98398e-05	3.98308e-05	3.98021e-05	3.91591e-05	3.91486e-05	3.91466e-05
1544.88	7.90943	1.40371e-05	1.40036e-05	1.3991e-05	1.36601e-05	1.36661e-05	1.3647e-05	1.3752e-05	1.37284e-05	1.37307e-05
1553.33	6.6598	2.79133e-07	2.72202e-07	2.83807e-07	2.51975e-07	2.6304e-07	2.53194e-07	2.59076e-07	2.5332e-07	2.70506e-07
1560.93	8.4042	4.29007e-07	4.25802e-07	4.35741e-07	4.03831e-07	4.18984e-07	4.16388e-07	4.24013e-07	4.19792e-07	4.18799e-07
1569.23	7.8809	0.000134658	0.000134712	0.000134801	0.000130646	0.000130674	0.000130789	0.000131752	0.000131806	0.000131898
1577.61	7.45885	0.000173312	0.000173281	0.000173261	0.000177894	0.000177855	0.00017782	0.000175035	0.000175019	0.000174966
1586.31	7.4983	2.32005e-05	2.31734e-05	2.30917e-05	2.06819e-05	2.0655e-05	2.0599e-05	2.1632e-05	2.16249e-05	2.15526e-05
1594.96	7.7622	9.16889e-06	9.16124e-06	9.17859e-06	8.02116e-06	8.0167e-06	8.01545e-06	8.44273e-06	8.44555e-06	8.45572e-06
1603.38	7.93471	0.000196064	0.00019606	0.000196091	0.000203729	0.000203754	0.000203787	0.000199479	0.00019949	0.000199525
1611.79	7.93832	0.000133543	0.000133526	0.000133467	0.000131852	0.000131848	0.000131802	0.000131978	0.00013193	0.000131916
1620.21	7.94194	1.66157e-05	1.66353e-05	1.65964e-05	1.34333e-05	1.34424e-05	1.34283e-05	1.47114e-05	1.47022e-05	1.46946e-05
1628.63	7.94555	4.27242e-06	4.28365e-06	4.29611e-06	4.08343e-06	4.09639e-06	4.08522e-06	4.14343e-06	4.14238e-06	4.15266e-06
1637.05	7.94916	1.21548e-05	1.21484e-05	1.21195e-05	1.16063e-05	1.16145e-05	1.15616e-05	1.17841e-05	1.17835e-05	1.17669e-05
1645.47	7.95277	3.07694e-05	3.07999e-05	3.0835e-05	3.22592e-05	3.2274e-05	3.23234e-05	3.15029e-05	3.15169e-05	3.15559e-05
1653.89	7.95638	1.44608e-05	1.44646e-05	1.44217e-05	1.36663e-05	1.36514e-05	1.36342e-05	1.39667e-05	1.39751e-05	1.39415e-05
1662.31	7.95999	2.89733e-06	2.89872e-06	2.89641e-06	2.49891e-06	2.49366e-06	2.50294e-06	2.59115e-06	2.58841e-06	2.59912e-06
1670.73	7.96361	1.15692e-06	1.15829e-06	1.17021e-06	9.49775e-07	9.6289e-07	9.63124e-07	1.02835e-06	1.02731e-06	1.04812e-06
1679.15	7.96722	3.05166e-07	2.77403e-07	2.90974e-07	2.56206e-07	2.56318e-07	2.50527e-07	2.63622e-07	2.63018e-07	2.5893e-07
1687.57	7.97083	9.30426e-08	9.93055e-08	1.09838e-07	1.11088e-07	8.74283e-08	1.00729e-07	1.16539e-07	9.1296e-08	9.56328e-08
1695.99	7.97444	4.94277e-09	3.43556e-08	1.02301e-08	4.58226e-08	1.6717e-08	9.90323e-09	1.39807e-08	1.33025e-08	1.09858e-08
1704.41	7.97805	1.47595e-08	9.51579e-09	2.5849e-08	8.8265e-09	8.01423e-09	1.22006e-08	1.48156e-08	2.83181e-08	3.33997e-08
1712.83	7.98166	4.07281e-08	2.1124e-08	1.4611e-08	1.6824e-08	7.79631e-09	1.68025e-08	1.8147e-08	2.41856e-08	2.72135e-08
1721.25	7.98528	2.39098e-08	9.35131e-09	3.81788e-08	3.39874e-08	8.76923e-25	2.08132e-08	6.63888e-09	0	2.46738e-08
1729.67	7.98889	6.92901e-09	2.07314e-08	7.28602e-09	0	0	0	2.27883e-24	0	4.77473e-24
1738.08	7.9925	0	9.8053e-09	1.22184e-08	0	0	0	0	0	0
1746.5	7.99611	0	0	0	0	0	0	0	0	0
1754.92	7.99972	3.26987e-07	3.41032e-07	3.32077e-07	2.364e-07	2.30042e-07	2.3201e-07	2.78818e-07	2.76596e-07	2.94747e-07
1763.34	8.00333	2.508e-07	2.56672e-07	2.83623e-07	1.52187e-07	1.864e-07	1.55187e-07	1.86331e-07	1.9076e-07	1.76236e-07
1771.76	8.00695	6.2065e-08	6.05555e-08	7.76352e-08	5.8e-08	2.89473e-08	2.14655e-08	2.18943e-08	4.94009e-08	2.00093e-08
1780.18	8.01056	0	3.90346e-09	0	4.86559e-09	8.56983e-09	0	4.49013e-09	0	5.06844e-08
1788.6	8.01417	3.29287e-07	3.33399e-07	3.27308e-07	2.12948e-07	2.61112e-07	2.10933e-07	2.6096e-07	2.55986e-07	2.54255e-07
1797.02	8.01778	1.42365e-07	1.10015e-07	1.73271e-07	9.99437e-08	4.08975e-08	1.03242e-07	1.32267e-07	1.00204e-07	8.49671e-08
1805.44	8.02139	5.14108e-08	5.90328e-08	1.83756e-07	2.6328e-08	8.0961e-08	5.57886e-10	4.71076e-08	9.10515e-08	2.93563e-08
1813.86	8.025	6.84339e-08	0	7.03055e-09	2.30961e-08	0	2.67469e-23	4.69048e-08	1.0857e-07	0
1822.28	8.02862	4.38099e-11	2.22297e-09	1.61411e-08	0	0	0	0	0	0
1830.7	8.03223	0	0	0	0	0	0	0	0	0
1839.12	8.03584	0	0	0	0	0	0	0	0	0
1847.54	8.03945	0	0	0	0	0	0	0	0	0
1855.96	8.04306	0	0	0	0	0	0	0	0	0
1864.38	8.04667	1.59658e-08	3.09537e-10	6.68823e-08	1.91999e-07	6.40923e-09	7.86268e-08	6.83564e-09	0	1.00762e-08
1872.79	8.05029	1.15336e-05	3.99576e-06	2.64915e-06	1.08652e-05	3.1738e-06	1.92844e-06	1.10353e-05	3.60362e-06	2.36779e-06
1881.21	8.0539	6.37901e-05	6.07859e-05	3.27644e-05	6.51515e-05	6.21468e-05	2.8059e-05	6.42521e-05	6.10657e-05	3.05771e-05
1889.63	8.05751	1.57374e-05	1.52401e-05	8.36957e-06	1.53981e-05	1.52406e-05	7.58115e-06	1.54695e-05	1.5027e-05	7.81309e-06
1898.05	8.06112	3.23282e-06	3.32522e-06	1.41599e-06	2.85412e-06	2.84247e-06	1.01395e-06	2.91436e-06	2.99433e-06	1.18849e-06
1906.47	8.06473	1.39979e-06	1.07046e-06	2.49379e-07	1.11298e-06	9.40339e-07	2.00169e-07	1.03314e-06	9.81787e-07	3.33688e-07
1914.89	8.06834	7.08751e-07	5.46158e-07	2.71992e-07	5.93729e-07	3.74802e-07	1.70513e-07	6.07669e-07	5.03601e-07	1.92578e-07
1923.31	8.07196	7.50506e-07	6.78951e-07	3.9101e-07	4.63428e-07	5.2113e-07	2.19249e-07	6.14965e-07	5.47064e-07	2.75213e-07
1931.73	8.07557	2.02242e-06	3.07271e-06	3.94774e-06	1.46083e-06	2.19189e-06	3.16934e-06	1.58088e-06	2.39513e-06	3.29356e-06
1940.15	8.07918	0.000134868	0.000172169	0.000206622	0.000101079	0.000126915	0.000155177	0.000114694	0.000145241	0.000176103
1948.57	8.08279	0.00074362	0.00075673	0.000766528	0.00068302	0.000699583	0.000719604	0.000707416	0.000722249	0.000736856
1956.99	8.0864	0.00159636	0.00153975	0.00141281	0.00162297	0.00157833	0.00148473	0.00160226	0.00155174	0.00143836
1965.41	8.09001	0.00114896	0.00113272	0.00111212	0.00118922	0.0011743	0.00115579	0.00116407	0.00114842	0.00112789
1973.83	8.09363	0.000360938	0.000360787	0.000360754	0.000348717	0.000348788	0.000350231	0.0003529	0.000352924	0.000353573
1982.25	8.09724	7.06249e-05	6.88096e-05	6.53072e-05	6.06132e-05	5.91228e-05	5.63076e-05	6.4592e-05	6.2948e-05	5.98176e-05
1990.67	8.10085	5.71231e-05	5.70409e-05	5.65328e-05	5.11136e-05	5.10414e-05	5.07041e-05	5.32871e-05	5.32265e-05	5.27372e-05
1999.09	8.10446	0.00126293	0.00127353	0.00128912	0.00120016	0.00121242	0.00122967	0.00122528	0.00123676	0.00125325
2007.5	8.10807	0.00281838	0.00278243	0.00272709	0.00284091	0.00280834	0.00275838	0.00282145	0.00278727	0.00273413
2015.92	8.11168	0.00277388	0.00278051	0.00278725	0.00279119	0.00279666	0.0028035	0.00276848	0.00277447	0.00278105
2024.34	8.1153	0.000882151	0.000885331	0.000887925	0.000788145	0.000790594	0.00079252	0.000826008	0.000828668	0.000830956
2032.76	8.11891	0.00032475	0.000323805	0.000322588	0.000286941	0.000286312	0.000285411	0.000301527	0.000300757	0.000299681
2041.18	8.12252	0.000308253	0.000307802	0.000307198	0.000308398	0.000308064	0.00030749	0.00030684	0.000306408	0.00030589
2049.6	8.12613	0.000733504	0.000731626	0.000727752	0.000726566	0.000725034	0.000721962	0.000726822	0.000725166	0.000721684
2058.02	8.12974	0.00080278	0.000803442	0.000804331	0.000840782	0.000841956	0.000843881	0.000819768	0.000820579	0.00082187
2066.44	8.13335	0.000897035	0.000897974	0.000900144	0.00091778	0.000918568	0.00092039	0.000903634	0.000904534	0.000906572
2074.86	8.13697	0.000612079	0.000611477	0.000610335	0.000572077	0.000571534	0.000570468	0.00058778	0.000587225	0.000586141
2083.28	8.14058	0.000336346	0.000336177	0.000335933	0.000300343	0.000300244	0.000300087	0.000314536	0.000314381	0.000314213
2091.7	8.14419	0.000206102	0.000206198	0.00020622	0.000175403	0.000175518	0.000175664	0.000187574	0.000187703	0.00018777
2100.12	8.1478	7.11357e-05	7.10187e-05	7.08231e-05	6.25088e-05	6.23305e-05	6.2054e-05	6.56769e-05	6.55376e-05	6.52534e-05
2108.54	8.4804	2.81704e-05	2.80858e-05	2.79289e-05	2.58539e-05	2.57436e-05	2.55588e-05	2.65293e-05	2.64314e-05	2.62792e-05
2116.97	8.023	1.98724e-05	1.99242e-05	1.99737e-05	1.82636e-05	1.83262e-05	1.83904e-05	1.86922e-05	1.87697e-05	1.88338e-05
2125.41	8.476	3.45767e-06	3.46803e-06	3.48338e-06	2.49984e-06	2.54851e-06	2.53926e-06	2.99297e-06	3.02965e-06	3.04155e-06
2134.3	8.38695	1.79778e-06	1.77991e-06	1.77556e-06	1.58688e-06	1.60539e-06	1.59374e-06	1.70961e-06	1.73064e-06	1.7431e-06
2142.31	8.12115	2.90683e-06	2.89542e-06	2.90363e-06	2.69738e-06	2.70358e-06	2.66558e-06	2.71623e-06	2.69709e-06	2.71163e-06
2150.88	8.16947	1.91569e-05	1.91924e-05	1.92711e-05	1.96966e-05	1.97247e-05	1.97966e-05	1.93719e-05	1.94205e-05	1.94815e-05
2159.31	8.17308	1.25058e-05	1.24661e-05	1.23951e-05	1.27271e-05	1.27203e-05	1.26615e-05	1.25693e-05	1.24969e-05	1.24847e-05
2167.73	8.1767	9.05273e-06	9.06915e-06	9.09006e-06	8.76707e-06	8.76703e-06	8.80577e-06	8.86684e-06	8.87714e-06	8.8914e-06
2176.16	8.18031	2.49235e-06	2.52969e-06	2.52184e-06	2.36731e-06	2.38427e-06	2.39567e-06	2.46626e-06	2.44857e-06	2.47035e-06
2184.59	8.18392	7.20513e-07	7.2001e-07	7.15227e-07	6.49575e-07	6.27998e-07	6.39534e-07	6.71989e-07	6.58479e-07	7.02438e-07
2193.01	8.18753	7.04692e-07	7.57684e-07	7.70346e-07	6.49249e-07	6.59588e-07	6.40558e-07	6.85729e-07	6.40937e-07	7.05963e-07
2201.44	8.19114	1.03398e-07	1.32915e-07	1.46805e-07	8.16324e-08	9.46296e-08	1.04103e-07	1.08307e-07	1.00562e-07	1.31303e-07
2209.87	8.19475	3.06148e-07	2.80735e-07	2.90117e-07	2.98278e-07	2.55267e-07	2.88157e-07	2.49494e-07	3.11667e-07	2.97751e-07
2218.3	8.19837	1.84693e-07	1.61381e-07	1.3929e-07	1.63998e-07	1.64049e-07	1.82633e-07	1.33789e-07	2.18103e-07	1.92447e-07
2226.72	8.20198	1.64083e-07	2.53728e-07	1.65418e-07	1.62182e-07	1.78063e-07	1.70997e-07	2.05191e-07	1.80829e-07	1.632e-07
2235.15	8.20559	8.96908e-08	5.48247e-08	4.46766e-08	3.99479e-08	6.92968e-08	4.27293e-08	5.47688e-08	4.62948e-08	3.47717e-08
2243.58	8.2092	1.99416e-08	2.46036e-08	2.9478e-08	3.70408e-08	5.03408e-08	4.50071e-08	1.6657e-08	3.72761e-08	6.43196e-24
2252.01	8.21281	2.16023e-07	1.87325e-07	1.82616e-07	1.87219e-07	2.30221e-07	1.91078e-07	2.03057e-07	2.06417e-07	2.24673e-07
2260.43	8.21642	7.81853e-08	1.57293e-07	1.0082e-07	1.27622e-07	1.02111e-07	1.46718e-07	1.30412e-07	8.58396e-08	1.1352e-07
2268.86	8.22004	3.42941e-08	4.01253e-08	2.21012e-08	8.71103e-09	1.6862e-08	1.69478e-08	3.52777e-08	0	4.45242e-08
2277.29	8.22365	6.22178e-08	1.50995e-07	1.06247e-07	7.07079e-08	4.48191e-08	6.48115e-08	7.63083e-08	1.44698e-07	7.75294e-08
2285.71	8.22726	1.85016e-08	8.94331e-09	1.57332e-08	3.61879e-08	0	2.23827e-08	2.5521e-08	0	8.10757e-08
2294.14	8.23087	3.05299e-08	0	5.14019e-08	0	1.23123e-08	1.27735e-08	5.11513e-08	0	3.75617e-08
2302.57	8.23448	0	0	0	3.99235e-08	0	2.40313e-08	0	0	0
2311	8.23809	0	0	0	0	2.49146e-08	0	0	0	3.96924e-08
2319.42	8.24171	0	0	0	0	2.31234e-08	0	0	0	0
2327.85	8.24532	0	0	0	0	0	0	0	0	0
2336.28	8.24893	0	0	0	0	0	0	0	0	0
2344.71	8.25254	7.55683e-09	0	0	0	0	0	0	0	0
2353.13	8.25615	0	0	0	0	0	0	0	0	0
2361.56	8.25976	0	0	0	0	0	0	9.28694e-09	0	0
2369.99	8.26338	0	6.32672e-08	0	0	0	0	0	0	0
2378.41	8.26699	0	0	0	0	0	0	0	0	0
2386.84	8.2706	0	0	0	0	0	0	0	0	0
2395.27	8.27421	0	0	2.84627e-09	0	0	0	0	0	0
2403.7	8.27782	0	0	0	9.84357e-09	0	2.93511e-08	2.40826e-08	0	0
2412.12	8.28143	0	0	0	8.653e-09	0	0	0	0	2.61902e-10
2420.55	8.28505	0	0	5.49512e-09	2.60322e-08	0	0	0	0	0
2428.98	8.28866	0	-2.66522e-25	0	0	0	1.75531e-08	0	0	3.53337e-08
2437.41	8.29227	0	0	0	0	0	0	1.8705e-08	2.0996e-09	0
2445.83	8.29588	0	1.6369e-25	0	4.3698e-08	0	7.25532e-08	2.18149e-08	3.76874e-08	0
2454.26	8.29949	0	5.16098e-08	0	0	0	0	2.75173e-08	3.39603e-08	0
2462.69	8.3031	2.02888e-08	3.15532e-08	5.15368e-08	0	5.23128e-09	0	0	2.17127e-08	0
2471.11	8.30672	1.21596e-07	2.24282e-07	1.48565e-08	8.31228e-08	7.34102e-08	1.00231e-07	1.10871e-07	1.2657e-07	1.39802e-08
2479.54	8.31033	7.48492e-07	5.99245e-07	3.27101e-07	5.21277e-07	3.86437e-07	2.28082e-07	5.05792e-07	5.02703e-07	2.55785e-07
2487.97	8.31394	5.64824e-06	5.71009e-06	5.90568e-06	4.55125e-06	4.4768e-06	4.52236e-06	4.92769e-06	5.01827e-06	5.09366e-06
2496.4	8.31755	1.88943e-06	1.94098e-06	2.15123e-06	1.70668e-06	1.77476e-06	1.88632e-06	1.63839e-06	1.73469e-06	1.81886e-06
2504.82	8.32116	1.33839e-06	1.31382e-06	1.38483e-06	1.17585e-06	1.2916e-06	1.19589e-06	1.40011e-06	1.23659e-06	1.27313e-06
2513.25	8.32477	1.83463e-06	1.82769e-06	1.67022e-06	1.47818e-06	1.43189e-06	1.4718e-06	1.62229e-06	1.73651e-06	1.5675e-06
