# Supplementary material for: Towards global carbon transparency: Spaceborne imaging spectroscopy enables precise CO2 emission quantification at facility scale
Source: Research Square preprint supplement (doi:10.21203/rs.3.rs-5913782/v1), 2025-01-29
Supplement: Supplementary file 17 [file CO2_k_v25.1.1.xlsx]

## Sheet: k_ZY1E
Wavelength	FWHM	k_Summer_L	k_Summer_M	k_Summer_H	k_Winter_L	k_Winter_M	k_Winter_H	k_1976_L	k_1976_M	k_1976_H
1005.6	16.26	0	0	0	0	0	0	0	0	0	0	0	0	0	0	0	0	0
1022.21	16.26	0	0	0	0	0	0	0	0	0	0	0	0	0	0	0	0	0
1039.19	16.26	3.48045e-07	2.95976e-07	2.95559e-07	2.96819e-07	2.98475e-07	2.89533e-07	2.87447e-07	2.95242e-07	2.79453e-07	2.84363e-07	2.7319e-07	2.76328e-07	2.68813e-07	2.518e-07	2.52858e-07	2.14362e-07	2.40005e-07
1055.87	16.26	7.57774e-07	5.96415e-07	5.98089e-07	5.95536e-07	5.82292e-07	5.78414e-07	5.59769e-07	5.49326e-07	5.03061e-07	4.82336e-07	4.03715e-07	3.70983e-07	3.1812e-07	2.36855e-07	7.47225e-08	-8.01413e-08	-1.98152e-07
1072.55	16.26	9.07779e-08	8.15326e-08	7.85362e-08	7.77156e-08	7.26814e-08	6.87362e-08	7.41373e-08	7.90623e-08	7.33692e-08	6.8358e-08	6.32768e-08	7.25932e-08	7.76788e-08	7.20274e-08	6.19824e-08	5.42379e-08	5.51622e-08
1089.23	16.26	0	-1.63019e-09	-9.62089e-10	-9.10875e-10	-4.36362e-10	-9.43274e-10	5.18596e-10	-1.74825e-09	3.44501e-09	7.71944e-10	6.44126e-10	5.66818e-10	-2.00701e-10	-5.76634e-10	-6.04289e-11	-1.90467e-09	-7.04034e-09
1105.91	16.26	0	7.32989e-11	1.32044e-09	0	1.02214e-10	2.02778e-09	0	4.07354e-10	2.27228e-10	0	8.26673e-10	0	0	0	1.99351e-09	4.36616e-25	2.43781e-09
1122.59	16.26	0	0	-1.0074e-09	2.84928e-09	6.77922e-10	0	-3.1307e-09	1.99063e-09	1.20121e-09	0	0	1.947e-09	-7.43037e-10	-4.05866e-10	-3.15664e-09	2.365e-09	-1.78152e-09
1139.44	16.26	0	1.62821e-09	-1.03209e-09	1.33966e-09	0	2.55798e-10	0	6.34678e-10	0	3.26705e-10	1.83138e-09	-6.15152e-10	-2.26614e-09	0	0	0	2.14914e-10
1156.41	16.26	0	0	-2.92802e-25	-1.64646e-09	0	1.16368e-09	0	0	0	0	0	0	1.14395e-09	0	0	-3.45225e-09	-6.11806e-09
1173.29	16.26	0	0	0	2.06545e-09	0	0	0	0	0	0	0	0	0	0	0	0	0
1190.17	16.26	-1.32615e-09	0	0	0	0	0	1.10984e-26	-1.18843e-09	0	0	0	7.89632e-10	0	-2.5267e-09	0	-5.13585e-09	3.79446e-09
1207.04	16.26	2.49682e-05	2.22072e-05	2.20803e-05	2.19698e-05	2.18712e-05	2.17596e-05	2.1666e-05	2.14694e-05	2.1282e-05	2.10837e-05	2.07545e-05	2.0495e-05	1.99892e-05	1.93159e-05	1.86146e-05	1.69486e-05	1.63888e-05
1223.92	16.26	1.72227e-05	1.50994e-05	1.50245e-05	1.49414e-05	1.48625e-05	1.4776e-05	1.47015e-05	1.45469e-05	1.44058e-05	1.42875e-05	1.40614e-05	1.39089e-05	1.35378e-05	1.30382e-05	1.25243e-05	1.1179e-05	1.1003e-05
1240.8	16.26	5.39161e-07	4.67401e-07	4.64843e-07	4.63802e-07	4.60478e-07	4.58379e-07	4.50213e-07	4.38431e-07	4.36734e-07	4.29828e-07	4.32742e-07	4.45059e-07	4.23387e-07	3.86109e-07	3.87983e-07	3.47673e-07	3.59356e-07
1257.4	16.26	2.24476e-07	2.01267e-07	1.88683e-07	1.88309e-07	1.85552e-07	1.93439e-07	1.93413e-07	1.99279e-07	1.88648e-07	1.76943e-07	1.95454e-07	1.70622e-07	1.55835e-07	1.52955e-07	1.81686e-07	1.80496e-07	2.15998e-07
1274.15	16.26	1.687e-08	1.22439e-08	2.09829e-08	1.91902e-08	8.86892e-09	1.51885e-08	1.14608e-08	7.71937e-09	1.40868e-08	2.03204e-08	8.91261e-09	1.37519e-08	8.35661e-09	1.35513e-08	1.21161e-08	3.24073e-08	2.42531e-08
1290.9	16.26	1.49929e-06	1.20977e-06	1.20111e-06	1.19797e-06	1.18315e-06	1.18461e-06	1.18604e-06	1.17085e-06	1.18409e-06	1.1727e-06	1.18102e-06	1.20565e-06	1.16217e-06	1.08627e-06	8.20116e-07	1.85243e-07	-3.5429e-07
1307.65	16.26	1.52838e-06	1.36088e-06	1.33696e-06	1.33208e-06	1.33081e-06	1.34451e-06	1.33073e-06	1.32363e-06	1.30823e-06	1.30474e-06	1.29244e-06	1.2882e-06	1.24209e-06	1.17749e-06	1.14968e-06	1.23693e-06	1.33005e-06
1324.4	16.26	2.73659e-06	2.46665e-06	2.46398e-06	2.45597e-06	2.45069e-06	2.43413e-06	2.4207e-06	2.39729e-06	2.41305e-06	2.37349e-06	2.35108e-06	2.31663e-06	2.2334e-06	2.16259e-06	2.20928e-06	2.33299e-06	2.48062e-06
1341.16	16.26	2.82064e-06	2.62189e-06	2.60581e-06	2.60646e-06	2.61441e-06	2.5988e-06	2.58927e-06	2.58332e-06	2.55733e-06	2.50779e-06	2.47637e-06	2.4911e-06	2.43755e-06	2.48488e-06	2.52519e-06	2.54965e-06	2.54325e-06
1357.91	16.26	1.6481e-07	1.42222e-07	1.22051e-07	1.68644e-07	1.57263e-07	1.20545e-07	1.29551e-07	1.76526e-07	1.40031e-07	1.31509e-07	1.20714e-07	1.06527e-07	1.14156e-07	1.39829e-07	1.38495e-07	1.35817e-07	1.4087e-07
1374.87	16.26	4.35476e-07	5.09501e-07	5.20197e-07	5.35625e-07	5.50852e-07	5.80673e-07	5.27857e-07	5.48881e-07	6.02685e-07	5.28671e-07	5.27554e-07	5.68878e-07	5.75231e-07	5.01762e-07	5.58039e-07	5.81956e-07	6.32289e-07
1391.65	16.26	1.78568e-08	3.33966e-09	1.06811e-08	6.43222e-09	4.52887e-09	7.08945e-09	5.44914e-09	4.05262e-08	1.17452e-08	4.03383e-09	2.2729e-08	6.63015e-09	1.08091e-08	5.75972e-09	1.13196e-08	1.31249e-08	6.49608e-09
1408.49	16.26	-5.67525e-10	-1.19984e-09	-1.45299e-09	1.09249e-08	2.38622e-09	4.92576e-11	1.26964e-09	2.35126e-09	-2.75831e-10	-2.0126e-09	-1.10024e-09	-3.04664e-09	-9.51774e-12	1.07449e-08	-2.51065e-09	-4.0265e-09	-5.29174e-09
1425.33	16.26	5.27646e-05	4.64082e-05	4.62461e-05	4.6077e-05	4.59296e-05	4.57878e-05	4.56216e-05	4.52459e-05	4.48875e-05	4.45509e-05	4.38062e-05	4.30422e-05	4.21506e-05	4.08205e-05	3.81688e-05	3.51866e-05	3.21562e-05
1442.17	16.26	0.000153166	0.000129277	0.000128722	0.000128149	0.000127569	0.000127028	0.000126434	0.000125309	0.000124143	0.000122975	0.000120711	0.000118376	0.000115724	0.000111604	0.000104418	9.65517e-05	8.93039e-05
1459.01	16.26	1.41528e-06	1.23952e-06	1.24536e-06	1.25769e-06	1.2386e-06	1.22448e-06	1.23499e-06	1.22262e-06	1.21736e-06	1.21872e-06	1.20411e-06	1.19241e-06	1.1968e-06	1.22884e-06	1.24951e-06	1.18396e-06	1.34747e-06
1475.85	16.26	9.28036e-06	9.0593e-06	9.10022e-06	9.07902e-06	9.06723e-06	9.07391e-06	9.05595e-06	9.01458e-06	9.08769e-06	9.06511e-06	9.053e-06	9.10099e-06	9.13412e-06	9.2128e-06	9.52968e-06	9.79339e-06	1.02468e-05
1492.7	16.26	2.45475e-06	2.04517e-06	2.03427e-06	2.01988e-06	2.00156e-06	1.96049e-06	1.92703e-06	1.91948e-06	1.84984e-06	1.83114e-06	1.76168e-06	1.67821e-06	1.59568e-06	1.47786e-06	1.49345e-06	1.16842e-06	1.02416e-06
1509.54	16.26	7.20787e-08	6.37958e-08	5.44662e-08	4.98389e-08	7.54542e-08	4.42534e-08	5.8125e-08	5.7769e-08	4.494e-08	4.87701e-08	5.43865e-08	5.67787e-08	8.47465e-08	8.23268e-08	8.99283e-08	5.88172e-08	7.70055e-08
1526.38	16.26	9.11314e-06	7.79802e-06	7.7498e-06	7.69336e-06	7.63199e-06	7.55822e-06	7.485e-06	7.38732e-06	7.22404e-06	7.07569e-06	6.9982e-06	6.91327e-06	6.5774e-06	6.36531e-06	6.01661e-06	4.11619e-06	4.06624e-06
1543.22	16.26	2.04019e-05	1.83825e-05	1.83028e-05	1.82005e-05	1.80939e-05	1.80337e-05	1.79241e-05	1.77792e-05	1.76384e-05	1.74947e-05	1.72611e-05	1.71481e-05	1.65986e-05	1.59141e-05	1.54692e-05	1.30856e-05	1.31182e-05
1560.06	16.26	1.70208e-06	1.38191e-06	1.31467e-06	1.34417e-06	1.33084e-06	1.32729e-06	1.31096e-06	1.29784e-06	1.29562e-06	1.31535e-06	1.28242e-06	1.29379e-06	1.21239e-06	1.12876e-06	1.0134e-06	1.0143e-06	1.57639e-06
1576.9	16.26	0.000177086	0.000178068	0.000177054	0.00017612	0.000175183	0.000174245	0.000173401	0.000171537	0.000169888	0.000168338	0.000165511	0.000163101	0.000158787	0.000152578	0.000143057	0.000125569	0.000116536
1593.71	16.26	3.3042e-05	3.18994e-05	3.17112e-05	3.15594e-05	3.13755e-05	3.12246e-05	3.10303e-05	3.07484e-05	3.04871e-05	3.0218e-05	2.9788e-05	2.94922e-05	2.855e-05	2.71891e-05	2.51481e-05	2.09158e-05	1.96549e-05
1610.39	16.26	0.000138385	0.000140611	0.000139879	0.00013906	0.000138324	0.00013767	0.000136892	0.000135585	0.00013425	0.000133283	0.000130939	0.000129111	0.000125633	0.000120107	0.000113359	9.73597e-05	9.07576e-05
1627.13	16.26	4.67419e-06	3.8203e-06	3.77604e-06	3.69457e-06	3.61012e-06	3.56639e-06	3.38964e-06	3.28432e-06	3.02275e-06	2.98285e-06	2.88377e-06	2.69563e-06	2.44938e-06	2.00989e-06	1.24357e-06	2.85034e-07	-3.23213e-07
1644.01	16.26	2.99774e-05	2.71193e-05	2.69262e-05	2.67862e-05	2.66452e-05	2.64989e-05	2.63899e-05	2.61517e-05	2.59802e-05	2.58046e-05	2.55738e-05	2.55759e-05	2.4756e-05	2.37364e-05	2.2755e-05	1.90089e-05	2.06204e-05
1660.89	16.26	3.95473e-06	3.37956e-06	3.27212e-06	3.26958e-06	3.19386e-06	3.16528e-06	3.18991e-06	3.11894e-06	3.03569e-06	3.01565e-06	2.98429e-06	3.01123e-06	2.83463e-06	2.51254e-06	2.51553e-06	1.94885e-06	2.24771e-06
1677.77	16.26	3.99847e-07	3.49122e-07	3.72063e-07	3.46436e-07	2.99506e-07	3.57677e-07	3.57865e-07	3.64395e-07	3.26774e-07	3.28942e-07	2.9982e-07	3.04171e-07	2.87548e-07	2.67615e-07	2.52759e-07	2.42701e-07	2.80288e-07
1694.65	16.26	4.93475e-08	4.66892e-08	1.61021e-08	2.12316e-08	3.71068e-08	1.20152e-08	3.31439e-08	1.92339e-08	1.52317e-08	1.75068e-08	1.05933e-08	2.05856e-08	2.52907e-08	3.50517e-08	1.80995e-08	1.576e-08	4.94039e-08
1711.53	16.26	1.50736e-08	4.25944e-09	1.64423e-08	2.45488e-08	3.2925e-08	1.6053e-08	1.48714e-08	1.33071e-08	2.76863e-08	1.99998e-08	1.2174e-08	5.54903e-08	1.63325e-08	1.02016e-08	1.16041e-08	1.52636e-08	2.13047e-08
1728.41	16.26	3.29834e-09	2.98874e-09	-4.80798e-09	2.85132e-08	8.70424e-09	-7.50979e-25	2.67e-09	5.77765e-09	-6.58152e-09	1.27792e-08	-3.42503e-09	2.21228e-08	4.19499e-09	0	1.72854e-09	6.94376e-09	1.06038e-08
1745.28	16.26	0	0	0	6.2811e-09	0	0	0	6.32035e-09	5.15872e-09	0	0	1.14059e-08	0	-5.54864e-09	7.40511e-09	2.43129e-09	4.55776e-09
1762.16	16.26	1.94685e-07	2.47833e-07	1.40063e-07	1.89003e-07	1.74683e-07	2.33588e-07	1.89328e-07	1.70972e-07	2.03262e-07	1.5917e-07	1.01994e-07	1.57363e-07	1.17709e-07	1.37737e-07	1.56714e-07	1.31801e-07	1.71301e-07
1778.85	16.26	2.9311e-08	3.14466e-08	4.13584e-08	2.30481e-08	2.4329e-08	3.01058e-08	4.479e-08	2.63525e-08	2.49574e-08	5.08531e-08	3.73952e-08	1.19886e-08	6.78215e-08	2.70132e-08	3.32448e-08	3.20492e-08	1.52695e-08
1795.43	16.26	1.92727e-07	6.92954e-08	1.07677e-07	9.33667e-08	1.06934e-07	1.35046e-07	1.27571e-07	1.51941e-07	9.02183e-08	1.19222e-07	6.62889e-08	1.47105e-07	1.23523e-07	8.40311e-08	1.38693e-07	1.68918e-07	1.65354e-07
1812.02	16.26	5.99176e-08	2.18481e-08	2.64165e-08	5.04197e-09	7.44307e-09	5.70726e-08	3.76762e-08	5.50787e-08	-9.00251e-10	7.65307e-09	5.87965e-09	3.29e-08	-7.38745e-10	1.53994e-08	2.06324e-08	1.69718e-08	1.2398e-08
1828.82	16.26	1.18787e-08	5.99104e-08	5.88864e-08	6.87257e-08	5.98705e-08	6.51737e-08	6.93983e-08	4.91311e-08	5.56585e-08	6.99118e-08	7.32073e-08	7.61669e-08	7.58386e-08	8.86765e-08	7.72883e-08	6.84865e-08	8.80612e-08
1845.62	16.26	-1.87341e-08	-2.86659e-08	-2.8699e-08	-2.87341e-08	-2.87716e-08	-3.03483e-08	-3.0393e-08	-2.98295e-08	-2.99381e-08	-3.20609e-08	-3.2372e-08	-3.27618e-08	-3.02554e-08	-3.1129e-08	-3.33135e-08	-3.67112e-08	-1.64225e-08
1862.42	16.26	3.44894e-07	6.02329e-07	5.99042e-07	5.89894e-07	6.03218e-07	5.80225e-07	6.47148e-07	6.20525e-07	6.00526e-07	6.11647e-07	6.25708e-07	6.45955e-07	6.745e-07	6.73881e-07	7.18889e-07	8.08768e-07	8.60179e-07
1880.13	16.26	4.5488e-05	3.57457e-05	3.56864e-05	3.56496e-05	3.56264e-05	3.55048e-05	3.55234e-05	3.53828e-05	3.5288e-05	3.51368e-05	3.49078e-05	3.45544e-05	3.42223e-05	3.36608e-05	3.2645e-05	3.15766e-05	3.08442e-05
1896.11	16.26	8.25498e-06	9.07782e-06	9.07451e-06	9.09198e-06	9.09594e-06	9.10279e-06	9.08477e-06	9.10604e-06	9.13795e-06	9.15564e-06	9.15755e-06	9.28831e-06	9.38191e-06	9.5256e-06	1.01384e-05	1.10662e-05	1.20039e-05
1912.97	16.26	1.13304e-06	1.99228e-06	1.98822e-06	2.04539e-06	1.97201e-06	2.04553e-06	2.04782e-06	2.05502e-06	2.09127e-06	2.06988e-06	2.13179e-06	2.12926e-06	2.15676e-06	2.28037e-06	2.46831e-06	2.76709e-06	3.08372e-06
1929.93	16.26	2.93343e-06	2.12513e-06	2.05596e-06	2.07506e-06	2.06203e-06	2.07211e-06	2.05393e-06	2.09576e-06	2.07159e-06	2.03427e-06	2.02341e-06	2.01635e-06	1.9898e-06	2.03647e-06	2.06842e-06	2.25686e-06	2.42503e-06
1946.82	16.26	0.000606697	0.000455093	0.000452152	0.000449166	0.000446127	0.000443084	0.000440044	0.000433923	0.000427787	0.000421574	0.00040896	0.000396171	0.000382953	0.000362005	0.000322968	0.000282554	0.000244691
1963.72	16.26	0.00102379	0.000855783	0.000851394	0.000847027	0.000842698	0.000838249	0.00083383	0.000824946	0.00081605	0.000807015	0.000788729	0.000769893	0.00075017	0.000718555	0.000657319	0.000590668	0.000525524
1980.61	16.26	0.000123704	0.000115432	0.000114762	0.000114147	0.000113614	0.000112969	0.000112419	0.000111048	0.000110021	0.000108993	0.00010665	0.000104575	0.000101694	9.70058e-05	8.85921e-05	7.60678e-05	6.72924e-05
1997.51	16.26	0.000543352	0.000498258	0.00049753	0.000496614	0.00049587	0.000495119	0.00049422	0.000492565	0.000490799	0.000489037	0.000485365	0.000481185	0.000476109	0.000467232	0.000446833	0.000419945	0.000394144
2014.4	16.26	0.00231507	0.00184865	0.00183825	0.00182774	0.00181708	0.00180643	0.00179562	0.00177387	0.00175176	0.0017291	0.00168253	0.00163358	0.00158566	0.00150704	0.00134908	0.00118683	0.00102692
2031.3	16.26	0.000384411	0.000344217	0.000342177	0.000340059	0.000338079	0.000336055	0.000334114	0.000330178	0.000326471	0.000322854	0.0003159	0.00030929	0.000300517	0.00028753	0.00026508	0.000229323	0.000210594
2048.13	16.26	0.000590542	0.000546737	0.000544284	0.000541535	0.000538945	0.000536465	0.000533887	0.000528607	0.000523039	0.000517685	0.000506934	0.000496233	0.000484979	0.000466721	0.00042982	0.000385368	0.000346559
2064.9	16.26	0.000778833	0.000697715	0.000693808	0.000690109	0.000686274	0.000682506	0.000678645	0.000670891	0.000663159	0.000655092	0.000638845	0.000621941	0.000606203	0.000580441	0.000528314	0.000473872	0.000418423
2081.61	16.26	0.000357687	0.000328819	0.000326868	0.000324963	0.000322997	0.000321172	0.000319248	0.000315681	0.000312406	0.000309026	0.000303045	0.000297859	0.000289187	0.000276017	0.000254475	0.0002182	0.000202147
2098.45	16.26	8.33092e-05	7.33545e-05	7.27932e-05	7.2413e-05	7.19264e-05	7.14938e-05	7.10214e-05	7.01679e-05	6.97622e-05	6.9196e-05	6.87489e-05	6.83757e-05	6.58017e-05	6.25757e-05	5.89067e-05	4.18446e-05	5.29756e-05
2115.29	16.26	2.04778e-05	1.7752e-05	1.76076e-05	1.73048e-05	1.72351e-05	1.69284e-05	1.67914e-05	1.66675e-05	1.63576e-05	1.59268e-05	1.5497e-05	1.54186e-05	1.47352e-05	1.37707e-05	1.12202e-05	5.04218e-06	3.51564e-06
2132.13	16.26	2.11873e-06	1.90141e-06	1.76646e-06	1.784e-06	1.72513e-06	1.59233e-06	1.61847e-06	1.56776e-06	1.55684e-06	1.53198e-06	1.47969e-06	1.45663e-06	1.32195e-06	1.12767e-06	9.45609e-07	-5.41037e-07	-6.69443e-08
2148.97	16.26	1.25547e-05	1.09185e-05	1.07845e-05	1.05134e-05	1.06199e-05	1.0275e-05	1.02189e-05	1.00729e-05	9.74259e-06	9.59949e-06	9.06876e-06	8.85749e-06	8.78835e-06	9.25395e-06	1.22343e-05	1.20499e-05	1.86661e-05
2165.81	16.26	1.05673e-05	9.01931e-06	8.92465e-06	8.90141e-06	8.63908e-06	8.55961e-06	8.52266e-06	8.11135e-06	8.05278e-06	7.75031e-06	7.28219e-06	7.03023e-06	6.28263e-06	4.95531e-06	2.64432e-06	2.62573e-06	8.70039e-06
2182.64	16.26	1.07737e-06	8.73204e-07	8.94931e-07	8.96912e-07	7.55299e-07	7.88415e-07	7.92599e-07	9.61334e-07	8.44019e-07	7.58016e-07	7.46836e-07	7.62653e-07	7.10221e-07	6.43526e-07	5.66594e-07	8.92043e-08	8.77056e-08
2199.48	16.26	2.85505e-07	2.04539e-07	3.05365e-07	3.063e-07	2.39473e-07	2.1659e-07	2.15112e-07	1.60063e-07	3.12053e-07	2.12225e-07	2.24206e-07	2.1506e-07	2.21641e-07	1.79887e-07	2.33749e-07	2.53795e-07	2.84597e-07
2216.32	16.26	2.44184e-07	1.17066e-07	2.04225e-07	2.54894e-07	1.77512e-07	2.4362e-07	2.27761e-07	2.13594e-07	2.7636e-07	2.11275e-07	2.19774e-07	2.2124e-07	2.21697e-07	1.97803e-07	2.31783e-07	1.1214e-07	2.46358e-07
2233.16	16.26	2.32685e-08	1.24226e-07	8.83415e-08	1.25278e-07	1.4458e-07	1.01952e-07	2.18273e-08	6.81665e-08	6.023e-08	7.79447e-08	6.7417e-08	5.18746e-08	6.00821e-08	6.86545e-08	2.97074e-08	2.62044e-08	3.49163e-08
2250	16.26	8.77605e-08	1.17789e-07	1.6684e-07	1.29898e-07	1.66623e-07	1.44176e-07	1.68473e-07	1.15334e-07	1.265e-07	1.22827e-07	1.22181e-07	1.25071e-07	1.19002e-07	1.22044e-07	9.31955e-08	2.04517e-07	7.48023e-08
2266.84	16.26	7.41152e-08	2.9205e-08	3.89955e-08	4.39792e-08	6.01517e-09	3.83196e-08	7.64754e-08	4.38354e-08	4.3578e-08	4.36416e-08	3.19412e-08	3.44919e-08	6.29187e-08	5.53712e-08	3.32716e-08	9.3735e-08	1.96779e-08
2283.67	16.26	3.21051e-24	1.10709e-24	1.45312e-08	5.34898e-08	1.40152e-08	2.03065e-08	1.24208e-08	3.34316e-08	2.64328e-08	1.69516e-08	4.86018e-08	2.28643e-08	3.72071e-08	2.79016e-08	6.44591e-09	7.48914e-08	-1.15448e-08
2300.51	16.26	0	3.47388e-09	5.62558e-09	2.77007e-09	6.29449e-09	4.67775e-09	2.70603e-09	3.35247e-09	2.7946e-09	6.60221e-09	3.90745e-09	0	9.36206e-09	1.55395e-08	5.94309e-08	3.15103e-09	-1.8484e-09
2317.35	16.26	0	0	-2.32361e-09	2.4003e-08	1.01806e-08	3.69734e-09	1.63379e-08	4.87166e-09	2.41967e-09	3.51161e-09	8.15748e-09	8.24634e-09	0	-7.61959e-09	0	-1.34166e-08	-3.14311e-10
2334.19	16.26	0	0	0	-2.67724e-09	0	-1.36923e-09	2.9561e-25	2.15796e-09	-3.18261e-09	-1.69504e-09	0	-2.98133e-09	0	-6.63219e-09	0	0	7.7121e-09
2350.4	16.26	0	0	7.28132e-09	-2.93386e-09	7.04877e-09	1.04823e-08	2.45331e-25	5.24138e-09	7.37806e-10	3.36394e-09	5.55898e-09	0	0	5.76052e-09	0	0	8.4049e-09
2366.68	16.26	0	-1.51496e-09	7.49289e-09	2.73854e-09	0	0	0	1.81773e-09	1.35264e-24	-3.8728e-25	-9.8241e-09	0	1.52132e-08	0	1.33699e-24	2.84269e-08	-1.25841e-09
2384.12	16.26	0	-4.10246e-09	2.79443e-09	-7.10734e-09	0	9.72593e-09	-3.68482e-09	7.80582e-09	6.31286e-09	6.47479e-09	1.56176e-24	7.0587e-09	-7.12733e-09	0	5.0835e-09	0	-1.35753e-08
2400.81	16.26	0	4.87575e-09	2.95953e-09	0	3.79988e-09	5.10832e-09	-2.47389e-09	0	4.66424e-09	0	0	0	0	9.80283e-09	0	0	2.7848e-08
2417.5	16.26	2.59428e-09	1.50529e-09	0	6.71691e-09	1.7204e-09	1.17155e-08	0	1.92144e-09	1.96882e-24	7.5004e-09	2.82334e-09	3.21027e-09	1.50673e-08	1.89056e-08	3.54396e-08	-7.06769e-09	-8.42841e-09
2434.19	16.26	3.95475e-09	2.64958e-09	5.18993e-09	7.62596e-09	0	1.4815e-09	6.04483e-09	3.81419e-09	2.22032e-09	0	1.22007e-08	5.31858e-09	5.08193e-09	7.46911e-09	0	6.24784e-09	-4.9592e-09
2450.88	16.26	4.47266e-09	2.91609e-08	5.48046e-09	6.92832e-09	1.03864e-08	8.56977e-09	5.0108e-09	1.41708e-08	8.52139e-09	0	9.5157e-09	1.88225e-08	0	6.94524e-09	4.54417e-08	0	9.73469e-09
2467.57	16.26	1.53677e-09	6.62339e-08	2.98025e-08	1.04999e-08	2.86423e-08	5.27566e-08	5.55084e-08	7.94814e-08	2.24774e-08	5.97322e-08	4.35394e-08	6.33709e-08	3.21161e-08	3.96648e-08	1.77085e-08	1.62093e-08	5.11727e-08
2484.32	16.26	2.70751e-06	2.70034e-06	2.70399e-06	2.6802e-06	2.66836e-06	2.67969e-06	2.71011e-06	2.70294e-06	2.70095e-06	2.75915e-06	2.76596e-06	2.78508e-06	2.82274e-06	2.91142e-06	3.2459e-06	4.08388e-06	5.18691e-06
2501.08	16.26	1.62705e-06	1.44572e-06	1.45232e-06	1.42318e-06	1.46208e-06	1.42778e-06	1.44453e-06	1.39718e-06	1.42899e-06	1.42727e-06	1.39546e-06	1.35575e-06	1.3207e-06	1.34509e-06	1.31571e-06	1.42233e-06	1.49652e-06

## Sheet: k_ZY1F
Wavelength	FWHM	k_Summer_L	k_Summer_M	k_Summer_H	k_Winter_L	k_Winter_M	k_Winter_H	k_1976_L	k_1976_M	k_1976_H
1009.7	16.848	0	0	0	0	0	0	0	0	0	0	0	0	0	0	0	0	0
1026.55	16.846	0	0	0	0	0	0	0	0	0	0	0	0	0	0	0	0	0
1043.4	16.846	6.09617e-07	4.78938e-07	4.81757e-07	4.76501e-07	4.78256e-07	4.71758e-07	4.62471e-07	4.64448e-07	4.36857e-07	4.31582e-07	3.96648e-07	3.85636e-07	3.42928e-07	2.71262e-07	1.78702e-07	5.87742e-08	3.34926e-08
1060.24	16.849	3.65347e-07	3.00846e-07	2.97801e-07	3.00967e-07	2.8976e-07	2.908e-07	2.79825e-07	2.81465e-07	2.60106e-07	2.54266e-07	2.15642e-07	2.18272e-07	2.03027e-07	1.90873e-07	1.39521e-07	1.03044e-07	6.07636e-08
1077.09	16.845	2.31223e-08	2.53191e-08	2.32035e-08	2.31344e-08	1.99335e-08	1.49634e-08	1.86059e-08	2.27718e-08	2.13646e-08	1.72528e-08	1.28713e-08	1.48012e-08	2.84698e-08	2.34118e-08	2.08207e-08	9.52776e-09	1.01829e-08
1093.94	16.845	0	-1.18438e-09	-8.83305e-11	-1.12566e-09	-3.51884e-10	1.14179e-10	1.60633e-09	-6.7126e-10	4.00643e-09	2.01217e-25	1.37032e-10	9.26738e-10	-4.33799e-10	-6.5661e-10	-4.02014e-10	-2.83373e-09	-4.20678e-09
1110.78	16.848	0	1.61983e-10	7.79365e-10	7.47264e-10	0	1.89588e-09	0	2.68969e-09	-2.57901e-10	0	2.41607e-09	2.51117e-10	-3.40608e-10	-2.01388e-10	9.98659e-10	2.82196e-09	1.08183e-09
1127.63	16.848	0	2.5558e-09	-1.86923e-09	3.7948e-09	2.04101e-09	1.8272e-10	-2.03289e-09	7.58276e-10	2.6865e-09	1.85212e-09	2.10691e-09	2.10482e-09	-3.82316e-09	0	0	0	1.68593e-10
1144.48	16.845	0	2.66922e-11	-5.66772e-25	0	0	1.14241e-09	0	0	0	-7.51629e-10	-7.4937e-10	0	1.09472e-09	0	0	-3.5168e-09	-6.16466e-09
1161.32	16.849	0	0	0	-8.77975e-10	0	0	0	0	0	0	0	0	0	0	0	0	0
1178.17	16.845	0	0	0	1.62383e-09	0	0	0	0	0	0	0	0	0	0	0	0	0
1195.02	16.848	2.86521e-07	2.48914e-07	2.44333e-07	2.42962e-07	2.3766e-07	2.38053e-07	2.39808e-07	2.33901e-07	2.31995e-07	2.28149e-07	2.2242e-07	2.23038e-07	2.13099e-07	2.01491e-07	1.94554e-07	1.69037e-07	1.63071e-07
1211.86	16.845	2.40215e-05	2.1294e-05	2.1173e-05	2.10644e-05	2.09646e-05	2.08498e-05	2.07435e-05	2.05459e-05	2.03575e-05	2.01626e-05	1.98491e-05	1.95876e-05	1.91203e-05	1.84875e-05	1.78915e-05	1.60986e-05	1.55413e-05
1228.71	16.848	7.90055e-06	6.88334e-06	6.84953e-06	6.8124e-06	6.77466e-06	6.72748e-06	6.69748e-06	6.61859e-06	6.54071e-06	6.49044e-06	6.37542e-06	6.31247e-06	6.12155e-06	5.85426e-06	5.55687e-06	4.91515e-06	4.90253e-06
1245.56	16.848	2.29677e-07	1.99676e-07	1.98203e-07	1.92425e-07	1.9331e-07	1.95742e-07	1.90787e-07	1.82177e-07	1.81608e-07	1.78536e-07	1.92513e-07	1.88984e-07	1.83292e-07	1.54219e-07	1.90218e-07	1.63264e-07	1.87386e-07
1262.4	16.846	2.17726e-07	1.92751e-07	1.91525e-07	1.94934e-07	1.79236e-07	1.86356e-07	1.84039e-07	1.85752e-07	1.77842e-07	1.7661e-07	1.77831e-07	1.67442e-07	1.44623e-07	1.53967e-07	1.75909e-07	1.83549e-07	1.96824e-07
1279.25	16.845	3.51532e-08	2.46158e-08	2.39866e-08	2.58217e-08	2.48674e-08	1.83528e-08	1.99972e-08	1.83307e-08	1.40252e-08	2.27526e-08	2.50764e-08	2.31199e-08	1.1206e-08	1.31834e-08	1.79128e-08	2.39857e-08	2.17084e-08
1296.09	16.849	1.34574e-06	1.06675e-06	1.05898e-06	1.04934e-06	1.03744e-06	1.04296e-06	1.04946e-06	1.03584e-06	1.06146e-06	1.0472e-06	1.04485e-06	1.06713e-06	1.01738e-06	9.21648e-07	5.99981e-07	-3.92553e-09	-4.88627e-07
1312.94	16.845	4.46389e-06	4.04308e-06	4.01636e-06	3.99708e-06	3.99576e-06	4.00339e-06	3.96962e-06	3.94498e-06	3.91676e-06	3.88453e-06	3.87468e-06	3.82743e-06	3.72178e-06	3.5794e-06	3.50192e-06	3.69563e-06	4.14785e-06
1329.79	16.846	7.55688e-07	6.65935e-07	6.79021e-07	6.67006e-07	6.58214e-07	6.55344e-07	6.49604e-07	6.38771e-07	6.54119e-07	6.14049e-07	5.8146e-07	5.96515e-07	5.48678e-07	5.15225e-07	5.466e-07	5.54007e-07	4.0984e-07
1346.63	16.848	2.58592e-06	2.05762e-06	2.03958e-06	2.06013e-06	2.06127e-06	2.02318e-06	2.00883e-06	2.04173e-06	1.9667e-06	1.95634e-06	1.90154e-06	1.86466e-06	1.80481e-06	1.85909e-06	1.83184e-06	1.75813e-06	1.73051e-06
1363.48	16.848	3.1618e-07	3.14781e-07	3.05713e-07	3.11684e-07	3.17082e-07	3.11402e-07	3.12978e-07	3.20879e-07	3.19028e-07	3.05574e-07	3.15489e-07	3.20954e-07	3.17031e-07	3.1429e-07	3.17822e-07	3.33492e-07	3.54254e-07
1380.33	16.845	2.37383e-07	2.28833e-07	2.44431e-07	2.53113e-07	2.55116e-07	2.84507e-07	2.46175e-07	2.64695e-07	2.99476e-07	2.38444e-07	2.39824e-07	2.71627e-07	2.73657e-07	2.14483e-07	2.4649e-07	2.52329e-07	2.79732e-07
1397.17	16.848	-1.71942e-09	-1.81418e-09	3.33875e-09	-2.93662e-09	4.40776e-09	3.89782e-09	1.68891e-09	2.06088e-08	6.1734e-09	3.8828e-10	8.19627e-09	2.45827e-09	-2.81776e-10	-1.84759e-09	2.89428e-09	4.14989e-09	-1.00709e-08
1414.02	16.848	3.44987e-08	-2.68217e-10	-8.97044e-10	1.0108e-08	-7.64798e-10	-7.33594e-10	1.56011e-08	6.27157e-10	-8.451e-09	-1.11872e-09	5.28564e-09	1.47152e-08	4.29569e-09	4.56252e-09	3.7029e-10	3.68852e-09	-1.13412e-09
1430.87	16.845	0.000155649	0.000136478	0.000135966	0.000135462	0.000134956	0.000134465	0.000133948	0.000132861	0.000131752	0.000130654	0.000128374	0.000125989	0.000123311	0.000119159	0.000111119	0.000102186	9.32653e-05
1447.71	16.846	5.72897e-05	4.91566e-05	4.90009e-05	4.88065e-05	4.86243e-05	4.84539e-05	4.82675e-05	4.79505e-05	4.76141e-05	4.72399e-05	4.66291e-05	4.60207e-05	4.5248e-05	4.40022e-05	4.21271e-05	4.00066e-05	3.83446e-05
1464.56	16.846	2.00757e-06	1.8628e-06	1.87329e-06	1.88484e-06	1.85356e-06	1.85772e-06	1.87878e-06	1.8649e-06	1.86069e-06	1.86006e-06	1.8628e-06	1.83988e-06	1.83272e-06	1.86605e-06	1.86197e-06	1.7835e-06	1.87657e-06
1481.41	16.846	5.58594e-06	5.5677e-06	5.5751e-06	5.58626e-06	5.5664e-06	5.5718e-06	5.55896e-06	5.54854e-06	5.61227e-06	5.61063e-06	5.59143e-06	5.64322e-06	5.67856e-06	5.72807e-06	6.03824e-06	6.29037e-06	6.66261e-06
1498.25	16.849	2.20116e-06	1.8914e-06	1.89463e-06	1.87904e-06	1.87156e-06	1.82636e-06	1.80477e-06	1.79126e-06	1.71892e-06	1.69351e-06	1.65791e-06	1.56761e-06	1.52567e-06	1.44984e-06	1.43301e-06	1.08848e-06	9.91855e-07
1515.1	16.844	9.05101e-08	3.25053e-08	6.317e-08	5.20692e-08	4.38651e-08	4.83173e-08	4.92629e-08	5.27818e-08	4.72302e-08	3.31942e-08	5.68839e-08	3.90696e-08	4.47313e-08	1.35855e-08	7.05179e-08	1.86564e-08	3.65602e-08
1531.94	16.848	2.32107e-05	2.05467e-05	2.04128e-05	2.02918e-05	2.01791e-05	2.0033e-05	1.99031e-05	1.96894e-05	1.94359e-05	1.92346e-05	1.90016e-05	1.88968e-05	1.81585e-05	1.74817e-05	1.66918e-05	1.34018e-05	1.35971e-05
1548.79	16.848	7.37705e-06	6.55974e-06	6.51614e-06	6.50738e-06	6.44317e-06	6.42124e-06	6.39489e-06	6.34832e-06	6.30036e-06	6.21788e-06	6.07896e-06	5.99917e-06	5.80467e-06	5.5491e-06	5.43788e-06	4.53505e-06	4.36968e-06
1565.64	16.846	6.56633e-05	6.44126e-05	6.40237e-05	6.36999e-05	6.33793e-05	6.30259e-05	6.27065e-05	6.20122e-05	6.14684e-05	6.09153e-05	5.99356e-05	5.90037e-05	5.73062e-05	5.48457e-05	5.11366e-05	4.53471e-05	4.31852e-05
1582.49	16.845	9.11845e-05	9.06286e-05	9.01037e-05	8.9623e-05	8.91182e-05	8.86877e-05	8.82241e-05	8.73016e-05	8.64612e-05	8.57081e-05	8.42519e-05	8.30816e-05	8.09566e-05	7.78538e-05	7.34633e-05	6.40585e-05	6.01829e-05
1599.33	16.848	0.000104714	0.000105992	0.000105425	0.000104885	0.00010438	0.000103869	0.00010334	0.000102355	0.000101428	0.000100596	9.90101e-05	9.77753e-05	9.50596e-05	9.08323e-05	8.45464e-05	7.25732e-05	6.71672e-05
1616.18	16.846	6.47308e-05	6.32487e-05	6.28315e-05	6.24593e-05	6.20498e-05	6.17667e-05	6.12822e-05	6.06117e-05	5.99016e-05	5.94058e-05	5.81483e-05	5.71983e-05	5.55352e-05	5.31982e-05	5.08853e-05	4.30713e-05	4.07913e-05
1633.03	16.846	7.61352e-06	6.74075e-06	6.69554e-06	6.59342e-06	6.52048e-06	6.47219e-06	6.36692e-06	6.25213e-06	6.0838e-06	5.99829e-06	5.93555e-06	5.83916e-06	5.59597e-06	5.1039e-06	4.25761e-06	2.21778e-06	1.99023e-06
1649.87	16.848	2.43916e-05	2.21386e-05	2.19852e-05	2.18884e-05	2.17866e-05	2.16657e-05	2.16197e-05	2.1457e-05	2.13141e-05	2.11909e-05	2.1068e-05	2.11213e-05	2.04409e-05	1.95534e-05	1.90815e-05	1.64287e-05	1.81799e-05
1666.72	16.845	1.92352e-06	1.63615e-06	1.59829e-06	1.60068e-06	1.53861e-06	1.5613e-06	1.53443e-06	1.50053e-06	1.45737e-06	1.47432e-06	1.46616e-06	1.48295e-06	1.35579e-06	1.20303e-06	9.81793e-07	5.29739e-07	5.42126e-07
1683.56	16.849	1.86043e-07	1.70412e-07	1.67762e-07	1.47238e-07	1.10434e-07	1.49027e-07	1.81984e-07	1.81173e-07	1.35432e-07	1.55596e-07	1.51845e-07	1.44335e-07	1.42814e-07	9.29505e-08	1.17466e-07	1.18631e-07	1.27134e-07
1700.41	16.845	1.67938e-08	7.89092e-09	1.04783e-08	1.47808e-08	1.71019e-08	1.13089e-08	1.36074e-08	7.97478e-09	5.96308e-09	1.10072e-08	0	3.11144e-08	1.74787e-08	1.18248e-08	1.27074e-08	9.30715e-09	2.34772e-08
1717.26	16.846	9.74948e-09	7.476e-09	2.88418e-09	2.88827e-08	1.98983e-08	1.41406e-09	0	2.98565e-09	3.27611e-08	2.52706e-08	1.09284e-08	2.09023e-08	1.40599e-08	2.11169e-08	3.67817e-09	6.3239e-09	1.81874e-08
1734.1	16.849	0	6.43048e-09	-4.25021e-09	7.06916e-09	0	-9.5823e-25	1.57785e-09	1.14526e-08	8.22775e-09	0	-1.89555e-09	3.83515e-08	0	-2.76651e-09	5.56297e-09	2.84781e-09	1.02237e-08
1750.95	16.845	1.23048e-07	1.28144e-07	7.63358e-08	1.04123e-07	9.67248e-08	1.22402e-07	1.06422e-07	1.01143e-07	1.04001e-07	8.11236e-08	8.58346e-08	9.81197e-08	6.71351e-08	7.52773e-08	1.01783e-07	8.15864e-08	1.13951e-07
1767.8	16.845	1.00611e-07	1.3905e-07	1.02337e-07	1.08476e-07	1.14393e-07	1.13439e-07	1.05261e-07	9.23976e-08	1.26994e-07	1.11521e-07	4.68217e-08	7.5865e-08	9.88356e-08	1.15495e-07	8.62178e-08	7.68724e-08	7.91391e-08
1784.64	16.849	1.63796e-07	7.87289e-08	1.04971e-07	8.15074e-08	7.73185e-08	9.31793e-08	1.45934e-07	1.25627e-07	8.43428e-08	1.33524e-07	1.0194e-07	7.90523e-08	1.71983e-07	6.41081e-08	1.15059e-07	1.43276e-07	1.44907e-07
1801.49	16.845	1.09688e-07	5.20191e-08	7.9159e-08	5.62254e-08	6.1314e-08	1.23089e-07	6.9806e-08	1.13455e-07	5.54929e-08	6.89498e-08	3.40064e-08	8.75112e-08	5.69012e-08	6.61544e-08	9.63056e-08	1.09107e-07	1.10893e-07
1818.34	16.846	5.59548e-09	8.70426e-09	-2.01074e-08	-1.30123e-08	-1.84197e-08	-2.04676e-09	4.55814e-10	-2.02655e-08	-2.47623e-08	-1.78119e-08	-9.87649e-09	-4.22394e-09	-2.26588e-08	-1.87494e-08	-1.88633e-08	-5.88648e-08	-5.6298e-08
1835.18	16.849	3.91547e-08	6.73579e-08	6.38984e-08	6.74822e-08	6.48917e-08	6.76264e-08	6.50399e-08	4.75987e-08	5.52251e-08	6.71536e-08	6.04243e-08	7.0382e-08	6.96956e-08	8.30781e-08	6.00455e-08	6.57212e-08	6.01392e-08
1852.03	16.846	-4.35604e-08	-6.40849e-08	-6.50023e-08	-6.50768e-08	-6.51565e-08	-6.67119e-08	-6.68047e-08	-6.63765e-08	-6.69943e-08	-5.19903e-08	-6.72428e-08	-6.80287e-08	-5.41078e-08	-6.91662e-08	-7.39832e-08	-8.26159e-08	-7.47961e-08
1868.88	16.845	3.93197e-06	6.47381e-06	6.48177e-06	6.4875e-06	6.53972e-06	6.50698e-06	6.55803e-06	6.58352e-06	6.59373e-06	6.59152e-06	6.69564e-06	6.77484e-06	6.88124e-06	7.0783e-06	7.5389e-06	8.22687e-06	8.77463e-06
1885.72	16.848	3.39616e-05	2.87295e-05	2.86956e-05	2.86597e-05	2.86309e-05	2.85461e-05	2.85926e-05	2.84804e-05	2.84398e-05	2.83615e-05	2.81965e-05	2.80211e-05	2.78226e-05	2.75058e-05	2.70058e-05	2.65762e-05	2.64097e-05
1902.57	16.845	3.53512e-06	4.42532e-06	4.39308e-06	4.45358e-06	4.41398e-06	4.42515e-06	4.41013e-06	4.45111e-06	4.48384e-06	4.46584e-06	4.46979e-06	4.556e-06	4.59523e-06	4.69046e-06	5.06262e-06	5.5712e-06	6.07903e-06
1919.41	16.848	5.32962e-07	6.44592e-07	6.65565e-07	6.59314e-07	6.38826e-07	7.05283e-07	6.85107e-07	7.09318e-07	7.23927e-07	6.79258e-07	6.87794e-07	6.7669e-07	6.62415e-07	7.27916e-07	7.56167e-07	8.22703e-07	9.53993e-07
1936.26	16.849	7.51286e-05	4.29428e-05	4.24703e-05	4.21076e-05	4.16321e-05	4.12133e-05	4.08063e-05	3.99842e-05	3.91695e-05	3.83671e-05	3.67556e-05	3.52371e-05	3.36725e-05	3.14171e-05	2.78712e-05	2.49163e-05	2.26397e-05
1953.11	16.845	0.00106937	0.000846465	0.000841877	0.000837198	0.000832495	0.000827741	0.000822934	0.000813308	0.000803513	0.000793535	0.000773168	0.000752073	0.000730111	0.00069451	0.000625263	0.000550747	0.000480315
1969.96	16.845	0.000612745	0.000540516	0.00053794	0.000535415	0.000532883	0.000530334	0.000527732	0.000522632	0.000517546	0.000512317	0.000501788	0.000491059	0.000479346	0.0004606	0.0004241	0.000383418	0.000342305
1986.8	16.846	5.72356e-05	5.04819e-05	5.02212e-05	4.99673e-05	4.983e-05	4.95821e-05	4.94599e-05	4.89085e-05	4.87097e-05	4.85683e-05	4.82899e-05	4.82245e-05	4.71911e-05	4.56565e-05	4.42448e-05	3.96846e-05	4.16257e-05
2003.65	16.846	0.00194851	0.00163044	0.00162302	0.00161559	0.00160804	0.00160035	0.0015926	0.00157683	0.00156061	0.00154398	0.00150919	0.00147204	0.00143478	0.00137262	0.00124344	0.00110384	0.000968652
2020.49	16.848	0.00122491	0.00105078	0.00104575	0.00104077	0.00103562	0.00103057	0.00102544	0.00101502	0.00100456	0.000993873	0.000971801	0.000948705	0.000925783	0.000888025	0.000811157	0.000728523	0.000641797
2037.34	16.846	0.000298421	0.00027384	0.000272419	0.000270788	0.000269307	0.000267778	0.000266402	0.000263497	0.000260895	0.000258518	0.000254235	0.000251104	0.000244444	0.00023484	0.000220272	0.000188366	0.000181038
2054.19	16.848	0.000850838	0.000774915	0.000771006	0.00076699	0.000763045	0.000759131	0.000755057	0.000746864	0.000738508	0.000729763	0.000712229	0.000693544	0.000676679	0.000648904	0.000591216	0.000532997	0.000470981
2071.03	16.845	0.000708972	0.000638999	0.000635438	0.000632055	0.000628373	0.000625043	0.000621541	0.000614591	0.00060758	0.000600459	0.000585941	0.000571034	0.000556605	0.000533311	0.00048698	0.000435113	0.000384267
2087.88	16.846	0.000251028	0.000226065	0.00022461	0.000223118	0.000221669	0.000220275	0.000218849	0.000216056	0.000213626	0.000211176	0.000207092	0.000204003	0.000197206	0.000187512	0.000173753	0.000143149	0.000139358
2104.73	16.846	4.1566e-05	3.72585e-05	3.69817e-05	3.68952e-05	3.6735e-05	3.6564e-05	3.63648e-05	3.60918e-05	3.6214e-05	3.59459e-05	3.62126e-05	3.61323e-05	3.50739e-05	3.36546e-05	3.01271e-05	2.08028e-05	3.18041e-05
2121.57	16.849	8.70777e-06	7.26719e-06	7.15887e-06	6.91895e-06	6.8086e-06	6.54605e-06	6.42972e-06	6.35211e-06	6.06349e-06	5.85701e-06	5.4797e-06	5.34686e-06	4.75136e-06	4.03501e-06	3.28895e-06	-9.78085e-07	-1.84556e-06
2138.42	16.845	2.5507e-06	2.12441e-06	2.15323e-06	1.99143e-06	2.04238e-06	1.92643e-06	2.00439e-06	1.83867e-06	1.65984e-06	1.64958e-06	1.29195e-06	1.28151e-06	1.00977e-06	7.72298e-07	6.88041e-07	4.46287e-08	1.93782e-06
2155.27	16.848	1.41977e-05	1.24028e-05	1.21116e-05	1.2e-05	1.20413e-05	1.17755e-05	1.14431e-05	1.12693e-05	1.09251e-05	1.07775e-05	1.02721e-05	9.89166e-06	9.63538e-06	9.48419e-06	1.0469e-05	9.8885e-06	1.62957e-05
2172.11	16.846	5.55044e-06	4.75869e-06	4.7498e-06	4.79247e-06	4.5578e-06	4.50985e-06	4.59895e-06	4.34645e-06	4.34792e-06	4.13176e-06	3.8162e-06	3.74747e-06	3.27436e-06	2.23917e-06	6.35812e-07	-2.54166e-06	-3.66014e-06
2188.96	16.846	7.54787e-07	6.43538e-07	6.38861e-07	7.4353e-07	5.90159e-07	6.29265e-07	5.75941e-07	6.77493e-07	6.47422e-07	5.91916e-07	6.09131e-07	6.24517e-07	6.15972e-07	5.89025e-07	5.98393e-07	4.5152e-07	6.4352e-07
2205.81	16.845	2.08059e-07	1.39526e-07	2.13635e-07	2.1236e-07	1.01438e-07	1.76695e-07	1.31344e-07	1.05972e-07	1.57547e-07	1.52795e-07	1.49835e-07	1.56871e-07	1.43949e-07	1.12153e-07	1.52267e-07	1.05075e-07	2.02711e-07
2222.65	16.85	1.23449e-07	8.31638e-08	2.18136e-07	1.68543e-07	1.3015e-07	2.27693e-07	1.57913e-07	1.3672e-07	2.75456e-07	1.54004e-07	1.56881e-07	1.44218e-07	1.55932e-07	1.53024e-07	1.64285e-07	8.1871e-08	1.82235e-07
2239.5	16.846	1.38752e-08	5.51285e-08	5.59589e-08	9.76819e-08	2.71559e-08	6.26903e-08	1.09363e-08	1.72955e-08	2.64797e-08	4.24295e-08	3.402e-08	2.70677e-08	4.04669e-08	4.38256e-08	2.03243e-08	3.51268e-08	9.66776e-09
2256.35	16.845	1.30936e-07	1.40102e-07	1.29998e-07	1.99302e-07	1.82189e-07	1.74813e-07	2.76406e-07	1.43221e-07	1.4302e-07	1.398e-07	1.42137e-07	1.38895e-07	1.2761e-07	1.45544e-07	1.06812e-07	2.30855e-07	9.97697e-08
2273.19	16.846	1.96153e-08	-1.40913e-08	3.90551e-08	4.37207e-08	1.39857e-08	1.6166e-08	1.68961e-08	4.85532e-08	4.05907e-08	3.03951e-08	2.80495e-08	2.69737e-08	5.45405e-08	3.00315e-08	1.56184e-08	9.31134e-08	1.92561e-08
2290.04	16.848	0	1.97967e-24	1.41895e-08	7.8186e-09	5.64235e-09	4.37805e-09	3.41081e-09	1.28956e-08	4.47896e-09	7.07014e-09	2.70913e-08	6.72086e-09	1.8813e-08	2.83131e-08	3.04999e-08	4.01193e-08	-8.22731e-09
2306.89	16.845	0	1.79494e-09	0	3.19974e-08	0	6.25147e-09	2.07056e-08	1.8212e-09	9.55355e-09	4.78381e-09	2.86074e-09	0	8.05355e-09	-3.49892e-09	1.63768e-08	6.89293e-09	-1.22039e-08
2323.73	16.848	0	0	-3.13435e-09	0	1.19537e-08	-1.98509e-10	2.47778e-09	2.52094e-09	1.69458e-09	2.37991e-09	0	5.73189e-09	0	0	0	0	7.20204e-09
2340.58	16.846	0	0	1.73822e-09	-7.68752e-09	6.55343e-10	1.34717e-08	1.23167e-24	7.53624e-09	-2.78356e-09	6.82374e-09	8.92238e-09	0	0	-1.3723e-08	0	0	1.18786e-08
2357.43	16.848	0	0	2.8869e-09	1.98017e-09	5.69767e-09	2.15983e-09	0	8.37807e-10	8.3637e-10	-1.68326e-09	0	0	-6.24497e-09	1.46718e-08	0	4.73178e-08	3.03433e-09
2374.27	16.846	0	-1.00365e-08	1.64385e-08	-2.28351e-09	0	0	0	7.19161e-09	0	5.32161e-09	-9.27368e-09	0	2.25387e-08	0	1.49054e-08	0	5.82798e-09
2391.12	16.845	0	1.81514e-09	1.86544e-09	-3.67319e-09	0	8.36885e-09	-7.31441e-09	0	1.29959e-08	0	5.40373e-25	4.37213e-09	-1.4197e-08	1.2035e-08	-2.85009e-08	0	-2.33852e-09
2407.96	16.848	0	3.1914e-09	3.60476e-24	0	7.39183e-09	1.02743e-08	0	1.49069e-09	3.35943e-24	0	3.42319e-09	0	1.31633e-08	1.65687e-08	2.02391e-08	-9.43009e-09	8.64497e-09
2424.81	16.848	3.54521e-09	1.47364e-09	3.04038e-09	1.12044e-08	0	1.51916e-09	0	2.78916e-09	2.85975e-09	2.06611e-08	0	4.22873e-09	5.83401e-09	1.2109e-08	0	1.63731e-09	-2.50265e-09
2441.66	16.845	5.94424e-09	8.45851e-09	0	4.67605e-09	0	0	1.28314e-08	8.47422e-09	3.60448e-09	0	2.16248e-08	5.95039e-09	0	5.31572e-09	0	1.31607e-08	-1.02504e-08
2458.5	16.849	0	2.29356e-08	1.27945e-08	8.28254e-09	1.34417e-08	1.17305e-08	8.85511e-09	2.0516e-08	3.01728e-09	1.60619e-08	0	2.43527e-08	6.94955e-09	1.76947e-08	5.11701e-08	3.37941e-09	2.60349e-08
2475.35	16.845	2.33844e-07	2.3062e-07	2.00257e-07	1.87226e-07	1.87916e-07	2.03974e-07	2.08016e-07	2.30429e-07	1.70136e-07	2.10235e-07	2.05189e-07	1.93253e-07	1.79392e-07	1.50595e-07	1.34022e-07	1.69104e-07	1.77913e-07
2492.2	16.846	3.1907e-06	3.03727e-06	3.06172e-06	3.0164e-06	3.01253e-06	3.00337e-06	3.01465e-06	3.0225e-06	3.03279e-06	3.04149e-06	3.05857e-06	3.03902e-06	3.09441e-06	3.12121e-06	3.46332e-06	4.13638e-06	5.05077e-06
2509.04	16.849	1.33785e-06	1.10564e-06	1.12391e-06	1.10667e-06	1.13737e-06	1.11887e-06	1.14e-06	1.05636e-06	1.12563e-06	1.10711e-06	1.05152e-06	1.08558e-06	1.01691e-06	9.97756e-07	9.60805e-07	1.09976e-06	1.19147e-06

## Sheet: k_GF5B
Wavelength	FWHM	k_Summer_L	k_Summer_M	k_Summer_H	k_Winter_L	k_Winter_M	k_Winter_H	k_1976_L	k_1976_M	k_1976_H
1009	8.546	0	0	0	0	0	0	0	0	0	0	0	0	0	0	0	0	0
1017.42	8.546	0	0	0	0	0	0	0	0	0	0	0	0	0	0	0	0	0
1025.83	8.546	0	0	0	0	0	0	0	0	0	0	0	0	0	0	0	0	0
1034.25	8.546	2.60117e-07	2.2496e-07	2.19185e-07	2.18219e-07	2.19914e-07	2.16225e-07	2.1506e-07	2.16622e-07	2.0887e-07	2.1008e-07	2.04665e-07	1.99243e-07	1.99761e-07	1.84703e-07	1.84308e-07	1.64608e-07	1.80018e-07
1042.67	8.546	2.55112e-07	2.0958e-07	2.16946e-07	2.20414e-07	2.22325e-07	2.13536e-07	2.0618e-07	2.18402e-07	2.03997e-07	2.10348e-07	1.96314e-07	2.10067e-07	1.94683e-07	1.88651e-07	1.90365e-07	1.46388e-07	1.73424e-07
1051.08	8.546	1.45467e-06	1.12311e-06	1.1309e-06	1.10928e-06	1.09788e-06	1.08045e-06	1.05159e-06	1.01491e-06	9.14498e-07	8.69365e-07	7.17107e-07	6.34686e-07	5.03102e-07	3.00985e-07	-4.89755e-08	-4.11331e-07	-6.56625e-07
1059.5	8.546	1.26694e-07	9.9987e-08	9.64555e-08	1.09796e-07	9.67659e-08	1.02869e-07	9.56085e-08	1.07962e-07	1.07717e-07	1.09069e-07	9.09794e-08	9.8014e-08	1.04658e-07	1.08861e-07	7.86427e-08	9.66514e-08	7.4357e-08
1067.92	8.546	2.2793e-07	1.85144e-07	1.84612e-07	1.7994e-07	1.77018e-07	1.78741e-07	1.81643e-07	1.79546e-07	1.73929e-07	1.71613e-07	1.66196e-07	1.8482e-07	1.65761e-07	1.64468e-07	1.40317e-07	1.42476e-07	1.39767e-07
1076.33	8.546	2.2307e-08	3.47563e-08	2.77823e-08	2.73429e-08	2.09096e-08	1.46679e-08	2.15844e-08	3.09221e-08	2.62743e-08	1.83203e-08	1.11845e-08	1.84001e-08	3.83425e-08	3.06229e-08	3.04344e-08	1.32445e-08	1.54834e-08
1084.75	8.546	0	-3.13023e-09	-1.36019e-09	0	0	-3.9876e-10	-1.81578e-09	-3.63706e-09	-1.86607e-09	1.84229e-09	0	-6.79482e-10	-1.3473e-09	0	0	0	-4.31215e-09
1093.17	8.546	0	-1.84606e-09	-5.92275e-10	-2.13402e-09	-9.74469e-10	-1.1347e-09	2.42638e-09	-8.74612e-10	7.31747e-09	1.02289e-25	9.1002e-10	1.8399e-09	5.10728e-10	-1.58056e-09	-5.18686e-10	-4.52853e-09	-7.31432e-09
1101.58	8.546	0	-2.91325e-25	2.29571e-09	0	2.28104e-10	2.36536e-09	0	0	0	0	-1.28805e-09	0	0	0	0	0	0
1110	8.546	0	1.26472e-10	6.80573e-10	0	0	2.24799e-09	0	6.76686e-10	4.97831e-10	0	3.1243e-09	2.74592e-10	0	0	4.26237e-09	1.1018e-24	6.21448e-09
1118.42	8.546	0	0	-9.63065e-10	3.74269e-09	0	0	-4.65395e-09	4.2576e-09	-1.23213e-09	0	0	3.60124e-10	-1.53837e-09	-8.60836e-10	-6.97108e-09	5.16109e-09	-3.51965e-09
1126.83	8.546	0	0	0	2.30713e-09	2.62718e-09	0	0	5.60366e-25	4.13094e-09	0	0	4.89128e-09	0	0	0	0	0
1135.25	8.546	0	3.94966e-09	-2.38481e-09	3.30268e-09	9.04113e-10	6.08753e-10	0	1.63764e-09	0	1.77789e-09	4.57855e-09	-1.40635e-09	-5.24178e-09	0	0	0	5.24241e-10
1143.67	8.546	0	0	0	0	0	0	0	0	0	0	0	0	0	0	0	0	0
1152.08	8.546	0	0	-1.62301e-24	-3.44089e-09	0	3.09876e-09	0	0	0	0	0	0	2.99285e-09	0	0	-8.88592e-09	-1.56315e-08
1160.5	8.546	0	0	0	0	0	0	0	0	0	0	0	0	0	0	0	0	0
1168.92	8.546	0	0	0	0	0	0	0	0	0	0	0	0	0	0	0	0	0
1177.33	8.546	0	0	0	2.18105e-09	0	0	0	0	0	0	0	0	0	0	0	0	0
1185.75	8.546	0	0	0	0	0	0	0	0	0	0	0	0	0	0	0	0	0
1194.17	8.546	-2.78911e-09	0	0	0	0	0	1.01706e-25	-2.73549e-09	0	0	0	1.68669e-09	0	-5.98636e-09	0	-1.22938e-08	8.30586e-09
1202.58	8.546	2.52804e-05	2.243e-05	2.23114e-05	2.22041e-05	2.21029e-05	2.20076e-05	2.1926e-05	2.17297e-05	2.15608e-05	2.13875e-05	2.10718e-05	2.08354e-05	2.03167e-05	1.9652e-05	1.89143e-05	1.75296e-05	1.71187e-05
1211	8.546	1.70311e-05	1.5054e-05	1.49613e-05	1.48818e-05	1.48142e-05	1.47214e-05	1.46435e-05	1.45143e-05	1.43555e-05	1.41963e-05	1.39582e-05	1.37542e-05	1.34154e-05	1.29568e-05	1.25423e-05	1.10122e-05	1.04896e-05
1219.42	8.546	2.67565e-05	2.34799e-05	2.33535e-05	2.32337e-05	2.31149e-05	2.29932e-05	2.28672e-05	2.26464e-05	2.24559e-05	2.22733e-05	2.19487e-05	2.17195e-05	2.11724e-05	2.04349e-05	1.97098e-05	1.78177e-05	1.75822e-05
1227.83	8.546	6.15116e-06	5.18771e-06	5.16823e-06	5.13036e-06	5.08792e-06	5.04427e-06	5.01831e-06	4.93395e-06	4.84444e-06	4.79886e-06	4.6802e-06	4.59257e-06	4.45005e-06	4.25238e-06	4.05925e-06	3.37627e-06	3.26973e-06
1236.25	8.546	1.13386e-06	9.7214e-07	9.64266e-07	9.6225e-07	9.55402e-07	9.53003e-07	9.40935e-07	9.17474e-07	9.07769e-07	9.0385e-07	8.93805e-07	8.91772e-07	8.60436e-07	7.99351e-07	7.5396e-07	6.94341e-07	6.95801e-07
1244.67	8.546	8.99337e-08	7.55701e-08	7.49927e-08	7.43594e-08	7.8015e-08	6.54261e-08	6.50778e-08	6.20805e-08	6.82041e-08	6.05663e-08	7.54265e-08	9.43574e-08	7.96356e-08	5.74261e-08	9.39543e-08	6.67749e-08	8.4209e-08
1253.08	8.546	2.1475e-07	2.01044e-07	1.88556e-07	1.78102e-07	1.85817e-07	1.98194e-07	1.93823e-07	2.05651e-07	1.99128e-07	1.92754e-07	2.08637e-07	1.71635e-07	1.71783e-07	1.50076e-07	1.74402e-07	1.77036e-07	2.48192e-07
1261.5	8.546	2.5543e-07	2.2684e-07	2.18758e-07	2.22369e-07	2.11236e-07	2.13902e-07	2.20151e-07	2.10615e-07	1.97112e-07	1.87507e-07	2.03853e-07	1.87496e-07	1.5454e-07	1.73051e-07	2.20331e-07	1.95602e-07	2.15664e-07
1269.92	8.546	6.58713e-08	6.19442e-08	7.51955e-08	7.51273e-08	5.00095e-08	6.55272e-08	5.21691e-08	4.93908e-08	6.25155e-08	8.00463e-08	5.08605e-08	6.08069e-08	4.57891e-08	5.44863e-08	5.29741e-08	8.22151e-08	7.57851e-08
1278.33	8.546	5.46579e-09	0	4.74607e-09	1.2138e-09	0	3.24261e-09	3.98242e-09	0	4.03608e-25	0	0	0	0	0	0	1.68865e-08	-3.83343e-09
1286.75	8.546	7.56431e-07	6.40397e-07	6.33294e-07	6.34359e-07	6.26151e-07	6.29518e-07	6.13421e-07	6.00478e-07	5.87464e-07	5.91565e-07	5.8259e-07	5.78739e-07	5.71173e-07	5.22104e-07	4.82286e-07	2.26114e-07	1.1953e-07
1295.17	8.546	1.72534e-06	1.29413e-06	1.28362e-06	1.27713e-06	1.26194e-06	1.24846e-06	1.28132e-06	1.26714e-06	1.31675e-06	1.30506e-06	1.31423e-06	1.32692e-06	1.19163e-06	1.03307e-06	4.20734e-07	-4.02701e-07	-1.04034e-06
1303.58	8.546	3.42303e-08	2.9758e-08	2.05199e-08	1.51001e-08	1.75753e-08	1.66399e-08	1.89881e-08	1.81811e-08	2.03448e-08	2.54453e-08	2.38602e-08	2.67905e-08	2.16347e-08	2.14421e-08	1.87111e-08	1.83678e-09	2.17791e-08
1312	8.546	4.03315e-06	3.55854e-06	3.52461e-06	3.50384e-06	3.50232e-06	3.52701e-06	3.4842e-06	3.4637e-06	3.42334e-06	3.40587e-06	3.36293e-06	3.33687e-06	3.23562e-06	3.0574e-06	2.96302e-06	3.1518e-06	3.32939e-06
1320.42	8.546	5.46922e-06	5.03646e-06	5.01758e-06	5.00698e-06	5.00971e-06	4.98105e-06	4.95747e-06	4.922e-06	4.93406e-06	4.86774e-06	4.86602e-06	4.77779e-06	4.64315e-06	4.53881e-06	4.62215e-06	4.90716e-06	5.38246e-06
1328.83	8.546	6.31751e-08	5.34808e-08	7.70677e-08	6.04734e-08	5.39993e-08	5.17689e-08	5.24982e-08	4.7276e-08	6.66256e-08	6.12553e-08	3.00667e-08	6.68343e-08	5.23238e-08	3.44849e-08	5.70882e-08	5.91674e-08	4.96687e-08
1337.25	8.546	2.70355e-06	2.72713e-06	2.7087e-06	2.72223e-06	2.70997e-06	2.71086e-06	2.71253e-06	2.66997e-06	2.67212e-06	2.58698e-06	2.55666e-06	2.62234e-06	2.57261e-06	2.59856e-06	2.70967e-06	2.81536e-06	2.79477e-06
1345.66	8.546	2.51011e-06	2.02843e-06	2.00874e-06	1.99846e-06	2.02735e-06	1.99789e-06	1.97668e-06	2.02054e-06	1.95056e-06	1.96086e-06	1.93853e-06	1.89624e-06	1.83344e-06	1.92864e-06	1.94657e-06	1.88982e-06	1.92485e-06
1354.08	8.546	1.7046e-07	1.57855e-07	1.20178e-07	2.01777e-07	1.81198e-07	1.19468e-07	1.29064e-07	2.04607e-07	1.54237e-07	1.39335e-07	1.19947e-07	9.03171e-08	1.08273e-07	1.58402e-07	1.43768e-07	1.43111e-07	1.35026e-07
1362.5	8.546	1.66181e-07	1.53331e-07	1.47035e-07	1.48466e-07	1.43791e-07	1.50807e-07	1.51714e-07	1.56312e-07	1.52621e-07	1.41209e-07	1.48182e-07	1.58321e-07	1.48612e-07	1.45709e-07	1.49134e-07	1.5275e-07	1.73388e-07
1370.91	8.546	7.98677e-07	8.87206e-07	8.24406e-07	8.42666e-07	8.84684e-07	8.65704e-07	8.36796e-07	8.64033e-07	9.101e-07	8.36209e-07	8.58155e-07	8.63354e-07	8.67894e-07	8.63669e-07	8.88997e-07	9.15831e-07	9.63827e-07
1379.33	8.546	2.09231e-07	2.06713e-07	2.63557e-07	2.53817e-07	2.38573e-07	3.07872e-07	2.64193e-07	2.75779e-07	3.00596e-07	2.45008e-07	2.38501e-07	2.99611e-07	2.74197e-07	2.00642e-07	2.41148e-07	2.4867e-07	2.83429e-07
1387.75	8.546	4.61075e-08	1.49019e-08	2.21616e-08	2.59354e-08	1.33777e-08	1.3069e-08	1.66656e-08	6.65153e-08	1.81454e-08	1.28385e-08	3.67657e-08	1.35201e-08	2.87948e-08	2.34051e-08	2.16524e-08	2.29532e-08	2.40669e-08
1396.16	8.546	-3.66148e-09	-3.26414e-09	-3.79461e-09	-7.35573e-09	1.57571e-09	2.75811e-09	3.52834e-10	4.61778e-09	1.01385e-08	-8.52857e-10	-1.50707e-09	-2.73965e-11	-3.49972e-09	-4.42835e-09	7.82885e-09	9.78507e-09	-9.19961e-09
1404.58	8.546	-1.70462e-09	-5.54419e-09	-4.36844e-10	-1.70013e-09	5.276e-09	1.89272e-09	1.90233e-09	1.92258e-09	1.94419e-09	-9.65737e-10	-4.40728e-09	5.05422e-10	-6.42845e-09	1.398e-08	-3.54099e-09	-4.22094e-09	-5.51169e-09
1413	8.546	0	1.08432e-09	-2.27044e-09	2.06448e-08	-1.11192e-09	-1.42817e-09	1.93577e-08	1.47575e-09	-1.184e-09	-5.53706e-10	1.28487e-09	1.74836e-08	4.3665e-09	-3.59353e-09	-3.54127e-10	-7.25792e-10	-6.53767e-09
1421.41	8.546	6.48918e-08	-1.64504e-09	1.13572e-09	7.44194e-09	9.26451e-09	2.22135e-08	1.74407e-08	1.59818e-09	-2.02824e-08	1.93336e-09	1.51321e-08	2.51461e-08	4.73297e-09	1.18352e-09	5.30761e-09	7.02563e-09	1.75252e-08
1429.83	8.546	0.00012003	0.000116588	0.000116383	0.00011616	0.000115946	0.000115779	0.000115561	0.000115053	0.000114547	0.00011401	0.000112866	0.00011158	0.000109991	0.000107455	0.000101935	9.52058e-05	8.7996e-05
1438.25	8.546	0.000273093	0.000222258	0.000221088	0.00021993	0.000218762	0.000217603	0.000216413	0.000214043	0.000211649	0.000209255	0.000204439	0.000199532	0.000194203	0.000186076	0.000171532	0.000156077	0.00014149
1446.66	8.546	6.27628e-05	5.03093e-05	5.00882e-05	4.98327e-05	4.95706e-05	4.93469e-05	4.90926e-05	4.86549e-05	4.81637e-05	4.76922e-05	4.68903e-05	4.60997e-05	4.51589e-05	4.36594e-05	4.1552e-05	3.94701e-05	3.81205e-05
1455.08	8.546	2.73404e-06	2.47323e-06	2.47191e-06	2.47326e-06	2.47878e-06	2.42629e-06	2.41834e-06	2.41679e-06	2.43026e-06	2.39315e-06	2.37513e-06	2.39951e-06	2.4321e-06	2.38439e-06	2.5202e-06	2.46057e-06	2.73194e-06
1463.5	8.546	1.64277e-07	8.76562e-08	9.50371e-08	1.18537e-07	6.64994e-08	9.04188e-08	1.31381e-07	1.06475e-07	7.99094e-08	9.89482e-08	1.14058e-07	5.41876e-08	3.98895e-08	1.49302e-07	5.1297e-08	4.23852e-08	7.68549e-08
1471.91	8.546	1.02864e-05	9.96095e-06	1.00127e-05	9.98766e-06	9.99018e-06	9.97969e-06	9.96643e-06	9.94132e-06	1.00242e-05	9.97214e-06	9.98517e-06	1.00429e-05	1.00309e-05	1.00541e-05	1.02373e-05	1.05123e-05	1.10168e-05
1480.33	8.546	7.85048e-06	7.55523e-06	7.57908e-06	7.57741e-06	7.53938e-06	7.56198e-06	7.55479e-06	7.50163e-06	7.56295e-06	7.55556e-06	7.51316e-06	7.54178e-06	7.57641e-06	7.66419e-06	8.03349e-06	8.21015e-06	8.55704e-06
1488.75	8.546	9.48155e-07	8.62645e-07	8.44062e-07	8.35576e-07	8.4663e-07	8.2184e-07	8.08623e-07	8.27819e-07	8.34417e-07	8.73102e-07	8.46818e-07	8.43068e-07	8.15013e-07	7.90873e-07	9.03773e-07	9.69974e-07	9.52101e-07
1497.16	8.546	3.61527e-06	3.07063e-06	3.0843e-06	3.07296e-06	3.02399e-06	2.97809e-06	2.936e-06	2.91036e-06	2.80883e-06	2.73538e-06	2.66308e-06	2.51383e-06	2.4151e-06	2.25883e-06	2.26245e-06	1.6044e-06	1.43921e-06
1505.58	8.546	1.03573e-07	1.27632e-07	1.17145e-07	1.04565e-07	1.5296e-07	9.66004e-08	1.04035e-07	1.17591e-07	9.35624e-08	9.92957e-08	9.64592e-08	1.08305e-07	1.80908e-07	1.84966e-07	1.41417e-07	1.30193e-07	1.68319e-07
1514	8.546	4.71826e-08	8.87876e-09	1.28369e-08	1.27602e-08	1.72838e-08	1.05409e-08	2.25942e-08	7.37632e-09	0	8.08628e-09	2.1717e-08	1.49114e-08	1.4347e-08	0	4.55121e-08	0	-7.64025e-10
1522.41	8.546	1.37563e-06	1.0758e-06	1.13407e-06	1.10097e-06	1.06437e-06	1.07871e-06	1.07361e-06	1.05668e-06	1.02067e-06	9.8776e-07	1.01518e-06	9.96906e-07	9.6253e-07	8.18328e-07	6.78148e-07	4.4879e-07	3.52562e-07
1530.83	8.546	2.11875e-05	1.85103e-05	1.8358e-05	1.8246e-05	1.81364e-05	1.79708e-05	1.78287e-05	1.76062e-05	1.73237e-05	1.70573e-05	1.68407e-05	1.66578e-05	1.59406e-05	1.54033e-05	1.47609e-05	1.13516e-05	1.16299e-05
1539.25	8.546	3.42212e-05	3.09752e-05	3.08363e-05	3.06434e-05	3.04856e-05	3.03506e-05	3.01811e-05	2.99102e-05	2.9655e-05	2.94644e-05	2.91193e-05	2.90014e-05	2.80786e-05	2.69703e-05	2.5944e-05	2.21058e-05	2.268e-05
1547.66	8.546	3.55012e-06	2.9377e-06	2.93959e-06	2.93016e-06	2.89455e-06	2.9054e-06	2.86263e-06	2.8596e-06	2.83101e-06	2.74889e-06	2.60847e-06	2.489e-06	2.3766e-06	2.17881e-06	2.38497e-06	1.84823e-06	1.28594e-06
1556.08	8.546	2.97024e-07	2.63977e-07	2.22491e-07	2.5865e-07	2.57092e-07	2.18267e-07	2.65097e-07	2.61235e-07	2.39903e-07	2.89013e-07	1.903e-07	2.46188e-07	2.15237e-07	2.75769e-07	1.67436e-07	1.67107e-07	1.7397e-07
1564.5	8.546	5.75435e-06	4.67369e-06	4.5727e-06	4.57909e-06	4.53895e-06	4.53552e-06	4.4376e-06	4.36801e-06	4.40208e-06	4.37052e-06	4.38116e-06	4.32017e-06	4.06708e-06	3.68791e-06	3.50438e-06	3.26678e-06	4.71066e-06
1572.91	8.546	0.000214617	0.000215372	0.00021415	0.000213017	0.000211911	0.000210684	0.000209705	0.00020737	0.000205412	0.000203517	0.000200159	0.000197219	0.000191814	0.000184206	0.000172294	0.000151552	0.000140631
1581.33	8.546	0.000128398	0.000129	0.000128268	0.000127563	0.000126835	0.000126223	0.000125569	0.000124249	0.000122998	0.000121816	0.000119591	0.00011772	0.000114577	0.000109887	0.000102819	8.95799e-05	8.3601e-05
1589.75	8.546	3.38797e-06	2.72011e-06	2.71768e-06	2.66979e-06	2.61868e-06	2.60824e-06	2.56533e-06	2.511e-06	2.52323e-06	2.49142e-06	2.44487e-06	2.37726e-06	2.17012e-06	2.01744e-06	2.04222e-06	1.55387e-06	1.4389e-06
1598.16	8.546	8.63951e-05	8.50874e-05	8.45619e-05	8.41323e-05	8.36904e-05	8.3267e-05	8.27757e-05	8.19925e-05	8.11995e-05	8.04752e-05	7.92531e-05	7.83598e-05	7.59695e-05	7.23293e-05	6.67426e-05	5.58428e-05	5.21072e-05
1606.58	8.546	0.000183006	0.000187957	0.000187131	0.000186083	0.000185248	0.000184311	0.000183413	0.000181793	0.000180162	0.000179035	0.000176033	0.000173777	0.000169245	0.000161547	0.000151617	0.000132051	0.000122151
1615	8.546	6.68097e-05	6.34459e-05	6.29167e-05	6.24585e-05	6.19962e-05	6.17227e-05	6.12113e-05	6.04579e-05	5.97217e-05	5.91518e-05	5.80156e-05	5.71578e-05	5.54119e-05	5.32023e-05	5.20401e-05	4.19285e-05	4.0749e-05
1623.41	8.546	5.43619e-06	4.12854e-06	4.05785e-06	4.00236e-06	3.93434e-06	3.87816e-06	3.62585e-06	3.53928e-06	3.22746e-06	3.2425e-06	2.98729e-06	2.74348e-06	2.35414e-06	1.93894e-06	1.24577e-06	1.45424e-06	9.17671e-07
1631.83	8.546	4.04153e-06	3.71667e-06	3.72497e-06	3.66775e-06	3.61439e-06	3.56715e-06	3.53775e-06	3.38676e-06	3.29617e-06	3.21966e-06	3.21306e-06	3.06746e-06	2.90776e-06	2.35086e-06	1.57355e-06	-1.93989e-07	-7.11906e-07
1640.25	8.546	2.97922e-05	2.66051e-05	2.63692e-05	2.61905e-05	2.60353e-05	2.5866e-05	2.57246e-05	2.54247e-05	2.52196e-05	2.4976e-05	2.46466e-05	2.45623e-05	2.3821e-05	2.29684e-05	2.20816e-05	1.77958e-05	1.88312e-05
1648.66	8.546	2.9377e-05	2.68818e-05	2.67204e-05	2.66386e-05	2.65093e-05	2.64105e-05	2.63225e-05	2.61655e-05	2.60378e-05	2.59427e-05	2.58439e-05	2.59516e-05	2.50673e-05	2.39174e-05	2.27653e-05	1.95276e-05	2.15577e-05
1657.08	8.546	5.62139e-06	4.7951e-06	4.65888e-06	4.64395e-06	4.60115e-06	4.51555e-06	4.64703e-06	4.55566e-06	4.49172e-06	4.41457e-06	4.3868e-06	4.40262e-06	4.21186e-06	3.76192e-06	4.25456e-06	3.95811e-06	4.92287e-06
1665.5	8.546	2.54832e-06	2.13531e-06	2.07756e-06	2.08342e-06	2.00321e-06	2.03815e-06	1.94771e-06	1.92927e-06	1.83591e-06	1.85935e-06	1.85195e-06	1.88945e-06	1.73787e-06	1.52558e-06	1.12523e-06	5.1245e-07	4.33248e-07
1673.91	8.546	6.698e-07	5.65782e-07	5.86233e-07	5.67974e-07	5.27595e-07	5.62492e-07	5.55359e-07	5.26904e-07	5.21532e-07	5.12337e-07	4.74434e-07	4.71499e-07	4.36066e-07	4.76469e-07	3.97276e-07	3.69065e-07	4.71303e-07
1682.33	8.546	1.61313e-07	1.40736e-07	1.64734e-07	1.51489e-07	8.60488e-08	1.72681e-07	1.79341e-07	1.98969e-07	1.53459e-07	1.8141e-07	1.82325e-07	1.85705e-07	1.72756e-07	6.44726e-08	1.26998e-07	1.33215e-07	1.03941e-07
1690.75	8.546	9.44624e-08	8.57142e-08	3.37714e-08	4.12979e-08	6.28824e-08	2.8158e-08	7.67329e-08	4.05645e-08	1.74928e-08	2.15407e-08	2.45228e-08	3.36379e-08	3.09993e-08	5.49619e-08	3.26397e-08	3.31857e-08	8.5807e-08
1699.16	8.546	1.2787e-08	1.37788e-08	0	6.41238e-09	1.40896e-08	0	1.84499e-24	2.60794e-24	8.35211e-09	1.11918e-08	0	1.05735e-08	3.32094e-08	2.17784e-08	7.20626e-09	2.22174e-09	1.64054e-08
1707.58	8.546	1.76438e-08	1.42082e-24	3.26036e-08	4.42897e-08	5.91342e-08	3.05303e-08	3.35773e-08	2.66097e-08	2.30351e-08	3.13832e-08	8.02302e-09	9.00324e-08	1.44087e-08	-1.29889e-08	2.15767e-08	2.70229e-08	3.22025e-08
1716	8.546	1.49152e-08	9.96558e-09	0	0	-2.05103e-09	1.16988e-09	0	0	4.26899e-08	8.97468e-09	1.19588e-08	1.78898e-08	1.31268e-08	3.23356e-08	1.70589e-09	-7.35805e-10	1.07266e-08
1724.41	8.546	7.28745e-09	0	0	6.30639e-08	2.0324e-08	0	4.39249e-09	0	-1.53292e-08	2.73207e-08	-6.26784e-09	1.78518e-08	8.37658e-09	0	1.17935e-09	1.48044e-08	2.05572e-08
1732.83	8.546	0	1.11909e-08	-7.41009e-09	0	0	-1.69918e-24	0	6.99237e-09	0	0	0	2.22686e-08	0	0	2.57975e-09	-3.79698e-24	-1.01573e-26
1741.25	8.546	0	0	0	1.40439e-08	0	0	0	1.49065e-08	1.00599e-08	0	0	2.00482e-08	0	-1.03732e-08	5.24367e-09	-1.05376e-09	1.44718e-08
1749.66	8.546	2.75229e-08	2.48515e-08	2.40549e-08	2.46862e-08	2.03485e-08	1.09351e-08	1.12278e-08	2.43156e-08	3.15233e-08	2.1455e-08	1.61498e-08	2.81162e-09	3.11523e-08	0	2.73975e-08	1.69821e-08	1.66318e-08
1758.08	8.546	2.68635e-07	3.03608e-07	1.56924e-07	2.32035e-07	2.30481e-07	3.00253e-07	2.51958e-07	2.39829e-07	2.5618e-07	1.79299e-07	1.44157e-07	2.32345e-07	9.20003e-08	1.17495e-07	2.07321e-07	1.71628e-07	2.22215e-07
1766.5	8.546	1.05829e-07	1.72869e-07	1.09296e-07	1.28888e-07	1.20105e-07	1.59728e-07	1.29729e-07	1.00242e-07	1.49964e-07	1.39904e-07	5.40512e-08	7.81245e-08	1.32549e-07	1.84142e-07	1.02253e-07	9.10691e-08	1.1783e-07
1774.91	8.546	1.61025e-08	2.77936e-08	3.9141e-08	1.86141e-08	1.61469e-08	0	2.93138e-08	9.9518e-09	8.07966e-09	3.33516e-08	-1.24699e-10	2.61922e-09	4.98839e-08	2.96723e-08	1.42769e-08	1.05218e-08	-2.21923e-08
1783.33	8.546	1.01036e-07	6.72454e-08	9.65453e-08	7.61314e-08	6.92189e-08	1.08924e-07	1.29119e-07	1.0769e-07	9.86007e-08	1.13028e-07	1.20898e-07	3.9033e-08	1.8052e-07	8.24952e-08	1.18073e-07	1.42807e-07	1.65098e-07
1791.75	8.546	2.55478e-07	6.24105e-08	1.27209e-07	9.53914e-08	1.26768e-07	1.55076e-07	1.53277e-07	1.70866e-07	9.97874e-08	1.1749e-07	9.26013e-08	2.01964e-07	1.64451e-07	7.99827e-08	1.5227e-07	1.93834e-07	1.91897e-07
1800.16	8.546	1.17803e-07	6.85162e-08	7.79288e-08	6.05433e-08	7.12279e-08	8.56458e-08	5.94908e-08	1.25868e-07	6.39317e-08	9.18428e-08	2.52674e-08	4.95033e-08	5.82638e-08	5.8889e-08	8.42626e-08	9.85461e-08	7.53593e-08
1808.58	8.546	7.52954e-08	2.84214e-10	4.11757e-08	5.90238e-09	9.93776e-09	7.84374e-08	5.05146e-08	9.27552e-08	9.36356e-11	1.16839e-08	9.40447e-10	3.61553e-08	2.4386e-10	1.91146e-08	1.80192e-08	2.13409e-08	1.87313e-08
1817	8.546	1.14562e-08	1.79251e-08	-3.14337e-08	-2.68412e-08	-2.72179e-08	-8.22571e-09	-2.08712e-08	-3.42884e-08	-3.85017e-08	-3.21964e-08	-2.82099e-08	-1.63519e-08	-4.48959e-08	-4.28838e-08	-3.34367e-08	-7.73045e-08	-8.49933e-08
1825.41	8.546	-1.76381e-09	1.49595e-08	1.60954e-08	2.82467e-08	1.63456e-08	2.23838e-08	2.98367e-08	9.41673e-09	1.62906e-08	2.70146e-08	2.91543e-08	3.04618e-08	2.8832e-08	3.7866e-08	3.79303e-08	8.97815e-09	4.30046e-08
1833.83	8.546	8.65142e-08	1.22706e-07	1.21196e-07	1.22935e-07	1.23063e-07	1.232e-07	1.23348e-07	1.07357e-07	1.0768e-07	1.24471e-07	1.10905e-07	1.30475e-07	1.3221e-07	1.35677e-07	1.11624e-07	1.22565e-07	1.10985e-07
1842.25	8.546	-2.50622e-09	-3.83821e-09	-3.84261e-09	-3.84729e-09	-3.8523e-09	-3.85762e-09	-3.86328e-09	-3.87571e-09	-3.88977e-09	-7.81124e-09	-7.88686e-09	-7.9819e-09	-4.05095e-09	-4.16913e-09	-4.4683e-09	-4.94349e-09	2.18461e-08
1850.66	8.546	-6.38231e-08	-9.16401e-08	-9.17281e-08	-9.18217e-08	-9.1922e-08	-9.50463e-08	-9.5164e-08	-9.41249e-08	-9.44145e-08	-9.47409e-08	-9.55232e-08	-9.65061e-08	-9.59496e-08	-9.83301e-08	-1.04251e-07	-1.13388e-07	-1.21874e-07
1859.08	8.546	7.97956e-09	2.10257e-08	2.75168e-08	2.75535e-08	2.75924e-08	1.62536e-08	3.39926e-08	1.86252e-08	1.51315e-08	4.77301e-08	1.74863e-08	1.60988e-08	7.1586e-08	3.41152e-08	3.80617e-08	2.03745e-08	2.24021e-08
1867.5	8.546	1.33167e-06	2.26658e-06	2.26194e-06	2.2355e-06	2.26904e-06	2.22974e-06	2.34174e-06	2.3356e-06	2.29565e-06	2.2791e-06	2.34994e-06	2.41333e-06	2.41887e-06	2.49663e-06	2.64026e-06	2.97397e-06	3.17405e-06
1875.91	8.546	2.44428e-05	2.40792e-05	2.40668e-05	2.41318e-05	2.41842e-05	2.41636e-05	2.4135e-05	2.41371e-05	2.41762e-05	2.41032e-05	2.41953e-05	2.41549e-05	2.42062e-05	2.42498e-05	2.456e-05	2.51068e-05	2.5591e-05
1884.33	8.546	4.39232e-05	3.62508e-05	3.61893e-05	3.6126e-05	3.61041e-05	3.59624e-05	3.60082e-05	3.58654e-05	3.57861e-05	3.56653e-05	3.5386e-05	3.5055e-05	3.47046e-05	3.41186e-05	3.29477e-05	3.15864e-05	3.05803e-05
1892.75	8.546	7.99035e-06	1.20343e-05	1.20756e-05	1.21116e-05	1.21413e-05	1.21351e-05	1.21877e-05	1.22308e-05	1.23214e-05	1.23768e-05	1.25149e-05	1.27594e-05	1.30041e-05	1.34366e-05	1.46274e-05	1.63932e-05	1.81479e-05
1901.16	8.546	3.70014e-06	4.16102e-06	4.15587e-06	4.19927e-06	4.15263e-06	4.19813e-06	4.08098e-06	4.19618e-06	4.15412e-06	4.16789e-06	4.1078e-06	4.22506e-06	4.21848e-06	4.2436e-06	4.5191e-06	4.77792e-06	5.07215e-06
1909.58	8.546	2.45201e-06	3.62059e-06	3.56091e-06	3.64987e-06	3.56699e-06	3.51028e-06	3.61822e-06	3.62809e-06	3.70717e-06	3.6364e-06	3.70741e-06	3.72976e-06	3.81575e-06	3.94024e-06	4.24035e-06	4.69982e-06	5.21803e-06
1918	8.546	5.7487e-07	6.22729e-07	6.76279e-07	6.99161e-07	6.37483e-07	7.91929e-07	7.38179e-07	7.12191e-07	7.04956e-07	7.01286e-07	7.42852e-07	6.86041e-07	6.32003e-07	7.21144e-07	7.4017e-07	8.77442e-07	9.47542e-07
1926.41	8.546	4.64509e-07	5.43194e-07	5.02647e-07	4.74576e-07	5.06805e-07	5.33568e-07	5.08791e-07	5.78725e-07	5.93338e-07	5.38627e-07	5.18261e-07	5.26366e-07	5.12468e-07	5.88125e-07	5.88259e-07	6.77282e-07	8.38315e-07
1934.83	8.546	6.35517e-06	5.30127e-06	5.20671e-06	5.27773e-06	5.21369e-06	5.22639e-06	5.19239e-06	5.24113e-06	5.18021e-06	5.1787e-06	5.17557e-06	5.19448e-06	5.17868e-06	5.2239e-06	5.39989e-06	5.8616e-06	6.29338e-06
1943.25	8.546	0.000281743	0.000207634	0.000206341	0.000204992	0.000203564	0.000202168	0.000200823	0.000198013	0.000195302	0.000192523	0.000186846	0.000181247	0.000175165	0.000165759	0.000149044	0.000131506	0.000115872
1951.66	8.546	0.00105516	0.000837486	0.000832618	0.000827724	0.000822767	0.000817761	0.000812707	0.000802559	0.000792253	0.000781771	0.00076036	0.00073826	0.000715618	0.000678887	0.000607693	0.000532535	0.000460444
1960.08	8.546	0.00111967	0.000920693	0.00091635	0.000911901	0.000907434	0.000902957	0.000898405	0.000889265	0.000879999	0.000870508	0.000851145	0.000830976	0.000809181	0.000773621	0.000703148	0.000624603	0.000549413
1968.5	8.546	0.000875481	0.000737602	0.000733499	0.000729552	0.000725637	0.000721535	0.00071758	0.00070953	0.000701598	0.00069353	0.000677448	0.000661027	0.00064418	0.000617697	0.000567873	0.000515139	0.000463145
1976.91	8.546	0.000224343	0.000212629	0.000211412	0.000210139	0.000208859	0.000207717	0.000206319	0.000203976	0.000201546	0.000199136	0.000194141	0.000189441	0.000183416	0.000173861	0.000155339	0.000132004	0.000110257
1985.33	8.546	3.7564e-05	3.25825e-05	3.23513e-05	3.22656e-05	3.22524e-05	3.2044e-05	3.21194e-05	3.15585e-05	3.16163e-05	3.16395e-05	3.14382e-05	3.14655e-05	3.09227e-05	2.9892e-05	2.91303e-05	2.55066e-05	2.76739e-05
1993.75	8.546	0.000183606	0.000169101	0.00016839	0.000167429	0.000166738	0.00016606	0.000165216	0.0001638	0.000162343	0.000161007	0.0001586	0.000156123	0.000152758	0.000147571	0.000137892	0.000125168	0.000117443
2002.16	8.546	0.00259712	0.00202463	0.00201335	0.00200201	0.00199048	0.00197893	0.00196724	0.0019435	0.00191928	0.00189463	0.00184353	0.00179006	0.00173565	0.00164683	0.00147134	0.00128552	0.00112065
2010.58	8.546	0.00273757	0.00217876	0.00216611	0.00215335	0.00214043	0.00212744	0.00211426	0.00208774	0.00206055	0.00203279	0.00197547	0.00191471	0.00185616	0.00175981	0.00156547	0.0013676	0.00117599
2019	8.546	0.00181724	0.00147475	0.00146646	0.00145813	0.00144963	0.00144121	0.00143265	0.00141541	0.00139808	0.00138028	0.00134383	0.00130592	0.00126884	0.00120821	0.00108717	0.000964034	0.000838415
2027.41	8.546	0.000533945	0.000477281	0.000474204	0.000471224	0.000468383	0.000465514	0.000462628	0.000456824	0.000451135	0.000445383	0.000433914	0.000422251	0.000410018	0.000391009	0.000353478	0.000309087	0.000267849
2035.83	8.546	0.000269312	0.000241385	0.000240115	0.000238606	0.00023716	0.000235661	0.000234395	0.000231717	0.000229394	0.000227294	0.000223612	0.000220787	0.000214492	0.000205642	0.000194991	0.000164502	0.000164219
2044.25	8.546	0.00036723	0.000351628	0.000349975	0.00034799	0.000346238	0.000344736	0.000343039	0.000339653	0.000335968	0.000332876	0.00032696	0.000322184	0.000314564	0.000302722	0.000281179	0.000245137	0.000225267
2052.66	8.546	0.00105223	0.000937244	0.00093232	0.000927344	0.000922184	0.000916908	0.000911787	0.000901071	0.000890324	0.000879133	0.000856035	0.000831575	0.000810449	0.000775889	0.000703842	0.000636441	0.000562466
2061.08	8.546	0.000722918	0.000662063	0.000658462	0.000655162	0.000651836	0.00064837	0.000644832	0.000637832	0.000630926	0.000623449	0.000608921	0.000593572	0.000578763	0.000554274	0.000504082	0.000450756	0.000395348
2069.49	8.546	0.000780126	0.000691056	0.000687002	0.000683074	0.000678873	0.00067505	0.000671032	0.000662912	0.000654777	0.000646459	0.000629255	0.000611584	0.000595532	0.000569508	0.000517013	0.000462127	0.000407002
2077.91	8.546	0.000422136	0.000393632	0.000391362	0.000389284	0.000386944	0.000384961	0.000382721	0.000378796	0.000374928	0.000370972	0.000363607	0.000356704	0.00034729	0.000332482	0.000306704	0.000266361	0.000240463
2086.33	8.546	0.000305763	0.000277738	0.000276094	0.000274306	0.000272563	0.000270898	0.000269248	0.000265877	0.000263028	0.000259959	0.000254936	0.000250755	0.00024256	0.000230563	0.000211707	0.000178978	0.000169105
2094.74	8.546	0.000124173	0.00010782	0.000106926	0.000106171	0.000105419	0.000104701	0.000103887	0.000102436	0.000101161	0.000100033	9.81844e-05	9.71777e-05	9.32629e-05	8.82277e-05	8.42146e-05	6.08712e-05	6.9641e-05
2103.16	8.546	4.37005e-05	3.97861e-05	3.96181e-05	3.95839e-05	3.93664e-05	3.91633e-05	3.90526e-05	3.87603e-05	3.90915e-05	3.8895e-05	3.95639e-05	3.93192e-05	3.78104e-05	3.60093e-05	3.29306e-05	2.1846e-05	3.51812e-05
2111.58	8.546	2.98005e-05	2.65856e-05	2.63288e-05	2.62249e-05	2.62024e-05	2.60318e-05	2.60305e-05	2.58403e-05	2.57453e-05	2.53176e-05	2.51089e-05	2.5266e-05	2.48764e-05	2.39488e-05	1.98934e-05	1.39644e-05	1.11436e-05
2119.99	8.546	9.49722e-06	7.74954e-06	7.60707e-06	7.25222e-06	7.08686e-06	6.82562e-06	6.4941e-06	6.39121e-06	5.99214e-06	5.79539e-06	5.24851e-06	4.86699e-06	4.47142e-06	4.25347e-06	4.66781e-06	4.68945e-07	1.70413e-06
2128.41	8.546	2.56354e-06	2.28209e-06	2.11952e-06	2.10143e-06	2.00592e-06	1.77535e-06	1.83371e-06	1.82977e-06	1.81911e-06	1.77852e-06	1.66186e-06	1.595e-06	1.41792e-06	1.13332e-06	8.0533e-07	-1.19749e-06	-9.85554e-07
2136.83	8.546	1.72524e-06	1.51793e-06	1.45048e-06	1.43533e-06	1.39773e-06	1.3601e-06	1.33799e-06	1.13867e-06	1.01637e-06	9.69554e-07	7.34683e-07	6.68454e-07	4.70476e-07	1.65898e-07	-4.2862e-07	-2.37837e-06	-2.86722e-06
2145.24	8.546	9.04563e-06	7.52604e-06	7.67461e-06	7.21718e-06	7.37339e-06	6.90428e-06	7.23342e-06	7.08379e-06	6.72471e-06	6.64436e-06	6.06529e-06	6.03004e-06	5.85233e-06	6.3832e-06	9.70543e-06	1.2778e-05	2.32881e-05
2153.66	8.546	1.28705e-05	1.16313e-05	1.12964e-05	1.11912e-05	1.13708e-05	1.11543e-05	1.06622e-05	1.05926e-05	1.03001e-05	1.02293e-05	9.83055e-06	9.5585e-06	9.33209e-06	9.16235e-06	9.91798e-06	7.19297e-06	9.22445e-06
2162.08	8.546	1.39358e-05	1.15398e-05	1.14325e-05	1.12518e-05	1.11193e-05	1.09374e-05	1.08177e-05	1.04014e-05	1.02618e-05	9.89486e-06	9.34768e-06	8.83446e-06	7.87731e-06	6.42024e-06	3.68196e-06	8.99948e-06	2.40793e-05
2170.49	8.546	6.45751e-06	5.67047e-06	5.61927e-06	5.76807e-06	5.37343e-06	5.33669e-06	5.45607e-06	5.0226e-06	5.03283e-06	4.76951e-06	4.29885e-06	4.25237e-06	3.69062e-06	2.35851e-06	2.86555e-07	-4.97599e-06	-8.7122e-06
2178.91	8.546	1.29303e-06	9.23428e-07	1.12935e-06	9.37758e-07	8.67431e-07	7.83055e-07	8.85776e-07	1.18339e-06	9.39905e-07	8.10474e-07	7.94023e-07	8.00595e-07	7.05012e-07	5.74855e-07	4.10742e-07	-4.00917e-07	-6.97412e-07
2187.33	8.546	9.42783e-07	8.82128e-07	7.20525e-07	8.80562e-07	7.70712e-07	8.60829e-07	7.63478e-07	7.4971e-07	7.33133e-07	7.67761e-07	7.4937e-07	7.72011e-07	7.52415e-07	7.31949e-07	7.41666e-07	4.97319e-07	8.05917e-07
2195.74	8.546	3.94427e-07	2.761e-07	4.87646e-07	4.51897e-07	4.24551e-07	2.78492e-07	3.40093e-07	2.48845e-07	4.66657e-07	3.22834e-07	3.50024e-07	3.40033e-07	3.53731e-07	2.89514e-07	3.5179e-07	4.02285e-07	3.98627e-07
2204.16	8.546	9.16319e-08	4.96833e-08	8.13994e-08	1.63605e-07	5.25982e-09	5.52669e-08	4.34908e-08	8.46415e-09	7.39564e-08	5.84782e-08	4.41522e-08	5.7902e-08	5.45027e-08	3.92181e-08	8.67428e-08	8.55702e-08	1.95938e-07
2212.58	8.546	3.51734e-07	2.41681e-07	2.90599e-07	3.90599e-07	2.90574e-07	2.82323e-07	2.65158e-07	3.0938e-07	2.80222e-07	2.86916e-07	3.00073e-07	3.05918e-07	2.84704e-07	2.65136e-07	2.83175e-07	1.10621e-07	2.07687e-07
2220.99	8.546	1.46195e-07	2.10198e-08	2.11753e-07	1.31232e-07	3.32049e-08	2.11257e-07	2.04111e-07	1.09906e-07	3.45431e-07	1.59243e-07	1.69546e-07	1.6072e-07	1.77275e-07	1.53959e-07	2.09396e-07	1.47458e-07	2.92386e-07
2229.41	8.546	3.15813e-08	1.88459e-07	1.86884e-07	7.84124e-08	2.72713e-07	1.33998e-07	4.56043e-08	1.29185e-07	9.95995e-08	1.06324e-07	9.84937e-08	7.09216e-08	9.59579e-08	1.07967e-07	6.60306e-08	1.61549e-08	5.46317e-08
2237.83	8.546	1.4265e-08	6.99173e-08	0	1.34875e-07	3.63372e-08	3.61078e-08	0	3.2302e-09	1.72856e-08	3.90278e-08	2.61876e-08	2.11498e-08	2.63319e-08	2.746e-08	-1.26748e-08	1.85238e-08	0
2246.24	8.546	4.42607e-08	3.0952e-08	1.52256e-07	6.44489e-09	4.04377e-08	9.75667e-08	2.34414e-08	2.57853e-08	6.66286e-08	6.94072e-08	6.82832e-08	7.04882e-08	8.80188e-08	7.53752e-08	5.06316e-08	9.28512e-08	4.46949e-23
2254.66	8.546	1.45302e-07	1.53849e-07	2.02262e-07	2.49824e-07	2.64794e-07	1.95947e-07	3.07921e-07	1.98052e-07	1.82414e-07	1.70702e-07	1.73435e-07	1.70031e-07	1.43216e-07	1.67616e-07	1.25489e-07	3.11261e-07	1.41653e-07
2263.08	8.546	1.20531e-07	8.85155e-08	1.80602e-08	8.49299e-08	1.29308e-08	7.60202e-08	1.48972e-07	5.77363e-08	5.94504e-08	6.68092e-08	6.92649e-08	6.05167e-08	7.65377e-08	1.07882e-07	6.35565e-08	1.04316e-07	2.9991e-08
2271.49	8.546	3.81233e-08	2.94268e-24	6.26206e-08	1.20286e-08	4.6559e-09	9.41178e-09	1.67839e-08	4.56771e-08	4.0239e-08	4.19069e-08	1.50836e-08	1.71721e-08	7.70697e-08	2.09757e-08	7.19392e-09	6.47434e-08	2.08924e-08
2279.91	8.546	1.15795e-23	-4.19754e-25	1.45597e-08	1.08501e-07	2.77958e-08	3.41013e-08	2.26067e-08	5.9753e-08	4.97973e-08	2.34416e-08	7.05859e-08	3.72401e-08	5.16639e-08	4.46423e-08	1.79144e-08	1.04363e-07	1.96257e-08
2288.33	8.546	0	1.8649e-24	1.2045e-08	9.22155e-09	2.79013e-24	5.93343e-09	0	3.89841e-09	6.06129e-25	9.13174e-09	2.70055e-08	1.31381e-08	1.75018e-08	2.62483e-08	-3.37081e-09	4.52963e-08	-2.87682e-08
2296.74	8.546	0	5.6441e-09	1.27901e-08	2.71669e-09	1.28044e-08	0	0	8.49986e-09	0	1.02407e-08	8.72549e-09	0	-3.94206e-09	3.04005e-08	9.98818e-08	3.50393e-24	2.40381e-08
2305.16	8.546	0	0	0	2.42498e-08	0	1.167e-08	6.71963e-09	-1.79245e-09	1.27026e-08	0	0	0	1.21745e-08	3.9311e-09	2.2061e-08	7.70631e-09	-2.15564e-08
2313.58	8.546	0	0	2.01695e-24	4.59266e-08	0	0	2.99819e-08	9.34628e-09	3.5757e-09	2.2171e-09	1.52865e-08	0	0	-1.74848e-08	0	-2.4256e-08	-3.53523e-09
2321.99	8.546	0	0	-6.19109e-09	0	2.35666e-08	2.38496e-09	5.2585e-09	0	0	5.05736e-09	0	2.04591e-08	0	0	0	0	4.22931e-09
2330.41	8.546	0	0	0	0	0	-7.16481e-09	4.30146e-24	4.83721e-09	0	0	0	-6.50978e-09	0	0	0	0	2.27228e-09
2338.83	8.546	0	0	0	-3.67566e-09	0	6.8141e-09	4.33136e-24	0	-5.67579e-09	-3.02037e-09	1.06363e-08	0	0	-1.03717e-08	0	0	1.60542e-08
2347.24	8.546	0	0	1.06403e-08	-8.92227e-09	1.72466e-09	1.66758e-08	9.14829e-25	0	0	6.63508e-09	0	0	0	-2.5337e-08	0	0	1.18309e-08
2355.66	8.546	0	0	0	0	1.17252e-08	4.79334e-09	0	0	1.85363e-09	0	0	0	0	2.82288e-08	0	6.71071e-08	8.65194e-09
2364.08	8.546	0	0	0	0	0	0	0	2.81808e-09	3.47145e-24	0	0	0	-8.36833e-09	0	0	0	-1.54249e-08
2372.49	8.546	0	-1.4477e-08	2.16302e-08	3.60388e-09	0	0	0	0	0	-1.45088e-24	-1.76658e-08	0	3.42093e-08	0	4.29527e-24	0	2.0605e-08
2380.91	8.546	0	-1.89124e-24	5.38556e-09	-7.78683e-09	0	5.37435e-09	0	1.73169e-08	0	1.41757e-08	0	8.56037e-09	6.72013e-24	0	4.30418e-08	0	-6.2715e-09
2389.33	8.546	0	0	0	-4.68348e-09	0	1.12407e-08	-8.57312e-09	0	1.74563e-08	0	2.20773e-24	0	-1.95876e-08	0	-4.09676e-08	0	-1.50576e-08
2397.74	8.546	0	5.49295e-09	5.64748e-09	0	0	6.17314e-09	-5.44459e-09	0	8.91148e-09	0	0	0	0	2.16593e-08	0	0	2.38993e-08
2406.16	8.546	0	5.93848e-09	8.50688e-24	0	1.12717e-08	0	0	0	1.59788e-24	0	0	0	0	0	0	0	1.54659e-08
2414.58	8.546	0	0	0	3.40974e-09	3.52892e-09	2.24728e-08	0	3.94189e-09	4.90223e-24	0	4.96249e-09	0	3.06169e-08	3.84422e-08	6.73582e-08	-1.888e-08	-1.42641e-08
2422.99	8.546	6.87483e-09	3.06799e-09	0	1.20182e-08	0	-1.15524e-24	0	0	0	3.56047e-08	0	8.4637e-09	0	1.55325e-08	0	2.38804e-09	2.72699e-10
2431.41	8.546	4.17046e-09	0	9.30634e-09	9.75711e-09	0	2.76882e-09	0	7.37806e-09	3.69433e-09	0	0	0	9.10939e-09	0	0	0	2.44368e-09
2439.83	8.546	0	6.34784e-09	0	6.77261e-09	0	0	1.62135e-08	8.03418e-09	0	0	2.98256e-08	1.0822e-08	0	0	0	1.95692e-08	-1.1449e-08
2448.24	8.546	1.131e-08	2.10473e-08	0	2.58414e-09	0	0	9.68104e-09	1.17206e-08	1.5987e-08	0	1.9681e-08	0	0	1.60723e-08	0	0	-9.49939e-09
2456.66	8.546	0	2.48408e-08	1.52815e-08	1.23176e-08	1.14228e-08	1.73669e-08	2.8925e-09	2.33776e-08	0	1.33471e-08	0	1.79301e-08	0	0	5.61665e-08	0	1.9838e-08
2465.08	8.546	0	3.75048e-08	6.74217e-09	4.09098e-24	1.90892e-08	3.11884e-08	2.98404e-08	5.57146e-08	9.41509e-09	3.94238e-08	3.99461e-08	4.99201e-08	1.84409e-08	5.37009e-08	2.72981e-08	1.71166e-08	6.8538e-08
2473.49	8.546	5.5753e-09	8.61175e-08	4.70196e-08	4.3293e-08	6.1371e-08	6.14229e-08	6.77971e-08	9.20691e-08	3.76666e-08	5.84685e-08	5.28297e-08	6.37576e-08	8.06856e-08	3.51363e-09	6.4352e-09	5.1766e-08	2.9097e-08
2481.91	8.546	2.14073e-06	2.06397e-06	2.05423e-06	2.04028e-06	2.02707e-06	2.0356e-06	2.05568e-06	2.05219e-06	2.04494e-06	2.12625e-06	2.10398e-06	2.10484e-06	2.13228e-06	2.20705e-06	2.49849e-06	3.23577e-06	4.21752e-06
2490.33	8.546	3.70858e-06	3.35014e-06	3.3749e-06	3.32769e-06	3.29213e-06	3.30392e-06	3.33918e-06	3.31747e-06	3.31535e-06	3.28603e-06	3.26223e-06	3.27099e-06	3.34666e-06	3.34466e-06	3.63666e-06	4.28332e-06	5.14221e-06
2498.74	8.546	1.83221e-06	1.721e-06	1.71816e-06	1.67917e-06	1.73943e-06	1.66437e-06	1.69057e-06	1.65322e-06	1.69123e-06	1.69081e-06	1.6787e-06	1.61655e-06	1.60374e-06	1.6204e-06	1.67555e-06	1.71577e-06	1.81039e-06
2507.16	8.546	1.02126e-06	8.39151e-07	8.95367e-07	8.76631e-07	8.71076e-07	9.17121e-07	8.79089e-07	8.45229e-07	8.75899e-07	8.58511e-07	8.08086e-07	8.07956e-07	7.50893e-07	7.96809e-07	7.3011e-07	9.63578e-07	1.07633e-06
2515.58	8.546	1.97527e-06	1.33948e-06	1.36487e-06	1.38831e-06	1.35309e-06	1.34112e-06	1.37006e-06	1.30595e-06	1.33062e-06	1.29416e-06	1.37158e-06	1.30272e-06	1.24917e-06	1.2549e-06	1.21483e-06	1.17664e-06	1.24787e-06

## Sheet: k_GF5A
Wavelength	FWHM	k_Summer_L	k_Summer_M	k_Summer_H	k_Winter_L	k_Winter_M	k_Winter_H	k_1976_L	k_1976_M	k_1976_H
1014.15	8.25	0	0	0	0	0	0	0	0	0	0	0	0	0	0	0	0	0
1022.56	8.25	0	0	0	0	0	0	0	0	0	0	0	0	0	0	0	0	0
1030.98	8.25	0	0	0	0	0	0	0	0	0	0	0	0	0	0	0	0	0
1039.4	8.25	6.14312e-07	5.18149e-07	5.20194e-07	5.22963e-07	5.22379e-07	5.06908e-07	5.09807e-07	5.16324e-07	4.90641e-07	4.97364e-07	4.81381e-07	4.85057e-07	4.75161e-07	4.42461e-07	4.40507e-07	3.79832e-07	4.18123e-07
1047.81	8.25	8.49952e-07	6.27024e-07	6.32325e-07	6.13074e-07	6.16888e-07	6.17753e-07	5.98734e-07	5.89254e-07	5.47742e-07	5.25363e-07	4.5807e-07	4.18122e-07	3.25549e-07	1.72104e-07	-7.29797e-08	-3.04748e-07	-4.20807e-07
1056.23	8.25	4.818e-07	4.02424e-07	3.98742e-07	4.00531e-07	3.84738e-07	3.88064e-07	3.69654e-07	3.63731e-07	3.35871e-07	3.2e-07	2.76614e-07	2.54098e-07	2.38206e-07	2.33147e-07	1.6533e-07	9.65375e-08	2.92655e-08
1064.65	8.25	3.1935e-07	2.57817e-07	2.54613e-07	2.54134e-07	2.51076e-07	2.56034e-07	2.51204e-07	2.60106e-07	2.48351e-07	2.53392e-07	2.34355e-07	2.6366e-07	2.46212e-07	2.28271e-07	2.12267e-07	2.06623e-07	2.00728e-07
1073.06	8.25	3.76405e-08	4.53186e-08	4.51315e-08	4.6441e-08	3.98424e-08	2.56076e-08	3.62049e-08	4.14629e-08	3.3247e-08	3.3085e-08	2.5247e-08	2.40754e-08	4.58346e-08	3.28747e-08	3.27415e-08	1.54697e-08	1.20625e-08
1081.48	8.25	0	3.21989e-10	2.46664e-11	-1.13923e-09	1.58687e-09	1.7914e-09	-1.50826e-09	1.16233e-09	5.86782e-09	1.94313e-09	8.96445e-25	1.46538e-09	4.2133e-09	3.46165e-09	6.02693e-09	-3.13767e-09	1.54447e-09
1089.9	8.25	0	2.1465e-09	-8.71594e-10	-9.74487e-10	-7.06434e-10	-2.5372e-10	7.87752e-10	0	8.11837e-09	2.94994e-25	1.28041e-09	1.41917e-09	3.50678e-09	0	1.34647e-09	0	0
1098.31	8.25	0	-3.5665e-09	1.26234e-09	-7.05813e-10	3.48129e-10	1.23032e-09	2.22777e-09	-1.37343e-09	0	6.77545e-25	-1.09711e-09	0	-5.4236e-09	-2.39014e-10	-1.64792e-09	-4.57731e-09	-5.78268e-09
1106.73	8.25	0	0	0	0	0	0	0	0	0	0	0	0	0	0	0	0	0
1115.15	8.25	0	5.04848e-10	1.85044e-09	1.98502e-09	0	4.62248e-09	0	8.21639e-09	-1.25297e-09	0	5.38298e-09	6.30705e-10	-8.97166e-10	-5.40199e-10	9.27257e-10	7.93136e-09	-1.34819e-09
1123.56	8.25	0	0	0	0	0	0	-4.74398e-09	0	0	0	0	0	0	0	0	0	0
1131.98	8.25	0	6.18106e-09	-4.30577e-09	8.51577e-09	4.13885e-09	4.15165e-10	0	1.94804e-09	4.56573e-09	4.7671e-09	4.65086e-09	2.92935e-09	-9.01813e-09	0	0	0	4.21781e-10
1140.4	8.25	0	0	0	0	0	0	0	0	0	-1.55241e-09	-1.44099e-09	0	0	0	0	0	0
1148.81	8.25	0	0	-1.24026e-24	0	0	3.05468e-09	0	0	0	0	0	0	2.88928e-09	0	0	-9.27179e-09	-1.61763e-08
1157.23	8.25	0	0	0	-1.91582e-09	0	0	0	0	0	0	0	0	0	0	0	0	0
1165.65	8.25	0	0	0	0	0	0	0	0	0	0	0	0	0	0	0	0	0
1174.06	8.25	0	0	0	4.02005e-09	0	0	0	0	0	0	0	0	0	0	0	0	0
1182.48	8.25	0	0	0	0	0	0	0	0	0	0	0	0	0	0	0	0	0
1190.9	8.25	-2.1719e-09	0	0	0	0	0	0	0	0	0	0	0	0	-3.26836e-09	0	0	0
1199.31	8.25	6.03466e-07	5.26678e-07	5.15184e-07	5.12722e-07	5.00825e-07	5.01666e-07	5.06354e-07	4.94442e-07	4.89382e-07	4.80965e-07	4.68577e-07	4.7097e-07	4.49513e-07	4.31419e-07	4.11566e-07	3.61537e-07	3.42011e-07
1207.73	8.25	3.73351e-05	3.33908e-05	3.31994e-05	3.30426e-05	3.29112e-05	3.2748e-05	3.26063e-05	3.23286e-05	3.20784e-05	3.1785e-05	3.13144e-05	3.09249e-05	3.01486e-05	2.90805e-05	2.79657e-05	2.55327e-05	2.4722e-05
1216.15	8.25	1.45737e-05	1.2567e-05	1.24938e-05	1.24181e-05	1.23403e-05	1.22609e-05	1.21771e-05	1.20222e-05	1.18891e-05	1.17624e-05	1.1563e-05	1.13881e-05	1.10802e-05	1.06568e-05	1.02498e-05	8.9748e-06	8.67921e-06
1224.56	8.25	1.60429e-05	1.39924e-05	1.39249e-05	1.38409e-05	1.3779e-05	1.36939e-05	1.36313e-05	1.34875e-05	1.33525e-05	1.32353e-05	1.30192e-05	1.28998e-05	1.2502e-05	1.19775e-05	1.13357e-05	1.00769e-05	9.9989e-06
1232.98	8.25	1.63173e-06	1.37486e-06	1.3631e-06	1.36501e-06	1.34948e-06	1.33372e-06	1.32945e-06	1.30655e-06	1.27988e-06	1.28498e-06	1.25641e-06	1.24957e-06	1.20791e-06	1.12467e-06	1.07128e-06	9.43471e-07	9.80183e-07
1241.4	8.25	3.63813e-07	3.10658e-07	3.16058e-07	3.11312e-07	3.09588e-07	3.0998e-07	3.02199e-07	2.9176e-07	2.9239e-07	2.80574e-07	2.88266e-07	3.14426e-07	3.01364e-07	2.65178e-07	2.88084e-07	2.66783e-07	2.70093e-07
1249.81	8.25	1.4964e-07	1.36871e-07	1.28897e-07	1.2079e-07	1.21459e-07	1.34102e-07	1.33079e-07	1.22521e-07	1.18917e-07	1.2197e-07	1.41138e-07	1.02283e-07	1.08725e-07	8.60773e-08	1.31317e-07	9.11984e-08	1.57807e-07
1258.23	8.25	2.03502e-07	1.7891e-07	1.5576e-07	1.7243e-07	1.58423e-07	1.66124e-07	1.65191e-07	1.8524e-07	1.71122e-07	1.49957e-07	1.64763e-07	1.5059e-07	1.36863e-07	1.3791e-07	1.39222e-07	1.86805e-07	1.63564e-07
1266.65	8.25	2.16302e-07	1.86136e-07	2.16906e-07	2.06906e-07	1.86863e-07	1.92475e-07	1.82442e-07	1.73924e-07	1.67336e-07	1.9795e-07	1.76634e-07	1.67704e-07	1.44298e-07	1.57844e-07	1.83939e-07	1.7859e-07	2.30256e-07
1275.06	8.25	7.99513e-09	0	6.34022e-09	2.1331e-09	0	1.85695e-09	3.2179e-09	0	0	0	0	3.6502e-09	2.29169e-24	1.02501e-08	4.62324e-09	1.21346e-08	0
1283.48	8.25	7.23022e-08	5.63274e-08	4.84276e-08	5.74458e-08	5.75928e-08	3.74232e-08	4.04807e-08	4.24057e-08	3.14228e-08	5.3109e-08	5.83199e-08	5.15412e-08	2.506e-08	2.03903e-08	3.6101e-08	3.66155e-08	4.95277e-08
1291.9	8.25	2.29049e-06	1.85916e-06	1.8506e-06	1.84898e-06	1.8258e-06	1.83317e-06	1.83446e-06	1.81412e-06	1.83362e-06	1.81104e-06	1.83558e-06	1.89412e-06	1.86611e-06	1.78106e-06	1.35337e-06	2.72111e-07	-7.57948e-07
1300.31	8.25	3.02053e-07	2.67773e-07	2.64021e-07	2.45522e-07	2.51546e-07	2.50764e-07	2.4689e-07	2.49139e-07	2.63545e-07	2.56699e-07	2.39955e-07	2.47756e-07	2.34933e-07	2.10934e-07	2.18517e-07	1.62169e-07	1.68711e-07
1308.73	8.25	1.46785e-07	1.46229e-07	1.19265e-07	1.26315e-07	1.17269e-07	1.47244e-07	1.36448e-07	1.30914e-07	1.26351e-07	1.21913e-07	1.31834e-07	1.42483e-07	1.21133e-07	1.15455e-07	1.08848e-07	1.20105e-07	1.12157e-07
1317.15	8.25	8.7429e-06	7.89777e-06	7.86412e-06	7.8212e-06	7.81301e-06	7.79146e-06	7.74121e-06	7.68305e-06	7.6327e-06	7.55822e-06	7.53214e-06	7.40155e-06	7.19994e-06	6.92097e-06	6.7266e-06	7.04936e-06	8.03955e-06
1325.56	8.25	7.01211e-07	5.18911e-07	5.28375e-07	5.25507e-07	5.15301e-07	4.98999e-07	4.94468e-07	4.82091e-07	5.03184e-07	4.83507e-07	4.30217e-07	4.16284e-07	3.52435e-07	2.85194e-07	3.37687e-07	2.95932e-07	-3.01853e-08
1333.98	8.25	1.06781e-06	1.04445e-06	1.06122e-06	1.0371e-06	1.02701e-06	1.04112e-06	1.02873e-06	1.01565e-06	1.0267e-06	9.46016e-07	9.34914e-07	9.73605e-07	9.32702e-07	9.2031e-07	9.2435e-07	9.9695e-07	9.80761e-07
1342.4	8.25	3.1752e-06	2.87919e-06	2.86912e-06	2.87198e-06	2.89325e-06	2.86251e-06	2.85595e-06	2.8605e-06	2.82606e-06	2.8091e-06	2.75392e-06	2.74096e-06	2.70654e-06	2.74027e-06	2.73523e-06	2.72312e-06	2.73927e-06
1350.81	8.25	3.41179e-07	2.25616e-07	2.33713e-07	3.37883e-07	2.74904e-07	2.31258e-07	2.25416e-07	3.56801e-07	2.26895e-07	2.51969e-07	2.24051e-07	1.95721e-07	1.83425e-07	3.22838e-07	3.32321e-07	2.95885e-07	2.83203e-07
1359.23	8.25	1.06211e-07	9.28794e-08	9.39714e-08	9.03038e-08	1.10218e-07	9.59751e-08	9.40632e-08	1.05356e-07	9.61931e-08	8.64939e-08	9.7409e-08	9.36612e-08	9.07838e-08	8.53562e-08	9.95286e-08	1.03299e-07	1.11782e-07
1367.65	8.25	6.3265e-07	6.27861e-07	6.07461e-07	6.21231e-07	6.17805e-07	6.17998e-07	6.23314e-07	6.28319e-07	6.33181e-07	6.15915e-07	6.24194e-07	6.37123e-07	6.30848e-07	6.36618e-07	6.20267e-07	6.53243e-07	6.84305e-07
1376.06	8.25	3.47465e-07	3.88616e-07	4.12085e-07	4.33462e-07	4.54668e-07	5.01292e-07	4.22055e-07	4.48692e-07	5.2315e-07	4.23144e-07	4.11608e-07	4.77912e-07	4.88077e-07	3.62256e-07	4.40722e-07	4.59169e-07	5.20208e-07
1384.48	8.25	9.49809e-08	4.21716e-08	4.6211e-08	6.14571e-08	3.68747e-08	3.28115e-08	4.40082e-08	5.34885e-08	5.1648e-08	3.50212e-08	4.99086e-08	3.00439e-08	5.35088e-08	5.61541e-08	4.67637e-08	5.24643e-08	5.04455e-08
1392.9	8.25	-1.71207e-09	-8.04472e-09	5.97206e-09	-9.75317e-09	-4.74621e-09	4.71542e-09	-1.7796e-09	4.23612e-08	3.34383e-09	-4.97766e-09	2.47882e-08	1.70366e-09	-2.30128e-09	-1.09221e-08	8.36628e-10	-1.6514e-09	-1.02154e-08
1401.31	8.25	-1.80188e-09	2.05814e-09	1.67403e-09	2.07484e-09	9.94372e-09	2.92396e-09	3.50563e-09	4.78322e-09	6.06728e-09	2.73392e-09	-4.95559e-09	2.25399e-09	-7.37102e-10	4.46441e-09	1.17904e-10	3.67698e-09	-1.31552e-08
1409.73	8.25	0	1.1824e-09	-1.21231e-09	1.92792e-08	3.08638e-09	0	1.71401e-09	4.08107e-09	-6.55314e-10	-3.96703e-09	1.52196e-09	-4.99493e-09	4.08681e-09	2.33583e-08	9.58993e-10	-1.20096e-09	0
1418.15	8.25	7.12453e-08	-8.00883e-10	2.82067e-10	-5.20796e-10	-2.59359e-09	-7.07822e-10	2.87972e-08	-1.16928e-09	-1.76851e-08	0	9.82071e-09	3.24681e-08	5.38828e-09	-3.90473e-09	1.29846e-09	1.16327e-08	1.22172e-10
1426.56	8.25	2.1099e-06	1.16973e-06	1.15876e-06	1.13122e-06	1.15527e-06	1.15476e-06	1.15445e-06	1.05312e-06	1.03838e-06	1.04661e-06	9.6105e-07	9.64126e-07	8.0746e-07	8.14305e-07	7.25094e-07	6.48961e-07	5.59517e-07
1434.98	8.25	0.00033189	0.00028232	0.000281031	0.000279779	0.000278487	0.000277214	0.000275917	0.000273343	0.000270634	0.00026795	0.00026253	0.000256889	0.000250794	0.000241223	0.000223427	0.000204107	0.000185242
1443.4	8.25	0.000137351	0.00010942	0.000108902	0.000108318	0.000107754	0.000107285	0.000106682	0.000105661	0.000104585	0.000103522	0.00010154	9.95032e-05	9.72111e-05	9.36958e-05	8.79513e-05	8.17074e-05	7.62988e-05
1451.81	8.25	1.17124e-05	9.99039e-06	9.96324e-06	9.93148e-06	9.88969e-06	9.82326e-06	9.80992e-06	9.76856e-06	9.74509e-06	9.64282e-06	9.5912e-06	9.59093e-06	9.53327e-06	9.3903e-06	9.4731e-06	9.62047e-06	1.0017e-05
1460.23	8.25	4.85529e-07	3.48644e-07	3.50018e-07	3.69695e-07	3.43805e-07	3.38819e-07	3.60152e-07	3.52723e-07	3.21603e-07	3.4916e-07	3.25393e-07	2.96393e-07	2.86742e-07	3.5792e-07	3.18428e-07	1.69443e-07	3.05943e-07
1468.65	8.25	4.02675e-06	3.74776e-06	3.76592e-06	3.75872e-06	3.72698e-06	3.7395e-06	3.74308e-06	3.74847e-06	3.7621e-06	3.72529e-06	3.73079e-06	3.73598e-06	3.72891e-06	3.67667e-06	3.7128e-06	3.69372e-06	3.74038e-06
1477.06	8.25	1.00368e-05	9.91306e-06	9.95174e-06	9.92417e-06	9.92204e-06	9.9355e-06	9.91041e-06	9.85563e-06	9.9409e-06	9.93027e-06	9.90737e-06	9.97258e-06	1.00657e-05	1.01972e-05	1.06144e-05	1.11113e-05	1.16808e-05
1485.48	8.25	1.91542e-06	1.76865e-06	1.7392e-06	1.77671e-06	1.74725e-06	1.74142e-06	1.73206e-06	1.75222e-06	1.78047e-06	1.7664e-06	1.75773e-06	1.75904e-06	1.76687e-06	1.69203e-06	1.85153e-06	1.86093e-06	1.96159e-06
1493.9	8.25	3.16477e-06	2.59143e-06	2.58031e-06	2.55338e-06	2.52352e-06	2.46468e-06	2.4401e-06	2.40683e-06	2.26828e-06	2.24329e-06	2.11166e-06	1.99061e-06	1.83951e-06	1.66855e-06	1.56628e-06	9.76087e-07	6.6255e-07
1502.31	8.25	6.00473e-07	5.68311e-07	5.7342e-07	5.63827e-07	5.91872e-07	5.43331e-07	5.46758e-07	5.40028e-07	5.32359e-07	5.29956e-07	5.66579e-07	5.37459e-07	5.86479e-07	6.03655e-07	5.82189e-07	5.74783e-07	6.1774e-07
1510.73	8.25	4.96517e-08	1.94553e-08	-9.51377e-25	3.02387e-09	1.39782e-08	0	2.14403e-08	1.41335e-08	1.13998e-08	9.21166e-09	1.18833e-08	1.69348e-08	1.33438e-08	5.23018e-09	3.9955e-08	0	3.57036e-09
1519.15	8.25	1.06205e-07	2.69532e-08	1.19372e-07	8.34244e-08	5.09686e-08	8.15289e-08	6.41921e-08	8.16925e-08	7.13064e-08	3.88623e-08	8.75556e-08	4.53374e-08	6.70632e-08	1.87164e-08	1.06703e-07	3.83605e-08	6.77818e-08
1527.56	8.25	6.41215e-06	5.39525e-06	5.2915e-06	5.27516e-06	5.23319e-06	5.12701e-06	5.02576e-06	4.93051e-06	4.67721e-06	4.49224e-06	4.386e-06	4.28425e-06	3.95846e-06	4.03414e-06	3.71518e-06	1.37785e-06	1.05218e-06
1535.98	8.25	3.83488e-05	3.45073e-05	3.43484e-05	3.41448e-05	3.39742e-05	3.37983e-05	3.36321e-05	3.33466e-05	3.30966e-05	3.28832e-05	3.25516e-05	3.24805e-05	3.1362e-05	3.00118e-05	2.87714e-05	2.44704e-05	2.49996e-05
1544.4	8.25	1.70448e-05	1.5087e-05	1.50129e-05	1.49436e-05	1.48408e-05	1.48048e-05	1.47016e-05	1.45898e-05	1.44701e-05	1.4324e-05	1.40966e-05	1.39205e-05	1.34828e-05	1.29207e-05	1.27879e-05	1.06159e-05	1.03459e-05
1552.81	8.25	2.6105e-07	2.43587e-07	2.15801e-07	2.64025e-07	2.23499e-07	2.00172e-07	2.60019e-07	2.48542e-07	2.52666e-07	2.41634e-07	1.84415e-07	2.13446e-07	2.07522e-07	2.07391e-07	2.88789e-08	1.21156e-07	1.57094e-07
1561.23	8.25	3.88258e-07	3.58298e-07	2.82509e-07	3.22169e-07	3.20064e-07	3.63951e-07	3.22139e-07	3.74543e-07	3.266e-07	3.26315e-07	3.09832e-07	3.52421e-07	3.29617e-07	3.99155e-07	2.97948e-07	2.05648e-07	2.4498e-07
1569.65	8.25	0.000155416	0.000152969	0.000152094	0.000151262	0.000150466	0.000149509	0.000148772	0.000147021	0.00014567	0.000144286	0.000141861	0.000139532	0.000135465	0.000129414	0.00012061	0.000106436	0.000100676
1578.06	8.25	0.00017265	0.000174191	0.000173192	0.00017231	0.000171392	0.000170485	0.000169611	0.000167843	0.000166205	0.000164764	0.000162068	0.000159868	0.000155857	0.000150036	0.000141824	0.000124785	0.000115542
1586.48	8.25	2.27673e-05	2.02904e-05	2.01258e-05	1.99718e-05	1.97949e-05	1.97314e-05	1.95845e-05	1.93246e-05	1.91154e-05	1.89382e-05	1.85226e-05	1.81163e-05	1.73696e-05	1.64253e-05	1.56151e-05	1.24361e-05	1.23083e-05
1594.9	8.25	1.01584e-05	8.55935e-06	8.50176e-06	8.52259e-06	8.46765e-06	8.42796e-06	8.35959e-06	8.36829e-06	8.34096e-06	8.28971e-06	8.29825e-06	8.46973e-06	8.11688e-06	7.63178e-06	6.59217e-06	4.39254e-06	4.53389e-06
1603.31	8.25	0.000201944	0.000208945	0.00020782	0.000206673	0.000205666	0.000204625	0.000203602	0.000201521	0.000199599	0.000197915	0.00019452	0.000191705	0.00018645	0.000178236	0.000166411	0.000144164	0.000132351
1611.73	8.25	0.000141592	0.000143189	0.000142384	0.000141553	0.000140657	0.00014007	0.000139173	0.000137826	0.000136365	0.000135306	0.000132735	0.000130663	0.000126922	0.000121171	0.000113698	9.75297e-05	9.14566e-05
1620.15	8.25	1.46676e-05	1.1833e-05	1.16813e-05	1.16377e-05	1.15448e-05	1.14403e-05	1.12324e-05	1.10405e-05	1.0779e-05	1.06609e-05	1.01499e-05	9.84538e-06	9.32415e-06	8.85293e-06	8.65294e-06	7.74237e-06	7.92652e-06
1628.56	8.25	4.01263e-06	3.51681e-06	3.5057e-06	3.38403e-06	3.25496e-06	3.23437e-06	3.04024e-06	3.03464e-06	2.67923e-06	2.59654e-06	2.69512e-06	2.61575e-06	2.55453e-06	2.26861e-06	1.52442e-06	-3.28873e-07	-8.34849e-07
1636.98	8.25	1.15257e-05	1.02113e-05	1.01281e-05	1.00335e-05	9.9781e-06	9.91149e-06	9.84596e-06	9.67981e-06	9.64471e-06	9.59058e-06	9.45279e-06	9.43475e-06	9.06714e-06	8.56201e-06	7.59294e-06	5.42804e-06	5.81095e-06
1645.4	8.25	3.31897e-05	3.0285e-05	3.01252e-05	2.99754e-05	2.9837e-05	2.96904e-05	2.95942e-05	2.93947e-05	2.924e-05	2.90745e-05	2.89291e-05	2.90113e-05	2.80253e-05	2.68055e-05	2.56581e-05	2.20486e-05	2.43403e-05
1653.81	8.25	1.50596e-05	1.33338e-05	1.31935e-05	1.31348e-05	1.30814e-05	1.29823e-05	1.30091e-05	1.2877e-05	1.27538e-05	1.26792e-05	1.2578e-05	1.26436e-05	1.22715e-05	1.17407e-05	1.18957e-05	1.04207e-05	1.21698e-05
1662.23	8.25	2.57702e-06	2.26996e-06	2.15985e-06	2.18053e-06	2.0483e-06	2.0494e-06	2.04601e-06	1.9649e-06	1.8893e-06	1.94395e-06	1.90423e-06	1.95074e-06	1.76665e-06	1.49187e-06	1.01201e-06	1.72068e-07	3.77538e-08
1670.65	8.25	1.11583e-06	9.017e-07	9.24644e-07	9.08616e-07	8.99103e-07	9.29528e-07	9.08453e-07	8.84193e-07	8.62861e-07	8.5461e-07	8.61567e-07	8.41338e-07	7.65429e-07	7.27915e-07	7.62327e-07	6.24643e-07	7.49553e-07
1679.06	8.25	2.42939e-07	2.18854e-07	2.66877e-07	2.13825e-07	1.57571e-07	2.40571e-07	2.43123e-07	2.69393e-07	1.87121e-07	2.09806e-07	1.25593e-07	1.87421e-07	1.81462e-07	1.2176e-07	1.62759e-07	1.60192e-07	1.73547e-07
1687.48	8.25	1.45838e-07	1.31232e-07	9.00479e-08	7.31886e-08	8.17146e-08	5.19344e-08	1.28777e-07	9.22263e-08	7.69997e-08	7.16385e-08	1.52245e-07	6.82682e-08	5.31228e-08	6.89629e-08	6.78716e-08	7.16877e-08	9.75522e-08
1695.9	8.25	2.30536e-08	2.38987e-08	0	3.62227e-09	2.48387e-08	0	3.58176e-09	6.96577e-09	1.52506e-08	1.62826e-08	0	1.45239e-08	4.74559e-24	2.01192e-08	1.11108e-08	1.9325e-09	2.63792e-08
1704.31	8.25	1.05968e-08	1.57714e-24	2.51253e-08	2.644e-08	0	2.85125e-08	3.37342e-08	1.17418e-08	0	1.02873e-08	0	5.81e-08	1.84861e-08	-1.48845e-09	2.22001e-08	1.56032e-08	1.96555e-08
1712.73	8.25	1.59021e-08	0	7.49444e-09	2.61325e-08	4.4409e-08	6.68955e-09	0	7.35032e-09	1.94051e-08	2.40067e-08	1.96184e-08	4.37425e-08	2.68256e-08	1.93568e-08	8.13768e-09	1.83876e-08	1.75215e-08
1721.15	8.25	4.90933e-09	1.38551e-08	0	5.50034e-08	1.79353e-08	0	0	0	3.97958e-08	3.4948e-08	2.47685e-09	0	0	2.27594e-08	8.54577e-10	1.76607e-09	2.02969e-08
1729.56	8.25	0	-4.79679e-09	-9.73875e-09	0	0	-1.71667e-24	3.813e-09	1.1544e-08	-4.39707e-24	0	-4.28186e-09	1.58845e-08	0	0	3.05559e-09	-9.98203e-10	3.48848e-09
1737.98	8.25	0	1.25072e-08	0	1.84694e-08	0	0	0	1.98582e-08	1.94252e-08	0	0	5.96105e-08	0	0	8.656e-09	1.09198e-08	3.30562e-08
1746.4	8.25	0	0	0	0	0	0	0	0	0	0	0	0	0	-6.24192e-09	-4.01707e-09	-8.14825e-09	-8.62306e-09
1754.81	8.25	2.70697e-07	2.81998e-07	1.68989e-07	2.29406e-07	2.24865e-07	2.54335e-07	2.32781e-07	2.24021e-07	2.29562e-07	1.89989e-07	1.97496e-07	2.32909e-07	1.50022e-07	1.75468e-07	2.30248e-07	1.92408e-07	2.63543e-07
1763.23	8.25	1.74495e-07	2.37864e-07	1.57206e-07	1.93622e-07	1.27533e-07	2.22103e-07	1.89202e-07	1.34357e-07	2.053e-07	1.41002e-07	7.50445e-08	1.04128e-07	1.61641e-07	1.16515e-07	1.38416e-07	1.11065e-07	1.56168e-07
1771.65	8.25	3.93685e-08	5.09802e-08	5.7483e-08	4.17531e-08	8.8716e-08	7.05682e-09	2.79265e-08	3.89525e-08	2.79134e-08	6.31379e-08	1.63416e-08	5.16256e-08	2.6955e-08	8.41785e-08	3.54585e-08	3.6093e-08	-1.69721e-09
1780.06	8.25	0	1.94876e-08	0	5.26831e-24	1.07881e-08	1.4694e-08	1.24788e-08	-2.35888e-09	3.81282e-10	4.81352e-08	1.62024e-09	4.48235e-09	0	0	1.03189e-08	2.86049e-09	-4.97575e-09
1788.48	8.25	3.72669e-07	1.57623e-07	2.03358e-07	1.71e-07	1.30435e-07	1.5594e-07	2.82913e-07	2.65154e-07	1.47173e-07	2.39907e-07	1.87975e-07	1.62903e-07	3.49647e-07	1.18907e-07	2.07667e-07	2.70355e-07	2.78403e-07
1796.9	8.25	8.59613e-08	7.30958e-08	1.02728e-07	8.377e-08	9.7495e-08	1.57485e-07	8.93996e-08	1.16239e-07	9.27421e-08	9.90059e-08	5.35932e-08	1.34841e-07	9.51226e-08	1.15553e-07	1.66034e-07	2.02389e-07	2.09936e-07
1805.31	8.25	1.28515e-07	9.05915e-09	6.39954e-08	2.03102e-08	1.18049e-08	1.03923e-07	5.30319e-08	1.08921e-07	6.3411e-09	1.18235e-08	1.26552e-08	5.08701e-08	1.20284e-08	1.94573e-08	3.97617e-08	3.62635e-08	4.35708e-08
1813.73	8.25	1.29361e-08	5.46073e-08	3.08027e-09	4.36093e-09	4.94929e-09	3.00097e-08	2.80953e-08	1.02449e-09	-2.18528e-09	-8.52103e-10	9.66985e-09	3.23723e-08	-8.60931e-10	1.82111e-08	2.04612e-08	1.15906e-08	-1.12742e-08
1822.15	8.25	-1.18479e-08	-4.7704e-08	-4.97202e-08	-3.57505e-08	-5.0559e-08	-4.55142e-08	-3.34894e-08	-4.73557e-08	-5.40374e-08	-4.10962e-08	-3.21369e-08	-4.79396e-08	-4.6855e-08	-6.23566e-08	-6.84675e-08	-1.38277e-07	-9.43267e-08
1830.56	8.25	6.75223e-08	1.33571e-07	1.28353e-07	1.33938e-07	1.28734e-07	1.34365e-07	1.29171e-07	9.96942e-08	1.15208e-07	1.36367e-07	1.26831e-07	1.39978e-07	1.36793e-07	1.65761e-07	1.2482e-07	1.4097e-07	1.38722e-07
1838.98	8.25	-1.80511e-08	-1.84834e-08	-1.97966e-08	-1.84855e-08	-1.84868e-08	-1.84883e-08	-1.849e-08	-1.84941e-08	-1.84994e-08	-2.17966e-08	-1.98406e-08	-1.85558e-08	-1.5295e-08	-1.5388e-08	-1.56947e-08	-1.63346e-08	-1.70086e-08
1847.4	8.25	-3.03308e-08	-4.95282e-08	-4.95963e-08	-4.96684e-08	-4.97455e-08	-5.27189e-08	-5.28111e-08	-5.17667e-08	-5.19888e-08	-5.22381e-08	-5.28308e-08	-5.35688e-08	-5.27434e-08	-5.44812e-08	-5.87828e-08	-6.53699e-08	-3.17678e-08
1855.82	8.25	-7.39485e-08	-8.85687e-08	-9.0605e-08	-9.06549e-08	-9.0709e-08	-9.07679e-08	-9.08319e-08	-9.09766e-08	-9.11461e-08	-5.35543e-08	-9.18435e-08	-9.25116e-08	-5.96546e-08	-9.52776e-08	-1.00309e-07	-1.0884e-07	-1.1714e-07
1864.23	8.25	7.02023e-08	1.48503e-07	1.36847e-07	1.37143e-07	1.58105e-07	1.1888e-07	2.27646e-07	1.55988e-07	1.2174e-07	1.40769e-07	1.7149e-07	1.91242e-07	1.94558e-07	1.91743e-07	1.91692e-07	2.13396e-07	1.94549e-07
1872.65	8.25	1.95052e-05	1.94695e-05	1.94793e-05	1.95315e-05	1.96316e-05	1.95675e-05	1.94347e-05	1.9522e-05	1.96136e-05	1.94996e-05	1.95398e-05	1.94649e-05	1.95185e-05	1.95366e-05	1.96355e-05	1.98921e-05	2.01109e-05
1881.07	8.25	5.90861e-05	4.51372e-05	4.50654e-05	4.49792e-05	4.49037e-05	4.47741e-05	4.47945e-05	4.4579e-05	4.43895e-05	4.41901e-05	4.3837e-05	4.33182e-05	4.28275e-05	4.1964e-05	4.03759e-05	3.84471e-05	3.70049e-05
1889.48	8.25	1.61796e-05	1.59425e-05	1.59607e-05	1.59353e-05	1.59319e-05	1.59075e-05	1.5948e-05	1.59061e-05	1.5966e-05	1.5971e-05	1.59542e-05	1.60597e-05	1.61185e-05	1.62701e-05	1.68069e-05	1.78288e-05	1.89883e-05
1897.9	8.25	4.16364e-06	5.49763e-06	5.47803e-06	5.51072e-06	5.51277e-06	5.53613e-06	5.50582e-06	5.55761e-06	5.57592e-06	5.59442e-06	5.61092e-06	5.73317e-06	5.81649e-06	5.92354e-06	6.47537e-06	7.30238e-06	8.02886e-06
1906.32	8.25	3.23262e-06	4.91167e-06	4.85188e-06	4.96536e-06	4.87697e-06	4.88539e-06	4.91226e-06	4.93932e-06	5.03004e-06	4.97131e-06	5.02057e-06	5.12342e-06	5.19718e-06	5.37279e-06	5.80871e-06	6.43804e-06	7.05989e-06
1914.73	8.25	6.07279e-07	8.62393e-07	8.6271e-07	9.00546e-07	8.22193e-07	9.59133e-07	8.79331e-07	9.00075e-07	9.16514e-07	9.27908e-07	9.3087e-07	9.00238e-07	9.05674e-07	9.80757e-07	1.02948e-06	1.06056e-06	1.23234e-06
1923.15	8.25	5.2856e-07	6.45731e-07	6.45878e-07	6.15705e-07	6.49846e-07	6.31883e-07	6.61629e-07	7.01912e-07	7.17125e-07	6.45027e-07	6.39185e-07	6.38797e-07	6.50869e-07	7.08831e-07	7.33856e-07	7.85395e-07	9.32101e-07
1931.57	8.25	2.75929e-06	1.86365e-06	1.76741e-06	1.82817e-06	1.79768e-06	1.80397e-06	1.78769e-06	1.81075e-06	1.79333e-06	1.75702e-06	1.77827e-06	1.76281e-06	1.71701e-06	1.75664e-06	1.78041e-06	1.94866e-06	1.99393e-06
1939.98	8.25	0.00012841	7.82159e-05	7.74897e-05	7.67847e-05	7.59884e-05	7.52365e-05	7.45578e-05	7.30647e-05	7.17013e-05	7.02954e-05	6.74435e-05	6.48147e-05	6.21123e-05	5.81537e-05	5.20778e-05	4.69698e-05	4.31177e-05
1948.4	8.25	0.000721138	0.000568833	0.00056534	0.000561779	0.000558208	0.000554583	0.000550944	0.000543695	0.000536326	0.000528912	0.000513865	0.000498495	0.000482537	0.000456956	0.000408427	0.00035699	0.000306979
1956.82	8.25	0.00153555	0.00119366	0.00118772	0.0011816	0.00117546	0.00116927	0.00116296	0.00115026	0.00113729	0.00112395	0.00109659	0.00106788	0.00103724	0.000987203	0.000888458	0.000779589	0.000680764
1965.23	8.25	0.00114573	0.00094666	0.000941454	0.000936172	0.000931148	0.000925851	0.000920605	0.000910164	0.000899756	0.000889229	0.000867866	0.00084599	0.000823232	0.000787056	0.00071777	0.000644404	0.000571725
1973.65	8.25	0.000377677	0.000344269	0.000342271	0.000340403	0.000338432	0.000336562	0.000334545	0.000330745	0.000326928	0.000322965	0.000315043	0.00030713	0.000298193	0.000283849	0.000255489	0.000223824	0.000191361
1982.07	8.25	6.31229e-05	5.45557e-05	5.41442e-05	5.38474e-05	5.37405e-05	5.32667e-05	5.31654e-05	5.21918e-05	5.18694e-05	5.16316e-05	5.05541e-05	4.99103e-05	4.8789e-05	4.6813e-05	4.43947e-05	3.76101e-05	3.69983e-05
1990.48	8.25	4.83652e-05	4.34266e-05	4.33323e-05	4.31115e-05	4.2974e-05	4.29272e-05	4.28065e-05	4.26978e-05	4.264e-05	4.2617e-05	4.30833e-05	4.35401e-05	4.26239e-05	4.15544e-05	4.11463e-05	3.88403e-05	4.32487e-05
1998.9	8.25	0.00108292	0.000943378	0.000939628	0.00093591	0.000932154	0.00092836	0.000924448	0.000916632	0.000908689	0.000900645	0.000883948	0.000866449	0.00084825	0.000818129	0.00075493	0.000685353	0.000613892
2007.32	8.25	0.00282929	0.00225672	0.00224419	0.00223165	0.00221883	0.0022059	0.00219285	0.00216633	0.00213909	0.00211118	0.00205321	0.0019914	0.00193077	0.00183046	0.00162684	0.00141441	0.00121526
2015.73	8.25	0.00274892	0.00208834	0.00207504	0.00206155	0.00204806	0.00203449	0.00202083	0.00199333	0.00196548	0.00193708	0.00187907	0.0018187	0.00175914	0.00166278	0.00147359	0.00128174	0.00109968
2024.15	8.25	0.000836478	0.000726265	0.000722003	0.000717909	0.000713559	0.000709379	0.000705151	0.00069657	0.000688061	0.000679518	0.000661952	0.000643887	0.000626428	0.000598211	0.000542144	0.000483573	0.00042094
2032.57	8.25	0.000305675	0.000270309	0.00026846	0.000266623	0.000264995	0.00026331	0.000261634	0.000258503	0.000255455	0.000252679	0.000247591	0.000243106	0.000235303	0.000224676	0.000207968	0.000176788	0.000170974
2040.98	8.25	0.00030305	0.000288611	0.000287536	0.000286004	0.000284731	0.000283315	0.000282217	0.000279431	0.000277182	0.000275081	0.000271291	0.000269251	0.000263548	0.000254586	0.000239764	0.000207321	0.000195374
2049.4	8.25	0.000729746	0.000683629	0.000680236	0.000676406	0.00067286	0.000669345	0.000665696	0.00065823	0.000650302	0.000642248	0.000625998	0.000608526	0.000593074	0.000567355	0.000513235	0.000457247	0.000397232
2057.82	8.25	0.00087194	0.000783755	0.000779699	0.000775877	0.000772001	0.000768224	0.000764137	0.000756211	0.000748476	0.000740096	0.000723628	0.000706307	0.000689657	0.000662465	0.000607127	0.000550097	0.000490742
2066.23	8.25	0.000913001	0.000798769	0.000794263	0.000789984	0.000785446	0.000780992	0.000776536	0.000767604	0.000758514	0.00074931	0.000730407	0.000710848	0.000693107	0.000664451	0.000607586	0.00055042	0.000492061
2074.65	8.25	0.00059109	0.000552865	0.000549732	0.000546783	0.000543496	0.000540736	0.000537674	0.000531526	0.000525392	0.000519284	0.000506808	0.000494212	0.000481277	0.000460894	0.000419091	0.000368036	0.000318198
2083.07	8.25	0.000311534	0.000281002	0.000279183	0.00027744	0.000275779	0.000274062	0.000272282	0.000269144	0.000266296	0.000263472	0.000258609	0.000254957	0.000247024	0.000235097	0.000217697	0.000183012	0.000174973
2091.48	8.25	0.000187914	0.000165948	0.000164787	0.000163573	0.000162436	0.000161367	0.000160237	0.000158024	0.000156121	0.000154214	0.00015114	0.000148911	0.000143476	0.000136055	0.0001275	0.000100333	0.000102186
2099.9	8.25	6.5578e-05	5.84428e-05	5.7929e-05	5.77409e-05	5.73344e-05	5.70584e-05	5.67259e-05	5.60844e-05	5.61039e-05	5.59188e-05	5.62429e-05	5.63347e-05	5.44638e-05	5.25012e-05	4.95232e-05	3.44248e-05	4.59618e-05
2108.32	8.25	2.6494e-05	2.33424e-05	2.31683e-05	2.30902e-05	2.30053e-05	2.29743e-05	2.28027e-05	2.28539e-05	2.28538e-05	2.26606e-05	2.28901e-05	2.32327e-05	2.29697e-05	2.22535e-05	1.7295e-05	1.12134e-05	2.36236e-05
2116.73	8.25	1.80208e-05	1.48507e-05	1.48392e-05	1.42966e-05	1.42671e-05	1.37325e-05	1.36145e-05	1.35047e-05	1.30492e-05	1.23847e-05	1.16958e-05	1.15027e-05	1.02375e-05	8.49523e-06	5.84185e-06	-1.80117e-06	-5.95781e-06
2125.15	8.25	3.21142e-06	2.92746e-06	2.70509e-06	2.75186e-06	2.67629e-06	2.59268e-06	2.49629e-06	2.46922e-06	2.35734e-06	2.40949e-06	2.26039e-06	2.22399e-06	2.05744e-06	1.79978e-06	1.96786e-06	7.95453e-07	1.5031e-06
2133.57	8.25	1.88898e-06	1.64954e-06	1.51836e-06	1.5253e-06	1.44362e-06	1.37623e-06	1.41263e-06	1.29484e-06	1.23405e-06	1.25804e-06	1.1919e-06	1.17485e-06	1.02208e-06	8.23548e-07	6.05233e-07	-9.37698e-07	-5.37224e-07
2141.98	8.25	2.39817e-06	1.98049e-06	2.0011e-06	1.87145e-06	1.84745e-06	1.85988e-06	1.82638e-06	1.62035e-06	1.3413e-06	1.36275e-06	8.16916e-07	7.1104e-07	4.30243e-07	3.89989e-07	4.00968e-07	-3.27909e-06	-5.39261e-06
2150.4	8.25	1.98416e-05	1.73803e-05	1.69749e-05	1.69327e-05	1.67708e-05	1.65012e-05	1.63273e-05	1.60974e-05	1.5723e-05	1.54132e-05	1.4815e-05	1.43191e-05	1.46334e-05	1.57105e-05	2.06439e-05	1.86915e-05	2.55993e-05
2158.82	8.25	1.1684e-05	1.01425e-05	9.95802e-06	9.79093e-06	9.90648e-06	9.62589e-06	9.18982e-06	9.0036e-06	8.64816e-06	8.55913e-06	8.06567e-06	7.71094e-06	7.02369e-06	6.01789e-06	4.39523e-06	3.8254e-06	9.8251e-06
2167.23	8.25	9.37419e-06	8.61017e-06	8.44369e-06	8.47001e-06	8.04544e-06	8.10558e-06	8.07212e-06	7.59826e-06	7.73122e-06	7.52667e-06	7.34181e-06	7.38015e-06	6.88848e-06	6.1335e-06	4.72748e-06	1.78849e-06	4.34239e-06
2175.65	8.25	2.63896e-06	1.8773e-06	1.97503e-06	2.01736e-06	2.03368e-06	1.91941e-06	2.06302e-06	2.0866e-06	2.04591e-06	1.8589e-06	1.60835e-06	1.51544e-06	1.15908e-06	1.15342e-07	-1.25826e-06	-3.58341e-06	-6.17647e-06
2184.07	8.25	6.42121e-07	6.21698e-07	5.80599e-07	6.17003e-07	3.87805e-07	5.65691e-07	4.57977e-07	7.09015e-07	5.80913e-07	5.03657e-07	5.19018e-07	5.54397e-07	5.51512e-07	5.3583e-07	5.13186e-07	3.91176e-07	5.55704e-07
2192.48	8.25	8.24869e-07	5.89198e-07	7.29081e-07	7.01487e-07	6.48625e-07	6.19807e-07	5.76316e-07	6.28995e-07	6.27013e-07	6.09706e-07	6.39432e-07	6.36429e-07	6.24411e-07	5.79204e-07	5.98069e-07	4.60905e-07	6.39287e-07
2200.9	8.25	1.73183e-07	1.41348e-07	1.64473e-07	2.09726e-07	1.10897e-07	1.80547e-07	1.25153e-07	5.58142e-08	2.10183e-07	9.32044e-08	1.11097e-07	8.52426e-08	1.00453e-07	5.58949e-08	1.1966e-07	1.29288e-07	1.05981e-07
2209.32	8.25	2.86582e-07	1.96286e-07	2.67741e-07	2.2913e-07	1.27726e-07	2.36508e-07	1.32582e-07	1.74095e-07	1.93519e-07	2.31493e-07	2.1769e-07	2.45524e-07	2.10517e-07	1.80627e-07	2.0929e-07	1.1962e-07	2.79366e-07
2217.73	8.25	1.96808e-07	4.1285e-08	1.33839e-07	2.5192e-07	1.48233e-07	2.12379e-07	1.7725e-07	2.17721e-07	2.4583e-07	1.51168e-07	1.51662e-07	1.55062e-07	1.74059e-07	1.50146e-07	1.67202e-07	9.01559e-08	2.56727e-07
2226.15	8.25	6.93444e-08	6.25631e-08	3.24206e-07	1.12752e-07	1.46427e-07	2.96236e-07	1.43342e-07	9.75758e-08	2.99882e-07	1.5676e-07	1.65561e-07	1.33069e-07	1.38218e-07	1.56477e-07	1.52071e-07	5.04235e-08	3.43411e-08
2234.57	8.25	1.80751e-08	9.25677e-08	0	1.27006e-07	9.9766e-08	3.61582e-08	4.95597e-09	2.28955e-08	3.03401e-08	6.71947e-08	4.51386e-08	4.02295e-08	3.22755e-08	4.76357e-08	1.28682e-09	6.35948e-08	5.47358e-08
2242.98	8.25	1.29496e-08	7.32457e-08	1.22548e-07	8.5107e-08	5.12396e-09	9.56973e-08	1.95277e-08	1.56407e-08	2.96208e-08	3.22907e-08	3.05205e-08	1.95322e-08	5.21018e-08	4.91125e-08	4.90838e-08	1.48364e-08	0
2251.4	8.25	1.07203e-07	1.97481e-07	1.38846e-07	1.80184e-07	2.33746e-07	1.22082e-07	2.02494e-07	1.49762e-07	1.50448e-07	1.56051e-07	1.37145e-07	1.57532e-07	1.41578e-07	1.3382e-07	1.24346e-07	2.60406e-07	1.11018e-07
2259.82	8.25	1.0889e-07	1.1122e-07	1.06884e-07	2.00603e-07	1.19275e-07	2.05962e-07	3.40055e-07	1.10674e-07	1.13386e-07	1.08292e-07	1.30633e-07	1.00621e-07	1.00294e-07	1.40712e-07	8.39656e-08	1.1484e-07	7.91465e-08
2268.23	8.25	2.9021e-08	-3.79774e-08	5.99519e-08	9.10263e-09	2.55785e-09	8.23651e-09	1.89648e-08	2.76963e-08	2.24186e-08	2.34821e-08	5.53974e-09	1.91907e-08	5.71896e-08	1.94405e-08	1.47485e-08	1.141e-07	1.40069e-08
2276.65	8.25	2.20024e-23	1.14413e-24	2.54797e-08	9.21348e-08	2.39361e-08	2.50757e-08	2.00304e-08	6.33195e-08	6.29642e-08	2.81685e-08	6.36046e-08	4.51281e-08	6.85543e-08	6.13433e-08	3.4051e-08	1.18443e-07	2.87103e-08
2285.07	8.25	0	0	1.13154e-08	1.78992e-09	2.16466e-24	1.19856e-08	8.65549e-09	1.52028e-08	1.22184e-08	9.84805e-09	2.1092e-08	9.56178e-09	3.21373e-08	-4.87272e-10	-4.6968e-09	2.67426e-08	-4.49301e-08
2293.48	8.25	0	0	1.26917e-08	1.21158e-08	1.15238e-08	0	0	1.50395e-08	0	5.96775e-09	1.98731e-08	0	7.71471e-09	5.94651e-08	3.99202e-08	5.06628e-08	2.52311e-08
2301.9	8.25	0	4.85328e-09	0	0	3.03965e-09	0	0	-1.33228e-09	5.75446e-09	7.66152e-09	0	0	2.283e-08	8.11331e-24	2.07228e-08	4.94907e-09	-2.47673e-08
2310.32	8.25	0	0	0	3.42261e-08	0	0	4.40586e-08	0	1.34785e-08	2.01416e-09	0	0	0	-9.764e-09	2.7492e-08	-2.40773e-08	-2.09622e-09
2318.73	8.25	0	0	5.36993e-25	3.29254e-08	1.22079e-08	8.80266e-09	5.74921e-09	6.66519e-09	5.36793e-09	8.55723e-09	1.16319e-08	1.47354e-08	0	0	0	-1.16939e-08	-2.94571e-09
2327.15	8.25	0	0	0	0	7.17357e-09	0	5.07096e-24	5.54193e-09	0	0	0	-8.54388e-09	0	0	0	0	1.3124e-08
2335.57	8.25	0	0	0	-5.19467e-09	0	-5.34177e-09	2.87455e-24	0	-6.11314e-09	-3.25685e-09	0	0	0	-1.29691e-08	0	0	1.06114e-08
2343.98	8.25	0	0	3.63029e-09	-1.3836e-08	3.84181e-09	2.83381e-08	1.74744e-24	1.60013e-08	0	1.8766e-08	1.74147e-08	0	0	-1.85327e-08	0	0	1.00241e-08
2352.4	8.25	0	0	8.82493e-09	6.04863e-09	1.13343e-08	3.69303e-09	0	0	1.42488e-09	-5.08313e-09	0	0	0	3.84035e-08	0	0	3.99866e-24
2360.82	8.25	0	0	0	0	0	0	0	0	2.46673e-24	0	0	0	-1.34948e-08	0	0	8.63111e-08	5.80145e-09
2369.23	8.25	0	-2.67233e-09	8.15604e-09	0	0	0	0	2.5656e-09	0	-9.49996e-25	-2.31583e-08	0	4.68791e-08	0	0	0	-5.30925e-09
2377.65	8.25	0	-1.39828e-08	2.05883e-08	-7.14036e-09	0	0	0	1.46006e-08	0	1.02619e-08	4.99302e-25	0	3.7635e-24	0	2.68873e-08	0	1.08417e-08
2386.07	8.25	0	0	0	4.98825e-09	0	1.79977e-08	-6.58285e-09	0	0	0	3.60687e-25	1.25056e-08	2.0136e-09	0	0	0	-1.46829e-08
2394.48	8.25	0	3.09511e-09	3.18151e-09	-8.90616e-09	0	0	-6.77574e-09	0	1.69426e-08	0	0	0	-2.48185e-08	2.68222e-08	-4.51986e-08	0	1.08523e-08
2402.9	8.25	0	3.00357e-09	3.08836e-09	0	0	8.68398e-09	0	0	4.87387e-09	0	0	0	0	0	0	0	3.12129e-08
2411.32	8.25	0	3.19607e-09	5.91084e-24	0	9.07366e-09	1.37477e-08	0	3.36485e-09	7.30681e-24	0	7.17125e-09	0	3.00645e-08	3.7854e-08	3.87205e-08	-2.14608e-08	-7.01626e-09
2419.73	8.25	0	2.92092e-09	0	1.18841e-08	0	3.02245e-24	0	0	0	1.12581e-08	0	4.81826e-09	0	0	0	4.83446e-09	-7.45596e-09
2428.15	8.25	0	0	5.80086e-09	1.15439e-08	0	3.46244e-09	0	6.12463e-09	6.04066e-09	1.73379e-08	0	0	1.31643e-08	2.20953e-08	0	0	-5.64292e-09
2436.57	8.25	9.02352e-09	6.16059e-09	0	4.86979e-09	0	0	0	0	0	0	2.72173e-08	1.3459e-08	0	0	0	-1.16304e-08	-1.66594e-08
2444.98	8.25	8.65808e-09	1.30147e-08	0	4.21331e-09	0	0	1.48262e-08	1.93001e-08	0	0	2.7462e-09	0	0	1.39075e-08	0	2.53308e-08	-3.53585e-09
2453.4	8.25	0	4.83848e-08	1.25646e-08	0	2.37806e-08	5.11058e-09	6.5407e-09	5.17102e-09	1.09164e-08	0	0	4.09085e-08	0	0	1.0193e-07	0	3.61831e-08
2461.82	8.25	0	1.23706e-08	1.58741e-08	9.67951e-09	0	9.04366e-09	1.80628e-08	2.49703e-08	5.90291e-09	2.98941e-08	0	2.60435e-08	1.57232e-08	3.90751e-08	3.67179e-08	7.70349e-09	1.99696e-08
2470.23	8.25	3.72543e-09	1.34938e-07	4.73363e-08	2.55911e-08	2.66251e-08	1.13821e-07	1.06802e-07	1.52682e-07	4.38535e-08	9.32624e-08	7.25687e-08	1.06306e-07	5.49859e-08	4.07707e-08	5.91223e-09	2.46555e-08	5.95995e-08
2478.65	8.25	3.64298e-07	2.38363e-07	2.43481e-07	2.44231e-07	2.17228e-07	2.15129e-07	2.26663e-07	2.25101e-07	2.08017e-07	2.46646e-07	2.31304e-07	2.00266e-07	2.10084e-07	1.80875e-07	1.86466e-07	2.28702e-07	2.61139e-07
2487.07	8.25	5.63234e-06	5.37196e-06	5.3671e-06	5.32345e-06	5.32749e-06	5.3415e-06	5.37753e-06	5.34711e-06	5.35807e-06	5.44087e-06	5.47421e-06	5.49942e-06	5.60476e-06	5.73254e-06	6.31403e-06	7.99054e-06	1.00467e-05
2495.48	8.25	1.68885e-06	1.54937e-06	1.60977e-06	1.55024e-06	1.54517e-06	1.5282e-06	1.50268e-06	1.55507e-06	1.54096e-06	1.50669e-06	1.52991e-06	1.44498e-06	1.47222e-06	1.43237e-06	1.58417e-06	1.58619e-06	1.70601e-06
2503.9	8.25	1.4648e-06	1.25841e-06	1.25185e-06	1.25234e-06	1.31332e-06	1.28297e-06	1.30761e-06	1.22406e-06	1.26832e-06	1.27219e-06	1.20354e-06	1.21607e-06	1.14744e-06	1.18321e-06	1.0164e-06	1.24154e-06	1.31001e-06
2512.32	8.25	1.55896e-06	1.20122e-06	1.19975e-06	1.17552e-06	1.20546e-06	1.11606e-06	1.20595e-06	1.07193e-06	1.21295e-06	1.15834e-06	1.11782e-06	1.20405e-06	1.14184e-06	1.00538e-06	1.09953e-06	1.13557e-06	1.25254e-06
2520.73	8.25	1.25754e-06	7.85324e-07	9.24406e-07	8.8906e-07	8.89173e-07	9.10942e-07	8.49438e-07	8.52366e-07	8.24333e-07	8.74734e-07	9.64408e-07	8.26155e-07	7.64601e-07	8.90942e-07	7.07472e-07	7.35053e-07	7.09188e-07

## Sheet: k_GF5
Wavelength	FWHM	k_Summer_L	k_Summer_M	k_Summer_H	k_Winter_L	k_Winter_M	k_Winter_H	k_1976_L	k_1976_M	k_1976_H
1004.77	7.67828	0	0	0	0	0	0	0	0	0	0	0	0	0	0	0	0	0
1013.2	7.68189	0	0	0	0	0	0	0	0	0	0	0	0	0	0	0	0	0
1021.62	7.68551	0	0	0	0	0	0	0	0	0	0	0	0	0	0	0	0	0
1030.05	7.68912	0	0	0	0	0	0	0	0	0	0	0	0	0	0	0	0	0
1038.48	7.69273	6.6223e-07	5.63105e-07	5.63528e-07	5.64015e-07	5.6463e-07	5.4707e-07	5.53519e-07	5.58807e-07	5.29596e-07	5.39144e-07	5.22345e-07	5.20507e-07	5.13575e-07	4.77198e-07	4.75691e-07	4.13527e-07	4.4946e-07
1046.91	7.69634	6.22427e-07	4.50496e-07	4.52878e-07	4.36114e-07	4.41912e-07	4.44103e-07	4.23018e-07	4.18911e-07	3.87243e-07	3.66515e-07	3.0957e-07	2.83785e-07	2.07148e-07	7.52291e-08	-1.33689e-07	-3.37349e-07	-4.20724e-07
1055.33	7.69995	6.7981e-07	5.66768e-07	5.64981e-07	5.64739e-07	5.50285e-07	5.43045e-07	5.22289e-07	5.12106e-07	4.61774e-07	4.41156e-07	3.6997e-07	3.43037e-07	3.11256e-07	2.85857e-07	1.9696e-07	8.00423e-08	-1.23173e-08
1063.76	7.70356	3.03527e-07	2.45418e-07	2.41704e-07	2.43263e-07	2.39961e-07	2.45065e-07	2.39655e-07	2.49248e-07	2.41507e-07	2.43999e-07	2.23385e-07	2.52601e-07	2.37745e-07	2.24872e-07	2.05667e-07	1.95852e-07	1.90929e-07
1072.19	7.70718	4.14676e-08	4.7289e-08	4.60797e-08	4.95765e-08	4.54598e-08	2.93261e-08	4.05863e-08	4.46346e-08	3.96307e-08	3.71941e-08	2.6909e-08	2.92651e-08	5.09664e-08	3.62022e-08	3.45466e-08	1.82094e-08	1.64136e-08
1080.62	7.71079	7.17707e-09	3.18986e-09	7.70057e-11	5.53963e-10	1.92915e-09	3.96618e-09	1.93367e-09	3.94008e-09	8.74126e-09	1.8399e-09	1.1816e-24	2.12284e-09	5.92143e-09	1.0548e-08	7.4699e-09	8.59033e-10	3.80984e-09
1089.04	7.7144	0	2.23741e-09	-1.10203e-09	-7.49815e-10	-5.53984e-10	-2.04158e-10	8.7579e-10	0	7.52246e-09	-3.48615e-25	1.28658e-09	1.14197e-09	1.45886e-09	0	1.19322e-09	0	0
1097.47	7.71801	0	-4.25887e-09	7.92919e-10	-8.72078e-10	3.57588e-10	7.21693e-10	2.68837e-09	-1.5735e-09	0	1.38369e-24	-9.14619e-10	0	-4.23771e-09	-5.16351e-10	-2.0394e-09	-5.57248e-09	-7.23407e-09
1105.9	7.72162	0	0	0	0	0	-7.07474e-25	0	0	0	0	0	0	0	0	0	0	0
1114.32	7.72523	0	5.10084e-10	3.3357e-09	0	0	5.02903e-09	0	8.04833e-09	-1.74603e-09	0	6.02843e-09	6.73993e-10	0	0	2.9045e-09	8.0003e-09	-3.5483e-10
1122.75	7.72885	0	0	0	0	0	0	-6.02645e-09	0	1.24991e-09	0	0	0	0	0	0	0	0
1131.18	7.73246	0	6.21688e-09	-4.5306e-09	8.9505e-09	4.58941e-09	0	0	1.81121e-09	5.3121e-09	4.36675e-09	0	3.68913e-09	-9.43298e-09	0	0	0	3.47554e-10
1139.61	7.73607	0	6.04319e-11	0	0	0	0	0	0	0	-1.9294e-09	-1.82151e-09	0	0	0	0	0	0
1148.03	7.73968	0	0	-1.06298e-24	0	0	2.67694e-09	0	0	0	0	0	0	2.52471e-09	0	0	-8.38008e-09	-1.46064e-08
1156.46	7.74329	0	0	0	-2.46541e-09	0	0	0	0	0	0	0	0	0	0	0	0	0
1164.89	7.7469	0	0	0	0	0	0	0	0	0	0	0	0	0	0	0	0	0
1173.32	7.75052	0	0	0	4.28299e-09	0	0	0	0	0	0	0	0	0	0	0	0	0
1181.74	7.75413	0	0	0	0	0	0	0	0	0	0	0	0	0	0	0	0	0
1190.17	7.75774	-1.84544e-09	0	0	0	0	0	0	0	0	0	0	0	0	0	0	0	0
1198.6	7.76135	3.56302e-09	1.08425e-08	1.77612e-09	5.63178e-09	7.70722e-10	5.1737e-10	2.68274e-09	1.54153e-09	2.52804e-09	5.40982e-10	0	7.53692e-09	2.04029e-09	-3.59775e-09	6.11331e-09	-1.76308e-08	6.9754e-09
1206.8	7.3271	4.3607e-05	3.89498e-05	3.87303e-05	3.85422e-05	3.83909e-05	3.82017e-05	3.80413e-05	3.77083e-05	3.74226e-05	3.70795e-05	3.65261e-05	3.60708e-05	3.51547e-05	3.39124e-05	3.25809e-05	2.98529e-05	2.89639e-05
1215.2	7.76857	8.91288e-06	7.54484e-06	7.50035e-06	7.44561e-06	7.39608e-06	7.33493e-06	7.2704e-06	7.16914e-06	7.06974e-06	6.97075e-06	6.83953e-06	6.71867e-06	6.54431e-06	6.30954e-06	6.14102e-06	5.18984e-06	4.89705e-06
1223.6	8.1949	1.95672e-05	1.71563e-05	1.70745e-05	1.69772e-05	1.6903e-05	1.68029e-05	1.67227e-05	1.65606e-05	1.64122e-05	1.62731e-05	1.60199e-05	1.58772e-05	1.54268e-05	1.4842e-05	1.41937e-05	1.26659e-05	1.2461e-05
1232.34	8.48475	1.80035e-06	1.50593e-06	1.49453e-06	1.49649e-06	1.47622e-06	1.46059e-06	1.45759e-06	1.43153e-06	1.40087e-06	1.40322e-06	1.37627e-06	1.36556e-06	1.33495e-06	1.26318e-06	1.22105e-06	1.01983e-06	1.04624e-06
1240.76	8.26	4.51748e-07	3.82422e-07	3.91622e-07	3.82475e-07	3.79291e-07	3.85315e-07	3.75508e-07	3.62923e-07	3.62435e-07	3.51209e-07	3.54526e-07	3.81794e-07	3.67178e-07	3.2123e-07	3.43172e-07	3.27282e-07	3.13248e-07
1249.21	7.78302	1.40261e-07	1.22978e-07	1.13691e-07	1.1199e-07	1.06529e-07	1.20683e-07	1.18825e-07	1.0645e-07	1.07855e-07	1.06877e-07	1.27373e-07	8.8771e-08	9.90353e-08	7.75393e-08	1.1184e-07	7.36214e-08	1.4888e-07
1257.66	7.78663	2.02311e-07	1.72858e-07	1.51512e-07	1.67138e-07	1.53512e-07	1.61667e-07	1.57523e-07	1.81643e-07	1.71105e-07	1.46352e-07	1.67651e-07	1.49149e-07	1.39748e-07	1.39556e-07	1.34705e-07	1.79731e-07	1.62278e-07
1266.1	7.79024	2.43834e-07	2.08695e-07	2.33285e-07	2.2872e-07	2.06832e-07	2.10335e-07	2.05588e-07	1.92268e-07	1.85172e-07	2.14132e-07	1.95898e-07	1.86578e-07	1.56453e-07	1.72129e-07	2.00085e-07	1.88703e-07	2.46717e-07
1274.55	7.79386	8.42036e-09	0	6.5612e-09	2.26081e-09	0	0	4.57292e-09	0	0	0	0	4.22933e-09	6.26979e-24	1.16888e-08	5.17768e-09	1.07925e-08	0
1283	7.79747	4.31521e-08	3.36339e-08	2.72962e-08	3.70418e-08	3.60438e-08	1.69635e-08	1.89902e-08	2.62857e-08	1.4021e-08	3.45324e-08	3.70916e-08	3.894e-08	1.0116e-08	6.75335e-09	1.61182e-08	2.65396e-08	1.46912e-08
1291.45	7.80108	2.27591e-06	1.91918e-06	1.90425e-06	1.90434e-06	1.88249e-06	1.89322e-06	1.89529e-06	1.87168e-06	1.89694e-06	1.8736e-06	1.91749e-06	2.00588e-06	2.0206e-06	1.99137e-06	1.68899e-06	6.94898e-07	-2.64742e-07
1299.9	7.80469	3.85737e-07	3.40453e-07	3.34678e-07	3.19958e-07	3.22834e-07	3.25981e-07	3.23678e-07	3.2185e-07	3.37936e-07	3.29926e-07	3.10306e-07	3.21006e-07	3.05458e-07	2.71486e-07	2.80222e-07	2.18894e-07	2.22937e-07
1308.34	7.8083	4.70167e-08	5.79407e-08	2.7599e-08	3.78457e-08	2.87168e-08	5.74043e-08	5.10074e-08	4.45215e-08	4.25864e-08	3.19861e-08	4.93905e-08	5.65669e-08	3.97911e-08	3.01801e-08	3.0497e-08	4.24749e-08	3.39672e-08
1316.79	7.81191	8.97537e-06	8.07997e-06	8.04979e-06	8.00575e-06	7.9951e-06	7.97435e-06	7.91829e-06	7.86293e-06	7.80273e-06	7.72706e-06	7.69717e-06	7.56137e-06	7.34679e-06	7.05197e-06	6.84473e-06	7.15393e-06	8.15683e-06
1325.24	7.81553	8.61935e-07	7.01349e-07	7.14178e-07	7.1259e-07	7.04508e-07	6.86867e-07	6.80166e-07	6.7289e-07	6.98633e-07	6.77226e-07	6.31796e-07	6.2203e-07	5.60711e-07	5.03245e-07	5.89295e-07	5.78941e-07	2.54724e-07
1333.69	7.81914	7.38366e-07	7.06128e-07	7.24226e-07	6.97566e-07	6.85656e-07	7.02703e-07	6.88453e-07	6.83228e-07	6.86625e-07	6.00805e-07	5.9457e-07	6.27647e-07	5.84529e-07	5.61623e-07	5.57089e-07	6.16193e-07	5.87865e-07
1342.14	7.82275	3.36187e-06	3.07694e-06	3.06881e-06	3.07004e-06	3.08805e-06	3.05965e-06	3.04984e-06	3.05133e-06	3.01685e-06	2.99686e-06	2.94336e-06	2.93356e-06	2.89535e-06	2.93307e-06	2.93124e-06	2.91344e-06	2.92925e-06
1350.58	7.82636	3.42661e-07	2.26823e-07	2.37558e-07	3.42064e-07	2.78202e-07	2.3395e-07	2.27708e-07	3.62026e-07	2.28107e-07	2.55584e-07	2.27637e-07	1.98427e-07	1.85388e-07	3.29392e-07	3.40015e-07	3.00984e-07	2.90062e-07
1359.03	7.82997	1.09731e-07	9.44901e-08	9.55474e-08	8.8035e-08	1.13152e-07	9.75448e-08	9.54608e-08	1.07186e-07	9.54671e-08	8.75368e-08	9.90008e-08	9.50942e-08	8.80157e-08	8.65642e-08	9.78484e-08	1.04304e-07	1.12471e-07
1367.48	7.83358	6.15374e-07	6.12288e-07	5.89885e-07	6.0492e-07	5.99007e-07	5.97492e-07	6.06486e-07	6.12649e-07	6.15841e-07	5.99066e-07	6.06679e-07	6.2019e-07	6.16317e-07	6.20716e-07	5.99155e-07	6.35735e-07	6.68637e-07
1375.93	7.8372	3.60514e-07	4.03294e-07	4.28078e-07	4.51738e-07	4.73561e-07	5.19887e-07	4.37063e-07	4.6508e-07	5.43714e-07	4.41405e-07	4.27179e-07	4.9458e-07	5.09798e-07	3.7751e-07	4.59754e-07	4.78953e-07	5.41854e-07
1384.37	7.84081	8.90401e-08	3.65288e-08	4.17706e-08	5.71796e-08	3.19788e-08	2.78684e-08	3.95141e-08	4.83087e-08	4.73054e-08	3.02219e-08	4.45968e-08	2.4856e-08	4.80953e-08	5.20441e-08	4.39737e-08	4.75964e-08	4.15769e-08
1392.82	7.84442	-2.28683e-09	-8.44985e-09	6.32284e-09	-1.00207e-08	-7.81535e-09	4.52175e-09	-2.19213e-09	4.43173e-08	3.09051e-09	-5.42109e-09	2.6138e-08	1.67041e-09	-2.26434e-09	-1.1415e-08	2.58522e-10	-2.4772e-09	-1.11291e-08
1401.27	7.84803	-8.04994e-10	2.31614e-09	1.32869e-10	2.33549e-09	1.06073e-08	4.61848e-09	4.63986e-09	5.0782e-09	5.13027e-09	2.90497e-09	-5.32198e-09	2.39331e-09	-2.1015e-09	4.82073e-09	1.85857e-10	3.96734e-09	-1.15791e-08
1409.72	7.85164	0	1.35164e-09	-1.2304e-09	1.96762e-08	3.25279e-09	0	1.75772e-09	4.25373e-09	-7.10826e-10	-4.16467e-09	0	-5.26435e-09	4.28502e-09	2.43893e-08	9.82429e-10	-1.18781e-09	0
1418.17	7.85525	7.41684e-08	-3.00132e-10	8.48023e-10	6.51596e-25	-2.62219e-09	0	3.06208e-08	-4.70855e-10	-1.72227e-08	0	1.06227e-08	3.45205e-08	5.6399e-09	-2.25357e-09	2.28368e-09	1.45006e-08	1.83662e-09
1426.61	7.85887	8.49899e-07	5.12712e-07	5.14794e-07	4.98646e-07	5.40383e-07	5.43124e-07	5.51362e-07	4.68019e-07	4.76978e-07	5.06086e-07	4.51461e-07	4.95573e-07	3.60932e-07	4.10479e-07	3.93454e-07	3.7299e-07	3.23134e-07
1435.06	7.86248	0.000319146	0.00026904	0.000267778	0.000266551	0.000265287	0.000264036	0.000262777	0.000260263	0.000257629	0.000255017	0.000249774	0.00024433	0.000238451	0.00022927	0.000212299	0.000193952	0.000176117
1443.51	7.86609	0.000138357	0.000110331	0.0001098	0.000109213	0.000108645	0.000108171	0.000107558	0.000106524	0.000105442	0.000104368	0.00010237	0.000100311	9.79755e-05	9.44056e-05	8.85835e-05	8.2229e-05	7.67216e-05
1451.96	7.8697	1.03141e-05	9.0427e-06	9.02717e-06	9.00289e-06	8.97464e-06	8.91627e-06	8.91337e-06	8.89841e-06	8.89443e-06	8.80515e-06	8.80068e-06	8.82856e-06	8.81467e-06	8.74247e-06	8.92369e-06	9.17382e-06	9.59748e-06
1460.4	7.87331	4.39482e-07	3.13904e-07	3.16852e-07	3.3323e-07	3.07123e-07	3.0355e-07	3.28587e-07	3.23931e-07	2.88222e-07	3.15551e-07	2.94878e-07	2.57529e-07	2.51146e-07	3.30127e-07	2.8435e-07	1.34267e-07	2.74073e-07
1468.85	7.87692	4.48882e-06	4.12985e-06	4.14884e-06	4.13746e-06	4.10327e-06	4.11351e-06	4.11605e-06	4.11905e-06	4.12968e-06	4.07778e-06	4.08648e-06	4.08635e-06	4.07274e-06	4.00865e-06	4.03528e-06	4.00298e-06	4.0431e-06
1477.3	7.88054	9.76102e-06	9.54764e-06	9.58297e-06	9.55484e-06	9.54767e-06	9.56061e-06	9.53351e-06	9.47727e-06	9.55032e-06	9.54452e-06	9.50306e-06	9.56134e-06	9.63458e-06	9.73845e-06	1.01156e-05	1.05428e-05	1.1047e-05
1485.75	7.88415	1.86891e-06	1.66128e-06	1.6258e-06	1.66098e-06	1.63066e-06	1.62285e-06	1.61402e-06	1.629e-06	1.65553e-06	1.64046e-06	1.6239e-06	1.61406e-06	1.61849e-06	1.51913e-06	1.64466e-06	1.63886e-06	1.68771e-06
1494.2	7.88776	3.34185e-06	2.73908e-06	2.72798e-06	2.70527e-06	2.66956e-06	2.60973e-06	2.57636e-06	2.54289e-06	2.39623e-06	2.35495e-06	2.2325e-06	2.09295e-06	1.94459e-06	1.75105e-06	1.63172e-06	1.01658e-06	6.81663e-07
1502.64	7.89137	5.05964e-07	4.78225e-07	4.82895e-07	4.70026e-07	5.04474e-07	4.51439e-07	4.60668e-07	4.56376e-07	4.45635e-07	4.43329e-07	4.78036e-07	4.50532e-07	5.01765e-07	5.2315e-07	4.91585e-07	4.81318e-07	5.20528e-07
1511.09	7.89498	5.22935e-08	1.99888e-08	-7.79738e-25	2.80763e-09	1.40133e-08	0	2.30667e-08	1.42884e-08	1.15774e-08	9.86582e-09	1.27263e-08	1.8135e-08	1.36408e-08	0	4.00618e-08	0	1.99502e-09
1519.54	7.89859	1.4604e-07	5.05287e-08	1.47734e-07	1.13049e-07	7.30863e-08	1.10654e-07	8.98131e-08	1.11426e-07	1.01198e-07	6.64704e-08	1.16009e-07	7.16561e-08	8.8269e-08	3.1671e-08	1.10555e-07	4.28312e-08	8.55389e-08
1527.99	7.90221	6.69821e-06	5.63904e-06	5.52773e-06	5.51429e-06	5.47081e-06	5.35461e-06	5.24763e-06	5.1483e-06	4.88129e-06	4.6854e-06	4.57291e-06	4.46294e-06	4.11261e-06	4.19786e-06	3.86858e-06	1.40903e-06	1.1015e-06
1536.43	7.90582	3.91888e-05	3.5398e-05	3.52331e-05	3.50212e-05	3.48461e-05	3.46615e-05	3.44758e-05	3.41771e-05	3.38988e-05	3.36678e-05	3.32861e-05	3.31861e-05	3.20567e-05	3.0734e-05	2.95746e-05	2.52214e-05	2.57215e-05
1544.88	7.90943	1.37658e-05	1.20714e-05	1.20106e-05	1.19647e-05	1.18741e-05	1.18542e-05	1.17662e-05	1.1679e-05	1.15737e-05	1.14524e-05	1.12465e-05	1.1073e-05	1.07079e-05	1.02482e-05	1.02339e-05	8.4189e-06	8.00683e-06
1553.33	6.6598	2.37783e-07	2.12436e-07	1.77692e-07	2.48865e-07	2.14738e-07	1.74048e-07	2.46135e-07	2.45112e-07	2.13099e-07	2.4209e-07	1.69382e-07	1.84833e-07	1.7007e-07	2.17222e-07	1.83073e-08	1.20871e-07	1.49559e-07
1560.93	8.4042	3.91566e-07	3.61936e-07	2.86911e-07	3.26579e-07	3.22783e-07	3.64949e-07	3.27517e-07	3.72261e-07	3.29647e-07	3.22138e-07	3.08269e-07	3.5161e-07	3.35754e-07	3.99194e-07	2.89899e-07	2.07066e-07	2.46579e-07
1569.23	7.8809	0.0001336	0.000129664	0.00012891	0.000128188	0.000127501	0.000126666	0.00012604	0.00012452	0.000123391	0.000122231	0.000120203	0.000118258	0.000114781	0.00010959	0.000102322	9.03551e-05	8.64824e-05
1577.61	7.45885	0.000178064	0.000179663	0.000178632	0.000177736	0.000176798	0.000175867	0.000174978	0.000173165	0.000171487	0.000170032	0.000167283	0.000165059	0.000161011	0.000155115	0.000146687	0.000128827	0.000118025
1586.31	7.4983	2.16186e-05	1.90063e-05	1.88452e-05	1.86887e-05	1.85159e-05	1.84651e-05	1.83215e-05	1.80724e-05	1.78644e-05	1.76888e-05	1.72833e-05	1.68762e-05	1.61585e-05	1.52428e-05	1.44864e-05	1.1366e-05	1.13479e-05
1594.96	7.7622	8.40828e-06	7.0105e-06	6.9665e-06	7.00644e-06	6.95977e-06	6.93052e-06	6.87191e-06	6.90303e-06	6.89404e-06	6.86441e-06	6.89415e-06	7.08714e-06	6.79693e-06	6.37497e-06	5.36689e-06	3.38123e-06	3.4986e-06
1603.38	7.93471	0.000203488	0.000210462	0.000209332	0.000208184	0.00020717	0.000206123	0.000205098	0.000203009	0.00020108	0.000199388	0.000195963	0.000193132	0.000187862	0.000179629	0.000167766	0.000145538	0.000133552
1611.79	7.93832	0.000134175	0.000134949	0.000134168	0.000133372	0.000132509	0.000131962	0.000131093	0.000129761	0.00012836	0.000127319	0.000124858	0.000122904	0.000119338	0.000113959	0.000107028	9.14287e-05	8.61085e-05
1620.21	7.94194	1.46159e-05	1.1788e-05	1.16364e-05	1.15947e-05	1.15021e-05	1.13986e-05	1.119e-05	1.09993e-05	1.07386e-05	1.06187e-05	1.01043e-05	9.79835e-06	9.27919e-06	8.81057e-06	8.6149e-06	7.72198e-06	7.89754e-06
1628.63	7.94555	4.07105e-06	3.57688e-06	3.5639e-06	3.43457e-06	3.29896e-06	3.27919e-06	3.07348e-06	3.07809e-06	2.69941e-06	2.6162e-06	2.72634e-06	2.64747e-06	2.58405e-06	2.30224e-06	1.51598e-06	-3.93863e-07	-9.22677e-07
1637.05	7.94916	1.17653e-05	1.04199e-05	1.03389e-05	1.02397e-05	1.01831e-05	1.01138e-05	1.00536e-05	9.88347e-06	9.84354e-06	9.79422e-06	9.64883e-06	9.64041e-06	9.2703e-06	8.73944e-06	7.73705e-06	5.52805e-06	5.9131e-06
1645.47	7.95277	3.15928e-05	2.88372e-05	2.86901e-05	2.85529e-05	2.84209e-05	2.82893e-05	2.81935e-05	2.80172e-05	2.78865e-05	2.77393e-05	2.7624e-05	2.77126e-05	2.67697e-05	2.55968e-05	2.44567e-05	2.11574e-05	2.34701e-05
1653.89	7.95638	1.39854e-05	1.22741e-05	1.21391e-05	1.20821e-05	1.2038e-05	1.19385e-05	1.19791e-05	1.18489e-05	1.1737e-05	1.1669e-05	1.15844e-05	1.16542e-05	1.13167e-05	1.08148e-05	1.10305e-05	9.78666e-06	1.16117e-05
1662.31	7.95999	2.57221e-06	2.26639e-06	2.156e-06	2.17606e-06	2.04283e-06	2.04391e-06	2.03919e-06	1.95624e-06	1.87944e-06	1.93357e-06	1.89305e-06	1.93965e-06	1.75617e-06	1.48341e-06	9.99837e-07	1.5644e-07	1.77454e-08
1670.73	7.96361	1.03007e-06	8.40157e-07	8.60823e-07	8.42412e-07	8.29054e-07	8.60141e-07	8.49592e-07	8.16692e-07	8.05011e-07	7.86967e-07	8.05712e-07	7.73005e-07	7.18333e-07	6.8687e-07	6.94938e-07	5.77618e-07	7.0006e-07
1679.15	7.96722	2.3385e-07	2.1295e-07	2.59766e-07	2.08614e-07	1.47772e-07	2.44215e-07	2.43806e-07	2.77549e-07	1.94779e-07	2.11682e-07	1.32807e-07	1.9451e-07	1.97995e-07	1.26548e-07	1.66662e-07	1.58206e-07	1.64877e-07
1687.57	7.97083	1.52516e-07	1.2986e-07	8.66365e-08	7.58483e-08	8.48517e-08	5.40197e-08	1.35126e-07	8.45219e-08	7.99816e-08	7.50713e-08	1.59195e-07	7.06807e-08	5.55148e-08	7.23852e-08	7.14933e-08	7.1917e-08	1.02483e-07
1695.99	7.97444	1.49076e-08	1.7745e-08	0	4.03824e-09	2.54377e-08	0	4.13193e-24	6.68686e-09	1.58674e-08	1.73239e-08	0	1.59525e-08	4.19197e-24	1.88364e-08	9.73937e-09	1.59511e-10	2.63695e-08
1704.41	7.97805	1.10792e-08	2.25893e-24	2.62143e-08	1.59021e-08	0	2.98089e-08	3.53268e-08	1.20427e-08	0	1.06081e-08	0	6.07724e-08	0	-1.96747e-09	2.32942e-08	9.93542e-09	1.40437e-08
1712.83	7.98166	1.31901e-08	0	7.37114e-09	1.47065e-08	3.09662e-08	6.76661e-09	0	6.98535e-09	1.8444e-08	2.41228e-08	2.04392e-08	4.46203e-08	2.73193e-08	2.07525e-08	8.29072e-09	1.28136e-08	1.47998e-08
1721.25	7.98528	4.82671e-09	1.38613e-08	0	5.4737e-08	1.79998e-08	0	0	0	3.96335e-08	3.47203e-08	2.44756e-09	0	0	2.27691e-08	9.9728e-10	1.83712e-09	2.03365e-08
1729.67	7.98889	0	-4.81395e-09	-9.99686e-09	0	0	-1.85811e-24	3.48285e-09	1.15842e-08	-4.9648e-24	0	-3.8092e-09	1.42302e-08	0	0	3.13081e-09	-9.54818e-10	3.48676e-09
1738.08	7.9925	0	1.13653e-08	0	1.90217e-08	0	0	0	1.90842e-08	1.92521e-08	0	0	3.83229e-08	0	0	8.94335e-09	1.13076e-08	3.433e-08
1746.5	7.99611	0	0	0	0	0	0	0	0	0	0	0	0	0	-6.06533e-09	-3.96966e-09	-8.04819e-09	-8.37675e-09
1754.92	7.99972	2.89295e-07	3.02819e-07	1.79687e-07	2.45995e-07	2.40009e-07	2.73517e-07	2.49158e-07	2.39268e-07	2.45647e-07	2.03623e-07	2.08537e-07	2.50089e-07	1.57121e-07	1.86233e-07	2.40937e-07	2.05083e-07	2.81447e-07
1763.34	8.00333	1.65803e-07	2.2746e-07	1.59865e-07	1.93811e-07	1.34239e-07	2.12839e-07	1.64962e-07	1.34066e-07	1.9108e-07	1.3087e-07	7.02317e-08	1.09797e-07	1.51272e-07	1.22654e-07	1.37733e-07	1.12052e-07	1.5611e-07
1771.76	8.00695	4.10171e-08	5.30876e-08	6.01881e-08	4.3614e-08	9.19489e-08	7.19495e-09	2.92489e-08	4.0263e-08	2.89483e-08	6.55174e-08	1.70054e-08	5.38135e-08	2.75078e-08	8.79208e-08	3.55659e-08	3.42569e-08	-7.50103e-09
1780.18	8.01056	0	1.81197e-08	0	0	1.18385e-08	1.6048e-08	1.32609e-08	-2.62112e-09	4.09412e-10	4.96653e-08	2.68539e-09	4.49807e-09	0	0	1.07313e-08	3.4689e-09	-4.25261e-09
1788.6	8.01417	3.73155e-07	1.58003e-07	2.0392e-07	1.71066e-07	1.31035e-07	1.55262e-07	2.8391e-07	2.64506e-07	1.47426e-07	2.41085e-07	1.87255e-07	1.62616e-07	3.50531e-07	1.18852e-07	2.07901e-07	2.7091e-07	2.79072e-07
1797.02	8.01778	8.5455e-08	7.28547e-08	1.03082e-07	8.39665e-08	9.75365e-08	1.5767e-07	8.9556e-08	1.1611e-07	9.2751e-08	9.871e-08	5.35008e-08	1.34783e-07	9.51484e-08	1.15706e-07	1.6603e-07	2.02375e-07	2.10523e-07
1805.44	8.02139	1.29471e-07	8.97519e-09	6.41953e-08	2.01773e-08	1.17002e-08	1.04595e-07	5.35228e-08	1.09179e-07	6.33256e-09	1.16172e-08	1.26379e-08	5.13416e-08	1.19104e-08	1.95127e-08	4.00751e-08	3.6699e-08	4.35924e-08
1813.86	8.025	1.29436e-08	5.51439e-08	3.12716e-09	4.33646e-09	4.95246e-09	3.00835e-08	2.79451e-08	1.03371e-09	-2.195e-09	-8.54657e-10	9.76341e-09	3.25196e-08	-8.62503e-10	1.81662e-08	2.04519e-08	1.16491e-08	-1.05065e-08
1822.28	8.02862	-1.18844e-08	-4.79876e-08	-5.01067e-08	-3.59884e-08	-5.09525e-08	-4.58533e-08	-3.37269e-08	-4.77114e-08	-5.44613e-08	-4.15353e-08	-3.24365e-08	-4.83214e-08	-4.71341e-08	-6.27799e-08	-6.89569e-08	-1.38705e-07	-9.49116e-08
1830.7	8.03223	7.08905e-08	1.38426e-07	1.33417e-07	1.3881e-07	1.33816e-07	1.39255e-07	1.34274e-07	1.04413e-07	1.19044e-07	1.4135e-07	1.3075e-07	1.45137e-07	1.42288e-07	1.67029e-07	1.28726e-07	1.45614e-07	1.44206e-07
1839.12	8.03584	-1.52438e-08	-1.56335e-08	-1.56344e-08	-1.56354e-08	-1.56365e-08	-1.5638e-08	-1.56394e-08	-1.56432e-08	-1.56479e-08	-1.93706e-08	-1.9392e-08	-1.94257e-08	-1.57405e-08	-1.58417e-08	-1.61747e-08	-1.68663e-08	-1.75939e-08
1847.54	8.03945	-3.45686e-08	-5.52221e-08	-5.52935e-08	-5.53691e-08	-5.54499e-08	-5.87456e-08	-5.88422e-08	-5.76706e-08	-5.79027e-08	-5.81633e-08	-5.87821e-08	-5.95515e-08	-5.85793e-08	-6.03868e-08	-6.48434e-08	-7.16435e-08	-3.48939e-08
1855.96	8.04306	-7.38248e-08	-8.84169e-08	-9.04217e-08	-9.04714e-08	-9.05253e-08	-9.0584e-08	-9.06478e-08	-9.0792e-08	-9.09609e-08	-5.3018e-08	-9.16558e-08	-9.23217e-08	-5.98334e-08	-9.50788e-08	-1.00095e-07	-1.08602e-07	-1.1688e-07
1864.38	8.04667	6.94307e-08	1.47077e-07	1.35317e-07	1.3561e-07	1.5653e-07	1.17234e-07	2.2631e-07	1.54313e-07	1.20079e-07	1.39196e-07	1.69922e-07	1.8959e-07	1.93196e-07	1.90038e-07	1.89831e-07	2.11253e-07	1.91957e-07
1872.79	8.05029	1.95489e-05	1.95135e-05	1.95233e-05	1.95757e-05	1.96754e-05	1.96112e-05	1.94781e-05	1.95653e-05	1.9656e-05	1.95437e-05	1.95832e-05	1.95081e-05	1.95615e-05	1.95801e-05	1.96795e-05	1.9936e-05	2.0155e-05
1881.21	8.0539	5.91818e-05	4.52313e-05	4.51594e-05	4.50731e-05	4.49979e-05	4.48677e-05	4.48877e-05	4.46719e-05	4.4482e-05	4.42824e-05	4.39285e-05	4.34086e-05	4.29163e-05	4.20503e-05	4.04544e-05	3.8512e-05	3.70577e-05
1889.63	8.05751	1.61657e-05	1.59389e-05	1.59573e-05	1.59319e-05	1.59285e-05	1.59046e-05	1.59447e-05	1.59031e-05	1.59631e-05	1.59683e-05	1.59521e-05	1.60584e-05	1.61179e-05	1.62706e-05	1.68113e-05	1.78366e-05	1.90002e-05
1898.05	8.06112	4.15553e-06	5.48507e-06	5.46469e-06	5.49747e-06	5.49945e-06	5.52288e-06	5.49257e-06	5.54393e-06	5.5626e-06	5.5811e-06	5.59695e-06	5.71916e-06	5.80265e-06	5.90783e-06	6.45775e-06	7.28221e-06	8.00485e-06
1906.47	8.06473	3.23687e-06	5.00462e-06	4.94231e-06	5.05873e-06	4.96652e-06	4.97211e-06	5.00645e-06	5.03248e-06	5.12189e-06	5.06118e-06	5.11998e-06	5.22216e-06	5.30286e-06	5.50018e-06	5.94759e-06	6.6156e-06	7.2487e-06
1914.89	8.06834	5.87474e-07	7.61781e-07	7.65759e-07	8.0163e-07	7.18796e-07	8.59964e-07	7.85023e-07	8.02459e-07	8.0775e-07	8.22934e-07	8.24708e-07	7.93287e-07	7.85375e-07	8.61708e-07	8.9287e-07	9.34564e-07	1.06249e-06
1923.31	8.07196	5.12376e-07	6.3713e-07	6.21752e-07	5.8795e-07	6.28551e-07	6.116e-07	6.36537e-07	6.85418e-07	6.97686e-07	6.3738e-07	6.12615e-07	6.15278e-07	6.47608e-07	7.06746e-07	7.33916e-07	7.74422e-07	9.56901e-07
1931.73	8.07557	2.63718e-06	1.78561e-06	1.67693e-06	1.74853e-06	1.72274e-06	1.70933e-06	1.70346e-06	1.73353e-06	1.70524e-06	1.67853e-06	1.70805e-06	1.67476e-06	1.64331e-06	1.69858e-06	1.71776e-06	1.9003e-06	1.95808e-06
1940.15	8.07918	0.000143212	9.048e-05	8.96859e-05	8.89027e-05	8.80359e-05	8.72031e-05	8.64476e-05	8.47919e-05	8.3269e-05	8.16898e-05	7.84873e-05	7.54908e-05	7.23823e-05	6.77754e-05	6.04753e-05	5.40233e-05	4.89825e-05
1948.57	8.08279	0.00072077	0.000568616	0.000565128	0.000561572	0.000558006	0.000554387	0.000550753	0.000543515	0.000536157	0.000528753	0.000513729	0.000498379	0.000482438	0.000456882	0.000408395	0.000356983	0.000306992
1956.99	8.0864	0.00153911	0.00119577	0.00118981	0.00118367	0.00117752	0.00117131	0.00116498	0.00115225	0.00113924	0.00112587	0.00109843	0.00106964	0.00103893	0.000988763	0.000889785	0.000780684	0.000681683
1965.41	8.09001	0.00114688	0.000947398	0.000942188	0.000936901	0.000931874	0.000926571	0.000921322	0.000910873	0.000900457	0.000889923	0.000868545	0.000846657	0.000823879	0.000787675	0.000718342	0.000644921	0.000572198
1973.83	8.09363	0.000355289	0.000326491	0.00032467	0.000322899	0.000321075	0.000319362	0.000317471	0.000313977	0.000310487	0.000306814	0.000299479	0.000292181	0.000283758	0.000270212	0.000243304	0.000212764	0.000181516
1982.25	8.09724	6.3017e-05	5.44515e-05	5.40394e-05	5.37435e-05	5.36373e-05	5.31629e-05	5.30629e-05	5.20878e-05	5.17669e-05	5.153e-05	5.04526e-05	4.9809e-05	4.86906e-05	4.6717e-05	4.43003e-05	3.75281e-05	3.69221e-05
1990.67	8.10085	5.34382e-05	4.78212e-05	4.76992e-05	4.74332e-05	4.72794e-05	4.72122e-05	4.7052e-05	4.69015e-05	4.67766e-05	4.67442e-05	4.71495e-05	4.75547e-05	4.6556e-05	4.53613e-05	4.47378e-05	4.19192e-05	4.61747e-05
1999.09	8.10446	0.0012357	0.00107131	0.00106691	0.00106251	0.00105807	0.00105355	0.00104896	0.00103969	0.00103027	0.00102064	0.00100063	0.000979567	0.000957932	0.000922095	0.00084716	0.000765615	0.00068216
2007.5	8.10807	0.00277507	0.00221937	0.00220709	0.00219478	0.00218223	0.00216955	0.00215676	0.00213081	0.00210415	0.00207685	0.00202021	0.00195986	0.00190078	0.00180309	0.00160476	0.00139819	0.0012036
2015.92	8.11168	0.00275613	0.00209322	0.00207987	0.00206632	0.00205276	0.00203914	0.00202541	0.00199777	0.00196978	0.0019412	0.00188283	0.00182204	0.00176206	0.00166496	0.00147401	0.00128052	0.00109626
2024.34	8.1153	0.000830317	0.000717023	0.000712818	0.000708762	0.000704497	0.00070035	0.000696172	0.000687709	0.000679328	0.000670933	0.000653685	0.000636005	0.000618858	0.000591191	0.000536566	0.000479157	0.00041848
2032.76	8.11891	0.000301009	0.000266666	0.000264855	0.000263081	0.000261436	0.000259794	0.000258145	0.000255091	0.000252107	0.000249417	0.000244553	0.000240323	0.0002326	0.000222126	0.000206017	0.000174778	0.000170572
2041.18	8.12252	0.000308151	0.000293622	0.000292499	0.000290955	0.000289685	0.00028828	0.000287127	0.000284343	0.000281993	0.000279875	0.00027599	0.000273884	0.000267948	0.000258568	0.000242476	0.000210616	0.00019868
2049.6	8.12613	0.000730205	0.000684142	0.000680744	0.000676911	0.000673362	0.000669841	0.000666188	0.000658712	0.000650776	0.000642711	0.000626438	0.00060894	0.000593469	0.000567715	0.000513498	0.000457449	0.000397309
2058.02	8.12974	0.000823537	0.000745762	0.000741824	0.000738142	0.000734397	0.000730745	0.000726783	0.000719112	0.000711633	0.000703488	0.000687515	0.000670649	0.000654512	0.00062816	0.000574162	0.000518171	0.000459872
2066.44	8.13335	0.000906975	0.000792878	0.000788377	0.000784111	0.000779566	0.000775135	0.000770686	0.000761787	0.000752735	0.000743556	0.000724711	0.000705234	0.000687571	0.000659099	0.000602655	0.0005458	0.000487838
2074.86	8.13697	0.000591332	0.000553145	0.000550011	0.000547061	0.000543773	0.000541012	0.000537951	0.0005318	0.000525666	0.000519556	0.000507076	0.000494475	0.000481537	0.000461152	0.000419339	0.000368267	0.000318397
2083.28	8.14058	0.000315194	0.000285465	0.000283638	0.000281879	0.000280167	0.000278441	0.000276648	0.000273315	0.000270278	0.000267351	0.000262253	0.000258415	0.000250348	0.000238645	0.000220652	0.000185617	0.00017646
2091.7	8.14419	0.000187899	0.000165932	0.00016477	0.000163557	0.00016242	0.000161351	0.000160221	0.000158008	0.000156104	0.000154197	0.000151124	0.000148895	0.000143461	0.000136043	0.000127497	0.00010032	0.000102171
2100.12	8.1478	6.55669e-05	5.84303e-05	5.79155e-05	5.77272e-05	5.73203e-05	5.70456e-05	5.67125e-05	5.60725e-05	5.60928e-05	5.59109e-05	5.62391e-05	5.63423e-05	5.44757e-05	5.25181e-05	4.95355e-05	3.44464e-05	4.5974e-05
2108.54	8.4804	2.6525e-05	2.33731e-05	2.31986e-05	2.31205e-05	2.30352e-05	2.30034e-05	2.28312e-05	2.28823e-05	2.28821e-05	2.26883e-05	2.29172e-05	2.32606e-05	2.2996e-05	2.22808e-05	1.73369e-05	1.12381e-05	2.3609e-05
2116.97	8.023	1.85447e-05	1.53571e-05	1.54248e-05	1.48064e-05	1.47151e-05	1.41837e-05	1.40784e-05	1.39836e-05	1.34745e-05	1.28055e-05	1.21673e-05	1.20628e-05	1.06798e-05	9.04324e-06	6.21881e-06	-3.5932e-06	-6.66095e-06
2125.41	8.476	2.97238e-06	2.71649e-06	2.48617e-06	2.49691e-06	2.40728e-06	2.255e-06	2.1693e-06	2.15181e-06	2.06399e-06	2.0869e-06	1.9366e-06	1.89416e-06	1.7183e-06	1.45572e-06	1.52778e-06	-4.32209e-07	-7.75409e-07
2134.3	8.38695	1.73662e-06	1.56105e-06	1.42176e-06	1.48142e-06	1.44115e-06	1.4247e-06	1.44847e-06	1.34539e-06	1.32897e-06	1.31698e-06	1.31077e-06	1.33483e-06	1.24406e-06	1.14384e-06	1.14108e-06	1.56418e-07	9.72874e-07
2142.31	8.12115	2.66705e-06	2.19835e-06	2.40705e-06	2.05005e-06	2.20787e-06	2.02181e-06	2.186e-06	1.97688e-06	1.64375e-06	1.66149e-06	1.01877e-06	1.04142e-06	6.96824e-07	5.55321e-07	9.28949e-07	-2.89393e-06	-4.84579e-06
2150.88	8.16947	1.93323e-05	1.70348e-05	1.66548e-05	1.66295e-05	1.64857e-05	1.62193e-05	1.60562e-05	1.58164e-05	1.54735e-05	1.51856e-05	1.4636e-05	1.41774e-05	1.45314e-05	1.56632e-05	2.06543e-05	1.66917e-05	2.04453e-05
2159.31	8.17308	1.24234e-05	1.0618e-05	1.04228e-05	1.02708e-05	1.03502e-05	1.00624e-05	9.65465e-06	9.41471e-06	9.06215e-06	8.92544e-06	8.38759e-06	7.97423e-06	7.19465e-06	6.03064e-06	4.03752e-06	4.88358e-06	1.32293e-05
2167.73	8.1767	8.93817e-06	8.19574e-06	8.06879e-06	8.11411e-06	7.65626e-06	7.71085e-06	7.70804e-06	7.20847e-06	7.33344e-06	7.14027e-06	6.98312e-06	7.04233e-06	6.56868e-06	5.84795e-06	4.51912e-06	1.29057e-06	3.51239e-06
2176.16	8.18031	2.43846e-06	1.80154e-06	1.90368e-06	1.93916e-06	1.96726e-06	1.86135e-06	2.00482e-06	2.17291e-06	2.12048e-06	2.15126e-06	2.17933e-06	2.19801e-06	1.99174e-06	1.27172e-06	6.48899e-07	-3.41628e-07	-1.27318e-06
2184.59	8.18392	6.39507e-07	6.21402e-07	5.45726e-07	6.7841e-07	3.95001e-07	5.94331e-07	4.80053e-07	6.73861e-07	6.05943e-07	4.92741e-07	5.27718e-07	5.58373e-07	5.5946e-07	5.48815e-07	5.37821e-07	4.11046e-07	6.0672e-07
2193.01	8.18753	7.52299e-07	5.04972e-07	6.65791e-07	6.73999e-07	5.71879e-07	5.35347e-07	5.07408e-07	5.53366e-07	5.67911e-07	5.50898e-07	5.80465e-07	5.75996e-07	5.7677e-07	5.30373e-07	5.6029e-07	4.73671e-07	6.05318e-07
2201.44	8.19114	1.64581e-07	1.24585e-07	1.40953e-07	1.65533e-07	4.52393e-08	1.71298e-07	9.18169e-08	2.60123e-08	1.44188e-07	7.08176e-08	8.73236e-08	6.38916e-08	7.8705e-08	3.78445e-08	9.33409e-08	1.02145e-07	1.1146e-07
2209.87	8.19475	3.02423e-07	2.04543e-07	3.14218e-07	2.36414e-07	1.79436e-07	2.41453e-07	1.87541e-07	2.20367e-07	2.04973e-07	2.48216e-07	2.4372e-07	2.67639e-07	2.34878e-07	1.99868e-07	2.31924e-07	1.18888e-07	2.71469e-07
2218.3	8.19837	1.86665e-07	3.61954e-08	9.18836e-08	2.37939e-07	9.63184e-08	2.048e-07	1.25194e-07	1.79852e-07	2.46163e-07	1.46538e-07	1.44331e-07	1.5023e-07	1.7251e-07	1.4899e-07	1.69034e-07	1.15157e-07	3.05713e-07
2226.72	8.20198	6.7409e-08	1.05785e-07	3.20444e-07	1.10378e-07	1.91441e-07	2.91577e-07	1.3262e-07	1.03129e-07	2.87918e-07	1.46324e-07	1.5361e-07	1.21489e-07	1.29207e-07	1.50958e-07	1.25325e-07	1.85556e-08	-8.82669e-09
2235.15	8.20559	1.83091e-08	4.70418e-08	0	1.22459e-07	6.15469e-08	3.81383e-08	4.33037e-09	2.10782e-08	2.83166e-08	6.18091e-08	4.07682e-08	3.59039e-08	2.47061e-08	3.74779e-08	-6.21855e-10	6.04143e-08	4.88317e-08
2243.58	8.2092	1.45387e-08	6.89512e-08	1.33921e-07	7.86197e-08	5.97786e-09	9.41242e-08	2.11474e-08	1.66946e-08	2.85864e-08	3.39923e-08	3.29475e-08	2.37008e-08	5.48187e-08	5.26225e-08	5.00932e-08	1.6319e-08	5.81863e-24
2252.01	8.21281	1.38773e-07	2.00252e-07	1.47489e-07	1.90782e-07	2.34661e-07	1.27853e-07	2.24921e-07	1.71052e-07	1.64938e-07	1.66594e-07	1.51049e-07	1.6475e-07	1.43525e-07	1.44778e-07	1.31475e-07	3.02903e-07	1.19151e-07
2260.43	8.21642	1.07714e-07	1.20364e-07	1.04029e-07	1.93477e-07	1.13847e-07	1.8445e-07	3.17797e-07	1.00251e-07	9.98102e-08	1.00338e-07	1.15018e-07	9.46618e-08	9.98519e-08	1.37256e-07	8.53312e-08	1.08295e-07	7.98352e-08
2268.86	8.22004	3.37793e-08	-3.15057e-08	6.5567e-08	6.9191e-09	0	2.83103e-09	1.36204e-08	2.20799e-08	1.59093e-08	2.37637e-08	5.40466e-24	7.05762e-09	4.42105e-08	-1.90762e-24	0	8.17179e-08	1.06163e-08
2277.29	8.22365	1.10485e-23	3.75743e-24	2.46441e-08	1.01816e-07	3.15603e-08	3.21091e-08	2.01397e-08	6.83055e-08	6.29906e-08	3.41747e-08	6.58102e-08	4.74881e-08	6.60771e-08	6.2642e-08	3.31804e-08	1.30446e-07	3.05768e-08
2285.71	8.22726	0	1.67293e-24	1.66458e-08	1.58561e-09	1.77429e-24	1.13715e-08	7.49149e-09	7.28645e-09	1.10746e-08	1.04437e-08	2.89673e-08	1.08216e-08	2.98113e-08	-4.42547e-10	-4.76474e-09	2.42238e-08	-4.49168e-08
2294.14	8.23087	0	0	1.34189e-08	1.08782e-08	1.15342e-08	0	0	1.4572e-08	0	6.24945e-09	1.89199e-08	0	6.27018e-09	5.82783e-08	6.19153e-08	4.43505e-08	2.76613e-08
2302.57	8.23448	0	4.12522e-09	0	0	0	7.71953e-09	0	-1.56584e-09	6.02766e-09	6.992e-09	0	0	2.18381e-08	8.49802e-24	0	5.68862e-09	-2.53741e-08
2311	8.23809	0	0	0	5.69356e-08	0	0	4.33304e-08	5.26694e-09	1.20255e-08	4.57986e-09	5.85342e-09	0	0	-1.1401e-08	2.45584e-08	3.14934e-09	-1.87516e-09
2319.42	8.24171	0	0	-4.68343e-09	0	2.19828e-08	7.01359e-09	6.34794e-09	0	4.05523e-09	5.1015e-09	0	1.86708e-08	0	0	0	0	0
2327.85	8.24532	0	0	0	0	0	0	1.73511e-24	5.75986e-09	0	0	0	-8.67806e-09	0	0	0	0	1.23951e-08
2336.28	8.24893	0	0	0	-5.07808e-09	0	0	4.30038e-24	0	-6.57906e-09	-3.50419e-09	0	0	0	-1.32656e-08	0	0	1.35137e-08
2344.71	8.25254	0	0	4.11649e-09	-1.42229e-08	1.92482e-09	2.75652e-08	1.6152e-24	1.49127e-08	0	1.79315e-08	1.58461e-08	0	0	-2.05531e-08	0	0	1.08797e-08
2353.13	8.25615	0	0	8.24536e-09	5.65159e-09	1.44493e-08	4.10943e-09	0	0	1.58576e-09	-4.51967e-09	0	0	0	3.87057e-08	0	0	1.16564e-24
2361.56	8.25976	0	0	0	0	0	0	0	1.70365e-09	1.94607e-24	0	0	0	-1.55029e-08	0	0	6.9896e-08	-3.25798e-09
2369.99	8.26338	0	-3.81855e-09	9.00784e-09	3.50242e-09	0	0	0	0	0	-5.36023e-25	-2.42245e-08	0	4.83249e-08	0	0	0	5.41027e-11
2378.41	8.26699	0	-1.18246e-08	1.66485e-08	-1.06178e-08	0	0	0	1.68706e-08	0	1.24929e-08	0	0	7.66757e-24	0	3.45059e-08	0	4.54106e-09
2386.84	8.2706	0	0	0	5.03281e-09	0	1.82096e-08	-7.38798e-09	0	0	0	-3.94392e-24	1.13683e-08	2.32283e-09	0	0	0	-1.247e-08
2395.27	8.27421	0	3.69078e-09	3.7939e-09	-7.90528e-09	0	0	-6.86617e-09	0	1.60321e-08	0	0	0	-2.20423e-08	2.71955e-08	-4.01561e-08	0	1.2249e-08
2403.7	8.27782	0	3.7477e-09	0	0	7.12412e-09	7.28673e-09	0	0	0	0	0	0	0	0	0	0	2.59757e-08
2412.12	8.28143	0	1.96339e-24	5.00894e-24	0	3.33696e-09	1.62965e-08	0	3.73232e-09	8.96413e-24	0	7.11632e-09	0	3.23507e-08	4.06811e-08	4.64186e-08	-2.22916e-08	-7.48294e-09
2420.55	8.28505	4.78952e-09	3.27422e-09	0	1.19295e-08	0	9.01504e-25	0	0	0	1.50007e-08	0	6.43647e-09	0	0	0	4.17779e-09	-5.17658e-09
2428.98	8.28866	0	0	6.28381e-09	1.07936e-08	0	3.24475e-09	0	6.25163e-09	5.3468e-09	1.41243e-08	0	0	1.19488e-08	1.84312e-08	0	0	-1.02167e-09
2437.41	8.29227	7.58313e-09	6.60761e-09	0	5.22998e-09	0	0	0	0	0	0	2.96932e-08	1.37928e-08	0	0	0	-1.25921e-08	-1.79463e-08
2445.83	8.29588	9.67436e-09	1.44037e-08	0	4.03182e-09	0	0	4.80255e-10	1.84439e-08	0	0	1.27981e-08	0	0	1.5281e-08	0	0	-1.17116e-08
2454.26	8.29949	0	4.59286e-08	1.17205e-08	0	2.22131e-08	9.62671e-09	0	5.80311e-09	0	0	0	3.75213e-08	0	0	9.80963e-08	0	3.55544e-08
2462.69	8.3031	0	1.3967e-08	1.45495e-08	0	1.26942e-08	7.82884e-09	1.97544e-08	2.68982e-08	7.08123e-09	2.93119e-08	0	2.83893e-08	1.76658e-08	4.06234e-08	3.74382e-08	8.6106e-09	2.85034e-08
2471.11	8.30672	4.45755e-09	1.3748e-07	5.79647e-08	2.55198e-08	4.35191e-08	1.10744e-07	1.08776e-07	1.51997e-07	4.60846e-08	9.16272e-08	8.33261e-08	1.06637e-07	5.59234e-08	3.82111e-08	6.5123e-09	2.45385e-08	5.04091e-08
2479.54	8.31033	5.73112e-07	4.21402e-07	4.21746e-07	4.20854e-07	3.9241e-07	3.87578e-07	4.03226e-07	3.9573e-07	3.70976e-07	4.04811e-07	3.84835e-07	3.52348e-07	3.52128e-07	3.27505e-07	3.14843e-07	3.52074e-07	3.66109e-07
2487.97	8.31394	5.14235e-06	4.97478e-06	4.96884e-06	4.92317e-06	4.93334e-06	4.93008e-06	4.97414e-06	4.93013e-06	4.98176e-06	5.04101e-06	5.06277e-06	5.11352e-06	5.19912e-06	5.33156e-06	5.9295e-06	7.47662e-06	9.43254e-06
2496.4	8.31755	1.73019e-06	1.58018e-06	1.62238e-06	1.57351e-06	1.57256e-06	1.54302e-06	1.53026e-06	1.5649e-06	1.55775e-06	1.52991e-06	1.55812e-06	1.45811e-06	1.47842e-06	1.45479e-06	1.59199e-06	1.58683e-06	1.68965e-06
2504.82	8.32116	1.2921e-06	1.04773e-06	1.07292e-06	1.05586e-06	1.09498e-06	1.11459e-06	1.09379e-06	1.0391e-06	1.0609e-06	1.06556e-06	1.01355e-06	1.00942e-06	9.46399e-07	1.01282e-06	8.33353e-07	1.07098e-06	1.14771e-06
2513.25	8.32477	1.72152e-06	1.32456e-06	1.3188e-06	1.29488e-06	1.32497e-06	1.23257e-06	1.33138e-06	1.18554e-06	1.32945e-06	1.27618e-06	1.23628e-06	1.32068e-06	1.25528e-06	1.11619e-06	1.20679e-06	1.22714e-06	1.3448e-06

## Sheet: k_EMIT
Wavelength	FWHM	k_Summer_L	k_Summer_M	k_Summer_H	k_Winter_L	k_Winter_M	k_Winter_H	k_1976_L	k_1976_M	k_1976_H
1006.83	8.529	0	0	0	0	0	0	0	0	0	0	0	0	0	0	0	0	0
1014.29	8.53	0	0	0	0	0	0	0	0	0	0	0	0	0	0	0	0	0
1021.76	8.531	0	0	0	0	0	0	0	0	0	0	0	0	0	0	0	0	0
1029.22	8.533	0	0	0	0	0	0	0	0	0	0	0	0	0	0	0	0	0
1036.68	8.534	5.3179e-07	4.54976e-07	4.51032e-07	4.48958e-07	4.50452e-07	4.38522e-07	4.44571e-07	4.50528e-07	4.26619e-07	4.30925e-07	4.19748e-07	4.16665e-07	4.1353e-07	3.81958e-07	3.80961e-07	3.35254e-07	3.66554e-07
1044.14	8.536	1.23505e-07	9.78111e-08	9.94393e-08	1.02974e-07	1.0575e-07	1.01296e-07	9.03508e-08	1.00999e-07	9.48644e-08	9.73212e-08	8.84564e-08	1.00834e-07	8.67065e-08	8.93151e-08	9.17962e-08	6.04403e-08	8.28876e-08
1051.6	8.537	1.45612e-06	1.12929e-06	1.13574e-06	1.11634e-06	1.10413e-06	1.08697e-06	1.05829e-06	1.02053e-06	9.19845e-07	8.75254e-07	7.23407e-07	6.43771e-07	5.1643e-07	3.24092e-07	-1.68052e-08	-3.69525e-07	-6.18685e-07
1059.06	8.538	1.15991e-07	9.29828e-08	8.82404e-08	1.01624e-07	8.93944e-08	9.5806e-08	8.57954e-08	9.81957e-08	9.99738e-08	9.89631e-08	8.35197e-08	8.79544e-08	9.53266e-08	1.00574e-07	7.01176e-08	8.95624e-08	6.47486e-08
1066.52	8.54	2.98462e-07	2.46985e-07	2.4178e-07	2.37975e-07	2.31673e-07	2.37335e-07	2.39196e-07	2.41974e-07	2.29706e-07	2.30845e-07	2.21689e-07	2.47726e-07	2.20829e-07	2.19822e-07	1.9442e-07	1.93617e-07	1.96775e-07
1073.98	8.541	3.45777e-08	4.27449e-08	4.17471e-08	4.13181e-08	3.50126e-08	2.43784e-08	3.2998e-08	3.87619e-08	3.36039e-08	2.92355e-08	2.06422e-08	2.26493e-08	4.95657e-08	3.12603e-08	3.31418e-08	1.43298e-08	1.14653e-08
1081.44	8.543	2.47236e-09	1.33569e-09	3.71531e-11	-1.10938e-09	1.57158e-09	1.80115e-09	-8.08129e-10	1.20432e-09	5.93005e-09	1.87846e-09	7.57617e-25	1.52022e-09	4.37045e-09	6.26937e-09	6.01656e-09	-3.12378e-09	1.47211e-09
1088.9	8.544	0	1.33101e-09	-1.1186e-09	-6.99841e-10	-5.19696e-10	-1.89563e-10	7.63752e-10	0	6.70239e-09	-8.34829e-25	1.13699e-09	1.06045e-09	1.29206e-09	0	1.07383e-09	0	0
1096.36	8.545	0	-4.29659e-09	-5.48201e-10	-9.41614e-10	-3.22525e-10	2.87837e-11	2.5273e-09	-1.45528e-09	0	7.49974e-25	-6.68859e-10	1.09033e-09	-3.35289e-09	-1.01867e-09	-2.20299e-09	-5.77126e-09	-8.0472e-09
1103.82	8.547	0	0	1.82296e-09	0	0	1.65062e-09	0	0	0	0	-8.97452e-10	0	0	0	0	0	0
1111.28	8.548	0	2.15783e-10	1.95031e-09	0	0	3.11884e-09	0	1.23501e-09	9.4469e-10	0	4.17271e-09	3.92201e-10	0	0	5.88368e-09	-3.69036e-25	3.5267e-09
1118.74	8.55	0	0	-1.05827e-09	3.82572e-09	0	0	-4.92706e-09	4.08749e-09	-1.09961e-09	0	0	0	-1.55955e-09	-8.67705e-10	-6.76567e-09	4.82317e-09	-3.28807e-09
1126.2	8.551	0	0	0	1.99935e-09	1.4078e-09	0	0	0	3.69803e-09	0	0	4.35688e-09	0	0	0	0	0
1133.66	8.552	0	5.35056e-09	-3.46954e-09	6.89402e-09	3.00476e-09	5.61331e-10	0	1.94893e-09	2.97581e-09	3.05229e-09	4.32182e-09	1.52315e-09	-7.43444e-09	0	0	0	5.18279e-10
1141.11	8.554	0	0	0	0	0	0	0	0	0	-1.25969e-09	0	0	0	0	0	0	0
1148.57	8.555	0	0	-1.26136e-24	0	0	2.94552e-09	0	0	0	0	0	0	2.78326e-09	0	0	-8.91606e-09	-1.5549e-08
1156.03	8.557	0	0	0	-2.63955e-09	0	0	0	0	0	0	0	0	0	0	0	0	0
1163.49	8.558	0	0	0	0	0	0	0	0	0	0	0	0	0	0	0	0	0
1170.95	8.559	0	0	0	3.14809e-09	0	0	0	0	0	0	0	0	0	0	0	0	0
1178.4	8.561	0	0	0	0	0	0	0	0	0	0	0	0	0	0	0	0	0
1185.86	8.562	0	0	0	0	0	0	0	0	0	0	0	0	0	0	0	0	0
1193.32	8.564	-2.75961e-09	0	0	0	0	0	2.97802e-25	-2.18973e-09	0	0	0	0	0	-5.43695e-09	0	-1.01886e-08	6.34743e-09
1200.78	8.565	1.44976e-05	1.28703e-05	1.28019e-05	1.27439e-05	1.26701e-05	1.26185e-05	1.25775e-05	1.24574e-05	1.23538e-05	1.22584e-05	1.20704e-05	1.1945e-05	1.16601e-05	1.12925e-05	1.0846e-05	1.00026e-05	9.77171e-06
1208.23	8.566	3.36444e-05	2.99931e-05	2.98138e-05	2.96657e-05	2.95404e-05	2.93899e-05	2.92564e-05	2.90012e-05	2.87639e-05	2.84882e-05	2.80494e-05	2.76845e-05	2.69814e-05	2.60174e-05	2.50468e-05	2.27642e-05	2.19864e-05
1215.69	8.568	1.32446e-05	1.13858e-05	1.13214e-05	1.12476e-05	1.11794e-05	1.11034e-05	1.10218e-05	1.08846e-05	1.07558e-05	1.06326e-05	1.04487e-05	1.02875e-05	1.00259e-05	9.66394e-06	9.35028e-06	8.11743e-06	7.77636e-06
1223.15	8.569	2.2601e-05	1.9889e-05	1.97949e-05	1.96858e-05	1.96009e-05	1.94891e-05	1.93994e-05	1.92169e-05	1.90445e-05	1.88908e-05	1.8607e-05	1.84375e-05	1.79341e-05	1.72793e-05	1.65471e-05	1.48427e-05	1.45887e-05
1230.6	8.571	2.66326e-06	2.18716e-06	2.17455e-06	2.16643e-06	2.13604e-06	2.11077e-06	2.09929e-06	2.04747e-06	1.98585e-06	1.97309e-06	1.90456e-06	1.85902e-06	1.81568e-06	1.72258e-06	1.67511e-06	1.35514e-06	1.33623e-06
1238.06	8.572	8.50035e-07	7.39012e-07	7.3954e-07	7.39341e-07	7.32732e-07	7.3426e-07	7.23359e-07	7.05463e-07	7.00439e-07	6.88376e-07	6.84733e-07	6.91525e-07	6.6952e-07	6.19171e-07	5.97128e-07	5.36361e-07	5.52443e-07
1245.52	8.573	6.04746e-08	5.0999e-08	4.7055e-08	4.92328e-08	5.1322e-08	3.89752e-08	3.48089e-08	3.28031e-08	4.11551e-08	3.83245e-08	5.32172e-08	6.38547e-08	5.70052e-08	3.60704e-08	6.80381e-08	4.96829e-08	5.25172e-08
1252.97	8.575	2.13307e-07	1.98481e-07	1.85862e-07	1.75547e-07	1.84575e-07	1.96979e-07	1.90972e-07	2.02256e-07	1.95401e-07	1.90158e-07	2.05979e-07	1.71202e-07	1.71447e-07	1.49424e-07	1.74587e-07	1.67323e-07	2.48209e-07
1260.43	8.576	2.27928e-07	2.09112e-07	1.91756e-07	1.9722e-07	1.84675e-07	1.93596e-07	1.94934e-07	1.96855e-07	1.83737e-07	1.65465e-07	1.87675e-07	1.71522e-07	1.53911e-07	1.63537e-07	2.02359e-07	1.82951e-07	1.95557e-07
1267.88	8.578	1.55564e-07	1.32012e-07	1.55499e-07	1.52684e-07	1.29603e-07	1.36211e-07	1.28725e-07	1.20694e-07	1.19223e-07	1.49046e-07	1.20726e-07	1.20836e-07	9.9241e-08	1.09397e-07	1.13463e-07	1.4311e-07	1.57052e-07
1275.34	8.579	7.69151e-09	0	6.15952e-09	2.06349e-09	0	2.04358e-09	3.34342e-09	0	0	0	0	3.34059e-09	-6.50406e-25	9.45685e-09	4.30304e-09	1.28459e-08	0
1282.79	8.58	4.77345e-08	3.79639e-08	3.18159e-08	4.00552e-08	3.9721e-08	2.42107e-08	2.32963e-08	2.82325e-08	1.93318e-08	3.59914e-08	4.22733e-08	4.05947e-08	1.64681e-08	1.18524e-08	2.24054e-08	2.4458e-08	2.31483e-08
1290.25	8.582	1.95986e-06	1.67625e-06	1.66465e-06	1.65945e-06	1.64282e-06	1.65382e-06	1.63466e-06	1.61191e-06	1.60908e-06	1.57367e-06	1.58765e-06	1.63456e-06	1.648e-06	1.61437e-06	1.52596e-06	7.6569e-07	-2.36088e-08
1297.71	8.583	1.05979e-06	7.59673e-07	7.53622e-07	7.36867e-07	7.28664e-07	7.33683e-07	7.56008e-07	7.43566e-07	7.87768e-07	7.84862e-07	7.66919e-07	7.53528e-07	6.49313e-07	4.73305e-07	-4.1933e-08	-5.77297e-07	-8.4869e-07
1305.16	8.585	1.80873e-08	2.18671e-08	7.81265e-09	1.08232e-08	5.78302e-09	8.95337e-09	1.2588e-08	1.29142e-08	1.47579e-08	6.65636e-09	1.60423e-08	1.06241e-08	0	1.1013e-08	3.14171e-24	1.26059e-08	1.90253e-08
1312.61	8.586	4.836e-06	4.25524e-06	4.22264e-06	4.19393e-06	4.1961e-06	4.21307e-06	4.15571e-06	4.1405e-06	4.08957e-06	4.06851e-06	4.01729e-06	3.97926e-06	3.86188e-06	3.65145e-06	3.52372e-06	3.68271e-06	4.04863e-06
1320.07	8.587	5.79346e-06	5.32162e-06	5.30532e-06	5.28719e-06	5.29085e-06	5.26243e-06	5.23375e-06	5.19489e-06	5.20043e-06	5.13104e-06	5.12659e-06	5.03892e-06	4.89269e-06	4.77652e-06	4.82289e-06	5.08582e-06	5.57294e-06
1327.52	8.589	1.67295e-07	1.38882e-07	1.52042e-07	1.52174e-07	1.3264e-07	1.30821e-07	1.32053e-07	1.24902e-07	1.45538e-07	1.4062e-07	1.17271e-07	1.44847e-07	1.31712e-07	1.11477e-07	1.46859e-07	1.55902e-07	1.07399e-07
1334.98	8.59	1.72849e-06	1.7734e-06	1.78486e-06	1.76304e-06	1.75464e-06	1.7735e-06	1.76759e-06	1.74646e-06	1.76259e-06	1.6844e-06	1.68529e-06	1.7397e-06	1.71095e-06	1.72678e-06	1.81406e-06	1.93902e-06	1.99213e-06
1342.43	8.592	3.26763e-06	2.9657e-06	2.94886e-06	2.95011e-06	2.97411e-06	2.94489e-06	2.93643e-06	2.93614e-06	2.90182e-06	2.88283e-06	2.83069e-06	2.81597e-06	2.7779e-06	2.81527e-06	2.8159e-06	2.7925e-06	2.813e-06
1349.88	8.593	5.89285e-07	4.16055e-07	4.12742e-07	4.93639e-07	4.63051e-07	4.15861e-07	4.10127e-07	5.26295e-07	4.08492e-07	4.2223e-07	4.1007e-07	3.88574e-07	3.57727e-07	4.98129e-07	5.30306e-07	4.95289e-07	4.8402e-07
1357.34	8.594	7.9302e-08	7.06891e-08	6.66921e-08	6.68375e-08	8.80345e-08	7.06533e-08	7.0634e-08	8.56721e-08	7.568e-08	6.26829e-08	7.16109e-08	7.08338e-08	6.69287e-08	6.39542e-08	7.14383e-08	7.95498e-08	7.27222e-08
1364.79	8.596	2.6529e-07	2.45573e-07	2.24086e-07	2.37922e-07	2.30701e-07	2.30859e-07	2.36266e-07	2.43112e-07	2.46618e-07	2.29439e-07	2.37526e-07	2.54979e-07	2.49955e-07	2.37361e-07	2.25905e-07	2.3885e-07	2.64987e-07
1372.24	8.597	7.12117e-07	7.70975e-07	7.56777e-07	8.13517e-07	8.49592e-07	8.42232e-07	7.67146e-07	7.90577e-07	8.85251e-07	7.95118e-07	7.90636e-07	8.01748e-07	8.54895e-07	7.58609e-07	8.32792e-07	8.62763e-07	9.1279e-07
1379.69	8.599	1.78745e-07	2.079e-07	2.30352e-07	2.19514e-07	2.06608e-07	2.75243e-07	2.2896e-07	2.44771e-07	2.67666e-07	2.08638e-07	2.0379e-07	2.97174e-07	2.38223e-07	1.99085e-07	2.26775e-07	2.35129e-07	2.69674e-07
1387.14	8.6	4.90412e-08	1.53315e-08	2.17124e-08	2.89243e-08	1.36295e-08	1.20539e-08	1.74729e-08	6.49969e-08	1.96653e-08	1.31356e-08	3.5341e-08	1.22528e-08	3.04284e-08	2.73085e-08	2.28111e-08	2.42152e-08	2.62398e-08
1394.59	8.601	-3.19327e-09	-6.53604e-09	3.8595e-09	-1.04641e-08	-2.36394e-09	3.14455e-09	-1.45739e-09	2.95252e-08	6.68835e-09	-4.58699e-09	1.76763e-08	1.52645e-09	-3.20943e-09	-8.65363e-09	3.2044e-09	2.09725e-09	-8.56423e-09
1402.04	8.603	-1.08871e-09	1.22925e-09	1.55557e-09	1.23926e-09	9.29806e-09	4.0314e-09	4.04964e-09	4.40084e-09	4.44504e-09	2.50321e-09	-4.93219e-09	2.04302e-09	-3.90428e-09	3.58745e-09	-5.93864e-10	1.46984e-09	-1.06113e-08
1409.49	8.604	0	9.46592e-10	1.38742e-10	1.84627e-08	2.99553e-09	0	1.64561e-09	3.94771e-09	-6.77444e-10	-3.99257e-09	1.46466e-09	-4.85207e-09	3.80736e-09	2.32563e-08	9.10471e-10	-1.26969e-09	0
1416.94	8.606	5.78101e-08	-9.48544e-10	-4.75758e-10	6.48274e-09	-2.95885e-09	-1.00064e-09	2.9866e-08	-1.63185e-09	-1.35187e-08	0	8.48883e-09	3.37418e-08	4.90632e-09	-5.14027e-09	6.39709e-10	9.91557e-09	-1.58303e-09
1424.39	8.607	3.92359e-08	1.62638e-08	1.74077e-08	2.02857e-08	4.8856e-08	4.35254e-08	5.34312e-08	1.1627e-08	9.04482e-09	5.71153e-08	3.18527e-08	7.29603e-08	1.03731e-08	2.60985e-08	4.3379e-08	3.91894e-08	3.84524e-08
1431.84	8.608	0.000206189	0.000192352	0.000191891	0.00019142	0.000190939	0.000190527	0.000190049	0.000189038	0.000187964	0.000186855	0.000184628	0.000182097	0.000179122	0.00017429	0.000164383	0.000152581	0.000140384
1439.29	8.61	0.000248893	0.000203958	0.000202931	0.000201902	0.000200867	0.000199858	0.000198784	0.000196697	0.000194597	0.000192458	0.00018823	0.000183894	0.000179131	0.000171859	0.000158847	0.000144876	0.000131685
1446.74	8.611	6.27897e-05	5.03261e-05	5.01047e-05	4.98491e-05	4.95867e-05	4.93627e-05	4.91081e-05	4.86701e-05	4.81786e-05	4.77066e-05	4.69039e-05	4.61126e-05	4.51708e-05	4.36701e-05	4.15609e-05	3.94772e-05	3.81261e-05
1454.19	8.613	3.62707e-06	3.59927e-06	3.61217e-06	3.60993e-06	3.61793e-06	3.57657e-06	3.58387e-06	3.58776e-06	3.62445e-06	3.60035e-06	3.61103e-06	3.67821e-06	3.74312e-06	3.80042e-06	4.07329e-06	4.2709e-06	4.73264e-06
1461.64	8.614	3.15983e-07	2.10063e-07	2.12773e-07	2.30773e-07	2.06446e-07	2.1306e-07	2.3571e-07	2.22089e-07	1.96365e-07	2.21042e-07	2.04927e-07	1.58443e-07	1.57479e-07	2.50152e-07	1.81694e-07	9.01359e-08	1.86235e-07
1469.08	8.615	5.96996e-06	5.41807e-06	5.43617e-06	5.41578e-06	5.38558e-06	5.3874e-06	5.39062e-06	5.37126e-06	5.38885e-06	5.3216e-06	5.3286e-06	5.31129e-06	5.29293e-06	5.23408e-06	5.25967e-06	5.21799e-06	5.29318e-06
1476.53	8.617	1.08446e-05	1.08394e-05	1.08865e-05	1.08599e-05	1.08654e-05	1.08744e-05	1.08569e-05	1.07967e-05	1.08938e-05	1.08886e-05	1.08729e-05	1.09625e-05	1.10626e-05	1.1223e-05	1.16831e-05	1.22099e-05	1.28468e-05
1483.98	8.618	3.27925e-06	3.07476e-06	3.05429e-06	3.09184e-06	3.04866e-06	3.04654e-06	3.04241e-06	3.04093e-06	3.0824e-06	3.0698e-06	3.04869e-06	3.0601e-06	3.05393e-06	3.02739e-06	3.19879e-06	3.24779e-06	3.44677e-06
1491.43	8.62	1.61698e-06	1.31575e-06	1.29206e-06	1.2696e-06	1.26682e-06	1.21723e-06	1.19907e-06	1.19497e-06	1.10871e-06	1.14278e-06	1.04192e-06	1.00096e-06	8.99265e-07	7.95174e-07	7.69448e-07	5.64419e-07	3.27736e-07
1498.87	8.621	2.94117e-06	2.5561e-06	2.57887e-06	2.57237e-06	2.54138e-06	2.50503e-06	2.47319e-06	2.46123e-06	2.4003e-06	2.33447e-06	2.31946e-06	2.17362e-06	2.11893e-06	2.04562e-06	2.12e-06	1.6159e-06	1.59522e-06
1506.32	8.622	5.62247e-08	7.51103e-08	6.35494e-08	5.30026e-08	9.43412e-08	4.56132e-08	4.98941e-08	6.54008e-08	4.16101e-08	4.30434e-08	3.17516e-08	5.40994e-08	1.26846e-07	1.19804e-07	6.61177e-08	4.7569e-08	7.82328e-08
1513.76	8.624	4.77049e-08	9.13545e-09	1.21515e-08	7.65965e-09	1.71184e-08	9.94924e-09	2.29862e-08	7.4227e-09	3.18313e-09	8.35121e-09	2.15028e-08	1.53998e-08	4.18455e-09	0	4.51007e-08	0	-7.95822e-10
1521.21	8.625	6.23538e-07	4.14977e-07	5.03088e-07	4.58133e-07	4.19705e-07	4.49567e-07	4.37144e-07	4.34721e-07	4.11588e-07	3.73912e-07	4.20913e-07	3.91229e-07	3.86117e-07	2.44205e-07	1.28391e-07	-2.9098e-09	-1.02289e-07
1528.66	8.627	9.27866e-06	7.83283e-06	7.72361e-06	7.69003e-06	7.63681e-06	7.52027e-06	7.42337e-06	7.29929e-06	7.04265e-06	6.85291e-06	6.74482e-06	6.64089e-06	6.22439e-06	6.15135e-06	5.68956e-06	3.11718e-06	2.99419e-06
1536.1	8.628	3.90558e-05	3.52177e-05	3.50539e-05	3.4847e-05	3.4676e-05	3.44979e-05	3.43271e-05	3.40381e-05	3.37718e-05	3.3559e-05	3.32149e-05	3.31382e-05	3.20143e-05	3.06516e-05	2.9405e-05	2.50382e-05	2.55801e-05
1543.55	8.629	2.22587e-05	1.98855e-05	1.97997e-05	1.96958e-05	1.95722e-05	1.95154e-05	1.9391e-05	1.92322e-05	1.90673e-05	1.89079e-05	1.86561e-05	1.84883e-05	1.79241e-05	1.72066e-05	1.68605e-05	1.41435e-05	1.40522e-05
1550.99	8.631	4.41557e-07	3.82213e-07	3.5837e-07	4.06444e-07	3.69147e-07	3.5068e-07	3.78312e-07	3.97438e-07	3.94135e-07	3.6232e-07	3.40805e-07	3.47339e-07	3.13667e-07	3.22874e-07	1.49885e-07	1.81887e-07	2.43585e-07
1558.43	8.632	3.39446e-07	3.23323e-07	2.63986e-07	2.75373e-07	2.89353e-07	2.84766e-07	3.04109e-07	3.21027e-07	2.70251e-07	3.10242e-07	2.46203e-07	3.03806e-07	3.20202e-07	3.12534e-07	2.66965e-07	1.84332e-07	2.10349e-07
1565.88	8.634	2.63722e-05	2.27647e-05	2.25452e-05	2.2409e-05	2.22463e-05	2.2065e-05	2.18662e-05	2.15456e-05	2.1395e-05	2.12105e-05	2.09455e-05	2.069e-05	1.98868e-05	1.87225e-05	1.75924e-05	1.52774e-05	1.70073e-05
1573.32	8.635	0.000217124	0.000218543	0.000217303	0.000216165	0.000215047	0.000213833	0.000212838	0.00021049	0.000208514	0.000206643	0.0002033	0.000200372	0.000194988	0.000187392	0.000175472	0.000154419	0.000143021
1580.76	8.636	0.000139246	0.000140219	0.000139412	0.000138659	0.000137882	0.000137208	0.000136506	0.000135065	0.000133723	0.000132454	0.000130063	0.000128029	0.000124627	0.000119543	0.000112069	9.79921e-05	9.10466e-05
1588.2	8.638	9.5648e-06	8.11688e-06	8.05716e-06	7.97296e-06	7.87978e-06	7.83321e-06	7.75897e-06	7.61962e-06	7.55014e-06	7.47347e-06	7.33056e-06	7.20378e-06	6.81914e-06	6.39697e-06	6.19994e-06	4.81568e-06	4.82695e-06
1595.65	8.639	2.11228e-05	1.85296e-05	1.83978e-05	1.83537e-05	1.82469e-05	1.81462e-05	1.80202e-05	1.79221e-05	1.77921e-05	1.76682e-05	1.75409e-05	1.7627e-05	1.69656e-05	1.60291e-05	1.44544e-05	1.08722e-05	1.09181e-05
1603.09	8.641	0.000199703	0.000205711	0.000204592	0.000203453	0.000202453	0.000201422	0.000200408	0.000198348	0.000196452	0.000194771	0.00019143	0.00018866	0.000183466	0.000175376	0.000163812	0.000141852	0.000130409
1610.53	8.642	0.00015874	0.000161695	0.000160886	0.000159926	0.000159028	0.000158318	0.000157373	0.000155867	0.000154253	0.000153179	0.000150369	0.000148148	0.000143984	0.000137199	0.000128312	0.000110694	0.00010345
1617.97	8.643	3.07101e-05	2.65181e-05	2.62296e-05	2.60455e-05	2.587e-05	2.57034e-05	2.54001e-05	2.50535e-05	2.47036e-05	2.43687e-05	2.36583e-05	2.32334e-05	2.248e-05	2.16617e-05	2.24998e-05	1.75255e-05	1.68938e-05
1625.41	8.645	3.82427e-06	3.0219e-06	2.9827e-06	2.86364e-06	2.72118e-06	2.68786e-06	2.42312e-06	2.36921e-06	2.01082e-06	2.05672e-06	2.13119e-06	2.0177e-06	1.80731e-06	1.56416e-06	6.72875e-07	-1.10749e-07	-3.91075e-07
1632.85	8.646	4.15531e-06	3.78277e-06	3.78131e-06	3.74501e-06	3.76254e-06	3.70472e-06	3.70857e-06	3.56317e-06	3.5351e-06	3.47221e-06	3.36526e-06	3.23144e-06	3.01422e-06	2.37797e-06	1.5916e-06	-2.76599e-08	-4.62935e-07
1640.29	8.648	3.09341e-05	2.76898e-05	2.74687e-05	2.72878e-05	2.71465e-05	2.69735e-05	2.68401e-05	2.65526e-05	2.63612e-05	2.61315e-05	2.58444e-05	2.58059e-05	2.50049e-05	2.40515e-05	2.30582e-05	1.86228e-05	1.97204e-05
1647.73	8.649	3.0117e-05	2.76176e-05	2.74332e-05	2.73393e-05	2.72005e-05	2.70772e-05	2.6992e-05	2.68075e-05	2.66721e-05	2.65339e-05	2.63974e-05	2.64603e-05	2.55826e-05	2.44487e-05	2.34224e-05	2.01538e-05	2.23288e-05
1655.17	8.65	1.00835e-05	8.72985e-06	8.59329e-06	8.56338e-06	8.52505e-06	8.44719e-06	8.53749e-06	8.43339e-06	8.36509e-06	8.3075e-06	8.29543e-06	8.35217e-06	8.0699e-06	7.54143e-06	7.89492e-06	7.15467e-06	8.50876e-06
1662.61	8.652	2.62687e-06	2.29387e-06	2.18857e-06	2.20773e-06	2.08457e-06	2.09251e-06	2.06971e-06	2.00299e-06	1.9284e-06	1.97329e-06	1.93718e-06	1.9944e-06	1.79973e-06	1.54206e-06	1.08258e-06	2.56848e-07	1.33481e-07
1670.05	8.653	1.22964e-06	9.95162e-07	1.01148e-06	1.00146e-06	9.93592e-07	1.02382e-06	9.9031e-07	9.85537e-07	9.51809e-07	9.41737e-07	9.4907e-07	9.46225e-07	8.67736e-07	8.04966e-07	8.49371e-07	7.03855e-07	8.18166e-07
1677.48	8.655	3.18119e-07	2.87987e-07	3.26478e-07	2.76259e-07	2.24002e-07	2.86942e-07	2.97959e-07	3.11138e-07	2.63875e-07	2.24292e-07	1.82014e-07	2.02848e-07	1.91771e-07	2.26881e-07	1.5137e-07	1.87534e-07	2.27769e-07
1684.92	8.656	1.60209e-07	1.47787e-07	1.33719e-07	1.33825e-07	7.24656e-08	1.11439e-07	1.73882e-07	1.38297e-07	1.04887e-07	1.72329e-07	1.9617e-07	1.40096e-07	1.53939e-07	7.9509e-08	1.12758e-07	1.17128e-07	1.01424e-07
1692.36	8.657	5.58123e-08	5.46592e-08	1.32578e-08	2.74102e-08	6.07955e-08	2.2642e-08	3.9984e-08	2.51022e-08	2.45907e-08	1.5748e-08	1.19664e-08	2.87589e-08	2.1708e-08	4.74667e-08	1.93171e-08	1.52474e-08	6.97548e-08
1699.8	8.659	1.16117e-08	8.7364e-09	0	6.40535e-09	1.31018e-08	0	7.99222e-25	1.11633e-23	0	9.72922e-09	0	8.86523e-09	3.44611e-08	1.0259e-08	6.14105e-09	3.10926e-09	1.59201e-08
1707.23	8.66	1.77002e-08	3.06271e-24	3.27645e-08	4.35998e-08	5.66176e-08	3.11922e-08	3.44986e-08	2.60112e-08	2.19203e-08	3.01785e-08	7.45997e-09	9.00061e-08	1.37815e-08	-1.42829e-08	2.1658e-08	2.66867e-08	3.17196e-08
1714.67	8.662	1.50623e-08	0	4.64888e-09	9.86076e-09	-4.04166e-10	3.32653e-09	0	0	1.19028e-08	1.61749e-08	1.95861e-08	3.65638e-08	1.53656e-08	1.85839e-08	2.23376e-09	7.74095e-09	1.16308e-08
1722.1	8.663	5.81922e-09	1.12881e-08	0	5.94182e-08	1.92336e-08	0	0	0	2.8947e-08	3.6016e-08	-1.9339e-09	0	5.72566e-09	1.85229e-08	4.45718e-10	7.73654e-09	2.19555e-08
1729.54	8.664	0	-4.50503e-09	-9.15594e-09	0	0	-1.28076e-24	3.70412e-09	1.08434e-08	-6.00471e-24	0	-4.22316e-09	1.49695e-08	4.50926e-09	0	2.94063e-09	2.96799e-09	4.77071e-09
1736.97	8.666	0	1.43391e-08	0	1.57767e-08	0	0	0	1.63956e-08	1.83361e-08	0	0	6.2737e-08	0	0	3.93318e-09	9.244e-09	2.76802e-08
1744.41	8.667	0	0	0	0	0	0	0	-2.47458e-09	0	0	0	0	0	-9.82555e-09	9.80012e-10	-1.11477e-08	-6.48212e-09
1751.84	8.669	1.59201e-07	1.50289e-07	1.05496e-07	1.20136e-07	1.38267e-07	1.42489e-07	1.33721e-07	1.31921e-07	1.25439e-07	1.10764e-07	1.40584e-07	1.2874e-07	1.13449e-07	1.15859e-07	1.45554e-07	1.17875e-07	1.64277e-07
1759.27	8.67	2.21772e-07	2.83089e-07	1.36567e-07	2.16012e-07	1.81251e-07	2.56436e-07	1.93859e-07	2.15052e-07	2.25075e-07	1.63518e-07	9.16292e-08	1.92076e-07	6.37279e-08	4.72364e-08	1.75014e-07	1.48687e-07	1.87456e-07
1766.71	8.671	1.03897e-07	1.70522e-07	1.06869e-07	1.25642e-07	1.22937e-07	1.55568e-07	1.26609e-07	9.94507e-08	1.56699e-07	1.40337e-07	5.38419e-08	7.91318e-08	1.28541e-07	1.85142e-07	1.04823e-07	9.3328e-08	1.20326e-07
1774.14	8.673	1.81411e-08	3.98415e-08	4.23374e-08	2.02188e-08	2.75011e-08	0	3.03011e-08	1.16338e-08	1.01754e-08	4.79354e-08	-1.44145e-09	2.60229e-08	4.45952e-08	3.51926e-08	1.85405e-08	1.33225e-08	-1.70202e-08
1781.57	8.674	1.00428e-08	-2.80732e-10	1.26462e-08	7.40102e-09	1.37314e-08	4.5433e-08	3.34856e-08	1.53931e-08	4.10259e-10	4.55736e-08	2.33517e-08	3.5755e-09	9.64191e-09	1.04111e-08	2.26808e-08	1.89527e-08	1.77718e-08
1789.01	8.676	3.54739e-07	1.45588e-07	2.01593e-07	1.60156e-07	1.42332e-07	1.56072e-07	2.77455e-07	2.52265e-07	1.57323e-07	2.27126e-07	1.80541e-07	1.62426e-07	3.27601e-07	1.13522e-07	2.04712e-07	2.64876e-07	2.66084e-07
1796.44	8.677	8.60078e-08	6.78004e-08	1.19628e-07	9.97947e-08	1.20512e-07	1.63571e-07	1.03904e-07	1.351e-07	1.17921e-07	9.46072e-08	6.01354e-08	1.52139e-07	1.01823e-07	1.24081e-07	1.77955e-07	2.02463e-07	2.17798e-07
1803.87	8.678	1.89505e-07	1.20362e-08	6.30687e-08	2.70137e-08	1.6659e-08	1.03757e-07	5.59972e-08	1.06844e-07	1.02049e-08	1.31586e-08	1.51466e-08	5.41231e-08	2.43201e-08	2.03424e-08	4.93796e-08	4.91539e-08	2.55071e-08
1811.3	8.68	3.94231e-09	2.6507e-08	1.29094e-08	4.64252e-09	7.76145e-09	2.54948e-08	2.21706e-08	4.636e-08	-8.72093e-10	9.83871e-09	5.63119e-09	1.72922e-08	-1.97846e-10	1.22393e-08	3.8808e-09	5.81816e-09	1.67463e-09
1818.73	8.681	2.63224e-09	-4.15078e-08	-5.76062e-08	-4.01424e-08	-5.08134e-08	-3.63601e-08	-3.7479e-08	-5.43998e-08	-6.21879e-08	-5.03131e-08	-4.13759e-08	-4.45303e-08	-5.95746e-08	-6.49683e-08	-5.86045e-08	-1.23988e-07	-1.12486e-07
1826.16	8.683	-2.38626e-09	1.0246e-08	1.54256e-08	2.23996e-08	1.56504e-08	1.90023e-08	2.31564e-08	4.24022e-09	1.52667e-08	2.30724e-08	2.78432e-08	2.40104e-08	2.08814e-08	3.42337e-08	2.87916e-08	7.53877e-09	2.91652e-08
1833.59	8.684	8.80789e-08	1.25562e-07	1.24179e-07	1.25802e-07	1.25936e-07	1.26079e-07	1.26235e-07	1.10714e-07	1.11058e-07	1.2742e-07	1.14198e-07	1.33278e-07	1.35129e-07	1.38846e-07	1.14593e-07	1.26467e-07	1.16131e-07
1841.02	8.685	-7.82702e-09	-1.05463e-08	-1.05541e-08	-1.05625e-08	-1.05715e-08	-1.0581e-08	-1.05912e-08	-1.06136e-08	-1.0639e-08	-1.4741e-08	-1.48365e-08	-1.4958e-08	-1.09373e-08	-1.11618e-08	-1.17421e-08	-1.26922e-08	-1.36103e-08
1848.45	8.687	-2.61342e-08	-4.34648e-08	-4.35277e-08	-4.35943e-08	-4.36655e-08	-4.66989e-08	-4.67849e-08	-4.56983e-08	-4.5905e-08	-4.61369e-08	-4.66887e-08	-4.73758e-08	-4.64405e-08	-4.80478e-08	-5.20252e-08	-5.81088e-08	-3.0891e-08
1855.88	8.688	-6.47566e-08	-8.19417e-08	-8.38874e-08	-8.39471e-08	-8.40112e-08	-8.40808e-08	-8.41557e-08	-8.43234e-08	-8.53042e-08	-5.04197e-08	-8.52962e-08	-8.60232e-08	-5.50184e-08	-8.89341e-08	-9.40788e-08	-1.02586e-07	-1.10792e-07
1863.31	8.69	4.02347e-08	9.02951e-08	8.04594e-08	8.06277e-08	9.72779e-08	6.20275e-08	1.57884e-07	9.24395e-08	6.31847e-08	8.26882e-08	1.05097e-07	1.19365e-07	1.4705e-07	1.21839e-07	1.18826e-07	1.20921e-07	9.96134e-08
1870.73	8.691	1.27716e-05	1.31675e-05	1.31846e-05	1.31723e-05	1.32078e-05	1.3169e-05	1.31071e-05	1.32005e-05	1.32392e-05	1.31696e-05	1.31687e-05	1.31496e-05	1.31825e-05	1.3252e-05	1.34209e-05	1.37526e-05	1.40033e-05
1878.16	8.692	4.98763e-05	3.90231e-05	3.89667e-05	3.89447e-05	3.89217e-05	3.88312e-05	3.88331e-05	3.86608e-05	3.85513e-05	3.8363e-05	3.81699e-05	3.7803e-05	3.74633e-05	3.68656e-05	3.5842e-05	3.47079e-05	3.39462e-05
1885.59	8.694	3.44634e-05	2.89671e-05	2.89121e-05	2.88669e-05	2.88328e-05	2.8734e-05	2.87807e-05	2.86601e-05	2.86184e-05	2.85255e-05	2.83112e-05	2.80875e-05	2.7814e-05	2.73745e-05	2.65227e-05	2.55744e-05	2.48779e-05
1893.01	8.695	7.3866e-06	1.10478e-05	1.1093e-05	1.11276e-05	1.11594e-05	1.11596e-05	1.12027e-05	1.12335e-05	1.13392e-05	1.1377e-05	1.14983e-05	1.17536e-05	1.19963e-05	1.23952e-05	1.3546e-05	1.52246e-05	1.69164e-05
1900.44	8.697	3.03141e-06	4.13883e-06	4.12739e-06	4.15736e-06	4.11669e-06	4.17652e-06	4.08799e-06	4.16985e-06	4.16233e-06	4.17415e-06	4.10224e-06	4.22717e-06	4.24092e-06	4.27912e-06	4.6109e-06	4.98161e-06	5.36102e-06
1907.86	8.698	2.76348e-06	4.2322e-06	4.1771e-06	4.2717e-06	4.19921e-06	4.15471e-06	4.23983e-06	4.26352e-06	4.34201e-06	4.24438e-06	4.32927e-06	4.39999e-06	4.48954e-06	4.64327e-06	5.03085e-06	5.62714e-06	6.23275e-06
1915.29	8.699	5.70927e-07	6.9926e-07	7.28767e-07	7.65818e-07	6.76555e-07	8.29405e-07	7.49169e-07	7.69732e-07	7.67876e-07	7.6424e-07	7.85254e-07	7.56277e-07	7.29132e-07	8.0476e-07	8.24346e-07	8.89181e-07	1.00932e-06
1922.71	8.701	5.07425e-07	6.24664e-07	6.27136e-07	6.05636e-07	6.32492e-07	6.27738e-07	6.58146e-07	6.932e-07	6.95837e-07	6.35611e-07	6.388e-07	6.23014e-07	6.31457e-07	6.89287e-07	7.39783e-07	7.74564e-07	9.13596e-07
1930.14	8.702	7.36772e-07	8.04948e-07	7.58008e-07	7.58336e-07	7.83901e-07	7.9952e-07	7.99457e-07	8.17374e-07	8.31137e-07	7.89826e-07	8.47018e-07	8.37713e-07	7.96848e-07	8.62172e-07	9.72965e-07	1.14658e-06	1.21887e-06
1937.56	8.704	2.18983e-05	1.7143e-05	1.70202e-05	1.70469e-05	1.69431e-05	1.6914e-05	1.68423e-05	1.68175e-05	1.66739e-05	1.66174e-05	1.64041e-05	1.62642e-05	1.60775e-05	1.57918e-05	1.54701e-05	1.55703e-05	1.57001e-05
1944.98	8.705	0.000391688	0.000303671	0.000302051	0.000300351	0.000298586	0.000296844	0.000295114	0.000291594	0.000288096	0.000284525	0.000277246	0.000269884	0.000261753	0.000248914	0.000225144	0.000198893	0.000174586
1952.41	8.706	0.00115085	0.000918536	0.000913391	0.000908212	0.000902964	0.000897642	0.000892286	0.000881493	0.000870522	0.000859324	0.000836388	0.000812632	0.000788246	0.000748526	0.000671064	0.000588793	0.000510557
1959.83	8.708	0.00112116	0.000921754	0.000917406	0.000912954	0.000908482	0.000904001	0.000899445	0.000890296	0.000881021	0.000871521	0.000852137	0.000831947	0.000810126	0.000774523	0.000703964	0.000625319	0.000550044
1967.25	8.709	0.000994834	0.000836066	0.000831482	0.000826992	0.000822565	0.000817955	0.000813424	0.000804323	0.000795269	0.000786118	0.000767691	0.000748826	0.000729499	0.000698954	0.000641007	0.000579687	0.000519178
1974.67	8.711	0.000300259	0.000280208	0.000278708	0.000277232	0.000275693	0.000274304	0.000272691	0.000269868	0.000266949	0.000263933	0.000257886	0.000251937	0.000244707	0.000233095	0.000210143	0.000182499	0.000154895
1982.09	8.712	6.92352e-05	6.06472e-05	6.02303e-05	5.99089e-05	5.97641e-05	5.92699e-05	5.91409e-05	5.81429e-05	5.77774e-05	5.74582e-05	5.63061e-05	5.55791e-05	5.43072e-05	5.21204e-05	4.92968e-05	4.2006e-05	4.06676e-05
1989.52	8.714	4.44293e-05	4.0037e-05	3.99534e-05	3.97854e-05	3.96376e-05	3.95917e-05	3.95058e-05	3.93898e-05	3.9364e-05	3.93839e-05	3.98665e-05	4.03421e-05	3.95166e-05	3.85815e-05	3.83731e-05	3.61721e-05	4.04089e-05
1996.94	8.715	0.000580845	0.000521378	0.000519489	0.000517431	0.000515586	0.000513758	0.000511705	0.000507794	0.000503855	0.000499863	0.000491779	0.000483235	0.000474358	0.000459761	0.000428784	0.000393816	0.000358319
2004.35	8.716	0.0035585	0.00256883	0.00255211	0.00253536	0.00251831	0.00250117	0.00248396	0.00244905	0.00241348	0.00237732	0.00230296	0.0022254	0.00214681	0.00201979	0.00177355	0.00151744	0.00130005
2011.77	8.718	0.00276801	0.00218202	0.00216907	0.00215598	0.00214275	0.0021295	0.002116	0.00208893	0.00206122	0.00203293	0.0019747	0.00191316	0.00185373	0.0017563	0.00156095	0.00136269	0.00117188
2019.19	8.719	0.00168699	0.00138046	0.00137281	0.00136517	0.00135738	0.0013496	0.00134173	0.0013259	0.00130999	0.00129366	0.00126022	0.00122546	0.00119144	0.00113579	0.00102454	0.000911088	0.000793843
2026.61	8.721	0.000592886	0.000527351	0.000523986	0.000520794	0.000517605	0.000514485	0.000511307	0.000504882	0.000498599	0.000492251	0.000479399	0.000466263	0.000453028	0.000432217	0.000390746	0.000343938	0.000296864
2034.03	8.722	0.00028739	0.000254121	0.00025249	0.000250888	0.00024928	0.000247696	0.000246194	0.000243365	0.000240649	0.00023824	0.000233942	0.000230433	0.000223385	0.000214052	0.000201506	0.000170528	0.000168491
2041.45	8.723	0.000311513	0.000295299	0.000294097	0.000292531	0.000291187	0.000289754	0.000288544	0.000285677	0.000283216	0.000281022	0.000276966	0.000274627	0.000268451	0.000258832	0.000242475	0.000210387	0.000198662
2048.86	8.725	0.000643587	0.000605278	0.000602314	0.000598923	0.000595848	0.000592804	0.000589628	0.000583218	0.000576274	0.000569371	0.00055557	0.000540842	0.000527045	0.00050423	0.000457043	0.00040509	0.000352985
2056.28	8.726	0.000989175	0.000875935	0.000871379	0.000867004	0.000862496	0.000858234	0.000853579	0.000844498	0.000835506	0.000826026	0.000806788	0.000786557	0.000767846	0.00073772	0.000676372	0.000615516	0.000551969
2063.7	8.727	0.000783932	0.000706664	0.000702896	0.00069935	0.000695677	0.000691822	0.000688126	0.00068048	0.000672847	0.00066497	0.000649018	0.000632268	0.000616715	0.000590933	0.000539027	0.000484849	0.000428724
2071.11	8.729	0.000709324	0.000641809	0.000638036	0.000634424	0.000630468	0.00062703	0.000623339	0.000615807	0.000608309	0.000600627	0.000584817	0.000568613	0.000553494	0.000529252	0.000479301	0.000424644	0.000369593
2078.53	8.73	0.000388062	0.000359556	0.000357435	0.000355478	0.000353377	0.000351482	0.000349384	0.00034579	0.000342253	0.000338652	0.000332102	0.00032618	0.000317324	0.000303498	0.000280498	0.00024215	0.000221866
2085.94	8.732	0.000307351	0.000278641	0.000276972	0.000275193	0.000273456	0.000271772	0.000270109	0.00026675	0.000263886	0.000260841	0.000255822	0.000251674	0.000243461	0.000231466	0.00021277	0.000179693	0.000170205
2093.36	8.733	0.000149429	0.000130475	0.000129437	0.000128541	0.000127612	0.000126763	0.000125796	0.000124098	0.000122462	0.00012106	0.000118759	0.000117309	0.000112827	0.000106976	0.000101796	7.59936e-05	8.2357e-05
2100.77	8.734	5.93183e-05	5.32976e-05	5.28726e-05	5.27252e-05	5.23679e-05	5.20993e-05	5.18264e-05	5.12719e-05	5.14023e-05	5.12044e-05	5.16092e-05	5.15232e-05	4.98174e-05	4.8115e-05	4.55563e-05	3.17055e-05	4.29068e-05
2108.18	8.736	2.65578e-05	2.34056e-05	2.32306e-05	2.31526e-05	2.3067e-05	2.30342e-05	2.28614e-05	2.29124e-05	2.29121e-05	2.27176e-05	2.2946e-05	2.32902e-05	2.3024e-05	2.23098e-05	1.73814e-05	1.12643e-05	2.35939e-05
2115.59	8.737	2.21289e-05	1.88211e-05	1.87396e-05	1.82712e-05	1.82585e-05	1.7715e-05	1.7624e-05	1.75221e-05	1.7086e-05	1.63472e-05	1.56964e-05	1.55743e-05	1.44489e-05	1.29478e-05	9.81055e-06	1.07717e-06	-5.84659e-06
2123.01	8.739	4.52507e-06	3.82857e-06	3.61398e-06	3.57354e-06	3.48985e-06	3.46979e-06	3.29669e-06	3.18238e-06	2.99119e-06	3.05911e-06	2.77634e-06	2.65552e-06	2.55513e-06	2.50383e-06	3.50047e-06	2.26578e-06	3.34892e-06
2130.42	8.74	2.35483e-06	2.08562e-06	1.92733e-06	1.91326e-06	1.8308e-06	1.63343e-06	1.66146e-06	1.61336e-06	1.60292e-06	1.56126e-06	1.46764e-06	1.40952e-06	1.21956e-06	9.43376e-07	5.86011e-07	-1.47278e-06	-1.2679e-06
2137.83	8.741	1.72501e-06	1.49216e-06	1.44432e-06	1.42755e-06	1.38618e-06	1.35172e-06	1.31688e-06	1.09515e-06	9.56641e-07	9.25172e-07	5.82731e-07	4.90147e-07	2.68584e-07	-8.8402e-08	-8.35153e-07	-3.03148e-06	-3.83446e-06
2145.24	8.743	9.06601e-06	7.54529e-06	7.691e-06	7.23702e-06	7.39083e-06	6.92457e-06	7.25093e-06	7.10056e-06	6.74214e-06	6.66144e-06	6.08339e-06	6.04623e-06	5.87517e-06	6.41478e-06	9.75534e-06	1.27741e-05	2.3221e-05
2152.65	8.744	1.48682e-05	1.32732e-05	1.28901e-05	1.28053e-05	1.28722e-05	1.2686e-05	1.22549e-05	1.21304e-05	1.18091e-05	1.16381e-05	1.12109e-05	1.08683e-05	1.10635e-05	1.17724e-05	1.51335e-05	1.05486e-05	1.10921e-05
2160.06	8.746	1.26367e-05	1.07387e-05	1.05347e-05	1.03736e-05	1.04229e-05	1.01623e-05	9.80674e-06	9.54659e-06	9.22296e-06	9.04498e-06	8.50619e-06	8.07593e-06	7.26873e-06	6.05521e-06	3.90932e-06	5.63052e-06	1.50832e-05
2167.47	8.747	9.32677e-06	8.40884e-06	8.23598e-06	8.27432e-06	7.8577e-06	7.90409e-06	7.88735e-06	7.41219e-06	7.51354e-06	7.30068e-06	7.10596e-06	7.1013e-06	6.57207e-06	5.75353e-06	4.18955e-06	2.23708e-06	6.10914e-06
2174.88	8.748	3.28839e-06	2.51157e-06	2.5717e-06	2.67262e-06	2.64548e-06	2.5257e-06	2.7179e-06	2.59599e-06	2.54553e-06	2.36937e-06	2.08307e-06	1.9611e-06	1.5434e-06	3.80352e-07	-1.16115e-06	-4.00255e-06	-6.86256e-06
2182.28	8.75	6.69833e-07	4.91754e-07	5.58825e-07	5.27567e-07	2.84777e-07	4.14975e-07	3.88761e-07	7.00827e-07	5.11382e-07	3.83997e-07	3.88363e-07	4.15121e-07	3.65571e-07	3.08197e-07	1.65999e-07	-1.9206e-07	-4.03168e-07
2189.69	8.751	9.61023e-07	8.35097e-07	7.76149e-07	8.95676e-07	8.10952e-07	8.25526e-07	7.2757e-07	7.94372e-07	7.42022e-07	7.57978e-07	7.69695e-07	7.75857e-07	7.66096e-07	7.3574e-07	7.41447e-07	4.95101e-07	8.00164e-07
2197.1	8.753	3.50269e-07	2.41841e-07	3.95336e-07	3.23713e-07	3.44878e-07	2.49687e-07	2.6601e-07	1.61658e-07	3.94152e-07	2.51244e-07	2.68919e-07	2.43163e-07	2.41046e-07	1.86266e-07	2.4762e-07	2.52655e-07	2.16898e-07
2204.5	8.754	1.18979e-07	4.10151e-08	8.3604e-08	1.55283e-07	4.29609e-09	7.73282e-08	3.92914e-08	6.96925e-09	8.68846e-08	6.70476e-08	4.9259e-08	6.8399e-08	6.70848e-08	3.62572e-08	9.17382e-08	8.23618e-08	2.05582e-07
2211.91	8.755	3.56082e-07	2.43553e-07	2.86798e-07	3.42748e-07	2.39676e-07	2.8533e-07	2.12023e-07	2.96028e-07	2.66024e-07	2.80884e-07	2.94862e-07	3.05977e-07	2.82351e-07	2.60561e-07	2.80015e-07	1.12862e-07	2.0932e-07
2219.31	8.757	1.58593e-07	0	1.45871e-07	1.40163e-07	1.02781e-07	2.28722e-07	1.66467e-07	1.77115e-07	2.78819e-07	1.42067e-07	1.43892e-07	1.42219e-07	1.69237e-07	1.35584e-07	1.64326e-07	1.2347e-07	3.2432e-07
2226.72	8.758	6.70151e-08	1.0921e-07	3.21106e-07	1.08485e-07	1.95177e-07	2.88835e-07	1.36555e-07	1.0352e-07	2.89214e-07	1.46085e-07	1.5386e-07	1.21878e-07	1.29033e-07	1.51186e-07	1.26386e-07	1.9168e-08	-8.65039e-09
2234.12	8.76	1.72034e-08	1.3968e-07	0	1.26506e-07	1.07422e-07	3.34985e-08	5.57007e-09	6.60227e-08	3.6451e-08	6.55049e-08	5.15808e-08	4.39412e-08	3.39001e-08	4.91253e-08	3.18814e-09	6.59225e-08	6.01923e-08
2241.53	8.761	0	8.08759e-08	4.54441e-08	9.197e-08	0	8.54345e-08	8.07657e-09	9.07949e-09	1.54708e-08	2.89619e-08	1.31905e-08	1.0849e-08	3.81954e-08	3.64264e-08	4.08366e-08	2.07268e-08	0
2248.93	8.763	4.69516e-08	1.28591e-07	1.6292e-07	6.73998e-08	1.51964e-07	9.91838e-08	1.00791e-07	8.32283e-08	1.10676e-07	1.08946e-07	1.10494e-07	1.1651e-07	1.21915e-07	1.11434e-07	6.37127e-08	1.53413e-07	6.17372e-08
2256.33	8.764	1.43056e-07	7.84873e-08	1.92716e-07	2.53981e-07	1.88113e-07	2.15819e-07	3.50578e-07	1.71256e-07	1.69551e-07	1.56586e-07	1.63871e-07	1.62449e-07	1.31313e-07	1.5467e-07	1.13217e-07	2.73756e-07	1.41416e-07
2263.73	8.765	1.03928e-07	6.90492e-08	1.69752e-08	2.03027e-08	1.17119e-08	2.91009e-08	8.49732e-08	4.45027e-08	4.86115e-08	4.95964e-08	5.69022e-08	4.92715e-08	6.28121e-08	8.93066e-08	4.26909e-08	1.10932e-07	1.70891e-08
2271.14	8.767	3.73723e-08	1.60002e-25	6.08276e-08	1.1213e-08	4.03917e-09	6.40671e-09	1.63995e-08	4.01499e-08	3.33872e-08	3.32523e-08	5.8766e-09	1.56831e-08	6.38026e-08	1.8623e-08	6.50993e-09	6.38739e-08	1.51843e-08
2278.54	8.768	8.70933e-24	3.06212e-24	1.97208e-08	1.05432e-07	3.10316e-08	3.09072e-08	2.46758e-08	6.48842e-08	4.9798e-08	3.03155e-08	6.94934e-08	4.512e-08	7.10644e-08	6.00687e-08	2.32022e-08	1.13671e-07	2.71843e-08
2285.94	8.77	0	1.06786e-24	1.5718e-08	1.51469e-09	5.39767e-24	1.04771e-08	7.28126e-09	1.28645e-08	1.04229e-08	9.55663e-09	2.78593e-08	1.0183e-08	2.84435e-08	-1.58773e-10	-4.33309e-09	2.27591e-08	-4.12603e-08
2293.34	8.771	0	2.91595e-24	1.69004e-08	1.13082e-08	1.04198e-08	0	0	1.38125e-08	0	5.45304e-09	2.75206e-08	0	7.18294e-09	5.48748e-08	5.33412e-08	4.7281e-08	2.44862e-08
2300.74	8.772	0	5.58779e-09	0	0	3.70841e-09	0	0	-7.69821e-10	4.44385e-09	7.53909e-09	0	0	2.05046e-08	7.08747e-09	4.79357e-08	1.73647e-23	-1.52239e-08
2308.14	8.774	0	0	0	3.60802e-08	0	1.06583e-08	3.34312e-08	0	1.83696e-08	6.02791e-09	0	0	0	5.51411e-09	3.0989e-08	-9.298e-09	-9.49371e-09
2315.53	8.775	0	0	2.65987e-24	4.71217e-08	0	7.79625e-09	2.01162e-08	9.57332e-09	3.49409e-09	1.05693e-09	1.59616e-08	0	0	-1.38771e-08	0	-2.12888e-08	-3.78739e-09
2322.93	8.777	0	0	-5.73927e-09	0	2.04476e-08	-3.41655e-09	3.96741e-09	0	0	4.15163e-09	0	1.74617e-08	0	0	0	0	8.85779e-09
2330.33	8.778	0	0	0	0	0	-6.60092e-09	1.4855e-24	4.47487e-09	0	0	0	-6.0547e-09	0	0	0	0	5.26285e-09
2337.73	8.779	0	0	0	-4.18098e-09	0	4.6295e-09	3.01127e-24	0	-5.85913e-09	-3.11902e-09	0	0	0	-1.12748e-08	0	0	1.41531e-08
2345.12	8.781	0	0	4.61366e-09	-1.412e-08	1.93683e-09	2.65913e-08	1.36951e-24	1.37287e-08	0	1.67525e-08	1.4421e-08	0	0	-2.22665e-08	0	0	1.14231e-08
2352.52	8.782	0	0	8.67024e-09	5.94267e-09	1.09579e-08	3.74166e-09	0	0	1.44373e-09	-5.08314e-09	0	0	0	3.7578e-08	0	0	7.84246e-25
2359.91	8.783	0	0	0	0	0	0	0	0	5.40944e-24	0	0	0	-1.23264e-08	0	0	9.10015e-08	6.80529e-09
2367.31	8.785	0	0	5.74145e-09	0	0	0	0	3.26914e-09	0	0	-1.74441e-08	0	3.27408e-08	0	0	0	-9.58842e-09
2374.7	8.786	0	-1.87906e-08	2.51243e-08	7.65158e-10	0	0	0	0	0	-1.19907e-24	2.65236e-24	0	1.77871e-08	0	4.8016e-24	0	1.56455e-08
2382.09	8.788	0	-3.0804e-24	-1.46629e-09	-7.80178e-09	0	6.93655e-09	0	1.51187e-08	0	1.29272e-08	0	1.10136e-08	5.13904e-24	0	4.08704e-08	0	-6.54104e-09
2389.49	8.789	0	0	0	-4.71349e-09	0	1.11544e-08	-8.49012e-09	0	1.73805e-08	0	1.15446e-24	0	-1.97653e-08	0	-4.12319e-08	0	-1.48391e-08
2396.88	8.79	0	5.14512e-09	5.29002e-09	0	0	5.38013e-09	-5.92962e-09	0	8.34993e-09	0	0	0	0	2.36106e-08	0	0	3.12755e-08
2404.27	8.792	0	4.43819e-09	3.29808e-24	0	8.43434e-09	6.51671e-09	0	0	0	0	0	0	0	0	0	0	2.34145e-08
2411.66	8.793	0	3.38269e-09	5.63265e-24	0	9.40081e-09	1.41036e-08	0	3.33467e-09	8.18275e-24	0	7.01352e-09	0	2.95458e-08	3.71985e-08	4.00977e-08	-2.09811e-08	-6.83139e-09
2419.05	8.795	0	2.65614e-09	0	1.15508e-08	0	1.10042e-08	0	0	0	0	0	-6.00894e-24	0	0	3.89819e-08	4.81836e-09	-8.39482e-09
2426.44	8.796	5.27552e-09	0	0	1.37473e-08	0	2.6977e-09	0	3.9108e-09	5.44933e-09	3.34543e-08	0	5.81512e-09	1.09239e-08	2.32178e-08	0	0	-4.9009e-10
2433.83	8.797	8.04846e-09	0	1.01431e-08	5.67961e-09	0	0	0	6.51693e-09	0	0	0	0	0	0	0	0	7.34622e-09
2441.22	8.799	0	5.07713e-09	0	6.48782e-09	0	0	1.64354e-08	1.13876e-08	0	0	2.44509e-08	7.50324e-09	0	0	0	2.36618e-08	-7.12615e-09
2448.61	8.8	1.0762e-08	3.25174e-08	0	0	0	0	1.02894e-08	0	1.72227e-08	0	2.02102e-08	2.13666e-08	0	1.51067e-08	0	0	-8.66313e-09
2455.99	8.802	0	2.8239e-08	1.55856e-08	1.18025e-08	1.36497e-08	1.70945e-08	2.94352e-24	1.65379e-08	0	5.90055e-09	0	2.20347e-08	0	0	6.55043e-08	0	2.34131e-08
2463.38	8.803	0	2.45487e-08	1.04601e-08	0	1.59602e-08	2.32206e-08	1.99134e-08	3.89492e-08	8.28607e-09	3.54344e-08	1.9888e-08	4.43262e-08	1.80735e-08	3.68619e-08	3.19599e-08	1.47424e-08	5.17525e-08
2470.77	8.804	3.9383e-09	1.20929e-07	5.1197e-08	2.22951e-08	3.86861e-08	9.78817e-08	9.52029e-08	1.34783e-07	4.01577e-08	8.85729e-08	7.50638e-08	9.29692e-08	4.89381e-08	3.41482e-08	5.73113e-09	2.12279e-08	4.92407e-08
2478.15	8.806	2.85682e-07	1.91678e-07	1.98775e-07	1.9189e-07	1.83473e-07	1.65869e-07	1.7884e-07	1.87242e-07	1.59101e-07	1.94336e-07	1.985e-07	1.69355e-07	1.70188e-07	1.4003e-07	1.45262e-07	1.88716e-07	2.11133e-07
2485.54	8.807	5.2033e-06	4.94282e-06	4.92959e-06	4.90664e-06	4.90072e-06	4.91419e-06	4.9416e-06	4.92529e-06	4.92825e-06	5.00081e-06	5.01737e-06	5.03278e-06	5.10944e-06	5.24082e-06	5.7548e-06	7.27028e-06	9.15031e-06
2492.92	8.809	2.02993e-06	1.89062e-06	1.94195e-06	1.91993e-06	1.87819e-06	1.88349e-06	1.8783e-06	1.90844e-06	1.90249e-06	1.88255e-06	1.87901e-06	1.87218e-06	1.89744e-06	1.83942e-06	2.12208e-06	2.37056e-06	2.80541e-06

## Sheet: k_PRISMA
Wavelength	FWHM	k_Summer_L	k_Summer_M	k_Summer_H	k_Winter_L	k_Winter_M	k_Winter_H	k_1976_L	k_1976_M	k_1976_H
943.093	11.1634	1.97568e-09	6.04221e-10	-4.11556e-10	0	0	0	-2.97034e-10	1.44792e-09	1.71523e-09	1.23633e-10	0	1.42131e-09	3.8796e-09	4.95765e-25	-1.81964e-10	3.78871e-10	3.08183e-09
951.123	11.2245	1.66455e-09	0	-3.52678e-10	0	-3.66358e-10	0	0	-4.17028e-10	0	1.76173e-10	0	7.29151e-10	0	9.45658e-25	0	2.24445e-10	0
959.679	12.4243	0	0	0	0	0	0	0	0	0	0	0	0	0	0	0	0	0
969.494	12.4752	0	0	0	0	0	0	0	0	0	0	0	0	0	0	0	0	0
978.688	12.2031	0	0	0	0	0	0	0	0	0	0	0	0	0	0	0	0	0
988.394	12.4208	0	0	0	0	0	0	0	0	0	0	0	0	0	0	0	0	0
998.492	13.0605	0	0	0	0	0	0	0	0	0	0	0	0	0	0	0	0	0
1008.29	12.7977	0	0	0	0	0	0	0	0	0	0	0	0	0	0	0	0	0
1018.18	13.3457	0	0	0	0	0	0	0	0	0	0	0	0	0	0	0	0	0
1028.97	13.3271	0	0	0	0	0	0	0	0	0	0	0	0	0	0	0	0	0
1038.22	13.3406	4.19842e-07	3.56777e-07	3.55403e-07	3.5731e-07	3.58468e-07	3.47538e-07	3.47168e-07	3.54002e-07	3.36532e-07	3.4222e-07	3.28219e-07	3.32168e-07	3.24285e-07	3.02451e-07	3.03052e-07	2.57784e-07	2.86483e-07
1047.9	13.6246	8.47627e-07	6.46982e-07	6.52599e-07	6.39206e-07	6.36141e-07	6.28614e-07	6.05157e-07	5.90988e-07	5.34388e-07	5.10101e-07	4.21657e-07	3.82013e-07	3.00646e-07	1.80427e-07	-2.79251e-08	-2.48924e-07	-3.74603e-07
1057.87	13.8052	4.64074e-07	3.84049e-07	3.81152e-07	3.86547e-07	3.72512e-07	3.69101e-07	3.56074e-07	3.55316e-07	3.27782e-07	3.18134e-07	2.69372e-07	2.58336e-07	2.45087e-07	2.27778e-07	1.65171e-07	1.10955e-07	4.8261e-08
1068.11	14.0138	1.99195e-07	1.66323e-07	1.65236e-07	1.6437e-07	1.60882e-07	1.58173e-07	1.61234e-07	1.66255e-07	1.57499e-07	1.57703e-07	1.45194e-07	1.6213e-07	1.5698e-07	1.478e-07	1.33164e-07	1.27675e-07	1.25304e-07
1078.56	14.1443	1.46714e-08	1.99628e-08	1.83337e-08	1.77927e-08	1.35775e-08	1.02757e-08	1.28192e-08	1.75475e-08	1.63837e-08	1.26627e-08	7.00934e-09	1.02851e-08	2.39869e-08	1.82564e-08	1.8382e-08	7.43478e-09	7.06183e-09
1089.09	14.237	0	-1.13411e-09	-1.04878e-09	-9.54424e-10	-4.69881e-10	-9.60441e-10	5.51125e-10	-1.4169e-09	3.90911e-09	5.23545e-26	7.26142e-10	6.40607e-10	1.54026e-09	-1.78213e-09	2.3516e-11	-1.85581e-09	-7.11859e-09
1099.62	14.2462	0	-2.2246e-09	1.06112e-09	-4.67171e-10	-1.21937e-10	9.53504e-10	1.28383e-09	-8.00572e-10	0	3.34851e-25	-7.93061e-10	0	-1.88715e-09	-3.67271e-10	-1.08708e-09	-2.89288e-09	-3.93531e-09
1110.27	14.509	0	1.63623e-10	1.29599e-09	0	0	2.01496e-09	0	2.68385e-09	-5.45965e-10	0	2.60488e-09	2.64265e-10	0	0	1.54935e-09	3.84263e-09	1.46846e-09
1121.01	14.2789	0	3.48686e-10	-4.74817e-10	2.26575e-09	0	0	-3.60895e-09	2.70297e-09	-6.04724e-10	0	0	2.44269e-10	-9.08621e-10	-4.99082e-10	-2.27215e-09	3.02426e-09	-2.25418e-09
1131.68	14.4797	0	3.4901e-09	-2.44455e-09	4.92542e-09	2.48159e-09	3.09643e-10	0	1.1275e-09	3.02048e-09	1.64753e-09	2.32758e-09	2.1753e-09	-5.12295e-09	0	0	0	2.82561e-10
1142.36	14.3065	0	3.6258e-11	0	0	0	1.69156e-10	0	0	0	-1.02474e-09	1.16279e-09	0	0	0	0	0	0
1153	14.5513	0	0	-8.64797e-25	-2.1583e-09	0	1.8128e-09	0	0	0	0	0	0	1.75241e-09	0	0	-5.30422e-09	-9.33569e-09
1164.03	14.8343	0	0	0	0	0	0	0	0	0	0	0	0	0	0	0	0	0
1175.07	14.4813	0	0	0	2.24521e-09	0	0	0	0	0	0	0	0	0	0	0	0	0
1185.9	14.5792	0	0	0	0	0	0	0	0	0	0	0	0	0	0	0	0	0
1196.7	14.5482	2.65482e-06	2.36734e-06	2.35523e-06	2.3469e-06	2.33395e-06	2.3265e-06	2.32473e-06	2.30449e-06	2.28959e-06	2.27512e-06	2.24483e-06	2.22978e-06	2.18591e-06	2.12513e-06	2.05605e-06	1.9501e-06	1.93747e-06
1207.6	14.6949	2.67415e-05	2.38046e-05	2.36696e-05	2.35506e-05	2.34466e-05	2.33259e-05	2.32255e-05	2.30154e-05	2.28149e-05	2.26016e-05	2.22492e-05	2.19707e-05	2.14285e-05	2.07058e-05	1.99567e-05	1.81614e-05	1.75598e-05
1218.23	14.5848	1.86971e-05	1.62575e-05	1.61718e-05	1.60793e-05	1.59963e-05	1.59012e-05	1.58095e-05	1.56481e-05	1.54999e-05	1.53583e-05	1.51199e-05	1.4954e-05	1.45658e-05	1.40467e-05	1.35357e-05	1.20552e-05	1.17914e-05
1229.48	15.038	6.38272e-06	5.51864e-06	5.48856e-06	5.45785e-06	5.42122e-06	5.3791e-06	5.35396e-06	5.27895e-06	5.20638e-06	5.16083e-06	5.05517e-06	4.98697e-06	4.84151e-06	4.63179e-06	4.42119e-06	3.80848e-06	3.72653e-06
1240.57	14.5454	5.53583e-07	4.79773e-07	4.77476e-07	4.75562e-07	4.72861e-07	4.69833e-07	4.6332e-07	4.51224e-07	4.4845e-07	4.42647e-07	4.45981e-07	4.58628e-07	4.37647e-07	3.97703e-07	4.00346e-07	3.61524e-07	3.69195e-07
1251.35	14.976	1.50937e-07	1.37403e-07	1.25422e-07	1.24092e-07	1.24e-07	1.32552e-07	1.29802e-07	1.33372e-07	1.29458e-07	1.21726e-07	1.38777e-07	1.20095e-07	1.14303e-07	9.40993e-08	1.1373e-07	1.1572e-07	1.63569e-07
1262.86	15.0231	2.2156e-07	1.96049e-07	1.96728e-07	2.0007e-07	1.81961e-07	1.89643e-07	1.88915e-07	1.85857e-07	1.78034e-07	1.78328e-07	1.80924e-07	1.68827e-07	1.45763e-07	1.58365e-07	1.86852e-07	1.86198e-07	2.05498e-07
1273.81	14.6921	1.19916e-08	9.45721e-09	1.65986e-08	1.39489e-08	3.56006e-09	1.24177e-08	7.50113e-09	4.52749e-09	1.22421e-08	1.58403e-08	4.22143e-09	1.07425e-08	5.68585e-09	8.9532e-09	8.39971e-09	2.3366e-08	1.70403e-08
1284.76	14.6612	6.62634e-07	5.64927e-07	5.59953e-07	5.62315e-07	5.5653e-07	5.57612e-07	5.46769e-07	5.43049e-07	5.27026e-07	5.30954e-07	5.38193e-07	5.48084e-07	5.53772e-07	5.53817e-07	5.84888e-07	3.72882e-07	1.1356e-07
1295.65	14.6497	1.50358e-06	1.19006e-06	1.18136e-06	1.1726e-06	1.15777e-06	1.16473e-06	1.17338e-06	1.15775e-06	1.18746e-06	1.17247e-06	1.17166e-06	1.19675e-06	1.14128e-06	1.03401e-06	6.54601e-07	-2.70759e-08	-5.8529e-07
1306.5	14.6907	3.85598e-07	3.52603e-07	3.32731e-07	3.33604e-07	3.33946e-07	3.51319e-07	3.42491e-07	3.41998e-07	3.40366e-07	3.41763e-07	3.42026e-07	3.51272e-07	3.32745e-07	3.1166e-07	3.28154e-07	3.35578e-07	2.90553e-07
1317.47	14.8011	6.16451e-06	5.54504e-06	5.52304e-06	5.49166e-06	5.49421e-06	5.4776e-06	5.43444e-06	5.39718e-06	5.3707e-06	5.31663e-06	5.28559e-06	5.19207e-06	5.03492e-06	4.84677e-06	4.78237e-06	5.01456e-06	5.50536e-06
1328.54	14.8526	5.27882e-07	4.40578e-07	4.57436e-07	4.43372e-07	4.36931e-07	4.35223e-07	4.29294e-07	4.33178e-07	4.45261e-07	4.18579e-07	3.91851e-07	4.00664e-07	3.58164e-07	3.22824e-07	3.6308e-07	3.75447e-07	2.39058e-07
1339.4	14.642	2.78078e-06	2.66871e-06	2.66363e-06	2.65797e-06	2.66446e-06	2.65576e-06	2.65038e-06	2.62863e-06	2.61855e-06	2.56735e-06	2.53145e-06	2.55773e-06	2.5207e-06	2.55329e-06	2.60956e-06	2.66436e-06	2.67644e-06
1350.04	14.7152	1.57843e-06	1.03679e-06	1.01438e-06	1.05074e-06	1.05013e-06	1.00633e-06	9.90221e-07	1.06267e-06	9.71712e-07	9.81599e-07	9.50271e-07	9.05472e-07	8.59952e-07	9.43742e-07	9.28233e-07	8.7055e-07	8.61836e-07
1361.33	15.4178	1.55437e-07	1.4694e-07	1.38881e-07	1.43148e-07	1.49258e-07	1.43309e-07	1.45719e-07	1.56534e-07	1.51575e-07	1.36814e-07	1.45133e-07	1.51334e-07	1.49032e-07	1.41691e-07	1.43042e-07	1.51953e-07	1.63677e-07
1373.13	14.528	4.87121e-07	5.64047e-07	5.66295e-07	5.87994e-07	6.07741e-07	6.32042e-07	5.78908e-07	5.99879e-07	6.57451e-07	5.81243e-07	5.7989e-07	6.22735e-07	6.32401e-07	5.59585e-07	6.1418e-07	6.44962e-07	7.01673e-07
1383.51	15.022	9.11125e-08	9.31234e-08	1.03819e-07	9.14681e-08	8.03058e-08	1.04673e-07	1.03245e-07	1.35707e-07	1.07579e-07	8.37965e-08	9.25799e-08	1.11676e-07	9.67724e-08	9.42043e-08	9.72453e-08	1.00159e-07	1.1514e-07
1394.92	14.3512	8.16275e-11	1.39745e-09	7.80342e-09	-8.43503e-10	5.75856e-09	7.01316e-09	3.80635e-09	3.13601e-08	9.42552e-09	2.37744e-09	1.6356e-08	5.64779e-09	5.09873e-09	2.57795e-09	8.08394e-09	8.28486e-09	-2.89409e-09
1405.76	14.603	-7.71123e-10	-7.78705e-10	-4.93394e-10	3.85721e-09	5.73336e-09	1.75726e-09	2.67461e-09	4.0295e-09	1.29968e-09	-1.75625e-09	-2.2292e-09	-1.84352e-09	-7.62197e-10	1.59106e-08	-4.85569e-10	-5.44992e-10	-5.59026e-09
1416.7	14.4414	4.31012e-08	2.02501e-10	1.2269e-10	8.90228e-09	-7.43797e-11	-5.28618e-10	1.95226e-08	9.56367e-10	-1.08072e-08	1.59569e-09	8.3686e-09	1.99374e-08	5.23049e-09	-3.58705e-09	5.77059e-10	5.74881e-09	-4.05767e-11
1427.45	14.3086	7.31586e-05	6.76394e-05	6.74625e-05	6.72842e-05	6.71174e-05	6.69658e-05	6.67909e-05	6.63766e-05	6.59774e-05	6.55973e-05	6.47585e-05	6.38758e-05	6.28093e-05	6.11882e-05	5.78361e-05	5.39025e-05	4.97994e-05
1438.5	14.7756	0.000244185	0.000204847	0.000203924	0.000203	0.000202048	0.000201159	0.000200203	0.000198345	0.000196441	0.000194529	0.000190757	0.00018684	0.000182503	0.000175797	0.000163695	0.000150387	0.000137654
1449.25	14.0094	3.74205e-05	3.15005e-05	3.13968e-05	3.12546e-05	3.11259e-05	3.09963e-05	3.08675e-05	3.06545e-05	3.04203e-05	3.01561e-05	2.976e-05	2.93908e-05	2.89122e-05	2.81259e-05	2.70956e-05	2.60318e-05	2.54156e-05
1459.41	13.9458	1.07893e-06	8.91137e-07	8.95744e-07	9.12462e-07	8.93822e-07	8.83015e-07	8.93632e-07	8.79048e-07	8.68061e-07	8.76786e-07	8.60329e-07	8.35846e-07	8.34534e-07	8.67242e-07	8.48573e-07	7.55626e-07	9.19763e-07
1470.03	14.5203	6.35864e-06	6.14463e-06	6.17297e-06	6.1689e-06	6.15349e-06	6.15277e-06	6.15746e-06	6.12603e-06	6.17543e-06	6.14098e-06	6.15887e-06	6.17469e-06	6.17928e-06	6.22021e-06	6.35616e-06	6.48619e-06	6.75673e-06
1480.99	14.3435	6.03892e-06	5.87174e-06	5.87585e-06	5.88346e-06	5.85604e-06	5.86346e-06	5.84904e-06	5.82262e-06	5.8732e-06	5.86586e-06	5.83782e-06	5.86558e-06	5.89616e-06	5.92691e-06	6.17833e-06	6.39626e-06	6.72932e-06
1491.53	14.1138	2.39174e-06	1.96101e-06	1.9487e-06	1.93066e-06	1.91443e-06	1.86733e-06	1.84222e-06	1.83412e-06	1.75757e-06	1.74991e-06	1.66153e-06	1.58917e-06	1.49974e-06	1.37695e-06	1.38425e-06	1.07431e-06	9.12124e-07
1502.1	14.2618	1.45623e-06	1.30787e-06	1.31471e-06	1.30995e-06	1.3211e-06	1.28608e-06	1.27134e-06	1.27241e-06	1.25497e-06	1.22296e-06	1.24168e-06	1.18606e-06	1.20128e-06	1.19583e-06	1.23779e-06	1.04175e-06	1.10664e-06
1512.73	14.1849	4.38218e-08	1.26093e-08	1.42691e-08	1.60076e-08	1.85115e-08	7.49519e-09	1.83078e-08	1.06768e-08	1.17904e-08	5.7502e-09	1.48266e-08	1.32761e-08	2.73608e-08	1.65594e-08	4.28282e-08	5.90216e-10	1.02468e-08
1523.31	14.1186	2.51745e-06	2.06156e-06	2.07125e-06	2.05117e-06	2.01214e-06	1.99132e-06	1.94311e-06	1.92145e-06	1.81506e-06	1.719e-06	1.72171e-06	1.66581e-06	1.54739e-06	1.51113e-06	1.35509e-06	3.78013e-07	2.4288e-07
1533.88	14.0897	2.99043e-05	2.66729e-05	2.65194e-05	2.63543e-05	2.62238e-05	2.60515e-05	2.58917e-05	2.5632e-05	2.53519e-05	2.51176e-05	2.48198e-05	2.46851e-05	2.37805e-05	2.2838e-05	2.18545e-05	1.81053e-05	1.84964e-05
1544.35	13.9804	1.65738e-05	1.48357e-05	1.47697e-05	1.4687e-05	1.45888e-05	1.45435e-05	1.44417e-05	1.43262e-05	1.4203e-05	1.40645e-05	1.38516e-05	1.37051e-05	1.32733e-05	1.27223e-05	1.24672e-05	1.04521e-05	1.03816e-05
1554.88	14.0528	3.27944e-07	3.01796e-07	2.5841e-07	2.91155e-07	2.75496e-07	2.63033e-07	2.98184e-07	3.05475e-07	2.88098e-07	2.99153e-07	2.31946e-07	2.68277e-07	2.68261e-07	2.84817e-07	1.47859e-07	1.59847e-07	1.92776e-07
1565.38	13.924	5.13754e-05	4.90744e-05	4.87516e-05	4.85104e-05	4.82476e-05	4.79591e-05	4.76947e-05	4.71393e-05	4.67457e-05	4.6321e-05	4.5611e-05	4.49131e-05	4.35793e-05	4.1615e-05	3.89074e-05	3.44856e-05	3.36798e-05
1575.67	13.7729	0.000196336	0.000198044	0.000196918	0.000195882	0.00019485	0.000193768	0.000192839	0.00019074	0.0001889	0.00018718	0.000184073	0.000181455	0.000176678	0.000169792	0.000159115	0.000139978	0.00012954
1585.92	13.7984	4.32342e-05	4.15458e-05	4.13001e-05	4.10438e-05	4.07768e-05	4.05947e-05	4.03574e-05	3.99095e-05	3.95257e-05	3.91442e-05	3.84108e-05	3.78226e-05	3.67267e-05	3.51816e-05	3.31644e-05	2.85008e-05	2.75547e-05
1596.24	13.7969	5.89278e-05	5.85121e-05	5.81775e-05	5.78951e-05	5.75901e-05	5.73198e-05	5.69849e-05	5.64663e-05	5.59471e-05	5.54422e-05	5.4595e-05	5.39349e-05	5.23394e-05	4.9977e-05	4.61144e-05	3.89553e-05	3.61452e-05
1606.5	13.7232	0.000188918	0.000194772	0.000193807	0.00019272	0.000191739	0.000190808	0.000189788	0.000187989	0.000186163	0.000184756	0.000181518	0.000178884	0.000174054	0.000166192	0.000155251	0.000134482	0.000123856
1616.86	13.8942	5.34201e-05	5.06393e-05	5.02442e-05	4.9934e-05	4.95823e-05	4.93559e-05	4.89392e-05	4.83692e-05	4.77704e-05	4.72972e-05	4.62711e-05	4.55149e-05	4.4138e-05	4.24518e-05	4.1267e-05	3.45736e-05	3.34462e-05
1627.04	13.4867	4.14295e-06	3.41905e-06	3.38089e-06	3.27361e-06	3.17644e-06	3.12351e-06	2.93747e-06	2.83998e-06	2.56184e-06	2.54012e-06	2.54147e-06	2.43661e-06	2.24046e-06	1.89621e-06	1.14706e-06	3.84561e-07	-1.63128e-07
1637.06	13.4903	1.61842e-05	1.44738e-05	1.43721e-05	1.42695e-05	1.42038e-05	1.41001e-05	1.40292e-05	1.382e-05	1.37303e-05	1.35907e-05	1.33494e-05	1.32447e-05	1.2752e-05	1.19877e-05	1.10996e-05	8.34819e-06	8.521e-06
1647.21	13.4457	3.13478e-05	2.85851e-05	2.84197e-05	2.82917e-05	2.81589e-05	2.80216e-05	2.79254e-05	2.77231e-05	2.75611e-05	2.7408e-05	2.72404e-05	2.72942e-05	2.63698e-05	2.52197e-05	2.41439e-05	2.04284e-05	2.22857e-05
1656.95	12.8478	7.79853e-06	6.8225e-06	6.68811e-06	6.67453e-06	6.59218e-06	6.5286e-06	6.60214e-06	6.47845e-06	6.40338e-06	6.36488e-06	6.3235e-06	6.36597e-06	6.08383e-06	5.59706e-06	5.68999e-06	4.83038e-06	5.53297e-06
1667.11	13.578	1.93143e-06	1.62146e-06	1.59177e-06	1.58728e-06	1.53275e-06	1.56365e-06	1.50225e-06	1.48823e-06	1.41329e-06	1.43183e-06	1.4199e-06	1.43849e-06	1.31988e-06	1.18119e-06	9.62814e-07	5.20319e-07	5.11792e-07
1677.32	13.0764	4.00245e-07	3.48633e-07	3.75388e-07	3.49569e-07	2.93831e-07	3.62029e-07	3.6268e-07	3.64289e-07	3.30796e-07	3.1973e-07	2.75592e-07	3.04521e-07	2.85529e-07	2.69549e-07	2.31425e-07	2.36385e-07	2.81615e-07
1687.34	13.101	1.38095e-07	1.16289e-07	9.19344e-08	9.44898e-08	7.4819e-08	8.23773e-08	1.27259e-07	1.01163e-07	7.304e-08	1.07791e-07	1.27396e-07	1.01332e-07	1.00465e-07	6.91503e-08	7.83615e-08	8.13918e-08	9.83928e-08
1697.21	13.2224	1.64978e-08	2.00882e-08	5.52253e-09	1.14543e-08	2.45091e-08	3.0584e-09	2.76977e-09	4.66158e-09	9.30957e-09	1.0276e-08	0	7.80362e-09	1.90504e-08	1.92684e-08	9.47562e-09	6.29728e-09	2.65819e-08
1707.02	13.2015	1.1803e-08	2.18159e-24	2.32691e-08	3.10956e-08	3.93655e-08	2.47738e-08	2.39271e-08	1.72684e-08	1.54996e-08	2.20464e-08	6.28241e-09	6.19573e-08	1.4918e-08	5.76417e-09	1.84533e-08	2.18535e-08	2.11528e-08
1716.81	12.9751	9.63651e-09	8.91588e-09	3.04938e-09	1.64086e-08	5.63407e-09	1.41196e-09	0	0	3.14153e-08	1.9547e-08	1.30689e-08	2.41133e-08	8.9678e-09	2.55601e-08	5.79459e-09	3.03891e-09	1.45261e-08
1726.58	12.8046	4.5421e-09	-2.70766e-09	-5.05495e-09	3.89604e-08	1.19817e-08	-1.08248e-24	3.48506e-09	6.51022e-09	-9.03208e-09	1.74807e-08	-4.56109e-09	1.3116e-08	5.67392e-09	0	1.69822e-09	9.38346e-09	1.40019e-08
1736.38	12.8313	0	1.09238e-08	-3.3881e-09	1.08362e-08	0	-4.64808e-25	0	1.05815e-08	1.21706e-08	0	0	4.04266e-08	0	-4.03327e-09	8.04123e-09	5.04427e-09	1.39797e-08
1746.1	13.0023	0	0	0	0	0	0	0	-1.51805e-09	0	0	0	0	0	-6.00423e-09	6.99908e-09	-1.38793e-09	-3.77247e-09
1755.77	13.0233	2.23741e-07	2.40141e-07	1.39874e-07	1.90605e-07	1.90334e-07	2.2558e-07	1.97691e-07	1.95113e-07	2.0786e-07	1.52137e-07	1.3991e-07	1.80681e-07	1.09004e-07	1.10174e-07	1.79312e-07	1.46298e-07	1.93054e-07
1765.44	12.6574	1.30088e-07	1.89514e-07	1.24506e-07	1.42128e-07	1.35655e-07	1.63152e-07	1.37259e-07	1.1855e-07	1.70378e-07	1.34997e-07	6.07441e-08	9.5003e-08	1.16957e-07	1.29921e-07	1.11975e-07	9.81034e-08	1.18672e-07
1775.04	12.4278	2.05313e-08	4.14474e-08	3.77644e-08	2.53204e-08	4.25902e-08	8.13415e-26	2.64291e-08	8.24132e-09	7.6763e-09	4.05558e-08	8.78101e-09	2.39668e-08	3.42492e-08	4.90478e-08	1.96217e-08	1.08357e-08	-1.48328e-08
1784.57	12.6008	1.69773e-07	8.63444e-08	1.22624e-07	9.20233e-08	8.34762e-08	9.8139e-08	1.71533e-07	1.29214e-07	9.34986e-08	1.50088e-07	1.06774e-07	6.66121e-08	2.06838e-07	7.62082e-08	1.29968e-07	1.60942e-07	1.70687e-07
1793.88	12.697	1.98891e-07	6.55543e-08	1.17828e-07	9.02464e-08	1.16105e-07	1.47661e-07	1.36477e-07	1.51652e-07	9.79227e-08	1.11338e-07	7.59436e-08	1.71107e-07	1.37012e-07	8.78711e-08	1.50886e-07	1.85458e-07	1.89222e-07
1803.51	12.5221	1.27459e-07	4.04488e-08	5.12967e-08	3.22089e-08	3.13142e-08	8.49699e-08	6.11362e-08	1.10722e-07	2.76491e-08	5.54954e-08	1.53386e-08	4.17484e-08	2.4048e-08	2.716e-08	4.80069e-08	5.3088e-08	3.75347e-08
1812.93	12.2902	7.11112e-09	3.16392e-08	9.88381e-09	5.90785e-09	8.54563e-09	2.66465e-08	2.19987e-08	3.53105e-08	-1.2812e-09	8.75914e-09	6.81812e-09	2.06878e-08	-4.96764e-10	1.3166e-08	1.21706e-08	7.29996e-09	-1.94177e-09
1822.29	12.8994	-2.39095e-09	-2.62055e-08	-3.19214e-08	-1.88363e-08	-2.98763e-08	-2.17093e-08	-1.57893e-08	-3.50413e-08	-3.32734e-08	-2.37875e-08	-1.83409e-08	-2.43216e-08	-3.03579e-08	-3.1923e-08	-3.49136e-08	-9.15242e-08	-6.96877e-08
1831.86	12.321	5.14118e-08	1.09071e-07	1.04304e-07	1.09336e-07	1.05453e-07	1.09644e-07	1.0577e-07	8.1711e-08	9.34836e-08	1.11089e-07	1.02874e-07	1.17138e-07	1.11769e-07	1.33087e-07	1.03549e-07	1.00389e-07	1.05647e-07
1841.17	12.4709	-2.4243e-08	-3.45112e-08	-3.45428e-08	-3.45763e-08	-3.46122e-08	-3.46503e-08	-3.46909e-08	-3.47799e-08	-3.48806e-08	-3.79196e-08	-3.66443e-08	-3.69978e-08	-3.44318e-08	-3.52396e-08	-3.72803e-08	-4.05195e-08	-2.19169e-08
1850.44	12.3586	-4.50309e-08	-7.01344e-08	-7.022e-08	-7.0311e-08	-7.04083e-08	-7.25501e-08	-7.26636e-08	-7.20352e-08	-7.23137e-08	-5.9136e-08	-7.33762e-08	-7.43141e-08	-7.42672e-08	-7.65332e-08	-8.21753e-08	-9.0895e-08	-7.91956e-08
1859.48	12.2035	-9.17341e-09	6.20232e-09	1.10478e-09	1.10618e-09	4.999e-10	-1.14862e-08	1.36001e-08	-8.52159e-09	-1.19133e-08	1.81233e-08	-4.24752e-09	-6.60851e-09	5.40811e-08	7.4049e-09	1.23296e-08	9.74419e-10	-1.63524e-08
1868.14	11.3546	2.05606e-06	3.34148e-06	3.34164e-06	3.3259e-06	3.35584e-06	3.32217e-06	3.40606e-06	3.41039e-06	3.37716e-06	3.38184e-06	3.44704e-06	3.4942e-06	3.5233e-06	3.63737e-06	3.87445e-06	4.27944e-06	4.54692e-06
1878.47	12.6107	5.38908e-05	4.08862e-05	4.08261e-05	4.07778e-05	4.07406e-05	4.06238e-05	4.06247e-05	4.04451e-05	4.03116e-05	4.00992e-05	3.98384e-05	3.93963e-05	3.9e-05	3.82729e-05	3.69866e-05	3.5556e-05	3.45902e-05
1886.94	11.5635	3.23792e-05	2.84617e-05	2.84343e-05	2.83966e-05	2.83779e-05	2.82976e-05	2.83398e-05	2.82527e-05	2.82437e-05	2.81828e-05	2.80398e-05	2.79202e-05	2.77634e-05	2.75293e-05	2.71944e-05	2.70093e-05	2.70595e-05
1895.88	11.5962	5.68509e-06	8.98241e-06	8.99442e-06	9.02914e-06	9.05423e-06	9.05703e-06	9.0739e-06	9.12402e-06	9.1864e-06	9.23539e-06	9.32242e-06	9.52406e-06	9.7192e-06	1.00095e-05	1.09266e-05	1.22886e-05	1.34986e-05
1904.73	12.5711	3.23896e-06	4.59403e-06	4.56899e-06	4.65411e-06	4.58661e-06	4.59023e-06	4.58525e-06	4.63623e-06	4.67542e-06	4.64391e-06	4.66481e-06	4.74909e-06	4.77596e-06	4.93048e-06	5.30973e-06	5.78451e-06	6.29483e-06
1914.15	11.7418	6.80224e-07	8.39289e-07	8.32193e-07	8.77914e-07	7.99679e-07	8.87068e-07	8.61075e-07	8.77324e-07	8.77952e-07	8.68346e-07	8.85587e-07	8.6358e-07	8.56651e-07	9.1338e-07	9.25178e-07	9.84515e-07	1.11805e-06
1923.18	12.0039	5.12025e-07	6.00813e-07	6.08069e-07	5.86168e-07	6.00666e-07	6.20666e-07	6.30651e-07	6.51894e-07	6.81199e-07	6.2812e-07	6.17517e-07	6.20599e-07	5.93785e-07	6.65717e-07	6.84019e-07	7.78218e-07	9.23304e-07
1932.06	11.6661	3.99728e-06	2.9234e-06	2.83135e-06	2.87931e-06	2.84217e-06	2.85873e-06	2.83142e-06	2.86721e-06	2.82358e-06	2.8033e-06	2.81032e-06	2.79645e-06	2.75673e-06	2.79893e-06	2.86548e-06	3.14579e-06	3.3263e-06
1940.92	11.8169	0.000197723	0.000131908	0.000130841	0.000129774	0.000128627	0.000127532	0.000126464	0.000124275	0.000122168	0.000120035	0.000115719	0.00011156	0.000107175	0.000100566	8.94499e-05	7.8704e-05	6.95093e-05
1949.71	11.5385	0.00087753	0.000680683	0.000676526	0.000672303	0.000668053	0.000663764	0.000659445	0.000650813	0.000642044	0.000633188	0.000615197	0.000596753	0.000577741	0.000547244	0.000489151	0.000428143	0.000369917
1958.44	11.4733	0.00127845	0.00103156	0.00102658	0.00102148	0.00101636	0.0010112	0.00100596	0.000995402	0.000984657	0.000973627	0.000951042	0.000927419	0.000902166	0.000860892	0.000779201	0.000688909	0.000604466
1967.13	11.5707	0.000971994	0.000815213	0.000810718	0.000806327	0.000801973	0.000797463	0.00079303	0.000784091	0.000775205	0.000766219	0.000748099	0.000729563	0.000710512	0.000680306	0.000622775	0.000561838	0.000501321
1975.83	11.4434	0.000262029	0.000242314	0.000240987	0.000239664	0.000238322	0.000237085	0.000235667	0.000233136	0.000230597	0.000228	0.000222783	0.000217782	0.000211458	0.000201434	0.000182106	0.00015799	0.000135303
1984.58	11.6345	4.81389e-05	4.2019e-05	4.1737e-05	4.15806e-05	4.1521e-05	4.12308e-05	4.12458e-05	4.05816e-05	4.05245e-05	4.04522e-05	4.0069e-05	3.99758e-05	3.91824e-05	3.78579e-05	3.66188e-05	3.24746e-05	3.40338e-05
1993.29	11.3157	0.000194253	0.000178914	0.00017832	0.000177561	0.000176956	0.000176388	0.000175679	0.000174469	0.000173254	0.000172089	0.000170034	0.000167818	0.000164616	0.000159546	0.000149627	0.000136884	0.000127973
2001.88	11.4422	0.00204503	0.00169573	0.00168778	0.00167976	0.00167161	0.00166337	0.00165505	0.00163811	0.0016207	0.00160289	0.00156562	0.00152605	0.00148566	0.00141859	0.00128144	0.00113281	0.00099247
2010.46	11.2577	0.0028161	0.00221702	0.00220403	0.00219093	0.00217766	0.00216432	0.0021508	0.00212358	0.00209571	0.00206723	0.00200852	0.00194643	0.00188603	0.00178688	0.00158791	0.00138407	0.00119048
2019.09	11.3366	0.00168251	0.00138185	0.00137447	0.00136708	0.00135957	0.00135207	0.00134446	0.00132919	0.00131379	0.00129796	0.00126558	0.00123181	0.00119855	0.00114409	0.00103497	0.000922068	0.000806561
2027.54	11.1218	0.000538725	0.000478983	0.000475984	0.000473142	0.000470385	0.000467621	0.000464822	0.000459239	0.000453764	0.00044829	0.000437371	0.00042635	0.000414373	0.000395893	0.000359911	0.000316954	0.000279447
2036.04	11.2636	0.000282631	0.000255064	0.000253778	0.000252194	0.00025072	0.000249204	0.000247889	0.000245109	0.00024266	0.000240402	0.000236431	0.000233492	0.000227032	0.000217919	0.00020532	0.000174285	0.000170738
2044.46	11.0174	0.0003955	0.000378984	0.000377315	0.000375135	0.000373343	0.000371604	0.000369833	0.000366087	0.00036216	0.000358653	0.000351833	0.000345787	0.000337593	0.000324314	0.000298816	0.000260774	0.000236011
2052.82	11.071	0.00102113	0.000914801	0.00091002	0.00090512	0.000900208	0.000895219	0.000890213	0.000879945	0.000869672	0.000858925	0.000836965	0.000813767	0.00079332	0.000759911	0.000689989	0.000624119	0.000551496
2061.17	10.9786	0.000769444	0.000699449	0.000695671	0.000692152	0.00068858	0.000684902	0.00068118	0.0006737	0.000666335	0.000658503	0.000642974	0.000626622	0.000611066	0.00058542	0.000532965	0.000478078	0.000420878
2069.56	11.1227	0.000778211	0.000693041	0.000689041	0.000685227	0.000681075	0.000677338	0.000673408	0.000665407	0.000657428	0.000649294	0.000632481	0.000615191	0.000599322	0.000573848	0.000522113	0.000467128	0.000412011
2077.8	10.9102	0.0004263	0.000396014	0.0003937	0.000391607	0.000389303	0.000387302	0.00038507	0.000381052	0.000377091	0.000373108	0.00036556	0.000358501	0.000348978	0.000334039	0.000307942	0.000267426	0.000242011
2086.15	11.0754	0.000295729	0.000267537	0.000265881	0.000264164	0.000262517	0.000260877	0.000259226	0.000255989	0.000253205	0.000250305	0.000245479	0.000241692	0.000233907	0.00022259	0.000205179	0.000172191	0.000163389
2094.44	10.8328	0.000134899	0.000117977	0.000116988	0.000116192	0.000115369	0.000114618	0.000113729	0.000112203	0.000110865	0.000109613	0.00010766	0.00010651	0.000102489	9.72251e-05	9.23219e-05	6.83215e-05	7.51327e-05
2102.57	10.8621	4.62888e-05	4.15647e-05	4.13044e-05	4.12102e-05	4.09799e-05	4.07906e-05	4.05848e-05	4.02089e-05	4.03915e-05	4.0134e-05	4.05584e-05	4.03536e-05	3.88195e-05	3.69799e-05	3.42074e-05	2.36666e-05	3.76195e-05
2110.82	10.851	2.72608e-05	2.39768e-05	2.38101e-05	2.36444e-05	2.36631e-05	2.34839e-05	2.33869e-05	2.33499e-05	2.31601e-05	2.27027e-05	2.25011e-05	2.26291e-05	2.21022e-05	2.09956e-05	1.65477e-05	1.08265e-05	1.36079e-05
2118.99	10.8112	1.22838e-05	1.0124e-05	1.00671e-05	9.66346e-06	9.54619e-06	9.23232e-06	9.06184e-06	8.94325e-06	8.50896e-06	8.16718e-06	7.63882e-06	7.46365e-06	6.61284e-06	5.6303e-06	4.45842e-06	-1.50528e-06	-2.90334e-06
2127.12	10.6388	2.70224e-06	2.45405e-06	2.25535e-06	2.23346e-06	2.1599e-06	1.95863e-06	1.93838e-06	1.93153e-06	1.86589e-06	1.87125e-06	1.73454e-06	1.676e-06	1.50242e-06	1.22449e-06	9.08579e-07	-1.08709e-06	-8.52593e-07
2135.24	10.7428	1.84319e-06	1.62641e-06	1.51016e-06	1.52438e-06	1.4847e-06	1.45134e-06	1.46113e-06	1.2924e-06	1.18438e-06	1.15343e-06	9.49476e-07	9.10089e-07	7.43102e-07	4.73406e-07	5.06006e-08	-1.73054e-06	-1.8056e-06
2143.22	10.5323	4.98612e-06	4.05829e-06	4.20771e-06	3.82372e-06	3.98197e-06	3.6754e-06	3.85461e-06	3.6547e-06	3.33681e-06	3.30317e-06	2.63262e-06	2.58056e-06	2.05363e-06	1.61826e-06	1.55397e-06	3.19243e-06	9.65772e-06
2151.13	10.577	1.66864e-05	1.45656e-05	1.44012e-05	1.41588e-05	1.41971e-05	1.38141e-05	1.37776e-05	1.35767e-05	1.3231e-05	1.29934e-05	1.23929e-05	1.20731e-05	1.2176e-05	1.27451e-05	1.64367e-05	1.66228e-05	2.51184e-05
2159.29	10.8203	1.16657e-05	9.93835e-06	9.76744e-06	9.60182e-06	9.66333e-06	9.42003e-06	9.05099e-06	8.85067e-06	8.53421e-06	8.39596e-06	7.90364e-06	7.51943e-06	6.77069e-06	5.63757e-06	3.63696e-06	5.42915e-06	1.43697e-05
2167.24	10.2622	9.6408e-06	8.58474e-06	8.43598e-06	8.43452e-06	8.01882e-06	8.0131e-06	8.01661e-06	7.45303e-06	7.50892e-06	7.12875e-06	6.66114e-06	6.53131e-06	5.89243e-06	4.87447e-06	2.80876e-06	-1.72058e-07	2.47018e-06
2175.09	10.6874	3.37976e-06	2.54335e-06	2.59783e-06	2.67126e-06	2.50078e-06	2.39637e-06	2.56131e-06	2.43325e-06	2.38328e-06	2.19826e-06	1.86782e-06	1.71479e-06	1.2646e-06	1.16416e-07	-1.54241e-06	-4.83168e-06	-7.99863e-06
2183.15	10.3148	7.35444e-07	5.83114e-07	6.00077e-07	5.90151e-07	3.78871e-07	4.9336e-07	4.57961e-07	7.28e-07	5.67353e-07	4.61329e-07	4.61028e-07	4.80864e-07	4.44349e-07	3.84319e-07	2.59023e-07	-9.1825e-08	-2.50588e-07
2190.83	10.3889	8.75153e-07	7.3331e-07	7.41991e-07	7.89385e-07	7.14477e-07	7.21074e-07	6.42507e-07	7.07934e-07	6.47155e-07	6.76866e-07	7.00324e-07	6.95342e-07	6.89797e-07	6.56571e-07	6.73069e-07	4.72212e-07	7.18019e-07
2198.86	10.5417	2.67554e-07	1.90257e-07	3.01702e-07	2.83324e-07	2.65601e-07	1.9531e-07	1.91475e-07	1.32101e-07	3.31643e-07	1.82288e-07	2.00184e-07	1.81255e-07	1.84548e-07	1.33399e-07	1.90026e-07	2.1931e-07	1.86645e-07
2206.59	10.1254	1.73213e-07	9.8355e-08	1.57144e-07	1.92123e-07	4.45867e-08	1.324e-07	8.35964e-08	9.45545e-08	9.31927e-08	1.25458e-07	9.88245e-08	1.31149e-07	1.25023e-07	8.79498e-08	1.29023e-07	1.1455e-07	2.46397e-07
2214.33	10.3834	2.59436e-07	1.82463e-07	2.26701e-07	3.47688e-07	2.58154e-07	2.78578e-07	2.32527e-07	2.59847e-07	2.91096e-07	2.38393e-07	2.47119e-07	2.52789e-07	2.36243e-07	2.29447e-07	2.34588e-07	9.67719e-08	2.13194e-07
2222.15	10.1301	1.35889e-07	2.32347e-08	2.45951e-07	1.37264e-07	2.97075e-08	2.32962e-07	1.85155e-07	1.19266e-07	3.34971e-07	1.60799e-07	1.69432e-07	1.57365e-07	1.70624e-07	1.51182e-07	1.85607e-07	1.27082e-07	2.31328e-07
2229.74	10.3142	2.7737e-08	1.70461e-07	1.98889e-07	1.29162e-07	2.29995e-07	1.58209e-07	3.74366e-08	1.11792e-07	1.4173e-07	1.06482e-07	1.03155e-07	7.63405e-08	8.96056e-08	1.01401e-07	6.22329e-08	3.18439e-08	4.68126e-08
2237.62	10.273	1.25348e-08	5.92072e-08	0	1.28399e-07	3.58083e-08	6.76932e-08	0	1.03759e-08	1.52873e-08	4.05099e-08	2.73283e-08	2.56238e-08	2.52207e-08	2.98688e-08	-3.25869e-09	2.40163e-08	1.35623e-08
2245.2	10.1004	3.40049e-08	2.88695e-08	1.26777e-07	5.54569e-08	3.03326e-08	9.36395e-08	1.979e-08	2.13788e-08	5.23419e-08	5.6679e-08	5.50102e-08	5.4171e-08	7.72477e-08	6.25929e-08	4.66951e-08	7.10412e-08	8.01147e-24
2252.83	10.165	1.27524e-07	1.64639e-07	1.3229e-07	2.08142e-07	2.08601e-07	1.70245e-07	2.47127e-07	1.66104e-07	1.64626e-07	1.58952e-07	1.53247e-07	1.61736e-07	1.4051e-07	1.50163e-07	1.11954e-07	3.02301e-07	1.07603e-07
2260.58	10.1894	1.17865e-07	1.08127e-07	9.67718e-08	1.79106e-07	1.05346e-07	1.86986e-07	3.02361e-07	1.06867e-07	1.09554e-07	1.03584e-07	1.22676e-07	1.04158e-07	1.03559e-07	1.41042e-07	7.85303e-08	1.3822e-07	7.44435e-08
2268.02	9.94387	6.175e-08	-3.59122e-08	5.42659e-08	9.58328e-09	2.62202e-09	1.61941e-08	2.30624e-08	3.23813e-08	2.47908e-08	3.07769e-08	1.34936e-08	2.52802e-08	5.60278e-08	2.06281e-08	1.59001e-08	1.08627e-07	1.36978e-08
2275.74	10.1886	1.35892e-08	8.18748e-24	2.09882e-08	7.42222e-08	1.91946e-08	2.28407e-08	1.91003e-08	6.14096e-08	5.81949e-08	3.30802e-08	5.00155e-08	4.09557e-08	6.86806e-08	5.09584e-08	2.80461e-08	9.45645e-08	2.34708e-08
2283.2	9.78521	0	0	9.79474e-09	6.70397e-08	1.67976e-08	2.37463e-08	1.35812e-08	3.9376e-08	2.92131e-08	1.75541e-08	4.82304e-08	2.25876e-08	3.9992e-08	2.50877e-08	-3.15551e-09	4.28712e-08	-1.94754e-08
2290.54	10.0038	0	2.41679e-24	9.92331e-09	1.16576e-08	6.16202e-09	0	0	8.15769e-09	0	8.86033e-09	2.69893e-08	1.03109e-08	1.51599e-08	4.00033e-08	9.21716e-09	5.16681e-08	2.60533e-09
2298.27	9.97127	0	5.79117e-09	9.46565e-09	1.87795e-09	1.00406e-08	0	0	3.82969e-09	0	1.00588e-08	6.80566e-09	0	1.10947e-08	2.36198e-08	8.56605e-08	3.74717e-23	1.11589e-08
2305.44	9.63447	0	0	0	2.38993e-08	0	1.05008e-08	6.34313e-09	-1.54362e-09	1.22177e-08	3.40173e-09	0	0	1.21387e-08	3.80515e-09	2.13546e-08	6.88846e-09	-2.00766e-08
2312.87	10.1359	0	0	1.8818e-25	5.35544e-08	0	0	3.32521e-08	6.89276e-09	1.073e-08	2.96489e-09	1.12215e-08	0	0	-1.1629e-08	1.66919e-08	-2.19138e-08	-3.84184e-09
2320.56	9.74905	0	0	-4.88934e-09	0	2.01637e-08	4.26846e-09	4.97958e-09	0	2.85276e-09	4.40644e-09	0	1.70842e-08	0	0	0	0	3.14176e-09
2327.54	9.65826	0	0	0	0	6.47208e-09	-4.00009e-09	5.62969e-25	5.05947e-09	0	0	0	-7.59029e-09	0	0	0	0	1.13764e-08
2335.15	10.0542	0	0	0	-4.23746e-09	0	-5.02529e-09	1.80428e-24	0	-5.0634e-09	-2.69712e-09	0	0	0	-1.0596e-08	0	0	9.75757e-09
2342.53	9.56876	0	0	0	-1.00925e-08	0	2.43796e-08	-1.69805e-25	1.45257e-08	0	1.59736e-08	1.6961e-08	0	0	-1.22569e-08	0	0	1.57141e-08
2349.51	9.55708	0	0	1.19603e-08	-2.53835e-09	8.85119e-09	7.27614e-09	1.22976e-24	0	0	-5.30417e-09	0	0	0	5.41358e-09	0	0	8.04511e-09
2356.96	9.92805	0	0	0	0	8.65847e-09	3.75631e-09	0	0	1.45533e-09	0	0	0	0	2.08885e-08	0	7.59866e-08	8.15715e-09
2364.29	9.46855	0	0	0	0	0	0	0	2.54886e-09	3.77069e-24	0	0	0	1.96498e-09	0	0	0	-9.27431e-09
2371.27	9.49267	0	-4.10483e-09	1.81959e-08	7.38625e-09	0	0	0	0	0	-6.65236e-25	-1.9219e-08	0	4.13098e-08	0	2.22528e-24	0	1.11914e-08
2378.44	9.61255	0	-1.10078e-08	1.60004e-08	-9.77541e-09	0	0	0	1.50799e-08	0	1.13565e-08	0	0	8.82163e-24	0	3.20996e-08	0	4.12646e-09
2385.73	9.63909	0	0	-7.54146e-10	-3.27085e-10	0	1.56824e-08	-5.5253e-09	0	0	0	1.66732e-24	1.16055e-08	1.7287e-09	0	2.09425e-08	0	-1.35913e-08
2392.76	9.29032	0	0	0	-9.73788e-09	0	5.3073e-09	-9.74205e-09	0	1.56622e-08	0	-6.50417e-26	0	-2.51932e-08	2.04125e-08	-4.91334e-08	0	-6.35314e-09
2399.73	9.60672	0	4.89436e-09	5.03256e-09	0	0	8.22086e-09	-3.10316e-09	0	7.94532e-09	0	0	0	0	1.23617e-08	0	0	3.75254e-08
2407.24	9.64439	0	5.50125e-09	7.82088e-24	0	1.04407e-08	0	0	0	4.42317e-24	0	4.4387e-09	0	0	0	0	-9.91194e-09	-1.09064e-09
2414.09	8.96147	0	0	0	3.49055e-09	3.47889e-09	2.20888e-08	0	3.8861e-09	4.44859e-24	0	5.08052e-09	0	3.03651e-08	3.81274e-08	6.61844e-08	-1.88829e-08	-1.42036e-08
2420.91	9.61238	4.87941e-09	2.9712e-09	0	1.12286e-08	0	6.27024e-24	0	0	0	1.46626e-08	0	6.28869e-09	0	0	0	3.83905e-09	-5.29003e-09
2428.33	9.44559	3.35548e-09	0	5.46846e-09	9.95447e-09	0	2.89895e-09	0	5.38589e-09	5.04704e-09	2.33751e-08	0	3.54105e-09	1.08933e-08	1.87942e-08	0	0	-9.46751e-10
2435.22	9.3097	8.55455e-09	4.31201e-09	7.68552e-09	3.40905e-09	0	0	0	0	0	0	1.48436e-08	9.8194e-09	0	0	0	-8.31472e-09	-4.38448e-09
2442.07	8.81877	0	4.85631e-09	0	6.66074e-09	0	0	1.6942e-08	1.29949e-08	0	0	2.46054e-08	6.79914e-09	0	0	0	2.49112e-08	-5.88457e-09
2448.81	9.38408	1.06145e-08	3.28901e-08	0	0	0	0	1.00881e-08	0	1.68733e-08	0	1.97719e-08	2.24506e-08	0	1.49242e-08	0	0	-8.23478e-09
2456.2	9.35962	0	2.48307e-08	1.58637e-08	1.21337e-08	1.16754e-08	1.71904e-08	3.12483e-09	2.36856e-08	0	1.40442e-08	0	1.87953e-08	0	0	5.71387e-08	0	1.94316e-08
2462.72	8.86375	0	1.23451e-08	1.30274e-08	7.75263e-09	1.17917e-08	7.27413e-09	1.77082e-08	2.44481e-08	6.45787e-09	2.63733e-08	0	2.5112e-08	1.57084e-08	3.60697e-08	3.29016e-08	7.71767e-09	2.94176e-08
2469.32	9.10723	2.28619e-09	9.91273e-08	3.74243e-08	2.01166e-08	3.57529e-08	9.60245e-08	8.83886e-08	1.21303e-07	3.83499e-08	8.39124e-08	6.65531e-08	8.08543e-08	4.22736e-08	4.6321e-08	4.07286e-09	2.08824e-08	7.5281e-08
2476.64	9.57509	9.99724e-08	3.24704e-08	4.37091e-08	3.33533e-08	3.91694e-08	1.05365e-08	2.15852e-08	3.839e-08	7.91116e-10	3.92679e-08	6.11547e-08	3.84147e-08	4.31078e-08	1.80293e-09	3.28754e-09	5.88099e-08	5.28202e-08
2483.46	8.89409	3.43354e-06	3.23112e-06	3.22464e-06	3.19525e-06	3.18691e-06	3.19461e-06	3.22679e-06	3.20484e-06	3.18622e-06	3.26188e-06	3.22233e-06	3.22325e-06	3.24712e-06	3.30073e-06	3.57014e-06	4.41684e-06	5.49939e-06
2489.9	8.98538	3.952e-06	3.53671e-06	3.55228e-06	3.50493e-06	3.48209e-06	3.48169e-06	3.49844e-06	3.4896e-06	3.50295e-06	3.50018e-06	3.48009e-06	3.50343e-06	3.56787e-06	3.537e-06	3.82424e-06	4.54507e-06	5.50297e-06
2496.76	9.439	1.74216e-06	1.6126e-06	1.62772e-06	1.59372e-06	1.61559e-06	1.56517e-06	1.57161e-06	1.57724e-06	1.59167e-06	1.56746e-06	1.5752e-06	1.49677e-06	1.50235e-06	1.4803e-06	1.58603e-06	1.59031e-06	1.67587e-06
