# Supplementary material for: Towards global carbon transparency: Spaceborne imaging spectroscopy enables precise CO2 emission quantification at facility scale
Source: Research Square preprint supplement (doi:10.21203/rs.3.rs-5913782/v1), 2025-01-29
Supplement: Supplementary file 18 [file CO2_k_v25.1.2.xlsx]

## Sheet: k_ZY1E
Wavelength	FWHM	k_Summer_L	k_Summer_M	k_Summer_H	k_Winter_L	k_Winter_M	k_Winter_H	k_1976_L	k_1976_M	k_1976_H
1005.6	16.26	0	0	0	0	0	0	0	0	0	0	0	0	0	0	0	0	0
1022.21	16.26	0	0	0	0	0	0	0	0	0	0	0	0	0	0	0	0	0
1039.19	16.26	3.83269e-07	3.49166e-07	3.11054e-07	3.21917e-07	3.1694e-07	3.1316e-07	2.74261e-07	2.88385e-07	3.13204e-07	3.3164e-07	3.00081e-07	3.01516e-07	2.9545e-07	2.85758e-07	2.80892e-07	2.48143e-07	2.62691e-07
1055.87	16.26	7.50201e-07	6.47481e-07	6.45793e-07	6.40252e-07	6.00919e-07	6.18756e-07	5.86858e-07	5.95708e-07	5.21499e-07	4.60261e-07	3.73995e-07	3.15792e-07	2.37346e-07	1.07097e-07	-9.80851e-08	-3.59461e-07	-4.97318e-07
1072.55	16.26	7.7409e-08	8.31068e-08	1.10133e-07	5.83755e-08	7.78713e-08	9.82808e-08	6.7373e-08	9.87671e-08	5.06494e-08	8.72776e-08	7.53148e-08	7.46092e-08	7.42379e-08	7.50933e-08	6.93001e-08	7.3122e-08	6.7993e-08
1089.23	16.26	0	0	0	7.30956e-09	0	8.24133e-10	2.44087e-09	3.36382e-10	0	2.1296e-09	2.83522e-09	3.86728e-09	-1.72217e-09	-1.24721e-09	-7.99528e-10	-6.9154e-10	-5.48231e-10
1105.91	16.26	0	1.3808e-10	2.99165e-10	-8.22701e-11	-2.19103e-25	3.16513e-10	0	1.09894e-09	1.09906e-09	0	9.56754e-10	7.32156e-11	1.60093e-09	5.54903e-10	-5.97119e-10	0	1.61195e-10
1122.59	16.26	2.79602e-09	1.48995e-09	1.3398e-09	1.38929e-09	6.58798e-10	7.53802e-10	1.77711e-10	1.8539e-10	5.91384e-10	2.2021e-10	-1.05794e-25	-1.95976e-09	8.76364e-10	5.74596e-09	-3.95216e-09	-3.60988e-09	0
1139.44	16.26	0	1.0765e-09	4.5523e-10	-7.19646e-10	0	-6.40443e-10	0	0	2.22679e-09	5.51127e-10	0	0	-1.08586e-09	-4.48561e-09	1.32201e-09	1.23985e-09	1.42427e-09
1156.41	16.26	0	0	-6.54104e-10	0	0	0	0	-8.58443e-10	1.47873e-09	0	0	-1.48076e-10	-2.66136e-09	0	0	0	1.86994e-09
1173.29	16.26	0	0	0	0	0	0	0	0	0	0	0	0	0	0	0	-8.54051e-25	-5.90982e-09
1190.17	16.26	0	0	1.37838e-09	6.26611e-10	0	0	-6.35873e-10	0	1.63925e-09	8.53753e-10	0	0	-4.97996e-10	0	0	2.07602e-09	1.92184e-09
1207.04	16.26	2.53843e-05	2.38112e-05	2.36938e-05	2.35911e-05	2.35162e-05	2.34027e-05	2.33127e-05	2.31473e-05	2.2993e-05	2.28397e-05	2.26124e-05	2.25075e-05	2.19726e-05	2.13807e-05	2.10748e-05	1.92516e-05	1.92186e-05
1223.92	16.26	1.75056e-05	1.61561e-05	1.60678e-05	1.59931e-05	1.59248e-05	1.58546e-05	1.57887e-05	1.56568e-05	1.552e-05	1.54341e-05	1.53148e-05	1.52855e-05	1.48914e-05	1.44601e-05	1.42076e-05	1.2607e-05	1.29699e-05
1240.8	16.26	5.39515e-07	5.05604e-07	5.00175e-07	4.94774e-07	4.84962e-07	4.96554e-07	4.83854e-07	4.76557e-07	4.78056e-07	4.76441e-07	4.70845e-07	4.57077e-07	4.58027e-07	4.47396e-07	4.2248e-07	3.97709e-07	4.14076e-07
1257.4	16.26	2.65835e-07	2.04191e-07	1.97115e-07	2.04883e-07	2.1333e-07	2.0305e-07	1.99899e-07	2.00164e-07	1.97132e-07	1.94607e-07	2.00364e-07	1.95572e-07	1.86753e-07	1.79063e-07	2.00165e-07	1.74543e-07	1.65343e-07
1274.15	16.26	1.33133e-08	1.30983e-08	1.55004e-08	1.24952e-08	1.31966e-08	8.81007e-09	1.57914e-08	1.27037e-08	1.21029e-08	2.20632e-08	1.15853e-08	1.04625e-08	6.45399e-09	1.0747e-08	1.93802e-08	2.48791e-08	2.02074e-08
1290.9	16.26	1.4857e-06	1.24886e-06	1.24914e-06	1.23498e-06	1.22082e-06	1.22739e-06	1.25427e-06	1.23175e-06	1.266e-06	1.24478e-06	1.29792e-06	1.31146e-06	1.31821e-06	1.1889e-06	8.11236e-07	-9.24255e-08	-1.07708e-06
1307.65	16.26	1.52824e-06	1.43838e-06	1.43536e-06	1.42882e-06	1.43683e-06	1.43199e-06	1.42671e-06	1.42132e-06	1.40889e-06	1.40219e-06	1.39158e-06	1.3961e-06	1.34544e-06	1.29377e-06	1.31611e-06	1.46793e-06	1.70609e-06
1324.4	16.26	2.76911e-06	2.71025e-06	2.71033e-06	2.69948e-06	2.70042e-06	2.68739e-06	2.69957e-06	2.68076e-06	2.67909e-06	2.66494e-06	2.63197e-06	2.59652e-06	2.51888e-06	2.4567e-06	2.57322e-06	2.84379e-06	3.23177e-06
1341.16	16.26	2.85341e-06	2.91166e-06	2.91266e-06	2.9272e-06	2.91098e-06	2.89626e-06	2.89431e-06	2.87366e-06	2.85101e-06	2.82312e-06	2.79294e-06	2.83856e-06	2.79486e-06	2.85142e-06	2.97897e-06	3.07432e-06	3.20943e-06
1357.91	16.26	1.64565e-07	1.62303e-07	1.2778e-07	1.56212e-07	1.39103e-07	2.02145e-07	1.55109e-07	1.37466e-07	1.27865e-07	1.69689e-07	1.3421e-07	1.39462e-07	1.30508e-07	1.21626e-07	1.49019e-07	1.44356e-07	1.47706e-07
1374.87	16.26	3.89502e-07	5.062e-07	5.18795e-07	5.38382e-07	5.38936e-07	5.21106e-07	5.42898e-07	5.2028e-07	5.14966e-07	4.83012e-07	5.71121e-07	5.25512e-07	5.75191e-07	5.34348e-07	5.59386e-07	6.05173e-07	6.40193e-07
1391.65	16.26	2.22486e-08	-1.4586e-09	5.86177e-09	1.19514e-08	5.58351e-09	3.9115e-09	3.4759e-08	1.45067e-08	8.37029e-09	4.4685e-09	4.48293e-09	3.60958e-08	2.90347e-09	3.20475e-08	9.26599e-09	1.51015e-08	8.12611e-09
1408.49	16.26	-1.89412e-10	-8.95425e-10	-5.41279e-10	-2.18922e-09	-1.52192e-09	3.49741e-11	-9.02821e-09	-4.60792e-09	-9.54321e-10	-1.49615e-08	-4.86084e-09	-1.13045e-09	-5.16042e-09	-1.12702e-09	-3.40044e-09	-7.7632e-09	-2.70509e-09
1425.33	16.26	5.39369e-05	4.99019e-05	4.96875e-05	4.94778e-05	4.9274e-05	4.90773e-05	4.88766e-05	4.84304e-05	4.8005e-05	4.75901e-05	4.67121e-05	4.57455e-05	4.47432e-05	4.30922e-05	4.00083e-05	3.65363e-05	3.29947e-05
1442.17	16.26	0.000156785	0.000142411	0.000141864	0.000141328	0.000140801	0.00014021	0.000139646	0.000138542	0.000137474	0.000136316	0.000134206	0.00013211	0.000129378	0.0001252	0.000118065	0.000109883	0.000102315
1459.01	16.26	1.4281e-06	1.3691e-06	1.37639e-06	1.40154e-06	1.37724e-06	1.35833e-06	1.37407e-06	1.3647e-06	1.37123e-06	1.3653e-06	1.35929e-06	1.39042e-06	1.40762e-06	1.41951e-06	1.42218e-06	1.61229e-06	1.63366e-06
1475.85	16.26	9.35782e-06	9.66846e-06	9.6456e-06	9.65237e-06	9.64035e-06	9.65636e-06	9.64494e-06	9.65947e-06	9.71969e-06	9.72995e-06	9.78489e-06	9.87584e-06	9.97052e-06	1.02394e-05	1.08837e-05	1.1329e-05	1.21249e-05
1492.7	16.26	2.44302e-06	2.18291e-06	2.18596e-06	2.17417e-06	2.12765e-06	2.07531e-06	2.06862e-06	2.06458e-06	1.91876e-06	1.88637e-06	1.78112e-06	1.68671e-06	1.61717e-06	1.51508e-06	1.47772e-06	1.12983e-06	8.00328e-07
1509.54	16.26	5.68515e-08	7.15261e-08	5.79011e-08	7.09218e-08	7.05592e-08	7.98718e-08	7.32953e-08	5.86598e-08	5.85668e-08	9.57846e-08	7.17064e-08	9.46737e-08	8.4982e-08	7.77912e-08	1.05695e-07	1.01619e-07	1.11817e-07
1526.38	16.26	9.18237e-06	8.41417e-06	8.33232e-06	8.25711e-06	8.24301e-06	8.14417e-06	8.03545e-06	7.9451e-06	7.74022e-06	7.58868e-06	7.56407e-06	7.5641e-06	7.15548e-06	7.00364e-06	6.75475e-06	3.93517e-06	4.24138e-06
1543.22	16.26	2.0588e-05	1.97002e-05	1.96317e-05	1.95346e-05	1.94307e-05	1.93632e-05	1.92735e-05	1.91246e-05	1.90022e-05	1.89649e-05	1.88103e-05	1.88741e-05	1.82673e-05	1.75847e-05	1.7733e-05	1.44279e-05	1.5244e-05
1560.06	16.26	1.65304e-06	1.47641e-06	1.47067e-06	1.44039e-06	1.4378e-06	1.4152e-06	1.39277e-06	1.37336e-06	1.4081e-06	1.43127e-06	1.48838e-06	1.45972e-06	1.36197e-06	1.14794e-06	1.2057e-06	1.22739e-06	2.4533e-06
1576.9	16.26	0.000179123	0.00020558	0.000204492	0.000203511	0.000202559	0.000201576	0.000200733	0.000198893	0.00019741	0.000196065	0.000193815	0.000192355	0.00018759	0.000181112	0.000172246	0.000150154	0.000142017
1593.71	16.26	3.33578e-05	3.61735e-05	3.5982e-05	3.58444e-05	3.5688e-05	3.54933e-05	3.53327e-05	3.5087e-05	3.48699e-05	3.46748e-05	3.44453e-05	3.44475e-05	3.3366e-05	3.18066e-05	2.98262e-05	2.40089e-05	2.32757e-05
1610.39	16.26	0.000139852	0.00016267	0.000161897	0.000160988	0.000160214	0.000159584	0.000158774	0.000157521	0.000156298	0.00015558	0.000153695	0.000152578	0.000148621	0.000142448	0.000136958	0.000115622	0.000110188
1627.13	16.26	4.723e-06	4.06377e-06	4.00884e-06	3.89086e-06	3.74009e-06	3.73417e-06	3.44561e-06	3.29333e-06	2.91451e-06	2.89554e-06	2.74061e-06	2.59033e-06	2.23597e-06	1.61779e-06	5.97694e-07	-8.86382e-07	-1.70377e-06
1644.01	16.26	3.02337e-05	2.90145e-05	2.88491e-05	2.86847e-05	2.85706e-05	2.84311e-05	2.82885e-05	2.81242e-05	2.80148e-05	2.79379e-05	2.79586e-05	2.83638e-05	2.74435e-05	2.63546e-05	2.59428e-05	2.09044e-05	2.49132e-05
1660.89	16.26	4.00459e-06	3.64738e-06	3.54872e-06	3.51044e-06	3.4098e-06	3.37873e-06	3.45582e-06	3.29878e-06	3.27955e-06	3.23285e-06	3.26557e-06	3.36746e-06	3.20933e-06	2.68616e-06	2.80059e-06	2.083e-06	2.74255e-06
1677.77	16.26	4.19619e-07	3.66116e-07	3.78055e-07	3.72095e-07	3.68124e-07	3.65129e-07	3.89879e-07	3.49943e-07	3.49921e-07	3.54787e-07	3.66052e-07	3.55996e-07	3.48664e-07	3.85087e-07	3.43709e-07	2.45905e-07	3.25857e-07
1694.65	16.26	2.45462e-08	1.6948e-08	6.00848e-09	1.80595e-08	2.40535e-08	1.96707e-08	3.63317e-08	3.56114e-08	3.51134e-08	3.64953e-08	5.89694e-08	2.69646e-08	1.78945e-08	1.76093e-08	2.20837e-08	2.09798e-08	2.41489e-08
1711.53	16.26	1.84475e-08	1.60671e-08	2.46499e-08	2.64104e-08	6.91229e-09	3.37656e-08	1.53105e-08	3.72638e-08	1.85894e-08	6.18788e-09	1.66551e-08	2.97336e-08	4.55712e-08	2.34475e-08	1.76551e-08	7.38266e-09	1.30114e-08
1728.41	16.26	7.08418e-09	7.86284e-09	1.62292e-09	9.01289e-09	1.34684e-08	1.41959e-08	0	0	1.37586e-08	1.53888e-08	0	2.96208e-09	8.22426e-09	5.0803e-09	2.65256e-08	8.40979e-09	2.44314e-09
1745.28	16.26	0	0	3.66685e-09	1.53389e-09	5.11425e-09	0	4.67859e-09	-1.01113e-08	0	-8.09021e-09	2.64845e-09	6.83451e-09	-1.08966e-08	-3.36575e-24	-1.50367e-08	-1.12484e-08	1.14901e-08
1762.16	16.26	2.19444e-07	2.15409e-07	2.08401e-07	1.66886e-07	1.89112e-07	2.16145e-07	1.95205e-07	1.71758e-07	1.85848e-07	1.79636e-07	2.18442e-07	1.7585e-07	1.97553e-07	1.97865e-07	2.24424e-07	1.93994e-07	2.32521e-07
1778.85	16.26	3.29665e-08	5.84467e-08	5.37626e-08	2.80957e-08	5.1941e-08	4.01259e-08	3.93126e-08	4.39607e-08	1.47712e-08	4.54134e-08	3.88575e-08	3.9818e-08	2.08513e-08	3.48303e-08	2.91063e-08	4.30987e-08	4.68894e-08
1795.43	16.26	1.33464e-07	1.49478e-07	1.64734e-07	1.82689e-07	1.04143e-07	1.47777e-07	1.53468e-07	1.59757e-07	1.31998e-07	1.21344e-07	1.20033e-07	1.35795e-07	1.41035e-07	1.3507e-07	1.43866e-07	1.87143e-07	2.22392e-07
1812.02	16.26	3.19418e-08	1.78486e-08	2.17612e-08	1.66366e-08	2.58643e-08	1.23787e-08	5.34039e-09	7.91077e-09	1.39821e-09	3.08345e-09	5.81811e-09	2.00527e-08	1.39508e-08	1.87207e-08	2.47341e-08	1.59023e-09	2.6347e-08
1828.82	16.26	9.17645e-09	5.76169e-08	6.4879e-08	8.56995e-08	7.04763e-08	5.13843e-08	8.98227e-08	6.42692e-08	5.66362e-08	6.43023e-08	7.19634e-08	5.89631e-08	6.82415e-08	7.35603e-08	7.00689e-08	6.67133e-08	9.27063e-08
1845.62	16.26	-1.22501e-08	-2.82537e-08	-2.8296e-08	-2.83405e-08	-4.65415e-08	-2.99537e-08	-3.00084e-08	-2.94725e-08	-2.96001e-08	-3.17197e-08	-5.07252e-08	-3.24864e-08	-3.00272e-08	-5.21084e-08	-3.31606e-08	-3.65803e-08	-3.98149e-08
1862.42	16.26	2.73276e-07	5.76613e-07	5.7898e-07	5.82356e-07	5.69439e-07	5.99228e-07	5.80255e-07	6.16744e-07	6.03065e-07	6.14796e-07	6.09482e-07	6.08965e-07	6.22173e-07	6.57902e-07	6.94324e-07	7.85393e-07	8.58077e-07
1880.13	16.26	4.842e-05	3.65167e-05	3.64293e-05	3.64132e-05	3.63327e-05	3.62255e-05	3.61565e-05	3.60294e-05	3.59252e-05	3.57025e-05	3.54067e-05	3.50724e-05	3.47277e-05	3.41513e-05	3.29679e-05	3.19339e-05	3.115e-05
1896.11	16.26	8.10213e-06	9.28931e-06	9.34906e-06	9.33141e-06	9.33604e-06	9.3574e-06	9.34473e-06	9.38533e-06	9.40903e-06	9.45753e-06	9.51306e-06	9.57701e-06	9.75298e-06	9.95548e-06	1.05002e-05	1.14901e-05	1.24124e-05
1912.97	16.26	9.14098e-07	1.92909e-06	1.93104e-06	1.96096e-06	1.9706e-06	1.9542e-06	2.01783e-06	1.98413e-06	1.96353e-06	1.97484e-06	2.04575e-06	2.11308e-06	2.12804e-06	2.23279e-06	2.40256e-06	2.85455e-06	2.98119e-06
1929.93	16.26	2.99799e-06	2.5013e-06	2.34944e-06	2.40878e-06	2.37512e-06	2.35495e-06	2.37413e-06	2.34755e-06	2.34136e-06	2.38261e-06	2.35081e-06	2.38575e-06	2.40799e-06	2.45885e-06	2.59908e-06	2.74389e-06	3.08965e-06
1946.82	16.26	0.000618572	0.000506401	0.000503443	0.000500329	0.000497384	0.000494248	0.000491247	0.000485059	0.000478837	0.000472593	0.000459872	0.000447155	0.000433644	0.000412392	0.000373164	0.000333955	0.000292945
1963.72	16.26	0.00103453	0.000928435	0.00092435	0.000920285	0.000916262	0.000912249	0.00090819	0.000900045	0.00089199	0.000883911	0.000867505	0.000850836	0.000832716	0.000804313	0.000750927	0.0006949	0.000634991
1980.61	16.26	0.000124679	0.000129607	0.000128986	0.000128328	0.000127951	0.000127236	0.000126678	0.000125472	0.000124596	0.000123661	0.000121713	0.00012023	0.000117328	0.000112412	0.000104225	8.94034e-05	8.0971e-05
1997.51	16.26	0.000544734	0.000499765	0.000499333	0.000498639	0.000498255	0.000497719	0.000497243	0.00049635	0.000495368	0.000494386	0.00049246	0.000490394	0.000487043	0.000481532	0.0004681	0.000450924	0.000435808
2014.4	16.26	0.0023404	0.00199087	0.0019817	0.00197239	0.00196288	0.00195347	0.00194392	0.00192445	0.00190465	0.00188422	0.00184181	0.0017967	0.00175378	0.00168252	0.0015355	0.00139725	0.00123607
2031.3	16.26	0.000387268	0.000377918	0.000375965	0.000373908	0.000372135	0.000370224	0.000368444	0.000364888	0.000361715	0.000358577	0.000353143	0.000348485	0.000339812	0.000327793	0.000309859	0.000270049	0.000260551
2048.13	16.26	0.000594589	0.000602627	0.000600227	0.000597513	0.000595273	0.000592922	0.000590562	0.000585546	0.000580459	0.00057541	0.000565773	0.000556529	0.00054593	0.000528993	0.000495248	0.00045131	0.000418759
2064.9	16.26	0.000784845	0.000769829	0.000766148	0.000762402	0.000758643	0.000755084	0.000751451	0.000743894	0.000736448	0.000728566	0.000712871	0.000696256	0.00068141	0.000656761	0.000607295	0.000557802	0.000506143
2081.61	16.26	0.000360144	0.000363914	0.000362054	0.000360118	0.000358165	0.000356389	0.000354665	0.000351435	0.000348692	0.000345835	0.000341349	0.000338625	0.000329557	0.000316209	0.000298238	0.000255905	0.000249948
2098.45	16.26	8.38661e-05	7.91627e-05	7.85939e-05	7.82121e-05	7.77625e-05	7.72954e-05	7.6856e-05	7.61399e-05	7.61359e-05	7.58809e-05	7.64141e-05	7.72394e-05	7.42657e-05	7.08917e-05	6.89588e-05	4.46138e-05	6.83005e-05
2115.29	16.26	2.05674e-05	1.84461e-05	1.8338e-05	1.78527e-05	1.7985e-05	1.73758e-05	1.72009e-05	1.71675e-05	1.6751e-05	1.60523e-05	1.57499e-05	1.5902e-05	1.51337e-05	1.39524e-05	1.05647e-05	1.2799e-06	-3.36718e-07
2132.13	16.26	2.1418e-06	1.95553e-06	1.8956e-06	1.81488e-06	1.76364e-06	1.62731e-06	1.62188e-06	1.5553e-06	1.52006e-06	1.54497e-06	1.58311e-06	1.48061e-06	1.24211e-06	1.02661e-06	8.31129e-07	-1.51588e-06	-8.43392e-07
2148.97	16.26	1.26302e-05	1.11741e-05	1.10795e-05	1.07113e-05	1.07715e-05	1.04475e-05	1.03404e-05	9.94696e-06	9.61977e-06	9.34969e-06	8.64199e-06	8.47521e-06	8.48938e-06	9.59629e-06	1.52292e-05	1.55519e-05	2.76821e-05
2165.81	16.26	1.05849e-05	9.21446e-06	9.09965e-06	9.06238e-06	8.7077e-06	8.55762e-06	8.36439e-06	8.16241e-06	7.79432e-06	7.5744e-06	6.77342e-06	6.55361e-06	5.42716e-06	3.36161e-06	-1.67968e-07	5.26485e-07	1.14095e-05
2182.64	16.26	1.07888e-06	8.85288e-07	8.14559e-07	8.70322e-07	8.21232e-07	8.23039e-07	7.86542e-07	7.85796e-07	7.99054e-07	7.436e-07	7.51474e-07	6.84885e-07	7.04565e-07	6.17164e-07	5.28276e-07	-2.55136e-07	1.43555e-08
2199.48	16.26	2.63877e-07	3.30948e-07	2.11631e-07	2.26599e-07	2.22771e-07	2.11912e-07	2.68696e-07	1.88385e-07	2.46103e-07	2.74436e-07	2.02137e-07	1.77901e-07	2.41329e-07	2.45466e-07	2.80154e-07	2.06397e-07	4.18932e-07
2216.32	16.26	2.36974e-07	1.63297e-07	2.78512e-07	1.5453e-07	2.95799e-07	2.4788e-07	2.86977e-07	1.77766e-07	2.4357e-07	2.54547e-07	2.57953e-07	2.56807e-07	2.34671e-07	2.22193e-07	2.14617e-07	1.20941e-07	2.30834e-07
2233.16	16.26	7.73019e-08	1.44773e-07	1.00482e-07	6.32478e-08	1.09219e-07	1.95937e-08	7.71215e-08	8.4252e-08	7.22427e-08	2.63305e-08	9.94442e-08	7.50556e-08	7.0187e-08	8.39649e-08	7.20364e-08	2.07206e-08	7.97796e-08
2250	16.26	1.59429e-07	5.16105e-24	7.48015e-08	1.48355e-07	2.11451e-07	1.15946e-07	1.53107e-07	2.50266e-07	1.39255e-07	1.20892e-07	7.34572e-08	1.31302e-07	1.16445e-07	1.33764e-07	1.34753e-07	7.90498e-08	5.05551e-08
2266.84	16.26	8.90576e-08	1.59607e-07	1.12941e-07	4.95567e-08	3.35348e-08	4.38031e-08	1.0146e-07	1.84923e-08	1.16654e-07	2.60206e-08	6.13639e-08	5.00172e-08	5.4972e-08	5.37842e-08	5.60521e-08	5.65261e-08	2.33809e-08
2283.67	16.26	5.24739e-08	4.40807e-08	1.21816e-08	2.202e-08	4.77882e-08	5.93772e-08	3.14362e-08	3.38159e-09	6.23997e-08	-1.36078e-08	2.03077e-08	3.69937e-08	3.9192e-08	4.30128e-08	1.9819e-08	4.07401e-08	-1.26507e-08
2300.51	16.26	1.19698e-08	-3.9406e-09	0	0	0	0	-5.51923e-09	-8.10461e-25	2.91757e-08	-3.53964e-08	5.11925e-09	1.74172e-09	5.58122e-09	1.64985e-08	3.15803e-08	-3.24892e-08	4.16892e-08
2317.35	16.26	0	0	-4.96068e-09	4.02559e-08	0	3.37849e-08	1.39992e-08	1.0983e-09	7.35028e-09	5.48527e-09	6.49699e-10	1.43596e-08	-5.61849e-09	1.18027e-09	-1.03282e-08	1.22945e-08	3.55135e-08
2334.19	16.26	0	-1.9289e-24	0	0	0	-3.211e-08	0	0	1.2244e-09	0	-1.27583e-09	1.18759e-08	5.04461e-09	0	-1.99795e-08	-3.21268e-08	5.1791e-08
2350.4	16.26	0	0	-3.729e-09	0	-3.308e-09	0	0	0	-1.85431e-09	1.62524e-08	9.05729e-09	-1.36123e-10	1.52355e-08	-2.24574e-09	0	0	-2.22698e-08
2366.68	16.26	0	-2.95189e-08	0	0	-1.31184e-10	5.77702e-09	0	-4.74879e-08	0	5.89157e-09	7.7375e-09	1.39581e-08	-1.74206e-09	7.10166e-09	2.28795e-24	-8.33577e-09	8.31161e-09
2384.12	16.26	0	-2.95946e-09	0	-4.69093e-09	9.02485e-10	0	0	3.25696e-10	-3.7728e-09	3.64828e-09	7.90996e-10	1.29496e-08	3.36277e-09	1.67657e-09	-2.64324e-08	-9.08739e-09	-9.86995e-09
2400.81	16.26	1.22146e-08	3.89574e-09	8.60108e-09	5.12184e-09	0	0	4.82753e-09	1.45211e-08	2.084e-09	2.36935e-09	-6.39849e-09	-2.935e-09	1.39038e-08	2.92208e-09	7.62738e-09	1.92862e-08	8.60421e-08
2417.5	16.26	0	0	5.27895e-08	0	2.9375e-09	4.25618e-09	7.3397e-09	1.39554e-24	3.75849e-09	3.09335e-09	-1.95014e-09	-4.56827e-09	1.7684e-08	3.87616e-09	5.26746e-09	1.77298e-09	1.72017e-08
2434.19	16.26	0	0	0	3.41633e-09	4.17217e-09	1.35678e-23	0	0	1.10341e-08	3.68759e-09	0	4.81039e-09	1.06239e-08	1.45743e-08	6.66034e-09	1.93086e-09	-6.82545e-09
2450.88	16.26	0	4.89689e-09	0	3.53145e-09	2.59984e-09	7.72146e-08	3.2311e-09	3.1095e-08	8.00582e-09	-2.14668e-24	2.13421e-08	1.45833e-09	2.1087e-08	8.24267e-09	3.50649e-08	1.59615e-08	-7.1035e-09
2467.57	16.26	3.64346e-08	4.03595e-08	2.40055e-08	1.419e-08	2.70132e-08	2.01774e-08	3.42059e-08	1.74215e-08	2.73957e-08	4.67949e-08	2.18184e-08	3.46108e-08	4.5713e-08	1.7896e-08	6.95867e-08	-1.79525e-08	6.9069e-08
2484.32	16.26	2.67136e-06	3.18432e-06	3.18935e-06	3.19607e-06	3.23778e-06	3.23257e-06	3.25721e-06	3.29496e-06	3.35077e-06	3.41266e-06	3.50124e-06	3.57231e-06	3.6918e-06	3.86825e-06	4.74472e-06	6.4121e-06	8.80196e-06
2501.08	16.26	1.6749e-06	1.61092e-06	1.60972e-06	1.60677e-06	1.63032e-06	1.59435e-06	1.61024e-06	1.5868e-06	1.58612e-06	1.58225e-06	1.63994e-06	1.62796e-06	1.63355e-06	1.64217e-06	1.76873e-06	2.00828e-06	2.27331e-06

## Sheet: k_ZY1F
Wavelength	FWHM	k_Summer_L	k_Summer_M	k_Summer_H	k_Winter_L	k_Winter_M	k_Winter_H	k_1976_L	k_1976_M	k_1976_H
1009.7	16.848	0	0	0	0	0	0	0	0	0	0	0	0	0	0	0	0	0
1026.55	16.846	0	0	0	0	0	0	0	0	0	0	0	-5.84908e-10	0	0	0	0	0
1043.4	16.846	6.32105e-07	5.28604e-07	5.04108e-07	5.1096e-07	4.94971e-07	4.9527e-07	4.5188e-07	4.53327e-07	4.63565e-07	4.61283e-07	4.02365e-07	3.84183e-07	3.27991e-07	2.32341e-07	9.4092e-08	-6.63822e-08	-1.13259e-07
1060.24	16.849	3.48509e-07	3.40783e-07	3.57037e-07	3.14856e-07	2.87659e-07	3.53102e-07	3.12912e-07	3.05806e-07	2.63815e-07	2.6101e-07	2.22233e-07	2.0442e-07	1.78991e-07	1.59634e-07	1.16881e-07	3.73117e-08	-1.88102e-09
1077.09	16.845	3.11803e-08	2.34503e-08	3.48339e-08	1.01177e-08	3.17894e-08	1.86725e-08	0	3.40405e-08	1.1695e-08	2.32045e-08	2.11333e-08	1.64961e-08	2.14334e-08	2.32748e-08	2.09597e-08	2.03885e-08	1.96625e-08
1093.94	16.845	0	0	0	4.30895e-25	0	2.41144e-10	2.28362e-09	8.04862e-10	7.93807e-10	2.14057e-09	2.57641e-09	4.26971e-09	-4.45988e-10	-1.51472e-09	-9.37723e-10	-5.29578e-09	-5.42523e-09
1110.78	16.848	8.97696e-10	1.36309e-09	1.56931e-09	1.85921e-10	2.34374e-10	5.10229e-10	0	1.41162e-09	5.72538e-10	-5.24978e-10	1.78131e-09	1.23918e-10	-9.31831e-10	1.26321e-09	-8.23942e-10	-2.23311e-09	0
1127.63	16.848	2.58552e-09	2.03837e-09	5.31363e-10	6.74028e-10	0	-4.58604e-10	1.1455e-09	0	1.52639e-09	6.32401e-10	1.9296e-09	0	8.06183e-10	8.6536e-11	-7.91572e-10	1.88208e-09	1.71909e-09
1144.48	16.845	0	0	-7.261e-10	0	0	0	0	0	1.4303e-09	0	0	0	0	-5.87448e-10	8.0331e-25	0	2.01773e-09
1161.32	16.849	0	0	0	0	0	0	0	-5.598e-10	0	0	0	-2.28686e-10	-1.63195e-09	0	0	0	0
1178.17	16.845	0	0	0	0	0	0	0	0	0	0	0	0	0	0	0	-2.06453e-26	-3.41081e-09
1195.02	16.848	2.94781e-07	2.64101e-07	2.64236e-07	2.65742e-07	2.60984e-07	2.58338e-07	2.55284e-07	2.57352e-07	2.53005e-07	2.52037e-07	2.45631e-07	2.43399e-07	2.37605e-07	2.33955e-07	2.29631e-07	2.04743e-07	1.9796e-07
1211.86	16.845	2.44102e-05	2.28234e-05	2.27089e-05	2.25968e-05	2.25202e-05	2.24066e-05	2.2311e-05	2.21332e-05	2.19699e-05	2.18196e-05	2.1601e-05	2.15021e-05	2.10023e-05	2.04863e-05	2.03275e-05	1.82574e-05	1.82181e-05
1228.71	16.848	8.04514e-06	7.37801e-06	7.3307e-06	7.29945e-06	7.26741e-06	7.23658e-06	7.2051e-06	7.13817e-06	7.06398e-06	7.01928e-06	6.96536e-06	6.95554e-06	6.74589e-06	6.50388e-06	6.29016e-06	5.52444e-06	5.79328e-06
1245.56	16.848	2.39495e-07	2.14249e-07	2.10612e-07	2.06493e-07	2.01208e-07	2.12243e-07	2.04093e-07	1.98641e-07	1.97469e-07	1.98776e-07	1.96968e-07	1.89498e-07	1.93591e-07	1.95507e-07	1.75974e-07	1.80834e-07	1.73016e-07
1262.4	16.846	2.27334e-07	1.97424e-07	1.956e-07	2.00046e-07	2.00131e-07	1.90761e-07	1.96809e-07	1.94857e-07	1.95394e-07	1.9628e-07	2.00584e-07	1.86623e-07	1.78053e-07	1.80965e-07	2.19544e-07	1.77051e-07	1.91283e-07
1279.25	16.845	1.48169e-08	2.38654e-08	2.8299e-08	2.23679e-08	2.39948e-08	2.20488e-08	2.57062e-08	2.2669e-08	2.39716e-08	3.15884e-08	1.70819e-08	1.85689e-08	2.58968e-08	1.31225e-08	2.20526e-08	1.57264e-08	3.09333e-08
1296.09	16.849	1.35526e-06	1.08641e-06	1.08708e-06	1.07996e-06	1.07106e-06	1.06681e-06	1.09929e-06	1.07662e-06	1.11777e-06	1.09396e-06	1.15675e-06	1.14432e-06	1.12098e-06	9.65415e-07	5.10231e-07	-3.46122e-07	-1.20216e-06
1312.94	16.845	4.49715e-06	4.34821e-06	4.33985e-06	4.32019e-06	4.32604e-06	4.30839e-06	4.30738e-06	4.29111e-06	4.2636e-06	4.24468e-06	4.22998e-06	4.22261e-06	4.08046e-06	3.97318e-06	3.99789e-06	4.40388e-06	5.33536e-06
1329.79	16.846	7.69319e-07	7.13088e-07	7.12195e-07	7.07432e-07	7.05717e-07	6.962e-07	7.0168e-07	6.7645e-07	6.86592e-07	6.52736e-07	6.12202e-07	6.04615e-07	5.74563e-07	5.37847e-07	6.11485e-07	5.93311e-07	3.82366e-07
1346.63	16.848	2.64545e-06	2.3756e-06	2.36611e-06	2.38584e-06	2.37036e-06	2.35906e-06	2.33905e-06	2.32727e-06	2.31515e-06	2.29813e-06	2.2433e-06	2.26301e-06	2.20097e-06	2.21544e-06	2.23229e-06	2.18605e-06	2.27883e-06
1363.48	16.848	2.44795e-07	3.13675e-07	3.09447e-07	3.12168e-07	3.07805e-07	3.23874e-07	3.35054e-07	3.17545e-07	3.08644e-07	3.38826e-07	3.18021e-07	3.19605e-07	3.16901e-07	3.22487e-07	3.17309e-07	3.42432e-07	3.51172e-07
1380.33	16.845	2.44839e-07	2.19437e-07	2.44531e-07	2.61779e-07	2.52736e-07	2.40178e-07	2.60128e-07	2.32259e-07	2.33262e-07	2.06279e-07	2.83716e-07	2.41911e-07	2.75278e-07	2.3616e-07	2.54971e-07	2.6789e-07	2.87214e-07
1397.17	16.848	7.89761e-09	-3.48138e-09	-6.74484e-10	1.10848e-09	1.18467e-09	-1.80674e-09	1.83434e-08	6.27221e-09	3.35343e-09	-6.60139e-10	-3.77313e-09	1.98768e-08	-8.0168e-09	1.78703e-08	-4.44646e-11	8.12505e-09	-1.05399e-08
1414.02	16.848	5.17751e-24	-8.82425e-10	1.30957e-08	1.38882e-09	1.75777e-09	-5.57699e-10	-1.00747e-09	-1.45307e-09	-2.82493e-09	-1.58189e-08	1.28978e-08	-7.42533e-10	7.86669e-09	6.92539e-10	-2.85508e-09	-7.85408e-09	1.92504e-09
1430.87	16.845	0.000159095	0.000148622	0.000148035	0.000147452	0.00014686	0.00014628	0.000145678	0.000144446	0.000143229	0.000141974	0.000139411	0.000136711	0.00013372	0.000128898	0.000119908	0.000109812	9.94763e-05
1447.71	16.846	5.83742e-05	5.31693e-05	5.30211e-05	5.29104e-05	5.27905e-05	5.26085e-05	5.24716e-05	5.22069e-05	5.19766e-05	5.16885e-05	5.12869e-05	5.0979e-05	5.0291e-05	4.92509e-05	4.77875e-05	4.60225e-05	4.47652e-05
1464.56	16.846	2.02282e-06	1.96097e-06	1.98518e-06	2.00133e-06	1.976e-06	1.97178e-06	1.98528e-06	1.97899e-06	1.99209e-06	1.99597e-06	2.0131e-06	2.01359e-06	2.01846e-06	2.0247e-06	2.03808e-06	2.14392e-06	2.1737e-06
1481.41	16.846	5.60648e-06	5.97916e-06	5.96413e-06	5.97442e-06	5.96498e-06	5.97153e-06	5.97269e-06	5.98593e-06	6.03128e-06	6.0403e-06	6.08654e-06	6.17139e-06	6.23038e-06	6.4241e-06	6.89798e-06	7.31386e-06	7.86593e-06
1498.25	16.849	2.19956e-06	2.01351e-06	2.00775e-06	2.00623e-06	1.96398e-06	1.93597e-06	1.93498e-06	1.9164e-06	1.78746e-06	1.77609e-06	1.67387e-06	1.58588e-06	1.50569e-06	1.44174e-06	1.5006e-06	1.1035e-06	8.57106e-07
1515.1	16.844	6.71074e-08	5.91761e-08	6.66527e-08	5.71789e-08	6.07333e-08	6.5484e-08	5.00324e-08	4.45606e-08	5.65266e-08	7.14077e-08	7.34042e-08	7.55971e-08	5.37474e-08	5.83488e-08	8.06723e-08	6.98307e-08	7.97005e-08
1531.94	16.848	2.34213e-05	2.20656e-05	2.19161e-05	2.1787e-05	2.16981e-05	2.15518e-05	2.14012e-05	2.12133e-05	2.09581e-05	2.07641e-05	2.06876e-05	2.07871e-05	1.99657e-05	1.92967e-05	1.88583e-05	1.42363e-05	1.55716e-05
1548.79	16.848	7.40651e-06	7.01598e-06	7.00729e-06	6.96337e-06	6.92556e-06	6.91198e-06	6.868e-06	6.79587e-06	6.7427e-06	6.73259e-06	6.61398e-06	6.57014e-06	6.34171e-06	6.06695e-06	6.40483e-06	5.02539e-06	5.02616e-06
1565.64	16.846	6.63841e-05	7.35813e-05	7.31849e-05	7.28434e-05	7.25094e-05	7.2094e-05	7.18255e-05	7.1133e-05	7.06774e-05	7.02173e-05	6.95349e-05	6.8881e-05	6.69741e-05	6.42654e-05	6.07608e-05	5.38458e-05	5.29203e-05
1582.49	16.845	9.21656e-05	0.00010351	0.000102967	0.000102435	0.000101943	0.00010151	0.000101021	0.000100147	9.94182e-05	9.87853e-05	9.76157e-05	9.69414e-05	9.46882e-05	9.15103e-05	8.77838e-05	7.58518e-05	7.29321e-05
1599.33	16.848	0.000105789	0.000122267	0.000121695	0.000121147	0.000120647	0.000120065	0.000119605	0.000118659	0.000117839	0.000117149	0.00011597	0.00011538	0.00011225	0.00010748	0.000101192	8.53371e-05	8.04813e-05
1616.18	16.846	6.54478e-05	7.21719e-05	7.16749e-05	7.12985e-05	7.08122e-05	7.05847e-05	7.00391e-05	6.93921e-05	6.86973e-05	6.83413e-05	6.72367e-05	6.66111e-05	6.46854e-05	6.23277e-05	6.12775e-05	5.08547e-05	4.97125e-05
1633.03	16.846	7.65793e-06	7.2285e-06	7.24104e-06	7.0615e-06	6.97457e-06	6.94046e-06	6.74394e-06	6.64101e-06	6.43109e-06	6.33042e-06	6.28101e-06	6.26742e-06	6.00376e-06	5.34037e-06	4.29396e-06	1.13773e-06	1.08408e-06
1649.87	16.848	2.46072e-05	2.3738e-05	2.36145e-05	2.35008e-05	2.34109e-05	2.33144e-05	2.32698e-05	2.31586e-05	2.30789e-05	2.30526e-05	2.3194e-05	2.36258e-05	2.28438e-05	2.18376e-05	2.19947e-05	1.86043e-05	2.26413e-05
1666.72	16.845	1.94413e-06	1.80007e-06	1.75143e-06	1.72429e-06	1.66838e-06	1.65989e-06	1.67778e-06	1.58397e-06	1.59267e-06	1.57868e-06	1.61787e-06	1.68008e-06	1.57686e-06	1.34224e-06	9.9682e-07	2.91976e-07	3.8371e-07
1683.56	16.849	1.86394e-07	1.59165e-07	1.50001e-07	1.53589e-07	1.61105e-07	1.48302e-07	1.74788e-07	1.50834e-07	1.42447e-07	1.66987e-07	1.65306e-07	1.57061e-07	1.19601e-07	1.83503e-07	1.74762e-07	1.07975e-07	1.41019e-07
1700.41	16.845	1.08043e-08	7.07715e-09	1.01044e-08	1.35346e-08	3.22438e-09	2.87973e-08	2.41125e-08	2.46328e-08	2.38242e-08	1.85515e-08	3.85589e-08	1.21255e-08	2.11844e-08	1.64756e-08	1.4339e-09	8.33816e-09	6.57238e-09
1717.26	16.846	1.31651e-08	2.11439e-08	8.30425e-09	2.20073e-08	8.43229e-09	1.33905e-08	4.90383e-09	1.53757e-08	1.60507e-08	1.1448e-08	9.5692e-09	1.90511e-08	2.1964e-08	1.39982e-08	2.34064e-08	3.63355e-09	-5.57105e-09
1734.1	16.849	0	-5.78753e-25	0	2.43873e-09	8.18059e-09	5.38106e-09	0	0	0	5.99516e-10	0	3.3798e-09	3.33552e-09	4.78643e-10	-1.8409e-09	3.62822e-09	8.39317e-09
1750.95	16.845	1.21116e-07	1.30385e-07	1.26945e-07	1.03009e-07	1.12005e-07	1.09428e-07	1.21726e-07	1.00931e-07	1.17394e-07	1.03767e-07	1.53508e-07	1.25317e-07	7.9746e-08	1.33147e-07	1.11401e-07	1.09435e-07	1.68988e-07
1767.8	16.845	1.30349e-07	1.20884e-07	1.19974e-07	8.88224e-08	1.18193e-07	1.16512e-07	9.60733e-08	1.01398e-07	8.32336e-08	8.45265e-08	1.0024e-07	9.68847e-08	1.07923e-07	1.02968e-07	1.01466e-07	1.07552e-07	1.11684e-07
1784.64	16.849	1.21736e-07	1.5472e-07	1.41667e-07	1.325e-07	1.10333e-07	1.45599e-07	1.5778e-07	1.38884e-07	9.66056e-08	1.30216e-07	1.41722e-07	1.143e-07	1.01787e-07	1.00537e-07	1.23756e-07	1.65613e-07	1.97716e-07
1801.49	16.845	7.90202e-08	9.70136e-08	1.05495e-07	1.01114e-07	7.96862e-08	7.27252e-08	4.75623e-08	1.07247e-07	8.68518e-08	6.91747e-08	6.21324e-08	7.87215e-08	8.29113e-08	1.31e-07	1.18228e-07	1.17798e-07	1.48869e-07
1818.34	16.846	-1.4009e-09	-1.67177e-08	-1.8279e-08	3.71924e-09	-2.78058e-09	-1.61506e-08	4.98274e-09	-1.27927e-08	-2.51524e-08	-1.70206e-08	-1.13109e-08	-1.64807e-08	-2.05822e-08	-1.93209e-08	-2.59432e-08	-5.0466e-08	-2.49934e-08
1835.18	16.849	3.28675e-08	6.664e-08	7.05242e-08	6.4167e-08	5.0719e-08	5.51061e-08	6.44294e-08	6.72792e-08	5.93025e-08	6.66237e-08	4.99745e-08	5.33875e-08	6.73524e-08	7.39358e-08	5.98389e-08	5.07041e-08	6.00187e-08
1852.03	16.846	-2.89817e-08	-6.34904e-08	-6.41378e-08	-6.42325e-08	-6.4333e-08	-5.75438e-08	-6.60044e-08	-6.56248e-08	-6.6279e-08	-6.61945e-08	-6.66458e-08	-6.74914e-08	-6.76625e-08	-9.2986e-08	-7.36675e-08	-8.23424e-08	-8.96332e-08
1868.88	16.845	2.54724e-06	6.33816e-06	6.35583e-06	6.37546e-06	6.37429e-06	6.41947e-06	6.4243e-06	6.46764e-06	6.49626e-06	6.55198e-06	6.61362e-06	6.7067e-06	6.80569e-06	7.03521e-06	7.45495e-06	8.14994e-06	8.74964e-06
1885.72	16.848	3.52682e-05	2.92108e-05	2.91688e-05	2.91514e-05	2.90887e-05	2.90299e-05	2.8978e-05	2.8927e-05	2.88712e-05	2.87212e-05	2.85294e-05	2.83327e-05	2.81791e-05	2.78529e-05	2.72617e-05	2.68724e-05	2.6615e-05
1902.57	16.845	3.29123e-06	4.52312e-06	4.53837e-06	4.57655e-06	4.57292e-06	4.60365e-06	4.59959e-06	4.62164e-06	4.58543e-06	4.6358e-06	4.71363e-06	4.71428e-06	4.83897e-06	4.96535e-06	5.32238e-06	5.81509e-06	6.31866e-06
1919.41	16.848	5.54514e-07	6.52246e-07	6.41215e-07	6.64086e-07	6.38057e-07	6.41056e-07	6.92187e-07	6.622e-07	6.50145e-07	6.44851e-07	6.65544e-07	7.35338e-07	7.03852e-07	7.00285e-07	7.3053e-07	9.24997e-07	9.54187e-07
1936.26	16.849	7.82917e-05	5.03017e-05	4.97892e-05	4.93105e-05	4.89321e-05	4.84434e-05	4.80427e-05	4.71928e-05	4.63481e-05	4.55901e-05	4.39032e-05	4.24106e-05	4.07568e-05	3.84606e-05	3.50211e-05	3.21102e-05	3.00394e-05
1953.11	16.845	0.0010857	0.000923621	0.000918953	0.000914234	0.000909504	0.000904709	0.000899892	0.000890116	0.000880286	0.000870292	0.000849856	0.000828991	0.000806828	0.000771086	0.000702154	0.00063133	0.000557113
1969.96	16.845	0.000617715	0.000588588	0.000586294	0.000583996	0.000581748	0.000579519	0.000577126	0.00057266	0.00056819	0.000563666	0.000554669	0.000545545	0.000534848	0.000517996	0.000486131	0.000450844	0.000413212
1986.8	16.846	5.76792e-05	5.47698e-05	5.45851e-05	5.4256e-05	5.43163e-05	5.40066e-05	5.40201e-05	5.37112e-05	5.3756e-05	5.38839e-05	5.42097e-05	5.51617e-05	5.42362e-05	5.30645e-05	5.34336e-05	4.84139e-05	5.4897e-05
2003.65	16.846	0.00196597	0.0017346	0.00172799	0.00172127	0.0017144	0.00170754	0.00170043	0.00168611	0.00167133	0.00165602	0.00162377	0.00158897	0.00155531	0.00149863	0.00137719	0.0012567	0.00112227
2020.49	16.848	0.00123435	0.00112703	0.00112279	0.00111846	0.00111409	0.00110975	0.00110534	0.00109636	0.00108747	0.00107824	0.00105927	0.0010392	0.00101946	0.000986791	0.000919537	0.000850773	0.000769011
2037.34	16.846	0.000300389	0.000299433	0.000298002	0.000296226	0.00029495	0.000293391	0.000292147	0.000289469	0.000287355	0.000285324	0.000282629	0.000282038	0.000275196	0.000266084	0.000256137	0.000217485	0.000222301
2054.19	16.848	0.000857273	0.000860453	0.000856791	0.000852767	0.00084906	0.000845374	0.000841438	0.000833306	0.000825198	0.000816499	0.000799327	0.000780444	0.000764389	0.00073781	0.000681705	0.000629477	0.000570172
2071.03	16.845	0.000714399	0.000707956	0.000704657	0.000701321	0.000697888	0.000694806	0.000691572	0.000685105	0.000678596	0.000672058	0.000658571	0.000644715	0.000631276	0.000609482	0.000567162	0.000517991	0.000471305
2087.88	16.846	0.00025273	0.000248173	0.000246718	0.00024514	0.00024361	0.000242218	0.000240942	0.000238285	0.000236239	0.00023414	0.000231316	0.000230383	0.000222923	0.000212949	0.000202794	0.000164528	0.000172923
2104.73	16.846	4.18537e-05	3.99943e-05	3.97891e-05	3.97103e-05	3.96594e-05	3.93969e-05	3.92384e-05	3.90928e-05	3.96298e-05	3.95214e-05	4.0573e-05	4.10948e-05	3.99921e-05	3.86015e-05	3.46323e-05	2.11238e-05	4.21795e-05
2121.57	16.849	8.75082e-06	7.43958e-06	7.36787e-06	6.92942e-06	6.94471e-06	6.42681e-06	6.33852e-06	6.17056e-06	5.77251e-06	5.346e-06	4.98161e-06	4.91772e-06	4.05681e-06	3.04582e-06	2.15807e-06	-4.55072e-06	-5.66642e-06
2138.42	16.845	2.55736e-06	2.1566e-06	2.24683e-06	2.05848e-06	2.12276e-06	1.937e-06	2.03453e-06	1.82785e-06	1.54369e-06	1.47552e-06	1.07336e-06	9.99351e-07	5.0235e-07	2.10305e-07	2.30369e-07	-6.90781e-07	2.49383e-06
2155.27	16.848	1.42638e-05	1.26719e-05	1.22585e-05	1.21026e-05	1.20465e-05	1.1923e-05	1.14075e-05	1.10574e-05	1.06639e-05	1.03859e-05	9.73925e-06	9.30529e-06	9.04907e-06	9.11083e-06	1.13962e-05	1.11511e-05	2.29477e-05
2172.11	16.846	5.54503e-06	5.02269e-06	4.9502e-06	5.08743e-06	4.75928e-06	4.67915e-06	4.57575e-06	4.4807e-06	4.35672e-06	4.24275e-06	3.6168e-06	3.62532e-06	2.93425e-06	1.27332e-06	-1.29252e-06	-6.30665e-06	-7.85574e-06
2188.96	16.846	7.4945e-07	6.98684e-07	6.72604e-07	6.62507e-07	6.38587e-07	6.76602e-07	6.67182e-07	7.10638e-07	6.95595e-07	6.59041e-07	6.18186e-07	5.7704e-07	6.79122e-07	6.66351e-07	7.41837e-07	4.10764e-07	9.64796e-07
2205.81	16.845	1.84796e-07	1.57627e-07	2.31328e-07	1.06318e-07	1.82398e-07	1.32018e-07	1.92392e-07	8.72838e-08	2.0355e-07	1.83947e-07	1.48197e-07	1.76619e-07	1.56842e-07	1.60212e-07	1.67885e-07	7.92214e-08	2.17234e-07
2222.65	16.85	1.89804e-07	2.09086e-07	2.40673e-07	1.44313e-07	2.21455e-07	1.51184e-07	1.75177e-07	1.7653e-07	1.42159e-07	1.79346e-07	3.08356e-07	1.24182e-07	1.6642e-07	1.5228e-07	1.61342e-07	6.47691e-08	1.73755e-07
2239.5	16.846	2.94998e-08	1.84704e-08	4.16088e-08	2.94214e-08	4.21647e-08	1.52212e-23	5.08853e-08	2.56877e-08	4.0221e-08	7.53126e-09	1.70076e-08	3.11014e-08	3.42839e-08	4.80442e-08	2.30089e-08	2.25237e-08	1.67081e-08
2256.35	16.845	1.85364e-07	1.08109e-07	1.47649e-07	1.76896e-07	2.20633e-07	1.50924e-07	1.32838e-07	2.83957e-07	1.65483e-07	1.06148e-07	1.25695e-07	1.50841e-07	1.37265e-07	1.47083e-07	1.59183e-07	1.14682e-07	7.39904e-08
2273.19	16.846	8.64111e-08	8.28107e-08	5.06564e-08	2.54901e-08	1.08866e-07	3.43184e-08	1.10127e-07	8.52103e-09	6.52339e-08	2.16183e-08	2.81071e-08	3.99974e-08	4.90008e-08	7.09763e-08	6.47118e-08	6.38567e-08	1.39729e-08
2290.04	16.848	1.58389e-08	-2.93974e-09	0	0	0	2.18543e-08	3.7491e-09	2.10337e-09	2.83954e-08	-1.23064e-08	1.40716e-08	2.30914e-08	1.69468e-08	1.5292e-08	8.39574e-09	-4.48451e-09	1.01e-08
2306.89	16.845	7.92817e-09	-3.46166e-09	-7.3883e-09	3.80852e-08	2.07062e-08	2.23524e-08	5.6025e-09	-1.36826e-08	4.67328e-08	-2.08106e-08	-3.75975e-09	8.42396e-09	2.41133e-09	7.08258e-09	2.01782e-08	2.78221e-09	1.25084e-08
2323.73	16.848	0	-3.52622e-24	0	0	0	0	0	8.40542e-09	4.77718e-09	6.4598e-09	3.58127e-09	-1.47963e-09	-7.17873e-09	-3.36534e-09	3.92851e-24	9.97662e-09	4.81368e-08
2340.58	16.846	0	0	0	0	-1.84e-09	-3.26447e-08	0	0	5.42594e-09	9.21362e-09	-2.88921e-09	1.12178e-08	3.87554e-09	0	-2.44087e-08	-1.70027e-08	4.20487e-08
2357.43	16.848	0	-5.44697e-08	-2.59039e-09	0	-6.86531e-10	0	0	-4.34492e-08	-1.64274e-09	1.99303e-09	5.60959e-09	1.35455e-08	1.1421e-08	7.06118e-10	0	-1.33162e-08	-9.83392e-09
2374.27	16.846	0	4.08033e-08	0	-3.82177e-09	-1.84901e-09	5.09017e-09	0	-1.47281e-09	-5.53619e-09	5.01822e-09	3.07962e-09	-1.64208e-24	3.56032e-09	3.06237e-09	1.60675e-24	-2.09114e-08	-5.00236e-09
2391.12	16.845	0	-3.14459e-09	1.7009e-08	-3.97888e-25	1.55831e-09	0	4.27204e-09	-7.84495e-10	2.96176e-09	5.31387e-09	1.41899e-09	1.39396e-08	1.48262e-08	6.85969e-09	-2.04664e-08	2.34691e-08	3.94375e-08
2407.96	16.848	1.5475e-08	5.78201e-09	0	7.9717e-09	1.46095e-09	0	1.72976e-24	3.53186e-08	0	2.52162e-09	-1.14056e-09	1.29017e-09	1.20955e-08	1.10909e-24	8.43332e-09	8.99087e-24	2.24931e-08
2424.81	16.848	0	0	4.28826e-08	0	1.96506e-09	6.53281e-09	7.42849e-09	0	1.07754e-08	3.59811e-09	-4.84724e-09	-4.88258e-09	2.20062e-08	6.71944e-09	1.06731e-09	-4.52209e-09	9.7111e-09
2441.66	16.845	0	0	0	3.44162e-09	2.23724e-09	2.42638e-10	2.35344e-09	1.83715e-09	2.92378e-09	4.51201e-09	3.82599e-10	2.73651e-09	-1.31339e-09	-9.89809e-25	2.7525e-08	-4.49029e-09	-1.62051e-08
2458.5	16.849	0	1.86254e-08	7.52738e-09	0	3.19082e-09	4.92319e-08	5.83387e-09	4.37128e-08	1.65255e-08	1.27173e-08	1.60869e-08	5.42981e-09	2.54661e-08	1.61098e-08	2.38324e-08	1.02461e-08	2.29615e-08
2475.35	16.845	2.29785e-07	1.94644e-07	1.94294e-07	2.03962e-07	2.08186e-07	1.98604e-07	2.1136e-07	1.91766e-07	1.87079e-07	2.06576e-07	1.92147e-07	1.76553e-07	2.01148e-07	1.74497e-07	2.48857e-07	1.50261e-07	2.18794e-07
2492.2	16.846	3.25734e-06	3.64348e-06	3.61206e-06	3.63705e-06	3.68191e-06	3.67443e-06	3.66483e-06	3.71421e-06	3.77916e-06	3.80601e-06	3.89208e-06	3.95101e-06	4.06963e-06	4.22866e-06	4.98186e-06	6.56146e-06	8.66529e-06
2509.04	16.849	1.35925e-06	1.21033e-06	1.22925e-06	1.21925e-06	1.19791e-06	1.19565e-06	1.22257e-06	1.20378e-06	1.20142e-06	1.16584e-06	1.238e-06	1.17107e-06	1.23993e-06	1.25187e-06	1.29062e-06	1.41064e-06	1.58638e-06

## Sheet: k_GF5B
Wavelength	FWHM	k_Summer_L	k_Summer_M	k_Summer_H	k_Winter_L	k_Winter_M	k_Winter_H	k_1976_L	k_1976_M	k_1976_H
1009	8.546	0	0	0	0	0	0	0	0	0	0	0	0	0	0	0	0	0
1017.42	8.546	0	0	0	0	0	0	0	0	0	0	0	0	0	0	0	0	0
1025.83	8.546	0	0	0	0	0	0	0	0	0	0	0	0	0	0	0	0	0
1034.25	8.546	2.76904e-07	2.55876e-07	2.22223e-07	2.34914e-07	2.365e-07	2.28903e-07	2.26369e-07	2.11653e-07	2.31026e-07	2.3889e-07	2.23061e-07	2.22744e-07	2.16668e-07	2.12842e-07	2.13612e-07	1.84985e-07	1.95382e-07
1042.67	8.546	2.82197e-07	2.65478e-07	2.44992e-07	2.32605e-07	2.28283e-07	2.45868e-07	1.7257e-07	2.14106e-07	2.36808e-07	2.4002e-07	2.19995e-07	2.22539e-07	2.19573e-07	2.08592e-07	1.99121e-07	1.80396e-07	1.96324e-07
1051.08	8.546	1.44112e-06	1.19014e-06	1.18564e-06	1.23783e-06	1.16155e-06	1.10188e-06	1.06822e-06	1.02845e-06	8.92858e-07	8.34607e-07	6.05031e-07	4.81108e-07	3.05862e-07	-1.1553e-08	-4.98379e-07	-1.06074e-06	-1.39802e-06
1059.5	8.546	1.25423e-07	1.16337e-07	1.28229e-07	7.57041e-08	7.41736e-08	1.40953e-07	1.15315e-07	1.52234e-07	1.40933e-07	8.52022e-08	1.15873e-07	1.14606e-07	1.00687e-07	1.07649e-07	1.07618e-07	7.56722e-08	9.39607e-08
1067.92	8.546	1.67778e-07	2.00109e-07	2.29855e-07	1.67928e-07	1.66532e-07	2.62142e-07	1.96279e-07	1.91746e-07	1.20323e-07	2.10458e-07	1.85498e-07	1.89234e-07	1.73616e-07	1.74051e-07	1.61455e-07	1.67591e-07	1.56762e-07
1076.33	8.546	5.69181e-08	2.53547e-08	5.10746e-08	5.11438e-09	4.49413e-08	0	0	3.26574e-08	1.74431e-08	3.10961e-08	1.84806e-08	1.64177e-08	2.33212e-08	2.82666e-08	3.05673e-08	2.50496e-08	2.7989e-08
1084.75	8.546	0	0	0	1.80622e-08	0	2.04229e-09	0	0	0	-3.92092e-10	1.26808e-09	-6.39282e-10	-3.03351e-10	-2.83803e-10	-2.73088e-09	0	7.5043e-09
1093.17	8.546	0	0	0	-2.49817e-25	0	0	4.06305e-09	7.95216e-10	0	3.45363e-09	4.3913e-09	7.46607e-09	-1.90076e-09	-2.09714e-09	-9.17402e-10	-2.52477e-09	-9.20422e-09
1101.58	8.546	0	0	0	0	0	7.39383e-10	0	1.09116e-09	2.43595e-09	0	0	-1.38297e-09	3.53796e-09	1.31115e-09	0	-3.88158e-09	5.64251e-10
1110	8.546	0	3.06784e-10	6.9359e-10	-1.99562e-10	-3.02591e-25	0	0	1.37567e-09	-2.05394e-10	-6.90686e-10	2.10587e-09	1.78117e-09	0	9.08287e-25	-1.71305e-09	0	0
1118.42	8.546	2.79891e-09	3.21298e-09	2.88087e-09	4.02807e-10	1.27226e-09	4.88253e-10	-1.47027e-09	3.21047e-10	1.31302e-09	-5.1593e-10	-2.151e-25	-4.00563e-09	-2.06558e-09	1.09907e-08	-5.99595e-09	-8.00788e-09	0
1126.83	8.546	3.4684e-09	9.81119e-10	0	2.84765e-09	0	1.26519e-09	3.04948e-09	0	0	0	0	0	4.82193e-09	0	0	0	0
1135.25	8.546	0	3.73258e-09	1.19236e-09	-1.57936e-09	0	-1.39528e-09	3.14927e-25	0	5.18582e-09	1.4362e-09	2.2342e-09	0	-2.35915e-09	-9.8093e-09	3.39044e-09	3.81086e-09	3.57012e-09
1143.67	8.546	0	0	0	0	0	0	0	0	0	0	0	0	0	0	0	0	0
1152.08	8.546	0	0	-1.78701e-09	0	0	0	0	-1.08715e-09	3.97132e-09	0	0	0	-4.12207e-09	0	0	0	4.90073e-09
1160.5	8.546	0	0	0	0	0	0	0	0	0	0	0	-2.86734e-10	0	0	0	0	0
1168.92	8.546	0	0	0	0	0	0	0	0	0	0	0	0	0	0	0	-1.44095e-24	-1.18629e-08
1177.33	8.546	0	0	0	0	0	0	0	0	0	0	0	0	0	0	0	0	0
1185.75	8.546	0	0	0	0	0	0	0	0	0	0	0	0	0	0	0	0	0
1194.17	8.546	0	0	2.87563e-09	1.30757e-09	0	0	-1.4283e-09	0	3.4844e-09	1.84378e-09	0	0	-1.09473e-09	0	0	4.05028e-09	4.06126e-09
1202.58	8.546	2.57068e-05	2.39929e-05	2.38885e-05	2.37983e-05	2.37219e-05	2.36258e-05	2.35364e-05	2.34072e-05	2.32633e-05	2.31422e-05	2.29534e-05	2.28563e-05	2.23334e-05	2.17255e-05	2.13579e-05	1.99712e-05	2.01829e-05
1211	8.546	1.73304e-05	1.62041e-05	1.61103e-05	1.60291e-05	1.59809e-05	1.58851e-05	1.58188e-05	1.56757e-05	1.55516e-05	1.5424e-05	1.52451e-05	1.51563e-05	1.47753e-05	1.44105e-05	1.43447e-05	1.24645e-05	1.22588e-05
1219.42	8.546	2.71797e-05	2.50958e-05	2.49772e-05	2.48584e-05	2.47535e-05	2.46483e-05	2.45381e-05	2.43592e-05	2.41885e-05	2.40642e-05	2.38935e-05	2.38606e-05	2.32886e-05	2.26711e-05	2.24094e-05	2.02234e-05	2.08534e-05
1227.83	8.546	6.27604e-06	5.58627e-06	5.53229e-06	5.50338e-06	5.47437e-06	5.44162e-06	5.41912e-06	5.33658e-06	5.23099e-06	5.18121e-06	5.0929e-06	5.0428e-06	4.88825e-06	4.73173e-06	4.59995e-06	3.72139e-06	3.78445e-06
1236.25	8.546	1.18735e-06	1.04e-06	1.03486e-06	1.02723e-06	1.0213e-06	1.01814e-06	9.97878e-07	9.96164e-07	9.97681e-07	9.87004e-07	9.70593e-07	9.68061e-07	9.46473e-07	9.06311e-07	8.7543e-07	8.03774e-07	8.57443e-07
1244.67	8.546	4.93358e-08	8.85118e-08	8.5169e-08	8.2414e-08	6.81509e-08	8.81584e-08	8.63474e-08	7.29556e-08	7.50547e-08	7.50708e-08	8.71305e-08	6.52263e-08	8.23671e-08	9.59836e-08	7.86142e-08	7.20079e-08	7.01177e-08
1253.08	8.546	2.89135e-07	2.02428e-07	1.94483e-07	2.03419e-07	2.1512e-07	2.05682e-07	1.97813e-07	2.01663e-07	1.8852e-07	1.91696e-07	1.89387e-07	2.00753e-07	1.88956e-07	1.88304e-07	1.81399e-07	1.84761e-07	1.3013e-07
1261.5	8.546	2.71101e-07	2.29833e-07	2.26418e-07	2.33859e-07	2.34227e-07	2.23138e-07	2.2925e-07	2.20675e-07	2.31465e-07	2.18241e-07	2.37065e-07	2.18828e-07	2.09315e-07	1.9727e-07	2.48986e-07	1.99711e-07	2.54554e-07
1269.92	8.546	6.96005e-08	6.26901e-08	6.52245e-08	6.18718e-08	6.01201e-08	5.59987e-08	6.6402e-08	6.31703e-08	5.83223e-08	8.14126e-08	5.86537e-08	5.33809e-08	5.20545e-08	6.56819e-08	7.96003e-08	8.0896e-08	7.48875e-08
1278.33	8.546	0	1.86145e-09	4.80267e-09	-3.61098e-10	3.1829e-09	-4.53436e-09	2.84978e-09	-5.10786e-10	2.10964e-09	2.73927e-09	0	1.5379e-09	-4.92382e-09	-6.11213e-09	0	2.63909e-09	0
1286.75	8.546	7.53116e-07	6.89016e-07	6.88913e-07	6.68747e-07	6.61576e-07	6.87864e-07	6.81221e-07	6.5473e-07	6.57898e-07	6.38562e-07	6.1543e-07	6.37888e-07	6.86882e-07	6.12589e-07	5.09687e-07	1.45714e-07	-5.0131e-08
1295.17	8.546	1.71319e-06	1.26344e-06	1.27355e-06	1.26539e-06	1.25232e-06	1.22321e-06	1.28909e-06	1.28428e-06	1.35346e-06	1.35452e-06	1.43553e-06	1.38264e-06	1.26755e-06	9.61965e-07	1.10298e-07	-1.07573e-06	-2.27345e-06
1303.58	8.546	3.11375e-08	1.70206e-08	1.9891e-08	2.49365e-08	2.84526e-08	2.36021e-08	3.03448e-08	1.90287e-08	2.15717e-08	1.28445e-08	1.86302e-08	1.27128e-08	3.63571e-08	2.95499e-08	3.84698e-08	-4.99979e-09	3.74032e-08
1312	8.546	4.05233e-06	3.80072e-06	3.78181e-06	3.76218e-06	3.77505e-06	3.7626e-06	3.74204e-06	3.73729e-06	3.69803e-06	3.69086e-06	3.65423e-06	3.65484e-06	3.49915e-06	3.34692e-06	3.37148e-06	3.74203e-06	4.23992e-06
1320.42	8.546	5.54773e-06	5.50127e-06	5.4994e-06	5.48751e-06	5.48916e-06	5.4726e-06	5.4875e-06	5.47115e-06	5.45416e-06	5.43761e-06	5.41073e-06	5.3724e-06	5.21232e-06	5.14177e-06	5.36163e-06	6.01164e-06	7.01392e-06
1328.83	8.546	6.50391e-08	6.53555e-08	6.81568e-08	6.58598e-08	6.18022e-08	5.36237e-08	7.14319e-08	5.54851e-08	7.86604e-08	6.71217e-08	5.09804e-08	4.55952e-08	6.90474e-08	5.28996e-08	7.76738e-08	7.71263e-08	3.02425e-08
1337.25	8.546	2.73947e-06	3.00441e-06	2.99829e-06	3.01386e-06	2.9862e-06	2.97281e-06	2.9706e-06	2.94326e-06	2.90765e-06	2.85707e-06	2.82649e-06	2.88607e-06	2.86882e-06	2.92427e-06	3.16667e-06	3.34337e-06	3.45483e-06
1345.66	8.546	2.53704e-06	2.30425e-06	2.3149e-06	2.31432e-06	2.33168e-06	2.30293e-06	2.29916e-06	2.26617e-06	2.30286e-06	2.27807e-06	2.26079e-06	2.30899e-06	2.2463e-06	2.30675e-06	2.36611e-06	2.37336e-06	2.53983e-06
1354.08	8.546	1.87249e-07	1.87061e-07	1.32807e-07	1.81412e-07	1.48312e-07	2.51743e-07	1.65293e-07	1.44506e-07	1.31815e-07	1.88439e-07	1.34849e-07	1.5148e-07	1.39152e-07	1.17212e-07	1.65989e-07	1.51618e-07	1.54161e-07
1362.5	8.546	1.09797e-07	1.51341e-07	1.46042e-07	1.46228e-07	1.51882e-07	1.63853e-07	1.4206e-07	1.55638e-07	1.42932e-07	1.50889e-07	1.60755e-07	1.50508e-07	1.47381e-07	1.57402e-07	1.54049e-07	1.53121e-07	1.62999e-07
1370.91	8.546	6.98026e-07	9.1751e-07	8.34152e-07	8.20227e-07	8.56256e-07	8.31907e-07	8.53541e-07	8.44367e-07	8.47589e-07	8.55784e-07	8.38655e-07	8.52296e-07	8.8176e-07	8.86377e-07	8.79607e-07	9.51466e-07	9.90034e-07
1379.33	8.546	2.33951e-07	1.79171e-07	2.62789e-07	2.91961e-07	2.46521e-07	2.42306e-07	2.87884e-07	2.3438e-07	2.33462e-07	1.96199e-07	3.1541e-07	2.57491e-07	2.76234e-07	2.20484e-07	2.61683e-07	2.63082e-07	2.74476e-07
1387.75	8.546	4.02193e-08	7.36493e-09	1.85318e-08	3.08407e-08	1.70685e-08	1.89005e-08	6.09189e-08	2.37561e-08	1.7206e-08	1.42293e-08	1.93432e-08	4.85555e-08	2.00144e-08	2.89702e-08	2.04201e-08	2.27842e-08	3.3872e-08
1396.16	8.546	8.18415e-09	-4.98253e-09	-2.46165e-09	-4.40028e-09	-9.5723e-10	-5.7482e-09	4.74603e-09	-2.44929e-09	3.97405e-09	-6.15336e-10	-4.79972e-09	8.83999e-11	-5.94331e-09	3.09075e-08	3.5113e-09	1.40764e-08	-1.10693e-08
1404.58	8.546	-5.89472e-10	-1.58343e-09	-1.59235e-09	-1.88592e-09	1.77612e-09	1.78681e-09	1.79782e-09	-6.0372e-09	1.845e-09	-4.94134e-09	-2.64042e-09	-1.16389e-09	-8.41282e-09	-1.99531e-09	-3.43345e-09	-8.605e-10	-5.9241e-09
1413	8.546	0	-1.47346e-09	1.61669e-08	-3.80793e-09	-1.84081e-09	-1.66616e-10	-2.1355e-08	-1.02759e-09	-3.44496e-09	-2.20938e-08	-4.40338e-09	-1.25856e-09	-3.81838e-09	-9.19506e-10	-3.97273e-09	-1.30492e-08	-4.95449e-10
1421.41	8.546	1.29337e-23	1.62708e-08	1.79703e-09	9.78707e-09	8.16418e-09	1.57696e-09	1.77514e-08	3.29954e-09	6.18557e-13	2.69849e-08	2.09351e-08	1.8528e-08	3.20441e-08	2.20196e-08	1.14127e-08	1.06918e-08	1.26156e-08
1429.83	8.546	0.000121044	0.000122084	0.000121801	0.000121512	0.000121241	0.000120977	0.000120689	0.000120045	0.000119427	0.000118771	0.000117426	0.000115851	0.00011405	0.000110942	0.000104719	9.70907e-05	8.89012e-05
1438.25	8.546	0.00028153	0.000250129	0.000248874	0.000247651	0.000246405	0.000245107	0.000243842	0.000241312	0.000238817	0.000236212	0.000231118	0.000225979	0.000220152	0.000211182	0.000195399	0.000178183	0.000161445
1446.66	8.546	6.43714e-05	5.51488e-05	5.49598e-05	5.47507e-05	5.45975e-05	5.43421e-05	5.41399e-05	5.3754e-05	5.34075e-05	5.29999e-05	5.24797e-05	5.20135e-05	5.11321e-05	4.98696e-05	4.82752e-05	4.66313e-05	4.59686e-05
1455.08	8.546	2.76156e-06	2.71438e-06	2.67908e-06	2.72727e-06	2.72449e-06	2.68805e-06	2.70238e-06	2.69067e-06	2.69986e-06	2.69499e-06	2.68011e-06	2.74739e-06	2.79125e-06	2.80168e-06	2.89907e-06	3.14189e-06	3.27202e-06
1463.5	8.546	1.54631e-07	9.71607e-08	1.39989e-07	1.49886e-07	9.58066e-08	8.83193e-08	1.08646e-07	1.10099e-07	1.15911e-07	1.0984e-07	1.16511e-07	1.05836e-07	9.73321e-08	1.25607e-07	6.2374e-08	1.68674e-07	1.15962e-07
1471.91	8.546	1.03913e-05	1.0572e-05	1.05858e-05	1.06099e-05	1.0588e-05	1.06242e-05	1.06178e-05	1.06419e-05	1.07137e-05	1.07185e-05	1.08212e-05	1.09248e-05	1.10185e-05	1.11483e-05	1.1603e-05	1.21544e-05	1.31864e-05
1480.33	8.546	7.91527e-06	8.19525e-06	8.14533e-06	8.15075e-06	8.13965e-06	8.13194e-06	8.13346e-06	8.14771e-06	8.19149e-06	8.20199e-06	8.23147e-06	8.29771e-06	8.35047e-06	8.63272e-06	9.2979e-06	9.67058e-06	1.01185e-05
1488.75	8.546	9.42921e-07	9.37984e-07	9.45579e-07	9.41298e-07	9.30474e-07	9.23709e-07	9.22266e-07	9.50331e-07	9.17119e-07	9.35403e-07	9.39696e-07	9.93232e-07	9.93512e-07	1.00182e-06	9.33841e-07	1.10237e-06	1.10407e-06
1497.16	8.546	3.59842e-06	3.23922e-06	3.25768e-06	3.23588e-06	3.17387e-06	3.10862e-06	3.09379e-06	3.06724e-06	2.87671e-06	2.80824e-06	2.65059e-06	2.46259e-06	2.33594e-06	2.19273e-06	2.31238e-06	1.57529e-06	1.12232e-06
1505.58	8.546	1.23963e-07	1.51967e-07	1.19571e-07	1.36827e-07	1.52465e-07	1.50498e-07	1.64822e-07	1.39395e-07	1.21195e-07	1.86411e-07	1.40611e-07	1.8267e-07	1.63647e-07	1.55015e-07	2.13108e-07	1.83414e-07	1.87491e-07
1514	8.546	9.98681e-09	1.00044e-08	1.74872e-08	2.05799e-08	8.80169e-09	2.29293e-08	1.20008e-08	-2.06352e-09	1.08287e-08	2.22315e-08	2.15047e-08	1.465e-08	2.09416e-08	1.5062e-08	3.32246e-08	3.11855e-08	6.96983e-08
1522.41	8.546	1.34692e-06	1.22494e-06	1.22803e-06	1.1902e-06	1.1974e-06	1.17991e-06	1.15756e-06	1.14357e-06	1.08979e-06	1.11087e-06	1.13274e-06	1.18342e-06	1.06833e-06	1.0001e-06	7.35992e-07	3.04928e-07	2.71592e-07
1530.83	8.546	2.13942e-05	1.98958e-05	1.97118e-05	1.95874e-05	1.95114e-05	1.93399e-05	1.91611e-05	1.89592e-05	1.86319e-05	1.83285e-05	1.82484e-05	1.82241e-05	1.74129e-05	1.69153e-05	1.66585e-05	1.19381e-05	1.32197e-05
1539.25	8.546	3.45136e-05	3.32557e-05	3.30945e-05	3.29205e-05	3.27614e-05	3.26107e-05	3.24745e-05	3.2234e-05	3.20339e-05	3.19341e-05	3.17921e-05	3.20059e-05	3.0984e-05	2.98628e-05	2.94755e-05	2.43325e-05	2.6657e-05
1547.66	8.546	3.60378e-06	3.07674e-06	3.11253e-06	3.10003e-06	3.06471e-06	3.08975e-06	3.03056e-06	2.97461e-06	2.93115e-06	2.95256e-06	2.71212e-06	2.54667e-06	2.42876e-06	2.27956e-06	2.9225e-06	1.97731e-06	1.09452e-06
1556.08	8.546	2.44856e-07	2.75592e-07	2.86377e-07	2.5913e-07	2.741e-07	2.62245e-07	2.56924e-07	2.56741e-07	2.8014e-07	2.4727e-07	2.75914e-07	2.72102e-07	2.17916e-07	2.16442e-07	2.76774e-07	1.43997e-07	3.84508e-07
1564.5	8.546	5.74933e-06	5.03789e-06	4.98376e-06	4.93015e-06	4.89253e-06	4.83963e-06	4.78279e-06	4.70548e-06	4.75677e-06	4.84808e-06	4.93545e-06	4.88893e-06	4.61946e-06	4.02563e-06	4.04127e-06	3.97245e-06	6.73898e-06
1572.91	8.546	0.000217151	0.000249126	0.000247754	0.000246634	0.000245489	0.000244142	0.000243238	0.000240893	0.000239114	0.000237441	0.0002349	0.000233147	0.000227035	0.000219065	0.000207768	0.000181638	0.000171846
1581.33	8.546	0.00012985	0.000148837	0.00014809	0.000147295	0.000146561	0.000145986	0.000145272	0.000144011	0.000142909	0.000141842	0.000139908	0.000138636	0.000135208	0.000130242	0.000123493	0.000106688	0.000101723
1589.75	8.546	3.40641e-06	2.94693e-06	2.90535e-06	2.84717e-06	2.8307e-06	2.79586e-06	2.76649e-06	2.69523e-06	2.69136e-06	2.70295e-06	2.67478e-06	2.62065e-06	2.46298e-06	2.1503e-06	2.49295e-06	1.62906e-06	1.67356e-06
1598.16	8.546	8.72921e-05	9.74122e-05	9.6919e-05	9.65186e-05	9.60771e-05	9.55875e-05	9.51507e-05	9.44477e-05	9.37803e-05	9.31597e-05	9.23847e-05	9.22308e-05	8.93819e-05	8.53437e-05	7.95231e-05	6.48836e-05	6.20886e-05
1606.58	8.546	0.000184902	0.000218205	0.000217433	0.000216247	0.000215467	0.000214466	0.000213601	0.000212071	0.000210633	0.00020987	0.000207527	0.000206229	0.000201107	0.000192165	0.000183085	0.000157394	0.000148176
1615	8.546	6.75756e-05	7.19557e-05	7.12952e-05	7.07916e-05	7.02118e-05	7.002e-05	6.94577e-05	6.87398e-05	6.8065e-05	6.75973e-05	6.67508e-05	6.63547e-05	6.43522e-05	6.23056e-05	6.33529e-05	4.91824e-05	5.00556e-05
1623.41	8.546	5.52669e-06	4.35434e-06	4.21855e-06	4.18032e-06	4.02884e-06	4.02641e-06	3.66023e-06	3.51214e-06	3.04954e-06	3.1555e-06	2.81464e-06	2.57211e-06	1.9687e-06	1.45537e-06	5.93941e-07	1.11054e-06	4.22418e-07
1631.83	8.546	4.0293e-06	4.06166e-06	4.11475e-06	4.00291e-06	3.93184e-06	3.89382e-06	3.79262e-06	3.6349e-06	3.48647e-06	3.40035e-06	3.3705e-06	3.21261e-06	3.01958e-06	2.17016e-06	1.08239e-06	-1.7611e-06	-2.43639e-06
1640.25	8.546	3.00526e-05	2.83924e-05	2.81725e-05	2.79726e-05	2.78158e-05	2.76494e-05	2.74474e-05	2.72121e-05	2.70715e-05	2.68788e-05	2.67127e-05	2.69689e-05	2.62402e-05	2.54005e-05	2.53006e-05	1.92357e-05	2.22833e-05
1648.66	8.546	2.96359e-05	2.88689e-05	2.8764e-05	2.8645e-05	2.8589e-05	2.84881e-05	2.83952e-05	2.83215e-05	2.82819e-05	2.83298e-05	2.85926e-05	2.9187e-05	2.80895e-05	2.67748e-05	2.59766e-05	2.18359e-05	2.65208e-05
1657.08	8.546	5.69845e-06	5.11914e-06	5.03914e-06	4.98213e-06	4.91247e-06	4.86838e-06	5.01632e-06	4.9331e-06	4.91585e-06	4.857e-06	4.87593e-06	5.00712e-06	4.82e-06	4.09163e-06	5.06336e-06	5.01995e-06	6.83336e-06
1665.5	8.546	2.57359e-06	2.38379e-06	2.28888e-06	2.2566e-06	2.16104e-06	2.15246e-06	2.15306e-06	2.01193e-06	1.97244e-06	1.92298e-06	2.01346e-06	2.10128e-06	1.98745e-06	1.69225e-06	1.08669e-06	1.28971e-08	4.08177e-08
1673.91	8.546	6.68944e-07	5.89671e-07	6.14046e-07	5.98557e-07	5.97829e-07	5.96349e-07	5.98169e-07	5.80424e-07	5.90107e-07	5.6305e-07	5.73082e-07	5.74783e-07	5.9066e-07	6.07562e-07	5.16831e-07	3.93888e-07	5.51165e-07
1682.33	8.546	1.91386e-07	1.61404e-07	1.6677e-07	1.61595e-07	1.55056e-07	1.43162e-07	1.91286e-07	1.40287e-07	1.38487e-07	1.70567e-07	1.68083e-07	1.46515e-07	8.89613e-08	1.96537e-07	1.78997e-07	1.1164e-07	1.3896e-07
1690.75	8.546	4.71195e-08	3.73281e-08	1.22676e-08	3.0885e-08	5.53948e-08	2.88157e-08	5.24363e-08	6.16106e-08	4.79996e-08	4.85374e-08	6.21397e-08	4.48667e-08	1.71399e-08	2.5791e-08	6.41323e-08	3.00085e-08	5.19575e-08
1699.16	8.546	6.22884e-09	2.85347e-09	-2.54103e-09	8.73843e-09	6.04179e-10	2.29599e-08	1.70785e-08	9.44057e-09	2.20154e-08	3.09433e-08	3.5152e-08	1.32649e-08	1.13772e-08	9.15627e-09	-1.40217e-08	1.05378e-08	-1.13211e-08
1707.58	8.546	2.69191e-08	2.88616e-08	4.43362e-08	4.18369e-08	1.14175e-08	6.34197e-08	2.05463e-08	5.6468e-08	3.01064e-08	4.13074e-09	3.06527e-08	4.17152e-08	6.01457e-08	2.86016e-08	3.31698e-08	2.15246e-08	3.13056e-08
1716	8.546	6.34032e-09	8.20026e-09	2.89012e-09	5.98982e-09	4.16766e-09	4.63327e-09	9.76917e-09	1.01084e-08	-2.4527e-09	4.66421e-09	5.22928e-09	1.29212e-08	1.86973e-08	1.20728e-08	0	-7.46264e-09	-6.6692e-09
1724.41	8.546	1.59931e-08	1.8259e-08	3.57114e-09	2.01285e-08	2.68877e-08	2.56235e-08	0	0	3.16927e-08	2.25096e-08	0	5.69604e-09	1.37115e-08	1.07999e-08	5.88468e-08	9.83483e-09	-3.27889e-09
1732.83	8.546	0	-8.67717e-25	0	0	-4.34495e-24	0	0	0	0	1.51122e-09	0	0	0	1.90176e-09	0	8.67344e-09	4.1207e-09
1741.25	8.546	0	0	6.15833e-09	2.98113e-09	1.21721e-08	0	0	0	0	-1.80541e-08	4.69917e-09	7.2873e-09	0	0	0	-1.7468e-08	8.8903e-09
1749.66	8.546	2.96933e-08	2.82625e-08	2.47728e-08	1.99206e-08	2.93868e-08	2.22294e-08	3.96389e-08	1.19506e-08	2.26491e-08	1.67804e-08	2.70948e-08	3.43501e-08	-2.05263e-08	4.62879e-08	-8.30986e-09	1.31781e-08	4.27634e-08
1758.08	8.546	2.72956e-07	2.97839e-07	2.82854e-07	2.12778e-07	2.47359e-07	2.8348e-07	2.74579e-07	2.06598e-07	2.59808e-07	2.38935e-07	3.06106e-07	2.54138e-07	2.61922e-07	3.01518e-07	2.99885e-07	2.60022e-07	3.32003e-07
1766.5	8.546	1.4832e-07	1.21573e-07	1.29084e-07	1.01483e-07	1.10607e-07	1.24908e-07	8.65181e-08	1.28777e-07	9.45993e-08	9.70543e-08	1.45684e-07	8.62707e-08	1.1979e-07	6.8953e-08	1.30491e-07	1.19106e-07	1.22527e-07
1774.91	8.546	1.83179e-08	3.68598e-08	5.35529e-08	1.43071e-08	4.66122e-08	9.79592e-09	1.98815e-08	1.82992e-08	0	8.71953e-09	-3.63275e-24	4.22383e-08	1.62528e-08	1.84696e-08	-4.32497e-10	2.5814e-08	2.26057e-08
1783.33	8.546	9.24725e-08	1.47067e-07	1.0941e-07	9.98891e-08	1.12206e-07	1.27664e-07	1.22627e-07	1.12762e-07	6.41321e-08	1.30409e-07	1.52574e-07	1.03819e-07	6.67004e-08	1.32445e-07	1.54267e-07	1.76043e-07	2.01469e-07
1791.75	8.546	1.64756e-07	1.71627e-07	1.88338e-07	2.0821e-07	1.18051e-07	1.75314e-07	2.07671e-07	1.75414e-07	1.41341e-07	1.40054e-07	1.48149e-07	1.62876e-07	1.85921e-07	7.55564e-08	1.35534e-07	2.07148e-07	2.54256e-07
1800.16	8.546	6.99042e-08	1.0235e-07	9.75338e-08	1.2029e-07	8.62599e-08	5.8533e-08	4.66476e-08	1.27709e-07	1.20909e-07	4.96908e-08	3.18921e-08	7.60308e-08	5.16098e-08	1.60179e-07	1.12693e-07	9.8186e-08	1.25993e-07
1808.58	8.546	4.34637e-08	2.40369e-08	3.85502e-08	1.79593e-08	3.25671e-08	2.16149e-08	3.47513e-09	1.00586e-08	6.1756e-09	4.11283e-09	5.32683e-09	2.59233e-08	2.09142e-08	2.48705e-08	2.84966e-08	1.45747e-08	2.56151e-08
1817	8.546	-2.41605e-09	-2.45548e-08	-3.32697e-08	-1.64864e-08	-1.97963e-08	-2.94739e-08	-2.48387e-08	-3.0545e-08	-3.55335e-08	-2.85625e-08	-2.81291e-08	-2.80517e-08	-3.60959e-08	-3.62739e-08	-3.62e-08	-1.03846e-07	-5.30576e-08
1825.41	8.546	2.21585e-09	1.69909e-08	2.43714e-08	6.16576e-08	3.46715e-08	1.05753e-08	6.60477e-08	2.38127e-08	1.82328e-08	2.16442e-08	3.14396e-08	2.62487e-08	2.18848e-08	2.19466e-08	2.85518e-08	1.85203e-08	5.32418e-08
1833.83	8.546	5.96744e-08	1.21428e-07	1.19964e-07	1.21717e-07	1.21874e-07	1.22041e-07	1.22217e-07	1.22602e-07	1.06801e-07	1.23514e-07	1.28238e-07	1.02211e-07	1.31485e-07	1.35054e-07	1.11249e-07	1.22245e-07	1.10769e-07
1842.25	8.546	-1.63815e-09	-3.78418e-09	-3.7898e-09	-3.7957e-09	-4.18374e-08	-3.80852e-09	-3.81541e-09	-3.8303e-09	-3.84675e-09	-7.72974e-09	-4.68994e-08	-7.91591e-09	-4.02091e-09	-4.14316e-09	-4.44796e-09	-4.92589e-09	-5.3865e-09
1850.66	8.546	-4.35894e-08	-9.04989e-08	-9.06135e-08	-9.07338e-08	-9.08613e-08	-9.39778e-08	-9.41233e-08	-9.31529e-08	-9.34959e-08	-9.38745e-08	-9.47527e-08	-9.58162e-08	-9.53353e-08	-1.50625e-07	-1.03858e-07	-1.13062e-07	-1.2162e-07
1859.08	8.546	6.49638e-09	1.76323e-08	1.81854e-08	1.59784e-08	1.60067e-08	3.67472e-08	1.6068e-08	1.61361e-08	1.49554e-08	1.62953e-08	1.73155e-08	1.59579e-08	1.78765e-08	2.15643e-08	-4.7088e-09	2.6254e-08	2.23366e-08
1867.5	8.546	9.62988e-07	2.19895e-06	2.20444e-06	2.21858e-06	2.18955e-06	2.23895e-06	2.21921e-06	2.29533e-06	2.27155e-06	2.30745e-06	2.30928e-06	2.32085e-06	2.37004e-06	2.47101e-06	2.6568e-06	2.91549e-06	3.16659e-06
1875.91	8.546	2.44269e-05	2.41617e-05	2.41323e-05	2.4185e-05	2.41965e-05	2.41893e-05	2.41706e-05	2.41389e-05	2.42345e-05	2.42036e-05	2.42436e-05	2.42841e-05	2.42724e-05	2.44077e-05	2.45341e-05	2.51421e-05	2.56803e-05
1884.33	8.546	4.57606e-05	3.69633e-05	3.68972e-05	3.68753e-05	3.67788e-05	3.66687e-05	3.66163e-05	3.65168e-05	3.63994e-05	3.61636e-05	3.58687e-05	3.55336e-05	3.52245e-05	3.45901e-05	3.33229e-05	3.20033e-05	3.08921e-05
1892.75	8.546	6.95594e-06	1.21614e-05	1.22518e-05	1.22529e-05	1.22924e-05	1.23551e-05	1.23375e-05	1.24154e-05	1.25488e-05	1.26386e-05	1.28267e-05	1.30465e-05	1.33663e-05	1.38857e-05	1.49953e-05	1.69295e-05	1.86652e-05
1901.16	8.546	3.47219e-06	4.0582e-06	4.07962e-06	4.06827e-06	4.07996e-06	4.06504e-06	4.09312e-06	4.16902e-06	4.06804e-06	4.14927e-06	4.19379e-06	4.1198e-06	4.23278e-06	4.26779e-06	4.5561e-06	4.7241e-06	5.06591e-06
1909.58	8.546	1.90071e-06	3.53196e-06	3.51094e-06	3.57788e-06	3.58653e-06	3.60855e-06	3.61012e-06	3.59792e-06	3.53109e-06	3.58315e-06	3.627e-06	3.70419e-06	3.7433e-06	3.93836e-06	4.20388e-06	4.74422e-06	5.02898e-06
1918	8.546	6.06368e-07	6.70431e-07	6.58521e-07	6.95242e-07	6.64021e-07	6.46296e-07	7.32684e-07	6.70173e-07	6.7819e-07	6.4489e-07	7.09741e-07	7.46813e-07	6.89797e-07	6.67133e-07	7.10681e-07	9.90473e-07	9.87354e-07
1926.41	8.546	4.27073e-07	5.3927e-07	4.86873e-07	5.39852e-07	4.99569e-07	5.00301e-07	5.64661e-07	5.55913e-07	5.40939e-07	5.50867e-07	5.39437e-07	5.77696e-07	5.96855e-07	5.83443e-07	6.77012e-07	7.00782e-07	8.15115e-07
1934.83	8.546	6.41694e-06	6.00049e-06	5.81234e-06	5.86919e-06	5.85419e-06	5.82351e-06	5.78094e-06	5.75987e-06	5.76513e-06	5.88389e-06	5.85793e-06	5.94343e-06	6.00526e-06	6.20949e-06	6.50947e-06	7.07697e-06	7.92806e-06
1943.25	8.546	0.000287872	0.00023235	0.000231126	0.000229596	0.000228437	0.000226954	0.000225765	0.00022311	0.000220419	0.000217779	0.000212369	0.000207232	0.000201135	0.000192005	0.000176542	0.000160059	0.000144435
1951.66	8.546	0.00107164	0.000925313	0.000920256	0.000915206	0.000910105	0.000904989	0.000899715	0.000889161	0.000878566	0.000867763	0.000845644	0.000823074	0.000799708	0.000761893	0.000688901	0.000615905	0.000537627
1960.08	8.546	0.00113309	0.00099336	0.000989121	0.000984871	0.000980589	0.000976369	0.000972014	0.000963338	0.000954618	0.000945693	0.000927487	0.000908945	0.000887746	0.000853513	0.000786688	0.00071452	0.000638403
1968.5	8.546	0.00088403	0.000804021	0.000800367	0.000796817	0.000793339	0.000789827	0.000786331	0.000779258	0.000772373	0.000765542	0.000751871	0.000738036	0.000723382	0.000701203	0.000661539	0.000621035	0.000578471
1976.91	8.546	0.000226295	0.000244989	0.000243754	0.000242441	0.000241246	0.000239998	0.000238505	0.000236173	0.00023385	0.000231437	0.000226766	0.000222279	0.000215772	0.000205022	0.00018451	0.000156312	0.000130369
1985.33	8.546	3.78811e-05	3.49547e-05	3.4813e-05	3.46257e-05	3.4838e-05	3.46006e-05	3.47241e-05	3.44354e-05	3.46653e-05	3.48791e-05	3.50287e-05	3.58463e-05	3.54565e-05	3.46336e-05	3.51348e-05	3.07426e-05	3.64172e-05
1993.75	8.546	0.000184968	0.000186849	0.000186237	0.000185296	0.000184776	0.000184082	0.000183529	0.000182455	0.000181393	0.000180445	0.000178884	0.000177663	0.00017459	0.000170431	0.000162893	0.000150875	0.000147977
2002.16	8.546	0.00263082	0.00217423	0.00216349	0.00215255	0.00214148	0.00213036	0.00211907	0.00209628	0.00207289	0.00204898	0.00199949	0.00194739	0.00189592	0.00181158	0.0016438	0.00147973	0.00131593
2010.58	8.546	0.00276955	0.00236529	0.00235379	0.00234207	0.00232998	0.00231819	0.00230602	0.00228123	0.00225579	0.00222963	0.00217478	0.0021158	0.00206148	0.00197103	0.00178235	0.00160768	0.00140723
2019	8.546	0.00183576	0.00159446	0.00158724	0.00157992	0.00157248	0.00156507	0.00155768	0.00154253	0.00152733	0.00151155	0.00147917	0.00144524	0.0014127	0.00135884	0.00124957	0.00114816	0.00102575
2027.41	8.546	0.000538544	0.000535241	0.000532275	0.000529564	0.000526973	0.000524298	0.000521608	0.000516296	0.000511212	0.000506035	0.000495827	0.000485464	0.00047366	0.000455896	0.000420571	0.000374213	0.000333809
2035.83	8.546	0.000271035	0.00026028	0.000259089	0.000257324	0.000256113	0.000254619	0.000253458	0.000250959	0.000249031	0.000247266	0.000245146	0.000244663	0.00023806	0.000229506	0.000224798	0.000187213	0.000202315
2044.25	8.546	0.000369731	0.000392845	0.000391033	0.000388899	0.000387438	0.000385869	0.000384319	0.000381086	0.000377819	0.000374928	0.000370367	0.000367891	0.000360208	0.000348724	0.000329954	0.000287339	0.000274595
2052.66	8.546	0.00106095	0.00104497	0.00104027	0.00103548	0.00103054	0.00102553	0.00102054	0.00100985	0.00099935	0.000988065	0.000964666	0.000939177	0.000919334	0.000886865	0.000816632	0.00076088	0.000690769
2061.08	8.546	0.000728237	0.000732547	0.000729134	0.000725724	0.00072235	0.000719063	0.000715617	0.000708638	0.000701967	0.000694377	0.000680394	0.000665186	0.000650587	0.000626009	0.000576074	0.00052476	0.000469933
2069.49	8.546	0.000786422	0.000765164	0.000761312	0.000757248	0.000753291	0.000749649	0.000745874	0.000738095	0.000730148	0.000722191	0.000705344	0.000687801	0.000672874	0.000648488	0.000599207	0.000549205	0.000498038
2077.91	8.546	0.000425106	0.00043862	0.000436484	0.00043445	0.000432266	0.000430333	0.00042828	0.000424795	0.000421538	0.000418188	0.000412315	0.000407741	0.000398324	0.000383639	0.000361785	0.000315916	0.00029694
2086.33	8.546	0.000307851	0.000306999	0.000305392	0.000303542	0.000301737	0.000300054	0.000298624	0.000295438	0.000293122	0.000290522	0.000286933	0.000285042	0.000276152	0.000263704	0.000247764	0.000208777	0.000210232
2094.74	8.546	0.000125013	0.000116293	0.0001153	0.000114451	0.000113637	0.00011293	0.000112124	0.000110741	0.000109575	0.000108661	0.000107699	0.000108254	0.000103606	9.8286e-05	9.80582e-05	6.53486e-05	8.73178e-05
2103.16	8.546	4.40327e-05	4.32252e-05	4.31728e-05	4.31986e-05	4.31471e-05	4.28465e-05	4.28197e-05	4.2589e-05	4.36433e-05	4.37113e-05	4.53829e-05	4.56155e-05	4.38686e-05	4.18365e-05	3.87515e-05	2.22926e-05	4.74912e-05
2111.58	8.546	2.99536e-05	2.79432e-05	2.77391e-05	2.76071e-05	2.77715e-05	2.75143e-05	2.747e-05	2.74691e-05	2.74203e-05	2.68111e-05	2.70166e-05	2.76766e-05	2.7508e-05	2.6629e-05	2.11286e-05	1.2766e-05	9.43166e-06
2119.99	8.546	9.51207e-06	7.90668e-06	7.71469e-06	7.14213e-06	7.12193e-06	6.40919e-06	6.10794e-06	5.88746e-06	5.3244e-06	4.89062e-06	4.27855e-06	3.77976e-06	3.34106e-06	3.15785e-06	4.29275e-06	-2.24201e-06	3.66116e-07
2128.41	8.546	2.6259e-06	2.40755e-06	2.28804e-06	2.08746e-06	2.0344e-06	1.76217e-06	1.79269e-06	1.69158e-06	1.64709e-06	1.65733e-06	1.58594e-06	1.52718e-06	1.1603e-06	8.51861e-07	3.60765e-07	-2.81174e-06	-2.57989e-06
2136.83	8.546	1.704e-06	1.50145e-06	1.48954e-06	1.4687e-06	1.4201e-06	1.40952e-06	1.34721e-06	1.18099e-06	9.09014e-07	8.43162e-07	5.7911e-07	3.31452e-07	3.20807e-08	-4.46034e-07	-1.29154e-06	-4.49749e-06	-5.44153e-06
2145.24	8.546	9.13932e-06	7.66228e-06	7.90389e-06	7.29184e-06	7.50381e-06	6.92003e-06	7.29061e-06	6.91799e-06	6.63307e-06	6.36831e-06	5.60513e-06	5.68102e-06	5.42165e-06	6.58962e-06	1.26803e-05	1.83482e-05	3.69388e-05
2153.66	8.546	1.29149e-05	1.20902e-05	1.16354e-05	1.15217e-05	1.15756e-05	1.15136e-05	1.0878e-05	1.061e-05	1.03065e-05	1.00853e-05	9.57281e-06	9.34418e-06	9.1219e-06	9.14126e-06	1.09328e-05	6.94121e-06	1.11826e-05
2162.08	8.546	1.40026e-05	1.14127e-05	1.12226e-05	1.10138e-05	1.08331e-05	1.06248e-05	1.03205e-05	1.00232e-05	9.50976e-06	9.22935e-06	8.42963e-06	7.8446e-06	6.32558e-06	4.11351e-06	1.56418e-08	1.00377e-05	3.66204e-05
2170.49	8.546	6.43167e-06	6.09828e-06	6.06838e-06	6.20574e-06	5.66553e-06	5.56793e-06	5.45656e-06	5.34474e-06	5.12622e-06	4.91069e-06	4.00422e-06	3.99626e-06	3.22861e-06	1.06324e-06	-2.25065e-06	-1.07819e-05	-1.69197e-05
2178.91	8.546	1.30901e-06	9.88873e-07	8.40006e-07	9.76456e-07	8.95095e-07	9.05726e-07	8.12163e-07	7.42442e-07	8.06093e-07	7.90146e-07	6.91862e-07	7.07708e-07	6.11102e-07	4.3908e-07	1.7466e-07	-1.15975e-06	-1.15405e-06
2187.33	8.546	9.33897e-07	8.30478e-07	8.42979e-07	7.83119e-07	7.9871e-07	7.72111e-07	8.29588e-07	8.86016e-07	8.47018e-07	7.74994e-07	7.99738e-07	7.16261e-07	8.197e-07	7.92415e-07	8.53849e-07	4.82275e-07	1.03131e-06
2195.74	8.546	3.90467e-07	4.69695e-07	3.17689e-07	3.87122e-07	3.13639e-07	3.69331e-07	4.17329e-07	3.23504e-07	3.53426e-07	4.20377e-07	3.17949e-07	2.46495e-07	3.90159e-07	3.99192e-07	4.65304e-07	3.62278e-07	7.67058e-07
2204.16	8.546	9.19317e-08	1.1792e-07	1.14115e-07	0	1.00126e-07	3.07882e-08	7.70661e-08	1.62184e-08	6.43965e-08	5.44815e-08	6.26655e-08	4.58993e-08	5.41607e-08	5.71757e-08	6.9304e-08	5.03416e-08	6.01883e-08
2212.58	8.546	3.20711e-07	2.27645e-07	4.0251e-07	2.07938e-07	3.68484e-07	3.53966e-07	4.30562e-07	1.90932e-07	3.97832e-07	2.90239e-07	2.98637e-07	4.25758e-07	3.16559e-07	3.06381e-07	3.02995e-07	1.58386e-07	3.54845e-07
2220.99	8.546	1.95629e-07	1.81048e-07	2.54475e-07	1.54318e-07	2.63703e-07	1.51754e-07	1.79799e-07	1.51351e-07	1.44908e-07	2.81945e-07	3.0727e-07	1.05821e-07	1.89532e-07	1.69443e-07	1.76686e-07	1.01099e-07	1.85551e-07
2229.41	8.546	1.27185e-07	2.61898e-07	1.25563e-07	1.28005e-07	2.07886e-07	4.28579e-08	1.22497e-07	1.44326e-07	1.1643e-07	4.0159e-08	1.52095e-07	1.24376e-07	1.10671e-07	1.11267e-07	1.26063e-07	2.71794e-08	1.67166e-07
2237.83	8.546	2.12116e-08	0	5.38388e-08	0	0	-4.72304e-24	4.07584e-08	1.17657e-08	2.03735e-08	0	2.54347e-24	1.66761e-08	2.06602e-08	4.23572e-08	-3.74425e-09	7.54345e-09	1.09258e-09
2246.24	8.546	8.46464e-08	0	0	4.70106e-08	1.22082e-07	4.31472e-08	1.29055e-07	5.05661e-08	3.16292e-08	1.19632e-07	6.09328e-08	6.89727e-08	6.21585e-08	6.21473e-08	7.92463e-08	1.50443e-08	5.45532e-08
2254.66	8.546	2.2562e-07	3.02515e-23	1.67532e-07	2.73921e-07	3.30401e-07	1.56333e-07	1.58486e-07	4.63628e-07	1.99121e-07	8.95603e-08	9.83562e-08	1.86428e-07	1.68693e-07	1.88886e-07	1.81485e-07	1.64408e-07	2.06852e-08
2263.08	8.546	9.9932e-08	2.83466e-07	1.40255e-07	1.00161e-07	5.41644e-08	9.44814e-08	3.92027e-08	2.38054e-08	1.61675e-07	3.47623e-08	1.07383e-07	7.32859e-08	6.97219e-08	5.93064e-08	7.5819e-08	7.41859e-08	6.55911e-08
2271.49	8.546	1.01906e-07	4.79755e-08	6.28249e-08	1.58354e-08	9.81038e-08	3.77849e-09	1.85297e-07	1.73742e-08	9.0008e-08	1.29877e-08	3.46051e-08	3.32934e-08	5.01918e-08	5.87975e-08	6.93799e-08	6.44446e-08	-1.56684e-08
2279.91	8.546	9.18695e-08	1.01484e-07	2.72905e-08	4.55568e-08	1.03739e-07	9.03942e-08	5.43732e-08	4.33008e-09	1.06246e-07	5.02888e-09	2.73841e-08	4.47004e-08	5.94426e-08	7.96429e-08	4.18009e-08	5.55535e-08	3.10943e-08
2288.33	8.546	1.5975e-08	-4.3971e-09	0	0	0	2.95966e-08	6.5386e-09	0	4.27623e-09	-1.84213e-08	9.33076e-09	2.9591e-08	1.89262e-08	1.83372e-08	-5.8295e-09	2.48798e-08	-1.56492e-08
2296.74	8.546	1.46542e-08	0	0	0	0	0	0	0	5.02879e-09	-4.56314e-08	1.03471e-08	9.2692e-09	5.15225e-09	2.06235e-08	2.17e-08	-8.16894e-08	8.96153e-08
2305.16	8.546	1.40408e-08	-6.51437e-09	0	0	2.49504e-08	0	-1.37015e-08	-1.43812e-08	6.20022e-08	0	-1.73845e-09	-5.63489e-09	5.96376e-09	3.25861e-09	5.20362e-08	2.2576e-08	7.76412e-24
2313.58	8.546	0	0	-9.69615e-09	8.48025e-08	0	7.22748e-08	3.13032e-08	5.23272e-09	5.87729e-09	0	-3.41959e-10	3.16509e-08	3.11149e-09	0	-2.28075e-08	6.12038e-11	-6.3186e-09
2321.99	8.546	0	0	0	0	0	0	0	1.10423e-08	7.04289e-09	1.37334e-08	0	-3.21411e-09	-1.86393e-08	0	0	1.91956e-08	1.01867e-07
2330.41	8.546	0	-2.84286e-23	0	0	0	0	0	0	-4.19862e-09	0	5.11778e-09	0	4.82984e-09	0	6.39201e-24	-5.12537e-08	0
2338.83	8.546	0	0	0	0	0	-7.03144e-08	0	0	9.17229e-09	0	-5.58693e-09	2.43571e-08	5.92379e-09	0	-4.68977e-08	0	8.10179e-08
2347.24	8.546	0	0	0	0	-6.51168e-09	0	0	0	0	3.1975e-08	9.56229e-09	-1.52521e-09	0	0	0	0	0
2355.66	8.546	0	-3.54509e-08	-4.25379e-09	0	0	0	0	0	-3.3945e-09	-1.38597e-09	3.70571e-09	1.42889e-08	3.96614e-08	-8.49191e-09	0	-1.66558e-08	-2.76844e-08
2364.08	8.546	0	-5.74514e-08	0	0	-1.99285e-09	0	0	-9.03081e-08	0	7.38178e-09	9.73734e-09	1.3541e-08	-1.02176e-08	5.49946e-09	0	-4.89855e-24	6.33941e-09
2372.49	8.546	0	7.15804e-08	0	0	-1.16888e-09	8.99285e-09	0	0	0	4.7527e-09	-2.88142e-09	0	5.70052e-09	9.25987e-09	1.30055e-23	-1.74725e-08	-1.73688e-09
2380.91	8.546	0	0	0	-1.0208e-08	3.04502e-09	0	0	-1.36601e-09	-1.03394e-08	0	2.1916e-09	7.4849e-09	0	5.24281e-09	0	-2.03274e-08	-2.13311e-09
2389.33	8.546	0	-6.28706e-09	2.17482e-08	2.20683e-24	0	0	0	0	-2.33763e-09	9.08331e-09	-2.81782e-09	1.57952e-08	9.26419e-09	-1.58085e-09	-6.45445e-08	0	-1.17908e-08
2397.74	8.546	0	0	0	0	0	0	1.07187e-08	-6.6487e-09	3.6431e-09	2.60987e-09	-2.4187e-09	0	2.0696e-08	0	3.12983e-08	4.26861e-08	1.53766e-07
2406.16	8.546	3.14411e-08	1.13172e-08	0	1.50704e-08	0	0	2.21712e-24	5.3113e-08	0	3.4121e-09	-1.267e-09	-3.24378e-09	1.23715e-08	4.51333e-24	1.99309e-09	0	1.14952e-08
2414.58	8.546	0	0	0	0	5.21457e-09	0	4.72224e-09	0	0	0	9.34732e-09	7.24098e-09	2.58507e-08	0	3.9496e-08	0	1.48467e-08
2422.99	8.546	0	0	8.35194e-08	0	0	1.17553e-08	1.12949e-08	0	1.01648e-08	8.02351e-09	-1.09667e-08	-1.49678e-08	1.36253e-08	-1.52987e-09	-1.05743e-08	2.05774e-09	1.24375e-08
2431.41	8.546	0	0	0	4.72619e-09	6.4053e-09	0	0	0	1.84799e-08	5.45589e-10	0	5.32102e-09	8.59836e-09	2.5471e-08	1.23238e-08	8.61984e-09	1.55031e-09
2439.83	8.546	0	0	0	0	0	3.41411e-23	0	0	1.00947e-24	7.96317e-09	0	3.68553e-09	-2.37407e-09	-1.67926e-24	3.4386e-08	-8.37665e-09	-2.68473e-08
2448.24	8.546	0	3.76221e-09	0	6.82692e-09	0	7.25159e-09	7.8984e-09	8.33026e-09	0	-4.21842e-25	1.8827e-08	2.75643e-09	0	0	1.76923e-08	1.62361e-09	-1.32461e-08
2456.66	8.546	0	4.36344e-09	0	0	2.77532e-09	6.54334e-08	0	5.58083e-08	1.97371e-08	0	1.9102e-08	-3.07807e-24	2.9048e-08	2.3089e-08	2.02045e-08	1.06026e-08	1.17863e-09
2465.08	8.546	7.83105e-09	5.2593e-08	3.26019e-08	3.52098e-09	1.90823e-08	6.42393e-09	2.69798e-08	6.62056e-09	1.83788e-08	5.08667e-08	1.11962e-08	4.25815e-08	2.99161e-08	8.5054e-09	2.47856e-08	8.31622e-09	9.38823e-08
2473.49	8.546	9.06347e-08	2.29146e-08	8.5005e-09	3.36518e-08	2.88416e-08	3.70668e-08	3.71033e-08	3.15699e-08	2.22953e-08	4.04588e-08	3.0306e-08	2.19604e-09	7.77999e-08	2.42003e-08	1.16507e-07	-5.18426e-08	-2.38664e-09
2481.91	8.546	2.03643e-06	2.49696e-06	2.53038e-06	2.51684e-06	2.56249e-06	2.53645e-06	2.56243e-06	2.58794e-06	2.63651e-06	2.71791e-06	2.76801e-06	2.82561e-06	2.90044e-06	3.02108e-06	3.8444e-06	5.2457e-06	7.33815e-06
2490.33	8.546	3.83332e-06	4.0131e-06	3.97414e-06	3.98639e-06	4.01639e-06	3.9997e-06	4.00828e-06	4.03934e-06	4.08507e-06	4.07681e-06	4.1339e-06	4.13478e-06	4.29972e-06	4.51057e-06	5.14303e-06	6.64141e-06	8.62669e-06
2498.74	8.546	1.86651e-06	1.91353e-06	1.89462e-06	1.91196e-06	1.93422e-06	1.90344e-06	1.89282e-06	1.88998e-06	1.8916e-06	1.88432e-06	1.92603e-06	1.96142e-06	1.93259e-06	1.97794e-06	2.13668e-06	2.49734e-06	2.82662e-06
2507.16	8.546	1.05562e-06	9.45077e-07	9.76517e-07	9.29238e-07	9.54132e-07	9.23846e-07	9.66706e-07	9.4167e-07	9.29583e-07	9.33371e-07	1.04488e-06	9.51413e-07	1.03356e-06	1.00193e-06	1.08645e-06	1.22068e-06	1.50779e-06
2515.58	8.546	2.01132e-06	1.49859e-06	1.49842e-06	1.5536e-06	1.45973e-06	1.47341e-06	1.44063e-06	1.48318e-06	1.52803e-06	1.3791e-06	1.41909e-06	1.31944e-06	1.42124e-06	1.53395e-06	1.37406e-06	1.43137e-06	1.47912e-06

## Sheet: k_GF5A
Wavelength	FWHM	k_Summer_L	k_Summer_M	k_Summer_H	k_Winter_L	k_Winter_M	k_Winter_H	k_1976_L	k_1976_M	k_1976_H
1014.15	8.25	0	0	0	0	0	0	0	0	0	0	0	0	0	0	0	0	0
1022.56	8.25	0	0	0	0	0	0	0	0	0	0	0	0	0	0	0	0	0
1030.98	8.25	0	0	0	0	0	0	0	0	0	0	0	-1.25306e-09	0	0	0	0	0
1039.4	8.25	6.81341e-07	5.94093e-07	5.40476e-07	5.67805e-07	5.53989e-07	5.46274e-07	4.85869e-07	5.10931e-07	5.55188e-07	5.91713e-07	5.2606e-07	5.2883e-07	5.2108e-07	5.03268e-07	4.9312e-07	4.33182e-07	4.5614e-07
1047.81	8.25	8.40707e-07	6.43639e-07	6.55157e-07	6.48643e-07	6.2774e-07	6.25617e-07	6.09242e-07	5.72606e-07	5.43792e-07	5.0044e-07	4.15194e-07	3.61483e-07	2.26862e-07	-9.29679e-10	-3.5311e-07	-7.06313e-07	-8.61811e-07
1056.23	8.25	4.59954e-07	4.61411e-07	4.36413e-07	4.28444e-07	4.04588e-07	4.43697e-07	4.09493e-07	4.6623e-07	3.72396e-07	3.14725e-07	2.83976e-07	2.43371e-07	2.21825e-07	1.82233e-07	1.14575e-07	-6.55122e-09	-5.83716e-08
1064.65	8.25	2.94473e-07	2.87052e-07	3.4716e-07	2.61562e-07	2.24848e-07	3.45666e-07	2.95899e-07	2.22555e-07	2.33654e-07	3.00513e-07	2.62101e-07	2.68776e-07	2.46947e-07	2.47398e-07	2.38388e-07	2.24261e-07	2.14564e-07
1073.06	8.25	4.39767e-08	4.54864e-08	6.8144e-08	8.5421e-09	4.28385e-08	4.06516e-08	0	7.71876e-08	1.96995e-08	2.25103e-08	3.76896e-08	3.30136e-08	3.88873e-08	3.88896e-08	2.9316e-08	3.13874e-08	2.35023e-08
1081.48	8.25	8.82546e-09	0	0	1.71566e-08	1.07987e-08	2.06152e-09	0	0	9.12732e-26	1.5576e-08	4.35117e-09	-1.28464e-10	4.25863e-09	4.74421e-09	2.93974e-09	2.7911e-09	9.27168e-09
1089.9	8.25	0	0	0	-9.83885e-25	0	0	4.7806e-09	0	0	3.73275e-09	3.75906e-09	7.09845e-09	0	-4.24474e-10	3.30749e-09	2.11398e-09	-2.57059e-09
1098.31	8.25	0	0	0	0	0	6.26182e-10	0	1.54603e-09	2.0227e-09	4.7592e-10	9.37637e-10	4.72093e-10	-5.79573e-10	-3.26055e-09	-4.8624e-09	-1.3564e-08	-5.05907e-09
1106.73	8.25	0	0	0	0	0	0	0	0	6.92688e-10	0	0	0	0	0	0	0	0
1115.15	8.25	2.95347e-09	4.13082e-09	4.50258e-09	8.32199e-10	6.1711e-10	1.63608e-09	0	3.43608e-09	7.51858e-10	-1.33293e-09	4.37818e-09	9.00904e-10	-2.5648e-09	3.80487e-09	-5.972e-10	-6.4525e-09	0
1123.56	8.25	0	0	0	0	0	0	-1.51708e-09	0	0	0	0	0	0	4.62318e-09	-5.33058e-09	0	0
1131.98	8.25	4.95321e-09	4.84751e-09	1.35328e-09	1.08487e-09	0	-1.27387e-09	2.578e-09	0	3.33603e-09	1.61711e-09	4.30005e-09	0	7.07735e-11	-4.51964e-09	3.74336e-09	4.69364e-09	4.43768e-09
1140.4	8.25	0	0	0	0	0	0	0	0	0	0	0	0	0	-1.12686e-09	-1.53375e-25	0	0
1148.81	8.25	0	0	-1.99385e-09	0	0	0	0	0	3.82521e-09	0	0	0	0	0	0	0	5.35462e-09
1157.23	8.25	0	0	0	0	0	0	0	-1.51406e-09	0	0	0	0	-4.20404e-09	0	0	0	0
1165.65	8.25	0	0	0	0	0	0	0	0	0	0	0	-4.48456e-10	0	0	0	0	0
1174.06	8.25	0	0	0	0	0	0	0	0	0	0	0	0	0	0	0	0	0
1182.48	8.25	0	0	0	0	0	0	0	0	0	0	0	0	0	0	0	0	0
1190.9	8.25	0	0	2.30731e-09	1.04894e-09	0	0	-9.49578e-10	0	2.68939e-09	0	0	0	-7.81932e-10	0	0	3.73331e-09	0
1199.31	8.25	6.19124e-07	5.56472e-07	5.53874e-07	5.59542e-07	5.50457e-07	5.44263e-07	5.38897e-07	5.42824e-07	5.29079e-07	5.31583e-07	5.18277e-07	5.13752e-07	5.026e-07	4.94977e-07	4.87108e-07	4.26661e-07	4.17421e-07
1207.73	8.25	3.79525e-05	3.58345e-05	3.56618e-05	3.55075e-05	3.54204e-05	3.52571e-05	3.51319e-05	3.49052e-05	3.47158e-05	3.44899e-05	3.41646e-05	3.40247e-05	3.31809e-05	3.22022e-05	3.16009e-05	2.90436e-05	2.89326e-05
1216.15	8.25	1.48043e-05	1.34619e-05	1.33903e-05	1.33028e-05	1.3239e-05	1.31587e-05	1.30776e-05	1.2938e-05	1.27876e-05	1.26905e-05	1.25459e-05	1.2483e-05	1.21317e-05	1.17934e-05	1.16367e-05	9.99692e-06	1.01339e-05
1224.56	8.25	1.63077e-05	1.49873e-05	1.49005e-05	1.48365e-05	1.47781e-05	1.47176e-05	1.466e-05	1.45325e-05	1.43951e-05	1.4318e-05	1.42269e-05	1.42194e-05	1.37832e-05	1.32606e-05	1.27701e-05	1.12901e-05	1.1752e-05
1232.98	8.25	1.68604e-06	1.48589e-06	1.47596e-06	1.47139e-06	1.45783e-06	1.45064e-06	1.43828e-06	1.42708e-06	1.42001e-06	1.40273e-06	1.39487e-06	1.39649e-06	1.34809e-06	1.30008e-06	1.28326e-06	1.11943e-06	1.20093e-06
1241.4	8.25	3.16547e-07	3.46318e-07	3.38239e-07	3.29939e-07	3.17487e-07	3.38774e-07	3.28937e-07	3.13706e-07	3.13511e-07	3.19981e-07	3.07612e-07	2.98574e-07	3.04795e-07	3.02737e-07	2.83958e-07	2.76446e-07	2.87261e-07
1249.81	8.25	2.30378e-07	1.3416e-07	1.31779e-07	1.33534e-07	1.38212e-07	1.37866e-07	1.28976e-07	1.33408e-07	1.28942e-07	1.27635e-07	1.30564e-07	1.31767e-07	1.30218e-07	1.27482e-07	1.09138e-07	1.28468e-07	1.0595e-07
1258.23	8.25	2.18975e-07	1.81839e-07	1.73357e-07	1.79573e-07	1.96381e-07	1.76696e-07	1.73149e-07	1.81965e-07	1.75705e-07	1.79563e-07	1.84724e-07	1.68795e-07	1.60005e-07	1.45461e-07	1.75956e-07	1.44242e-07	1.28726e-07
1266.65	8.25	2.14499e-07	1.97003e-07	2.03417e-07	2.05394e-07	1.87301e-07	1.919e-07	2.04415e-07	1.951e-07	1.95437e-07	2.07097e-07	1.98157e-07	1.87172e-07	1.81339e-07	2.04249e-07	2.44549e-07	1.88195e-07	2.23803e-07
1275.06	8.25	0	4.38954e-10	3.10323e-09	8.72737e-10	1.86568e-09	-4.86134e-10	4.1625e-09	-3.49266e-10	1.54715e-09	7.78359e-09	0	-3.00568e-09	0	-4.93253e-09	2.16753e-09	1.13143e-08	6.90494e-09
1283.48	8.25	3.3261e-08	5.21493e-08	5.88776e-08	5.01332e-08	4.97873e-08	5.35011e-08	5.47838e-08	5.22871e-08	5.18098e-08	6.42656e-08	3.86343e-08	4.4163e-08	6.15335e-08	3.5992e-08	4.77184e-08	2.1161e-08	6.62754e-08
1291.9	8.25	2.26324e-06	1.92321e-06	1.92072e-06	1.9046e-06	1.87495e-06	1.88976e-06	1.93427e-06	1.89871e-06	1.9575e-06	1.91594e-06	2.03611e-06	2.0868e-06	2.10374e-06	1.95582e-06	1.37732e-06	-1.53904e-07	-1.99175e-06
1300.31	8.25	3.2684e-07	2.83261e-07	2.79e-07	2.88096e-07	2.95715e-07	2.87631e-07	2.86308e-07	2.68294e-07	2.81803e-07	2.57469e-07	2.77343e-07	2.55315e-07	2.71092e-07	2.42264e-07	2.52321e-07	2.0937e-07	2.66112e-07
1308.73	8.25	1.36305e-07	1.49968e-07	1.57067e-07	1.48265e-07	1.50687e-07	1.57207e-07	1.47048e-07	1.47478e-07	1.48312e-07	1.39672e-07	1.2749e-07	1.53161e-07	1.23299e-07	1.38445e-07	1.54846e-07	1.3099e-07	1.49896e-07
1317.15	8.25	8.83679e-06	8.52488e-06	8.50545e-06	8.46984e-06	8.46451e-06	8.4195e-06	8.42918e-06	8.37886e-06	8.32576e-06	8.27185e-06	8.24733e-06	8.18331e-06	7.91634e-06	7.69871e-06	7.63612e-06	8.39691e-06	1.03756e-05
1325.56	8.25	6.99752e-07	5.47927e-07	5.48985e-07	5.45301e-07	5.45064e-07	5.38611e-07	5.41194e-07	5.25242e-07	5.23313e-07	5.17429e-07	4.50961e-07	3.8656e-07	3.36456e-07	2.55006e-07	3.14443e-07	2.12708e-07	-1.97832e-07
1333.98	8.25	1.09839e-06	1.13129e-06	1.12762e-06	1.11816e-06	1.11778e-06	1.1049e-06	1.10498e-06	1.06488e-06	1.07746e-06	1.00598e-06	9.8311e-07	1.0371e-06	1.01325e-06	1.01986e-06	1.11238e-06	1.15709e-06	1.11994e-06
1342.4	8.25	3.19359e-06	3.16493e-06	3.17484e-06	3.20836e-06	3.17051e-06	3.1686e-06	3.1632e-06	3.17491e-06	3.13176e-06	3.14877e-06	3.10066e-06	3.11905e-06	3.0633e-06	3.1256e-06	3.16415e-06	3.22248e-06	3.40415e-06
1350.81	8.25	3.68188e-07	3.39639e-07	2.78859e-07	3.05678e-07	3.44386e-07	3.4144e-07	2.85161e-07	2.62195e-07	3.43307e-07	2.95271e-07	2.43586e-07	3.18373e-07	3.18096e-07	2.92442e-07	4.04807e-07	2.63623e-07	3.23715e-07
1359.23	8.25	7.73357e-08	9.04373e-08	8.7465e-08	9.73226e-08	9.20664e-08	1.08206e-07	1.50037e-07	9.10242e-08	8.91169e-08	1.41373e-07	1.03249e-07	9.51025e-08	8.33202e-08	9.36725e-08	9.2151e-08	1.20169e-07	1.14891e-07
1367.65	8.25	5.23405e-07	6.24354e-07	6.25465e-07	6.20493e-07	6.10461e-07	6.33185e-07	6.19238e-07	6.3807e-07	6.20358e-07	6.33329e-07	6.21295e-07	6.3579e-07	6.40494e-07	6.39879e-07	6.29755e-07	6.53621e-07	6.7477e-07
1376.06	8.25	3.32519e-07	3.79933e-07	4.12953e-07	4.46323e-07	4.41508e-07	4.16148e-07	4.40128e-07	4.07407e-07	4.01397e-07	3.439e-07	4.91004e-07	4.08721e-07	4.83272e-07	4.10605e-07	4.48875e-07	4.8297e-07	5.24502e-07
1384.48	8.25	9.57389e-08	3.00362e-08	4.23641e-08	4.38298e-08	4.43542e-08	4.6505e-08	3.93103e-08	3.59688e-08	4.28697e-08	4.58485e-08	4.3576e-08	4.21317e-08	5.72492e-08	5.19958e-08	5.29437e-08	5.3293e-08	6.12316e-08
1392.9	8.25	9.69286e-09	-1.42658e-08	-5.46508e-09	1.79568e-09	-3.97404e-09	-8.78038e-09	3.70423e-08	1.50432e-08	-4.75049e-10	-6.84237e-09	-9.16438e-09	5.04754e-08	-1.2853e-08	3.87793e-08	1.83276e-09	4.55883e-10	-1.27859e-08
1401.31	8.25	6.38142e-09	3.62777e-09	1.95767e-09	-1.27509e-09	4.10112e-09	3.31639e-09	3.06423e-09	-1.67301e-10	4.24282e-09	2.61523e-09	-1.58025e-09	-1.09374e-10	-7.46634e-09	2.11424e-09	-4.14866e-09	1.03339e-08	-1.18938e-08
1409.73	8.25	0	3.22479e-09	1.10957e-09	1.49089e-09	-4.00632e-09	-3.22317e-10	7.17181e-09	-5.19592e-09	-3.68794e-25	-8.44584e-09	-6.18614e-09	7.12085e-10	0	9.48996e-10	-2.38691e-09	-5.72241e-09	5.96229e-09
1418.15	8.25	7.58274e-24	-2.46203e-09	2.43486e-08	4.19336e-09	6.5327e-09	-1.1817e-09	2.31329e-09	7.60278e-10	-4.37793e-09	-2.00746e-08	3.34705e-08	-5.65792e-10	1.64466e-08	1.68492e-09	-3.08886e-09	-6.04481e-09	4.43443e-10
1426.56	8.25	2.28933e-06	1.4348e-06	1.41244e-06	1.38042e-06	1.36474e-06	1.3551e-06	1.34834e-06	1.30932e-06	1.2858e-06	1.28504e-06	1.26247e-06	1.16894e-06	1.09813e-06	1.01737e-06	9.72759e-07	8.33624e-07	7.43239e-07
1434.98	8.25	0.000341009	0.000314166	0.000312694	0.000311252	0.000309752	0.000308294	0.000306773	0.000303766	0.000300767	0.000297697	0.000291485	0.00028519	0.000278125	0.000266959	0.000246749	0.000224577	0.000202317
1443.4	8.25	0.000141226	0.000120681	0.000120149	0.000119684	0.000119197	0.000118693	0.000118161	0.000117194	0.000116284	0.000115287	0.0001136	0.000112013	0.000109695	0.000106343	0.000101056	9.47728e-05	8.96187e-05
1451.81	8.25	1.19571e-05	1.09709e-05	1.09427e-05	1.09627e-05	1.09491e-05	1.08747e-05	1.08749e-05	1.08639e-05	1.0856e-05	1.08273e-05	1.08223e-05	1.0952e-05	1.09763e-05	1.09404e-05	1.11352e-05	1.16209e-05	1.22116e-05
1460.23	8.25	5.08652e-07	3.91864e-07	4.33936e-07	4.40494e-07	4.1102e-07	4.08137e-07	4.13468e-07	4.09288e-07	4.09447e-07	3.97801e-07	3.98125e-07	4.03494e-07	3.9299e-07	3.9924e-07	2.96104e-07	4.72626e-07	3.91946e-07
1468.65	8.25	4.06488e-06	3.9825e-06	3.98751e-06	4.01507e-06	3.998e-06	4.00623e-06	4.02261e-06	4.00821e-06	4.03188e-06	4.06211e-06	4.08113e-06	4.09017e-06	4.12441e-06	4.11507e-06	4.22308e-06	4.28362e-06	4.42172e-06
1477.06	8.25	1.01139e-05	1.06185e-05	1.05752e-05	1.05828e-05	1.05707e-05	1.05917e-05	1.05729e-05	1.05877e-05	1.06483e-05	1.06786e-05	1.07131e-05	1.08244e-05	1.09581e-05	1.13997e-05	1.22782e-05	1.28154e-05	1.38999e-05
1485.48	8.25	1.90157e-06	1.9479e-06	1.95668e-06	1.9706e-06	1.96911e-06	1.96157e-06	1.97971e-06	1.98324e-06	1.99621e-06	1.99122e-06	2.03271e-06	2.08188e-06	2.08234e-06	2.01803e-06	2.12134e-06	2.36398e-06	2.399e-06
1493.9	8.25	3.16918e-06	2.73107e-06	2.7202e-06	2.71247e-06	2.62514e-06	2.53488e-06	2.52735e-06	2.51265e-06	2.26681e-06	2.19864e-06	2.00055e-06	1.81445e-06	1.68741e-06	1.48437e-06	1.35391e-06	6.26531e-07	-4.1316e-08
1502.31	8.25	6.05333e-07	6.44329e-07	6.25525e-07	6.46349e-07	6.37391e-07	6.60491e-07	6.73213e-07	6.49774e-07	6.21262e-07	6.76255e-07	6.41832e-07	6.83912e-07	6.29386e-07	7.09538e-07	7.37455e-07	7.34e-07	8.28084e-07
1510.73	8.25	2.49444e-09	1.14915e-08	6.16468e-09	1.88119e-08	7.69084e-09	2.89439e-08	2.63337e-09	-6.43414e-09	1.10494e-08	2.32194e-08	1.9958e-08	3.33424e-08	3.56136e-08	1.57243e-08	1.74337e-08	4.58944e-08	4.21691e-08
1519.15	8.25	1.28511e-07	9.57342e-08	1.12496e-07	7.90445e-08	9.91986e-08	8.53898e-08	8.22699e-08	7.84032e-08	8.71973e-08	1.04651e-07	1.20076e-07	1.14558e-07	6.04986e-08	8.52027e-08	1.32084e-07	1.065e-07	1.07266e-07
1527.56	8.25	6.4677e-06	5.76261e-06	5.65544e-06	5.58479e-06	5.60186e-06	5.45675e-06	5.28894e-06	5.18689e-06	4.84623e-06	4.58171e-06	4.48499e-06	4.37878e-06	4.00249e-06	4.14327e-06	3.92948e-06	2.55148e-07	4.49611e-08
1535.98	8.25	3.86791e-05	3.70321e-05	3.6856e-05	3.668e-05	3.65093e-05	3.63665e-05	3.62269e-05	3.59799e-05	3.58077e-05	3.56913e-05	3.56513e-05	3.5976e-05	3.47389e-05	3.33737e-05	3.26469e-05	2.68589e-05	2.94184e-05
1544.4	8.25	1.71814e-05	1.61812e-05	1.61458e-05	1.60627e-05	1.59533e-05	1.59096e-05	1.58507e-05	1.57161e-05	1.5587e-05	1.5553e-05	1.53693e-05	1.53306e-05	1.4848e-05	1.42871e-05	1.48727e-05	1.18512e-05	1.19522e-05
1552.81	8.25	1.71828e-07	2.51529e-07	2.5428e-07	2.27438e-07	2.579e-07	2.54466e-07	2.38801e-07	2.21427e-07	2.42412e-07	2.34258e-07	2.39404e-07	2.60032e-07	2.23977e-07	1.68251e-07	2.45033e-07	1.45236e-07	3.33454e-07
1561.23	8.25	2.93094e-07	3.61438e-07	3.79459e-07	3.66546e-07	3.69311e-07	3.50566e-07	3.46021e-07	3.64353e-07	3.46116e-07	3.24458e-07	3.59029e-07	3.32041e-07	3.28188e-07	2.9606e-07	3.40659e-07	1.73311e-07	5.65054e-07
1569.65	8.25	0.00015729	0.000175819	0.000174808	0.000174024	0.000173189	0.000172125	0.000171426	0.000169706	0.000168531	0.000167322	0.000165583	0.000164003	0.000159315	0.000152808	0.000144337	0.00012702	0.000123577
1578.06	8.25	0.000174613	0.000201063	0.000200019	0.00019907	0.000198142	0.000197187	0.000196246	0.000194513	0.000193022	0.000191826	0.000189688	0.000188488	0.000184111	0.000178165	0.000171314	0.000149738	0.000141043
1586.48	8.25	2.2992e-05	2.23071e-05	2.21364e-05	2.1939e-05	2.17969e-05	2.17236e-05	2.15882e-05	2.13531e-05	2.1197e-05	2.10555e-05	2.07356e-05	2.03952e-05	1.95557e-05	1.84932e-05	1.81817e-05	1.38608e-05	1.45279e-05
1594.9	8.25	1.02038e-05	9.17478e-06	9.1142e-06	9.18112e-06	9.1589e-06	9.09351e-06	9.06428e-06	9.12336e-06	9.14765e-06	9.17417e-06	9.39601e-06	9.84381e-06	9.41222e-06	8.81731e-06	7.57911e-06	4.16907e-06	4.92155e-06
1603.31	8.25	0.000204129	0.000244054	0.000242884	0.000241646	0.000240586	0.000239405	0.000238477	0.00023637	0.000234592	0.0002331	0.000230255	0.000228403	0.000222318	0.000212951	0.000201307	0.000171966	0.000160294
1611.73	8.25	0.000143168	0.000166131	0.000165253	0.000164338	0.000163371	0.000162881	0.00016187	0.000160595	0.000159191	0.000158425	0.000156238	0.000154851	0.000150502	0.000144108	0.000137694	0.000116251	0.000111867
1620.15	8.25	1.48824e-05	1.26773e-05	1.24582e-05	1.24661e-05	1.231e-05	1.22389e-05	1.20082e-05	1.18242e-05	1.14926e-05	1.1446e-05	1.08884e-05	1.05904e-05	9.94415e-06	9.57535e-06	9.96248e-06	9.06522e-06	1.00193e-05
1628.56	8.25	4.03909e-06	3.77314e-06	3.81732e-06	3.58701e-06	3.4e-06	3.42851e-06	3.07526e-06	3.06291e-06	2.58565e-06	2.4576e-06	2.54413e-06	2.58139e-06	2.59564e-06	2.15042e-06	1.10027e-06	-1.90607e-06	-2.55374e-06
1636.98	8.25	1.16075e-05	1.09337e-05	1.09373e-05	1.07608e-05	1.07461e-05	1.06592e-05	1.05502e-05	1.04329e-05	1.04383e-05	1.03902e-05	1.03452e-05	1.04662e-05	1.00631e-05	9.48159e-06	8.44799e-06	5.25012e-06	6.35576e-06
1645.4	8.25	3.34527e-05	3.23844e-05	3.22415e-05	3.20921e-05	3.19913e-05	3.18605e-05	3.17694e-05	3.16433e-05	3.15572e-05	3.15721e-05	3.17275e-05	3.232e-05	3.11495e-05	2.97399e-05	2.90789e-05	2.44865e-05	2.97606e-05
1653.81	8.25	1.5218e-05	1.43186e-05	1.42159e-05	1.41359e-05	1.4057e-05	1.39951e-05	1.40279e-05	1.39305e-05	1.38708e-05	1.381e-05	1.39434e-05	1.4237e-05	1.38659e-05	1.32944e-05	1.41286e-05	1.23299e-05	1.60103e-05
1662.23	8.25	2.61624e-06	2.46169e-06	2.33817e-06	2.3196e-06	2.17428e-06	2.15474e-06	2.2204e-06	1.9455e-06	1.98852e-06	2.00388e-06	2.05254e-06	2.13002e-06	1.96802e-06	1.45161e-06	7.71793e-07	-5.05157e-07	-6.61704e-07
1670.65	8.25	1.11454e-06	1.00766e-06	1.02571e-06	1.00115e-06	1.00143e-06	9.89775e-07	9.72621e-07	9.93285e-07	9.95739e-07	9.43598e-07	9.49953e-07	9.83939e-07	9.33049e-07	9.54587e-07	9.29642e-07	6.97689e-07	9.60719e-07
1679.06	8.25	2.77687e-07	2.42624e-07	2.28595e-07	2.43225e-07	2.30578e-07	2.28875e-07	2.6614e-07	2.24853e-07	2.08382e-07	2.29816e-07	2.51853e-07	2.39825e-07	2.49862e-07	2.5923e-07	2.48559e-07	1.44771e-07	1.87854e-07
1687.48	8.25	1.04305e-07	8.78926e-08	7.16465e-08	6.94683e-08	1.00724e-07	8.14218e-08	8.77689e-08	8.77958e-08	8.71557e-08	1.04991e-07	8.56572e-08	9.4572e-08	3.3899e-08	1.15146e-07	1.03105e-07	7.28724e-08	1.01372e-07
1695.9	8.25	1.01777e-08	9.17934e-10	7.86373e-09	8.57361e-09	1.31988e-09	2.71187e-09	3.05199e-08	2.83768e-08	3.50544e-08	2.19541e-08	6.57482e-08	2.07426e-09	1.92678e-08	1.33222e-08	-1.03668e-08	1.04801e-08	1.05195e-08
1704.31	8.25	1.33509e-08	1.4086e-08	1.6357e-08	1.51774e-08	5.63592e-09	5.31212e-08	2.02426e-08	1.81041e-08	5.73741e-09	1.29035e-08	2.15648e-08	2.12141e-08	3.23661e-08	2.7217e-08	1.96872e-08	6.40415e-09	1.58148e-08
1712.73	8.25	2.03694e-08	1.5126e-08	2.08264e-08	2.49073e-08	1.08581e-24	1.94788e-08	1.45215e-08	4.61545e-08	2.95476e-08	8.19929e-09	1.30304e-08	3.37043e-08	4.56598e-08	2.11786e-08	1.21793e-08	8.65029e-09	6.17068e-09
1721.15	8.25	1.55783e-08	3.60323e-08	5.16159e-09	2.09696e-08	1.60467e-08	1.31519e-08	0	0	2.68783e-08	2.03825e-08	9.28202e-09	1.10507e-08	9.35559e-09	1.47257e-08	2.48635e-08	1.17701e-08	-1.65255e-08
1729.56	8.25	0	-9.46401e-25	0	0	8.36373e-09	1.35965e-08	0	0	0	1.70815e-08	0	0	8.65293e-09	-1.4978e-09	-4.73501e-09	6.1508e-09	1.38282e-08
1737.98	8.25	0	0	0	5.77228e-09	9.62931e-09	0	0	0	0	-1.47485e-08	0	8.86355e-09	0	0	0	8.35682e-10	8.25021e-09
1746.4	8.25	0	0	4.82033e-09	0	-4.72775e-09	0	0	-1.98034e-08	0	0	3.23061e-09	0	0	0	0	-1.89453e-08	-1.24408e-09
1754.81	8.25	2.69168e-07	2.90312e-07	2.69084e-07	2.32138e-07	2.55399e-07	2.42434e-07	2.61734e-07	2.52805e-07	2.7173e-07	2.2999e-07	3.40438e-07	2.87322e-07	2.04806e-07	2.83845e-07	2.24077e-07	2.72883e-07	3.79291e-07
1763.23	8.25	2.20157e-07	1.87776e-07	1.77521e-07	1.75204e-07	1.81058e-07	2.18932e-07	1.98939e-07	1.68741e-07	1.65166e-07	1.85323e-07	1.43997e-07	1.52341e-07	2.04887e-07	1.78429e-07	2.15694e-07	1.74131e-07	1.98973e-07
1771.65	8.25	4.6711e-08	6.70614e-08	6.42636e-08	1.69349e-08	6.98289e-08	3.32256e-08	2.01751e-08	2.84259e-08	5.8308e-09	6.36648e-09	5.35076e-08	5.08322e-08	5.90698e-09	5.53942e-08	5.77511e-09	4.33083e-08	3.11352e-08
1780.06	8.25	0	1.43425e-08	1.37669e-08	-5.97618e-09	0	2.59607e-08	1.61706e-08	3.19778e-08	1.17622e-08	3.84766e-08	-2.32068e-24	0	1.23177e-08	0	1.65412e-10	-1.3045e-09	9.29425e-09
1788.48	8.25	2.60377e-07	3.05412e-07	2.7972e-07	2.68287e-07	2.25864e-07	2.76906e-07	3.09921e-07	2.68175e-07	1.93029e-07	2.31648e-07	2.84257e-07	2.16532e-07	2.14487e-07	1.88529e-07	2.27714e-07	3.1843e-07	3.77953e-07
1796.9	8.25	9.01429e-08	1.36454e-07	1.51335e-07	1.67051e-07	9.51053e-08	1.40843e-07	1.0337e-07	1.73182e-07	1.44664e-07	1.16268e-07	1.06462e-07	1.33637e-07	1.49742e-07	1.8833e-07	1.87032e-07	2.20235e-07	2.66187e-07
1805.31	8.25	6.76717e-08	5.07853e-08	5.47712e-08	3.50222e-08	5.69561e-08	1.85533e-08	1.42476e-09	1.37874e-08	2.01714e-08	1.20229e-08	9.89079e-09	5.26562e-08	1.41315e-08	3.28664e-08	4.79436e-08	2.47002e-08	4.66262e-08
1813.73	8.25	5.72359e-11	2.10313e-09	-4.08098e-09	1.14772e-08	1.13185e-08	7.6075e-10	1.21714e-08	1.40691e-08	-5.37387e-09	-2.00236e-09	8.85446e-09	7.13727e-09	1.23981e-08	1.6717e-08	2.07297e-08	8.54857e-09	2.21992e-08
1822.15	8.25	-3.89852e-09	-4.4324e-08	-3.67386e-08	-1.16654e-09	-1.91065e-08	-3.78935e-08	6.8752e-09	-4.30421e-08	-5.16313e-08	-3.98653e-08	-3.69949e-08	-4.84459e-08	-5.80153e-08	-6.55328e-08	-8.11898e-08	-9.23966e-08	-7.66891e-08
1830.56	8.25	5.20908e-08	1.31431e-07	1.41218e-07	1.26573e-07	1.32146e-07	1.08381e-07	1.27343e-07	1.33305e-07	1.23175e-07	1.34735e-07	1.30984e-07	1.07297e-07	1.31367e-07	1.46546e-07	1.24135e-07	1.07565e-07	1.38252e-07
1838.98	8.25	-1.74292e-08	-1.84712e-08	-1.97839e-08	-1.84739e-08	-7.55599e-08	-1.84774e-08	-1.84794e-08	-1.84842e-08	-1.84902e-08	-2.17865e-08	-7.57342e-08	-1.85492e-08	-1.52903e-08	-1.53842e-08	-1.5692e-08	-1.63327e-08	-1.7007e-08
1847.4	8.25	-1.90507e-08	-4.86846e-08	-4.87712e-08	-4.88621e-08	-4.89582e-08	-5.19058e-08	-5.20179e-08	-5.10308e-08	-5.12907e-08	-5.15764e-08	-5.22361e-08	-5.30303e-08	-5.22661e-08	-8.97587e-08	-5.84545e-08	-6.50828e-08	-7.1322e-08
1855.82	8.25	-5.77625e-08	-8.86717e-08	-9.00501e-08	-9.01132e-08	-9.01814e-08	-6.7733e-08	-9.03326e-08	-9.05054e-08	-9.07029e-08	-9.09282e-08	-9.14785e-08	-9.2187e-08	-9.31195e-08	-9.50304e-08	-1.00127e-07	-1.08691e-07	-1.17024e-07
1864.23	8.25	1.2276e-07	1.29573e-07	1.33217e-07	1.37957e-07	1.15979e-07	1.48513e-07	1.28921e-07	1.8712e-07	1.59577e-07	1.73532e-07	1.52434e-07	1.37919e-07	1.29736e-07	1.7114e-07	1.61972e-07	1.85265e-07	1.93506e-07
1872.65	8.25	1.94917e-05	1.94094e-05	1.94289e-05	1.94421e-05	1.94616e-05	1.94925e-05	1.95199e-05	1.94246e-05	1.94975e-05	1.95287e-05	1.95351e-05	1.95982e-05	1.95611e-05	1.95913e-05	1.95194e-05	1.98208e-05	2.01103e-05
1881.07	8.25	6.29271e-05	4.63276e-05	4.61852e-05	4.61496e-05	4.60552e-05	4.588e-05	4.5775e-05	4.55672e-05	4.53955e-05	4.50814e-05	4.46139e-05	4.41023e-05	4.35955e-05	4.26889e-05	4.09195e-05	3.90524e-05	3.75176e-05
1889.48	8.25	1.6259e-05	1.59778e-05	1.60012e-05	1.59801e-05	1.59542e-05	1.59807e-05	1.59614e-05	1.60061e-05	1.60273e-05	1.60209e-05	1.60096e-05	1.6061e-05	1.61983e-05	1.63666e-05	1.68675e-05	1.79176e-05	1.89295e-05
1897.9	8.25	3.9601e-06	5.7558e-06	5.85335e-06	5.84465e-06	5.85176e-06	5.86648e-06	5.86736e-06	5.92377e-06	5.9178e-06	6.00273e-06	6.09213e-06	6.15585e-06	6.35066e-06	6.54002e-06	7.01806e-06	7.90099e-06	8.67263e-06
1906.32	8.25	2.37001e-06	4.82388e-06	4.74752e-06	4.86424e-06	4.84286e-06	4.92756e-06	4.90339e-06	4.88991e-06	4.86804e-06	4.89945e-06	5.0133e-06	5.01522e-06	5.14326e-06	5.32207e-06	5.82501e-06	6.33529e-06	6.99607e-06
1914.73	8.25	5.67137e-07	8.45937e-07	8.64172e-07	8.28041e-07	8.84328e-07	8.03e-07	9.08574e-07	8.59829e-07	8.29527e-07	8.30335e-07	8.73192e-07	9.43758e-07	9.20434e-07	9.54389e-07	9.33015e-07	1.26592e-06	1.18408e-06
1923.15	8.25	5.55685e-07	6.3983e-07	6.14755e-07	6.57538e-07	6.03188e-07	6.56428e-07	6.67183e-07	6.58088e-07	6.26023e-07	6.43716e-07	6.40163e-07	7.0878e-07	6.97988e-07	6.94913e-07	7.64942e-07	8.45939e-07	9.53479e-07
1931.57	8.25	2.81204e-06	2.39612e-06	2.13998e-06	2.22237e-06	2.18414e-06	2.14998e-06	2.1655e-06	2.13706e-06	2.15841e-06	2.1971e-06	2.17332e-06	2.19822e-06	2.22012e-06	2.28354e-06	2.42159e-06	2.47764e-06	2.79239e-06
1939.98	8.25	0.000133018	9.09199e-05	9.02389e-05	8.93344e-05	8.87398e-05	8.79132e-05	8.7255e-05	8.58304e-05	8.43796e-05	8.29973e-05	8.0109e-05	7.75463e-05	7.46937e-05	7.07595e-05	6.51534e-05	6.04697e-05	5.71733e-05
1948.4	8.25	0.000733857	0.000640472	0.000636793	0.000633058	0.000629366	0.000625529	0.000621803	0.000614134	0.000606453	0.000598719	0.000583077	0.000567297	0.00055042	0.000523537	0.00047299	0.000421108	0.000364557
1956.82	8.25	0.00155931	0.00127421	0.00126839	0.00126246	0.00125649	0.00125048	0.00124441	0.0012321	0.00121961	0.0012069	0.00118068	0.00115372	0.00112386	0.00107538	0.00098079	0.000880098	0.000780573
1965.23	8.25	0.00115836	0.00103478	0.00103017	0.00102528	0.00102061	0.00101603	0.00101136	0.00100195	0.000992801	0.000983578	0.000964995	0.00094603	0.000925441	0.000893518	0.000834123	0.000773887	0.00070729
1973.65	8.25	0.000381047	0.000389112	0.000387191	0.000385355	0.000383475	0.000381605	0.000379531	0.000375881	0.000372128	0.000368278	0.000360665	0.000352943	0.000343611	0.000328459	0.000298237	0.000264089	0.00022758
1982.07	8.25	6.36019e-05	5.86665e-05	5.82636e-05	5.78963e-05	5.795e-05	5.73443e-05	5.7322e-05	5.64848e-05	5.6327e-05	5.61726e-05	5.54684e-05	5.56561e-05	5.47078e-05	5.29121e-05	5.20205e-05	4.37776e-05	4.62879e-05
1990.48	8.25	4.87285e-05	4.73451e-05	4.73799e-05	4.70913e-05	4.71577e-05	4.71012e-05	4.71494e-05	4.73499e-05	4.7597e-05	4.79989e-05	4.9246e-05	5.08965e-05	4.99753e-05	4.935e-05	5.08201e-05	4.89244e-05	5.90563e-05
1998.9	8.25	0.00109059	0.00100372	0.0010006	0.000997502	0.000994468	0.00099132	0.000988038	0.000981735	0.000975211	0.000968559	0.00095499	0.000940708	0.000925482	0.000900508	0.000846323	0.000790749	0.00072617
2007.32	8.25	0.00286276	0.00243229	0.00242071	0.00240881	0.00239662	0.00238461	0.00237226	0.00234695	0.00232095	0.00229404	0.00223752	0.00217643	0.00211901	0.00202274	0.00182118	0.00162715	0.0014158
2015.73	8.25	0.00278608	0.0022609	0.00224881	0.00223664	0.00222434	0.00221203	0.00219958	0.0021745	0.00214894	0.0021229	0.00206919	0.00201264	0.00195786	0.00186869	0.00168949	0.00152221	0.00133538
2024.15	8.25	0.000843804	0.000804487	0.000800795	0.00079704	0.000793261	0.000789525	0.000785741	0.000778026	0.000770562	0.000762853	0.000747227	0.000730911	0.00071518	0.00068959	0.000638328	0.000585175	0.000523642
2032.57	8.25	0.000307905	0.000294233	0.000292274	0.000290544	0.000288881	0.000287311	0.000285747	0.000282877	0.000280276	0.000277923	0.000274285	0.000271985	0.00026369	0.000253574	0.000241095	0.000204668	0.000212531
2040.98	8.25	0.000304904	0.000318594	0.000317643	0.000315836	0.000314973	0.000313449	0.000312456	0.000309948	0.00030833	0.000306528	0.000304569	0.000305509	0.000300062	0.000291736	0.000281017	0.000241057	0.000238218
2049.4	8.25	0.00073542	0.000773256	0.000769876	0.000765976	0.000762653	0.000759185	0.000755588	0.000747861	0.000739787	0.000731533	0.00071481	0.000696298	0.000680784	0.000654716	0.000598306	0.000541954	0.000479078
2057.82	8.25	0.000878303	0.00085827	0.000854643	0.000850845	0.000847176	0.000843801	0.000839975	0.000832477	0.000825504	0.000817477	0.00080261	0.000786413	0.000771134	0.000746125	0.000695727	0.000647594	0.000595065
2066.23	8.25	0.000920398	0.000876393	0.000872237	0.000868184	0.000863855	0.000859705	0.000855791	0.000847306	0.00083886	0.000830278	0.000812375	0.000793712	0.000777981	0.000752471	0.000702877	0.000657137	0.000608231
2074.65	8.25	0.000595611	0.000624744	0.000621798	0.000618788	0.000615737	0.000613136	0.000610175	0.000604274	0.000598438	0.000592852	0.00058115	0.000569607	0.000556827	0.00053702	0.00049643	0.000441265	0.00038987
2083.07	8.25	0.000313679	0.00030825	0.000306383	0.000304576	0.000302784	0.00030115	0.0002996	0.000296886	0.000294427	0.000292141	0.000288874	0.000288057	0.000279564	0.000267279	0.000254036	0.000211919	0.000216842
2091.48	8.25	0.000189185	0.000180897	0.000179753	0.000178483	0.000177223	0.000176146	0.000175101	0.000172936	0.000171394	0.000169653	0.000167693	0.000167201	0.000161086	0.000153398	0.000148925	0.000113213	0.000127319
2099.9	8.25	6.59769e-05	6.30615e-05	6.25653e-05	6.2435e-05	6.20814e-05	6.17245e-05	6.13847e-05	6.10239e-05	6.15076e-05	6.17606e-05	6.31328e-05	6.44459e-05	6.24124e-05	6.06851e-05	5.89221e-05	3.68457e-05	6.0251e-05
2108.32	8.25	2.67014e-05	2.45132e-05	2.44854e-05	2.4299e-05	2.4282e-05	2.4196e-05	2.41152e-05	2.41997e-05	2.45206e-05	2.42936e-05	2.52564e-05	2.61882e-05	2.608e-05	2.55661e-05	1.83748e-05	9.6046e-06	3.2162e-05
2116.73	8.25	1.80666e-05	1.51685e-05	1.51226e-05	1.42865e-05	1.4516e-05	1.35189e-05	1.33335e-05	1.33352e-05	1.26664e-05	1.15758e-05	1.07607e-05	1.06786e-05	8.97712e-06	6.37992e-06	2.70091e-06	-9.17755e-06	-1.54706e-05
2125.15	8.25	3.27211e-06	3.09197e-06	2.96372e-06	2.9374e-06	2.9457e-06	2.79662e-06	2.7791e-06	2.55699e-06	2.40575e-06	2.39667e-06	2.30348e-06	2.39827e-06	2.02206e-06	1.74202e-06	2.14592e-06	3.75715e-07	1.66321e-06
2133.57	8.25	1.89481e-06	1.60457e-06	1.60019e-06	1.52375e-06	1.44726e-06	1.32906e-06	1.32612e-06	1.24561e-06	1.16506e-06	1.24302e-06	1.29515e-06	1.10569e-06	8.95773e-07	6.36563e-07	3.72197e-07	-2.02317e-06	-1.59666e-06
2141.98	8.25	2.3958e-06	2.14444e-06	2.08201e-06	2.01505e-06	1.91553e-06	1.92465e-06	1.84443e-06	1.54972e-06	1.11798e-06	1.02795e-06	3.21041e-07	1.3622e-07	-4.17291e-07	-3.91875e-07	-2.19796e-07	-6.35261e-06	-9.98767e-06
2150.4	8.25	1.9946e-05	1.77085e-05	1.74429e-05	1.73066e-05	1.69379e-05	1.68159e-05	1.65864e-05	1.60495e-05	1.55789e-05	1.52489e-05	1.43702e-05	1.38493e-05	1.46663e-05	1.69446e-05	2.62575e-05	2.3941e-05	3.70307e-05
2158.82	8.25	1.17457e-05	1.04247e-05	9.88639e-06	9.66704e-06	9.82128e-06	9.65709e-06	8.89934e-06	8.65427e-06	8.25079e-06	7.95484e-06	7.42036e-06	6.96304e-06	5.91155e-06	4.45226e-06	2.17819e-06	1.82039e-06	1.26026e-05
2167.23	8.25	9.35564e-06	9.18867e-06	9.10163e-06	9.08663e-06	8.56103e-06	8.51276e-06	8.37772e-06	8.22008e-06	7.97652e-06	7.9181e-06	7.52486e-06	7.86206e-06	7.14836e-06	6.03282e-06	4.0011e-06	-3.15701e-07	4.45113e-06
2175.65	8.25	2.65337e-06	1.87449e-06	1.79007e-06	2.06978e-06	2.00979e-06	1.9427e-06	1.88912e-06	1.92838e-06	1.94048e-06	1.94826e-06	1.4429e-06	1.31573e-06	7.74478e-07	-9.461e-07	-3.27296e-06	-7.00545e-06	-1.10605e-05
2184.07	8.25	6.46091e-07	5.47613e-07	5.47854e-07	6.30536e-07	5.45944e-07	5.43402e-07	5.10053e-07	6.25442e-07	5.20888e-07	4.59332e-07	6.13762e-07	4.16035e-07	5.85956e-07	5.93163e-07	6.35356e-07	3.82777e-07	7.78777e-07
2192.48	8.25	7.78087e-07	7.28443e-07	7.10656e-07	6.70858e-07	6.94378e-07	7.58991e-07	7.25636e-07	7.1688e-07	7.31248e-07	6.82891e-07	5.75301e-07	6.35135e-07	7.09361e-07	6.90302e-07	8.10741e-07	3.98724e-07	1.06743e-06
2200.9	8.25	1.0713e-07	2.41225e-07	7.49968e-08	9.31961e-08	8.93967e-08	4.38476e-08	8.05441e-08	8.89064e-24	1.55045e-07	1.41039e-07	5.69055e-08	5.49748e-08	8.56261e-08	9.40175e-08	6.71875e-08	3.79026e-08	8.71868e-08
2209.32	8.25	2.71252e-07	9.05139e-08	3.55806e-07	1.66654e-07	2.21681e-07	2.67018e-07	2.94971e-07	1.37275e-07	3.24047e-07	3.33704e-07	2.54965e-07	2.64204e-07	2.46457e-07	2.52853e-07	2.5816e-07	1.20068e-07	4.13353e-07
2217.73	8.25	1.5877e-07	1.13949e-07	1.58163e-07	1.37155e-07	2.303e-07	1.71056e-07	1.61172e-07	2.21863e-07	1.34071e-07	1.38214e-07	2.13474e-07	1.57407e-07	1.57337e-07	1.45243e-07	1.20782e-07	8.7175e-08	3.64365e-08
2226.15	8.25	2.16332e-07	3.31292e-07	3.3604e-07	1.54649e-07	1.69871e-07	1.4056e-07	1.52241e-07	1.97517e-07	1.1356e-07	2.10553e-07	3.9324e-07	1.45748e-07	1.6178e-07	1.4843e-07	1.92444e-07	1.22805e-08	2.598e-07
2234.57	8.25	3.41211e-08	4.8388e-08	4.02769e-08	3.21089e-08	8.06975e-08	0	4.39561e-08	0	3.23902e-08	4.05814e-08	0	4.53674e-08	5.74955e-08	8.50338e-08	4.88282e-08	6.13129e-08	2.07242e-08
2242.98	8.25	4.0945e-08	0	5.61726e-08	3.68985e-08	4.88596e-08	5.14818e-24	8.46612e-08	4.85855e-08	5.66728e-08	-1.79847e-08	3.57789e-08	3.18237e-08	2.91524e-08	2.8702e-08	1.71885e-08	1.64071e-08	3.71482e-08
2251.4	8.25	1.98434e-07	0	7.32525e-08	1.67747e-07	2.64783e-07	1.79629e-07	2.35665e-07	3.13673e-07	2.06748e-07	1.46676e-07	5.42212e-08	1.6216e-07	1.40551e-07	1.80564e-07	1.63281e-07	8.5728e-08	7.49425e-08
2259.82	8.25	1.47043e-07	2.11402e-07	1.9052e-07	1.17141e-07	1.26216e-07	1.38314e-07	5.65635e-08	1.83615e-07	7.12119e-08	5.34258e-08	1.83134e-07	1.19288e-07	1.09963e-07	1.03173e-07	1.40779e-07	1.10047e-07	9.96367e-08
2268.23	8.25	7.85306e-08	8.64875e-08	9.04398e-08	2.63282e-08	1.51715e-23	1.59571e-08	1.28846e-07	1.18137e-08	9.5645e-08	3.70012e-08	2.27126e-08	3.12805e-08	3.46837e-08	3.27851e-08	1.6461e-08	2.92888e-08	-1.0649e-08
2276.65	8.25	9.39325e-08	1.46782e-07	2.8988e-08	5.91653e-08	2.22172e-07	8.52757e-08	4.0201e-08	0	1.08203e-07	1.39857e-08	3.17229e-08	6.05717e-08	6.3357e-08	1.0265e-07	1.22494e-07	8.28772e-08	5.52613e-08
2285.07	8.25	2.22959e-08	-7.84569e-09	0	0	0	5.97294e-08	9.09127e-09	5.72636e-09	6.48435e-08	-3.28941e-08	1.28961e-08	3.11924e-08	2.30427e-08	4.27924e-09	1.05485e-08	9.83481e-09	-8.00383e-08
2293.48	8.25	1.55473e-08	0	0	0	0	0	0	0	6.35773e-09	3.86404e-24	1.91041e-08	1.6846e-08	1.24733e-08	1.77803e-08	1.7497e-08	-2.64859e-08	8.52494e-08
2301.9	8.25	3.77631e-24	-8.3198e-09	0	0	0	0	0	-2.11554e-24	3.08381e-09	-6.05737e-08	1.15578e-09	-3.65438e-09	6.65251e-09	2.52142e-08	2.48894e-08	-1.43574e-08	0
2310.32	8.25	8.69845e-09	0	-1.57042e-08	8.33387e-08	3.79774e-08	4.57805e-08	2.08064e-08	-2.72986e-08	7.58967e-08	0	-8.92432e-09	2.42068e-08	-5.67973e-09	2.26055e-09	-1.43235e-08	-9.2828e-09	2.99439e-08
2318.73	8.25	0	0	0	0	0	0	0	1.84505e-08	1.41693e-08	9.81035e-09	4.69136e-09	4.24105e-09	-8.11675e-09	0	3.17488e-09	3.19702e-08	5.08812e-08
2327.15	8.25	0	0	0	0	0	0	0	0	0	0	4.43613e-09	0	0	-6.47716e-09	-2.54424e-25	0	0
2335.57	8.25	0	-1.19859e-23	0	0	0	-5.65496e-08	0	0	-2.52539e-09	0	-6.88318e-09	2.06224e-08	3.59564e-09	0	-2.19811e-08	-4.70223e-08	1.01933e-07
2343.98	8.25	0	0	0	0	-3.53789e-09	0	0	0	7.44572e-09	2.12673e-08	0	-1.71021e-09	6.08233e-09	0	-1.62076e-08	0	0
2352.4	8.25	0	0	-7.79537e-09	0	0	0	0	0	-4.05814e-09	6.51092e-09	1.63588e-08	0	2.23562e-08	2.81913e-09	0	0	-4.78818e-08
2360.82	8.25	0	-1.11975e-07	0	0	-1.29676e-09	0	0	-1.02945e-07	0	0	-3.24704e-24	1.6263e-08	-7.9183e-09	4.53566e-09	0	-2.62848e-08	1.73501e-08
2369.23	8.25	0	5.08178e-24	0	0	2.15788e-09	1.36333e-08	0	7.93513e-09	0	8.85549e-09	1.40155e-08	1.24298e-08	9.96593e-09	7.77668e-09	9.0974e-25	1.38123e-09	-2.90973e-09
2377.65	8.25	0	5.39744e-08	0	-7.33956e-09	-5.51436e-09	0	0	-2.82988e-09	-9.33714e-09	0	-2.72861e-09	0	0	-2.4953e-09	0	-3.8393e-08	-1.00635e-09
2386.07	8.25	0	-5.68092e-09	0	1.7485e-24	4.51184e-09	0	0	3.79229e-09	9.38408e-09	5.98042e-09	3.22561e-09	1.37525e-08	3.36424e-24	2.08299e-09	-2.31206e-08	0	-9.89085e-09
2394.48	8.25	0	0	2.96175e-08	0	0	0	9.06689e-09	-3.83014e-09	-2.01159e-09	9.63245e-10	1.09473e-09	1.08091e-08	2.78984e-08	1.41009e-08	2.5617e-09	5.2629e-08	7.75403e-08
2402.9	8.25	2.08068e-08	5.43082e-09	0	5.17143e-09	0	0	0	0	2.52884e-09	6.53358e-10	-1.6384e-08	-5.6386e-09	5.10479e-09	3.65708e-24	-2.05616e-08	1.16111e-23	5.58772e-08
2411.32	8.25	0	0	0	2.95959e-09	2.54372e-09	0	1.23909e-24	5.34876e-08	0	5.57828e-09	1.26709e-08	8.00574e-09	1.49252e-08	0	2.46383e-08	0	1.71561e-08
2419.73	8.25	0	0	1.09271e-07	0	2.95374e-09	2.74964e-24	4.36685e-09	0	0	4.65107e-09	-1.26123e-08	-1.67667e-08	1.55062e-08	0	-3.22332e-08	3.64419e-09	1.04976e-08
2428.15	8.25	0	0	0	0	0	7.57951e-09	3.12369e-09	0	1.25015e-08	-1.20695e-09	0	5.81905e-09	3.28963e-08	3.02084e-09	2.44114e-08	-1.9502e-08	8.34576e-09
2436.57	8.25	0	0	0	6.01261e-09	6.33298e-09	0	0	0	8.80156e-09	7.78512e-09	0	5.42626e-09	-2.62532e-09	-2.05305e-24	0	-8.7724e-09	-1.3201e-08
2444.98	8.25	0	0	0	0	0	6.60893e-10	6.31839e-09	0	0	-1.32982e-24	-9.68783e-09	0	0	0	5.11245e-08	-5.73103e-25	-1.41935e-08
2453.4	8.25	0	1.06507e-08	0	4.59205e-09	6.01403e-09	1.67952e-07	0	0	4.13292e-09	0	2.4841e-08	1.87259e-09	4.79045e-08	1.73489e-08	6.07797e-08	3.35163e-08	3.63454e-09
2461.82	8.25	0	7.94337e-09	1.72333e-08	0	3.08834e-09	-2.12638e-09	1.24046e-08	6.19127e-08	1.21e-08	2.30489e-08	1.01258e-08	1.1093e-08	1.63712e-08	1.3166e-08	1.95732e-08	-1.2773e-08	4.51305e-08
2470.23	8.25	8.88538e-08	2.71554e-08	2.69405e-08	3.25808e-08	5.45226e-08	4.8967e-08	4.71862e-08	3.30076e-08	4.27901e-08	5.9596e-08	4.55806e-08	5.31267e-08	6.02762e-08	2.7629e-08	1.46857e-07	-2.65718e-08	6.85575e-08
2478.65	8.25	2.33227e-07	2.6173e-07	2.53755e-07	2.63765e-07	2.70439e-07	2.44637e-07	2.64592e-07	2.458e-07	2.34411e-07	2.55559e-07	2.46049e-07	2.22143e-07	2.37778e-07	2.31334e-07	2.84222e-07	2.63573e-07	3.38909e-07
2487.07	8.25	5.73571e-06	6.53382e-06	6.52478e-06	6.53931e-06	6.60764e-06	6.64338e-06	6.66341e-06	6.74908e-06	6.88371e-06	7.00196e-06	7.18591e-06	7.34545e-06	7.57842e-06	7.94259e-06	9.66609e-06	1.31787e-05	1.7986e-05
2495.48	8.25	1.70346e-06	1.7702e-06	1.73839e-06	1.76086e-06	1.78556e-06	1.756e-06	1.73038e-06	1.75584e-06	1.76945e-06	1.76499e-06	1.77338e-06	1.76506e-06	1.81556e-06	1.81425e-06	1.946e-06	2.29077e-06	2.58011e-06
2503.9	8.25	1.54023e-06	1.37396e-06	1.41422e-06	1.38237e-06	1.43328e-06	1.37869e-06	1.40566e-06	1.37133e-06	1.36734e-06	1.35424e-06	1.41689e-06	1.40194e-06	1.40442e-06	1.37976e-06	1.52894e-06	1.68083e-06	1.92388e-06
2512.32	8.25	1.48436e-06	1.28241e-06	1.26769e-06	1.34731e-06	1.20339e-06	1.29825e-06	1.23302e-06	1.27253e-06	1.2963e-06	1.15803e-06	1.24575e-06	1.14785e-06	1.27985e-06	1.34693e-06	1.30978e-06	1.41314e-06	1.5128e-06
2520.73	8.25	1.1245e-06	9.49632e-07	1.02058e-06	9.47611e-07	9.68657e-07	8.75012e-07	9.87483e-07	8.96345e-07	9.50747e-07	8.68961e-07	8.96428e-07	8.78218e-07	8.63291e-07	8.68562e-07	9.59161e-07	8.44283e-07	8.31364e-07

## Sheet: k_GF5
Wavelength	FWHM	k_Summer_L	k_Summer_M	k_Summer_H	k_Winter_L	k_Winter_M	k_Winter_H	k_1976_L	k_1976_M	k_1976_H
1004.77	7.67828	0	0	0	0	0	0	0	0	0	0	0	0	0	0	0	0	0
1013.2	7.68189	0	0	0	0	0	0	0	0	0	0	0	0	0	0	0	0	0
1021.62	7.68551	0	0	0	0	0	0	0	0	0	0	0	0	0	0	0	0	0
1030.05	7.68912	0	0	0	0	0	0	0	0	0	0	0	0	0	0	0	0	0
1038.48	7.69273	7.43976e-07	6.39973e-07	5.79309e-07	6.15896e-07	6.08323e-07	5.85381e-07	5.40182e-07	5.57745e-07	6.0425e-07	6.38575e-07	5.69839e-07	5.70145e-07	5.62236e-07	5.44848e-07	5.35249e-07	4.70463e-07	4.94852e-07
1046.91	7.69634	6.16487e-07	4.62338e-07	4.73165e-07	4.59824e-07	4.39892e-07	4.43895e-07	4.24181e-07	4.02351e-07	3.56247e-07	3.38321e-07	2.67626e-07	2.27472e-07	1.10117e-07	-8.11436e-08	-3.86534e-07	-6.87819e-07	-8.17754e-07
1055.33	7.69995	6.53556e-07	6.50885e-07	6.04209e-07	6.21919e-07	5.80725e-07	5.98647e-07	5.64802e-07	6.22936e-07	4.95439e-07	4.34699e-07	3.58149e-07	3.02013e-07	2.71079e-07	2.07308e-07	1.03689e-07	-7.37524e-08	-1.76917e-07
1063.76	7.70356	2.92716e-07	2.71764e-07	3.39291e-07	2.51207e-07	2.127e-07	3.30596e-07	2.78036e-07	2.03721e-07	2.28734e-07	2.79924e-07	2.52051e-07	2.56155e-07	2.34876e-07	2.35485e-07	2.31185e-07	2.09586e-07	1.99921e-07
1072.19	7.70718	3.16236e-08	4.7119e-08	6.07964e-08	1.38929e-08	3.65078e-08	5.00871e-08	0	9.65199e-08	1.68164e-08	2.84235e-08	4.3873e-08	4.08245e-08	4.80754e-08	4.3253e-08	3.02834e-08	4.00289e-08	2.89734e-08
1080.62	7.71079	2.02814e-08	0	1.02707e-08	1.49947e-08	2.23331e-08	1.84277e-09	0	0	1.7522e-25	1.94472e-08	6.23925e-09	1.4947e-09	5.48622e-09	7.75305e-09	9.053e-09	6.35965e-09	5.70812e-09
1089.04	7.7144	0	0	0	1.52336e-25	0	0	4.52402e-09	0	0	3.55552e-09	3.71225e-09	6.28021e-09	0	-4.10051e-10	3.47749e-09	2.24172e-09	0
1097.47	7.71801	0	0	0	0	0	5.21271e-10	0	1.02773e-09	2.05682e-09	6.10177e-10	1.19236e-09	5.89321e-10	-3.38705e-09	-3.88618e-09	-5.53154e-09	-1.51134e-08	-8.92124e-09
1105.9	7.72162	0	0	0	0	0	0	0	0	8.55161e-10	0	0	-9.59278e-10	0	0	0	0	0
1114.32	7.72523	2.69247e-09	3.89124e-09	4.39676e-09	1.56682e-09	-8.99553e-25	2.5303e-09	0	4.00856e-09	5.29225e-10	-1.50151e-09	4.7476e-09	3.51311e-09	-2.24291e-09	3.16865e-09	-6.83178e-10	-5.28018e-09	0
1122.75	7.72885	0	0	0	0	9.1319e-10	0	-1.938e-09	0	0	0	0	0	0	6.09176e-09	-6.64122e-09	0	0
1131.18	7.73246	5.52195e-09	4.66034e-09	1.22884e-09	1.22317e-09	0	-1.35376e-09	3.07659e-09	0	0	1.46989e-09	4.60068e-09	0	4.37735e-10	0	3.41595e-09	4.48812e-09	4.24221e-09
1139.61	7.73607	0	0	0	0	0	0	0	0	0	0	0	0	0	-5.28476e-09	1.23669e-24	0	0
1148.03	7.73968	0	0	-1.81857e-09	0	0	0	0	0	3.31505e-09	0	0	0	0	0	0	0	4.9056e-09
1156.46	7.74329	0	0	0	0	0	0	0	-1.76292e-09	0	0	0	0	-5.09986e-09	0	0	0	0
1164.89	7.7469	0	0	0	0	0	0	0	0	0	0	0	-5.11051e-10	0	0	0	0	0
1173.32	7.75052	0	0	0	0	0	0	0	0	0	0	0	0	0	0	0	-5.23691e-25	-8.31757e-09
1181.74	7.75413	0	0	0	0	0	0	0	0	0	0	0	0	0	0	0	0	0
1190.17	7.75774	0	0	1.98254e-09	9.01247e-10	0	0	0	0	2.27972e-09	0	0	0	-6.44776e-10	0	0	3.36545e-09	0
1198.6	7.76135	1.12113e-08	0	1.15013e-09	6.21725e-09	3.0462e-09	3.71693e-25	-2.64636e-09	3.40822e-09	1.50191e-10	8.06185e-09	4.19898e-09	3.52251e-09	2.83849e-09	8.0656e-09	1.55692e-08	-5.3841e-09	7.48898e-09
1206.8	7.3271	4.43317e-05	4.17907e-05	4.15897e-05	4.14098e-05	4.13084e-05	4.11224e-05	4.09734e-05	4.07122e-05	4.04877e-05	4.02229e-05	3.9839e-05	3.9669e-05	3.86825e-05	3.75227e-05	3.67742e-05	3.39578e-05	3.39383e-05
1215.2	7.76857	9.06168e-06	8.09663e-06	8.04856e-06	7.98392e-06	7.9373e-06	7.88112e-06	7.82088e-06	7.71318e-06	7.59258e-06	7.52228e-06	7.41276e-06	7.36096e-06	7.15953e-06	7.01241e-06	7.06046e-06	5.76876e-06	5.7315e-06
1223.6	8.1949	1.98821e-05	1.83623e-05	1.82648e-05	1.81863e-05	1.81114e-05	1.80378e-05	1.79667e-05	1.78223e-05	1.76754e-05	1.759e-05	1.74877e-05	1.7475e-05	1.69961e-05	1.64394e-05	1.60735e-05	1.4272e-05	1.4644e-05
1232.34	8.48475	1.83843e-06	1.63259e-06	1.61851e-06	1.61261e-06	1.59949e-06	1.59308e-06	1.58018e-06	1.56806e-06	1.55673e-06	1.53734e-06	1.52689e-06	1.53505e-06	1.49316e-06	1.47287e-06	1.45908e-06	1.19233e-06	1.2849e-06
1240.76	8.26	4.33425e-07	4.23716e-07	4.14835e-07	4.07617e-07	3.9624e-07	4.15963e-07	3.99345e-07	3.90247e-07	3.90146e-07	3.98354e-07	3.79158e-07	3.71222e-07	3.75545e-07	3.66126e-07	3.4773e-07	3.4557e-07	3.481e-07
1249.21	7.78302	2.08424e-07	1.22743e-07	1.20205e-07	1.19584e-07	1.2257e-07	1.22821e-07	1.10803e-07	1.23792e-07	1.18117e-07	1.18387e-07	1.23116e-07	1.18214e-07	1.17653e-07	1.16107e-07	9.94335e-08	1.20518e-07	9.89447e-08
1257.66	7.78663	2.34237e-07	1.78819e-07	1.67748e-07	1.78587e-07	1.94316e-07	1.74041e-07	1.68055e-07	1.7935e-07	1.66895e-07	1.76678e-07	1.7945e-07	1.62256e-07	1.55607e-07	1.43199e-07	1.74499e-07	1.34181e-07	1.17312e-07
1266.1	7.79024	2.36668e-07	2.18493e-07	2.24956e-07	2.26364e-07	2.08102e-07	2.08251e-07	2.27237e-07	2.14095e-07	2.17611e-07	2.24357e-07	2.22494e-07	2.04475e-07	2.00252e-07	2.26864e-07	2.7215e-07	1.9965e-07	2.42608e-07
1274.55	7.79386	2.15942e-09	-7.75109e-10	6.79451e-10	1.02405e-09	1.90957e-09	1.52624e-09	4.373e-09	-3.06699e-10	3.93835e-10	8.85014e-09	0	-3.44928e-09	0	-4.53728e-09	2.54757e-09	1.26726e-08	8.11891e-09
1283	7.79747	1.58822e-08	2.89846e-08	3.59748e-08	2.96541e-08	2.84435e-08	3.05504e-08	3.21849e-08	3.02917e-08	3.07182e-08	4.08173e-08	1.97097e-08	2.51624e-08	3.69857e-08	1.73451e-08	2.44983e-08	-7.93688e-09	4.65511e-08
1291.45	7.80108	2.24864e-06	2.02846e-06	2.00965e-06	1.99812e-06	1.96992e-06	1.98979e-06	2.0368e-06	1.99286e-06	2.06407e-06	2.02042e-06	2.17081e-06	2.27802e-06	2.34834e-06	2.29645e-06	1.92329e-06	5.45924e-07	-1.19626e-06
1299.9	7.80469	4.35638e-07	3.65284e-07	3.59067e-07	3.68961e-07	3.77493e-07	3.6717e-07	3.67074e-07	3.4775e-07	3.61196e-07	3.33852e-07	3.57928e-07	3.33477e-07	3.42082e-07	3.11844e-07	3.23321e-07	2.73874e-07	3.31567e-07
1308.34	7.8083	3.25502e-08	4.77182e-08	5.73266e-08	4.79639e-08	5.03033e-08	5.61819e-08	4.79034e-08	4.95578e-08	5.157e-08	3.84418e-08	2.89974e-08	5.68767e-08	2.81844e-08	4.8159e-08	5.68125e-08	4.62655e-08	5.48926e-08
1316.79	7.81191	9.07619e-06	8.72895e-06	8.70761e-06	8.67141e-06	8.66501e-06	8.61566e-06	8.62595e-06	8.5701e-06	8.51121e-06	8.45726e-06	8.42473e-06	8.35166e-06	8.07042e-06	7.83756e-06	7.76217e-06	8.50906e-06	1.05123e-05
1325.24	7.81553	8.63688e-07	7.57823e-07	7.60866e-07	7.54968e-07	7.61364e-07	7.57642e-07	7.61739e-07	7.50385e-07	7.47441e-07	7.50962e-07	6.92087e-07	6.32042e-07	5.90245e-07	5.248e-07	6.37732e-07	5.86599e-07	1.95805e-07
1333.69	7.81914	7.6572e-07	7.5505e-07	7.53052e-07	7.42015e-07	7.40155e-07	7.27258e-07	7.2655e-07	6.85249e-07	6.97971e-07	6.20934e-07	5.92478e-07	6.4224e-07	6.0888e-07	6.07597e-07	6.61414e-07	6.66419e-07	5.895e-07
1342.14	7.82275	3.38223e-06	3.38652e-06	3.39598e-06	3.42912e-06	3.38263e-06	3.39049e-06	3.38177e-06	3.39542e-06	3.34367e-06	3.36972e-06	3.31561e-06	3.33898e-06	3.28647e-06	3.34291e-06	3.39201e-06	3.44138e-06	3.66005e-06
1350.58	7.82636	3.68301e-07	3.43715e-07	2.82075e-07	3.08567e-07	3.4928e-07	3.44015e-07	2.88689e-07	2.64865e-07	3.4966e-07	2.99524e-07	2.46082e-07	3.22839e-07	3.23624e-07	2.96026e-07	4.13026e-07	2.66982e-07	3.32183e-07
1359.03	7.82997	8.00143e-08	8.76774e-08	8.87756e-08	9.76812e-08	9.31515e-08	1.10206e-07	1.55478e-07	9.24261e-08	9.04038e-08	1.46035e-07	1.05099e-07	9.65992e-08	8.4468e-08	9.08227e-08	9.29447e-08	1.21895e-07	1.15861e-07
1367.48	7.83358	5.01445e-07	6.05888e-07	6.08062e-07	6.05437e-07	5.93155e-07	6.15736e-07	5.98677e-07	6.20742e-07	6.03114e-07	6.15142e-07	6.05648e-07	6.18764e-07	6.2303e-07	6.23827e-07	6.11092e-07	6.31405e-07	6.55545e-07
1375.93	7.8372	3.43283e-07	3.94636e-07	4.27457e-07	4.63479e-07	4.60538e-07	4.33478e-07	4.55628e-07	4.25227e-07	4.18073e-07	3.56166e-07	5.09229e-07	4.23845e-07	5.04454e-07	4.27524e-07	4.65881e-07	5.02215e-07	5.46737e-07
1384.37	7.84081	9.12867e-08	2.47756e-08	3.44118e-08	3.82211e-08	3.98378e-08	4.08689e-08	3.14547e-08	3.07079e-08	3.7883e-08	4.12062e-08	3.70735e-08	3.73709e-08	5.28612e-08	4.67596e-08	5.06201e-08	4.93348e-08	5.63543e-08
1392.82	7.84442	9.99965e-09	-1.48154e-08	-5.77766e-09	1.78593e-09	-4.30711e-09	-9.21078e-09	3.82227e-08	1.58306e-08	-9.40559e-10	-7.32464e-09	-9.57522e-09	5.32759e-08	-1.34087e-08	3.99807e-08	1.18029e-09	-2.28269e-10	-1.59133e-08
1401.27	7.84803	7.02299e-09	3.9373e-09	2.19925e-09	-1.19946e-09	4.357e-09	4.38107e-09	4.40586e-09	-8.81576e-11	4.51187e-09	2.77447e-09	-1.67462e-09	-1.28471e-10	-7.8597e-09	2.3864e-09	-4.15807e-09	1.10008e-08	-1.01009e-08
1409.72	7.85164	0	3.36162e-09	1.15958e-09	1.55812e-09	-4.2152e-09	-1.03534e-09	7.4869e-09	-5.48625e-09	-2.88808e-25	-8.75659e-09	-6.50492e-09	7.26937e-10	0	9.89476e-10	-2.51331e-09	-5.84465e-09	6.15026e-09
1418.17	7.85525	5.74244e-24	-1.42428e-09	2.59357e-08	4.74731e-09	6.64344e-09	-5.74925e-10	4.10731e-09	1.46674e-09	-3.82995e-09	-2.0139e-08	3.57132e-08	2.26206e-23	-1.45082e-09	2.68948e-09	-2.4191e-09	-3.96452e-09	2.13318e-09
1426.61	7.85887	9.48816e-07	6.22138e-07	6.16678e-07	5.91642e-07	5.89152e-07	5.91669e-07	5.89795e-07	5.75899e-07	5.70427e-07	5.94314e-07	6.10856e-07	5.4704e-07	5.07979e-07	4.77934e-07	5.03807e-07	4.42368e-07	4.05414e-07
1435.06	7.86248	0.000328307	0.000300508	0.000299082	0.000297683	0.000296226	0.000294816	0.00029335	0.000290449	0.000287559	0.000284604	0.000278646	0.000272642	0.000265874	0.000255235	0.000236123	0.000215153	0.000194171
1443.51	7.86609	0.000142222	0.000121673	0.00012114	0.000120673	0.000120178	0.000119671	0.000119138	0.000118168	0.000117252	0.000116251	0.000114556	0.000112961	0.000110624	0.000107242	0.000101899	9.55442e-05	9.0329e-05
1451.96	7.8697	1.05089e-05	9.896e-06	9.87854e-06	9.91102e-06	9.90185e-06	9.84264e-06	9.85188e-06	9.86218e-06	9.87401e-06	9.86037e-06	9.88721e-06	1.00523e-05	1.01276e-05	1.01653e-05	1.04485e-05	1.10575e-05	1.16327e-05
1460.4	7.87331	4.64182e-07	3.53543e-07	4.00354e-07	4.05747e-07	3.71008e-07	3.69521e-07	3.71695e-07	3.69782e-07	3.68905e-07	3.57669e-07	3.56981e-07	3.65656e-07	3.51441e-07	3.61596e-07	2.49572e-07	4.39112e-07	3.6569e-07
1468.85	7.87692	4.56912e-06	4.41607e-06	4.41319e-06	4.44731e-06	4.42753e-06	4.43435e-06	4.44947e-06	4.4325e-06	4.44542e-06	4.47301e-06	4.48577e-06	4.50219e-06	4.5331e-06	4.50935e-06	4.59614e-06	4.67007e-06	4.8009e-06
1477.3	7.88054	9.839e-06	1.0242e-05	1.01954e-05	1.01965e-05	1.01877e-05	1.02023e-05	1.01749e-05	1.01859e-05	1.02413e-05	1.02655e-05	1.02798e-05	1.03759e-05	1.04917e-05	1.09098e-05	1.172e-05	1.21632e-05	1.31442e-05
1485.75	7.88415	1.85611e-06	1.84986e-06	1.86029e-06	1.87274e-06	1.87069e-06	1.86181e-06	1.87818e-06	1.87844e-06	1.88653e-06	1.88094e-06	1.91608e-06	1.95926e-06	1.95254e-06	1.87064e-06	1.94311e-06	2.15752e-06	2.15719e-06
1494.2	7.88776	3.34488e-06	2.88124e-06	2.87259e-06	2.86242e-06	2.77535e-06	2.67751e-06	2.66791e-06	2.65111e-06	2.39063e-06	2.31628e-06	2.10936e-06	1.89744e-06	1.77264e-06	1.54834e-06	1.42262e-06	6.43833e-07	-6.90789e-08
1502.64	7.89137	5.14456e-07	5.45982e-07	5.24159e-07	5.43756e-07	5.36365e-07	5.5903e-07	5.75553e-07	5.4822e-07	5.17219e-07	5.7422e-07	5.35368e-07	5.81026e-07	5.22086e-07	6.06423e-07	6.10194e-07	6.1699e-07	7.02643e-07
1511.09	7.89498	2.69474e-09	8.1379e-09	6.65548e-09	1.89483e-08	7.55021e-09	3.02936e-08	2.5871e-09	-6.6608e-09	1.1569e-08	2.38199e-08	1.49246e-08	3.44245e-08	3.1016e-08	1.67832e-08	1.58212e-08	4.90555e-08	4.51738e-08
1519.54	7.89859	1.5159e-07	1.30128e-07	1.46479e-07	1.09694e-07	1.28673e-07	1.20081e-07	1.10938e-07	1.11482e-07	1.18191e-07	1.35941e-07	1.52771e-07	1.49752e-07	9.00451e-08	1.2039e-07	1.6336e-07	1.23462e-07	1.32219e-07
1527.99	7.90221	6.74971e-06	6.01971e-06	5.90596e-06	5.83047e-06	5.85221e-06	5.69708e-06	5.51774e-06	5.4091e-06	5.05256e-06	4.7702e-06	4.66692e-06	4.54504e-06	4.14237e-06	4.29558e-06	4.07926e-06	2.57147e-07	2.86945e-08
1536.43	7.90582	3.95303e-05	3.80101e-05	3.78217e-05	3.76293e-05	3.74467e-05	3.72877e-05	3.71272e-05	3.68525e-05	3.66476e-05	3.65069e-05	3.63887e-05	3.66505e-05	3.54296e-05	3.41288e-05	3.35578e-05	2.76735e-05	3.02215e-05
1544.88	7.90943	1.38612e-05	1.29284e-05	1.2912e-05	1.2847e-05	1.275e-05	1.27236e-05	1.26731e-05	1.25592e-05	1.2447e-05	1.24243e-05	1.22251e-05	1.21489e-05	1.17451e-05	1.1289e-05	1.19471e-05	9.37378e-06	9.11915e-06
1553.33	6.6598	1.12292e-07	2.2779e-07	2.40931e-07	1.95579e-07	2.38998e-07	2.29889e-07	2.24597e-07	2.06934e-07	2.25615e-07	2.03369e-07	2.27736e-07	2.39047e-07	2.11191e-07	1.35437e-07	2.21056e-07	1.20515e-07	3.68892e-07
1560.93	8.4042	3.14702e-07	3.61926e-07	3.7941e-07	3.68331e-07	3.709e-07	3.53559e-07	3.46481e-07	3.66883e-07	3.49642e-07	3.30212e-07	3.60044e-07	3.36942e-07	3.25422e-07	3.08179e-07	3.46521e-07	1.82703e-07	5.45872e-07
1569.23	7.8809	0.000135204	0.000148098	0.000147216	0.000146543	0.000145814	0.000144888	0.000144295	0.000142827	0.000141859	0.000140883	0.000139512	0.00013827	0.000134266	0.000128743	0.000121967	0.00010753	0.000106417
1577.61	7.45885	0.000180088	0.000207316	0.000206235	0.000205276	0.000204329	0.000203344	0.000202386	0.000200606	0.00019908	0.000197907	0.000195747	0.000194569	0.000190206	0.000184242	0.000177253	0.000154476	0.000143326
1586.31	7.4983	2.18287e-05	2.08126e-05	2.06467e-05	2.04501e-05	2.03096e-05	2.02409e-05	2.01142e-05	1.98925e-05	1.97385e-05	1.96048e-05	1.9282e-05	1.8924e-05	1.81041e-05	1.70824e-05	1.68304e-05	1.25999e-05	1.33602e-05
1594.96	7.7622	8.43139e-06	7.4842e-06	7.4372e-06	7.52245e-06	7.50885e-06	7.45782e-06	7.43634e-06	7.52077e-06	7.55848e-06	7.60341e-06	7.84629e-06	8.30517e-06	7.93133e-06	7.40415e-06	6.15823e-06	3.0012e-06	3.64892e-06
1603.38	7.93471	0.000205694	0.000245742	0.000244565	0.000243329	0.000242264	0.00024107	0.00024015	0.000238034	0.000236251	0.000234767	0.000231889	0.000230013	0.000223939	0.000214566	0.000202901	0.000173655	0.000161763
1611.79	7.93832	0.000135675	0.000156279	0.000155417	0.000154538	0.000153597	0.000153147	0.000152174	0.000150883	0.00014954	0.000148762	0.000146653	0.000145385	0.000141239	0.000135304	0.000129505	0.000108759	0.000105345
1620.21	7.94194	1.48299e-05	1.26293e-05	1.24103e-05	1.24209e-05	1.2265e-05	1.21944e-05	1.19637e-05	1.17809e-05	1.14498e-05	1.14002e-05	1.08364e-05	1.05346e-05	9.89037e-06	9.52398e-06	9.91468e-06	9.04606e-06	9.98474e-06
1628.63	7.94555	4.10558e-06	3.83055e-06	3.88492e-06	3.64031e-06	3.4432e-06	3.47641e-06	3.10532e-06	3.09226e-06	2.5944e-06	2.45432e-06	2.55574e-06	2.60287e-06	2.62953e-06	2.16935e-06	1.06879e-06	-2.0375e-06	-2.72044e-06
1637.05	7.94916	1.18442e-05	1.11552e-05	1.11648e-05	1.09808e-05	1.09634e-05	1.08762e-05	1.07657e-05	1.06492e-05	1.06607e-05	1.0615e-05	1.0568e-05	1.06948e-05	1.0285e-05	9.69737e-06	8.60558e-06	5.32653e-06	6.44887e-06
1645.47	7.95277	3.18402e-05	3.08282e-05	3.07015e-05	3.05633e-05	3.04742e-05	3.03529e-05	3.02751e-05	3.01669e-05	3.0099e-05	3.0135e-05	3.0315e-05	3.09133e-05	2.9784e-05	2.84092e-05	2.77069e-05	2.35635e-05	2.88083e-05
1653.89	7.95638	1.41361e-05	1.31401e-05	1.30434e-05	1.29697e-05	1.28928e-05	1.28347e-05	1.28839e-05	1.27909e-05	1.27453e-05	1.26789e-05	1.28202e-05	1.31174e-05	1.27806e-05	1.2237e-05	1.31181e-05	1.16875e-05	1.54423e-05
1662.31	7.95999	2.61119e-06	2.45792e-06	2.33303e-06	2.31487e-06	2.16748e-06	2.14721e-06	2.21177e-06	1.93281e-06	1.97469e-06	1.98841e-06	2.0359e-06	2.1125e-06	1.95278e-06	1.43918e-06	7.53119e-07	-5.31417e-07	-6.93995e-07
1670.73	7.96361	1.03018e-06	9.33706e-07	9.52593e-07	9.26543e-07	9.26095e-07	9.21277e-07	9.0284e-07	9.18987e-07	9.2347e-07	8.74629e-07	8.77981e-07	9.09903e-07	8.70029e-07	8.84604e-07	8.56661e-07	6.3946e-07	8.9211e-07
1679.15	7.96722	2.73353e-07	2.37166e-07	2.22553e-07	2.40822e-07	2.26182e-07	2.24051e-07	2.61888e-07	2.14111e-07	2.08756e-07	2.25793e-07	2.49127e-07	2.30435e-07	2.35598e-07	2.45747e-07	2.56474e-07	1.40844e-07	1.82828e-07
1687.57	7.97083	1.05252e-07	9.20354e-08	7.53363e-08	7.00725e-08	1.05463e-07	8.48608e-08	9.13351e-08	9.19175e-08	9.14602e-08	1.06774e-07	8.99365e-08	9.89084e-08	3.13011e-08	1.16709e-07	1.08307e-07	7.68977e-08	1.05834e-07
1695.99	7.97444	1.04622e-08	1.03808e-09	7.63906e-09	2.82349e-09	1.45e-09	2.97921e-09	3.11332e-08	2.94744e-08	3.65283e-08	2.42187e-08	6.21622e-08	2.27851e-09	2.02067e-08	1.41739e-08	-1.14849e-08	1.32934e-08	1.12275e-08
1704.41	7.97805	1.01404e-08	1.4699e-08	1.11125e-08	1.57913e-08	5.71449e-09	4.62444e-08	2.11484e-08	1.90873e-08	6.05504e-09	1.3535e-08	2.22918e-08	2.18206e-08	3.35255e-08	2.84762e-08	2.05081e-08	5.00272e-09	1.51366e-08
1712.83	7.98166	1.67576e-08	1.48551e-08	1.4809e-08	2.40989e-08	3.24516e-24	1.94568e-08	1.15096e-08	3.94295e-08	1.98943e-08	8.46213e-09	1.26756e-08	3.37908e-08	4.59505e-08	2.18784e-08	1.18622e-08	3.42245e-09	4.53961e-09
1721.25	7.98528	1.55937e-08	3.63037e-08	5.22422e-09	2.09948e-08	1.60192e-08	1.31993e-08	0	0	2.71038e-08	2.06347e-08	9.34016e-09	1.1163e-08	9.4506e-09	1.485e-08	2.46819e-08	1.17313e-08	-1.65119e-08
1729.67	7.98889	0	-1.60399e-24	0	0	7.54328e-09	1.27271e-08	0	0	0	1.66234e-08	0	0	8.2798e-09	-1.27349e-09	-4.48017e-09	6.66953e-09	8.50599e-09
1738.08	7.9925	0	0	0	5.72157e-09	1.03244e-08	0	0	0	0	-1.56525e-08	0	9.1862e-09	0	0	0	8.54104e-10	8.78551e-09
1746.5	7.99611	0	0	4.74125e-09	0	-4.7156e-09	0	0	-2.00447e-08	0	0	3.15928e-09	0	0	0	0	-1.88493e-08	-1.20861e-09
1754.92	7.99972	2.87818e-07	3.1144e-07	2.8828e-07	2.47889e-07	2.72178e-07	2.59754e-07	2.72927e-07	2.69226e-07	2.91868e-07	2.46297e-07	3.65732e-07	3.07774e-07	2.23226e-07	3.01137e-07	2.42684e-07	2.90756e-07	3.97584e-07
1763.34	8.00333	2.19836e-07	1.84421e-07	1.6647e-07	1.66216e-07	1.72651e-07	2.2034e-07	1.94326e-07	1.69248e-07	1.61172e-07	1.85833e-07	1.40992e-07	1.44842e-07	2.01448e-07	1.65355e-07	1.75474e-07	1.774e-07	1.95703e-07
1771.76	8.00695	4.86334e-08	6.98817e-08	6.65053e-08	1.78587e-08	7.26585e-08	3.44479e-08	2.08805e-08	2.96699e-08	5.94189e-09	6.61856e-09	5.53406e-08	5.34761e-08	0	5.75907e-08	6.05068e-09	4.29116e-08	3.26045e-08
1780.18	8.01056	0	1.48728e-08	1.37361e-08	-7.00799e-09	0	2.64477e-08	1.66327e-08	3.36341e-08	1.28889e-08	4.07186e-08	-2.65722e-24	0	5.56775e-09	0	2.04026e-10	-1.74208e-09	8.53933e-09
1788.6	8.01417	2.60904e-07	3.05737e-07	2.80285e-07	2.68482e-07	2.25687e-07	2.77904e-07	3.10914e-07	2.69158e-07	1.94095e-07	2.32432e-07	2.84004e-07	2.16548e-07	2.15504e-07	1.88712e-07	2.27569e-07	3.18715e-07	3.78426e-07
1797.02	8.01778	9.01126e-08	1.36897e-07	1.51854e-07	1.6669e-07	9.48908e-08	1.40541e-07	1.02867e-07	1.73381e-07	1.44624e-07	1.16118e-07	1.06162e-07	1.32977e-07	1.49749e-07	1.8777e-07	1.87122e-07	2.20562e-07	2.6666e-07
1805.44	8.02139	6.82352e-08	5.10786e-08	5.52365e-08	3.51305e-08	5.72537e-08	1.84081e-08	1.3847e-09	1.37432e-08	2.00768e-08	1.20284e-08	9.80519e-09	5.27624e-08	1.40656e-08	3.28384e-08	4.78476e-08	2.48118e-08	4.66818e-08
1813.86	8.025	5.7769e-11	2.05381e-09	-4.07813e-09	1.1482e-08	1.13046e-08	7.67637e-10	1.22126e-08	1.4113e-08	-5.40999e-09	-2.01844e-09	8.82344e-09	7.12789e-09	1.25089e-08	1.66122e-08	2.09367e-08	8.82443e-09	2.22136e-08
1822.28	8.02862	-3.92179e-09	-4.46644e-08	-3.69986e-08	-1.45157e-09	-1.92426e-08	-3.81623e-08	6.83292e-09	-4.31238e-08	-5.19836e-08	-4.03019e-08	-3.73269e-08	-4.88392e-08	-5.84042e-08	-6.60009e-08	-8.17889e-08	-9.21862e-08	-7.69896e-08
1830.7	8.03223	5.37587e-08	1.36194e-07	1.46095e-07	1.31555e-07	1.3694e-07	1.14081e-07	1.32361e-07	1.38152e-07	1.26948e-07	1.39648e-07	1.36184e-07	1.10728e-07	1.36597e-07	1.52041e-07	1.28014e-07	1.13279e-07	1.43713e-07
1839.12	8.03584	-1.46856e-08	-1.56225e-08	-1.56237e-08	-1.5625e-08	-7.7902e-08	-1.56281e-08	-1.56299e-08	-1.56342e-08	-1.56396e-08	-1.9361e-08	-8.18123e-08	-1.94183e-08	-1.57353e-08	-1.58376e-08	-1.61718e-08	-1.68642e-08	-1.75921e-08
1847.54	8.03945	-2.20019e-08	-5.43463e-08	-5.44371e-08	-5.45323e-08	-5.46329e-08	-5.79024e-08	-5.80196e-08	-5.69074e-08	-5.71793e-08	-5.74777e-08	-5.81665e-08	-5.89945e-08	-5.80864e-08	-9.89096e-08	-6.45078e-08	-7.13528e-08	-7.77551e-08
1855.96	8.04306	-5.76854e-08	-8.85112e-08	-8.98687e-08	-8.99316e-08	-8.99995e-08	-6.75423e-08	-9.01502e-08	-9.03224e-08	-9.05192e-08	-9.07437e-08	-9.12921e-08	-9.19982e-08	-9.29277e-08	-9.48325e-08	-9.99142e-08	-1.08453e-07	-1.16765e-07
1864.38	8.04667	1.22393e-07	1.28013e-07	1.31697e-07	1.36335e-07	1.14373e-07	1.46948e-07	1.27289e-07	1.85792e-07	1.58057e-07	1.71989e-07	1.50719e-07	1.36263e-07	1.27982e-07	1.69236e-07	1.60117e-07	1.82938e-07	1.90927e-07
1872.79	8.05029	1.95349e-05	1.94526e-05	1.94719e-05	1.94852e-05	1.95043e-05	1.95361e-05	1.95643e-05	1.94678e-05	1.95411e-05	1.95722e-05	1.95782e-05	1.96421e-05	1.96044e-05	1.96346e-05	1.9563e-05	1.98643e-05	2.01544e-05
1881.21	8.0539	6.30161e-05	4.64236e-05	4.62809e-05	4.62448e-05	4.61504e-05	4.59753e-05	4.58699e-05	4.56618e-05	4.54895e-05	4.51753e-05	4.47069e-05	4.4194e-05	4.36862e-05	4.27764e-05	4.1e-05	3.91204e-05	3.75718e-05
1889.63	8.05751	1.62426e-05	1.59729e-05	1.59965e-05	1.59755e-05	1.59498e-05	1.59767e-05	1.59572e-05	1.6002e-05	1.60238e-05	1.60179e-05	1.60069e-05	1.6059e-05	1.61973e-05	1.63673e-05	1.68717e-05	1.7925e-05	1.89417e-05
1898.05	8.06112	3.95419e-06	5.74229e-06	5.83966e-06	5.83095e-06	5.83778e-06	5.85278e-06	5.8531e-06	5.90968e-06	5.9036e-06	5.98825e-06	6.07703e-06	6.14059e-06	6.33527e-06	6.5233e-06	6.99941e-06	7.87864e-06	8.64798e-06
1906.47	8.06473	2.35912e-06	4.90742e-06	4.8261e-06	4.96025e-06	4.93327e-06	5.01633e-06	4.99535e-06	4.98612e-06	4.95423e-06	4.99291e-06	5.10846e-06	5.11778e-06	5.24749e-06	5.43946e-06	5.94782e-06	6.50667e-06	7.13546e-06
1914.89	8.06834	5.74873e-07	7.53137e-07	7.6904e-07	7.42955e-07	7.87087e-07	7.15802e-07	8.16809e-07	7.62473e-07	7.32751e-07	7.36103e-07	7.74514e-07	8.34434e-07	8.04572e-07	8.34837e-07	7.95742e-07	1.11341e-06	1.0216e-06
1923.31	8.07196	5.34062e-07	6.25982e-07	5.88969e-07	6.37981e-07	5.94318e-07	6.46116e-07	6.58422e-07	6.5244e-07	6.03018e-07	6.29059e-07	6.21133e-07	6.8784e-07	6.80113e-07	6.94626e-07	7.64528e-07	8.35831e-07	9.79208e-07
1931.73	8.07557	2.68145e-06	2.31749e-06	2.05299e-06	2.13826e-06	2.097e-06	2.0621e-06	2.08022e-06	2.04754e-06	2.06914e-06	2.11445e-06	2.09164e-06	2.09692e-06	2.1399e-06	2.20869e-06	2.35662e-06	2.41604e-06	2.73258e-06
1940.15	8.07918	0.000147973	0.000104577	0.000103835	0.000102846	0.000102188	0.00010128	0.000100551	9.89696e-05	9.73478e-05	9.58002e-05	9.257e-05	8.96486e-05	8.63815e-05	8.17723e-05	7.49557e-05	6.89337e-05	6.43291e-05
1948.57	8.08279	0.000733481	0.000640188	0.000636515	0.000632785	0.000629098	0.000625267	0.000621548	0.000613891	0.000606222	0.000598501	0.000582886	0.000567134	0.000550273	0.000523417	0.000472921	0.000421063	0.000364532
1956.99	8.0864	0.00156299	0.0012765	0.00127066	0.00126472	0.00125873	0.0012527	0.00124661	0.00123426	0.00122173	0.00120898	0.00118268	0.00115563	0.00112569	0.00107707	0.000982227	0.000881302	0.000781581
1965.41	8.09001	0.00115953	0.00103549	0.00103087	0.00102599	0.00102132	0.00101673	0.00101206	0.00100265	0.000993496	0.000984272	0.000965688	0.000946724	0.000926125	0.000894192	0.000834788	0.000774531	0.000707927
1973.83	8.09363	0.000358402	0.000369536	0.000367808	0.000366059	0.000364299	0.000362627	0.000360671	0.000357318	0.00035389	0.000350308	0.000343309	0.000336231	0.000327386	0.000312927	0.000283919	0.000250348	0.000214695
1982.25	8.09724	6.34958e-05	5.85515e-05	5.81482e-05	5.77809e-05	5.78358e-05	5.72293e-05	5.72071e-05	5.63692e-05	5.62122e-05	5.60582e-05	5.53533e-05	5.55406e-05	5.45949e-05	5.28009e-05	5.19061e-05	4.36786e-05	4.61929e-05
1990.67	8.10085	5.38561e-05	5.21598e-05	5.21527e-05	5.18311e-05	5.18753e-05	5.17986e-05	5.18376e-05	5.19817e-05	5.21965e-05	5.25722e-05	5.38173e-05	5.54876e-05	5.45029e-05	5.38144e-05	5.51898e-05	5.26958e-05	6.2848e-05
1999.09	8.10446	0.00124493	0.00114443	0.00114068	0.00113692	0.00113319	0.00112934	0.00112536	0.00111762	0.00110959	0.00110135	0.00108433	0.00106629	0.00104768	0.00101698	0.000950862	0.0008847	0.000807024
2007.5	8.10807	0.00280721	0.00239158	0.00238027	0.00236866	0.00235675	0.00234506	0.00233301	0.00230834	0.00228302	0.00225683	0.00220185	0.00214248	0.00208681	0.00199353	0.00179819	0.00161085	0.00140537
2015.92	8.11168	0.00279365	0.00226761	0.00225547	0.00224324	0.0022309	0.00221852	0.00220601	0.0021808	0.00215508	0.00212888	0.00207478	0.00201771	0.00196243	0.00187229	0.00169053	0.00152086	0.00133046
2024.34	8.1153	0.000837561	0.000791739	0.00078814	0.000784432	0.000780735	0.000777062	0.000773373	0.000765825	0.000758547	0.000751044	0.000735897	0.000720118	0.000704826	0.000680012	0.000630833	0.000579203	0.000520624
2032.76	8.11891	0.00030316	0.000289642	0.000287702	0.000286005	0.000284333	0.000282789	0.000281261	0.000278451	0.000275891	0.000273617	0.000270187	0.000268187	0.000259916	0.000249832	0.000237992	0.000201194	0.000211475
2041.18	8.12252	0.000310058	0.000324349	0.000323371	0.000321538	0.000320657	0.000319136	0.000318104	0.000315603	0.000313933	0.000312107	0.00031008	0.000310983	0.000305198	0.000296292	0.000283625	0.000244914	0.000242419
2049.6	8.12613	0.000735884	0.000773942	0.000770556	0.000766653	0.000763323	0.000759847	0.000756244	0.000748505	0.000740421	0.000732152	0.000715395	0.000696844	0.000681305	0.000655184	0.000598624	0.000542187	0.000479109
2058.02	8.12974	0.000829577	0.000820074	0.000816488	0.000812724	0.000809132	0.000805771	0.000801985	0.00079456	0.00078764	0.000779636	0.000764819	0.000748584	0.000733352	0.000708394	0.000657444	0.000607863	0.000554066
2066.44	8.13335	0.000914352	0.000870241	0.000866101	0.00086205	0.000857741	0.000853603	0.0008497	0.000841259	0.000832851	0.000824303	0.000806485	0.000787901	0.000772257	0.00074699	0.000697909	0.000652402	0.000603847
2074.86	8.13697	0.000595855	0.000625087	0.00062214	0.000619131	0.000616079	0.000613477	0.000610517	0.000604614	0.000598778	0.000593191	0.000581485	0.000569938	0.000557158	0.000537352	0.000496757	0.000441574	0.000390139
2083.28	8.14058	0.000317366	0.000314039	0.000312154	0.0003103	0.000308506	0.000306833	0.00030526	0.000302224	0.000299489	0.000297134	0.000293489	0.000292398	0.000283722	0.00027195	0.000257881	0.000215337	0.000218599
2091.7	8.14419	0.00018917	0.000180879	0.000179734	0.000178464	0.000177204	0.000176127	0.000175082	0.000172918	0.000171373	0.000169634	0.000167674	0.000167183	0.000161069	0.000153385	0.000148929	0.000113198	0.000127299
2100.12	8.1478	6.59654e-05	6.30454e-05	6.2547e-05	6.24175e-05	6.20627e-05	6.17076e-05	6.13674e-05	6.10096e-05	6.14944e-05	6.17526e-05	6.31307e-05	6.44633e-05	6.2437e-05	6.0718e-05	5.89467e-05	3.68853e-05	6.02747e-05
2108.54	8.4804	2.67327e-05	2.45472e-05	2.45191e-05	2.43326e-05	2.43151e-05	2.42294e-05	2.41473e-05	2.4231e-05	2.45524e-05	2.43259e-05	2.52868e-05	2.62209e-05	2.61108e-05	2.55988e-05	1.84338e-05	9.63494e-06	3.21272e-05
2116.97	8.023	1.85952e-05	1.5712e-05	1.58125e-05	1.48359e-05	1.49797e-05	1.39734e-05	1.38311e-05	1.38444e-05	1.30463e-05	1.19903e-05	1.12721e-05	1.1342e-05	9.42783e-06	7.03609e-06	3.07656e-06	-1.24671e-05	-1.69289e-05
2125.41	8.476	3.03738e-06	2.88682e-06	2.75536e-06	2.61329e-06	2.61519e-06	2.35999e-06	2.35079e-06	2.14919e-06	1.99701e-06	1.98717e-06	1.88667e-06	1.9642e-06	1.5627e-06	1.25473e-06	1.4841e-06	-1.64362e-06	-2.20944e-06
2134.3	8.38695	1.73873e-06	1.53002e-06	1.52844e-06	1.57128e-06	1.51798e-06	1.51315e-06	1.49862e-06	1.43871e-06	1.38897e-06	1.47358e-06	1.59592e-06	1.45387e-06	1.34563e-06	1.23199e-06	1.35951e-06	-1.37631e-07	1.03593e-06
2142.31	8.12115	2.67934e-06	2.36408e-06	2.60177e-06	2.17942e-06	2.39915e-06	2.03782e-06	2.27849e-06	1.95746e-06	1.48488e-06	1.34077e-06	5.04365e-07	5.3944e-07	-1.14792e-07	-2.32111e-07	5.54137e-07	-5.78328e-06	-9.12074e-06
2150.88	8.16947	1.94287e-05	1.7421e-05	1.71762e-05	1.70532e-05	1.66975e-05	1.65769e-05	1.63768e-05	1.58685e-05	1.54429e-05	1.51332e-05	1.43288e-05	1.38219e-05	1.47292e-05	1.70983e-05	2.64754e-05	2.06942e-05	2.83329e-05
2159.31	8.17308	1.24932e-05	1.07834e-05	1.0283e-05	1.0032e-05	1.01546e-05	9.95842e-06	9.23698e-06	8.96091e-06	8.49498e-06	8.19447e-06	7.56824e-06	7.01942e-06	5.82337e-06	4.10849e-06	1.22937e-06	3.36767e-06	1.81992e-05
2167.73	8.1767	8.9139e-06	8.80408e-06	8.73894e-06	8.72102e-06	8.17147e-06	8.12451e-06	7.97866e-06	7.83324e-06	7.59517e-06	7.55254e-06	7.1766e-06	7.52146e-06	6.84555e-06	5.78105e-06	3.85837e-06	-1.00913e-06	3.15924e-06
2176.16	8.18031	2.45523e-06	1.79346e-06	1.7182e-06	2.08637e-06	2.04064e-06	1.98927e-06	1.95198e-06	2.12047e-06	2.19349e-06	2.47736e-06	2.48476e-06	2.56705e-06	2.27233e-06	1.11036e-06	7.25914e-08	-1.42905e-06	-2.54456e-06
2184.59	8.18392	6.54607e-07	5.81534e-07	5.60614e-07	6.20926e-07	5.40867e-07	5.34488e-07	5.3601e-07	6.46897e-07	5.63539e-07	5.20939e-07	6.41044e-07	4.4589e-07	6.00107e-07	6.05814e-07	6.47311e-07	4.23283e-07	8.3364e-07
2193.01	8.18753	6.97773e-07	6.71901e-07	6.40367e-07	6.01808e-07	6.26068e-07	6.93685e-07	6.69607e-07	6.43874e-07	6.72242e-07	6.33235e-07	5.27334e-07	5.71095e-07	6.52396e-07	6.40487e-07	7.60512e-07	4.11202e-07	1.03632e-06
2201.44	8.19114	9.14706e-08	2.0147e-07	6.43174e-08	7.47286e-08	9.60579e-08	0	7.2508e-08	3.11211e-24	1.37321e-07	8.43123e-08	6.42674e-08	5.54215e-08	6.35622e-08	7.36469e-08	6.4119e-08	4.44569e-08	4.80385e-08
2209.87	8.19475	2.87805e-07	1.29242e-07	3.93032e-07	1.74544e-07	2.64347e-07	2.83224e-07	3.38791e-07	1.68611e-07	3.41278e-07	3.39891e-07	2.57251e-07	3.32544e-07	2.68008e-07	2.72501e-07	2.8011e-07	1.26281e-07	4.26047e-07
2218.3	8.19837	1.51899e-07	7.85743e-08	1.44674e-07	1.41718e-07	2.27016e-07	1.50944e-07	1.54591e-07	1.89308e-07	1.40278e-07	1.37878e-07	2.34446e-07	1.05265e-07	1.62195e-07	1.51331e-07	1.2563e-07	1.13032e-07	8.98791e-08
2226.72	8.20198	2.05838e-07	3.34072e-07	3.00531e-07	1.55597e-07	1.40649e-07	1.31432e-07	1.15491e-07	2.03018e-07	1.19256e-07	1.90923e-07	3.63422e-07	1.49025e-07	1.42467e-07	1.32001e-07	1.68915e-07	-1.15082e-08	2.02306e-07
2235.15	8.20559	3.24992e-08	4.32096e-08	3.68269e-08	2.80525e-08	7.10422e-08	6.46569e-24	3.75636e-08	1.59718e-08	3.14958e-08	3.62412e-08	0	3.96127e-08	4.88249e-08	7.4665e-08	3.50737e-08	3.57621e-08	1.79987e-08
2243.58	8.2092	3.94614e-08	0	5.13182e-08	4.06249e-08	5.37929e-08	0	8.61897e-08	3.70731e-08	5.40455e-08	-1.7889e-08	3.5872e-08	3.5252e-08	3.11554e-08	3.3484e-08	2.12357e-08	2.9668e-08	3.66394e-08
2252.01	8.21281	2.1292e-07	0	8.43513e-08	2.31287e-07	2.79545e-07	1.74229e-07	2.05675e-07	3.46806e-07	2.10932e-07	1.72744e-07	6.06211e-08	1.73897e-07	1.54448e-07	1.91601e-07	1.66457e-07	1.01167e-07	6.81033e-08
2260.43	8.21642	1.37425e-07	2.42769e-07	1.94868e-07	8.65478e-08	1.1991e-07	1.37377e-07	5.63746e-08	1.69349e-07	1.17886e-07	4.45217e-09	1.71263e-07	1.10635e-07	1.00283e-07	9.14218e-08	1.36868e-07	1.16883e-07	9.82245e-08
2268.86	8.22004	7.95166e-08	4.84826e-08	8.26109e-08	0	2.37092e-23	0	1.68522e-07	1.57938e-08	0	3.2396e-08	1.98388e-08	1.94434e-08	2.75773e-08	3.39478e-08	5.92711e-09	4.03126e-08	-1.42665e-08
2277.29	8.22365	1.08001e-07	1.48646e-07	3.09791e-08	6.03639e-08	2.20185e-07	8.67548e-08	4.49897e-08	0	1.01418e-07	1.5097e-08	3.42689e-08	6.07922e-08	6.55705e-08	1.06484e-07	1.19782e-07	8.42984e-08	5.87277e-08
2285.71	8.22726	2.22556e-08	-7.61721e-09	0	0	0	5.66901e-08	9.22926e-09	5.19241e-09	5.6405e-08	-3.19301e-08	1.20462e-08	2.91258e-08	2.30613e-08	1.10176e-08	9.38674e-09	1.18779e-08	-7.57896e-08
2294.14	8.23087	1.62654e-08	0	0	0	0	0	0	0	5.93708e-09	4.3664e-24	1.85592e-08	1.63919e-08	1.17822e-08	1.8342e-08	1.92758e-08	-3.00677e-08	9.02736e-08
2302.57	8.23448	5.05475e-24	-8.50757e-09	0	0	0	0	0	-1.84965e-24	2.81154e-09	-5.38906e-08	1.23746e-09	-4.18437e-09	6.96581e-09	2.31505e-08	2.79027e-08	-9.60829e-09	0
2311	8.23809	0	0	-1.50235e-08	8.60869e-08	3.46674e-08	5.14776e-08	2.34284e-08	-2.55171e-08	6.76776e-08	0	-8.75979e-09	2.47606e-08	-2.3818e-09	2.18938e-09	-5.73935e-09	1.22363e-08	2.93324e-08
2319.42	8.24171	0	0	0	0	0	0	0	1.9301e-08	1.39755e-08	1.25212e-08	3.5446e-09	-3.40296e-09	-1.87832e-08	0	0	2.72906e-08	9.19409e-08
2327.85	8.24532	0	-1.83701e-23	0	0	0	0	0	0	-2.45946e-09	0	4.83984e-09	0	0	-6.12839e-09	9.15205e-24	0	0
2336.28	8.24893	0	0	0	0	0	-6.72197e-08	0	0	0	0	-7.06668e-09	2.37864e-08	0	0	-2.60392e-08	-3.59252e-08	1.04205e-07
2344.71	8.25254	0	0	0	0	-4.10694e-09	0	0	0	6.28036e-09	2.25754e-08	0	-1.75865e-09	5.26513e-09	0	-1.37097e-08	0	0
2353.13	8.25615	0	0	-7.46384e-09	0	0	0	0	0	-4.18871e-09	5.37412e-09	1.51402e-08	1.06302e-09	2.46723e-08	-3.32566e-09	0	0	-4.83187e-08
2361.56	8.25976	0	-1.0881e-07	0	0	-1.64261e-09	0	0	-1.04842e-07	0	0	-3.50728e-24	2.05311e-08	-1.4603e-08	8.8728e-09	0	-2.23548e-08	1.57658e-08
2369.99	8.26338	0	4.53565e-25	0	0	2.64952e-09	1.36287e-08	0	0	0	8.56703e-09	1.13996e-08	0	9.43709e-09	9.5042e-09	6.96937e-24	1.6755e-09	-4.11939e-09
2378.41	8.26699	0	3.90722e-08	0	-8.93182e-09	-4.66202e-09	0	0	-3.44421e-09	-1.23494e-08	0	-2.07971e-09	-2.01317e-24	0	-2.73571e-09	0	-3.60443e-08	-8.82207e-09
2386.84	8.2706	0	-6.20449e-09	0	2.28449e-24	4.09754e-09	0	0	3.44425e-09	8.52336e-09	6.89303e-09	2.93051e-09	1.28269e-08	8.48437e-24	3.035e-24	-3.02638e-08	0	-4.31364e-09
2395.27	8.27421	0	0	2.69858e-08	0	0	0	9.96141e-09	-4.60441e-09	4.54653e-10	1.28495e-09	2.10323e-09	9.11318e-09	2.82084e-08	1.26689e-08	1.38132e-08	5.33723e-08	9.14076e-08
2403.7	8.27782	2.72897e-08	7.91906e-09	0	9.95383e-09	0	0	2.83169e-24	0	0	-2.8932e-09	-1.7748e-08	-5.25525e-09	6.33578e-09	9.0289e-24	-1.46712e-08	1.41478e-23	3.00208e-08
2412.12	8.28143	0	0	0	2.57815e-09	3.16611e-09	0	0	4.86289e-08	0	4.98466e-09	1.24124e-08	8.40415e-09	1.64476e-08	0	2.8901e-08	0	1.35e-08
2420.55	8.28505	0	0	1.09705e-07	0	0	7.21227e-09	1.03775e-08	0	6.98535e-09	6.17129e-09	-1.28569e-08	-1.77824e-08	1.24649e-08	6.62395e-09	-3.07363e-08	3.29801e-09	1.56733e-08
2428.98	8.28866	0	0	0	0	3.4201e-09	5.8704e-09	2.41881e-09	0	1.20649e-08	-8.57487e-10	0	5.59875e-09	2.81616e-08	1.3933e-08	2.16914e-08	-1.3673e-08	6.33807e-09
2437.41	8.29227	0	0	0	4.81275e-09	0	3.04314e-23	0	0	7.08019e-09	8.33728e-09	0	5.35741e-09	-2.75562e-09	-2.5687e-24	0	-9.45391e-09	-1.52126e-08
2445.83	8.29588	0	0	0	0	0	7.12212e-10	7.01158e-09	4.67576e-09	0	-7.3616e-25	5.56005e-10	0	0	0	4.64047e-08	-1.31883e-24	-1.74413e-08
2454.26	8.29949	0	9.57099e-09	0	0	5.56331e-09	1.50468e-07	0	0	1.6028e-08	0	2.2637e-08	-9.76978e-24	4.68626e-08	1.83755e-08	4.99089e-08	3.54036e-08	-5.83638e-11
2462.69	8.3031	0	3.48531e-08	1.92004e-08	0	3.19021e-09	-1.92358e-09	1.38427e-08	5.50805e-08	1.28318e-08	3.04559e-08	3.16172e-09	1.21485e-08	1.90334e-08	1.20351e-08	1.92307e-08	-5.60031e-09	5.35299e-08
2471.11	8.30672	9.90202e-08	2.87758e-08	2.61583e-08	3.58151e-08	5.40618e-08	5.19693e-08	5.7566e-08	3.87377e-08	4.2235e-08	6.09787e-08	4.40951e-08	4.45001e-08	7.29497e-08	2.70072e-08	1.51421e-07	-2.48987e-08	4.96689e-08
2479.54	8.31033	4.49864e-07	4.5533e-07	4.59899e-07	4.61787e-07	4.64609e-07	4.35131e-07	4.56363e-07	4.33928e-07	4.20453e-07	4.36992e-07	4.26563e-07	3.92495e-07	4.01145e-07	3.93543e-07	4.40802e-07	4.53591e-07	4.87274e-07
2487.97	8.31394	5.23735e-06	6.08782e-06	6.06578e-06	6.08567e-06	6.16469e-06	6.17825e-06	6.19359e-06	6.28473e-06	6.41418e-06	6.51479e-06	6.6777e-06	6.82885e-06	7.04709e-06	7.42591e-06	9.01057e-06	1.22749e-05	1.67407e-05
2496.4	8.31755	1.76388e-06	1.79641e-06	1.75477e-06	1.78977e-06	1.80675e-06	1.78472e-06	1.74945e-06	1.76301e-06	1.77961e-06	1.76477e-06	1.79885e-06	1.80115e-06	1.8309e-06	1.83836e-06	1.97346e-06	2.31149e-06	2.61897e-06
2504.82	8.32116	1.36163e-06	1.16243e-06	1.19221e-06	1.14859e-06	1.19314e-06	1.13526e-06	1.19426e-06	1.15082e-06	1.14724e-06	1.14641e-06	1.22279e-06	1.15341e-06	1.20872e-06	1.17058e-06	1.26215e-06	1.37628e-06	1.60828e-06
2513.25	8.32477	1.65846e-06	1.41484e-06	1.39546e-06	1.48352e-06	1.33105e-06	1.43019e-06	1.36281e-06	1.40155e-06	1.42683e-06	1.27868e-06	1.31929e-06	1.27192e-06	1.36392e-06	1.44841e-06	1.43088e-06	1.52193e-06	1.63097e-06

## Sheet: k_EMIT
Wavelength	FWHM	k_Summer_L	k_Summer_M	k_Summer_H	k_Winter_L	k_Winter_M	k_Winter_H	k_1976_L	k_1976_M	k_1976_H
1006.83	8.529	0	0	0	0	0	0	0	0	0	0	0	0	0	0	0	0	0
1014.29	8.53	0	0	0	0	0	0	0	0	0	0	0	0	0	0	0	0	0
1021.76	8.531	0	0	0	0	0	0	0	0	0	0	0	0	0	0	0	0	0
1029.22	8.533	0	0	0	0	0	0	0	0	0	0	0	0	0	0	0	0	0
1036.68	8.534	5.85108e-07	5.15403e-07	4.55369e-07	4.99075e-07	4.88661e-07	4.61709e-07	4.50972e-07	4.45736e-07	4.68438e-07	5.10889e-07	4.56345e-07	4.58218e-07	4.51376e-07	4.36372e-07	4.33361e-07	3.78904e-07	3.91404e-07
1044.14	8.536	1.19021e-07	1.34489e-07	1.29121e-07	9.64095e-08	1.08174e-07	1.1948e-07	6.057e-08	9.47053e-08	1.0488e-07	9.76629e-08	1.02988e-07	1.06969e-07	1.01181e-07	9.45377e-08	8.84541e-08	8.52272e-08	9.98897e-08
1051.6	8.537	1.44765e-06	1.20796e-06	1.19618e-06	1.24019e-06	1.16253e-06	1.12227e-06	1.08646e-06	1.04855e-06	9.11617e-07	8.40124e-07	6.16764e-07	4.9229e-07	3.24587e-07	1.8157e-08	-4.46036e-07	-9.97503e-07	-1.32879e-06
1059.06	8.538	1.07277e-07	1.09642e-07	1.22913e-07	7.03636e-08	5.36469e-08	1.35905e-07	1.14269e-07	1.41789e-07	1.30438e-07	7.77483e-08	1.07785e-07	1.06342e-07	9.18099e-08	1.0098e-07	9.87463e-08	6.68315e-08	9.10406e-08
1066.52	8.54	2.47544e-07	2.78591e-07	3.17678e-07	2.40788e-07	2.12493e-07	3.23138e-07	2.64786e-07	2.27107e-07	2.08691e-07	2.8226e-07	2.45461e-07	2.49897e-07	2.34168e-07	2.31783e-07	2.20531e-07	2.15967e-07	2.06698e-07
1073.98	8.541	4.69803e-08	4.24569e-08	5.78777e-08	7.68102e-09	4.19554e-08	2.33716e-08	0	6.0756e-08	1.78133e-08	2.92392e-08	3.32409e-08	2.83659e-08	3.47389e-08	3.56258e-08	3.20165e-08	2.93247e-08	2.69872e-08
1081.44	8.543	8.7186e-09	0	0	1.67919e-08	1.07376e-08	2.01315e-09	0	0	9.43679e-26	1.557e-08	5.24518e-09	5.04278e-10	4.22097e-09	4.69961e-09	5.01958e-09	5.10963e-09	9.3273e-09
1088.9	8.544	0	0	0	-2.17029e-25	0	0	4.0159e-09	0	0	3.15243e-09	3.31825e-09	4.59035e-09	0	-3.63136e-10	3.08177e-09	1.98926e-09	4.0974e-09
1096.36	8.545	0	0	0	0	0	3.80902e-10	0	1.04907e-09	1.66159e-09	1.15832e-09	2.11179e-09	3.74172e-09	-3.16131e-09	-3.39498e-09	-5.05566e-09	-1.34386e-08	-1.01104e-08
1103.82	8.547	0	0	0	0	0	5.17303e-10	0	9.25563e-10	1.12017e-09	0	0	-1.36059e-09	2.93255e-09	9.15e-10	0	0	0
1111.28	8.548	0	4.28197e-10	9.35143e-10	-2.56935e-10	-3.03317e-25	0	0	2.47869e-09	-2.7713e-10	-9.93976e-10	2.92441e-09	2.38659e-09	-1.14119e-09	9.61178e-25	-1.81889e-09	0	0
1118.74	8.55	2.73129e-09	3.12126e-09	2.79026e-09	3.24798e-10	1.31047e-09	3.79799e-10	-1.56143e-09	2.71114e-10	1.29657e-09	4.81013e-10	-1.84807e-25	-4.07794e-09	-1.99391e-09	1.12019e-08	-6.35284e-09	-7.9272e-09	0
1126.2	8.551	3.09737e-09	0	0	0	0	1.10391e-09	2.84111e-09	0	0	0	0	0	4.3225e-09	0	0	0	0
1133.66	8.552	3.45507e-09	4.59531e-09	1.39101e-09	7.82554e-10	0	-9.76897e-10	1.2991e-25	0	4.66436e-09	1.6676e-09	3.3544e-09	0	-4.07147e-10	-8.35251e-09	3.89125e-09	4.57863e-09	4.32726e-09
1141.11	8.554	0	0	0	0	0	0	0	0	0	0	0	0	0	0	0	0	0
1148.57	8.555	0	0	-1.92374e-09	0	0	0	0	0	3.69219e-09	0	0	0	0	0	0	0	5.15411e-09
1156.03	8.557	0	0	0	0	0	0	0	-1.63949e-09	0	0	0	0	-4.92626e-09	0	0	0	0
1163.49	8.558	0	0	0	0	0	0	0	0	0	0	0	-4.65175e-10	0	0	0	0	0
1170.95	8.559	0	0	0	0	0	0	0	0	0	0	0	0	0	0	0	-2.68297e-24	-1.19694e-08
1178.4	8.561	0	0	0	0	0	0	0	0	0	0	0	0	0	0	0	0	0
1185.86	8.562	0	0	0	0	0	0	0	0	0	0	0	0	0	0	0	0	0
1193.32	8.564	0	0	2.86693e-09	1.30357e-09	0	0	-1.35961e-09	0	3.44099e-09	1.41155e-09	0	0	-1.06084e-09	0	0	4.184e-09	0
1200.78	8.565	1.4749e-05	1.37505e-05	1.36904e-05	1.3646e-05	1.35841e-05	1.35297e-05	1.34787e-05	1.33957e-05	1.33022e-05	1.32363e-05	1.31221e-05	1.30699e-05	1.27988e-05	1.24732e-05	1.2227e-05	1.13297e-05	1.14913e-05
1208.23	8.566	3.42056e-05	3.22542e-05	3.20924e-05	3.19476e-05	3.1865e-05	3.17108e-05	3.15926e-05	3.1376e-05	3.11976e-05	3.09822e-05	3.06689e-05	3.05282e-05	2.97695e-05	2.89004e-05	2.84331e-05	2.59901e-05	2.58178e-05
1215.69	8.568	1.34624e-05	1.22027e-05	1.21369e-05	1.2055e-05	1.19932e-05	1.19199e-05	1.18444e-05	1.17119e-05	1.15698e-05	1.14783e-05	1.13403e-05	1.12787e-05	1.09785e-05	1.0717e-05	1.06813e-05	9.06417e-06	9.09125e-06
1223.15	8.569	2.29626e-05	2.12768e-05	2.11692e-05	2.1077e-05	2.09931e-05	2.09092e-05	2.0828e-05	2.06679e-05	2.0508e-05	2.04101e-05	2.02905e-05	2.02728e-05	1.97384e-05	1.91305e-05	1.87378e-05	1.67398e-05	1.71513e-05
1230.6	8.571	2.71625e-06	2.36776e-06	2.34081e-06	2.32761e-06	2.30928e-06	2.28982e-06	2.27147e-06	2.23252e-06	2.17389e-06	2.13871e-06	2.07495e-06	2.04188e-06	1.98043e-06	1.94884e-06	1.94548e-06	1.50153e-06	1.58359e-06
1238.06	8.572	8.95384e-07	7.96376e-07	7.88077e-07	7.8354e-07	7.75046e-07	7.83984e-07	7.61819e-07	7.58918e-07	7.60229e-07	7.56265e-07	7.36503e-07	7.28155e-07	7.19004e-07	6.8635e-07	6.65441e-07	6.39212e-07	6.50415e-07
1245.52	8.573	1.19566e-08	5.88562e-08	5.68011e-08	5.23093e-08	4.11995e-08	5.75627e-08	5.59739e-08	4.6619e-08	4.77957e-08	4.81236e-08	5.93611e-08	4.29014e-08	5.39425e-08	7.17622e-08	5.52834e-08	4.1327e-08	4.86352e-08
1252.97	8.575	2.87912e-07	2.004e-07	1.92364e-07	2.00681e-07	2.1205e-07	2.02825e-07	1.95536e-07	1.99226e-07	1.86097e-07	1.8906e-07	1.86453e-07	1.97754e-07	1.8788e-07	1.88025e-07	1.75936e-07	1.79132e-07	1.23612e-07
1260.43	8.576	2.51309e-07	2.10416e-07	2.01843e-07	2.06022e-07	2.16487e-07	1.97559e-07	2.05327e-07	2.02176e-07	2.06759e-07	2.00093e-07	2.09373e-07	1.91833e-07	1.82233e-07	1.69212e-07	2.19597e-07	1.78169e-07	2.07923e-07
1267.88	8.578	1.54347e-07	1.37746e-07	1.456e-07	1.44794e-07	1.33042e-07	1.34592e-07	1.45913e-07	1.37973e-07	1.38607e-07	1.56861e-07	1.39427e-07	1.31493e-07	1.28207e-07	1.48663e-07	1.76584e-07	1.34258e-07	1.49525e-07
1275.34	8.579	0	6.35105e-10	3.34185e-09	7.89358e-10	2.90131e-09	-7.97418e-10	4.00604e-09	-3.72802e-10	1.63794e-09	7.21109e-09	0	-2.76188e-09	0	-5.12536e-09	1.97196e-09	1.13576e-08	6.28504e-09
1282.79	8.58	2.78498e-08	3.43384e-08	4.17857e-08	3.28037e-08	3.33943e-08	3.27451e-08	3.6623e-08	3.45982e-08	3.46599e-08	4.51179e-08	2.34963e-08	2.99159e-08	4.00934e-08	2.25025e-08	3.29021e-08	3.59286e-09	5.66988e-08
1290.25	8.582	1.95644e-06	1.78589e-06	1.7722e-06	1.76207e-06	1.73763e-06	1.7644e-06	1.76997e-06	1.73012e-06	1.75104e-06	1.68803e-06	1.76153e-06	1.82623e-06	1.88959e-06	1.86857e-06	1.75475e-06	7.32224e-07	-7.21285e-07
1297.71	8.583	1.08276e-06	7.23625e-07	7.33134e-07	7.23997e-07	7.26018e-07	7.04307e-07	7.49651e-07	7.34503e-07	7.94296e-07	7.87712e-07	8.27201e-07	7.49928e-07	6.46724e-07	3.47075e-07	-4.14557e-07	-1.19251e-06	-1.66692e-06
1305.16	8.585	9.41765e-09	6.82352e-09	1.4228e-08	1.36501e-08	1.46693e-08	1.37033e-08	1.44834e-08	9.91315e-09	1.32281e-08	4.81907e-09	1.57104e-09	6.34596e-09	1.66538e-08	2.31378e-08	2.49891e-08	-2.11402e-09	1.03897e-08
1312.61	8.586	4.86188e-06	4.55149e-06	4.52581e-06	4.50594e-06	4.51421e-06	4.49479e-06	4.48029e-06	4.46752e-06	4.41501e-06	4.40851e-06	4.36497e-06	4.35812e-06	4.18326e-06	3.99205e-06	3.99521e-06	4.35451e-06	5.18625e-06
1320.07	8.587	5.86399e-06	5.80756e-06	5.8044e-06	5.79127e-06	5.79074e-06	5.77107e-06	5.7843e-06	5.76126e-06	5.7445e-06	5.72129e-06	5.69226e-06	5.65335e-06	5.48259e-06	5.39421e-06	5.58759e-06	6.19285e-06	7.22738e-06
1327.52	8.589	1.55878e-07	1.63764e-07	1.69907e-07	1.59997e-07	1.61015e-07	1.56314e-07	1.66898e-07	1.51874e-07	1.6894e-07	1.70652e-07	1.46088e-07	1.3409e-07	1.53633e-07	1.39038e-07	1.58983e-07	1.53045e-07	1.24894e-07
1334.98	8.59	1.75842e-06	1.95883e-06	1.95891e-06	1.95561e-06	1.95555e-06	1.94762e-06	1.94673e-06	1.90965e-06	1.92804e-06	1.86669e-06	1.87156e-06	1.95238e-06	1.94921e-06	2.00152e-06	2.21575e-06	2.37797e-06	2.50565e-06
1342.43	8.592	3.29119e-06	3.26963e-06	3.27971e-06	3.31243e-06	3.27205e-06	3.27255e-06	3.26597e-06	3.27806e-06	3.2326e-06	3.24915e-06	3.20536e-06	3.22457e-06	3.1674e-06	3.2247e-06	3.26752e-06	3.32894e-06	3.52176e-06
1349.88	8.593	6.11475e-07	5.66801e-07	5.13547e-07	5.38175e-07	5.8747e-07	5.55965e-07	5.25283e-07	5.03115e-07	5.89891e-07	5.25273e-07	5.02165e-07	5.6254e-07	5.5535e-07	5.42575e-07	6.42926e-07	5.48331e-07	5.96982e-07
1357.34	8.594	8.38017e-08	7.53947e-08	7.25075e-08	7.24306e-08	6.49161e-08	8.11563e-08	1.2986e-07	5.73211e-08	6.19123e-08	1.22918e-07	7.63677e-08	7.95417e-08	5.65761e-08	7.79556e-08	6.99442e-08	9.32201e-08	7.05077e-08
1364.79	8.596	1.88455e-07	2.44344e-07	2.33908e-07	2.39588e-07	2.36691e-07	2.491e-07	2.25367e-07	2.48209e-07	2.34557e-07	2.46864e-07	2.44424e-07	2.4985e-07	2.48122e-07	2.47488e-07	2.34889e-07	2.3835e-07	2.53404e-07
1372.24	8.597	6.39857e-07	7.95931e-07	7.54801e-07	7.70011e-07	8.30818e-07	7.96647e-07	7.72728e-07	7.954e-07	7.74001e-07	7.33657e-07	8.17208e-07	7.58047e-07	8.53484e-07	8.11742e-07	8.12526e-07	8.98112e-07	9.38306e-07
1379.69	8.599	2.06661e-07	1.80597e-07	2.62056e-07	2.61503e-07	2.11517e-07	2.07595e-07	2.87469e-07	2.09502e-07	1.99511e-07	1.94351e-07	2.79062e-07	2.58915e-07	2.41709e-07	1.93694e-07	2.47626e-07	2.49877e-07	2.59503e-07
1387.14	8.6	3.59653e-08	7.16267e-09	1.89532e-08	3.1062e-08	1.75875e-08	1.98956e-08	5.92331e-08	1.11012e-08	1.91031e-08	1.52494e-08	1.99855e-08	4.67576e-08	2.33242e-08	3.09499e-08	2.23841e-08	2.42298e-08	3.69147e-08
1394.59	8.601	1.17575e-08	-1.19407e-08	-4.18776e-09	-6.436e-09	-4.18649e-09	-8.46458e-09	5.82128e-09	1.09181e-08	1.36803e-09	-4.5563e-09	-6.91366e-09	3.58695e-08	-1.08122e-08	3.58524e-08	2.39451e-10	3.85686e-09	-1.2824e-08
1402.04	8.603	5.50925e-09	2.57887e-09	1.16976e-09	-1.97753e-09	3.81188e-09	3.83236e-09	3.85346e-09	-9.52072e-10	3.9438e-09	2.39509e-09	-1.85253e-09	-2.66663e-10	-8.02489e-09	1.20016e-09	-5.78299e-10	8.29788e-09	-8.66277e-09
1409.49	8.604	0	3.08863e-09	1.06364e-09	1.48935e-09	-3.93398e-09	-3.64073e-10	6.86783e-09	-5.19703e-09	-1.15142e-24	-8.49886e-09	-6.02722e-09	6.55144e-10	0	9.04749e-10	-2.29385e-09	-5.51373e-09	5.76937e-09
1416.94	8.606	2.22762e-24	-3.27602e-09	2.54232e-08	1.643e-09	4.86435e-09	-7.47847e-10	-3.74924e-09	1.47315e-10	-4.74065e-09	-2.33341e-08	3.1211e-08	-1.5651e-09	-2.37536e-09	1.23655e-09	-3.48709e-09	-7.73597e-09	1.1184e-09
1424.39	8.607	3.21792e-08	3.48889e-08	2.72125e-08	2.07317e-08	1.29279e-08	2.32162e-08	1.45822e-08	2.87758e-08	1.91696e-08	6.74914e-08	6.95753e-08	6.05015e-08	5.29983e-08	3.38892e-08	4.66784e-08	3.02298e-08	3.93762e-08
1431.84	8.608	0.000208964	0.000204908	0.000204373	0.000203865	0.000203331	0.000202828	0.000202274	0.000201103	0.000199983	0.000198786	0.000196313	0.00019366	0.000190342	0.000184772	0.000173931	0.000160742	0.000146801
1439.29	8.61	0.000256115	0.000228114	0.000227026	0.000225971	0.00022491	0.000223777	0.000222697	0.000220522	0.000218363	0.00021611	0.000211752	0.000207361	0.000202237	0.000194365	0.000180487	0.000165083	0.000150185
1446.74	8.611	6.43997e-05	5.5169e-05	5.49798e-05	5.47703e-05	5.46169e-05	5.43612e-05	5.41587e-05	5.37725e-05	5.34254e-05	5.30173e-05	5.24961e-05	5.20289e-05	5.11465e-05	4.98824e-05	4.82854e-05	4.66387e-05	4.59737e-05
1454.19	8.613	3.63655e-06	3.84912e-06	3.81732e-06	3.87879e-06	3.87956e-06	3.84242e-06	3.86449e-06	3.87888e-06	3.89756e-06	3.90502e-06	3.93029e-06	4.04885e-06	4.16261e-06	4.25198e-06	4.5428e-06	5.00415e-06	5.36483e-06
1461.64	8.614	3.21626e-07	2.39218e-07	2.8667e-07	2.81741e-07	2.41546e-07	2.44064e-07	2.47976e-07	2.51364e-07	2.56656e-07	2.48485e-07	2.49482e-07	2.46416e-07	2.33271e-07	2.53486e-07	1.61987e-07	3.20892e-07	2.68665e-07
1469.08	8.615	6.06744e-06	5.81196e-06	5.80492e-06	5.83417e-06	5.81056e-06	5.81292e-06	5.82606e-06	5.80724e-06	5.82007e-06	5.8344e-06	5.85988e-06	5.86812e-06	5.89378e-06	5.86902e-06	6.00028e-06	6.09698e-06	6.28884e-06
1476.53	8.617	1.0903e-05	1.15012e-05	1.14596e-05	1.14739e-05	1.14674e-05	1.14875e-05	1.14705e-05	1.14895e-05	1.15622e-05	1.15886e-05	1.16463e-05	1.17645e-05	1.1914e-05	1.23622e-05	1.32889e-05	1.38498e-05	1.49855e-05
1483.98	8.618	3.29081e-06	3.3716e-06	3.37322e-06	3.38931e-06	3.36896e-06	3.36851e-06	3.38257e-06	3.38092e-06	3.41122e-06	3.39319e-06	3.42933e-06	3.48335e-06	3.48035e-06	3.47278e-06	3.6996e-06	3.96827e-06	4.14776e-06
1491.43	8.62	1.61561e-06	1.40989e-06	1.38685e-06	1.38771e-06	1.3353e-06	1.26483e-06	1.26918e-06	1.27965e-06	1.11088e-06	1.09898e-06	9.76154e-07	9.27644e-07	8.88488e-07	7.92786e-07	5.03241e-07	2.95959e-07	-7.4102e-08
1498.87	8.621	2.92866e-06	2.71547e-06	2.74424e-06	2.73263e-06	2.67462e-06	2.66335e-06	2.6548e-06	2.62972e-06	2.50515e-06	2.46971e-06	2.37058e-06	2.2396e-06	2.13612e-06	2.09705e-06	2.31192e-06	1.79527e-06	1.60495e-06
1506.32	8.622	6.4439e-08	8.90612e-08	5.31432e-08	7.89095e-08	8.97582e-08	8.12743e-08	9.4611e-08	7.18737e-08	5.87295e-08	1.15223e-07	6.53196e-08	1.06244e-07	8.72447e-08	6.85532e-08	1.06893e-07	8.75989e-08	4.97749e-08
1513.76	8.624	9.62208e-09	1.02157e-08	1.70038e-08	2.07776e-08	8.66063e-09	2.33002e-08	6.84322e-09	-2.05116e-09	1.08065e-08	2.62274e-08	2.12093e-08	1.53944e-08	2.13898e-08	1.54367e-08	3.23809e-08	3.40144e-08	4.70465e-08
1521.21	8.625	6.12544e-07	5.0314e-07	5.1844e-07	4.8024e-07	4.93156e-07	4.79747e-07	4.642e-07	4.55872e-07	4.19537e-07	4.4388e-07	4.61205e-07	4.99019e-07	4.18984e-07	3.45568e-07	9.69252e-08	-1.59473e-07	-2.83456e-07
1528.66	8.627	9.35754e-06	8.36802e-06	8.24805e-06	8.17188e-06	8.18032e-06	8.02705e-06	7.86625e-06	7.75483e-06	7.43509e-06	7.16949e-06	7.11309e-06	7.0615e-06	6.56285e-06	6.50849e-06	6.17987e-06	2.32431e-06	2.47012e-06
1536.1	8.628	3.93918e-05	3.78187e-05	3.76383e-05	3.74566e-05	3.7284e-05	3.71334e-05	3.69881e-05	3.67349e-05	3.65562e-05	3.64415e-05	3.6389e-05	3.67114e-05	3.54645e-05	3.40952e-05	3.33992e-05	2.75078e-05	3.01211e-05
1543.55	8.629	2.24299e-05	2.13861e-05	2.13137e-05	2.12002e-05	2.10698e-05	2.09986e-05	2.09251e-05	2.07652e-05	2.06139e-05	2.05589e-05	2.03874e-05	2.04201e-05	1.98006e-05	1.9097e-05	1.95481e-05	1.57837e-05	1.63918e-05
1550.99	8.631	3.90562e-07	4.0054e-07	4.01281e-07	3.851e-07	4.07896e-07	4.03413e-07	3.77924e-07	3.52377e-07	3.66376e-07	3.9109e-07	3.82559e-07	3.98868e-07	3.7515e-07	2.76808e-07	3.90397e-07	1.97115e-07	4.13233e-07
1558.43	8.632	3.30082e-07	3.15628e-07	3.44527e-07	3.22527e-07	3.285e-07	3.0911e-07	3.00389e-07	3.06812e-07	3.21772e-07	2.89217e-07	3.26453e-07	3.0045e-07	2.60455e-07	2.8833e-07	3.06378e-07	1.54177e-07	4.68626e-07
1565.88	8.634	2.6637e-05	2.48625e-05	2.46167e-05	2.44397e-05	2.42705e-05	2.40313e-05	2.38563e-05	2.35511e-05	2.34681e-05	2.34238e-05	2.33981e-05	2.33593e-05	2.25072e-05	2.11143e-05	2.0432e-05	1.77669e-05	2.17567e-05
1573.32	8.635	0.00021967	0.000252929	0.000251554	0.000250415	0.000249267	0.000247925	0.000247005	0.000244648	0.000242848	0.00024124	0.000238708	0.000237014	0.000230972	0.000223028	0.000211798	0.000185242	0.000174743
1580.76	8.636	0.00014083	0.000161962	0.000161132	0.00016029	0.000159515	0.000158869	0.00015811	0.000156717	0.000155534	0.000154399	0.000152337	0.000150938	0.000147221	0.000141839	0.000134823	0.000117036	0.000110882
1588.2	8.638	9.65343e-06	8.81083e-06	8.73289e-06	8.62633e-06	8.56545e-06	8.49427e-06	8.42705e-06	8.29203e-06	8.21722e-06	8.18006e-06	8.08914e-06	8.04636e-06	7.65265e-06	7.1116e-06	7.33246e-06	5.31834e-06	5.74818e-06
1595.65	8.639	2.12801e-05	2.01592e-05	2.00385e-05	2.00461e-05	1.99657e-05	1.98427e-05	1.97586e-05	1.97188e-05	1.96676e-05	1.96268e-05	1.97932e-05	2.02857e-05	1.9482e-05	1.84169e-05	1.67683e-05	1.1528e-05	1.25253e-05
1603.09	8.641	0.00020187	0.000239835	0.000238673	0.00023745	0.000236405	0.000235228	0.000234309	0.000232227	0.000230477	0.000229002	0.000226204	0.000224406	0.000218408	0.000209228	0.000197945	0.00016902	0.000157895
1610.53	8.642	0.000160488	0.000188067	0.00018724	0.000186145	0.000185229	0.000184582	0.000183548	0.000182099	0.000180562	0.000179839	0.000177511	0.00017609	0.000171268	0.000163444	0.000155379	0.000132102	0.000126439
1617.97	8.643	3.10741e-05	2.89947e-05	2.86165e-05	2.84638e-05	2.82125e-05	2.80678e-05	2.77326e-05	2.74432e-05	2.71444e-05	2.68072e-05	2.61879e-05	2.59643e-05	2.50738e-05	2.45754e-05	2.73566e-05	2.03579e-05	2.06862e-05
1625.41	8.645	3.89229e-06	3.18612e-06	3.14971e-06	2.9411e-06	2.71223e-06	2.75451e-06	2.31722e-06	2.19492e-06	1.6852e-06	1.78692e-06	1.89151e-06	1.87228e-06	1.60753e-06	1.30346e-06	7.08494e-08	-1.20434e-06	-1.53982e-06
1632.85	8.646	4.14178e-06	4.11876e-06	4.15018e-06	4.08306e-06	4.09712e-06	4.06149e-06	4.01828e-06	3.87192e-06	3.81243e-06	3.75179e-06	3.60292e-06	3.43139e-06	3.1301e-06	2.19997e-06	1.06463e-06	-1.49921e-06	-2.05154e-06
1640.29	8.648	3.12055e-05	2.95566e-05	2.9348e-05	2.91549e-05	2.90071e-05	2.88462e-05	2.86635e-05	2.84556e-05	2.83338e-05	2.81832e-05	2.80921e-05	2.84464e-05	2.76271e-05	2.66542e-05	2.63794e-05	2.01271e-05	2.33217e-05
1647.73	8.649	3.03664e-05	2.96367e-05	2.95143e-05	2.93789e-05	2.92986e-05	2.91797e-05	2.90834e-05	2.8972e-05	2.8891e-05	2.8909e-05	2.90801e-05	2.96e-05	2.85361e-05	2.72664e-05	2.67004e-05	2.25216e-05	2.74906e-05
1655.17	8.65	1.01951e-05	9.33243e-06	9.25153e-06	9.18742e-06	9.12432e-06	9.08349e-06	9.20172e-06	9.12851e-06	9.13233e-06	9.09111e-06	9.25061e-06	9.52109e-06	9.20992e-06	8.49783e-06	9.46144e-06	8.75289e-06	1.15004e-05
1662.61	8.652	2.66723e-06	2.49845e-06	2.37644e-06	2.35656e-06	2.22244e-06	2.19991e-06	2.25882e-06	2.00102e-06	2.03677e-06	2.04939e-06	2.10137e-06	2.17978e-06	2.02305e-06	1.53813e-06	8.63168e-07	-3.7175e-07	-5.03547e-07
1670.05	8.653	1.23199e-06	1.11652e-06	1.13314e-06	1.09901e-06	1.11459e-06	1.09088e-06	1.07284e-06	1.10226e-06	1.08708e-06	1.04515e-06	1.04913e-06	1.08928e-06	1.03087e-06	1.05741e-06	1.03877e-06	7.89378e-07	1.05348e-06
1677.48	8.655	3.44885e-07	3.0043e-07	2.99375e-07	3.04217e-07	2.8845e-07	3.00327e-07	3.30005e-07	2.74854e-07	2.7818e-07	2.81278e-07	2.93183e-07	2.99167e-07	3.33326e-07	3.07871e-07	2.94307e-07	1.7054e-07	2.34342e-07
1684.92	8.656	1.55371e-07	1.37431e-07	1.30681e-07	1.17256e-07	1.31917e-07	1.10391e-07	1.44105e-07	1.3833e-07	1.22029e-07	1.54846e-07	1.47102e-07	1.3099e-07	4.6305e-08	1.67133e-07	1.49323e-07	1.0421e-07	1.37601e-07
1692.36	8.657	2.94782e-08	1.67918e-08	1.28308e-08	2.29935e-08	3.16634e-08	2.22539e-08	4.16737e-08	4.41713e-08	3.37371e-08	2.19916e-08	8.06471e-08	2.02911e-08	1.25349e-08	2.06083e-08	2.4585e-08	2.4442e-08	3.62905e-08
1699.8	8.659	5.76727e-09	3.02576e-09	-2.74379e-09	8.68514e-09	3.41505e-10	2.41458e-08	1.57478e-08	9.15568e-09	2.05624e-08	2.62952e-08	3.30441e-08	8.19638e-09	4.5415e-24	7.95948e-09	-1.34468e-08	4.55557e-09	-1.50927e-08
1707.23	8.66	2.64962e-08	2.83815e-08	4.32016e-08	4.07267e-08	1.03878e-08	6.26759e-08	2.01739e-08	4.89433e-08	2.92381e-08	4.42868e-09	2.97033e-08	3.64738e-08	5.94808e-08	2.92537e-08	3.2837e-08	1.90984e-08	3.00894e-08
1714.67	8.662	8.16437e-09	7.31313e-09	3.78068e-09	1.14691e-08	3.32373e-09	1.12786e-08	1.14459e-08	2.54802e-08	7.54842e-09	6.27204e-09	0	1.59803e-08	2.49062e-08	1.62216e-08	0	-4.9344e-09	-3.9818e-09
1722.1	8.663	1.62958e-08	3.38701e-08	4.84153e-09	2.14489e-08	2.44718e-08	1.37532e-08	0	0	3.28875e-08	1.87354e-08	7.8017e-09	9.60647e-09	9.141e-09	1.47027e-08	4.91572e-08	8.43496e-09	-1.30279e-08
1729.54	8.664	0	-7.71906e-25	0	0	1.00053e-08	1.30442e-08	0	0	0	1.61556e-08	0	0	8.226e-09	-1.30674e-09	1.2172e-08	5.86439e-09	1.31863e-08
1736.97	8.666	0	0	0	5.43528e-09	0	0	0	0	0	-1.1446e-08	0	7.44019e-09	0	2.2657e-09	0	3.22297e-09	6.33972e-09
1744.41	8.667	0	0	6.79815e-09	0	8.02191e-09	0	0	-1.73738e-08	0	-1.14639e-08	4.81371e-09	0	0	0	0	-2.3676e-08	5.35103e-09
1751.84	8.669	1.54034e-07	1.55696e-07	1.56303e-07	1.4111e-07	1.58809e-07	1.36358e-07	1.56195e-07	1.6046e-07	1.4582e-07	1.29693e-07	1.79531e-07	1.59831e-07	8.82252e-08	1.84558e-07	1.21136e-07	1.59205e-07	2.43426e-07
1759.27	8.67	2.35391e-07	2.52679e-07	2.39417e-07	1.79632e-07	2.17953e-07	2.58255e-07	2.45735e-07	1.6006e-07	2.35566e-07	2.09452e-07	2.42099e-07	2.32269e-07	2.23631e-07	2.76024e-07	2.80098e-07	2.31739e-07	2.83405e-07
1766.71	8.671	1.50002e-07	1.24532e-07	1.27726e-07	9.91839e-08	1.09511e-07	1.21972e-07	8.36113e-08	1.26819e-07	9.14957e-08	9.2617e-08	1.44692e-07	8.33658e-08	1.16813e-07	8.57832e-08	1.26719e-07	1.19313e-07	1.26039e-07
1774.14	8.673	2.45365e-08	4.31624e-08	4.48755e-08	1.39854e-08	5.51846e-08	2.06096e-08	1.89539e-08	2.36507e-08	0	8.42418e-09	1.18782e-08	4.69567e-08	1.27835e-08	2.32818e-08	2.05043e-09	3.28043e-08	2.316e-08
1781.57	8.674	9.49551e-09	3.55435e-08	2.03518e-08	-8.64566e-10	1.25588e-08	3.66868e-08	2.76192e-08	4.73515e-08	1.48914e-08	5.3543e-08	1.90276e-08	8.49433e-09	5.1964e-09	1.14763e-08	1.83795e-08	2.2965e-08	2.27244e-08
1789.01	8.676	2.50241e-07	2.90616e-07	2.75263e-07	2.75249e-07	2.10967e-07	2.70083e-07	3.10334e-07	2.49881e-07	1.9065e-07	2.15629e-07	2.64763e-07	2.22643e-07	2.06138e-07	1.7953e-07	2.2073e-07	3.06797e-07	3.61936e-07
1796.44	8.677	1.00056e-07	1.37751e-07	1.62253e-07	1.97827e-07	9.13558e-08	1.39741e-07	1.22294e-07	1.62108e-07	1.34845e-07	1.14654e-07	1.07412e-07	1.46589e-07	1.56255e-07	1.84984e-07	2.01136e-07	2.41391e-07	2.87254e-07
1803.87	8.678	6.99498e-08	5.83882e-08	5.33824e-08	4.36729e-08	6.65892e-08	1.36431e-08	4.30752e-09	1.87706e-08	2.81259e-08	1.31388e-08	1.65024e-08	5.79056e-08	1.41338e-08	6.19731e-08	4.89451e-08	2.627e-08	4.79689e-08
1811.3	8.68	3.26507e-11	1.99073e-11	1.22019e-09	3.48173e-09	7.43009e-09	1.834e-08	6.64405e-09	9.17933e-09	2.2173e-10	-9.79215e-10	3.43182e-09	7.05648e-09	2.33596e-08	1.85351e-08	2.5247e-08	1.49295e-08	7.89961e-09
1818.73	8.681	-4.58359e-09	-4.54182e-08	-4.61033e-08	-3.7104e-08	-2.62848e-08	-4.53626e-08	-4.07945e-08	-5.32111e-08	-5.92698e-08	-4.45486e-08	-4.42561e-08	-4.92605e-08	-6.74574e-08	-6.34376e-08	-8.2059e-08	-1.3797e-07	-6.69055e-08
1826.16	8.683	1.78408e-09	1.68377e-08	2.03202e-08	5.79516e-08	3.00185e-08	4.08823e-09	5.69579e-08	1.96896e-08	1.80236e-08	1.8405e-08	2.94741e-08	2.25399e-08	1.72876e-08	2.12519e-08	2.75997e-08	2.30645e-09	4.11298e-08
1833.59	8.684	6.05227e-08	1.24217e-07	1.29414e-07	1.24519e-07	1.24684e-07	1.24859e-07	1.25044e-07	1.25449e-07	1.10124e-07	1.26412e-07	1.30912e-07	1.04072e-07	1.34368e-07	1.3819e-07	1.14196e-07	1.26125e-07	1.15895e-07
1841.02	8.685	-5.61677e-09	-1.04511e-08	-1.04612e-08	-1.04718e-08	-5.97006e-08	-1.04949e-08	-1.05073e-08	-1.05342e-08	-1.0564e-08	-1.46431e-08	-6.48629e-08	-1.48797e-08	-1.08862e-08	-1.11184e-08	-1.17092e-08	-1.26651e-08	-1.35888e-08
1848.45	8.687	-1.62392e-08	-4.26741e-08	-4.27543e-08	-4.28385e-08	-4.29274e-08	-4.59296e-08	-4.60343e-08	-4.50043e-08	-4.52465e-08	-4.55128e-08	-4.61277e-08	-4.68675e-08	-4.59916e-08	-8.91876e-08	-5.17148e-08	-5.78355e-08	-6.36078e-08
1855.88	8.688	-4.80476e-08	-8.18845e-08	-8.32065e-08	-8.32823e-08	-8.33636e-08	-6.27227e-08	-8.3542e-08	-8.37434e-08	-8.47526e-08	-8.42275e-08	-8.4843e-08	-8.56189e-08	-8.66168e-08	-8.86238e-08	-9.3848e-08	-1.02394e-07	-1.10642e-07
1863.31	8.69	9.28469e-08	7.30458e-08	7.59471e-08	7.849e-08	6.05653e-08	8.72007e-08	7.07695e-08	1.20797e-07	9.70414e-08	1.07379e-07	8.8674e-08	7.60544e-08	6.86975e-08	1.00935e-07	8.16033e-08	9.82315e-08	9.91032e-08
1870.73	8.691	1.2252e-05	1.30805e-05	1.30846e-05	1.30839e-05	1.30798e-05	1.31292e-05	1.31773e-05	1.30918e-05	1.31506e-05	1.31523e-05	1.31709e-05	1.32412e-05	1.32536e-05	1.32669e-05	1.33462e-05	1.36781e-05	1.40057e-05
1878.16	8.692	5.32376e-05	3.9905e-05	3.97874e-05	3.97673e-05	3.9703e-05	3.95896e-05	3.94862e-05	3.93372e-05	3.92595e-05	3.9022e-05	3.8713e-05	3.83644e-05	3.79956e-05	3.74067e-05	3.6197e-05	3.51324e-05	3.42787e-05
1885.59	8.694	3.57057e-05	2.94874e-05	2.94552e-05	2.94315e-05	2.93474e-05	2.92739e-05	2.9235e-05	2.91723e-05	2.90902e-05	2.89112e-05	2.86876e-05	2.84358e-05	2.82302e-05	2.77674e-05	2.68416e-05	2.59068e-05	2.51289e-05
1893.01	8.695	6.46143e-06	1.11296e-05	1.12352e-05	1.12269e-05	1.12534e-05	1.13193e-05	1.1308e-05	1.13807e-05	1.15024e-05	1.15819e-05	1.17659e-05	1.19761e-05	1.22987e-05	1.27856e-05	1.38583e-05	1.57147e-05	1.73633e-05
1900.44	8.697	2.72759e-06	4.04193e-06	4.07474e-06	4.07313e-06	4.07446e-06	4.07332e-06	4.08132e-06	4.16025e-06	4.08462e-06	4.16447e-06	4.21049e-06	4.17403e-06	4.3267e-06	4.37037e-06	4.67427e-06	4.98626e-06	5.37082e-06
1907.86	8.698	2.07621e-06	4.1289e-06	4.08985e-06	4.20174e-06	4.19706e-06	4.24892e-06	4.23269e-06	4.2231e-06	4.16507e-06	4.21839e-06	4.30175e-06	4.33067e-06	4.41687e-06	4.61159e-06	5.0376e-06	5.58837e-06	6.06362e-06
1915.29	8.699	5.67957e-07	7.10959e-07	7.29513e-07	7.06656e-07	7.29026e-07	6.63027e-07	7.64048e-07	7.07317e-07	7.0228e-07	6.96274e-07	7.37034e-07	7.96727e-07	7.65883e-07	7.65632e-07	7.40091e-07	1.05527e-06	9.72569e-07
1922.71	8.701	5.43265e-07	6.1904e-07	6.08867e-07	6.4757e-07	5.9558e-07	6.34941e-07	6.5655e-07	6.44435e-07	6.17606e-07	6.23508e-07	6.31913e-07	7.04243e-07	6.77783e-07	6.73154e-07	7.45488e-07	8.57116e-07	9.33999e-07
1930.14	8.702	7.33161e-07	9.36502e-07	6.95512e-07	8.05867e-07	7.86825e-07	7.40792e-07	8.49303e-07	8.28197e-07	8.57812e-07	8.40422e-07	8.53165e-07	8.41371e-07	8.72666e-07	8.47994e-07	1.09095e-06	1.06095e-06	1.26528e-06
1937.56	8.704	2.22795e-05	1.8183e-05	1.80966e-05	1.80717e-05	1.80398e-05	1.79852e-05	1.79247e-05	1.78422e-05	1.77743e-05	1.78254e-05	1.76899e-05	1.76577e-05	1.75682e-05	1.75143e-05	1.74529e-05	1.78146e-05	1.8516e-05
1944.98	8.705	0.000398969	0.00033571	0.000334162	0.000332331	0.000330801	0.00032896	0.000327428	0.000324054	0.000320618	0.000317261	0.000310383	0.000303709	0.000295562	0.00028305	0.000260802	0.000235885	0.000210832
1952.41	8.706	0.00116816	0.00100928	0.00100391	0.000998563	0.000993154	0.000987725	0.000982121	0.000970886	0.000959603	0.000948064	0.000924381	0.000900139	0.000875078	0.00083436	0.000755357	0.000676001	0.000592036
1959.83	8.708	0.00113461	0.000994445	0.000990203	0.000985951	0.000981666	0.000977442	0.000973085	0.000964401	0.000955675	0.000946742	0.000928522	0.000909965	0.000888744	0.000854477	0.000787584	0.000715333	0.000639136
1967.25	8.709	0.00100477	0.000911811	0.000907682	0.000903577	0.000899596	0.000895553	0.000891506	0.000883392	0.000875427	0.000867573	0.000851629	0.000835411	0.000818382	0.000792326	0.000745102	0.000697086	0.000645773
1974.67	8.711	0.000302754	0.000317408	0.000315973	0.000314497	0.000313053	0.000311687	0.00031003	0.000307319	0.000304545	0.000301612	0.000295976	0.000290395	0.000282772	0.000270261	0.000245546	0.000214149	0.000182237
1982.09	8.712	6.97542e-05	6.55833e-05	6.5175e-05	6.47891e-05	6.48123e-05	6.42113e-05	6.41433e-05	6.33166e-05	6.30993e-05	6.28944e-05	6.21334e-05	6.22473e-05	6.11498e-05	5.91558e-05	5.7883e-05	4.91227e-05	5.07481e-05
1989.52	8.714	4.47662e-05	4.36063e-05	4.36524e-05	4.34076e-05	4.34783e-05	4.34418e-05	4.35118e-05	4.36971e-05	4.39526e-05	4.43652e-05	4.55513e-05	4.71412e-05	4.63488e-05	4.58391e-05	4.74515e-05	4.55428e-05	5.51329e-05
1996.94	8.715	0.000584342	0.000554769	0.000553284	0.000551476	0.000550059	0.000548523	0.000546955	0.000543928	0.000540876	0.000537711	0.00053151	0.00052513	0.000518005	0.000506839	0.000481976	0.000455004	0.000426753
2004.35	8.716	0.0036207	0.00275442	0.00273813	0.00272158	0.00270491	0.00268814	0.0026711	0.00263672	0.00260169	0.00256581	0.00249193	0.00241445	0.00233781	0.00221306	0.00196808	0.00172836	0.00150142
2011.77	8.718	0.00280133	0.00236921	0.00235742	0.00234546	0.00233313	0.00232107	0.00230865	0.00228343	0.00225757	0.00223103	0.00217554	0.00211607	0.00206105	0.00196986	0.00178108	0.0016069	0.00140834
2019.19	8.719	0.00170361	0.00149264	0.00148609	0.00147941	0.00147261	0.00146587	0.00145912	0.0014453	0.00143146	0.00141713	0.00138766	0.00135687	0.00132724	0.00127819	0.00117864	0.00108578	0.000972306
2026.61	8.721	0.000598064	0.000591232	0.000588081	0.000585144	0.000582293	0.000579394	0.000576482	0.000570607	0.000565019	0.000559239	0.000547718	0.000535818	0.000523296	0.000504044	0.000465033	0.000417822	0.000370368
2034.03	8.722	0.000289341	0.000273853	0.000272074	0.000270464	0.000268898	0.000267418	0.000266003	0.000263398	0.000261076	0.000259064	0.000256274	0.000255152	0.000247676	0.000238986	0.000232307	0.000195087	0.000208299
2041.45	8.723	0.000313481	0.000325908	0.0003248	0.000322971	0.000321994	0.000320439	0.000319378	0.000316791	0.000315004	0.000313085	0.000310853	0.000311458	0.000305371	0.00029621	0.000283345	0.000244526	0.000242621
2048.86	8.725	0.000648426	0.00068131	0.000678359	0.000674884	0.000672014	0.00066903	0.000665947	0.000659365	0.000652411	0.00064547	0.000631596	0.000616553	0.000602494	0.00057926	0.00053059	0.000476489	0.000423126
2056.28	8.726	0.000996732	0.000958581	0.000954501	0.000950252	0.00094609	0.000942433	0.000938088	0.000929604	0.000921504	0.000912543	0.000894931	0.000875738	0.000859025	0.00083249	0.000778346	0.000731003	0.000677477
2063.7	8.727	0.000789886	0.000779237	0.000775698	0.000772251	0.000768568	0.000764868	0.000761429	0.000753911	0.000746595	0.000738858	0.000723446	0.000706997	0.000692313	0.00066736	0.000618167	0.000569374	0.000516895
2071.11	8.729	0.000714971	0.000717991	0.000714435	0.000710637	0.000706951	0.00070367	0.000700075	0.000692907	0.000685489	0.000678114	0.000662684	0.000646596	0.00063211	0.000608916	0.00056035	0.000506193	0.000451489
2078.53	8.73	0.000390752	0.000398696	0.000396657	0.000394727	0.000392696	0.000390867	0.000388937	0.000385773	0.000382804	0.000379779	0.000374694	0.00037123	0.000362216	0.000348348	0.000329399	0.000285125	0.000273758
2085.94	8.732	0.000309446	0.000307538	0.000305889	0.000304041	0.000302246	0.000300565	0.00029912	0.000295961	0.000293595	0.00029104	0.000287478	0.000285669	0.000276751	0.000264342	0.000248733	0.000209242	0.000211444
2093.36	8.733	0.000150452	0.000141308	0.00014016	0.000139177	0.000138186	0.000137332	0.000136391	0.000134737	0.000133288	0.000132148	0.000130846	0.000131017	0.000125843	0.000119829	0.000119023	8.35124e-05	0.000102905
2100.77	8.734	5.9696e-05	5.76496e-05	5.72592e-05	5.71808e-05	5.69089e-05	5.65691e-05	5.63126e-05	5.59476e-05	5.65972e-05	5.67994e-05	5.82021e-05	5.90658e-05	5.7244e-05	5.57749e-05	5.43859e-05	3.4083e-05	5.65554e-05
2108.18	8.736	2.6766e-05	2.45832e-05	2.45549e-05	2.43681e-05	2.43502e-05	2.42648e-05	2.41814e-05	2.42642e-05	2.45862e-05	2.43601e-05	2.53191e-05	2.62556e-05	2.61435e-05	2.56334e-05	1.84961e-05	9.66734e-06	3.20912e-05
2115.59	8.737	2.22177e-05	1.93915e-05	1.93752e-05	1.85837e-05	1.88793e-05	1.79356e-05	1.77363e-05	1.78117e-05	1.71585e-05	1.60424e-05	1.52705e-05	1.53918e-05	1.39196e-05	1.18715e-05	7.56415e-06	-5.96902e-06	-1.6774e-05
2123.01	8.739	4.55421e-06	3.92009e-06	3.74091e-06	3.7106e-06	3.68546e-06	3.48509e-06	3.43355e-06	3.12712e-06	2.89318e-06	2.81217e-06	2.60811e-06	2.54981e-06	2.40282e-06	2.43095e-06	4.30929e-06	2.50934e-06	4.5477e-06
2130.42	8.74	2.40677e-06	2.14097e-06	2.07019e-06	1.87595e-06	1.8167e-06	1.54402e-06	1.56819e-06	1.48341e-06	1.41367e-06	1.44369e-06	1.38919e-06	1.25936e-06	9.75821e-07	5.971e-07	9.80993e-08	-3.13641e-06	-3.00487e-06
2137.83	8.741	1.70568e-06	1.50317e-06	1.47806e-06	1.4417e-06	1.38092e-06	1.37589e-06	1.30655e-06	1.09262e-06	7.54677e-07	6.94396e-07	2.8078e-07	4.78351e-08	-3.50254e-07	-8.80094e-07	-1.98837e-06	-5.64788e-06	-7.12051e-06
2145.24	8.743	9.15961e-06	7.68276e-06	7.92013e-06	7.31305e-06	7.52032e-06	6.94138e-06	7.30735e-06	6.93434e-06	6.65046e-06	6.38625e-06	5.62465e-06	5.69668e-06	5.44946e-06	6.63248e-06	1.27556e-05	1.83331e-05	3.68164e-05
2152.65	8.744	1.49141e-05	1.36499e-05	1.32462e-05	1.31405e-05	1.30726e-05	1.30086e-05	1.24391e-05	1.20532e-05	1.17435e-05	1.14666e-05	1.08809e-05	1.0503e-05	1.10543e-05	1.26031e-05	1.89658e-05	1.19007e-05	1.3739e-05
2160.06	8.746	1.27044e-05	1.08428e-05	1.03836e-05	1.01312e-05	1.02198e-05	1.00306e-05	9.36745e-06	9.09237e-06	8.62272e-06	8.32067e-06	7.67108e-06	7.12525e-06	5.86912e-06	4.06577e-06	9.36157e-07	4.61823e-06	2.13929e-05
2167.47	8.747	9.30996e-06	8.89171e-06	8.81295e-06	8.78073e-06	8.29323e-06	8.22693e-06	8.07536e-06	7.90831e-06	7.63559e-06	7.5952e-06	7.1686e-06	7.41203e-06	6.63745e-06	5.41134e-06	3.11183e-06	4.73445e-07	7.48341e-06
2174.88	8.748	3.29899e-06	2.55157e-06	2.50705e-06	2.76484e-06	2.71508e-06	2.62103e-06	2.54498e-06	2.58829e-06	2.55595e-06	2.50405e-06	1.87892e-06	1.71095e-06	1.12058e-06	-7.9395e-07	-3.36692e-06	-7.97654e-06	-1.24957e-05
2182.28	8.75	6.77859e-07	4.57378e-07	3.81419e-07	5.0897e-07	4.10392e-07	4.19838e-07	3.68077e-07	4.02924e-07	3.55747e-07	3.05458e-07	3.95317e-07	2.33159e-07	2.95094e-07	2.20382e-07	4.58054e-08	-6.39078e-07	-7.00185e-07
2189.69	8.751	9.4749e-07	8.66138e-07	8.5322e-07	8.14516e-07	8.45564e-07	8.52594e-07	8.40556e-07	8.52043e-07	9.28876e-07	8.29804e-07	6.89593e-07	8.2467e-07	8.48649e-07	8.12062e-07	9.23188e-07	4.36432e-07	1.1644e-06
2197.1	8.753	2.86349e-07	3.94053e-07	1.96894e-07	2.73495e-07	2.17561e-07	2.48902e-07	3.13557e-07	1.96241e-07	2.33005e-07	3.37317e-07	2.08672e-07	9.8543e-08	2.54846e-07	2.62215e-07	2.73527e-07	1.7225e-07	3.81681e-07
2204.5	8.754	9.95696e-08	1.02689e-07	1.38791e-07	0	9.06805e-08	3.22791e-08	7.29742e-08	5.81706e-08	5.50891e-08	8.54635e-08	5.75475e-08	4.1705e-08	6.78457e-08	6.59401e-08	7.49216e-08	4.27292e-08	8.96516e-08
2211.91	8.755	3.20235e-07	2.18515e-07	4.09e-07	2.08903e-07	3.7389e-07	3.3656e-07	4.20685e-07	1.54997e-07	3.99968e-07	3.0698e-07	3.0527e-07	4.08823e-07	3.08391e-07	3.04346e-07	3.08434e-07	1.51081e-07	3.72982e-07
2219.31	8.757	1.54027e-07	6.77279e-08	1.36095e-07	1.46395e-07	2.42413e-07	1.43252e-07	1.607e-07	1.85007e-07	1.20961e-07	1.73459e-07	2.08987e-07	9.0301e-08	1.58825e-07	1.44705e-07	1.31556e-07	1.10097e-07	1.17553e-07
2226.72	8.758	2.05666e-07	3.35371e-07	2.98626e-07	1.5296e-07	1.42696e-07	1.33056e-07	1.16468e-07	2.00204e-07	1.18569e-07	1.93378e-07	3.58808e-07	1.48028e-07	1.42536e-07	1.3226e-07	1.68779e-07	-1.01977e-08	2.00181e-07
2234.12	8.76	4.00348e-08	8.69788e-08	4.29965e-08	3.60889e-08	1.19987e-07	0	5.10635e-08	0	6.33842e-08	4.42328e-08	0	4.78322e-08	5.82514e-08	8.71066e-08	5.70998e-08	6.43946e-08	2.38272e-08
2241.53	8.761	2.64481e-08	0	6.32351e-08	2.5661e-08	3.39818e-08	7.28048e-24	5.54307e-08	4.07396e-08	5.64002e-08	-1.59678e-08	2.86133e-08	1.57431e-08	2.43375e-08	3.62047e-08	-7.25041e-09	-8.64436e-09	3.49332e-08
2248.93	8.763	1.4023e-07	0	1.8739e-08	7.65461e-08	1.68344e-07	1.46071e-07	1.65145e-07	1.47788e-07	1.31448e-07	1.73359e-07	4.98216e-08	1.15586e-07	9.9606e-08	1.14961e-07	1.36051e-07	3.92492e-08	7.13904e-08
2256.33	8.764	1.94036e-07	5.67219e-08	1.63664e-07	2.41098e-07	2.79566e-07	1.25684e-07	1.65172e-07	3.98642e-07	9.03028e-08	9.16851e-08	1.65637e-07	1.79525e-07	1.66942e-07	1.71043e-07	1.86468e-07	1.45199e-07	6.38431e-08
2263.73	8.765	8.6445e-08	2.58185e-07	1.79623e-07	1.01898e-07	2.89996e-08	8.26841e-08	3.04999e-08	1.85199e-08	1.70917e-07	3.95049e-08	9.13291e-08	6.14744e-08	5.80772e-08	5.23885e-08	5.37486e-08	6.03495e-08	2.91003e-08
2271.14	8.767	9.61094e-08	4.82923e-08	6.661e-08	0	8.65329e-08	0	1.79151e-07	1.71352e-08	7.66495e-08	1.06057e-08	2.73313e-08	3.12725e-08	4.77481e-08	5.60053e-08	6.20843e-08	6.01709e-08	-1.54878e-08
2278.54	8.768	1.02344e-07	1.26654e-07	2.91878e-08	5.33258e-08	1.74983e-07	7.46159e-08	4.86155e-08	0	9.12767e-08	1.2412e-08	2.87493e-08	5.26172e-08	5.72012e-08	9.29316e-08	7.99872e-08	7.04161e-08	4.06788e-08
2285.94	8.77	2.05754e-08	-6.97761e-09	0	0	0	5.22724e-08	8.40801e-09	4.89096e-09	5.47356e-08	-2.92418e-08	1.12822e-08	2.96851e-08	2.15533e-08	1.05626e-08	8.63363e-09	7.99267e-09	-7.01659e-08
2293.34	8.771	1.4193e-08	0	0	0	0	0	0	0	5.77198e-09	9.04792e-25	1.76154e-08	1.55317e-08	1.14367e-08	2.16974e-08	1.58871e-08	-2.36905e-08	8.04041e-08
2300.74	8.772	4.10398e-24	-6.63868e-09	0	0	0	0	0	-2.23212e-24	3.03241e-09	-6.2732e-08	8.64728e-10	0	5.13427e-09	3.1416e-08	1.76442e-08	-1.78971e-08	4.64906e-08
2308.14	8.774	1.41515e-08	0	-1.29358e-08	4.40764e-08	3.8778e-08	0	3.63787e-09	-2.49628e-08	8.65337e-08	0	-6.29162e-09	5.79313e-09	4.0718e-10	-3.97219e-09	2.6796e-08	-1.44717e-09	2.37194e-08
2315.53	8.775	0	0	0	6.3161e-08	0	6.55889e-08	2.23385e-08	7.51904e-09	7.70258e-09	0	1.5378e-09	2.24282e-08	5.00092e-09	0	-1.53303e-08	9.83323e-09	-1.70389e-08
2322.93	8.777	0	0	0	0	0	0	0	9.37972e-09	5.98488e-09	1.172e-08	0	-2.56527e-09	-1.52332e-08	-4.35469e-09	0	1.35636e-08	8.74527e-08
2330.33	8.778	0	-1.43061e-23	0	0	0	0	0	0	-3.85592e-09	0	4.70036e-09	0	4.44942e-09	-3.14816e-09	7.01223e-24	-4.74336e-08	0
2337.73	8.779	0	0	0	0	0	-6.59014e-08	0	0	6.69758e-09	0	-6.04591e-09	2.30323e-08	4.17606e-09	0	-4.00125e-08	0	8.82544e-08
2345.12	8.781	0	0	0	0	-4.77951e-09	0	0	0	0	2.34443e-08	0	-1.74729e-09	4.72282e-09	0	0	0	0
2352.52	8.782	0	0	-7.62414e-09	0	0	0	0	0	-3.98683e-09	6.61275e-09	1.62472e-08	0	2.25552e-08	2.75817e-09	0	0	-4.68586e-08
2359.91	8.783	0	-1.09106e-07	0	0	-1.16953e-09	0	0	-9.52952e-08	0	0	-3.93602e-24	1.73618e-08	-6.22266e-09	3.29057e-09	0	-2.69267e-08	1.74211e-08
2367.31	8.785	0	-5.05691e-25	0	0	-2.12414e-10	1.08668e-08	0	1.09714e-08	0	6.22189e-09	1.50524e-08	1.57738e-08	8.55171e-09	4.87937e-09	4.51529e-24	8.75205e-10	0
2374.7	8.786	0	8.16351e-08	0	0	-4.03945e-09	0	0	0	0	6.70092e-09	-3.61908e-09	0	0	6.05521e-09	0	-2.29082e-08	-3.43513e-09
2382.09	8.788	0	0	0	-9.34724e-09	3.94048e-09	0	0	-2.79499e-10	-8.28445e-09	0	2.82816e-09	1.01866e-08	0	8.45532e-09	0	-1.69176e-08	-5.69291e-09
2389.49	8.789	0	-6.23871e-09	2.20498e-08	8.54398e-26	0	0	0	0	-2.33845e-09	8.98941e-09	-2.81885e-09	1.5727e-08	9.2677e-09	-1.3741e-09	-6.44759e-08	0	-1.18499e-08
2396.88	8.79	0	0	1.78918e-08	0	0	0	1.07586e-08	-6.26769e-09	3.34567e-09	2.32249e-09	-1.74056e-09	0	2.13455e-08	6.11805e-09	3.37205e-08	4.65718e-08	1.44669e-07
2404.27	8.792	2.89108e-08	9.01656e-09	0	1.15742e-08	0	0	1.97053e-24	1.47999e-08	0	1.20511e-09	-1.25352e-08	-4.8085e-09	1.02788e-08	6.96611e-24	-5.00641e-09	1.58419e-23	2.81829e-08
2411.66	8.793	0	0	0	3.06677e-09	2.69265e-09	0	2.51024e-24	5.39274e-08	0	5.67631e-09	1.25324e-08	7.83111e-09	1.53705e-08	0	2.52384e-08	0	1.75694e-08
2419.05	8.795	0	0	1.02289e-07	0	3.72497e-09	5.09144e-24	5.03392e-09	0	0	-6.40247e-25	-1.1551e-08	-1.54396e-08	2.6362e-08	0	-1.00828e-08	3.54715e-09	2.13787e-08
2426.44	8.796	0	0	0	0	0	1.06528e-08	9.41636e-09	0	1.70763e-08	2.98487e-09	0	4.2285e-09	3.26861e-08	-3.32785e-09	2.09536e-08	-3.8129e-08	1.13679e-08
2433.83	8.797	0	0	0	7.173e-09	8.73733e-09	0	0	0	1.90111e-08	3.31819e-09	0	6.46831e-09	0	2.82719e-08	4.90575e-09	4.92858e-08	6.40984e-10
2441.22	8.799	0	0	0	0	0	2.7706e-23	0	0	5.0614e-25	6.35894e-09	-4.1141e-09	2.36176e-09	-1.76456e-09	-2.01404e-24	4.20481e-08	-6.32408e-09	-1.93955e-08
2448.61	8.8	0	4.65698e-09	0	7.38951e-09	0	9.51061e-08	7.48293e-09	8.74397e-09	0	-6.91194e-24	2.17117e-08	2.97179e-09	0	0	5.04446e-08	1.85514e-09	-5.44117e-09
2455.99	8.802	0	5.39205e-09	0	0	3.33596e-09	8.14178e-08	0	5.26606e-08	2.23426e-08	0	1.96757e-08	-3.64672e-24	3.28488e-08	2.30543e-08	2.7991e-08	2.99631e-08	3.24108e-09
2463.38	8.803	0	4.4747e-08	2.64413e-08	0	1.51011e-08	-1.19234e-09	1.99784e-08	3.88255e-09	2.06197e-08	3.78917e-08	6.56663e-09	2.24509e-08	2.67527e-08	1.5101e-08	2.02125e-08	1.01189e-08	8.09834e-08
2470.77	8.804	8.69443e-08	2.53218e-08	2.34963e-08	3.17713e-08	4.79237e-08	4.57764e-08	5.11442e-08	3.39799e-08	3.74877e-08	5.42994e-08	3.88741e-08	4.4175e-08	6.96542e-08	2.39648e-08	1.33588e-07	-5.16021e-08	5.22127e-08
2478.15	8.806	2.00378e-07	1.99432e-07	1.95346e-07	2.08286e-07	2.10081e-07	1.95805e-07	2.13792e-07	1.92693e-07	1.81924e-07	2.07942e-07	1.90342e-07	1.69692e-07	2.00312e-07	1.8052e-07	2.24424e-07	1.99435e-07	2.63029e-07
2485.54	8.807	5.25779e-06	5.94494e-06	5.96002e-06	5.95891e-06	6.00941e-06	6.03614e-06	6.06127e-06	6.14158e-06	6.24554e-06	6.37643e-06	6.53321e-06	6.67168e-06	6.8778e-06	7.16647e-06	8.77393e-06	1.19128e-05	1.62532e-05
2492.92	8.809	2.12421e-06	2.27742e-06	2.26244e-06	2.27153e-06	2.30179e-06	2.27629e-06	2.27095e-06	2.31971e-06	2.3516e-06	2.34491e-06	2.37333e-06	2.36401e-06	2.47569e-06	2.57241e-06	2.91584e-06	3.74212e-06	4.76157e-06

## Sheet: k_PRISMA
Wavelength	FWHM	k_Summer_L	k_Summer_M	k_Summer_H	k_Winter_L	k_Winter_M	k_Winter_H	k_1976_L	k_1976_M	k_1976_H
943.093	11.1634	2.87629e-09	0	-1.96008e-10	-4.27296e-09	6.52086e-10	-2.04187e-10	0	-4.1364e-10	6.83611e-10	1.28481e-08	5.58261e-10	3.29119e-09	4.75921e-10	-1.14385e-10	1.17238e-10	-3.06837e-10	1.03728e-10
951.123	11.2245	1.39526e-09	0	0	0	0	-2.11288e-10	0	-9.7182e-10	0	4.86695e-10	4.90807e-10	8.77229e-10	1.66289e-09	-1.20398e-09	0	0	0
959.679	12.4243	0	0	0	0	0	0	0	0	0	0	0	0	0	0	0	0	0
969.494	12.4752	0	0	0	0	0	0	0	0	0	0	0	0	0	0	0	0	0
978.688	12.2031	0	0	0	0	0	0	0	0	0	0	0	0	0	0	0	0	0
988.394	12.4208	0	0	0	0	0	0	0	0	0	0	0	0	0	0	0	0	0
998.492	13.0605	0	0	0	0	0	0	0	0	0	0	0	0	0	0	0	0	0
1008.29	12.7977	0	0	0	0	0	0	0	0	0	0	0	0	0	0	0	0	0
1018.18	13.3457	0	0	0	0	0	0	0	0	0	0	0	0	0	0	0	0	0
1028.97	13.3271	0	2.27391e-09	0	0	0	0	0	0	0	0	0	-4.84396e-10	0	0	1.17948e-09	0	0
1038.22	13.3406	4.63263e-07	4.13494e-07	3.68427e-07	3.8838e-07	3.82125e-07	3.75742e-07	3.33731e-07	3.48175e-07	3.77542e-07	4.0029e-07	3.60876e-07	3.6257e-07	3.56146e-07	3.44438e-07	3.38862e-07	2.9879e-07	3.14913e-07
1047.9	13.6246	8.41385e-07	6.95062e-07	6.89723e-07	7.02953e-07	6.68453e-07	6.45886e-07	6.01573e-07	5.85719e-07	5.27765e-07	4.84293e-07	3.6447e-07	2.98323e-07	1.90204e-07	7.19782e-10	-2.92171e-07	-6.19725e-07	-8.00811e-07
1057.87	13.8052	4.53009e-07	4.38551e-07	4.21703e-07	4.15289e-07	3.84161e-07	4.184e-07	3.80096e-07	3.94569e-07	3.50906e-07	3.0939e-07	2.72633e-07	2.43563e-07	2.16975e-07	1.85969e-07	1.29124e-07	1.70341e-08	-3.42916e-08
1068.11	14.0138	1.7396e-07	1.81202e-07	2.21207e-07	1.51264e-07	1.44921e-07	2.20226e-07	1.68967e-07	1.74411e-07	1.35758e-07	1.84512e-07	1.68694e-07	1.68945e-07	1.60833e-07	1.57387e-07	1.47792e-07	1.46363e-07	1.35445e-07
1078.56	14.1443	3.40468e-08	1.40616e-08	3.01756e-08	1.1534e-08	2.7581e-08	9.99971e-10	0	2.45852e-08	9.97157e-09	2.15204e-08	1.51157e-08	1.07546e-08	1.62788e-08	1.95954e-08	1.73674e-08	1.73165e-08	1.88014e-08
1089.09	14.237	0	0	0	7.55609e-09	0	8.44806e-10	2.72962e-09	3.26172e-10	0	2.54377e-09	2.44876e-09	4.25749e-09	-1.67229e-09	1.23088e-12	7.84516e-10	1.22414e-09	-3.09012e-10
1099.62	14.2462	0	0	0	0	0	4.54041e-10	0	1.15281e-09	1.76828e-09	5.74219e-10	6.90206e-10	4.3337e-10	3.3244e-10	-1.59859e-09	-2.81759e-09	-7.79045e-09	-4.8143e-09
1110.27	14.509	8.72844e-10	1.34769e-09	1.5854e-09	4.90099e-10	4.70681e-26	8.58511e-10	0	1.59897e-09	1.59665e-10	-6.69729e-10	1.8911e-09	1.49141e-09	-8.22116e-10	1.16496e-09	-3.7817e-10	-2.03837e-09	0
1121.01	14.2789	1.6535e-09	1.86555e-09	1.67944e-09	2.07426e-10	7.91745e-10	3.00795e-10	-1.14565e-09	2.39361e-10	7.37136e-10	-4.08721e-10	-1.69057e-25	-2.38415e-09	-1.28925e-09	6.92202e-09	-3.12377e-09	-4.49127e-09	0
1131.68	14.4797	2.97476e-09	2.86402e-09	7.92978e-10	7.69171e-10	0	-6.24958e-10	1.87242e-09	0	2.60351e-09	9.49586e-10	2.4683e-09	0	5.83541e-10	-4.7654e-09	2.21274e-09	2.76402e-09	2.55978e-09
1142.36	14.3065	0	0	0	0	0	0	0	0	1.5051e-09	0	0	0	0	-3.19579e-09	1.13757e-24	0	0
1153	14.5513	0	0	-1.06237e-09	0	0	0	0	-9.47133e-10	2.30929e-09	0	0	0	-3.10377e-09	0	0	0	2.935e-09
1164.03	14.8343	0	0	0	0	0	0	0	0	0	0	0	-2.7547e-10	0	0	0	-2.04304e-25	-4.62291e-09
1175.07	14.4813	0	0	0	0	0	0	0	0	0	0	0	0	0	0	0	2.56091e-25	-5.32505e-09
1185.9	14.5792	0	0	0	0	0	0	0	0	0	0	0	0	0	0	0	1.33629e-09	0
1196.7	14.5482	2.695e-06	2.48124e-06	2.47448e-06	2.47086e-06	2.46012e-06	2.45178e-06	2.44343e-06	2.43734e-06	2.42297e-06	2.41566e-06	2.39919e-06	2.39269e-06	2.35754e-06	2.31697e-06	2.286e-06	2.20511e-06	2.27591e-06
1207.6	14.6949	2.71883e-05	2.55268e-05	2.54006e-05	2.529e-05	2.52103e-05	2.50885e-05	2.49934e-05	2.48146e-05	2.46506e-05	2.4485e-05	2.42414e-05	2.41285e-05	2.35548e-05	2.292e-05	2.25953e-05	2.06318e-05	2.05867e-05
1218.23	14.5848	1.90071e-05	1.74066e-05	1.73197e-05	1.72287e-05	1.71505e-05	1.70706e-05	1.69887e-05	1.68439e-05	1.67031e-05	1.66072e-05	1.64798e-05	1.64508e-05	1.60318e-05	1.56022e-05	1.54302e-05	1.36284e-05	1.39365e-05
1229.48	15.038	6.51067e-06	5.92683e-06	5.88304e-06	5.85458e-06	5.82645e-06	5.79584e-06	5.7662e-06	5.70248e-06	5.62766e-06	5.58081e-06	5.51607e-06	5.48639e-06	5.32848e-06	5.1608e-06	5.03185e-06	4.25907e-06	4.35554e-06
1240.57	14.5454	5.5221e-07	5.19713e-07	5.13603e-07	5.08449e-07	4.97923e-07	5.10408e-07	4.9777e-07	4.88499e-07	4.9098e-07	4.90224e-07	4.81534e-07	4.70876e-07	4.71234e-07	4.59226e-07	4.34771e-07	4.0978e-07	4.26518e-07
1251.35	14.976	1.93072e-07	1.36576e-07	1.32976e-07	1.34706e-07	1.42782e-07	1.39441e-07	1.32077e-07	1.35144e-07	1.2809e-07	1.29403e-07	1.34678e-07	1.28365e-07	1.27558e-07	1.30093e-07	1.20447e-07	1.22447e-07	8.67529e-08
1262.86	15.0231	2.37574e-07	2.01794e-07	2.00076e-07	2.03443e-07	2.02211e-07	1.94371e-07	2.02336e-07	1.96851e-07	2.01051e-07	2.00026e-07	2.03865e-07	1.9087e-07	1.82169e-07	1.85656e-07	2.26414e-07	1.79019e-07	2.03512e-07
1273.81	14.6921	9.42427e-09	8.22691e-09	1.08737e-08	8.4254e-09	8.82823e-09	5.69064e-09	1.09299e-08	8.41805e-09	7.18358e-09	1.79938e-08	5.4812e-09	3.89455e-09	3.8291e-09	6.7563e-09	1.32267e-08	1.85503e-08	1.58201e-08
1284.76	14.6612	6.46485e-07	6.07252e-07	6.06882e-07	5.97583e-07	5.91937e-07	6.03763e-07	6.03955e-07	5.88503e-07	5.88135e-07	5.75732e-07	5.87192e-07	6.20793e-07	6.69326e-07	6.80057e-07	7.25412e-07	4.01927e-07	-1.90208e-08
1295.65	14.6497	1.50327e-06	1.21011e-06	1.21086e-06	1.20259e-06	1.19305e-06	1.18813e-06	1.22428e-06	1.20122e-06	1.24987e-06	1.22413e-06	1.29612e-06	1.28172e-06	1.25176e-06	1.07062e-06	5.4398e-07	-4.26675e-07	-1.41669e-06
1306.5	14.6907	3.81867e-07	3.65445e-07	3.6851e-07	3.66772e-07	3.77518e-07	3.76865e-07	3.7421e-07	3.75506e-07	3.73664e-07	3.70312e-07	3.69384e-07	3.81352e-07	3.65133e-07	3.51385e-07	4.07911e-07	3.94347e-07	3.5497e-07
1317.47	14.8011	6.22267e-06	5.99427e-06	5.97654e-06	5.95519e-06	5.95805e-06	5.93023e-06	5.93289e-06	5.9059e-06	5.86259e-06	5.83946e-06	5.79924e-06	5.75303e-06	5.54905e-06	5.37859e-06	5.44614e-06	5.99229e-06	7.07192e-06
1328.54	14.8526	5.38135e-07	4.77231e-07	4.7916e-07	4.75197e-07	4.74185e-07	4.71833e-07	4.80995e-07	4.69013e-07	4.83033e-07	4.68134e-07	4.27695e-07	4.17696e-07	3.89436e-07	3.60709e-07	4.29831e-07	4.12732e-07	2.17716e-07
1339.4	14.642	2.80825e-06	2.93815e-06	2.9403e-06	2.95856e-06	2.9332e-06	2.92665e-06	2.92252e-06	2.90863e-06	2.88332e-06	2.85813e-06	2.83055e-06	2.87723e-06	2.84486e-06	2.90532e-06	3.05994e-06	3.18998e-06	3.33592e-06
1350.04	14.7152	1.64915e-06	1.24367e-06	1.22846e-06	1.23897e-06	1.25197e-06	1.24042e-06	1.21066e-06	1.1752e-06	1.21303e-06	1.18756e-06	1.14802e-06	1.17866e-06	1.12973e-06	1.13441e-06	1.17225e-06	1.09046e-06	1.15843e-06
1361.33	15.4178	1.2106e-07	1.49121e-07	1.4278e-07	1.43915e-07	1.41797e-07	1.56045e-07	1.71663e-07	1.43843e-07	1.38953e-07	1.7405e-07	1.51138e-07	1.52347e-07	1.40222e-07	1.52901e-07	1.43247e-07	1.59452e-07	1.5878e-07
1373.13	14.528	4.18276e-07	5.62249e-07	5.69001e-07	5.85807e-07	5.90187e-07	5.77932e-07	5.89428e-07	5.75226e-07	5.68174e-07	5.37089e-07	6.20753e-07	5.77522e-07	6.32808e-07	5.92987e-07	6.1613e-07	6.67205e-07	7.08226e-07
1383.51	15.022	9.72625e-08	7.61148e-08	1.04147e-07	1.14592e-07	8.17816e-08	8.23864e-08	1.34843e-07	7.80538e-08	9.09809e-08	8.76665e-08	1.11949e-07	1.08977e-07	9.95117e-08	9.34626e-08	1.10733e-07	1.0729e-07	1.18508e-07
1394.92	14.3512	1.19809e-08	-1.90361e-09	3.25893e-09	6.4777e-09	3.0752e-09	-5.51174e-10	3.00427e-08	1.35057e-08	5.77569e-09	7.77e-10	-1.02634e-09	3.19683e-08	-4.95197e-09	3.04038e-08	2.80708e-09	1.17925e-08	-4.01163e-09
1405.76	14.603	1.98971e-09	1.97478e-09	2.67459e-10	-8.0862e-10	-7.78997e-10	9.35058e-10	5.34767e-09	-4.57869e-09	1.71092e-09	-5.22216e-09	-4.53899e-09	9.96915e-11	-4.54198e-09	1.02103e-10	-2.12152e-09	6.97682e-10	-1.55757e-09
1416.7	14.4414	8.80624e-24	6.05303e-09	1.58976e-08	2.26201e-09	4.10929e-09	4.67504e-10	-4.32207e-10	1.67139e-09	-3.20563e-09	-7.54696e-09	1.90764e-08	2.04548e-10	1.16692e-08	1.49574e-09	-1.62013e-09	-4.03165e-09	3.23644e-09
1427.45	14.3086	7.42724e-05	7.1747e-05	7.15169e-05	7.12861e-05	7.1061e-05	7.08548e-05	7.06199e-05	7.01307e-05	6.9668e-05	6.9198e-05	6.81955e-05	6.71035e-05	6.59059e-05	6.39162e-05	6.00887e-05	5.55974e-05	5.09024e-05
1438.5	14.7756	0.000250657	0.000226847	0.000225862	0.00022491	0.000223923	0.000222942	0.000221938	0.00021997	0.000218028	0.000216011	0.000212077	0.000208154	0.00020343	0.000196149	0.00018329	0.000168648	0.000154397
1449.25	14.0094	3.81839e-05	3.41708e-05	3.40702e-05	3.39987e-05	3.39208e-05	3.37737e-05	3.3687e-05	3.35083e-05	3.33565e-05	3.31593e-05	3.2924e-05	3.27848e-05	3.23894e-05	3.1777e-05	3.10904e-05	3.0425e-05	3.02296e-05
1459.41	13.9458	1.08704e-06	1.00076e-06	1.015e-06	1.02901e-06	1.00917e-06	9.92263e-07	1.00341e-06	9.96678e-07	1.00118e-06	9.9094e-07	9.84894e-07	1.00914e-06	1.01578e-06	1.01625e-06	9.67671e-07	1.13307e-06	1.13434e-06
1470.03	14.5203	6.41268e-06	6.51121e-06	6.51382e-06	6.53501e-06	6.51468e-06	6.52793e-06	6.52802e-06	6.53236e-06	6.57767e-06	6.58826e-06	6.63314e-06	6.67647e-06	6.74022e-06	6.84064e-06	7.19815e-06	7.45854e-06	8.00346e-06
1480.99	14.3435	6.08012e-06	6.34937e-06	6.32587e-06	6.33784e-06	6.32406e-06	6.3247e-06	6.32118e-06	6.32342e-06	6.36387e-06	6.36485e-06	6.39438e-06	6.46835e-06	6.508e-06	6.6821e-06	7.15964e-06	7.50637e-06	8.03532e-06
1491.53	14.1138	2.38997e-06	2.09542e-06	2.09522e-06	2.0836e-06	2.03424e-06	1.97509e-06	1.96878e-06	1.96709e-06	1.81266e-06	1.77953e-06	1.66681e-06	1.57846e-06	1.51011e-06	1.39038e-06	1.31321e-06	9.7588e-07	6.18433e-07
1502.1	14.2618	1.45779e-06	1.40889e-06	1.4069e-06	1.41032e-06	1.40015e-06	1.41348e-06	1.41782e-06	1.39431e-06	1.35857e-06	1.3761e-06	1.34036e-06	1.31584e-06	1.26674e-06	1.28186e-06	1.46767e-06	1.28829e-06	1.29476e-06
1512.73	14.1849	2.8809e-08	1.92434e-08	1.59522e-08	2.00086e-08	1.47881e-08	2.35495e-08	1.31113e-08	3.38216e-09	1.76252e-08	3.4523e-08	2.42087e-08	2.5896e-08	3.1418e-08	1.07875e-08	3.43541e-08	3.72422e-08	6.12305e-08
1523.31	14.1186	2.51972e-06	2.25295e-06	2.22415e-06	2.17426e-06	2.19822e-06	2.13621e-06	2.06133e-06	2.02949e-06	1.88144e-06	1.79619e-06	1.78363e-06	1.77046e-06	1.57275e-06	1.63657e-06	1.43235e-06	-1.62073e-07	-2.29463e-07
1533.88	14.0897	3.01785e-05	2.86377e-05	2.84565e-05	2.83015e-05	2.81798e-05	2.80159e-05	2.78494e-05	2.76196e-05	2.73592e-05	2.71474e-05	2.70573e-05	2.71878e-05	2.61892e-05	2.52419e-05	2.47095e-05	1.96098e-05	2.15031e-05
1544.35	13.9804	1.67364e-05	1.59053e-05	1.58546e-05	1.57718e-05	1.56768e-05	1.56205e-05	1.55381e-05	1.5399e-05	1.5278e-05	1.52492e-05	1.5057e-05	1.50444e-05	1.45618e-05	1.40289e-05	1.43727e-05	1.15524e-05	1.20118e-05
1554.88	14.0528	2.96373e-07	3.01179e-07	3.15205e-07	2.94742e-07	3.10794e-07	3.03785e-07	2.83948e-07	2.81173e-07	2.96501e-07	2.86447e-07	2.96699e-07	3.00163e-07	2.61833e-07	2.38214e-07	2.97595e-07	1.41399e-07	4.13853e-07
1565.38	13.924	5.1921e-05	5.54775e-05	5.51473e-05	5.48914e-05	5.46287e-05	5.42647e-05	5.40512e-05	5.35013e-05	5.31897e-05	5.28713e-05	5.24629e-05	5.20112e-05	5.05126e-05	4.83505e-05	4.59659e-05	4.07833e-05	4.16122e-05
1575.67	13.7729	0.000198621	0.000229237	0.000228017	0.000226946	0.00022589	0.000224726	0.000223801	0.000221709	0.000220028	0.000218533	0.000216092	0.000214577	0.000209279	0.000202083	0.000192091	0.000167934	0.000158209
1585.92	13.7984	4.3689e-05	4.6895e-05	4.66276e-05	4.63333e-05	4.60891e-05	4.59172e-05	4.5682e-05	4.52679e-05	4.49482e-05	4.46212e-05	4.40283e-05	4.36732e-05	4.25267e-05	4.0911e-05	3.9319e-05	3.33327e-05	3.34772e-05
1596.24	13.7969	5.95242e-05	6.71053e-05	6.67698e-05	6.65151e-05	6.62276e-05	6.59043e-05	6.56161e-05	6.51412e-05	6.4689e-05	6.42613e-05	6.369e-05	6.34767e-05	6.16243e-05	5.89788e-05	5.49521e-05	4.53402e-05	4.30356e-05
1606.5	13.7232	0.000190958	0.000227215	0.000226253	0.00022505	0.000224049	0.000223061	0.000222048	0.000220292	0.000218573	0.000217475	0.00021477	0.000213029	0.000207489	0.000198456	0.000187938	0.000160527	0.000150333
1616.86	13.8942	5.40274e-05	5.7163e-05	5.66612e-05	5.63608e-05	5.59182e-05	5.57488e-05	5.52994e-05	5.47581e-05	5.41804e-05	5.37908e-05	5.2917e-05	5.24503e-05	5.08841e-05	4.937e-05	4.97298e-05	4.07615e-05	4.11319e-05
1627.04	13.4867	4.191e-06	3.64849e-06	3.60697e-06	3.4422e-06	3.27489e-06	3.255e-06	2.94709e-06	2.78905e-06	2.38707e-06	2.39344e-06	2.38178e-06	2.35216e-06	2.11373e-06	1.62143e-06	6.20543e-07	-5.72222e-07	-1.31214e-06
1637.06	13.4903	1.6299e-05	1.55033e-05	1.54408e-05	1.5303e-05	1.5245e-05	1.51486e-05	1.50284e-05	1.48652e-05	1.47973e-05	1.46818e-05	1.45052e-05	1.45373e-05	1.39669e-05	1.30295e-05	1.22868e-05	8.30225e-06	9.28236e-06
1647.21	13.4457	3.16146e-05	3.06707e-05	3.05194e-05	3.03858e-05	3.02822e-05	3.0166e-05	3.00533e-05	2.99217e-05	2.98269e-05	2.98214e-05	2.99663e-05	3.04902e-05	2.93812e-05	2.80798e-05	2.75263e-05	2.26393e-05	2.71305e-05
1656.95	12.8478	7.88908e-06	7.2904e-06	7.18948e-06	7.14065e-06	7.03549e-06	6.99529e-06	7.09308e-06	6.93209e-06	6.92863e-06	6.90242e-06	6.95732e-06	7.14854e-06	6.82826e-06	6.12449e-06	6.56844e-06	5.55163e-06	7.08209e-06
1667.11	13.578	1.95183e-06	1.79912e-06	1.74656e-06	1.7202e-06	1.66557e-06	1.65275e-06	1.64719e-06	1.55116e-06	1.53836e-06	1.49777e-06	1.55001e-06	1.60769e-06	1.51476e-06	1.35127e-06	9.79663e-07	2.45607e-07	3.38569e-07
1677.32	13.0764	4.23391e-07	3.6877e-07	3.71586e-07	3.72729e-07	3.63606e-07	3.64474e-07	3.89704e-07	3.55565e-07	3.51958e-07	3.57085e-07	3.684e-07	3.54644e-07	3.67327e-07	3.77862e-07	3.39795e-07	2.26498e-07	3.18561e-07
1687.34	13.101	1.1079e-07	9.47507e-08	8.52069e-08	8.15073e-08	1.02702e-07	8.04025e-08	1.08609e-07	9.52271e-08	8.96669e-08	1.09811e-07	1.11974e-07	9.43474e-08	3.1077e-08	1.14337e-07	1.09962e-07	7.56842e-08	1.00715e-07
1697.21	13.2224	8.29933e-09	1.53348e-09	3.10357e-09	1.15301e-08	4.35129e-10	1.71045e-08	2.7845e-08	1.80559e-08	2.51072e-08	1.97139e-08	4.73999e-08	4.47497e-09	1.18436e-08	7.13866e-09	-4.03836e-09	9.55377e-09	1.73765e-09
1707.02	13.2015	2.17812e-08	2.01192e-08	2.93236e-08	2.92075e-08	6.42155e-09	4.62003e-08	2.0211e-08	3.91102e-08	2.47587e-08	1.07199e-08	2.56981e-08	3.73871e-08	5.31669e-08	2.8923e-08	2.33685e-08	1.5619e-08	1.80535e-08
1716.81	12.9751	9.01792e-09	2.05675e-08	4.33635e-09	1.17462e-08	5.85732e-09	1.18377e-08	6.67973e-09	1.55202e-08	8.85928e-09	1.24498e-08	1.04636e-08	1.47829e-08	1.83238e-08	1.51245e-08	4.92789e-09	-6.53742e-10	-8.04596e-09
1726.58	12.8046	9.70707e-09	1.07718e-08	2.17723e-09	1.22697e-08	1.81137e-08	1.86679e-08	0	0	1.88887e-08	1.92874e-08	0	3.81345e-09	1.05789e-08	5.18007e-09	3.65422e-08	8.39541e-09	2.4297e-09
1736.38	12.8313	0	-4.60379e-25	0	3.61412e-09	6.87314e-09	0	0	0	0	-9.23241e-09	1.77614e-09	5.1941e-09	0	2.22352e-09	0	5.18937e-09	4.4745e-09
1746.1	13.0023	0	0	4.13398e-09	0	4.9355e-09	0	5.69392e-09	-1.26785e-08	0	-7.6827e-09	2.92855e-09	4.03727e-09	-1.29179e-08	0	0	-1.38918e-08	1.25664e-08
1755.77	13.0233	2.26575e-07	2.41455e-07	2.28421e-07	1.82193e-07	2.12062e-07	2.20564e-07	2.28192e-07	1.87502e-07	2.13132e-07	1.91872e-07	2.55001e-07	2.18827e-07	1.80689e-07	2.59069e-07	2.14551e-07	2.09885e-07	2.90615e-07
1765.44	12.6574	1.71533e-07	1.48684e-07	1.48623e-07	1.2062e-07	1.40969e-07	1.59058e-07	1.31909e-07	1.29541e-07	1.13864e-07	1.20339e-07	1.35124e-07	1.17092e-07	1.42647e-07	1.45503e-07	1.52651e-07	1.34096e-07	1.5087e-07
1775.04	12.4278	2.13335e-08	4.51046e-08	4.82334e-08	1.24939e-08	4.74367e-08	2.78638e-08	2.042e-08	2.55301e-08	0	1.48258e-08	1.92722e-08	3.39382e-08	1.18211e-08	1.75726e-08	3.08596e-09	2.55554e-08	2.6495e-08
1784.57	12.6008	1.38844e-07	1.79598e-07	1.54264e-07	1.39139e-07	1.26964e-07	1.69645e-07	1.75131e-07	1.68171e-07	1.1019e-07	1.58904e-07	1.63697e-07	1.18214e-07	1.16959e-07	1.23476e-07	1.43827e-07	1.88209e-07	2.25379e-07
1793.88	12.697	1.38804e-07	1.5592e-07	1.7653e-07	1.89323e-07	1.05137e-07	1.53132e-07	1.64832e-07	1.70547e-07	1.38428e-07	1.2567e-07	1.25754e-07	1.40166e-07	1.59535e-07	1.13539e-07	1.44839e-07	2.04223e-07	2.45388e-07
1803.51	12.5221	6.39956e-08	6.16755e-08	7.21271e-08	6.49395e-08	5.96553e-08	2.56938e-08	1.40297e-08	6.1329e-08	6.04957e-08	3.04665e-08	1.86597e-08	4.64092e-08	1.42557e-08	1.01248e-07	6.35504e-08	3.48641e-08	5.65187e-08
1812.93	12.2902	3.09867e-11	1.54738e-09	5.17446e-10	7.75724e-09	8.46952e-09	1.38858e-08	7.60553e-09	1.04195e-08	-1.07819e-09	9.18534e-10	5.85187e-09	8.6851e-09	1.95298e-08	1.70263e-08	2.28127e-08	6.47339e-09	1.67845e-08
1822.29	12.8994	-2.45641e-09	-2.4948e-08	-2.25599e-08	6.85092e-09	-7.47783e-09	-2.85496e-08	7.69597e-09	-2.52525e-08	-3.23621e-08	-2.31452e-08	-1.85458e-08	-2.56208e-08	-3.5897e-08	-3.693e-08	-5.01875e-08	-8.44347e-08	-4.39941e-08
1831.86	12.321	4.51134e-08	1.07537e-07	1.13735e-07	1.03899e-07	1.08054e-07	9.03099e-08	1.04457e-07	1.08892e-07	9.92393e-08	1.09925e-07	1.13066e-07	9.26379e-08	1.08028e-07	1.18915e-07	1.0306e-07	7.64137e-08	1.05348e-07
1841.17	12.4709	-1.66694e-08	-3.41223e-08	-3.41628e-08	-3.42053e-08	-6.68559e-08	-3.42976e-08	-3.43473e-08	-3.44544e-08	-3.45727e-08	-3.76042e-08	-6.96988e-08	-3.67552e-08	-3.42298e-08	-3.50671e-08	-3.71487e-08	-4.04097e-08	-4.35176e-08
1850.44	12.3586	-2.91066e-08	-6.90463e-08	-6.91565e-08	-6.92721e-08	-6.93945e-08	-7.15321e-08	-7.16712e-08	-7.11049e-08	-7.14326e-08	-7.17938e-08	-7.26305e-08	-7.36416e-08	-7.36634e-08	-1.09042e-07	-8.177e-08	-9.05457e-08	-9.88189e-08
1859.48	12.2035	-4.00316e-09	-9.04267e-09	-8.33282e-09	-1.07055e-08	-1.13234e-08	3.61089e-09	-1.13644e-08	6.8285e-09	-1.03615e-09	6.70408e-10	-9.99492e-09	-1.24201e-08	-1.03034e-08	-7.49197e-09	-2.41772e-08	-8.91451e-09	-1.63082e-08
1868.14	11.3546	1.42062e-06	3.24968e-06	3.25759e-06	3.26931e-06	3.24742e-06	3.30756e-06	3.30246e-06	3.34373e-06	3.33079e-06	3.38929e-06	3.38242e-06	3.42821e-06	3.49165e-06	3.60573e-06	3.84367e-06	4.20303e-06	4.53571e-06
1878.47	12.6107	5.80553e-05	4.18797e-05	4.17588e-05	4.17345e-05	4.16646e-05	4.15113e-05	4.14122e-05	4.1242e-05	4.1121e-05	4.08479e-05	4.04754e-05	4.00433e-05	3.95982e-05	3.8871e-05	3.7396e-05	3.6011e-05	3.49452e-05
1886.94	11.5635	3.33111e-05	2.8828e-05	2.8815e-05	2.87946e-05	2.87281e-05	2.86835e-05	2.86482e-05	2.86239e-05	2.85791e-05	2.84547e-05	2.83036e-05	2.81531e-05	2.80681e-05	2.78341e-05	2.74163e-05	2.72496e-05	2.7208e-05
1895.88	11.5962	4.90023e-06	9.13179e-06	9.22762e-06	9.22742e-06	9.24569e-06	9.29359e-06	9.29199e-06	9.36468e-06	9.43449e-06	9.52032e-06	9.67729e-06	9.82936e-06	1.01081e-05	1.04816e-05	1.13215e-05	1.2773e-05	1.40272e-05
1904.73	12.5711	2.44768e-06	4.51076e-06	4.47001e-06	4.55371e-06	4.54945e-06	4.58641e-06	4.59247e-06	4.6064e-06	4.54941e-06	4.59236e-06	4.68938e-06	4.67222e-06	4.78025e-06	4.9307e-06	5.33585e-06	5.75512e-06	6.23447e-06
1914.15	11.7418	6.57229e-07	8.27121e-07	8.31667e-07	8.35031e-07	8.44122e-07	8.03781e-07	8.7725e-07	8.37831e-07	8.09225e-07	8.06119e-07	8.38331e-07	8.96016e-07	8.63087e-07	8.87225e-07	8.67675e-07	1.14786e-06	1.02536e-06
1923.18	12.0039	5.35692e-07	6.20999e-07	5.79621e-07	6.3543e-07	5.77869e-07	6.02966e-07	6.49577e-07	6.23417e-07	6.20719e-07	6.14113e-07	6.22817e-07	6.78549e-07	6.55003e-07	6.4509e-07	7.30115e-07	8.28756e-07	9.36707e-07
1932.06	11.6661	4.06581e-06	3.48349e-06	3.27319e-06	3.33734e-06	3.30813e-06	3.26309e-06	3.28125e-06	3.24306e-06	3.25416e-06	3.31122e-06	3.28084e-06	3.31814e-06	3.34903e-06	3.42883e-06	3.61968e-06	3.83371e-06	4.31051e-06
1940.92	11.8169	0.000203545	0.000151414	0.000150379	0.000149119	0.000148158	0.000146944	0.00014594	0.000143749	0.000141567	0.000139494	0.000135161	0.000131124	0.000126543	0.000119853	0.000109076	9.86478e-05	8.92004e-05
1949.71	11.5385	0.000892936	0.000756649	0.00075233	0.000747967	0.00074362	0.00073916	0.000734751	0.000725765	0.000716754	0.000707647	0.000689161	0.00067044	0.000650744	0.000619298	0.00055981	0.00050011	0.000436319
1958.44	11.4733	0.00129527	0.00110886	0.00110395	0.00109899	0.001094	0.00108901	0.00108393	0.00107372	0.00106339	0.00105285	0.00103122	0.00100905	0.000984378	0.000944408	0.000866362	0.000783472	0.000698484
1967.13	11.5707	0.000981964	0.000891013	0.000886909	0.000882868	0.000878889	0.000874893	0.000870881	0.000862824	0.00085491	0.000847033	0.000831084	0.000814892	0.00079781	0.000771462	0.000723066	0.000673995	0.000620579
1975.83	11.4434	0.000264218	0.000273656	0.000272394	0.000271081	0.000269847	0.000268584	0.000267158	0.000264737	0.000262388	0.000259932	0.000255269	0.000250821	0.000244236	0.000233605	0.000213461	0.000186106	0.000160768
1984.58	11.6345	4.85118e-05	4.5179e-05	4.49813e-05	4.47378e-05	4.488e-05	4.45259e-05	4.45882e-05	4.4167e-05	4.42838e-05	4.44038e-05	4.44748e-05	4.52525e-05	4.46226e-05	4.3527e-05	4.37461e-05	3.90112e-05	4.43214e-05
1993.29	11.3157	0.000195454	0.000193256	0.000192817	0.000192061	0.000191691	0.000191178	0.000190743	0.000189938	0.000189149	0.000188444	0.000187344	0.000186434	0.000183598	0.000179571	0.000171849	0.000160516	0.00015632
2001.88	11.4422	0.00206492	0.00181131	0.00180393	0.00179654	0.00178895	0.0017813	0.0017734	0.00175768	0.00174136	0.00172454	0.00168928	0.00165154	0.00161404	0.0015513	0.00142088	0.00129049	0.00115001
2010.46	11.2577	0.00285026	0.00239959	0.0023877	0.0023756	0.00236318	0.00235097	0.00233843	0.00231291	0.00228675	0.00225988	0.00220367	0.00214344	0.00208716	0.00199376	0.00180056	0.00161946	0.00141728
2019.09	11.3366	0.00169843	0.00148601	0.00147973	0.00147337	0.00146686	0.00146042	0.00145393	0.00144068	0.00142738	0.00141365	0.00138549	0.00135588	0.00132716	0.00127975	0.00118346	0.00109174	0.000981578
2027.54	11.1218	0.000543158	0.000531707	0.000528906	0.000526338	0.000523835	0.000521318	0.000518751	0.000513767	0.000509022	0.000504167	0.000494778	0.000485408	0.000473982	0.000457015	0.000424362	0.000380802	0.000347358
2036.04	11.2636	0.000284481	0.000276589	0.000275357	0.000273617	0.000272369	0.000270852	0.000269623	0.000267071	0.000265058	0.000263186	0.000260801	0.000260365	0.000253699	0.000245086	0.000237838	0.000199996	0.000210428
2044.46	11.0174	0.000398224	0.000424301	0.000422634	0.000420252	0.000418791	0.000416949	0.00041533	0.000411696	0.000408161	0.000404827	0.000399144	0.000394899	0.000386652	0.000373379	0.000349198	0.000304737	0.000285043
2052.82	11.071	0.00102949	0.00101995	0.00101544	0.00101073	0.00100599	0.00100132	0.000996487	0.000986277	0.000976369	0.000965663	0.000943825	0.000920144	0.000900971	0.000869625	0.000801618	0.000746515	0.000677601
2061.17	10.9786	0.000775195	0.000772767	0.000769233	0.000765659	0.000762055	0.000758606	0.000755043	0.000747622	0.000740605	0.000732803	0.000717903	0.000701821	0.000686806	0.000661628	0.000610533	0.00055956	0.000504426
2069.56	11.1227	0.000784379	0.000767517	0.000763774	0.000759878	0.000755973	0.000752464	0.000748746	0.000741142	0.000733439	0.000725716	0.000709461	0.000692491	0.000677774	0.000654184	0.000606035	0.000555577	0.000504583
2077.8	10.9102	0.000429276	0.00044017	0.000437993	0.000435889	0.000433686	0.000431811	0.000429734	0.00042615	0.000422756	0.000419341	0.00041318	0.000408357	0.000398787	0.000383951	0.000361662	0.000315729	0.00029768
2086.15	11.0754	0.000297744	0.000294676	0.000293082	0.000291279	0.000289525	0.000287902	0.000286485	0.000283418	0.000281127	0.000278653	0.000275242	0.000273851	0.000265476	0.000253909	0.000239877	0.000199927	0.000202574
2094.44	10.8328	0.000135796	0.000127739	0.000126683	0.000125809	0.000124916	0.000124158	0.000123291	0.00012185	0.000120721	0.00011972	0.000118712	0.000119157	0.000114546	0.000109138	0.000107954	7.47162e-05	9.40019e-05
2102.57	10.8621	4.66161e-05	4.48315e-05	4.46688e-05	4.46036e-05	4.4466e-05	4.41906e-05	4.40405e-05	4.37737e-05	4.4518e-05	4.44987e-05	4.57926e-05	4.62259e-05	4.44189e-05	4.24131e-05	3.99885e-05	2.46268e-05	5.10703e-05
2110.82	10.851	2.74199e-05	2.50587e-05	2.50048e-05	2.47228e-05	2.49267e-05	2.4649e-05	2.4503e-05	2.46727e-05	2.45539e-05	2.38325e-05	2.40673e-05	2.46286e-05	2.41551e-05	2.29488e-05	1.66595e-05	8.55862e-06	1.46622e-05
2118.99	10.8112	1.23224e-05	1.02928e-05	1.02612e-05	9.64923e-06	9.69753e-06	8.99286e-06	8.84628e-06	8.67691e-06	8.08627e-06	7.40129e-06	6.86651e-06	6.74569e-06	5.58173e-06	4.16486e-06	2.73003e-06	-6.64888e-06	-8.46576e-06
2127.12	10.6388	2.76464e-06	2.59935e-06	2.47275e-06	2.31326e-06	2.2925e-06	2.00949e-06	2.0411e-06	1.85297e-06	1.73494e-06	1.75182e-06	1.64528e-06	1.65733e-06	1.26915e-06	9.63921e-07	5.12453e-07	-2.67552e-06	-2.33014e-06
2135.24	10.7428	1.83187e-06	1.5917e-06	1.5855e-06	1.58366e-06	1.53314e-06	1.49851e-06	1.47333e-06	1.32502e-06	1.097e-06	1.10062e-06	9.01431e-07	6.95733e-07	4.27117e-07	5.32306e-08	-5.29399e-07	-3.4065e-06	-3.70951e-06
2143.22	10.5323	5.02753e-06	4.15275e-06	4.32837e-06	3.86866e-06	4.04266e-06	3.63125e-06	3.87324e-06	3.52361e-06	3.0645e-06	2.87159e-06	1.98199e-06	1.98538e-06	1.05037e-06	4.79091e-07	6.26782e-07	3.68375e-06	1.49643e-05
2151.13	10.577	1.67798e-05	1.48408e-05	1.48094e-05	1.44525e-05	1.43604e-05	1.40112e-05	1.40305e-05	1.35513e-05	1.31509e-05	1.28086e-05	1.19841e-05	1.16987e-05	1.2104e-05	1.3462e-05	2.04931e-05	2.16418e-05	3.73339e-05
2159.29	10.8203	1.17172e-05	1.00847e-05	9.62246e-06	9.42469e-06	9.50491e-06	9.35345e-06	8.69201e-06	8.45667e-06	8.04489e-06	7.75942e-06	7.15172e-06	6.68573e-06	5.52434e-06	3.84303e-06	9.1935e-07	4.66212e-06	2.05847e-05
2167.24	10.2622	9.61856e-06	9.03494e-06	8.95009e-06	8.83072e-06	8.34783e-06	8.24857e-06	8.09447e-06	7.74737e-06	7.44819e-06	7.1272e-06	6.25622e-06	6.25698e-06	5.31527e-06	3.75512e-06	5.98654e-07	-3.74586e-06	1.13396e-06
2175.09	10.6874	3.3837e-06	2.59433e-06	2.51878e-06	2.74377e-06	2.49397e-06	2.3831e-06	2.29676e-06	2.25863e-06	2.21152e-06	2.11334e-06	1.48276e-06	1.279e-06	6.04997e-07	-1.27826e-06	-4.0541e-06	-9.42567e-06	-1.44796e-05
2183.15	10.3148	7.45198e-07	5.25461e-07	4.60312e-07	5.78432e-07	4.97411e-07	4.86385e-07	4.40591e-07	4.91004e-07	4.42895e-07	3.83885e-07	4.76535e-07	3.33688e-07	3.82144e-07	3.08e-07	1.58438e-07	-4.7896e-07	-5.06386e-07
2190.83	10.3889	8.57172e-07	8.04189e-07	7.60301e-07	7.52314e-07	7.57185e-07	7.85492e-07	7.79302e-07	7.75534e-07	8.41092e-07	7.69321e-07	6.23456e-07	7.26053e-07	7.67171e-07	7.37253e-07	8.46982e-07	4.1431e-07	1.08026e-06
2198.86	10.5417	2.12881e-07	3.40208e-07	1.66069e-07	2.0127e-07	1.47548e-07	1.68514e-07	2.30981e-07	1.3018e-07	2.14371e-07	2.53624e-07	1.5133e-07	6.20367e-08	1.89253e-07	1.93477e-07	1.90944e-07	1.48288e-07	2.58939e-07
2206.59	10.1254	1.66465e-07	7.70842e-08	2.14979e-07	7.24653e-08	1.26408e-07	1.41128e-07	1.38133e-07	9.474e-08	1.36269e-07	1.73929e-07	1.99434e-07	9.57312e-08	1.32811e-07	1.43108e-07	1.5547e-07	9.08566e-08	2.48325e-07
2214.33	10.3834	2.62733e-07	1.87905e-07	2.96273e-07	1.58271e-07	3.12728e-07	2.91909e-07	3.49968e-07	1.78404e-07	2.95095e-07	2.47025e-07	2.29809e-07	3.61357e-07	2.53904e-07	2.50304e-07	2.36388e-07	1.36168e-07	2.1852e-07
2222.15	10.1301	2.05893e-07	1.76571e-07	2.72884e-07	1.59264e-07	2.22149e-07	1.47425e-07	1.5995e-07	1.76231e-07	1.60201e-07	2.61942e-07	3.7401e-07	1.16522e-07	1.85427e-07	1.69324e-07	1.88805e-07	7.88132e-08	2.18802e-07
2229.74	10.3142	1.31382e-07	2.66497e-07	1.68653e-07	1.35345e-07	1.75125e-07	3.7651e-08	1.02611e-07	1.49215e-07	1.16151e-07	6.0622e-08	1.85863e-07	1.16815e-07	1.06233e-07	1.10911e-07	1.29185e-07	3.42297e-08	1.4172e-07
2237.62	10.273	2.22746e-08	0	5.13501e-08	0	9.714e-09	1.59006e-23	3.69925e-08	8.74197e-09	4.64402e-08	0	1.25257e-08	2.19837e-08	2.69626e-08	5.19584e-08	9.01225e-09	1.82612e-08	1.04391e-08
2245.2	10.1004	6.82469e-08	0	3.47752e-08	3.87261e-08	9.6023e-08	3.22657e-08	1.25751e-07	3.39032e-08	3.7614e-08	8.60932e-08	5.25659e-08	5.50036e-08	5.65408e-08	5.43387e-08	5.72675e-08	1.86123e-08	4.88989e-08
2252.83	10.165	2.084e-07	6.30242e-24	9.58978e-08	2.19017e-07	2.83034e-07	1.70571e-07	1.79103e-07	3.50081e-07	1.94259e-07	1.60316e-07	8.6257e-08	1.68918e-07	1.52089e-07	1.84413e-07	1.66044e-07	1.14866e-07	5.55896e-08
2260.58	10.1894	1.43834e-07	2.30323e-07	1.87529e-07	1.23494e-07	1.14363e-07	1.27712e-07	4.88077e-08	1.60605e-07	1.24671e-07	5.20455e-08	1.70086e-07	1.16358e-07	1.13562e-07	9.99322e-08	1.34316e-07	1.0982e-07	8.54069e-08
2268.02	9.94387	8.18061e-08	1.21088e-07	1.11934e-07	5.34074e-08	1.03609e-23	1.72036e-08	1.25337e-07	1.15916e-08	1.00506e-07	3.44859e-08	2.98961e-08	3.54908e-08	4.31877e-08	3.8012e-08	1.73773e-08	4.14731e-08	-1.04475e-08
2275.74	10.1886	8.97409e-08	1.11987e-07	4.09274e-08	4.64289e-08	1.87756e-07	6.48604e-08	8.15766e-08	8.51489e-09	1.03656e-07	1.20158e-08	3.58181e-08	5.65127e-08	6.74645e-08	1.00735e-07	1.06483e-07	1.05056e-07	3.27529e-08
2283.2	9.78521	6.65539e-08	-6.0046e-09	1.40289e-08	1.65113e-08	6.02967e-08	4.9151e-08	4.29345e-08	5.55549e-09	9.42531e-08	-2.27836e-08	1.62166e-08	3.77578e-08	4.15019e-08	3.37774e-08	1.87775e-08	1.44887e-08	-4.13597e-08
2290.54	10.0038	1.33065e-08	0	0	0	0	0	4.05486e-09	0	4.51731e-09	0	1.46709e-08	2.78004e-08	1.8333e-08	2.14838e-08	3.48629e-09	-4.42781e-10	2.19005e-08
2298.27	9.97127	1.06115e-08	-3.69394e-09	0	0	0	0	0	0	2.40319e-09	-5.42345e-08	7.51107e-09	6.73008e-09	3.56367e-09	2.6454e-08	1.57777e-08	-5.6467e-08	7.32118e-08
2305.44	9.63447	1.27831e-08	-6.02292e-09	-7.16344e-09	0	2.48721e-08	0	-1.2931e-08	-1.48354e-08	6.13711e-08	2.9175e-09	-1.84807e-09	7.32732e-10	5.4264e-09	9.30734e-09	4.7741e-08	2.18562e-08	1.55903e-23
2312.87	10.1359	0	0	-1.08779e-08	7.5736e-08	2.39779e-08	5.59648e-08	2.08886e-08	-1.41657e-08	5.05038e-08	0	-3.78015e-09	2.73152e-08	1.56853e-09	1.57073e-09	-1.00137e-08	-3.30561e-10	2.16795e-09
2320.56	9.74905	0	0	0	0	0	0	0	1.56058e-08	1.1112e-08	1.14743e-08	2.48814e-09	-2.84864e-09	-1.61905e-08	0	0	2.01736e-08	8.46297e-08
2327.54	9.65826	0	-4.45678e-24	0	0	0	0	0	0	-2.52582e-09	0	4.36141e-09	0	2.6928e-09	-5.51616e-09	7.12779e-24	0	0
2335.15	10.0542	0	-3.53803e-24	0	0	0	-4.92207e-08	0	0	-2.50464e-09	0	-5.64072e-09	1.79565e-08	3.38312e-09	0	-1.90799e-08	-4.22601e-08	8.32075e-08
2342.53	9.56876	0	0	0	0	0	0	0	0	9.30771e-09	1.30779e-08	0	5.5163e-09	6.94813e-09	0	-2.02419e-08	0	0
2349.51	9.55708	0	0	-5.85889e-09	0	-5.66657e-09	0	0	0	-2.3339e-09	2.23041e-08	1.49206e-08	-9.39256e-10	0	1.76303e-09	0	0	-2.99744e-08
2356.96	9.92805	0	-4.20613e-08	0	0	0	0	0	0	-2.49764e-09	-1.05504e-09	2.71155e-09	1.54353e-08	2.58757e-08	-9.76254e-10	0	-2.02077e-08	-1.76212e-08
2364.29	9.46855	0	-7.80864e-08	0	0	-1.76616e-09	0	0	-8.17473e-08	0	6.77749e-09	9.11953e-09	1.22451e-08	-6.05826e-09	5.43152e-09	0	-1.29373e-08	5.82978e-09
2371.27	9.49267	0	5.3651e-08	0	0	2.36587e-09	1.04178e-08	0	0	0	3.09483e-09	6.13111e-09	0	7.07929e-09	8.53966e-09	6.24096e-24	-1.25891e-08	4.13371e-09
2378.44	9.61255	0	4.06802e-08	0	-8.12292e-09	-4.34126e-09	0	0	-3.13206e-09	-1.17305e-08	0	-2.07161e-09	-1.98876e-24	0	-2.42039e-09	0	-3.34494e-08	-8.04858e-09
2385.73	9.63909	0	-4.69196e-09	0	2.25607e-24	4.16432e-09	0	0	3.50275e-09	6.534e-10	5.11043e-09	2.9837e-09	1.22681e-08	3.42119e-24	2.63078e-09	-1.92441e-08	0	-9.58833e-09
2392.76	9.29032	0	-2.95939e-09	2.98416e-08	7.89759e-25	0	0	5.98626e-09	-2.18477e-09	-2.40486e-09	4.11654e-09	-2.90322e-09	1.41762e-08	2.32198e-08	8.48183e-09	-2.74598e-08	3.97818e-08	-2.08907e-09
2399.73	9.60672	0	0	0	0	0	0	7.45569e-09	-5.50311e-09	3.55976e-09	2.7273e-09	-1.12921e-08	-4.25573e-09	1.34158e-08	2.2667e-24	3.40129e-09	2.44645e-08	1.40825e-07
2407.24	9.64439	2.56218e-08	9.99501e-09	0	1.37173e-08	0	0	3.16954e-25	5.71743e-08	0	4.2742e-09	5.29192e-09	3.7395e-09	1.12172e-08	0	3.49496e-09	0	1.40876e-08
2414.09	8.96147	0	0	0	0	5.1402e-09	0	4.72125e-09	0	0	0	9.49423e-09	7.24019e-09	2.58621e-08	0	3.88726e-08	0	1.51286e-08
2420.91	9.61238	0	0	9.82431e-08	0	0	7.68417e-09	1.08423e-08	0	7.1055e-09	6.03635e-09	-1.13094e-08	-1.59682e-08	1.18049e-08	-5.00325e-10	-2.75676e-08	2.98606e-09	1.52962e-08
2428.33	9.44559	0	0	0	0	3.0911e-09	7.17869e-09	6.16924e-09	0	1.56852e-08	2.46451e-09	0	4.91165e-09	2.78673e-08	1.18269e-08	2.09668e-08	-1.28861e-08	7.64298e-09
2435.22	9.3097	0	0	0	6.59253e-09	7.51556e-09	0	0	0	9.64599e-09	7.95734e-09	0	4.06207e-09	-1.86433e-09	2.19916e-08	3.71217e-09	3.10795e-08	-5.16757e-09
2442.07	8.81877	0	0	0	0	0	2.58555e-10	0	0	4.5134e-25	6.08431e-09	-4.94698e-09	2.093e-09	-1.64248e-09	-1.65744e-24	4.55462e-08	-5.83997e-09	-1.83822e-08
2448.81	9.38408	0	4.79067e-09	0	7.23454e-09	0	9.93428e-08	7.38359e-09	8.52215e-09	0	-7.82707e-24	2.09508e-08	2.91093e-09	0	0	5.26496e-08	1.85315e-09	-4.21286e-09
2456.2	9.35962	0	4.56204e-09	0	0	2.83696e-09	6.86061e-08	0	5.58074e-08	1.93777e-08	0	1.89726e-08	-3.55384e-24	2.88839e-08	2.30164e-08	2.35188e-08	8.2468e-09	2.15031e-09
2462.72	8.86375	0	3.18352e-08	1.68339e-08	0	2.766e-09	-1.63894e-09	1.22996e-08	5.08137e-08	1.15434e-08	2.71776e-08	8.14314e-09	1.45107e-08	2.12429e-08	1.08107e-08	1.78124e-08	-4.27365e-09	5.74771e-08
2469.32	9.10723	4.1312e-08	5.25171e-08	2.08447e-08	1.8239e-08	4.23022e-08	2.85319e-08	4.66396e-08	2.53068e-08	3.92726e-08	5.10651e-08	3.82784e-08	5.53432e-08	6.09435e-08	2.34957e-08	1.21274e-07	3.15033e-09	9.94492e-08
2476.64	9.57509	4.05446e-08	2.29979e-08	6.10118e-09	3.85408e-08	2.93447e-08	2.60361e-08	3.81327e-08	1.77706e-08	1.41925e-08	3.40477e-08	1.79267e-08	1.13541e-09	3.71578e-08	2.03335e-08	6.39457e-08	-1.96995e-08	2.98337e-08
2483.46	8.89409	3.45296e-06	3.81938e-06	3.84921e-06	3.83306e-06	3.88008e-06	3.87316e-06	3.89248e-06	3.92419e-06	3.97884e-06	4.06386e-06	4.13555e-06	4.19953e-06	4.29773e-06	4.39552e-06	5.32393e-06	7.08547e-06	9.56611e-06
2489.9	8.98538	4.0474e-06	4.25548e-06	4.21689e-06	4.21239e-06	4.27025e-06	4.24764e-06	4.24932e-06	4.29044e-06	4.37222e-06	4.40351e-06	4.47327e-06	4.53964e-06	4.659e-06	4.80719e-06	5.51885e-06	7.1777e-06	9.4215e-06
2496.76	9.439	1.78223e-06	1.81153e-06	1.78404e-06	1.8063e-06	1.82597e-06	1.80047e-06	1.77526e-06	1.78708e-06	1.78659e-06	1.7854e-06	1.81743e-06	1.82623e-06	1.83667e-06	1.86041e-06	1.98026e-06	2.32522e-06	2.59303e-06
