# Supplementary material for: Towards global carbon transparency: Spaceborne imaging spectroscopy enables precise CO2 emission quantification at facility scale
Source: Research Square preprint supplement (doi:10.21203/rs.3.rs-5913782/v1), 2025-01-29
Supplement: Supplementary file 19 [file CO2_k_v25.1.3.xlsx]

## Sheet: k_ZY1E
Wavelength	FWHM	k_Summer_L	k_Summer_M	k_Summer_H	k_Winter_L	k_Winter_M	k_Winter_H	k_1976_L	k_1976_M	k_1976_H
1005.6	16.26	0	0	0	0	0	0	0	0	0	0	0	0	0
1022.21	16.26	0	0	0	0	0	0	0	0	0	0	0	0	0
1039.19	16.26	3.41384e-07	3.29841e-07	3.17386e-07	3.09001e-07	3.08036e-07	3.04471e-07	2.93767e-07	2.7609e-07	2.7468e-07	2.62188e-07	2.59536e-07	2.43174e-07	2.21489e-07
1055.87	16.26	5.40524e-07	5.23282e-07	5.3874e-07	5.08515e-07	4.88703e-07	4.75265e-07	4.52126e-07	4.32903e-07	4.23262e-07	4.25713e-07	3.95252e-07	3.90552e-07	3.59929e-07
1072.55	16.26	6.5059e-08	5.03012e-08	5.55317e-08	5.12473e-08	4.41096e-08	3.99118e-08	5.61911e-08	3.21498e-08	3.13166e-08	4.21342e-08	4.14392e-08	3.10804e-08	4.16222e-08
1089.23	16.26	0	1.44773e-09	0	0	5.18486e-09	0	0	0	0	-1.52502e-09	0	0	-2.03544e-09
1105.91	16.26	0	4.78244e-10	0	0	0	0	-5.9802e-10	0	0	0	0	0	0
1122.59	16.26	0	0	3.20457e-10	0	-1.86139e-09	0	0	0	0	1.92451e-09	0	6.45247e-10	0
1139.44	16.26	0	0	0	0	1.29755e-09	0	0	0	0	2.74881e-10	0	0	0
1156.41	16.26	0	0	0	0	0	0	0	0	0	0	0	0	0
1173.29	16.26	0	0	0	0	0	0	0	0	0	0	0	0	0
1190.17	16.26	0	0	0	0	0	0	0	0	0	0	0	0	0
1207.04	16.26	2.37343e-05	2.31886e-05	2.2615e-05	2.20821e-05	2.14942e-05	2.0917e-05	2.03608e-05	1.97843e-05	1.91662e-05	1.84804e-05	1.78783e-05	1.71821e-05	1.65672e-05
1223.92	16.26	1.43668e-05	1.40155e-05	1.36376e-05	1.32762e-05	1.2924e-05	1.25757e-05	1.2186e-05	1.18258e-05	1.14221e-05	1.10467e-05	1.06075e-05	1.01935e-05	9.83929e-06
1240.8	16.26	3.45679e-07	3.87068e-07	3.53277e-07	3.53854e-07	3.23488e-07	3.28531e-07	3.32135e-07	3.08015e-07	3.03012e-07	2.71716e-07	2.83218e-07	2.571e-07	2.07163e-07
1257.4	16.26	1.7587e-07	1.52514e-07	1.45206e-07	1.82792e-07	1.41256e-07	1.25497e-07	1.29668e-07	1.87302e-07	1.40673e-07	1.38331e-07	1.56063e-07	1.17178e-07	1.50096e-07
1274.15	16.26	1.17085e-08	1.20601e-08	7.7973e-09	1.20805e-08	4.2806e-09	1.10696e-08	6.96173e-09	1.9625e-09	2.29287e-09	0	3.38737e-09	2.33405e-08	1.86035e-09
1290.9	16.26	1.41866e-06	1.36722e-06	1.34065e-06	1.26887e-06	1.24432e-06	1.21236e-06	1.19077e-06	1.15574e-06	1.11298e-06	1.08851e-06	9.9058e-07	9.25151e-07	9.60521e-07
1307.65	16.26	6.79719e-07	6.66067e-07	6.58215e-07	6.37725e-07	6.35787e-07	6.00457e-07	6.08295e-07	5.68819e-07	5.69238e-07	5.39972e-07	5.32425e-07	4.84715e-07	4.69673e-07
1324.4	16.26	1.78771e-06	1.73309e-06	1.67565e-06	1.62314e-06	1.58997e-06	1.54591e-06	1.49741e-06	1.42467e-06	1.33325e-06	1.3417e-06	1.25125e-06	1.31686e-06	1.13527e-06
1341.16	16.26	2.29712e-06	2.2064e-06	2.15763e-06	2.13139e-06	2.01326e-06	1.98469e-06	1.89544e-06	1.88358e-06	1.84198e-06	1.73801e-06	1.66471e-06	1.60964e-06	1.56472e-06
1357.91	16.26	2.1052e-08	6.74529e-08	2.16985e-08	7.97395e-09	2.74167e-08	1.59137e-08	2.57724e-08	1.58978e-08	2.00409e-08	3.59008e-08	2.25983e-08	1.54289e-08	1.44088e-08
1374.87	16.26	1.161e-07	1.01689e-07	1.19394e-07	8.35344e-08	1.3771e-07	1.10174e-07	1.5715e-07	1.08412e-07	1.19917e-07	1.20817e-07	1.10986e-07	1.10539e-07	1.11872e-07
1391.65	16.26	2.4345e-09	4.90012e-09	4.53733e-10	5.70344e-10	0	0	8.09057e-09	0	6.36022e-09	2.77115e-09	3.39089e-09	1.08786e-08	1.96842e-09
1408.49	16.26	7.35154e-09	-1.68068e-09	0	2.21395e-09	0	0	0	0	1.55873e-09	0	4.35252e-10	5.46418e-10	0
1425.33	16.26	2.49446e-05	2.47581e-05	2.45077e-05	2.42703e-05	2.40272e-05	2.37592e-05	2.33705e-05	2.30766e-05	2.26984e-05	2.22203e-05	2.17572e-05	2.12673e-05	2.07493e-05
1442.17	16.26	0.000114964	0.000112436	0.000109876	0.000107082	0.000104283	0.00010142	9.8464e-05	9.5463e-05	9.22533e-05	8.88695e-05	8.54548e-05	8.19796e-05	7.84986e-05
1459.01	16.26	7.54085e-07	7.09621e-07	6.63857e-07	6.50378e-07	5.78939e-07	6.16197e-07	5.16929e-07	4.55572e-07	5.13556e-07	4.50172e-07	4.22622e-07	4.21902e-07	3.80562e-07
1475.85	16.26	8.12997e-06	8.00557e-06	7.83771e-06	7.65204e-06	7.5878e-06	7.35155e-06	7.1959e-06	6.93517e-06	6.82506e-06	6.62308e-06	6.39028e-06	6.16914e-06	5.9545e-06
1492.7	16.26	1.81625e-06	1.79274e-06	1.77286e-06	1.66207e-06	1.60202e-06	1.54851e-06	1.5197e-06	1.47691e-06	1.39075e-06	1.375e-06	1.28396e-06	1.25873e-06	1.18698e-06
1509.54	16.26	3.2909e-08	3.50647e-08	4.18077e-08	3.18986e-08	3.58934e-08	3.38351e-08	4.30879e-08	1.80264e-08	2.18112e-08	2.03591e-08	1.39582e-08	1.41329e-08	2.0018e-08
1526.38	16.26	5.4741e-06	5.33414e-06	5.16519e-06	5.07814e-06	4.85676e-06	4.70598e-06	4.55718e-06	4.33248e-06	4.14254e-06	4.04614e-06	3.82745e-06	3.64983e-06	3.4736e-06
1543.22	16.26	1.66923e-05	1.63358e-05	1.5919e-05	1.54925e-05	1.51196e-05	1.46913e-05	1.42848e-05	1.37938e-05	1.33919e-05	1.29544e-05	1.24268e-05	1.19368e-05	1.14308e-05
1560.06	16.26	7.06972e-07	6.78011e-07	6.99966e-07	5.83133e-07	6.32703e-07	5.57014e-07	5.91704e-07	5.68254e-07	5.95148e-07	3.87517e-07	4.63826e-07	4.47482e-07	4.17088e-07
1576.9	16.26	0.000141938	0.000138554	0.000135089	0.000131592	0.000128022	0.000124416	0.000120849	0.000117022	0.000113147	0.000108949	0.000104678	0.000100364	9.59532e-05
1593.71	16.26	1.54421e-05	1.49856e-05	1.45827e-05	1.41513e-05	1.37223e-05	1.32635e-05	1.28767e-05	1.24451e-05	1.19859e-05	1.14561e-05	1.09553e-05	1.04547e-05	9.93408e-06
1610.39	16.26	0.000112474	0.000109735	0.000106942	0.00010415	0.000101254	9.83521e-05	9.5474e-05	9.2573e-05	8.93598e-05	8.59902e-05	8.25327e-05	7.9026e-05	7.54526e-05
1627.13	16.26	3.28886e-06	3.18929e-06	3.07203e-06	2.99094e-06	2.9072e-06	2.77401e-06	2.74244e-06	2.64333e-06	2.46196e-06	2.35037e-06	2.23222e-06	2.12175e-06	1.99796e-06
1644.01	16.26	2.56719e-05	2.51163e-05	2.44675e-05	2.38764e-05	2.33461e-05	2.26446e-05	2.20528e-05	2.14559e-05	2.0703e-05	1.99347e-05	1.91699e-05	1.83726e-05	1.75476e-05
1660.89	16.26	2.65137e-06	2.56086e-06	2.4311e-06	2.30885e-06	2.31365e-06	2.22066e-06	2.08464e-06	2.04384e-06	1.94391e-06	1.83909e-06	1.77506e-06	1.66295e-06	1.58039e-06
1677.77	16.26	2.90402e-07	2.249e-07	2.74474e-07	2.59914e-07	1.9987e-07	2.99484e-07	3.84453e-07	2.09983e-07	2.14507e-07	1.98699e-07	1.96407e-07	1.86394e-07	1.88035e-07
1694.65	16.26	2.12288e-08	0	2.72739e-08	4.94005e-08	6.66347e-09	2.56077e-08	8.45171e-09	1.05177e-08	1.68311e-08	1.78004e-08	1.92907e-08	2.04068e-08	5.47037e-09
1711.53	16.26	0	3.92081e-08	5.78052e-08	0	2.98817e-08	0	4.36013e-09	8.15796e-09	1.22175e-08	2.56374e-08	1.33877e-08	-4.02352e-09	-1.30159e-10
1728.41	16.26	-8.19923e-25	8.82707e-09	0	6.48284e-09	3.55072e-09	8.08299e-09	6.39361e-10	6.16721e-09	4.05189e-09	-9.37951e-09	5.25167e-09	-8.7055e-10	3.47667e-09
1745.28	16.26	0	1.05487e-08	0	0	-3.81625e-09	1.47101e-08	-1.15319e-09	1.29351e-09	4.01402e-09	4.86472e-09	0	1.75059e-24	0
1762.16	16.26	7.45871e-08	1.08926e-07	1.33376e-07	1.47268e-07	4.07405e-08	1.52208e-07	8.59046e-08	8.03549e-08	9.03159e-08	7.83383e-08	8.90545e-08	6.49175e-08	4.70185e-08
1778.85	16.26	1.34037e-08	7.06479e-10	1.01401e-09	1.69548e-08	2.94372e-09	1.30096e-08	8.03357e-09	1.02319e-08	1.97013e-08	1.24573e-08	2.214e-08	3.36765e-08	7.80791e-09
1795.43	16.26	1.2581e-07	5.409e-08	1.12139e-07	2.83621e-08	4.24589e-08	6.05907e-08	4.21268e-08	5.17616e-08	5.37143e-08	3.94474e-08	6.99456e-08	3.71847e-08	4.86117e-08
1812.02	16.26	6.44761e-10	0	9.84753e-10	1.22809e-09	8.33992e-09	1.22811e-08	2.47253e-09	1.64164e-08	1.7476e-09	1.18038e-08	8.26307e-09	0	1.32641e-08
1828.82	16.26	0	0	0	0	0	0	0	0	0	0	0	0	0
1845.62	16.26	0	0	0	0	2.11066e-09	0	0	0	0	0	0	0	0
1862.42	16.26	2.47381e-08	7.08991e-09	3.07207e-08	7.47211e-09	3.83068e-08	7.70088e-09	3.35637e-08	4.8438e-08	8.03307e-09	4.82619e-08	8.73294e-09	1.12071e-08	9.6593e-09
1880.13	16.26	3.22485e-05	3.19212e-05	3.15776e-05	3.12285e-05	3.08073e-05	3.03074e-05	2.97068e-05	2.90498e-05	2.82875e-05	2.74996e-05	2.65064e-05	2.5542e-05	2.44736e-05
1896.11	16.26	2.50102e-06	2.48304e-06	2.4212e-06	2.36731e-06	2.29652e-06	2.22324e-06	2.28435e-06	2.11767e-06	2.04791e-06	2.01935e-06	1.90859e-06	1.85568e-06	1.73131e-06
1912.97	16.26	3.42482e-07	3.22966e-07	3.40513e-07	3.27984e-07	3.01444e-07	3.52546e-07	3.22137e-07	3.10206e-07	2.55151e-07	2.99808e-07	2.10956e-07	3.02753e-07	1.97532e-07
1929.93	16.26	9.17864e-07	8.46307e-07	8.30321e-07	7.80694e-07	7.27518e-07	6.77145e-07	6.7823e-07	6.24085e-07	6.21096e-07	5.3216e-07	4.92553e-07	4.28229e-07	4.65215e-07
1946.82	16.26	0.000382661	0.000372032	0.000361137	0.000349879	0.000338297	0.000326519	0.000314315	0.000301386	0.000287642	0.00027278	0.000256988	0.000240881	0.00022446
1963.72	16.26	0.000793793	0.000774172	0.000754041	0.000733349	0.000711957	0.000690045	0.000667362	0.00064313	0.000616973	0.000588191	0.000557318	0.000525088	0.000492151
1980.61	16.26	8.90604e-05	8.66356e-05	8.42486e-05	8.176e-05	7.92622e-05	7.67046e-05	7.41097e-05	7.13737e-05	6.84104e-05	6.51369e-05	6.16751e-05	5.8024e-05	5.42626e-05
1997.51	16.26	0.000536201	0.000529017	0.000521396	0.000513288	0.00050455	0.000495177	0.000485014	0.000473721	0.000460982	0.000446369	0.000429632	0.000411447	0.000391895
2014.4	16.26	0.00180977	0.00175814	0.00170544	0.00165136	0.00159573	0.00153864	0.00147948	0.00141658	0.00134912	0.00127563	0.00119685	0.00111562	0.00103367
2031.3	16.26	0.00028476	0.000276456	0.000268159	0.000259773	0.00025127	0.000242806	0.000234153	0.000225029	0.000215221	0.000204384	0.000192889	0.00018099	0.000168427
2048.13	16.26	0.000463691	0.000452711	0.000441545	0.00043016	0.000418463	0.000406627	0.00039441	0.000381387	0.000367135	0.00035125	0.000333958	0.000315732	0.000296366
2064.9	16.26	0.000629136	0.000613128	0.000596912	0.000580346	0.000563475	0.00054644	0.000528863	0.000510147	0.000489779	0.000467171	0.000442688	0.000416942	0.00038972
2081.61	16.26	0.00026743	0.000259946	0.00025245	0.000244884	0.000237188	0.000229478	0.000221673	0.000213342	0.000204419	0.000194422	0.000183853	0.000172645	0.000160841
2098.45	16.26	6.23657e-05	6.05284e-05	5.86973e-05	5.68641e-05	5.50019e-05	5.31783e-05	5.13144e-05	4.93378e-05	4.72753e-05	4.4913e-05	4.25605e-05	3.98826e-05	3.71241e-05
2115.29	16.26	1.73233e-05	1.69592e-05	1.65356e-05	1.61131e-05	1.56692e-05	1.51794e-05	1.47195e-05	1.42699e-05	1.37046e-05	1.31283e-05	1.24618e-05	1.17505e-05	1.11134e-05
2132.13	16.26	1.69909e-06	1.60993e-06	1.5615e-06	1.50113e-06	1.47325e-06	1.41402e-06	1.37045e-06	1.31035e-06	1.23793e-06	1.19589e-06	1.08631e-06	1.01918e-06	9.62025e-07
2148.97	16.26	1.22763e-05	1.20337e-05	1.17626e-05	1.15046e-05	1.12209e-05	1.09587e-05	1.0689e-05	1.04046e-05	1.00463e-05	9.68567e-06	9.2307e-06	8.85488e-06	8.2793e-06
2165.81	16.26	8.91469e-06	8.69945e-06	8.49915e-06	8.28982e-06	8.08385e-06	7.8728e-06	7.64733e-06	7.39158e-06	7.17675e-06	6.84907e-06	6.56949e-06	6.2059e-06	5.79315e-06
2182.64	16.26	7.39306e-07	7.13155e-07	6.93222e-07	6.85861e-07	6.22408e-07	6.52429e-07	6.48886e-07	5.82561e-07	6.03322e-07	5.56741e-07	5.21407e-07	4.87016e-07	4.12302e-07
2199.48	16.26	1.75381e-07	1.73504e-07	1.56403e-07	1.47072e-07	1.52757e-07	1.46495e-07	1.43503e-07	1.23216e-07	1.39323e-07	1.26917e-07	1.38325e-07	1.38864e-07	1.53826e-07
2216.32	16.26	1.93925e-07	1.97211e-07	1.7362e-07	1.99227e-07	1.77056e-07	2.31591e-07	1.44962e-07	1.45327e-07	1.59057e-07	1.62676e-07	1.3415e-07	3.80834e-08	6.14471e-08
2233.16	16.26	7.78744e-08	8.2464e-08	4.24639e-08	8.56376e-08	6.1863e-08	4.84536e-08	4.26015e-08	7.90142e-08	6.90382e-08	1.91362e-08	2.58858e-08	5.32623e-08	3.43838e-08
2250	16.26	1.43498e-07	1.16028e-07	1.21022e-07	1.25398e-07	9.0199e-08	1.00743e-07	9.25536e-08	7.80055e-08	1.1555e-07	3.65455e-08	9.46358e-08	7.00025e-08	1.01878e-07
2266.84	16.26	4.93092e-08	4.80322e-08	5.64419e-08	1.48854e-08	6.49622e-08	1.28191e-08	1.69426e-08	3.19358e-08	3.05595e-08	8.69967e-08	2.57822e-08	2.92159e-08	5.054e-08
2283.67	16.26	1.24583e-08	5.72192e-08	1.36106e-08	3.44384e-08	1.37131e-08	1.82069e-08	1.56066e-08	2.25137e-08	2.01096e-09	4.99433e-08	1.86891e-08	4.81404e-08	-2.99339e-08
2300.51	16.26	3.43853e-24	2.02978e-08	7.85155e-09	5.71807e-09	0	-8.08478e-09	0	0	6.45412e-09	0	0	0	0
2317.35	16.26	0	0	0	-5.68248e-25	-7.47308e-09	1.05091e-08	0	0	0	0	-1.63605e-08	0	0
2334.19	16.26	3.57406e-09	0	0	0	9.67568e-09	0	0	0	0	0	0	-2.74142e-08	-8.01473e-09
2350.4	16.26	3.38819e-09	0	0	0	0	0	0	0	0	0	0	0	4.68928e-09
2366.68	16.26	1.37169e-09	1.15018e-08	1.09074e-08	0	0	0	8.59669e-09	0	0	-7.50455e-09	-8.84945e-09	-1.22837e-08	4.65109e-09
2384.12	16.26	0	0	8.77385e-09	4.18738e-09	4.1643e-09	0	8.77973e-09	0	0	0	0	0	1.70871e-08
2400.81	16.26	-1.84491e-09	0	1.30701e-08	0	0	0	0	0	0	0	0	0	-2.01988e-09
2417.5	16.26	-2.07754e-09	1.50122e-08	0	2.8923e-09	3.39505e-09	4.65767e-09	0	0	9.33626e-09	0	0	0	-5.45361e-09
2434.19	16.26	4.25985e-09	4.74809e-09	9.49836e-09	0	0	0	0	4.8409e-09	-1.99195e-08	0	1.10341e-23	0	-3.78168e-09
2450.88	16.26	0	0	0	0	0	0	1.1587e-23	5.12699e-09	0	2.45844e-08	0	0	-5.4275e-09
2467.57	16.26	6.6053e-09	2.7945e-08	2.83882e-08	2.48502e-08	5.94636e-08	3.09581e-08	4.52936e-08	1.58022e-08	8.83543e-09	5.6328e-08	1.92901e-09	1.6163e-08	1.89306e-08
2484.32	16.26	2.39345e-06	2.36347e-06	2.29841e-06	2.23645e-06	2.15353e-06	2.08706e-06	1.93035e-06	1.97735e-06	1.79689e-06	1.73222e-06	1.65421e-06	1.50533e-06	1.39229e-06
2501.08	16.26	1.3329e-06	1.22972e-06	1.23035e-06	1.20816e-06	1.23529e-06	1.07372e-06	1.11266e-06	9.98905e-07	1.04733e-06	9.52372e-07	9.41673e-07	8.42753e-07	7.6931e-07

## Sheet: k_ZY1F
Wavelength	FWHM	k_Summer_L	k_Summer_M	k_Summer_H	k_Winter_L	k_Winter_M	k_Winter_H	k_1976_L	k_1976_M	k_1976_H
1009.7	16.848	0	0	0	0	0	0	0	0	0	0	0	0	0
1026.55	16.846	0	0	0	0	0	0	0	0	0	0	0	0	0
1043.4	16.846	3.76134e-07	3.6279e-07	3.53195e-07	3.50875e-07	3.3866e-07	3.27359e-07	3.21526e-07	3.01549e-07	3.08787e-07	2.92059e-07	2.76213e-07	2.65088e-07	2.40921e-07
1060.24	16.849	2.02896e-07	1.97747e-07	2.06855e-07	1.90147e-07	1.87633e-07	1.64138e-07	1.71536e-07	1.52043e-07	1.55338e-07	1.70944e-07	1.41362e-07	1.43022e-07	1.35868e-07
1077.09	16.845	2.2098e-08	1.51248e-08	1.6203e-08	1.83614e-08	1.71477e-08	5.35404e-09	1.67879e-08	7.33995e-09	7.5781e-09	7.79392e-09	1.42943e-08	3.33689e-09	1.01073e-08
1093.94	16.845	0	3.05858e-09	0	0	7.7166e-09	0	-1.685e-09	0	0	-4.03845e-09	0	0	0
1110.78	16.848	0	2.04405e-09	1.09039e-10	0	1.64462e-09	0	2.07022e-09	0	0	8.68401e-10	0	0	0
1127.63	16.848	0	0	0	0	4.25475e-09	0	0	0	0	4.76254e-10	0	3.63818e-09	0
1144.48	16.845	0	0	0	0	0	0	0	0	0	0	0	0	0
1161.32	16.849	0	0	0	0	0	0	0	0	0	0	0	0	0
1178.17	16.845	0	0	0	0	0	0	0	0	0	0	0	0	0
1195.02	16.848	7.90835e-08	7.58219e-08	7.3631e-08	7.18191e-08	7.05556e-08	6.69956e-08	6.55535e-08	6.17516e-08	6.17887e-08	5.78682e-08	5.50411e-08	5.12439e-08	4.82419e-08
1211.86	16.845	1.45301e-05	1.41832e-05	1.38062e-05	1.34819e-05	1.30908e-05	1.27198e-05	1.23886e-05	1.20312e-05	1.16119e-05	1.11549e-05	1.08301e-05	1.03405e-05	9.99425e-06
1228.71	16.848	5.32698e-06	5.18062e-06	5.02508e-06	4.88321e-06	4.74421e-06	4.62265e-06	4.43885e-06	4.30315e-06	4.15667e-06	3.99109e-06	3.81701e-06	3.67974e-06	3.54306e-06
1245.56	16.848	1.10494e-07	1.45558e-07	1.2786e-07	1.13762e-07	1.00297e-07	1.03061e-07	1.15078e-07	1.24139e-07	1.11349e-07	9.53551e-08	9.2277e-08	9.55266e-08	9.66769e-08
1262.4	16.846	1.82277e-07	1.62944e-07	1.6117e-07	2.10043e-07	1.61619e-07	1.30479e-07	1.53293e-07	1.80478e-07	1.14255e-07	1.51093e-07	1.62988e-07	1.80887e-07	1.1544e-07
1279.25	16.845	1.47997e-08	1.51744e-08	1.16941e-08	2.15032e-08	6.39592e-09	1.35779e-08	1.05597e-08	7.33699e-09	4.96946e-09	2.01372e-09	1.26302e-24	6.08573e-09	1.94482e-09
1296.09	16.849	1.17342e-06	1.1452e-06	1.11087e-06	1.04441e-06	1.03348e-06	9.86688e-07	9.6881e-07	9.72475e-07	9.29512e-07	8.8574e-07	8.09581e-07	7.88233e-07	7.85288e-07
1312.94	16.845	3.69542e-06	3.59995e-06	3.51643e-06	3.41556e-06	3.33242e-06	3.25214e-06	3.17303e-06	3.05572e-06	2.96494e-06	2.88295e-06	2.76424e-06	2.67255e-06	2.52667e-06
1329.79	16.846	3.3803e-07	3.01097e-07	3.07793e-07	2.81528e-07	2.80213e-07	3.00132e-07	3.00806e-07	2.72669e-07	2.15311e-07	2.43533e-07	2.34742e-07	2.68771e-07	1.96118e-07
1346.63	16.848	1.41002e-06	1.38741e-06	1.32648e-06	1.28783e-06	1.17627e-06	1.15268e-06	1.09589e-06	1.04932e-06	1.06035e-06	9.54087e-07	9.21707e-07	8.57889e-07	8.2925e-07
1363.48	16.848	3.86873e-08	2.98899e-08	2.44604e-08	3.12526e-08	3.04712e-08	4.35382e-08	3.72398e-08	2.79034e-08	2.72105e-08	3.58451e-08	3.49429e-08	3.14604e-08	3.94552e-08
1380.33	16.845	6.13112e-08	4.58104e-08	5.67304e-08	3.54527e-08	5.93436e-08	4.81104e-08	7.82399e-08	5.7874e-08	5.53687e-08	5.81287e-08	4.89993e-08	5.62707e-08	4.95493e-08
1397.17	16.848	9.39585e-09	3.72179e-10	2.03066e-09	1.21643e-09	0	0	2.18379e-09	0	5.45297e-09	2.80219e-10	2.63253e-09	3.05121e-09	0
1414.02	16.848	1.27214e-09	4.25296e-09	7.99768e-10	0	0	0	2.75118e-10	0	0	0	1.62171e-09	3.08719e-09	0
1430.87	16.845	0.000129911	0.000128583	0.000127131	0.000125518	0.000123853	0.000121959	0.000119868	0.000117766	0.000115345	0.000112652	0.000109846	0.000106895	0.00010383
1447.71	16.846	3.78768e-05	3.69296e-05	3.59995e-05	3.49672e-05	3.3881e-05	3.28708e-05	3.17888e-05	3.07364e-05	2.95486e-05	2.83523e-05	2.71353e-05	2.5909e-05	2.46767e-05
1464.56	16.846	7.98778e-07	7.90779e-07	7.46256e-07	7.20769e-07	7.07531e-07	7.5277e-07	6.86784e-07	6.53464e-07	6.78334e-07	6.31049e-07	6.04797e-07	5.9935e-07	5.74644e-07
1481.41	16.846	4.47226e-06	4.37159e-06	4.23051e-06	4.18904e-06	4.13718e-06	3.97408e-06	3.86588e-06	3.71511e-06	3.65159e-06	3.51687e-06	3.42615e-06	3.27955e-06	3.15803e-06
1498.25	16.849	2.00794e-06	2.00893e-06	1.93961e-06	1.8712e-06	1.81828e-06	1.80637e-06	1.74235e-06	1.68676e-06	1.60826e-06	1.52435e-06	1.49568e-06	1.44366e-06	1.36861e-06
1515.1	16.844	1.68707e-08	5.10036e-08	1.16934e-08	3.78353e-08	1.34917e-08	3.78077e-08	2.18401e-08	3.489e-08	2.455e-09	1.88925e-08	1.49499e-08	1.38779e-08	1.641e-08
1531.94	16.848	1.91809e-05	1.87235e-05	1.82256e-05	1.7781e-05	1.72696e-05	1.67395e-05	1.62982e-05	1.56794e-05	1.51808e-05	1.46846e-05	1.40495e-05	1.34736e-05	1.28692e-05
1548.79	16.848	4.08003e-06	4.00603e-06	3.86313e-06	3.75795e-06	3.666e-06	3.54695e-06	3.50436e-06	3.32219e-06	3.17584e-06	3.07187e-06	2.95161e-06	2.82204e-06	2.69387e-06
1565.64	16.846	3.93943e-05	3.83511e-05	3.73537e-05	3.62689e-05	3.52331e-05	3.4111e-05	3.31378e-05	3.21097e-05	3.08473e-05	2.95742e-05	2.83968e-05	2.71599e-05	2.58838e-05
1582.49	16.845	7.33179e-05	7.15277e-05	6.97218e-05	6.78337e-05	6.59738e-05	6.41011e-05	6.22108e-05	6.01069e-05	5.81795e-05	5.59393e-05	5.37044e-05	5.14542e-05	4.91489e-05
1599.33	16.848	8.71436e-05	8.50134e-05	8.29261e-05	8.0724e-05	7.85454e-05	7.63161e-05	7.41076e-05	7.1771e-05	6.9304e-05	6.67367e-05	6.40611e-05	6.13579e-05	5.85921e-05
1616.18	16.846	4.49226e-05	4.36687e-05	4.24241e-05	4.11773e-05	3.98822e-05	3.85714e-05	3.73422e-05	3.60694e-05	3.47259e-05	3.32408e-05	3.17775e-05	3.02941e-05	2.87853e-05
1633.03	16.846	4.91398e-06	4.76597e-06	4.67381e-06	4.51687e-06	4.40451e-06	4.22972e-06	4.18319e-06	4.12396e-06	3.85456e-06	3.69963e-06	3.54578e-06	3.3934e-06	3.21319e-06
1649.87	16.848	2.04998e-05	2.00292e-05	1.9491e-05	1.90002e-05	1.85615e-05	1.79771e-05	1.75426e-05	1.69643e-05	1.64415e-05	1.58346e-05	1.52028e-05	1.45614e-05	1.39019e-05
1666.72	16.845	1.52008e-06	1.46958e-06	1.41844e-06	1.2694e-06	1.34967e-06	1.28716e-06	1.21652e-06	1.20126e-06	1.1237e-06	1.07092e-06	1.0355e-06	9.62939e-07	9.42861e-07
1683.56	16.849	8.98915e-08	7.33867e-08	1.68087e-07	1.14839e-07	1.02352e-07	1.58116e-07	2.12217e-07	1.15609e-07	9.23386e-08	8.85714e-08	8.8259e-08	1.09893e-07	8.14069e-08
1700.41	16.845	1.11617e-08	1.63552e-08	2.23913e-08	2.16746e-08	0	1.09348e-08	4.58913e-10	3.9682e-09	7.66257e-09	1.19396e-08	6.76743e-09	8.08682e-09	-9.25962e-09
1717.26	16.846	-3.89738e-25	1.55461e-08	1.32387e-08	0	2.6559e-08	0	4.2995e-09	4.44592e-09	1.64146e-08	1.57207e-08	1.06231e-08	-1.0028e-08	-4.55347e-10
1734.1	16.849	0	1.19034e-08	0	2.68697e-09	1.72833e-08	2.74848e-09	1.77208e-09	7.73085e-09	1.21599e-09	-5.60625e-09	1.4209e-09	-5.82888e-10	2.50919e-09
1750.95	16.845	8.05008e-08	6.24653e-08	5.44455e-08	2.67654e-08	5.67835e-08	1.3281e-07	6.32934e-08	5.58926e-08	6.00382e-08	4.95209e-08	4.73316e-08	3.23073e-08	4.22581e-08
1767.8	16.845	3.93519e-08	4.02055e-08	8.92647e-08	1.49643e-07	3.931e-08	7.86648e-08	5.49377e-08	3.85396e-08	5.45505e-08	3.77471e-08	5.39678e-08	4.62e-08	2.25702e-08
1784.64	16.849	9.76323e-08	4.15506e-08	6.16272e-08	5.37754e-08	1.69785e-08	1.05919e-07	6.19296e-08	5.9503e-08	6.2353e-08	7.09207e-08	4.97163e-08	8.10487e-08	3.49102e-08
1801.49	16.845	4.38707e-08	2.39714e-08	5.91767e-08	1.54427e-08	3.58159e-08	2.13458e-08	2.92958e-08	2.92022e-08	3.28317e-08	3.40644e-08	4.08996e-08	1.4945e-08	4.73595e-09
1818.34	16.846	4.29498e-10	0	3.67041e-09	0	0	0	0	3.34796e-09	1.14736e-08	0	1.84638e-09	0	2.43781e-09
1835.18	16.849	0	0	0	0	0	0	0	0	0	0	0	0	0
1852.03	16.846	0	0	0	0	1.41289e-09	0	0	0	0	1.05255e-08	0	0	0
1868.88	16.845	7.0169e-07	6.61084e-07	7.06449e-07	6.84672e-07	7.29157e-07	7.07981e-07	7.7299e-07	7.79202e-07	7.45501e-07	7.88044e-07	7.44354e-07	7.67919e-07	7.89895e-07
1885.72	16.848	2.34231e-05	2.32161e-05	2.29386e-05	2.2721e-05	2.24331e-05	2.2072e-05	2.1649e-05	2.12083e-05	2.06686e-05	2.01266e-05	1.94801e-05	1.87792e-05	1.80632e-05
1902.57	16.845	7.3521e-07	7.75128e-07	7.16128e-07	7.15198e-07	6.3562e-07	6.13838e-07	6.55442e-07	5.38395e-07	5.60724e-07	6.04503e-07	5.70566e-07	4.99144e-07	5.1909e-07
1919.41	16.848	2.87185e-07	2.78096e-07	2.93542e-07	2.51604e-07	2.66876e-07	2.67922e-07	2.61486e-07	2.392e-07	1.77617e-07	2.50515e-07	2.22679e-07	1.40155e-07	1.1183e-07
1936.26	16.849	2.26544e-05	2.15596e-05	2.05081e-05	1.94544e-05	1.84203e-05	1.73723e-05	1.63766e-05	1.5351e-05	1.42428e-05	1.31939e-05	1.20756e-05	1.09673e-05	9.94503e-06
1953.11	16.845	0.000823077	0.000803776	0.000783719	0.000762773	0.000740914	0.000718283	0.00069459	0.000669081	0.000641645	0.000611499	0.000579017	0.000545412	0.000510972
1969.96	16.845	0.000506778	0.000494402	0.000481741	0.000468731	0.000455362	0.000441756	0.000427753	0.000412797	0.000396657	0.000378828	0.000359683	0.00033968	0.000318925
1986.8	16.846	3.66821e-05	3.5592e-05	3.46094e-05	3.35615e-05	3.25326e-05	3.14808e-05	3.04e-05	2.9268e-05	2.80561e-05	2.67146e-05	2.53125e-05	2.38294e-05	2.22811e-05
2003.65	16.846	0.00172688	0.00168763	0.00164674	0.00160392	0.00155889	0.00151154	0.00146138	0.00140732	0.0013483	0.00128319	0.00121183	0.00113728	0.00106172
2020.49	16.848	0.000995177	0.000969996	0.000944265	0.000917866	0.0008906	0.000862747	0.00083386	0.000802853	0.000769326	0.000732266	0.000692231	0.000650302	0.000606797
2037.34	16.846	0.000230856	0.000225089	0.000219295	0.000213416	0.00020741	0.000201406	0.000195237	0.000188686	0.000181578	0.000173662	0.000165111	0.000156194	0.000146656
2054.19	16.848	0.000740288	0.000721881	0.000703226	0.000684155	0.000664579	0.000644735	0.000624267	0.000602388	0.000578511	0.000552025	0.000523207	0.000493041	0.000461092
2071.03	16.845	0.000560167	0.000545164	0.000529995	0.000514554	0.000498865	0.000483074	0.000466926	0.000449706	0.000431083	0.000410428	0.000388213	0.000364939	0.000340218
2087.88	16.846	0.000202668	0.000196676	0.000190697	0.000184687	0.000178602	0.000172536	0.000166402	0.000159915	0.000152954	0.00014524	0.000137034	0.000128407	0.0001193
2104.73	16.846	3.07794e-05	2.99029e-05	2.90853e-05	2.8246e-05	2.74157e-05	2.65668e-05	2.57002e-05	2.48035e-05	2.38782e-05	2.27849e-05	2.16624e-05	2.03909e-05	1.90939e-05
2121.57	16.849	6.17796e-06	6.06082e-06	5.88763e-06	5.72857e-06	5.56023e-06	5.35245e-06	5.18958e-06	5.01623e-06	4.80212e-06	4.5553e-06	4.3197e-06	4.02603e-06	3.78517e-06
2138.42	16.845	1.68086e-06	1.676e-06	1.63181e-06	1.57824e-06	1.52002e-06	1.4926e-06	1.4421e-06	1.38013e-06	1.34401e-06	1.29024e-06	1.25936e-06	1.14662e-06	1.08676e-06
2155.27	16.848	1.10288e-05	1.07991e-05	1.05781e-05	1.03543e-05	1.01356e-05	9.90698e-06	9.66884e-06	9.42693e-06	9.10599e-06	8.84014e-06	8.36671e-06	8.01761e-06	7.61779e-06
2172.11	16.846	4.40149e-06	4.28169e-06	4.17288e-06	4.06946e-06	3.95586e-06	3.86101e-06	3.7314e-06	3.60951e-06	3.51525e-06	3.30059e-06	3.18194e-06	3.0468e-06	2.84049e-06
2188.96	16.846	6.49968e-07	6.30499e-07	5.99785e-07	6.01865e-07	5.60327e-07	5.85176e-07	5.74205e-07	5.28322e-07	4.99968e-07	4.66069e-07	5.1247e-07	4.1732e-07	2.98443e-07
2205.81	16.845	1.2524e-07	1.16758e-07	1.09514e-07	1.007e-07	9.83576e-08	1.02023e-07	1.06699e-07	6.07778e-08	8.7563e-08	3.35884e-08	5.64753e-08	2.82873e-08	6.54567e-08
2222.65	16.85	1.6239e-07	1.64323e-07	1.3589e-07	1.51867e-07	1.49044e-07	1.99613e-07	1.18023e-07	1.02658e-07	8.19531e-08	1.22858e-07	1.09157e-07	1.2085e-07	7.80867e-08
2239.5	16.846	3.82495e-08	2.99765e-08	2.40608e-08	3.90292e-08	2.04957e-08	2.7587e-08	2.87097e-08	1.83392e-08	3.31306e-08	1.65972e-08	4.2936e-09	3.78865e-08	2.9019e-08
2256.35	16.845	1.53501e-07	1.664e-07	1.35297e-07	1.20384e-07	1.4973e-07	1.49221e-07	9.77997e-08	7.70922e-08	1.55456e-07	9.69125e-08	1.59013e-07	8.99023e-08	8.42564e-08
2273.19	16.846	5.22066e-08	4.66031e-08	6.0471e-08	3.40479e-08	5.83376e-08	1.69375e-08	1.30977e-08	7.87553e-08	2.7206e-08	5.53048e-08	6.27042e-08	3.75135e-08	7.26133e-08
2290.04	16.848	5.41764e-09	3.09718e-08	4.09173e-09	9.86773e-09	1.44914e-08	7.39221e-09	1.42616e-08	0	8.74246e-09	1.64033e-08	0	1.38121e-08	-1.03706e-08
2306.89	16.845	0	9.24133e-09	3.85741e-09	1.85282e-08	-2.26977e-09	2.79373e-09	0	0	0	0	-4.14788e-09	0	0
2323.73	16.848	0	0	0	0	8.58753e-09	0	0	0	0	0	0	0	0
2340.58	16.846	3.74507e-09	0	0	0	0	0	0	0	0	0	0	-6.783e-09	6.85484e-10
2357.43	16.848	2.4649e-09	0	2.66228e-09	0	0	0	1.31647e-08	0	0	0	-4.89245e-08	0	3.61547e-09
2374.27	16.846	0	8.86414e-09	0	0	1.78422e-08	0	0	0	0	-7.12571e-09	0	-8.18423e-08	7.09554e-10
2391.12	16.845	-8.74497e-09	0	3.02574e-08	1.37309e-09	0	0	1.34026e-08	0	0	0	0	0	8.74145e-09
2407.96	16.848	-4.7423e-09	3.70987e-09	0	6.69582e-09	1.53205e-08	0	0	0	6.25735e-09	0	0	0	-5.57729e-09
2424.81	16.848	0	6.47615e-09	0	0	0	1.02101e-08	0	0	-2.56301e-08	0	0	0	-2.58564e-09
2441.66	16.845	5.17694e-09	5.77232e-09	1.87748e-08	0	0	0	1.28603e-24	1.59796e-08	0	0	5.75389e-24	0	-3.0661e-09
2458.5	16.849	0	0	0	1.32791e-08	0	0	2.27656e-08	1.22002e-08	0	1.15309e-08	0	1.27534e-23	-7.55327e-09
2475.35	16.845	6.98371e-08	1.23741e-07	1.21319e-07	8.22022e-08	7.68433e-08	9.32629e-08	6.41616e-08	1.01399e-07	1.23415e-07	7.08548e-08	8.19136e-08	7.35196e-08	3.69703e-08
2492.2	16.846	2.11331e-06	2.02596e-06	2.0041e-06	1.87467e-06	1.82676e-06	1.7143e-06	1.67149e-06	1.7426e-06	1.59851e-06	1.47325e-06	1.4265e-06	1.28422e-06	1.17126e-06
2509.04	16.849	8.64139e-07	8.64425e-07	8.4359e-07	8.15791e-07	7.91399e-07	8.19874e-07	7.41177e-07	7.85503e-07	6.77558e-07	7.84754e-07	6.86096e-07	5.97335e-07	5.52549e-07

## Sheet: k_GF5B
Wavelength	FWHM	k_Summer_L	k_Summer_M	k_Summer_H	k_Winter_L	k_Winter_M	k_Winter_H	k_1976_L	k_1976_M	k_1976_H
1009	8.546	0	0	0	0	0	0	0	0	0	0	0	0	0
1017.42	8.546	0	0	0	0	0	0	0	0	0	0	0	0	0
1025.83	8.546	0	0	0	0	0	0	0	0	0	0	0	0	0
1034.25	8.546	1.98535e-07	1.94211e-07	1.84893e-07	1.80195e-07	1.78537e-07	1.74864e-07	1.69034e-07	1.60546e-07	1.45729e-07	1.48798e-07	1.50344e-07	1.34266e-07	1.34624e-07
1042.67	8.546	1.99935e-07	1.91421e-07	1.84312e-07	1.89284e-07	1.83163e-07	1.77547e-07	1.76182e-07	1.58563e-07	1.79966e-07	1.64099e-07	1.44052e-07	1.48488e-07	1.20224e-07
1051.08	8.546	1.20782e-06	1.16243e-06	1.15453e-06	1.11968e-06	1.06295e-06	1.06399e-06	1.01256e-06	9.83853e-07	9.60248e-07	9.11589e-07	8.92876e-07	8.33514e-07	8.10022e-07
1059.5	8.546	8.3135e-08	8.27806e-08	1.00023e-07	8.83222e-08	9.35524e-08	5.76789e-08	6.65128e-08	6.01149e-08	6.74722e-08	9.19284e-08	5.54887e-08	7.50244e-08	5.22337e-08
1067.92	8.546	1.77663e-07	1.59762e-07	1.59784e-07	1.50161e-07	1.35442e-07	1.40164e-07	1.5887e-07	1.16836e-07	1.0826e-07	1.29701e-07	1.20734e-07	1.06964e-07	1.13998e-07
1076.33	8.546	2.78067e-08	1.81626e-08	2.04916e-08	2.46386e-08	2.35561e-08	4.3058e-09	1.47945e-08	1.05922e-08	1.17915e-08	6.58959e-09	1.93149e-08	-4.7955e-25	1.8215e-08
1084.75	8.546	0	0	0	0	0	0	0	0	0	0	0	0	-1.00322e-08
1093.17	8.546	0	4.29535e-09	0	0	1.06071e-08	0	0	0	0	-5.32861e-09	0	0	0
1101.58	8.546	0	0	0	0	2.37541e-09	0	-4.68703e-09	0	0	0	0	0	0
1110	8.546	0	2.32635e-09	0	0	3.74207e-09	0	2.40813e-09	0	0	0	0	0	0
1118.42	8.546	0	0	7.99899e-10	0	-2.21616e-09	0	0	0	0	5.20621e-09	0	0	0
1126.83	8.546	0	0	0	0	0	0	0	0	0	0	0	3.97228e-09	0
1135.25	8.546	0	0	0	0	7.07353e-09	0	0	0	0	1.207e-09	0	0	0
1143.67	8.546	0	0	0	0	0	0	0	0	0	0	0	0	0
1152.08	8.546	0	0	0	0	0	0	0	0	0	0	0	0	0
1160.5	8.546	0	0	0	0	0	0	0	0	0	0	0	0	0
1168.92	8.546	0	0	0	0	0	0	0	0	0	0	0	0	0
1177.33	8.546	0	0	0	0	0	0	0	0	0	0	0	0	0
1185.75	8.546	0	0	0	0	0	0	0	0	0	0	0	0	0
1194.17	8.546	0	0	0	0	0	0	0	0	0	0	0	0	0
1202.58	8.546	1.99122e-05	1.94574e-05	1.89885e-05	1.85327e-05	1.80711e-05	1.75816e-05	1.71121e-05	1.66367e-05	1.61418e-05	1.55882e-05	1.50358e-05	1.44934e-05	1.39638e-05
1211	8.546	1.32418e-05	1.29162e-05	1.25715e-05	1.22735e-05	1.19091e-05	1.15715e-05	1.12673e-05	1.09126e-05	1.05474e-05	1.01112e-05	9.82279e-06	9.36202e-06	9.02295e-06
1219.42	8.546	2.09568e-05	2.04564e-05	1.99179e-05	1.94268e-05	1.88902e-05	1.83479e-05	1.78396e-05	1.73361e-05	1.67243e-05	1.61777e-05	1.56076e-05	1.4975e-05	1.44547e-05
1227.83	8.546	4.61784e-06	4.49081e-06	4.33314e-06	4.2011e-06	4.08046e-06	3.97045e-06	3.79794e-06	3.6738e-06	3.52908e-06	3.3746e-06	3.22772e-06	3.09003e-06	3.00766e-06
1236.25	8.546	8.43555e-07	8.31906e-07	8.18341e-07	8.0727e-07	7.53846e-07	7.52786e-07	7.09369e-07	6.6919e-07	6.81836e-07	6.24514e-07	6.2232e-07	5.81443e-07	4.83196e-07
1244.67	8.546	3.75444e-08	7.81972e-08	5.30609e-08	4.96996e-08	3.9407e-08	3.54029e-08	7.68566e-08	6.82095e-08	4.65764e-08	4.58699e-08	5.17942e-08	4.96515e-08	1.71491e-08
1253.08	8.546	1.88625e-07	1.917e-07	1.77946e-07	1.60279e-07	1.53239e-07	1.50063e-07	1.17544e-07	2.0904e-07	1.73486e-07	1.63352e-07	1.27022e-07	1.02842e-07	1.96956e-07
1261.5	8.546	1.89489e-07	1.67918e-07	1.65091e-07	2.23001e-07	1.69005e-07	1.2203e-07	1.54188e-07	1.84762e-07	1.25538e-07	1.85543e-07	1.88485e-07	2.05072e-07	1.52425e-07
1269.92	8.546	6.34871e-08	6.1424e-08	5.64052e-08	6.17995e-08	4.46694e-08	6.48071e-08	5.52472e-08	3.82235e-08	2.48189e-08	1.30923e-08	5.30215e-08	6.7277e-08	5.99555e-09
1278.33	8.546	8.00251e-09	0	0	1.6489e-08	0	1.48696e-24	0	0	0	0	0	0	0
1286.75	8.546	5.85256e-07	5.74882e-07	5.67577e-07	5.22395e-07	4.9436e-07	5.10223e-07	5.18772e-07	4.55105e-07	4.40054e-07	4.01093e-07	3.85169e-07	3.24034e-07	3.80443e-07
1295.17	8.546	1.4581e-06	1.41543e-06	1.36766e-06	1.30321e-06	1.2881e-06	1.23838e-06	1.19896e-06	1.21923e-06	1.17487e-06	1.12692e-06	1.00912e-06	9.9784e-07	9.95378e-07
1303.58	8.546	1.85133e-08	2.86188e-08	3.09621e-08	1.85946e-08	4.20597e-08	1.1305e-08	4.62717e-08	9.19221e-09	2.6612e-08	0	1.13319e-08	-1.04239e-08	0
1312	8.546	3.15427e-06	3.08047e-06	3.01233e-06	2.93079e-06	2.84656e-06	2.76972e-06	2.69604e-06	2.61688e-06	2.52664e-06	2.484e-06	2.38695e-06	2.28557e-06	2.17971e-06
1320.42	8.546	4.17046e-06	4.03954e-06	3.93758e-06	3.80035e-06	3.70661e-06	3.6163e-06	3.52023e-06	3.36373e-06	3.23955e-06	3.16622e-06	2.97861e-06	3.03301e-06	2.714e-06
1328.83	8.546	6.13753e-08	5.10662e-08	4.60976e-08	3.35835e-08	6.36987e-08	8.47264e-08	7.87426e-08	5.39408e-08	3.20883e-08	3.42798e-08	1.9053e-08	7.6092e-08	1.35526e-08
1337.25	8.546	2.07917e-06	1.96221e-06	1.93955e-06	1.914e-06	1.83309e-06	1.80978e-06	1.78378e-06	1.73044e-06	1.62758e-06	1.61623e-06	1.55601e-06	1.522e-06	1.46311e-06
1345.66	8.546	1.57541e-06	1.53679e-06	1.49816e-06	1.46891e-06	1.31461e-06	1.33516e-06	1.24032e-06	1.2061e-06	1.21509e-06	1.09894e-06	1.0887e-06	9.88069e-07	9.81549e-07
1354.08	8.546	2.30681e-08	1.4381e-07	6.32301e-08	1.35167e-08	5.95169e-08	1.63459e-08	5.38308e-08	3.30135e-08	4.85622e-08	8.16094e-08	3.70352e-08	2.47816e-08	1.70784e-08
1362.5	8.546	2.34623e-08	1.10692e-08	8.96046e-09	1.43355e-08	1.24537e-08	2.6915e-08	1.6853e-08	1.8211e-09	1.01723e-08	2.16947e-08	2.15318e-08	1.67107e-08	2.63918e-08
1370.91	8.546	1.34683e-07	1.32281e-07	1.05416e-07	1.3281e-07	1.45552e-07	1.50289e-07	1.37563e-07	1.53458e-07	1.22621e-07	1.36241e-07	1.28521e-07	1.23046e-07	1.29556e-07
1379.33	8.546	7.03938e-08	4.8404e-08	7.07219e-08	3.03112e-08	6.90727e-08	5.25732e-08	9.61132e-08	6.53032e-08	6.81273e-08	5.99567e-08	5.95304e-08	6.33779e-08	5.42101e-08
1387.75	8.546	3.59043e-09	5.83189e-09	0	2.5091e-09	0	0	1.44652e-08	0	8.69354e-09	7.28167e-09	0	1.80729e-08	5.40665e-09
1396.16	8.546	2.33165e-09	3.3353e-09	2.65454e-09	0	0	0	3.62305e-09	0	4.44802e-09	0	4.42692e-09	4.10401e-09	0
1404.58	8.546	1.96101e-08	-5.47754e-09	0	5.98077e-09	0	0	0	0	5.61472e-09	0	0	0	0
1413	8.546	2.09951e-09	0	0	0	0	0	0	0	0	0	2.01148e-09	3.1241e-09	0
1421.41	8.546	0	3.46461e-08	3.25265e-09	8.8633e-10	4.04256e-09	1.55373e-08	1.81165e-09	2.67723e-09	0	1.25344e-09	1.18936e-09	2.50096e-09	6.28641e-09
1429.83	8.546	0.00011179	0.000111299	0.000110699	0.00011	0.000109203	0.000108178	0.000106913	0.000105707	0.000104157	0.00010231	0.000100386	9.82511e-05	9.59768e-05
1438.25	8.546	0.000189334	0.00018523	0.000180902	0.000176307	0.000171733	0.000166989	0.000162102	0.000157095	0.000151865	0.000146329	0.000140665	0.000135025	0.000129348
1446.66	8.546	4.17217e-05	4.0467e-05	3.92908e-05	3.79641e-05	3.6631e-05	3.53687e-05	3.40551e-05	3.2795e-05	3.13526e-05	2.99434e-05	2.85228e-05	2.71011e-05	2.56913e-05
1455.08	8.546	1.79469e-06	1.71443e-06	1.68813e-06	1.64673e-06	1.48435e-06	1.47746e-06	1.34863e-06	1.22965e-06	1.2616e-06	1.15942e-06	1.11063e-06	1.05981e-06	9.85649e-07
1463.5	8.546	7.27342e-08	7.63497e-08	1.03845e-08	1.71178e-08	2.2815e-08	1.24067e-07	4.36128e-08	2.07888e-08	7.23318e-08	2.82252e-08	1.79879e-08	4.67746e-08	4.0456e-08
1471.91	8.546	8.04382e-06	7.93243e-06	7.79624e-06	7.55463e-06	7.50565e-06	7.26972e-06	7.13547e-06	6.8931e-06	6.77145e-06	6.561e-06	6.33022e-06	6.09759e-06	5.87748e-06
1480.33	8.546	5.90051e-06	5.7659e-06	5.57653e-06	5.49971e-06	5.42201e-06	5.22724e-06	5.05896e-06	4.86224e-06	4.75084e-06	4.60408e-06	4.45095e-06	4.27615e-06	4.11747e-06
1488.75	8.546	6.57022e-07	6.54629e-07	6.73614e-07	6.38702e-07	5.6438e-07	4.79899e-07	5.30984e-07	5.25328e-07	4.44188e-07	5.51276e-07	4.13224e-07	4.36795e-07	4.0949e-07
1497.16	8.546	2.81791e-06	2.78772e-06	2.68575e-06	2.59597e-06	2.541e-06	2.53589e-06	2.42151e-06	2.37561e-06	2.25759e-06	2.12435e-06	2.10881e-06	2.01575e-06	1.91299e-06
1505.58	8.546	9.32658e-08	1.09588e-07	1.31775e-07	1.12724e-07	1.02689e-07	6.1922e-08	1.28545e-07	5.00233e-08	1.16277e-07	7.40808e-08	4.97142e-08	5.56714e-08	6.07784e-08
1514	8.546	2.48158e-24	9.22226e-09	0	0	0	1.97775e-08	6.78795e-09	1.42068e-08	-1.48628e-08	0	3.84843e-09	7.69864e-09	6.27941e-09
1522.41	8.546	9.86599e-07	9.9896e-07	9.05703e-07	9.86987e-07	8.552e-07	8.96321e-07	8.03041e-07	7.56495e-07	6.75031e-07	7.0952e-07	6.60537e-07	6.14148e-07	5.9076e-07
1530.83	8.546	1.6458e-05	1.60309e-05	1.56002e-05	1.51939e-05	1.47281e-05	1.42544e-05	1.39127e-05	1.3291e-05	1.28664e-05	1.24402e-05	1.18648e-05	1.13629e-05	1.08236e-05
1539.25	8.546	2.7509e-05	2.69458e-05	2.62911e-05	2.56274e-05	2.50684e-05	2.4355e-05	2.36419e-05	2.29568e-05	2.22912e-05	2.15359e-05	2.07253e-05	1.99255e-05	1.9108e-05
1547.66	8.546	2.67223e-06	2.62308e-06	2.49904e-06	2.43899e-06	2.36405e-06	2.27083e-06	2.28704e-06	2.12121e-06	1.99127e-06	1.93956e-06	1.85519e-06	1.76476e-06	1.67486e-06
1556.08	8.546	2.17147e-07	2.08931e-07	2.54842e-07	1.5783e-07	2.78484e-07	2.23369e-07	1.88318e-07	1.94606e-07	2.62536e-07	1.35503e-07	1.66983e-07	1.6785e-07	1.59974e-07
1564.5	8.546	4.13657e-06	3.96922e-06	3.86717e-06	3.64112e-06	3.47565e-06	3.2885e-06	3.26175e-06	3.17632e-06	2.88529e-06	2.69665e-06	2.61401e-06	2.46944e-06	2.30258e-06
1572.91	8.546	0.000166346	0.000162254	0.000158106	0.000153973	0.000149681	0.000145353	0.000141101	0.000136654	0.000131961	0.000126968	0.000121904	0.000116788	0.000111581
1581.33	8.546	9.97331e-05	9.72912e-05	9.48286e-05	9.22419e-05	8.96842e-05	8.7141e-05	8.45347e-05	8.17402e-05	7.9017e-05	7.59986e-05	7.29423e-05	6.98716e-05	6.67262e-05
1589.75	8.546	2.44701e-06	2.3055e-06	2.21243e-06	2.12541e-06	2.07919e-06	1.96596e-06	1.90631e-06	1.75057e-06	1.77403e-06	1.60735e-06	1.52355e-06	1.43946e-06	1.33411e-06
1598.16	8.546	6.6737e-05	6.49888e-05	6.33138e-05	6.1514e-05	5.97379e-05	5.79261e-05	5.61772e-05	5.42871e-05	5.22976e-05	5.02824e-05	4.8159e-05	4.60234e-05	4.38476e-05
1606.58	8.546	0.000144091	0.000140784	0.000137365	0.000133969	0.000130455	0.000126936	0.000123318	0.000119711	0.000115748	0.000111561	0.000107244	0.000102855	9.83807e-05
1615	8.546	5.0801e-05	4.93195e-05	4.78814e-05	4.64154e-05	4.49012e-05	4.33825e-05	4.19518e-05	4.04761e-05	3.89108e-05	3.72125e-05	3.55233e-05	3.38191e-05	3.20795e-05
1623.41	8.546	3.90202e-06	3.76631e-06	3.5861e-06	3.48332e-06	3.33488e-06	3.20004e-06	3.04814e-06	2.9017e-06	2.75924e-06	2.56685e-06	2.41043e-06	2.26378e-06	2.11534e-06
1631.83	8.546	3.3444e-06	3.2441e-06	3.20344e-06	3.08076e-06	3.03657e-06	2.88665e-06	2.93581e-06	2.89402e-06	2.67286e-06	2.57237e-06	2.47263e-06	2.37246e-06	2.2461e-06
1640.25	8.546	2.38129e-05	2.32631e-05	2.26612e-05	2.20797e-05	2.1484e-05	2.08498e-05	2.02831e-05	1.97313e-05	1.89708e-05	1.82258e-05	1.7494e-05	1.67468e-05	1.59444e-05
1648.66	8.546	2.37581e-05	2.32414e-05	2.26207e-05	2.20804e-05	2.16314e-05	2.09469e-05	2.0388e-05	1.98115e-05	1.91809e-05	1.84876e-05	1.77687e-05	1.70246e-05	1.62814e-05
1657.08	8.546	4.25635e-06	4.1009e-06	3.91193e-06	3.7991e-06	3.65844e-06	3.50284e-06	3.45761e-06	3.22824e-06	3.13713e-06	2.96959e-06	2.84041e-06	2.67894e-06	2.50856e-06
1665.5	8.546	1.88662e-06	1.82626e-06	1.773e-06	1.55858e-06	1.69594e-06	1.58741e-06	1.47398e-06	1.48632e-06	1.3909e-06	1.32938e-06	1.2808e-06	1.1987e-06	1.17313e-06
1673.91	8.546	5.40678e-07	3.96901e-07	4.28624e-07	4.58819e-07	3.43304e-07	4.95776e-07	5.11094e-07	3.3663e-07	3.7825e-07	3.47177e-07	3.45821e-07	3.10342e-07	3.09575e-07
1682.33	8.546	7.61792e-08	8.01087e-08	2.00577e-07	1.12664e-07	9.93667e-08	1.34038e-07	2.53757e-07	1.1679e-07	9.58632e-08	8.9703e-08	8.90161e-08	1.14046e-07	9.0942e-08
1690.75	8.546	2.28618e-08	0	7.96162e-09	5.85216e-08	3.10639e-08	2.76601e-08	3.93874e-08	3.11876e-08	3.04361e-08	3.25904e-08	2.54048e-08	2.50843e-08	9.81265e-09
1699.16	8.546	8.1199e-09	5.84409e-09	0	3.37262e-08	0	1.82697e-08	0	6.01386e-09	8.95308e-09	1.21979e-08	1.09869e-08	2.53439e-08	-1.00187e-08
1707.58	8.546	0	4.29387e-08	8.28979e-08	0	2.04383e-08	0	4.68926e-09	6.32981e-09	1.1417e-08	1.91735e-08	1.83129e-09	3.49068e-10	6.18726e-09
1716	8.546	0	1.62525e-08	0	0	3.63717e-08	0	4.2687e-09	5.93494e-09	1.1031e-08	2.25055e-08	1.59796e-08	-1.93226e-08	-7.80127e-09
1724.41	8.546	-1.82408e-24	1.81229e-08	0	5.16912e-09	3.64678e-09	7.63825e-09	4.28236e-09	3.69357e-09	1.28835e-08	-4.65954e-09	2.23175e-09	-5.63619e-24	7.87215e-10
1732.83	8.546	0	0	0	-4.48294e-24	0	0	0	8.59055e-09	6.69327e-09	-4.31119e-09	1.11959e-09	-9.67273e-10	4.16292e-09
1741.25	8.546	0	3.39957e-08	0	0	6.84443e-09	0	-3.50346e-09	3.6606e-09	9.1848e-11	7.41057e-09	0	3.21748e-24	0
1749.66	8.546	8.17989e-09	1.7344e-08	2.26828e-08	1.12452e-08	2.20319e-08	5.90629e-08	2.21139e-08	1.13169e-08	2.25661e-08	1.0323e-08	1.4518e-08	0	6.79667e-09
1758.08	8.546	1.49177e-07	1.85024e-07	1.21659e-07	7.65504e-08	7.48519e-08	2.25232e-07	1.15295e-07	1.25499e-07	1.17527e-07	1.23706e-07	1.05532e-07	7.97196e-08	9.27045e-08
1766.5	8.546	3.79282e-08	4.56167e-08	1.32867e-07	1.83318e-07	4.4129e-08	7.88916e-08	6.50753e-08	3.7853e-08	7.01946e-08	3.66039e-08	6.13753e-08	3.92518e-08	1.4362e-08
1774.91	8.546	2.34731e-08	0	0	2.74849e-08	2.40615e-09	8.32114e-09	8.13508e-09	1.00761e-08	1.09797e-08	9.80816e-09	2.58477e-08	3.26694e-08	2.00035e-08
1783.33	8.546	7.10529e-08	3.35951e-08	4.0933e-08	5.92728e-08	1.71966e-08	5.88872e-08	4.5876e-08	5.22188e-08	4.95312e-08	6.36431e-08	3.18134e-08	5.02087e-08	1.45989e-08
1791.75	8.546	1.55397e-07	6.22009e-08	1.2154e-07	3.05332e-08	3.45995e-08	1.15079e-07	6.27109e-08	5.68376e-08	6.1788e-08	5.70729e-08	8.10044e-08	8.42136e-08	8.21005e-08
1800.16	8.546	3.21065e-08	1.21836e-08	6.98014e-08	1.49908e-08	3.17232e-08	1.76088e-08	2.53395e-08	2.47232e-08	4.81114e-08	2.20487e-08	5.20395e-08	2.13046e-08	1.68431e-24
1808.58	8.546	3.96862e-10	0	0	3.40196e-09	2.22704e-08	2.41032e-08	8.25584e-09	2.63511e-08	0	3.2859e-08	1.19372e-08	0	1.80575e-08
1817	8.546	7.07756e-10	0	5.0109e-09	0	0	0	0	0	1.32763e-08	0	0	0	0
1825.41	8.546	0	0	0	0	0	0	0	0	0	0	0	0	0
1833.83	8.546	0	0	0	0	0	0	0	0	0	0	0	0	0
1842.25	8.546	0	0	0	0	0	0	0	0	0	0	0	0	0
1850.66	8.546	0	0	0	0	2.67607e-09	0	0	0	0	0	0	0	0
1859.08	8.546	0	0	0	0	0	0	0	0	0	4.68234e-08	0	0	0
1867.5	8.546	1.02992e-07	5.77993e-08	1.24542e-07	6.04347e-08	1.27032e-07	6.18157e-08	1.19371e-07	1.37707e-07	6.5092e-08	1.12341e-07	6.94974e-08	8.19666e-08	7.35251e-08
1875.91	8.546	1.20268e-05	1.18575e-05	1.18197e-05	1.17409e-05	1.15837e-05	1.14476e-05	1.13111e-05	1.10706e-05	1.08476e-05	1.05719e-05	1.02e-05	9.91897e-06	9.55087e-06
1884.33	8.546	3.18995e-05	3.16491e-05	3.13007e-05	3.10237e-05	3.06602e-05	3.02114e-05	2.96784e-05	2.9088e-05	2.84073e-05	2.77101e-05	2.68645e-05	2.59332e-05	2.49856e-05
1892.75	8.546	3.62261e-06	3.59247e-06	3.55449e-06	3.50904e-06	3.44973e-06	3.38403e-06	3.42076e-06	3.32634e-06	3.18208e-06	3.1404e-06	3.06424e-06	2.98317e-06	2.80995e-06
1901.16	8.546	6.0276e-07	6.54484e-07	5.71487e-07	5.98956e-07	5.01603e-07	4.48895e-07	5.41865e-07	3.71074e-07	4.95864e-07	5.55832e-07	5.15185e-07	4.10636e-07	5.05754e-07
1909.58	8.546	4.89223e-07	4.60901e-07	4.9649e-07	4.94523e-07	4.15792e-07	5.42589e-07	4.30558e-07	4.51712e-07	3.96494e-07	3.90424e-07	3.10519e-07	4.70354e-07	2.92937e-07
1918	8.546	2.59699e-07	2.69171e-07	2.5815e-07	2.40009e-07	2.71542e-07	2.71211e-07	2.46551e-07	2.3741e-07	1.34613e-07	2.65688e-07	2.55209e-07	1.18935e-07	7.47632e-08
1926.41	8.546	2.44154e-07	2.09131e-07	2.57495e-07	2.10534e-07	1.98496e-07	1.68211e-07	1.99607e-07	1.72884e-07	2.657e-07	1.30717e-07	1.43305e-07	1.13663e-07	1.47926e-07
1934.83	8.546	3.4276e-06	3.28564e-06	3.17182e-06	3.0767e-06	2.94484e-06	2.79491e-06	2.69135e-06	2.53274e-06	2.33885e-06	2.24343e-06	2.03728e-06	1.84495e-06	1.71646e-06
1943.25	8.546	0.000179025	0.000173456	0.000167766	0.000161868	0.000155886	0.000149778	0.000143476	0.000136886	0.000129852	0.000122344	0.000114446	0.000106378	9.83145e-05
1951.66	8.546	0.000748527	0.000729939	0.000710699	0.000690713	0.000669959	0.000648647	0.000626446	0.000602629	0.000577116	0.000549201	0.000519224	0.000488455	0.000456755
1960.08	8.546	0.000845271	0.000827151	0.000808292	0.000788585	0.000767831	0.000746201	0.00072344	0.000698863	0.000672087	0.000642378	0.000610211	0.000576331	0.000541843
1968.5	8.546	0.000661258	0.000643754	0.000625914	0.000607661	0.000589003	0.000570079	0.000550651	0.000530016	0.000507862	0.000483534	0.000457546	0.000430568	0.000402756
1976.91	8.546	0.000170433	0.000165711	0.000161022	0.000156182	0.000151283	0.000146302	0.000141283	0.000135929	0.000130165	0.000123874	0.000117155	0.000110203	0.000103025
1985.33	8.546	2.89565e-05	2.80826e-05	2.7301e-05	2.64623e-05	2.56464e-05	2.48169e-05	2.39558e-05	2.30721e-05	2.21368e-05	2.10669e-05	2.00016e-05	1.88377e-05	1.75754e-05
1993.75	8.546	0.000144375	0.000140665	0.000136916	0.000133113	0.00012922	0.000125265	0.000121211	0.000116862	0.000112169	0.000107	0.000101339	9.55249e-05	8.94144e-05
2002.16	8.546	0.00188562	0.00183804	0.00178882	0.00173765	0.00168413	0.00162828	0.00156947	0.00150666	0.00143858	0.00136425	0.00128346	0.00119995	0.00111618
2010.58	8.546	0.00198448	0.00192988	0.00187393	0.00181627	0.00175682	0.00169543	0.00163155	0.00156359	0.00149038	0.00141051	0.00132452	0.00123573	0.00114635
2019	8.546	0.00133945	0.00130207	0.00126396	0.00122498	0.00118485	0.00114398	0.00110174	0.00105664	0.00100823	0.000955247	0.000898418	0.000839481	0.000779217
2027.41	8.546	0.000400238	0.000387806	0.00037538	0.000362847	0.00035017	0.000337551	0.000324712	0.000311214	0.000296797	0.000280893	0.000264203	0.000246919	0.000228859
2035.83	8.546	0.000214062	0.000208469	0.00020289	0.000197263	0.000191514	0.000185796	0.00017993	0.000173696	0.000166972	0.000159508	0.000151437	0.000143101	0.000134145
2044.25	8.546	0.000294159	0.000287163	0.000280045	0.000272814	0.000265405	0.000257955	0.000250302	0.000242204	0.000233338	0.000223418	0.000212705	0.000201384	0.000189426
2052.66	8.546	0.000815565	0.000794462	0.000773093	0.0007513	0.000728992	0.000706396	0.000683158	0.000658356	0.000631385	0.00060161	0.000569256	0.000535537	0.00049993
2061.08	8.546	0.000576175	0.000562467	0.000548596	0.00053435	0.00051978	0.000505007	0.000489728	0.000473387	0.000455491	0.000435552	0.000413841	0.000390898	0.000366579
2069.49	8.546	0.000601725	0.000585332	0.000568747	0.000551886	0.000534768	0.000517582	0.00049996	0.00048121	0.000460973	0.000438556	0.000414437	0.000389255	0.000362539
2077.91	8.546	0.000330744	0.000321828	0.000312898	0.000303833	0.000294586	0.000285297	0.000275868	0.000265754	0.000254876	0.000242705	0.000229731	0.000216039	0.000201478
2086.33	8.546	0.000236102	0.000229183	0.000222249	0.000215271	0.000208206	0.00020114	0.000194015	0.000186481	0.000178375	0.000169386	0.00015983	0.000149768	0.000139161
2094.74	8.546	9.54221e-05	9.24922e-05	8.95519e-05	8.66189e-05	8.36326e-05	8.07462e-05	7.78009e-05	7.4648e-05	7.13449e-05	6.76632e-05	6.38548e-05	5.97298e-05	5.54154e-05
2103.16	8.546	3.46007e-05	3.35955e-05	3.26553e-05	3.16995e-05	3.07568e-05	2.98076e-05	2.88029e-05	2.77859e-05	2.67127e-05	2.54855e-05	2.42626e-05	2.27829e-05	2.13216e-05
2111.58	8.546	2.44083e-05	2.38457e-05	2.32871e-05	2.27103e-05	2.2123e-05	2.14782e-05	2.08734e-05	2.02383e-05	1.95251e-05	1.87537e-05	1.7772e-05	1.6902e-05	1.59279e-05
2119.99	8.546	7.49712e-06	7.36254e-06	7.14752e-06	6.95181e-06	6.72612e-06	6.47222e-06	6.24811e-06	6.04967e-06	5.77685e-06	5.48152e-06	5.20808e-06	4.81639e-06	4.58056e-06
2128.41	8.546	2.09779e-06	1.96027e-06	1.8939e-06	1.82572e-06	1.81605e-06	1.72661e-06	1.71092e-06	1.64552e-06	1.55955e-06	1.473e-06	1.35416e-06	1.29326e-06	1.14215e-06
2136.83	8.546	1.37976e-06	1.3508e-06	1.33229e-06	1.28228e-06	1.23057e-06	1.21564e-06	1.15235e-06	1.09035e-06	1.03811e-06	1.01025e-06	9.57138e-07	8.42693e-07	8.18942e-07
2145.24	8.546	7.2988e-06	7.17288e-06	6.9787e-06	6.80589e-06	6.62061e-06	6.45391e-06	6.29448e-06	6.12209e-06	5.93865e-06	5.6572e-06	5.46572e-06	5.21331e-06	4.85695e-06
2153.66	8.546	1.09319e-05	1.07127e-05	1.05046e-05	1.02917e-05	1.00774e-05	9.8701e-06	9.64751e-06	9.40184e-06	9.09229e-06	8.84803e-06	8.3553e-06	8.04715e-06	7.62108e-06
2162.08	8.546	1.17033e-05	1.14335e-05	1.1186e-05	1.09208e-05	1.06655e-05	1.0381e-05	1.0109e-05	9.81731e-06	9.50274e-06	9.13505e-06	8.72531e-06	8.24897e-06	7.7749e-06
2170.49	8.546	5.24073e-06	5.10249e-06	4.9746e-06	4.84334e-06	4.71422e-06	4.60009e-06	4.44605e-06	4.28848e-06	4.17978e-06	3.93045e-06	3.81138e-06	3.6262e-06	3.37481e-06
2178.91	8.546	1.01828e-06	9.83231e-07	9.59088e-07	9.39039e-07	8.87701e-07	8.76725e-07	8.61735e-07	7.96388e-07	8.68685e-07	7.49557e-07	6.49393e-07	7.65297e-07	5.98292e-07
2187.33	8.546	7.4929e-07	7.28909e-07	6.86024e-07	6.98847e-07	6.12892e-07	6.73434e-07	6.69949e-07	6.22527e-07	5.40444e-07	5.42862e-07	6.03596e-07	4.28281e-07	3.51736e-07
2195.74	8.546	2.89908e-07	3.00334e-07	2.6324e-07	2.63101e-07	2.88053e-07	2.62713e-07	2.36337e-07	2.32401e-07	2.37424e-07	2.33e-07	2.31318e-07	2.36543e-07	1.38237e-07
2204.16	8.546	6.43872e-08	4.00966e-08	5.8441e-08	2.74684e-08	3.61165e-08	3.21275e-08	5.62257e-08	1.9578e-08	2.57206e-08	0	3.92267e-08	1.59685e-24	5.82311e-08
2212.58	8.546	2.80011e-07	2.73527e-07	2.44765e-07	2.73398e-07	2.4525e-07	2.667e-07	2.16505e-07	1.95419e-07	2.31068e-07	1.28084e-07	1.12681e-07	4.33102e-08	1.04737e-07
2220.99	8.546	1.63552e-07	1.61982e-07	1.42699e-07	1.60809e-07	1.48613e-07	2.04592e-07	1.16379e-07	1.1713e-07	8.74223e-08	1.36104e-07	9.91837e-08	1.15245e-07	8.19383e-08
2229.41	8.546	1.15067e-07	1.33304e-07	7.56486e-08	1.09528e-07	1.15326e-07	1.08422e-07	8.18392e-08	1.04374e-07	8.80397e-08	3.27514e-08	3.01495e-08	5.60182e-08	7.62796e-08
2237.83	8.546	2.59839e-08	2.91826e-08	1.87332e-08	4.48013e-08	1.86087e-08	1.20667e-08	1.76352e-08	1.06366e-08	2.7182e-08	1.1713e-08	9.84181e-09	6.6267e-08	0
2246.24	8.546	8.75992e-08	4.27114e-08	7.31249e-08	6.53086e-08	5.38802e-09	3.85492e-08	6.98733e-08	3.26591e-08	5.35976e-08	2.41257e-08	4.7127e-08	0	8.84102e-08
2254.66	8.546	1.8839e-07	1.82534e-07	1.50027e-07	1.64829e-07	1.7021e-07	1.78879e-07	1.30166e-07	9.11428e-08	2.09209e-07	6.29314e-08	1.78723e-07	1.19745e-07	8.94257e-08
2263.08	8.546	7.19577e-08	1.01806e-07	8.57879e-08	1.6882e-08	1.03894e-07	5.56974e-08	2.95858e-08	3.19042e-08	2.1844e-08	1.25e-07	3.93674e-08	4.85734e-08	4.23275e-08
2271.49	8.546	4.60656e-08	2.91171e-08	6.27059e-08	2.8554e-08	7.39691e-08	-3.91657e-09	0	7.28651e-08	3.97581e-08	6.52174e-08	5.91633e-08	2.94511e-08	1.12824e-07
2279.91	8.546	2.58691e-08	8.77592e-08	3.11499e-08	6.33306e-08	1.83229e-08	4.31293e-08	2.16701e-08	6.9845e-08	9.26801e-09	3.56443e-08	5.75189e-08	6.4722e-08	-2.59668e-08
2288.33	8.546	7.86368e-09	2.5952e-08	0	1.49769e-08	1.6978e-08	1.12263e-08	2.25379e-08	0	0	2.94779e-08	0	0	-1.86514e-08
2296.74	8.546	1.62434e-23	2.5129e-08	1.10845e-08	4.84499e-24	0	0	0	0	2.04401e-08	0	0	0	0
2305.16	8.546	0	1.59645e-08	3.80288e-09	2.40954e-08	0	-8.03688e-09	0	0	0	0	0	0	0
2313.58	8.546	0	0	0	-4.50628e-24	-2.21e-08	2.6928e-08	0	0	0	0	-2.99717e-08	0	0
2321.99	8.546	0	0	0	0	1.16461e-08	0	0	0	0	0	0	0	0
2330.41	8.546	0	0	0	0	1.60754e-08	0	0	0	0	0	0	-2.62365e-08	0
2338.83	8.546	7.15093e-09	0	0	0	0	0	0	0	0	0	0	0	-9.83318e-09
2347.24	8.546	0	0	0	0	0	0	0	0	0	0	0	0	1.1382e-08
2355.66	8.546	4.54983e-09	0	0	0	0	0	0	0	0	0	-5.35611e-08	0	9.25595e-10
2364.08	8.546	1.64381e-09	0	1.60424e-08	0	0	0	2.09011e-08	0	0	0	0	0	8.86932e-09
2372.49	8.546	0	1.77026e-08	0	0	0	0	0	0	0	-1.37932e-08	0	-1.05429e-07	0
2380.91	8.546	0	0	0	3.2614e-09	1.6683e-08	0	0	0	0	0	0	0	5.50265e-09
2389.33	8.546	-8.06861e-09	0	2.65514e-08	0	0	0	2.23523e-08	0	0	0	0	0	1.49725e-08
2397.74	8.546	-7.71344e-09	0	2.9197e-08	0	0	0	0	0	0	0	0	0	1.38302e-08
2406.16	8.546	0	0	0	0	1.53811e-08	0	0	0	0	0	0	0	-8.00525e-09
2414.58	8.546	-5.93851e-09	9.35524e-09	0	8.29765e-09	0	0	0	0	1.92958e-08	0	0	0	-6.82361e-09
2422.99	8.546	0	1.26624e-08	0	0	0	1.64867e-08	0	0	0	0	0	0	0
2431.41	8.546	0	0	0	0	0	0	0	0	-4.74021e-08	0	0	0	-4.14911e-09
2439.83	8.546	8.519e-09	9.52888e-09	2.82607e-08	0	0	0	0	2.14748e-08	0	0	3.74143e-23	0	-5.26724e-09
2448.24	8.546	0	0	0	0	0	0	1.54203e-23	0	0	6.05075e-09	0	0	0
2456.66	8.546	0	0	0	0	0	0	0	1.70991e-08	0	1.77185e-08	0	2.26692e-23	-1.67064e-08
2465.08	8.546	0	6.08986e-24	4.75189e-24	1.5011e-08	5.25574e-08	2.90582e-08	5.42129e-08	0	0	0	0	2.75712e-09	2.68083e-08
2473.49	8.546	8.23244e-09	9.18297e-08	8.87197e-08	3.72488e-08	0	0	-2.92875e-25	6.28905e-08	1.21715e-07	6.65267e-08	5.72487e-08	3.29262e-08	2.96373e-25
2481.91	8.546	1.41077e-06	1.40492e-06	1.3461e-06	1.3287e-06	1.26263e-06	1.23911e-06	1.09351e-06	1.13121e-06	9.58894e-07	9.61325e-07	8.82669e-07	8.63654e-07	7.93274e-07
2490.33	8.546	2.534e-06	2.45976e-06	2.4142e-06	2.24038e-06	2.19938e-06	2.11817e-06	2.01637e-06	2.13773e-06	1.96672e-06	1.82032e-06	1.78785e-06	1.57073e-06	1.447e-06
2498.74	8.546	1.51638e-06	1.39437e-06	1.41085e-06	1.37649e-06	1.40327e-06	1.20829e-06	1.27742e-06	1.20959e-06	1.14325e-06	1.08137e-06	1.05042e-06	9.78702e-07	8.91239e-07
2507.16	8.546	7.10309e-07	7.05117e-07	7.08798e-07	6.5057e-07	6.53735e-07	6.33563e-07	6.17509e-07	5.70508e-07	6.33889e-07	6.43825e-07	5.62965e-07	4.89606e-07	4.55192e-07
2515.58	8.546	1.13443e-06	1.14546e-06	1.05954e-06	1.15192e-06	9.45602e-07	1.07467e-06	9.00442e-07	9.73469e-07	7.0276e-07	9.23547e-07	8.13167e-07	7.32897e-07	6.6691e-07

## Sheet: k_GF5A
Wavelength	FWHM	k_Summer_L	k_Summer_M	k_Summer_H	k_Winter_L	k_Winter_M	k_Winter_H	k_1976_L	k_1976_M	k_1976_H
1014.15	8.25	0	0	0	0	0	0	0	0	0	0	0	0	0
1022.56	8.25	0	0	0	0	0	0	0	0	0	0	0	0	0
1030.98	8.25	0	0	0	0	0	0	0	0	0	0	0	0	0
1039.4	8.25	4.75459e-07	4.60289e-07	4.43899e-07	4.28246e-07	4.28329e-07	4.26643e-07	4.10498e-07	3.8368e-07	3.81885e-07	3.59226e-07	3.6441e-07	3.40656e-07	3.09392e-07
1047.81	8.25	7.22289e-07	6.95058e-07	6.86052e-07	6.78307e-07	6.40972e-07	6.2139e-07	6.06708e-07	5.86298e-07	5.77772e-07	5.47857e-07	5.32068e-07	4.96931e-07	4.75932e-07
1056.23	8.25	3.5611e-07	3.4846e-07	3.80978e-07	3.38306e-07	3.31266e-07	3.19906e-07	2.97949e-07	2.76467e-07	2.60851e-07	2.85751e-07	2.58222e-07	2.70272e-07	2.36152e-07
1064.65	8.25	2.44473e-07	2.39216e-07	2.17926e-07	2.13792e-07	2.08328e-07	1.89434e-07	2.15223e-07	1.76661e-07	1.851e-07	1.94673e-07	1.6626e-07	1.5298e-07	1.65114e-07
1073.06	8.25	4.29989e-08	2.41817e-08	3.6e-08	2.5658e-08	1.72724e-08	1.31605e-08	3.64318e-08	1.16936e-08	1.43461e-08	2.05903e-08	1.88199e-08	1.32118e-08	1.46007e-08
1081.48	8.25	-8.98508e-26	2.38756e-09	0	4.10977e-09	3.2843e-09	0	2.95881e-09	0	0	0	0	0	-1.28901e-08
1089.9	8.25	0	0	0	0	7.20716e-09	0	0	0	0	0	0	0	0
1098.31	8.25	0	2.52032e-09	0	0	4.6433e-09	0	-5.4886e-09	0	0	-4.29573e-09	0	0	0
1106.73	8.25	0	0	0	0	0	0	0	0	0	0	0	0	0
1115.15	8.25	0	3.58612e-09	5.70093e-10	0	8.35082e-10	0	3.3758e-09	0	0	4.11421e-09	0	0	0
1123.56	8.25	0	0	0	0	0	0	0	0	0	0	0	0	0
1131.98	8.25	0	0	0	0	1.08612e-08	0	0	0	0	1.48709e-09	0	6.74174e-09	0
1140.4	8.25	0	0	0	0	0	0	0	0	0	0	0	0	0
1148.81	8.25	0	0	0	0	0	0	0	0	0	0	0	0	0
1157.23	8.25	0	0	0	0	0	0	0	0	0	0	0	0	0
1165.65	8.25	0	0	0	0	0	0	0	0	0	0	0	0	0
1174.06	8.25	0	0	0	0	0	0	0	0	0	0	0	0	0
1182.48	8.25	0	0	0	0	0	0	0	0	0	0	0	0	0
1190.9	8.25	0	0	0	0	0	0	0	0	0	0	0	0	0
1199.31	8.25	4.48603e-07	4.31237e-07	4.18765e-07	4.07979e-07	4.00594e-07	3.77705e-07	3.72123e-07	3.51433e-07	3.50558e-07	3.28496e-07	3.12963e-07	2.91969e-07	2.74914e-07
1207.73	8.25	2.94874e-05	2.88206e-05	2.81148e-05	2.74625e-05	2.67262e-05	2.60291e-05	2.53333e-05	2.46277e-05	2.38533e-05	2.30092e-05	2.2276e-05	2.14149e-05	2.06649e-05
1216.15	8.25	1.12078e-05	1.09236e-05	1.06033e-05	1.03484e-05	1.00299e-05	9.7041e-06	9.45986e-06	9.20771e-06	8.82004e-06	8.47545e-06	8.22355e-06	7.83074e-06	7.57725e-06
1224.56	8.25	1.24675e-05	1.21615e-05	1.18201e-05	1.14866e-05	1.11914e-05	1.09045e-05	1.05412e-05	1.02152e-05	9.86669e-06	9.52818e-06	9.12459e-06	8.7521e-06	8.4663e-06
1232.98	8.25	1.20956e-06	1.15397e-06	1.12646e-06	1.11138e-06	1.04981e-06	1.02295e-06	9.65074e-07	9.40418e-07	9.27428e-07	8.84968e-07	8.17306e-07	8.31125e-07	7.4394e-07
1241.4	8.25	2.3481e-07	3.05717e-07	2.52372e-07	2.57948e-07	2.33358e-07	2.46527e-07	2.4891e-07	2.39455e-07	2.25053e-07	1.87066e-07	2.01987e-07	1.89414e-07	1.68394e-07
1249.81	8.25	1.26068e-07	1.28717e-07	1.39758e-07	1.01022e-07	9.32425e-08	9.83971e-08	7.21556e-08	1.35904e-07	1.27263e-07	1.05254e-07	7.08279e-08	9.38918e-08	1.61705e-07
1258.23	8.25	1.71654e-07	1.26738e-07	1.28516e-07	1.95479e-07	1.26774e-07	1.12277e-07	1.38711e-07	1.74874e-07	1.39847e-07	1.10744e-07	1.68657e-07	1.01513e-07	1.36149e-07
1266.65	8.25	1.66777e-07	1.60248e-07	1.75653e-07	1.74488e-07	1.5441e-07	1.53832e-07	1.38841e-07	1.60679e-07	7.62571e-08	1.16793e-07	1.15184e-07	1.93019e-07	4.06543e-08
1275.06	8.25	5.90469e-09	6.03142e-09	0	6.6981e-09	0	0	0	0	0	0	0	1.98258e-08	0
1283.48	8.25	4.38424e-08	5.66685e-08	4.91956e-08	5.4226e-08	2.8959e-08	5.72106e-08	4.5983e-08	3.57972e-08	2.30938e-08	1.12079e-08	2.02466e-24	5.88825e-09	1.08647e-08
1291.9	8.25	1.90456e-06	1.83071e-06	1.79141e-06	1.70226e-06	1.68804e-06	1.62274e-06	1.59425e-06	1.54601e-06	1.5121e-06	1.49312e-06	1.3533e-06	1.265e-06	1.30231e-06
1300.31	8.25	2.29754e-07	2.50501e-07	2.37293e-07	2.09666e-07	2.02855e-07	1.73857e-07	1.89885e-07	2.0853e-07	1.73245e-07	1.35633e-07	1.28914e-07	1.47828e-07	1.18215e-07
1308.73	8.25	8.83481e-08	9.07088e-08	9.94283e-08	9.32009e-08	9.47201e-08	8.13787e-08	1.02315e-07	8.5061e-08	9.86626e-08	7.85807e-08	9.49766e-08	5.71552e-08	6.39705e-08
1317.15	8.25	6.81729e-06	6.62253e-06	6.45504e-06	6.2631e-06	6.12426e-06	5.9827e-06	5.83244e-06	5.57976e-06	5.42753e-06	5.24813e-06	4.99342e-06	4.91035e-06	4.57994e-06
1325.56	8.25	5.20671e-07	5.09628e-07	4.68971e-07	4.72663e-07	4.75361e-07	4.53476e-07	4.2426e-07	4.12347e-07	3.21887e-07	3.8905e-07	3.58521e-07	4.26278e-07	3.09303e-07
1333.98	8.25	8.36238e-07	7.45253e-07	7.91596e-07	7.23991e-07	6.83537e-07	7.1348e-07	7.1656e-07	6.92421e-07	5.87104e-07	6.26524e-07	6.4378e-07	5.96952e-07	5.55787e-07
1342.4	8.25	2.3226e-06	2.24584e-06	2.17667e-06	2.15819e-06	2.02158e-06	2.00416e-06	1.86442e-06	1.91491e-06	1.90138e-06	1.76952e-06	1.66299e-06	1.63681e-06	1.58281e-06
1350.81	8.25	1.24492e-07	2.22567e-07	1.81315e-07	1.07307e-07	1.45286e-07	9.92428e-08	1.79664e-07	7.51923e-08	1.30098e-07	1.08135e-07	1.21681e-07	6.82394e-08	6.15287e-08
1359.23	8.25	2.07795e-08	1.03873e-08	5.43416e-09	3.70598e-09	1.1194e-08	1.36763e-08	1.1503e-08	7.49692e-09	5.00196e-09	1.4555e-08	1.61169e-08	1.20622e-08	8.24023e-09
1367.65	8.25	8.74895e-08	8.48952e-08	6.90426e-08	8.33838e-08	7.864e-08	1.02999e-07	9.63152e-08	8.91259e-08	7.95917e-08	8.43603e-08	8.05034e-08	7.31411e-08	8.99765e-08
1376.06	8.25	1.10019e-07	8.89228e-08	1.20862e-07	6.57508e-08	1.35421e-07	9.31795e-08	1.60919e-07	9.40372e-08	1.14873e-07	1.16572e-07	1.01713e-07	1.05532e-07	1.03834e-07
1384.48	8.25	9.32789e-09	1.23246e-08	6.7163e-25	1.04242e-08	0	8.77604e-09	1.09467e-08	1.46732e-08	0	1.21632e-08	0	1.72271e-08	6.39048e-09
1392.9	8.25	2.38457e-09	4.53282e-09	0	0	0	0	2.72561e-09	0	3.6359e-09	1.5711e-09	5.53867e-09	7.94685e-09	0
1401.31	8.25	2.31582e-08	-5.31163e-09	2.45997e-09	4.73513e-09	0	0	0	0	8.27751e-09	0	0	0	0
1409.73	8.25	3.40128e-09	0	0	0	0	0	0	0	0	0	0	0	0
1418.15	8.25	0	2.07408e-08	2.95532e-09	0	0	0	1.24294e-09	0	0	0	1.92928e-09	5.6895e-09	0
1426.56	8.25	8.95567e-07	8.23504e-07	7.54472e-07	6.93728e-07	6.72238e-07	6.62128e-07	5.02938e-07	5.35368e-07	5.09055e-07	3.99175e-07	3.69067e-07	3.59551e-07	3.35596e-07
1434.98	8.25	0.000247298	0.000243272	0.000239004	0.000234411	0.000229764	0.000224785	0.000219654	0.000214314	0.000208524	0.000202351	0.000195964	0.000189442	0.0001828
1443.4	8.25	9.30279e-05	9.06113e-05	8.82872e-05	8.57201e-05	8.31657e-05	8.0623e-05	7.801e-05	7.54047e-05	7.26263e-05	6.97115e-05	6.68379e-05	6.38794e-05	6.09637e-05
1451.81	8.25	7.27327e-06	7.0333e-06	6.75921e-06	6.5307e-06	6.17506e-06	5.96619e-06	5.67653e-06	5.42058e-06	5.16142e-06	4.86823e-06	4.59079e-06	4.35234e-06	4.08255e-06
1460.23	8.25	3.11656e-07	2.78257e-07	2.18888e-07	2.18994e-07	1.85108e-07	2.46756e-07	1.54574e-07	1.15911e-07	2.06174e-07	1.50661e-07	1.35705e-07	1.48627e-07	1.21733e-07
1468.65	8.25	3.07488e-06	3.04637e-06	3.00201e-06	2.88809e-06	2.85638e-06	2.80356e-06	2.74006e-06	2.65528e-06	2.57884e-06	2.51234e-06	2.41259e-06	2.32286e-06	2.23646e-06
1477.06	8.25	7.79531e-06	7.67695e-06	7.51287e-06	7.34546e-06	7.27618e-06	7.04608e-06	6.89662e-06	6.62569e-06	6.51681e-06	6.33818e-06	6.08531e-06	5.89071e-06	5.6876e-06
1485.48	8.25	1.35131e-06	1.28875e-06	1.21016e-06	1.26346e-06	1.22042e-06	1.12126e-06	1.09085e-06	1.03743e-06	1.04994e-06	9.53326e-07	9.66533e-07	8.70477e-07	8.24957e-07
1493.9	8.25	2.4031e-06	2.37476e-06	2.34085e-06	2.18331e-06	2.13269e-06	2.0846e-06	2.02864e-06	1.94359e-06	1.88633e-06	1.79393e-06	1.72653e-06	1.69077e-06	1.59537e-06
1502.31	8.25	4.34344e-07	5.10449e-07	4.51804e-07	4.79136e-07	4.13108e-07	4.15506e-07	4.28394e-07	3.79448e-07	3.76516e-07	3.5711e-07	3.27146e-07	3.31834e-07	3.0666e-07
1510.73	8.25	1.84549e-08	0	1.22268e-08	0	1.34319e-08	2.94999e-08	1.78395e-08	1.13702e-08	-7.14987e-09	0	1.15359e-09	-1.13785e-09	7.29596e-09
1519.15	8.25	4.63674e-08	1.13816e-07	1.98691e-08	1.00332e-07	4.44553e-08	9.52989e-08	4.91547e-08	8.20352e-08	2.54582e-08	4.63901e-08	3.81884e-08	2.95867e-08	3.1477e-08
1527.56	8.25	4.90389e-06	4.79272e-06	4.65025e-06	4.5522e-06	4.36114e-06	4.1909e-06	4.05444e-06	3.86714e-06	3.69543e-06	3.60573e-06	3.38172e-06	3.22541e-06	3.06453e-06
1535.98	8.25	3.06373e-05	2.99595e-05	2.92104e-05	2.85144e-05	2.78111e-05	2.69967e-05	2.627e-05	2.54454e-05	2.46373e-05	2.38425e-05	2.29173e-05	2.20183e-05	2.10917e-05
1544.4	8.25	1.33937e-05	1.30888e-05	1.27321e-05	1.23745e-05	1.20227e-05	1.16853e-05	1.13588e-05	1.09178e-05	1.05952e-05	1.0273e-05	9.79671e-06	9.39313e-06	8.97337e-06
1552.81	8.25	2.11452e-07	2.38306e-07	2.04953e-07	1.93471e-07	2.4114e-07	1.93524e-07	2.71699e-07	2.25177e-07	1.56559e-07	1.22761e-07	1.44118e-07	1.35123e-07	1.2289e-07
1561.23	8.25	3.16581e-07	3.09454e-07	3.31137e-07	2.26646e-07	2.82926e-07	2.3182e-07	3.23634e-07	2.88077e-07	3.64888e-07	8.70294e-08	2.25232e-07	2.22156e-07	2.11261e-07
1569.65	8.25	0.000119454	0.000116362	0.000113253	0.000110145	0.000106983	0.000103757	0.000100562	9.73744e-05	9.37916e-05	9.01434e-05	8.64116e-05	8.26742e-05	7.8861e-05
1578.06	8.25	0.000134854	0.000131667	0.000128398	0.000125083	0.000121751	0.000118339	0.000114986	0.0001113	0.000107676	0.000103713	9.96676e-05	9.55823e-05	9.14016e-05
1586.48	8.25	1.72574e-05	1.67472e-05	1.62706e-05	1.57198e-05	1.52254e-05	1.46943e-05	1.41832e-05	1.34997e-05	1.31247e-05	1.24646e-05	1.188e-05	1.12949e-05	1.06958e-05
1594.9	8.25	7.64306e-06	7.36292e-06	7.13763e-06	6.90649e-06	6.62869e-06	6.33779e-06	6.18985e-06	6.01988e-06	5.7025e-06	5.4101e-06	5.13958e-06	4.87925e-06	4.60802e-06
1603.31	8.25	0.000158167	0.000154433	0.000150707	0.000146814	0.00014301	0.000139106	0.000135069	0.000130902	0.000126578	0.000121967	0.000117196	0.000112365	0.000107413
1611.73	8.25	0.000109608	0.000106848	0.000104042	0.000101208	9.82933e-05	9.53305e-05	9.24915e-05	8.95842e-05	8.63795e-05	8.30217e-05	7.95821e-05	7.6099e-05	7.25549e-05
1620.15	8.25	1.06431e-05	1.02516e-05	9.86238e-06	9.48736e-06	9.11959e-06	8.71212e-06	8.34204e-06	7.98688e-06	7.62901e-06	7.16328e-06	6.76311e-06	6.35413e-06	5.95249e-06
1628.56	8.25	3.2418e-06	3.14438e-06	3.05166e-06	2.96713e-06	2.92073e-06	2.76869e-06	2.82189e-06	2.71975e-06	2.48572e-06	2.43139e-06	2.32221e-06	2.22401e-06	2.10409e-06
1636.98	8.25	9.05323e-06	8.79922e-06	8.61126e-06	8.3525e-06	8.06203e-06	7.79579e-06	7.56368e-06	7.46641e-06	7.07445e-06	6.76005e-06	6.47742e-06	6.19009e-06	5.86501e-06
1645.4	8.25	2.70281e-05	2.64727e-05	2.57879e-05	2.51735e-05	2.47046e-05	2.39466e-05	2.33534e-05	2.27209e-05	2.19625e-05	2.11721e-05	2.03837e-05	1.95579e-05	1.8709e-05
1653.81	8.25	1.17841e-05	1.14475e-05	1.11138e-05	1.07941e-05	1.04134e-05	1.00712e-05	9.89462e-06	9.38002e-06	9.14638e-06	8.77165e-06	8.37602e-06	7.9861e-06	7.56819e-06
1662.23	8.25	2.01373e-06	1.95827e-06	1.85222e-06	1.72088e-06	1.79084e-06	1.71973e-06	1.53148e-06	1.58692e-06	1.47322e-06	1.39071e-06	1.35564e-06	1.27061e-06	1.22931e-06
1670.65	8.25	8.00109e-07	7.51732e-07	7.46138e-07	6.65334e-07	6.67659e-07	6.7086e-07	6.89148e-07	6.18781e-07	5.89882e-07	5.62519e-07	5.42918e-07	4.9061e-07	4.88339e-07
1679.06	8.25	1.94749e-07	1.66405e-07	2.16441e-07	1.93229e-07	1.4325e-07	2.60475e-07	3.63356e-07	1.65991e-07	1.48658e-07	1.40759e-07	1.37237e-07	1.33633e-07	1.42036e-07
1687.48	8.25	2.86887e-08	1.6562e-08	8.03024e-08	6.47347e-08	9.31546e-08	1.27845e-07	5.80017e-08	7.15052e-08	5.21375e-08	4.67142e-08	4.68635e-08	8.04307e-08	2.16318e-08
1695.9	8.25	1.93522e-08	0	3.75064e-08	4.82732e-08	0	3.09518e-08	0	3.48266e-09	1.10129e-08	1.39876e-08	1.81859e-08	2.366e-08	8.62453e-09
1704.31	8.25	4.10123e-09	3.35571e-08	3.34918e-08	0	0	0	1.24188e-09	2.81802e-09	4.76139e-09	1.46863e-08	-7.08338e-10	-1.56488e-08	-1.62912e-08
1712.73	8.25	0	4.54899e-08	6.11417e-08	0	3.80458e-08	0	5.26491e-09	1.00575e-08	1.39752e-08	2.9131e-08	2.01484e-08	-7.42573e-09	-2.60906e-09
1721.15	8.25	-1.45837e-24	8.02246e-09	0	0	2.22875e-08	0	5.30933e-09	4.45974e-09	2.61165e-08	0	-4.64024e-10	1.88718e-09	5.63743e-09
1729.56	8.25	0	0	0	9.15721e-09	4.54749e-09	1.0725e-08	-2.18819e-09	7.81633e-09	-6.86864e-10	-1.37742e-08	7.32534e-09	-1.38419e-09	6.42562e-09
1737.98	8.25	0	3.80873e-08	0	0	3.11746e-08	0	3.44075e-09	1.05745e-08	-1.47548e-09	-4.38013e-09	0	2.13363e-24	0
1746.4	8.25	0	0	0	0	0	0	-1.54869e-09	0	3.51512e-09	0	0	0	0
1754.81	8.25	1.97704e-07	1.59523e-07	1.13328e-07	5.67779e-08	1.18411e-07	2.4323e-07	1.35221e-07	1.25353e-07	1.22436e-07	1.17059e-07	1.02552e-07	7.99466e-08	9.60084e-08
1763.23	8.25	5.41863e-08	6.46793e-08	1.6325e-07	1.71214e-07	2.75652e-08	1.64466e-07	8.76718e-08	7.31454e-08	9.33004e-08	6.75e-08	9.48301e-08	6.86806e-08	4.08047e-08
1771.65	8.25	3.51458e-08	1.76941e-08	1.40623e-08	1.04293e-07	3.78844e-08	6.03717e-09	1.88659e-08	1.92335e-08	1.42041e-08	1.80092e-08	2.38589e-08	3.92685e-08	2.21538e-08
1780.06	8.25	0	0	0	0	0	6.63979e-09	0	3.2378e-09	1.9367e-08	8.45355e-09	6.39992e-09	3.48504e-08	0
1788.48	8.25	1.96743e-07	7.33326e-08	1.249e-07	7.76e-08	2.88966e-08	1.91792e-07	1.0856e-07	9.57679e-08	9.46428e-08	1.08531e-07	1.01383e-07	1.2918e-07	6.7411e-08
1796.9	8.25	1.04746e-07	5.63749e-08	1.26974e-07	2.69357e-08	5.10463e-08	3.83965e-08	2.73302e-08	5.69276e-08	5.23874e-08	2.58627e-08	5.67931e-08	1.12296e-08	2.01555e-08
1805.31	8.25	5.94411e-09	5.30623e-09	5.65656e-09	4.52543e-09	3.00284e-08	2.00807e-08	3.04825e-08	2.03787e-08	0	4.99585e-08	1.93813e-08	0	0
1813.73	8.25	1.09486e-09	0	2.46347e-09	0	0	0	0	1.17912e-08	0	0	7.59275e-09	0	1.22827e-08
1822.15	8.25	0	0	0	0	0	0	0	0	1.51923e-08	0	0	0	0
1830.56	8.25	0	0	0	0	0	0	0	0	0	0	0	0	0
1838.98	8.25	0	0	0	0	0	0	0	0	0	0	0	0	0
1847.4	8.25	0	0	0	0	3.36926e-09	0	0	0	0	0	0	0	0
1855.82	8.25	0	0	0	0	0	0	0	0	0	4.04724e-08	0	0	0
1864.23	8.25	2.92197e-08	0	3.9898e-08	0	5.10361e-08	0	4.21814e-08	6.45107e-08	0	3.24005e-08	0	0	0
1872.65	8.25	3.46413e-06	3.41821e-06	3.40904e-06	3.49514e-06	3.45317e-06	3.48774e-06	3.57925e-06	3.48877e-06	3.4864e-06	3.45884e-06	3.34222e-06	3.30709e-06	3.28076e-06
1881.07	8.25	3.95942e-05	3.9223e-05	3.88154e-05	3.8396e-05	3.79303e-05	3.73622e-05	3.6671e-05	3.59416e-05	3.50712e-05	3.41782e-05	3.30398e-05	3.19442e-05	3.07081e-05
1889.48	8.25	9.07621e-06	8.95813e-06	8.76276e-06	8.64491e-06	8.48821e-06	8.25888e-06	8.05242e-06	7.82485e-06	7.5205e-06	7.25088e-06	6.98812e-06	6.64538e-06	6.33685e-06
1897.9	8.25	1.46982e-06	1.46683e-06	1.42049e-06	1.36125e-06	1.29302e-06	1.24081e-06	1.3289e-06	1.1354e-06	1.15576e-06	1.1389e-06	1.00173e-06	9.92863e-07	8.98815e-07
1906.32	8.25	4.21039e-07	4.83755e-07	4.3267e-07	4.62056e-07	4.14615e-07	4.72589e-07	4.12346e-07	4.28325e-07	3.27961e-07	3.53555e-07	4.23709e-07	3.84166e-07	3.65446e-07
1914.73	8.25	2.59224e-07	2.331e-07	2.46758e-07	2.17463e-07	2.16813e-07	2.17319e-07	2.50751e-07	2.16981e-07	1.91172e-07	2.50093e-07	1.41721e-07	2.13924e-07	1.55023e-07
1923.15	8.25	3.18746e-07	2.83928e-07	3.25151e-07	2.74829e-07	2.95046e-07	2.55136e-07	2.71764e-07	2.3148e-07	2.00307e-07	2.24159e-07	1.84888e-07	1.33872e-07	1.48339e-07
1931.57	8.25	1.08053e-06	1.00127e-06	9.60428e-07	9.11982e-07	8.2578e-07	8.01481e-07	8.00487e-07	7.30663e-07	6.8663e-07	6.31484e-07	5.86268e-07	5.21105e-07	5.45712e-07
1939.98	8.25	6.25103e-05	5.95453e-05	5.66504e-05	5.3713e-05	5.09027e-05	4.80288e-05	4.5248e-05	4.24484e-05	3.94788e-05	3.65435e-05	3.34941e-05	3.04794e-05	2.76263e-05
1948.4	8.25	0.000493951	0.000480775	0.000467258	0.000453268	0.0004388	0.000424113	0.000408852	0.000392608	0.000375274	0.000356437	0.000336316	0.000315784	0.000294654
1956.82	8.25	0.00111377	0.00108892	0.00106285	0.00103535	0.00100638	0.000975977	0.000943946	0.000909283	0.000871782	0.00083044	0.000785757	0.000739223	0.000692069
1965.23	8.25	0.000850831	0.000828591	0.000805839	0.000782552	0.000758602	0.000734153	0.000708985	0.000682155	0.000653343	0.000621754	0.000587987	0.000552891	0.000517023
1973.65	8.25	0.000288742	0.000281209	0.000273548	0.000265728	0.000257734	0.00024968	0.000241478	0.000232769	0.000223392	0.000213069	0.000202054	0.000190616	0.00017876
1982.07	8.25	4.86028e-05	4.71982e-05	4.58505e-05	4.44274e-05	4.30219e-05	4.15745e-05	4.01011e-05	3.85835e-05	3.69298e-05	3.50701e-05	3.31571e-05	3.10691e-05	2.89696e-05
1990.48	8.25	3.73984e-05	3.62329e-05	3.52291e-05	3.41678e-05	3.31151e-05	3.20387e-05	3.09492e-05	2.97757e-05	2.85369e-05	2.71968e-05	2.57393e-05	2.42697e-05	2.27112e-05
1998.9	8.25	0.000873738	0.000856013	0.000837639	0.000818534	0.000798513	0.00077767	0.000755709	0.00073193	0.000705805	0.000676638	0.000644393	0.00061035	0.000574678
2007.32	8.25	0.00207523	0.00202221	0.00196737	0.00191039	0.0018511	0.00178918	0.00172415	0.00165461	0.00157938	0.00149703	0.00140776	0.00131527	0.00122247
2015.73	8.25	0.00190722	0.00184926	0.00179031	0.00173008	0.00166831	0.00160524	0.00154013	0.00147116	0.0013976	0.00131789	0.00123297	0.00114588	0.00105848
2024.15	8.25	0.000628594	0.000609997	0.000591289	0.000572405	0.000553196	0.000533964	0.000514352	0.000493617	0.000471439	0.000447065	0.000421175	0.000394382	0.00036647
2032.57	8.25	0.000236049	0.000229119	0.000222234	0.000215277	0.000208256	0.000201277	0.000194147	0.000186635	0.000178554	0.000169647	0.000160184	0.000150403	0.00014007
2040.98	8.25	0.000246153	0.000240673	0.000235083	0.000229359	0.000223491	0.000217566	0.00021147	0.000204963	0.000197853	0.000189841	0.000181196	0.000172019	0.000162202
2049.4	8.25	0.000573408	0.000558982	0.000544365	0.000529479	0.000514235	0.00049883	0.000482973	0.000466099	0.000447706	0.00042731	0.000405173	0.000381998	0.000357412
2057.82	8.25	0.000694243	0.000677741	0.000661025	0.000643874	0.000626201	0.000608282	0.000589729	0.000569836	0.000548051	0.000523755	0.000497261	0.000469421	0.000439836
2066.23	8.25	0.000707324	0.00068857	0.000669579	0.000650246	0.0006306	0.000610805	0.00059039	0.000568751	0.00054526	0.000519254	0.000491164	0.000461751	0.000430745
2074.65	8.25	0.00045818	0.000445754	0.000433219	0.000420471	0.000407514	0.000394465	0.00038123	0.000367067	0.000351775	0.000334776	0.000316563	0.000297456	0.000277123
2083.07	8.25	0.00024206	0.000235116	0.00022817	0.000221175	0.000214083	0.000206982	0.000199814	0.000192177	0.000184012	0.000174863	0.000165268	0.000155049	0.000144341
2091.48	8.25	0.000144244	0.000139785	0.00013536	0.00013093	0.000126453	0.000122023	0.000117529	0.000112782	0.000107719	0.000102182	9.62255e-05	9.00166e-05	8.34532e-05
2099.9	8.25	5.15093e-05	5.00444e-05	4.86081e-05	4.71641e-05	4.56904e-05	4.42276e-05	4.27261e-05	4.11553e-05	3.95191e-05	3.75928e-05	3.57479e-05	3.35399e-05	3.13025e-05
2108.32	8.25	2.13806e-05	2.07759e-05	2.02511e-05	1.96934e-05	1.91532e-05	1.85713e-05	1.8023e-05	1.74244e-05	1.68317e-05	1.61062e-05	1.52394e-05	1.44515e-05	1.35685e-05
2116.73	8.25	1.44873e-05	1.42183e-05	1.38342e-05	1.34616e-05	1.30708e-05	1.26248e-05	1.22125e-05	1.1839e-05	1.13253e-05	1.08023e-05	1.02619e-05	9.61647e-06	9.09729e-06
2125.15	8.25	2.44727e-06	2.37477e-06	2.30998e-06	2.24645e-06	2.19842e-06	2.11738e-06	2.07703e-06	1.9855e-06	1.91331e-06	1.78987e-06	1.68727e-06	1.58959e-06	1.39669e-06
2133.57	8.25	1.47583e-06	1.43444e-06	1.38421e-06	1.31981e-06	1.28928e-06	1.23465e-06	1.18451e-06	1.12253e-06	1.0513e-06	1.03459e-06	9.29277e-07	8.63024e-07	8.75778e-07
2141.98	8.25	1.81758e-06	1.81594e-06	1.75829e-06	1.70993e-06	1.64346e-06	1.62126e-06	1.59836e-06	1.54346e-06	1.53964e-06	1.47887e-06	1.49598e-06	1.37985e-06	1.27279e-06
2150.4	8.25	1.66482e-05	1.63194e-05	1.59656e-05	1.56236e-05	1.52413e-05	1.48798e-05	1.4503e-05	1.4127e-05	1.36139e-05	1.31737e-05	1.25221e-05	1.20269e-05	1.1226e-05
2158.82	8.25	9.88391e-06	9.65645e-06	9.46124e-06	9.2444e-06	9.06126e-06	8.84467e-06	8.62348e-06	8.41874e-06	8.12488e-06	7.87941e-06	7.45118e-06	7.09016e-06	6.84857e-06
2167.23	8.25	7.60843e-06	7.41933e-06	7.23732e-06	7.05431e-06	6.87674e-06	6.69427e-06	6.48412e-06	6.23825e-06	6.06965e-06	5.76435e-06	5.52578e-06	5.21974e-06	4.82427e-06
2175.65	8.25	2.12881e-06	2.05603e-06	2.00725e-06	1.96502e-06	1.90133e-06	1.86488e-06	1.79604e-06	1.75845e-06	1.72689e-06	1.55506e-06	1.48114e-06	1.4642e-06	1.36128e-06
2184.07	8.25	5.27792e-07	5.09066e-07	4.95281e-07	4.95934e-07	4.25079e-07	4.83953e-07	4.79203e-07	4.17283e-07	4.26117e-07	4.27723e-07	4.20428e-07	3.1895e-07	3.3005e-07
2192.48	8.25	5.81291e-07	5.62916e-07	5.39376e-07	5.35548e-07	5.47146e-07	5.18922e-07	4.85325e-07	4.75687e-07	4.59892e-07	3.9101e-07	4.43377e-07	4.15665e-07	2.19197e-07
2200.9	8.25	1.08092e-07	9.55142e-08	8.47926e-08	7.24599e-08	6.36697e-08	6.74601e-08	7.83563e-08	5.17523e-08	9.69173e-08	6.14746e-08	6.36185e-08	9.80206e-08	1.85582e-07
2209.32	8.25	2.08085e-07	2.05834e-07	1.85152e-07	2.03143e-07	1.89279e-07	1.94246e-07	1.59289e-07	1.30784e-07	1.49879e-07	5.03564e-08	6.9266e-08	3.25294e-08	7.03737e-08
2217.73	8.25	1.36361e-07	1.54561e-07	1.26632e-07	1.48972e-07	1.38252e-07	1.99885e-07	1.07708e-07	1.01234e-07	1.17492e-07	1.99026e-07	1.39797e-07	1.58889e-08	2.14063e-08
2226.15	8.25	1.63848e-07	1.69307e-07	1.36578e-07	1.41288e-07	1.50506e-07	1.96296e-07	1.12939e-07	9.14706e-08	6.42407e-08	7.62781e-08	8.20811e-08	1.76817e-07	1.134e-07
2234.57	8.25	6.2698e-08	5.70694e-08	1.87155e-08	7.74985e-08	3.10227e-08	1.4765e-08	1.32201e-08	5.70227e-08	6.6707e-08	7.35317e-09	3.06508e-08	6.22025e-08	-1.72558e-23
2242.98	8.25	5.5298e-08	2.22823e-08	3.78395e-08	3.69147e-08	1.97023e-08	4.43792e-08	5.07646e-08	2.68318e-08	3.49681e-08	3.22697e-08	5.88033e-09	0	5.29607e-08
2251.4	8.25	1.64069e-07	1.40282e-07	1.40078e-07	1.43228e-07	1.17377e-07	1.11756e-07	9.38224e-08	1.02553e-07	1.28292e-07	1.89769e-08	6.07979e-08	9.86032e-08	1.3483e-07
2259.82	8.25	1.0142e-07	1.55244e-07	1.14928e-07	6.96098e-08	1.32748e-07	1.13215e-07	5.60416e-08	5.70186e-08	9.39983e-08	1.57399e-07	1.76021e-07	5.44003e-08	2.90868e-08
2268.23	8.25	3.68835e-08	2.54144e-08	3.98024e-08	1.3406e-08	3.92867e-08	1.22323e-09	1.57705e-08	2.46738e-08	3.76033e-08	7.05226e-08	5.43599e-09	2.69581e-08	6.46225e-08
2276.65	8.25	6.66893e-08	8.16323e-08	6.98259e-08	5.2984e-08	5.24595e-08	5.7887e-08	3.18694e-08	1.24809e-07	1.83893e-08	6.63133e-08	9.04806e-08	5.92663e-08	8.25766e-09
2285.07	8.25	6.4575e-09	3.58984e-08	0	1.09128e-08	1.06177e-08	8.18366e-09	1.87622e-08	0	0	5.28211e-08	0	5.75102e-08	-3.3421e-08
2293.48	8.25	3.4249e-09	4.39901e-08	8.57602e-09	1.10416e-23	1.77214e-08	0	0	0	2.47104e-08	0	0	0	0
2301.9	8.25	0	1.78407e-08	6.70379e-09	0	0	-1.3254e-08	0	0	0	0	0	0	0
2310.32	8.25	0	0	0	1.62101e-08	-1.07691e-08	2.25729e-08	0	0	0	0	-1.66543e-08	0	0
2318.73	8.25	0	0	0	0	9.57822e-09	0	0	0	0	0	0	0	0
2327.15	8.25	0	0	0	0	0	0	0	0	0	0	0	0	0
2335.57	8.25	5.84189e-09	0	0	0	9.66827e-09	0	0	0	0	0	0	-3.65453e-08	-1.25759e-08
2343.98	8.25	0	0	0	0	0	0	0	0	0	0	0	0	1.28875e-08
2352.4	8.25	6.23377e-09	0	0	0	0	0	0	0	0	0	0	0	0
2360.82	8.25	0	0	8.91719e-09	0	0	0	2.83299e-08	0	0	0	-6.91316e-08	0	8.93759e-09
2369.23	8.25	1.47133e-09	2.31864e-08	0	0	0	0	0	0	0	-1.56705e-08	0	0	0
2377.65	8.25	0	0	0	0	2.98195e-08	0	0	0	0	0	0	-8.33621e-08	0
2386.07	8.25	0	0	1.72652e-08	5.9436e-09	0	0	1.69079e-08	0	0	0	0	0	2.28505e-08
2394.48	8.25	-1.39114e-08	0	2.96306e-08	0	0	0	0	0	0	0	0	0	4.89908e-09
2402.9	8.25	0	0	0	0	0	0	0	0	0	0	0	0	-6.98222e-09
2411.32	8.25	-8.59728e-09	9.20057e-09	0	1.21224e-08	2.1574e-08	0	0	0	1.69732e-08	0	0	0	-3.02079e-09
2419.73	8.25	0	1.92591e-08	0	0	0	1.09134e-08	0	0	0	0	0	0	-5.24723e-09
2428.15	8.25	0	0	0	0	0	0	0	0	-6.09958e-08	0	0	0	-4.73183e-09
2436.57	8.25	1.06311e-08	1.179e-08	2.61084e-08	0	0	0	0	0	0	0	2.75101e-23	0	-1.68704e-09
2444.98	8.25	0	0	0	0	0	0	0	0	0	0	0	0	7.82689e-09
2453.4	8.25	0	0	0	0	0	0	-3.88192e-24	1.32703e-08	0	4.10056e-08	0	0	-1.02294e-08
2461.82	8.25	0	0	0	2.63059e-08	0	0	4.49824e-08	0	0	0	0	3.00371e-23	1.6444e-08
2470.23	8.25	1.33563e-08	6.73155e-08	7.88208e-08	4.56617e-08	8.64005e-08	4.17643e-08	5.32057e-08	3.09489e-08	0	1.09101e-07	6.51797e-09	3.59823e-08	3.77385e-24
2478.65	8.25	1.77406e-07	2.12696e-07	1.96449e-07	1.74067e-07	1.63654e-07	2.08382e-07	1.49038e-07	1.96096e-07	1.26737e-07	9.9958e-08	1.28924e-07	1.37622e-07	8.52997e-08
2487.07	8.25	3.73359e-06	3.646e-06	3.56234e-06	3.41693e-06	3.29893e-06	3.17388e-06	2.96072e-06	3.00842e-06	2.82462e-06	2.63112e-06	2.57124e-06	2.25082e-06	2.08316e-06
2495.48	8.25	1.36677e-06	1.24929e-06	1.29178e-06	1.2094e-06	1.1685e-06	1.00775e-06	1.09119e-06	1.06774e-06	9.95795e-07	8.85582e-07	8.41726e-07	8.27902e-07	7.3135e-07
2503.9	8.25	1.11764e-06	1.03477e-06	1.00481e-06	1.01684e-06	1.04022e-06	9.026e-07	9.26719e-07	7.85758e-07	9.19516e-07	8.2001e-07	8.10201e-07	6.99069e-07	6.5058e-07
2512.32	8.25	9.85909e-07	1.02428e-06	9.81757e-07	9.9485e-07	8.65794e-07	1.06215e-06	8.61423e-07	1.05277e-06	6.40966e-07	9.64099e-07	7.56459e-07	7.06652e-07	6.46615e-07
2520.73	8.25	8.15309e-07	6.64781e-07	6.92577e-07	7.2204e-07	7.63575e-07	6.41016e-07	6.30597e-07	5.61393e-07	4.41936e-07	5.20184e-07	5.22698e-07	4.7738e-07	4.51574e-07

## Sheet: k_GF5
Wavelength	FWHM	k_Summer_L	k_Summer_M	k_Summer_H	k_Winter_L	k_Winter_M	k_Winter_H	k_1976_L	k_1976_M	k_1976_H
1004.77	7.67828	0	0	0	0	0	0	0	0	0	0	0	0	0
1013.2	7.68189	0	0	0	0	0	0	0	0	0	0	0	0	0
1021.62	7.68551	0	0	0	0	0	0	0	0	0	0	0	0	0
1030.05	7.68912	0	0	0	0	0	0	0	0	0	0	0	0	0
1038.48	7.69273	5.13046e-07	4.97269e-07	4.78707e-07	4.60249e-07	4.60753e-07	4.64307e-07	4.38267e-07	4.20008e-07	4.0668e-07	3.87472e-07	3.99886e-07	3.65734e-07	3.38713e-07
1046.91	7.69634	5.39748e-07	5.23611e-07	5.21038e-07	5.13735e-07	4.80808e-07	4.60737e-07	4.56192e-07	4.3903e-07	4.33501e-07	4.08081e-07	3.95745e-07	3.63612e-07	3.57905e-07
1055.33	7.69995	5.16747e-07	5.02826e-07	5.24942e-07	4.86613e-07	4.65611e-07	4.63222e-07	4.29115e-07	4.12123e-07	3.90613e-07	4.098e-07	3.69107e-07	3.7823e-07	3.44338e-07
1063.76	7.70356	2.34131e-07	2.26363e-07	2.09935e-07	2.04505e-07	2.05183e-07	1.77666e-07	2.0617e-07	1.7099e-07	1.80362e-07	1.86083e-07	1.55817e-07	1.49631e-07	1.51322e-07
1072.19	7.70718	4.55532e-08	2.39427e-08	3.88085e-08	2.66093e-08	2.08696e-08	2.39928e-08	4.00424e-08	1.42435e-08	1.35338e-08	3.07727e-08	2.31423e-08	1.63235e-08	2.49986e-08
1080.62	7.71079	5.43973e-25	2.92045e-09	0	5.19175e-09	8.06138e-09	0	3.73242e-09	0	0	0	4.38112e-09	0	-5.17291e-09
1089.04	7.7144	0	0	0	0	6.23537e-09	0	0	0	0	0	0	0	0
1097.47	7.71801	0	3.23732e-09	0	0	5.12758e-09	0	-5.15587e-09	0	0	-5.36319e-09	0	0	0
1105.9	7.72162	0	0	0	0	0	0	0	0	0	0	0	0	0
1114.32	7.72523	0	4.08497e-09	4.41864e-10	0	2.09553e-09	0	3.90953e-09	0	0	3.3168e-09	0	0	0
1122.75	7.72885	0	0	0	0	0	0	0	0	0	0	0	0	0
1131.18	7.73246	0	0	0	0	1.10293e-08	0	0	0	0	1.41885e-09	0	7.48619e-09	0
1139.61	7.73607	0	0	0	0	0	0	0	0	0	0	0	0	0
1148.03	7.73968	0	0	0	0	0	0	0	0	0	0	0	0	0
1156.46	7.74329	0	0	0	0	0	0	0	0	0	0	0	0	0
1164.89	7.7469	0	0	0	0	0	0	0	0	0	0	0	0	0
1173.32	7.75052	0	0	0	0	0	0	0	0	0	0	0	0	0
1181.74	7.75413	0	0	0	0	0	0	0	0	0	0	0	0	0
1190.17	7.75774	0	0	0	0	0	0	0	0	0	0	0	0	0
1198.6	7.76135	4.08561e-09	0	0	0	0	2.30954e-09	0	0	0	2.95817e-09	0	0	0
1206.8	7.3271	3.44264e-05	3.36458e-05	3.28211e-05	3.20497e-05	3.12064e-05	3.03854e-05	2.95657e-05	2.8753e-05	2.78455e-05	2.68762e-05	2.59931e-05	2.50206e-05	2.41175e-05
1215.2	7.76857	6.71347e-06	6.53452e-06	6.31688e-06	6.16621e-06	5.94282e-06	5.73461e-06	5.59144e-06	5.44769e-06	5.18206e-06	4.92995e-06	4.82202e-06	4.53742e-06	4.40018e-06
1223.6	8.1949	1.53036e-05	1.49361e-05	1.45384e-05	1.41451e-05	1.37837e-05	1.34201e-05	1.30033e-05	1.26202e-05	1.21977e-05	1.18176e-05	1.13217e-05	1.08678e-05	1.05017e-05
1232.34	8.48475	1.32823e-06	1.26359e-06	1.23166e-06	1.20763e-06	1.15136e-06	1.12721e-06	1.046e-06	1.02821e-06	1.0068e-06	9.51728e-07	8.84044e-07	8.9181e-07	8.26614e-07
1240.76	8.26	2.98434e-07	3.64128e-07	3.16057e-07	3.24419e-07	2.92403e-07	3.07401e-07	3.02918e-07	2.80694e-07	2.76025e-07	2.3665e-07	2.70232e-07	2.32968e-07	1.93445e-07
1249.21	7.78302	1.16258e-07	1.09028e-07	1.33815e-07	9.59618e-08	8.66718e-08	8.74126e-08	7.19046e-08	1.23704e-07	1.22954e-07	9.24626e-08	4.67877e-08	9.25297e-08	1.5569e-07
1257.66	7.78663	1.69072e-07	1.22633e-07	1.31591e-07	1.89623e-07	1.19016e-07	1.1838e-07	1.30593e-07	1.7514e-07	1.38582e-07	8.98999e-08	1.59801e-07	8.82823e-08	1.27728e-07
1266.1	7.79024	1.7837e-07	1.72694e-07	1.86387e-07	1.95104e-07	1.74532e-07	1.63476e-07	1.48769e-07	1.75258e-07	8.22858e-08	1.41709e-07	1.22691e-07	2.08644e-07	6.01928e-08
1274.55	7.79386	5.30427e-09	7.08662e-09	0	6.18606e-09	0	0	0	0	0	0	0	2.27713e-08	0
1283	7.79747	2.21862e-08	3.85559e-08	2.78236e-08	3.49739e-08	1.57494e-08	3.65488e-08	2.35904e-08	1.94702e-08	2.04742e-08	0	0	0	0
1291.45	7.80108	1.86681e-06	1.7936e-06	1.76035e-06	1.67541e-06	1.65127e-06	1.59283e-06	1.56306e-06	1.5093e-06	1.47876e-06	1.47855e-06	1.32447e-06	1.23126e-06	1.27832e-06
1299.9	7.80469	3.02434e-07	3.1861e-07	3.07658e-07	2.70788e-07	2.51519e-07	2.29676e-07	2.42607e-07	2.67493e-07	2.2751e-07	1.85008e-07	1.7889e-07	1.91818e-07	1.61536e-07
1308.34	7.8083	1.48616e-08	1.68147e-08	2.66136e-08	2.44576e-08	2.93115e-08	1.3449e-08	4.76866e-08	1.79268e-08	4.13412e-08	2.04531e-08	4.42645e-08	4.41926e-09	1.85223e-08
1316.79	7.81191	6.99209e-06	6.78968e-06	6.61313e-06	6.42233e-06	6.28345e-06	6.12735e-06	5.97577e-06	5.71782e-06	5.55368e-06	5.37313e-06	5.13558e-06	5.01944e-06	4.69216e-06
1325.24	7.81553	6.41771e-07	6.30323e-07	5.84293e-07	5.87971e-07	5.82877e-07	5.55816e-07	5.26249e-07	5.10146e-07	4.14953e-07	4.83656e-07	4.5121e-07	5.185e-07	3.95389e-07
1333.69	7.81914	5.86415e-07	4.97441e-07	5.48871e-07	4.79691e-07	4.47111e-07	4.78604e-07	4.92273e-07	4.71443e-07	3.82157e-07	4.24704e-07	4.40431e-07	4.12891e-07	3.65515e-07
1342.14	7.82275	2.47685e-06	2.39597e-06	2.31752e-06	2.29852e-06	2.16791e-06	2.13952e-06	2.00216e-06	2.04279e-06	2.03697e-06	1.89048e-06	1.76641e-06	1.74778e-06	1.67691e-06
1350.58	7.82636	1.27024e-07	2.24506e-07	1.85728e-07	1.09776e-07	1.48538e-07	1.01413e-07	1.84293e-07	7.64381e-08	1.3284e-07	1.09908e-07	1.25056e-07	6.97941e-08	6.32711e-08
1359.03	7.82997	2.19133e-08	1.09124e-08	5.63964e-09	0	1.16717e-08	1.38851e-08	1.06371e-08	7.06861e-09	5.01424e-09	1.48613e-08	1.66313e-08	7.91456e-09	8.73535e-09
1367.48	7.83358	7.83341e-08	7.4336e-08	6.0288e-08	7.6462e-08	7.02939e-08	9.68145e-08	8.94268e-08	8.37229e-08	6.76906e-08	7.94455e-08	6.99593e-08	6.38201e-08	8.03656e-08
1375.93	7.8372	1.14478e-07	9.33747e-08	1.27046e-07	6.90977e-08	1.42676e-07	9.80507e-08	1.69118e-07	9.75338e-08	1.2047e-07	1.22372e-07	1.06362e-07	1.10051e-07	1.08736e-07
1384.37	7.84081	9.62622e-09	1.24826e-08	2.47582e-24	1.09478e-08	0	9.21697e-09	1.08719e-08	1.55651e-08	0	1.27118e-08	0	1.70853e-08	6.31252e-09
1392.82	7.84442	2.40329e-09	4.69564e-09	0	0	0	0	2.64743e-09	0	3.61057e-09	1.64173e-09	5.72636e-09	8.26235e-09	0
1401.27	7.84803	2.46381e-08	-5.59408e-09	2.56706e-09	4.91323e-09	0	0	0	0	8.82934e-09	0	0	0	0
1409.72	7.85164	3.58254e-09	0	0	0	0	0	0	0	0	0	0	0	0
1418.17	7.85525	0	0	3.021e-09	0	0	0	1.23815e-09	0	0	0	1.96018e-09	5.79527e-09	0
1426.61	7.85887	3.96886e-07	3.61297e-07	3.29174e-07	3.01947e-07	3.0723e-07	3.27408e-07	1.88442e-07	2.57979e-07	2.65e-07	1.669e-07	1.64154e-07	1.72037e-07	1.68285e-07
1435.06	7.86248	0.000234207	0.000230199	0.000225973	0.000221415	0.000216843	0.000211968	0.00020696	0.000201757	0.000196141	0.000190175	0.000184031	0.000177782	0.000171429
1443.51	7.86609	9.39149e-05	9.14774e-05	8.91139e-05	8.65265e-05	8.39367e-05	8.13631e-05	7.87181e-05	7.60789e-05	7.32632e-05	7.031e-05	6.74002e-05	6.44037e-05	6.14519e-05
1451.96	7.8697	6.44407e-06	6.2386e-06	6.00418e-06	5.81642e-06	5.50367e-06	5.32074e-06	5.07096e-06	4.83738e-06	4.62326e-06	4.36452e-06	4.10931e-06	3.9125e-06	3.67327e-06
1460.4	7.87331	2.85164e-07	2.53852e-07	1.89667e-07	1.90638e-07	1.67413e-07	2.37547e-07	1.33603e-07	9.52279e-08	1.77551e-07	1.22398e-07	1.17811e-07	1.34988e-07	1.08425e-07
1468.85	7.87692	3.3682e-06	3.31968e-06	3.27799e-06	3.14984e-06	3.11111e-06	3.04783e-06	2.97525e-06	2.8804e-06	2.79414e-06	2.7195e-06	2.60847e-06	2.50826e-06	2.41196e-06
1477.3	7.88054	7.57036e-06	7.44914e-06	7.28337e-06	7.12308e-06	7.05396e-06	6.82761e-06	6.67865e-06	6.40542e-06	6.29567e-06	6.12904e-06	5.88539e-06	5.68974e-06	5.49131e-06
1485.75	7.88415	1.29494e-06	1.2318e-06	1.15259e-06	1.21277e-06	1.15515e-06	1.06221e-06	1.03937e-06	9.68905e-07	9.91857e-07	8.99137e-07	9.02229e-07	8.04825e-07	7.5963e-07
1494.2	7.88776	2.54874e-06	2.50848e-06	2.47452e-06	2.31477e-06	2.26151e-06	2.21339e-06	2.15309e-06	2.06134e-06	2.00428e-06	1.90066e-06	1.83288e-06	1.78669e-06	1.68914e-06
1502.64	7.89137	3.61793e-07	4.42973e-07	3.91762e-07	4.16064e-07	3.45941e-07	3.45407e-07	3.71762e-07	3.12137e-07	3.2288e-07	3.03733e-07	2.68452e-07	2.76376e-07	2.53624e-07
1511.09	7.89498	9.03237e-09	0	1.14689e-08	0	0	3.10095e-08	0	1.22779e-08	-2.8624e-08	0	1.1144e-09	-8.54673e-10	4.3925e-09
1519.54	7.89859	7.20398e-08	1.37861e-07	4.60178e-08	1.30137e-07	5.38956e-08	1.10768e-07	7.1733e-08	8.7428e-08	3.4926e-08	6.78062e-08	5.22612e-08	4.22858e-08	4.25227e-08
1527.99	7.90221	5.13042e-06	5.01251e-06	4.86421e-06	4.76072e-06	4.56322e-06	4.39e-06	4.25126e-06	4.06381e-06	3.87824e-06	3.7813e-06	3.54077e-06	3.37736e-06	3.20991e-06
1536.43	7.90582	3.14015e-05	3.07184e-05	2.9974e-05	2.92622e-05	2.85504e-05	2.77377e-05	2.69777e-05	2.61738e-05	2.53336e-05	2.45164e-05	2.35774e-05	2.26632e-05	2.17247e-05
1544.88	7.90943	1.07388e-05	1.04803e-05	1.01906e-05	9.8977e-06	9.59311e-06	9.32273e-06	9.06326e-06	8.6968e-06	8.42612e-06	8.17285e-06	7.77868e-06	7.45363e-06	7.11099e-06
1553.33	6.6598	2.15246e-07	2.25567e-07	2.03981e-07	1.89059e-07	2.42928e-07	1.90304e-07	2.56377e-07	2.44952e-07	1.75892e-07	1.46758e-07	1.3504e-07	1.26424e-07	1.14264e-07
1560.93	8.4042	3.12967e-07	3.03226e-07	3.29327e-07	2.3295e-07	2.83659e-07	2.26975e-07	3.11191e-07	2.84679e-07	3.56084e-07	1.03217e-07	2.2791e-07	2.23379e-07	2.13586e-07
1569.23	7.8809	0.000102529	9.98224e-05	9.71157e-05	9.44006e-05	9.16619e-05	8.88124e-05	8.60481e-05	8.33079e-05	8.01626e-05	7.70023e-05	7.37885e-05	7.05549e-05	6.72533e-05
1577.61	7.45885	0.000139246	0.000135989	0.000132629	0.000129228	0.000125793	0.000122268	0.000118845	0.000115045	0.000111331	0.00010725	0.000103088	9.88833e-05	9.45773e-05
1586.31	7.4983	1.62773e-05	1.57876e-05	1.53274e-05	1.48051e-05	1.43245e-05	1.37988e-05	1.3328e-05	1.26524e-05	1.22824e-05	1.16559e-05	1.10909e-05	1.05321e-05	9.96084e-06
1594.96	7.7622	6.32205e-06	6.082e-06	5.89621e-06	5.70283e-06	5.47058e-06	5.20531e-06	5.1048e-06	4.98147e-06	4.68456e-06	4.45128e-06	4.2268e-06	4.01019e-06	3.78701e-06
1603.38	7.93471	0.000159456	0.000155693	0.000151949	0.00014802	0.000144196	0.000140262	0.000136202	0.000132012	0.000127658	0.000123013	0.000118211	0.000113348	0.000108358
1611.79	7.93832	0.000103683	0.000101042	9.83501e-05	9.56504e-05	9.28637e-05	9.00247e-05	8.73121e-05	8.45299e-05	8.14835e-05	7.82823e-05	7.50074e-05	7.16946e-05	6.83187e-05
1620.21	7.94194	1.06032e-05	1.02132e-05	9.82489e-06	9.4517e-06	9.08498e-06	8.67885e-06	8.30924e-06	7.95476e-06	7.59832e-06	7.13441e-06	6.73554e-06	6.32794e-06	5.92769e-06
1628.63	7.94555	3.3002e-06	3.19782e-06	3.10339e-06	3.0143e-06	2.97569e-06	2.81773e-06	2.8688e-06	2.75685e-06	2.51627e-06	2.47746e-06	2.3643e-06	2.26448e-06	2.14491e-06
1637.05	7.94916	9.23771e-06	8.97813e-06	8.7893e-06	8.51664e-06	8.23608e-06	7.95546e-06	7.71743e-06	7.62722e-06	7.22671e-06	6.90674e-06	6.61805e-06	6.32691e-06	5.99475e-06
1645.47	7.95277	2.57506e-05	2.52199e-05	2.45679e-05	2.39824e-05	2.35591e-05	2.28178e-05	2.22674e-05	2.16757e-05	2.09381e-05	2.01858e-05	1.94376e-05	1.8653e-05	1.7848e-05
1653.89	7.95638	1.09032e-05	1.05891e-05	1.02693e-05	9.97109e-06	9.60697e-06	9.28742e-06	9.13253e-06	8.62882e-06	8.42241e-06	8.06824e-06	7.70003e-06	7.33795e-06	6.94347e-06
1662.31	7.95999	2.01075e-06	1.95554e-06	1.84954e-06	1.71886e-06	1.78787e-06	1.71771e-06	1.52817e-06	1.5847e-06	1.47096e-06	1.38868e-06	1.35379e-06	1.26853e-06	1.22726e-06
1670.73	7.96361	7.48529e-07	6.96496e-07	6.87868e-07	6.09622e-07	6.01408e-07	6.16157e-07	6.70749e-07	5.78559e-07	5.52202e-07	5.23354e-07	5.089e-07	4.59505e-07	4.59186e-07
1679.15	7.96722	1.95726e-07	1.63655e-07	2.15186e-07	1.69475e-07	1.39776e-07	2.5036e-07	3.64212e-07	1.64812e-07	1.46817e-07	1.39152e-07	1.36312e-07	1.35463e-07	1.42093e-07
1687.57	7.97083	3.01294e-08	1.71328e-08	8.32529e-08	6.73062e-08	9.76252e-08	1.34648e-07	6.14442e-08	7.49518e-08	5.44115e-08	4.88848e-08	4.88866e-08	8.42056e-08	1.77521e-08
1695.99	7.97444	2.0123e-08	0	3.82509e-08	4.22076e-08	0	3.24536e-08	0	1.76984e-09	1.15096e-08	9.96709e-09	1.60406e-08	2.44184e-08	7.51277e-09
1704.41	7.97805	4.20793e-09	3.53801e-08	3.53058e-08	0	0	0	0	2.42309e-25	3.33391e-09	1.49145e-08	-1.85959e-09	-1.65376e-08	-1.697e-08
1712.83	7.98166	0	4.54685e-08	5.98891e-08	0	3.9012e-08	0	2.92568e-09	7.51377e-09	1.26425e-08	3.01161e-08	2.13474e-08	-9.12282e-09	-3.54342e-09
1721.25	7.98528	-1.68324e-24	7.92757e-09	0	0	2.22971e-08	0	5.28997e-09	4.5053e-09	2.62726e-08	0	-4.89489e-10	1.86483e-09	5.76674e-09
1729.67	7.98889	0	0	0	8.9423e-09	4.30356e-09	1.0261e-08	-2.04719e-09	7.84082e-09	-1.39576e-09	-1.36554e-08	7.07167e-09	-1.41024e-09	6.49742e-09
1738.08	7.9925	0	3.96909e-08	0	0	3.04878e-08	0	3.14204e-09	1.05619e-08	-1.51549e-09	1.3155e-09	0	4.26719e-24	0
1746.5	7.99611	0	0	0	0	0	0	-1.50478e-09	0	3.41524e-09	0	0	0	0
1754.92	7.99972	2.1286e-07	1.73226e-07	1.20768e-07	5.99127e-08	1.24663e-07	2.53434e-07	1.43193e-07	1.33752e-07	1.28501e-07	1.25549e-07	1.08965e-07	8.59974e-08	1.02447e-07
1763.34	8.00333	5.77307e-08	5.88226e-08	1.45386e-07	1.81285e-07	2.87426e-08	1.72593e-07	8.55812e-08	7.23952e-08	9.27929e-08	6.65629e-08	8.83551e-08	7.10942e-08	3.40187e-08
1771.76	8.00695	3.70696e-08	1.80589e-08	1.48196e-08	1.08331e-07	3.95306e-08	6.23392e-09	1.96992e-08	2.01641e-08	1.10519e-08	1.89048e-08	2.04822e-08	4.15e-08	2.35726e-08
1780.18	8.01056	0	0	0	0	0	6.88652e-09	0	3.61006e-09	1.96541e-08	9.43841e-09	5.96171e-09	3.63426e-08	0
1788.6	8.01417	1.96893e-07	7.36643e-08	1.25692e-07	7.73295e-08	2.86962e-08	1.92831e-07	1.08933e-07	9.59351e-08	9.49003e-08	1.08849e-07	1.01584e-07	1.30016e-07	6.74257e-08
1797.02	8.01778	1.0522e-07	5.60884e-08	1.27406e-07	2.68005e-08	5.10459e-08	3.83895e-08	2.73551e-08	5.69977e-08	5.22764e-08	2.59072e-08	5.69504e-08	1.09433e-08	2.0063e-08
1805.44	8.02139	5.88587e-09	5.20193e-09	5.54565e-09	4.57283e-09	3.02524e-08	2.00536e-08	3.04871e-08	2.05042e-08	0	5.03742e-08	1.92012e-08	0	0
1813.86	8.025	1.1047e-09	0	2.40242e-09	0	0	0	0	1.17766e-08	0	0	7.52201e-09	0	1.19761e-08
1822.28	8.02862	0	0	0	0	0	0	0	0	1.51229e-08	0	0	0	0
1830.7	8.03223	0	0	0	0	0	0	0	0	0	0	0	0	0
1839.12	8.03584	0	0	0	0	0	0	0	0	0	0	0	0	0
1847.54	8.03945	0	0	0	0	3.75742e-09	0	0	0	0	0	0	0	0
1855.96	8.04306	0	0	0	0	0	0	0	0	0	4.01942e-08	0	0	0
1864.38	8.04667	2.91751e-08	0	3.9693e-08	0	5.11351e-08	0	4.22714e-08	6.48409e-08	0	3.24027e-08	0	0	0
1872.79	8.05029	3.44828e-06	3.40173e-06	3.39248e-06	3.47816e-06	3.43651e-06	3.47212e-06	3.56344e-06	3.4731e-06	3.47054e-06	3.44312e-06	3.32591e-06	3.29113e-06	3.26605e-06
1881.21	8.0539	3.97212e-05	3.93504e-05	3.89421e-05	3.85223e-05	3.80568e-05	3.74885e-05	3.67965e-05	3.60662e-05	3.51944e-05	3.43007e-05	3.31603e-05	3.20625e-05	3.08236e-05
1889.63	8.05751	9.07467e-06	8.95676e-06	8.76167e-06	8.64381e-06	8.48736e-06	8.2583e-06	8.05174e-06	7.82474e-06	7.5211e-06	7.25119e-06	6.98881e-06	6.64611e-06	6.33839e-06
1898.05	8.06112	1.4681e-06	1.46558e-06	1.41873e-06	1.35956e-06	1.29227e-06	1.2397e-06	1.32844e-06	1.13479e-06	1.15479e-06	1.13771e-06	1.00087e-06	9.93681e-07	8.99814e-07
1906.47	8.06473	4.16495e-07	4.78083e-07	4.3053e-07	4.55694e-07	4.11256e-07	4.76602e-07	4.00385e-07	4.36325e-07	3.30811e-07	3.46899e-07	4.10995e-07	3.84498e-07	3.33171e-07
1914.89	8.06834	2.62535e-07	2.48378e-07	2.57839e-07	2.24945e-07	2.32459e-07	2.30548e-07	2.56971e-07	2.24339e-07	1.85557e-07	2.60375e-07	1.51255e-07	2.07468e-07	1.39187e-07
1923.31	8.07196	3.0698e-07	2.58863e-07	3.07404e-07	2.5962e-07	2.70863e-07	2.25409e-07	2.46034e-07	2.05421e-07	2.03906e-07	2.02609e-07	1.52925e-07	1.28598e-07	1.56677e-07
1931.73	8.07557	1.00875e-06	9.36772e-07	8.93025e-07	8.48496e-07	7.69077e-07	7.3891e-07	7.46405e-07	6.7893e-07	6.14746e-07	5.83652e-07	5.42992e-07	4.82752e-07	5.12944e-07
1940.15	8.07918	7.33321e-05	7.00809e-05	6.68641e-05	6.3589e-05	6.04205e-05	5.71819e-05	5.40109e-05	5.0768e-05	4.73657e-05	4.39387e-05	4.0362e-05	3.68275e-05	3.34537e-05
1948.57	8.08279	0.000493798	0.00048064	0.000467139	0.000453165	0.000438712	0.000424039	0.000408792	0.000392561	0.00037524	0.000356415	0.000336305	0.000315784	0.000294663
1956.99	8.0864	0.00111574	0.00109083	0.0010647	0.00103713	0.00100809	0.000977619	0.000945512	0.000910769	0.000873186	0.000831754	0.000786976	0.000740348	0.000693103
1965.41	8.09001	0.000851589	0.000829322	0.000806542	0.000783228	0.00075925	0.000734773	0.000709576	0.000682716	0.000653871	0.000622247	0.000588445	0.000553312	0.000517408
1973.83	8.09363	0.000273012	0.000266033	0.000258943	0.000251696	0.000244282	0.000236803	0.000229178	0.000221066	0.000212329	0.000202701	0.000192409	0.000181718	0.000170611
1982.25	8.09724	4.85135e-05	4.71111e-05	4.57646e-05	4.43434e-05	4.29398e-05	4.14945e-05	4.00233e-05	3.85082e-05	3.68572e-05	3.50005e-05	3.30909e-05	3.1006e-05	2.89103e-05
1990.67	8.10085	4.11885e-05	3.99075e-05	3.87795e-05	3.75923e-05	3.64152e-05	3.52125e-05	3.39962e-05	3.2689e-05	3.1304e-05	2.98146e-05	2.81852e-05	2.65409e-05	2.48359e-05
1999.09	8.10446	0.000989443	0.000969027	0.000947842	0.000925789	0.000902646	0.000878512	0.000853058	0.000825504	0.000795235	0.000761481	0.000724193	0.000684878	0.000643823
2007.5	8.10807	0.00204109	0.00198888	0.00193496	0.00187898	0.0018208	0.00176013	0.00169646	0.00162843	0.00155482	0.00147423	0.00138689	0.0012964	0.00120548
2015.92	8.11168	0.00190891	0.00185075	0.00179158	0.00173113	0.00166913	0.00160582	0.00154045	0.00147122	0.0013974	0.00131739	0.00123215	0.00114477	0.00105708
2024.34	8.1153	0.000623705	0.000605177	0.000586558	0.000567784	0.000548698	0.000529614	0.000510158	0.000489618	0.000467655	0.000443548	0.00041794	0.000391473	0.000363867
2032.76	8.11891	0.000233655	0.000226904	0.000220201	0.000213434	0.000206587	0.000199788	0.000192834	0.000185497	0.000177607	0.000168902	0.000159612	0.000150015	0.000139865
2041.18	8.12252	0.000250173	0.000244594	0.000238905	0.00023308	0.000227108	0.000221082	0.000214875	0.000208259	0.000201033	0.000192883	0.000184094	0.000174741	0.000164792
2049.6	8.12613	0.000573736	0.000559299	0.000544672	0.000529777	0.000514522	0.000499107	0.000483239	0.000466353	0.000447948	0.00042754	0.00040539	0.0003822	0.000357599
2058.02	8.12974	0.000656165	0.000640572	0.000624779	0.000608572	0.000591897	0.000574998	0.000557499	0.000538738	0.000518211	0.000495315	0.000470322	0.000444084	0.000416145
2066.44	8.13335	0.000701612	0.00068288	0.00066392	0.000644627	0.000625021	0.000605278	0.000584933	0.000563359	0.000539966	0.000514076	0.000486116	0.00045687	0.000426009
2074.86	8.13697	0.000458374	0.000445944	0.000433405	0.000420652	0.000407691	0.000394637	0.000381397	0.00036723	0.000351932	0.000334927	0.000316707	0.000297593	0.000277252
2083.28	8.14058	0.000244748	0.000237718	0.000230681	0.000223603	0.00021642	0.000209239	0.000201985	0.000194261	0.000186	0.000176745	0.000167029	0.000156679	0.000145855
2091.7	8.14419	0.000144231	0.000139772	0.000135348	0.000130918	0.000126441	0.000122011	0.000117518	0.000112771	0.000107708	0.000102171	9.62148e-05	9.00067e-05	8.34438e-05
2100.12	8.1478	5.15012e-05	5.00367e-05	4.86008e-05	4.71572e-05	4.56839e-05	4.42212e-05	4.27201e-05	4.11497e-05	3.95139e-05	3.75878e-05	3.57431e-05	3.35356e-05	3.12986e-05
2108.54	8.4804	2.14046e-05	2.07999e-05	2.02745e-05	1.97161e-05	1.91754e-05	1.8593e-05	1.80442e-05	1.74448e-05	1.68511e-05	1.61248e-05	1.52576e-05	1.44681e-05	1.35851e-05
2116.97	8.023	1.49571e-05	1.46776e-05	1.42796e-05	1.39018e-05	1.34989e-05	1.3046e-05	1.26224e-05	1.22379e-05	1.17049e-05	1.1175e-05	1.06162e-05	9.95514e-06	9.43565e-06
2125.41	8.476	2.29354e-06	2.20236e-06	2.13963e-06	2.08235e-06	2.04433e-06	1.97019e-06	1.93538e-06	1.85458e-06	1.77713e-06	1.66112e-06	1.56794e-06	1.4791e-06	1.30427e-06
2134.3	8.38695	1.31218e-06	1.29199e-06	1.25697e-06	1.2002e-06	1.16175e-06	1.12882e-06	1.07264e-06	1.00972e-06	9.53422e-07	9.40069e-07	8.48738e-07	7.83031e-07	7.90232e-07
2142.31	8.12115	2.0356e-06	2.02765e-06	1.95775e-06	1.90291e-06	1.83804e-06	1.80343e-06	1.7773e-06	1.71827e-06	1.71315e-06	1.6272e-06	1.65409e-06	1.53516e-06	1.4234e-06
2150.88	8.16947	1.62514e-05	1.59329e-05	1.5583e-05	1.52574e-05	1.48882e-05	1.45401e-05	1.4177e-05	1.38072e-05	1.3308e-05	1.28917e-05	1.22364e-05	1.17657e-05	1.09768e-05
2159.31	8.17308	1.05382e-05	1.03e-05	1.00816e-05	9.84997e-06	9.644e-06	9.40397e-06	9.16593e-06	8.9328e-06	8.62944e-06	8.35842e-06	7.92263e-06	7.53345e-06	7.25266e-06
2167.73	8.1767	7.22406e-06	7.04557e-06	6.86252e-06	6.68505e-06	6.5073e-06	6.34263e-06	6.14133e-06	5.90414e-06	5.74122e-06	5.45343e-06	5.22918e-06	4.96153e-06	4.56843e-06
2176.16	8.18031	1.93745e-06	1.86389e-06	1.81932e-06	1.7806e-06	1.72105e-06	1.6818e-06	1.62804e-06	1.59731e-06	1.56128e-06	1.40985e-06	1.32207e-06	1.35749e-06	1.24001e-06
2184.59	8.18392	5.33803e-07	5.17193e-07	5.01695e-07	4.93766e-07	4.23053e-07	5.01358e-07	4.92858e-07	4.18208e-07	4.21833e-07	4.22213e-07	4.38586e-07	2.94496e-07	3.08686e-07
2193.01	8.18753	5.18939e-07	5.06399e-07	4.79738e-07	4.7675e-07	4.98196e-07	4.60045e-07	4.32948e-07	4.16558e-07	4.18777e-07	3.38124e-07	3.98514e-07	3.7178e-07	2.24295e-07
2201.44	8.19114	8.73e-08	6.67613e-08	6.99542e-08	4.25512e-08	3.78773e-08	5.36786e-08	6.48234e-08	3.50979e-08	7.57182e-08	3.58802e-08	6.22165e-08	8.17739e-08	1.46524e-07
2209.87	8.19475	2.29718e-07	2.26963e-07	2.05867e-07	2.26596e-07	2.04593e-07	2.12523e-07	1.76889e-07	1.52935e-07	1.75567e-07	6.22202e-08	6.9086e-08	3.559e-08	7.90585e-08
2218.3	8.19837	1.29945e-07	1.45653e-07	1.1646e-07	1.42926e-07	1.37133e-07	1.98606e-07	1.06318e-07	9.21191e-08	9.87457e-08	1.86895e-07	1.33365e-07	1.73908e-08	2.29959e-08
2226.72	8.20198	1.57139e-07	1.66161e-07	1.33338e-07	1.36572e-07	1.4062e-07	1.86673e-07	1.11048e-07	9.17301e-08	6.90503e-08	8.07518e-08	7.49215e-08	1.72754e-07	1.13448e-07
2235.15	8.20559	5.34656e-08	4.89949e-08	1.97689e-08	6.94356e-08	2.8289e-08	9.42328e-09	7.31188e-09	5.08347e-08	5.62484e-08	0	2.93293e-08	6.27008e-08	-2.66266e-23
2243.58	8.2092	5.76288e-08	2.13467e-08	3.62798e-08	4.09579e-08	1.79145e-08	4.52622e-08	4.48628e-08	2.612e-08	3.72856e-08	3.29369e-08	1.04423e-08	0	5.12082e-08
2252.01	8.21281	1.758e-07	1.57686e-07	1.52089e-07	1.4965e-07	1.39823e-07	1.35709e-07	1.13753e-07	1.01561e-07	1.44487e-07	4.81909e-08	8.9571e-08	1.05615e-07	1.36418e-07
2260.43	8.21642	9.66799e-08	1.48551e-07	1.06555e-07	5.6693e-08	1.33052e-07	1.07585e-07	4.19323e-08	5.59055e-08	8.76433e-08	1.42615e-07	1.40071e-07	5.29146e-08	3.20651e-08
2268.86	8.22004	2.72068e-08	1.17089e-08	3.58786e-08	1.51221e-08	2.42037e-08	-1.74043e-08	0	2.784e-08	4.24353e-08	4.6372e-08	1.65136e-08	2.34245e-08	6.52471e-08
2277.29	8.22365	6.42656e-08	8.94496e-08	6.79596e-08	5.85016e-08	3.58986e-08	5.86689e-08	3.21755e-08	1.22282e-07	1.75155e-08	6.46519e-08	7.56434e-08	5.64346e-08	4.25794e-09
2285.71	8.22726	6.40562e-09	2.66216e-08	0	1.23444e-08	1.053e-08	9.25623e-09	2.07678e-08	0	0	5.12092e-08	0	5.328e-08	-3.23962e-08
2294.14	8.23087	2.92366e-09	4.32513e-08	8.22212e-09	8.6473e-25	1.62361e-08	0	0	0	2.53935e-08	0	0	0	0
2302.57	8.23448	0	1.87056e-08	8.36074e-09	0	0	-1.29902e-08	0	0	0	0	0	0	0
2311	8.23809	0	0	0	3.85833e-09	-1.2802e-08	2.43137e-08	0	0	0	0	-1.92328e-08	0	0
2319.42	8.24171	0	0	0	0	1.15688e-08	0	0	0	0	0	0	0	0
2327.85	8.24532	0	0	0	0	9.42695e-09	0	0	0	0	0	0	0	0
2336.28	8.24893	6.91671e-09	0	0	0	0	0	0	0	0	0	0	-3.05902e-08	-1.27745e-08
2344.71	8.25254	0	0	0	0	0	0	0	0	0	0	0	0	1.33267e-08
2353.13	8.25615	6.28063e-09	0	0	0	0	0	0	0	0	0	0	0	0
2361.56	8.25976	9.93224e-10	0	1.19469e-08	0	0	0	2.80476e-08	0	0	0	-5.60223e-08	0	9.91647e-09
2369.99	8.26338	0	2.41868e-08	0	0	0	0	0	0	0	-1.70549e-08	0	0	0
2378.41	8.26699	0	0	0	0	2.65788e-08	0	0	0	0	0	0	-6.05597e-08	3.58782e-09
2386.84	8.2706	0	0	1.99174e-08	5.54733e-09	0	0	1.89996e-08	0	0	0	0	0	1.96566e-08
2395.27	8.27421	-1.30149e-08	0	3.07473e-08	0	0	0	0	0	0	0	0	0	6.19269e-09
2403.7	8.27782	0	0	0	0	0	0	0	0	0	0	0	0	-1.32301e-08
2412.12	8.28143	-8.52886e-09	9.90565e-09	0	1.20039e-08	2.02237e-08	0	0	0	1.86758e-08	0	0	0	-3.03761e-09
2420.55	8.28505	0	1.83549e-08	0	0	0	1.38645e-08	0	0	0	0	0	0	-3.88581e-09
2428.98	8.28866	0	0	0	0	0	0	0	0	-5.68631e-08	0	0	0	-4.53007e-09
2437.41	8.29227	1.08779e-08	1.20924e-08	2.84708e-08	0	0	0	0	1.66181e-08	0	0	2.56952e-23	0	-1.19399e-08
2445.83	8.29588	0	0	0	0	0	0	0	0	0	0	0	0	0
2454.26	8.29949	0	0	0	0	0	0	0	1.52624e-08	0	3.88208e-08	0	0	-1.15961e-08
2462.69	8.3031	0	0	0	2.53852e-08	0	0	4.331e-08	0	0	0	0	2.05339e-23	2.03263e-08
2471.11	8.30672	1.31112e-08	7.0695e-08	8.66511e-08	4.74172e-08	7.8547e-08	3.73522e-08	4.89121e-08	3.01281e-08	4.38303e-08	1.05932e-07	7.59799e-09	3.65746e-08	9.15529e-24
2479.54	8.31033	3.38724e-07	3.64373e-07	3.39676e-07	3.23158e-07	3.02211e-07	3.38605e-07	2.61971e-07	3.18882e-07	2.24135e-07	2.04007e-07	2.25241e-07	2.30875e-07	1.85921e-07
2487.97	8.31394	3.43417e-06	3.35836e-06	3.30083e-06	3.12985e-06	3.0531e-06	2.94442e-06	2.76673e-06	2.83199e-06	2.64729e-06	2.45358e-06	2.39842e-06	2.10107e-06	1.94272e-06
2496.4	8.31755	1.38984e-06	1.26696e-06	1.29844e-06	1.22686e-06	1.18938e-06	1.03333e-06	1.10797e-06	1.09044e-06	1.01606e-06	9.06648e-07	8.40162e-07	8.44193e-07	7.47384e-07
2504.82	8.32116	9.28195e-07	8.72198e-07	8.58816e-07	8.47124e-07	8.67482e-07	7.65152e-07	7.79489e-07	6.37937e-07	8.29578e-07	7.17646e-07	7.23488e-07	5.98198e-07	5.57051e-07
2513.25	8.32477	1.07823e-06	1.11578e-06	1.07167e-06	1.08031e-06	9.43362e-07	1.14774e-06	9.36334e-07	1.12399e-06	6.99372e-07	1.02509e-06	8.08984e-07	7.49885e-07	6.98807e-07

## Sheet: k_EMIT
Wavelength	FWHM	k_Summer_L	k_Summer_M	k_Summer_H	k_Winter_L	k_Winter_M	k_Winter_H	k_1976_L	k_1976_M	k_1976_H
1006.83	8.529	0	0	0	0	0	0	0	0	0	0	0	0	0
1014.29	8.53	0	0	0	0	0	0	0	0	0	0	0	0	0
1021.76	8.531	0	0	0	0	0	0	0	0	0	0	0	0	0
1029.22	8.533	0	0	0	0	0	0	0	0	0	0	0	0	0
1036.68	8.534	4.11489e-07	3.9654e-07	3.84323e-07	3.67685e-07	3.6823e-07	3.67961e-07	3.50145e-07	3.37005e-07	3.17115e-07	3.06772e-07	3.22322e-07	2.86892e-07	2.75071e-07
1044.14	8.536	9.13068e-08	8.6516e-08	8.15247e-08	9.86834e-08	8.95843e-08	7.82201e-08	8.0628e-08	6.88083e-08	9.3093e-08	8.72524e-08	5.18645e-08	7.0528e-08	4.95947e-08
1051.6	8.537	1.20027e-06	1.15683e-06	1.15141e-06	1.11294e-06	1.06218e-06	1.0602e-06	1.00952e-06	9.77597e-07	9.55097e-07	9.08376e-07	8.90205e-07	8.34187e-07	8.01268e-07
1059.06	8.538	7.28453e-08	7.23196e-08	9.50824e-08	7.9615e-08	8.53442e-08	4.87877e-08	5.65623e-08	5.17885e-08	5.89075e-08	8.4552e-08	4.55647e-08	6.69245e-08	4.7899e-08
1066.52	8.54	2.33854e-07	2.15008e-07	2.11191e-07	2.02874e-07	1.92696e-07	1.86022e-07	2.02101e-07	1.63646e-07	1.59163e-07	1.75556e-07	1.59231e-07	1.4688e-07	1.55313e-07
1073.98	8.541	3.8624e-08	2.27143e-08	2.99496e-08	2.76753e-08	2.13582e-08	8.45982e-09	3.46748e-08	1.18244e-08	1.41259e-08	1.78017e-08	1.97573e-08	5.93131e-09	2.07189e-08
1081.44	8.543	-1.04901e-25	2.36963e-09	0	4.14644e-09	6.41771e-09	0	2.98113e-09	0	0	0	0	0	-6.66159e-09
1088.9	8.544	0	0	0	0	5.72405e-09	0	0	0	0	0	0	0	0
1096.36	8.545	0	3.9597e-09	0	0	8.69792e-09	0	-3.95203e-09	0	0	-5.92961e-09	0	0	0
1103.82	8.547	0	0	0	0	0	0	0	0	0	0	0	0	0
1111.28	8.548	0	3.03322e-09	0	0	5.32811e-09	0	3.08695e-09	0	0	0	0	0	0
1118.74	8.55	0	0	7.99131e-10	0	-6.654e-09	0	0	0	0	5.15276e-09	0	0	0
1126.2	8.551	0	0	0	0	0	0	0	0	0	0	0	0	0
1133.66	8.552	0	0	0	0	9.46921e-09	0	0	0	0	1.4529e-09	0	5.01136e-09	0
1141.11	8.554	0	0	0	0	0	0	0	0	0	0	0	0	0
1148.57	8.555	0	0	0	0	0	0	0	0	0	0	0	0	0
1156.03	8.557	0	0	0	0	0	0	0	0	0	0	0	0	0
1163.49	8.558	0	0	0	0	0	0	0	0	0	0	0	0	0
1170.95	8.559	0	0	0	0	0	0	0	0	0	0	0	0	0
1178.4	8.561	0	0	0	0	0	0	0	0	0	0	0	0	0
1185.86	8.562	0	0	0	0	0	0	0	0	0	0	0	0	0
1193.32	8.564	0	0	0	0	0	0	0	0	0	0	0	0	0
1200.78	8.565	1.1445e-05	1.11887e-05	1.0924e-05	1.06657e-05	1.04074e-05	1.01187e-05	9.85862e-06	9.58301e-06	9.30264e-06	8.98207e-06	8.66788e-06	8.35054e-06	8.02671e-06
1208.23	8.566	2.63878e-05	2.57738e-05	2.51236e-05	2.45244e-05	2.38474e-05	2.32102e-05	2.25767e-05	2.19338e-05	2.1231e-05	2.04546e-05	1.97968e-05	1.90079e-05	1.83499e-05
1215.69	8.568	1.01391e-05	9.87768e-06	9.58354e-06	9.3525e-06	9.05497e-06	8.75866e-06	8.53575e-06	8.31104e-06	7.95033e-06	7.62768e-06	7.40801e-06	7.04001e-06	6.81046e-06
1223.15	8.569	1.77484e-05	1.73197e-05	1.68778e-05	1.6432e-05	1.60148e-05	1.55881e-05	1.51224e-05	1.46853e-05	1.41965e-05	1.37624e-05	1.32017e-05	1.26803e-05	1.22502e-05
1230.6	8.571	1.94583e-06	1.87143e-06	1.79727e-06	1.74807e-06	1.68162e-06	1.63969e-06	1.53885e-06	1.48384e-06	1.43832e-06	1.35711e-06	1.29156e-06	1.28037e-06	1.21396e-06
1238.06	8.572	6.32226e-07	6.52921e-07	6.29451e-07	6.33051e-07	5.78592e-07	5.9198e-07	5.74728e-07	5.24299e-07	5.35366e-07	4.87176e-07	4.95657e-07	4.31e-07	3.63922e-07
1245.52	8.573	1.78775e-08	5.47761e-08	3.63904e-08	2.64178e-08	1.94437e-08	1.48007e-08	5.05716e-08	5.29563e-08	2.3836e-08	3.27334e-08	3.63372e-08	3.33076e-08	9.50661e-09
1252.97	8.575	1.87165e-07	1.91794e-07	1.752e-07	1.55069e-07	1.53036e-07	1.47571e-07	1.14371e-07	2.087e-07	1.74085e-07	1.63259e-07	1.26525e-07	1.03926e-07	1.8957e-07
1260.43	8.576	1.78883e-07	1.46627e-07	1.34966e-07	2.16006e-07	1.45478e-07	1.03698e-07	1.56058e-07	1.78821e-07	1.23113e-07	1.37242e-07	1.70963e-07	1.72907e-07	1.60101e-07
1267.88	8.578	1.20083e-07	1.18292e-07	1.3127e-07	1.34919e-07	1.14266e-07	1.32067e-07	9.59741e-08	1.17108e-07	6.19154e-08	7.16612e-08	9.06046e-08	1.23513e-07	1.89848e-08
1275.34	8.579	6.22226e-09	5.48957e-09	0	6.87449e-09	0	0	0	0	0	0	0	1.82267e-08	0
1282.79	8.58	2.83553e-08	4.08802e-08	3.58418e-08	3.75596e-08	1.70802e-08	3.99472e-08	2.69853e-08	2.18954e-08	1.93356e-08	0	0	0	0
1290.25	8.582	1.60308e-06	1.533e-06	1.518e-06	1.42817e-06	1.39878e-06	1.35999e-06	1.34719e-06	1.30432e-06	1.25324e-06	1.23536e-06	1.12389e-06	1.03295e-06	1.08091e-06
1297.71	8.583	8.95041e-07	8.9516e-07	8.56158e-07	7.98183e-07	7.82874e-07	7.46761e-07	7.41064e-07	7.6393e-07	7.15723e-07	6.41026e-07	6.10519e-07	6.08112e-07	5.88423e-07
1305.16	8.585	1.21927e-09	2.38424e-24	3.9554e-09	1.1891e-08	4.25484e-08	3.73056e-24	4.27713e-08	0	2.73391e-08	0	1.54387e-08	-1.04087e-08	0
1312.61	8.586	3.78116e-06	3.69242e-06	3.6065e-06	3.50788e-06	3.40892e-06	3.32375e-06	3.22785e-06	3.14194e-06	3.03553e-06	2.9745e-06	2.85288e-06	2.74358e-06	2.62275e-06
1320.07	8.587	4.41869e-06	4.28162e-06	4.17208e-06	4.03098e-06	3.92752e-06	3.83724e-06	3.73601e-06	3.56837e-06	3.43607e-06	3.35812e-06	3.15853e-06	3.21681e-06	2.88826e-06
1327.52	8.589	1.381e-07	1.29373e-07	9.61963e-08	1.15195e-07	1.30734e-07	1.43526e-07	1.30052e-07	9.91001e-08	6.16797e-08	8.87467e-08	7.30215e-08	1.07167e-07	5.4476e-08
1334.98	8.59	1.31048e-06	1.21339e-06	1.24809e-06	1.18021e-06	1.12423e-06	1.1414e-06	1.13508e-06	1.09686e-06	9.74397e-07	1.0153e-06	9.91372e-07	9.49557e-07	9.06398e-07
1342.43	8.592	2.37331e-06	2.29723e-06	2.226e-06	2.20964e-06	2.07166e-06	2.04283e-06	1.91472e-06	1.94374e-06	1.93753e-06	1.79867e-06	1.68676e-06	1.66388e-06	1.60505e-06
1349.88	8.593	2.43598e-07	3.17378e-07	2.86691e-07	2.35573e-07	2.35598e-07	1.92479e-07	2.63769e-07	1.43564e-07	2.00561e-07	1.61179e-07	1.94489e-07	1.37167e-07	1.33488e-07
1357.34	8.594	1.9066e-08	1.7768e-08	7.29168e-09	2.60187e-09	1.04658e-08	1.22507e-08	1.34173e-08	7.11295e-09	4.50148e-09	1.37865e-08	1.2599e-08	9.68861e-09	1.0479e-08
1364.79	8.596	2.64939e-08	1.78157e-08	1.91186e-08	2.7272e-08	2.14816e-08	3.92956e-08	3.26098e-08	1.45643e-08	1.87944e-08	2.713e-08	2.18671e-08	2.03604e-08	3.93764e-08
1372.24	8.597	1.51856e-07	1.5028e-07	1.56533e-07	1.28178e-07	1.9062e-07	1.63692e-07	1.99779e-07	1.44487e-07	1.54956e-07	1.65557e-07	1.51968e-07	1.42469e-07	1.47256e-07
1379.69	8.599	6.92565e-08	4.71311e-08	6.75884e-08	2.99995e-08	6.25203e-08	3.64818e-08	7.64102e-08	6.55356e-08	5.43419e-08	4.72041e-08	4.78851e-08	5.15738e-08	4.23677e-08
1387.14	8.6	4.0972e-09	6.73954e-09	0	3.01421e-09	0	1.56292e-09	1.51691e-08	2.85661e-09	8.55445e-09	8.04541e-09	0	1.90214e-08	5.81352e-09
1394.59	8.601	2.44672e-09	4.06725e-09	3.55688e-10	0	0	0	3.27231e-09	0	2.62509e-09	0	5.22344e-09	4.72895e-09	0
1402.04	8.603	2.36974e-08	-5.73906e-09	2.06265e-09	5.42494e-09	0	0	0	0	8.29602e-09	0	0	0	0
1409.49	8.604	3.27962e-09	0	0	0	0	0	0	0	0	0	0	0	0
1416.94	8.606	0	0	2.24764e-09	0	0	0	0	0	0	0	2.28836e-09	4.55203e-09	0
1424.39	8.607	1.08975e-08	5.63031e-08	4.62574e-09	1.03144e-08	1.03628e-08	4.86483e-08	6.65439e-09	3.40639e-08	4.55461e-08	1.2491e-08	9.33535e-09	1.97059e-08	2.32995e-08
1431.84	8.608	0.000178678	0.000177206	0.000175574	0.000173684	0.000171705	0.000169337	0.000166769	0.000164111	0.00016097	0.000157493	0.000153805	0.000149874	0.00014577
1439.29	8.61	0.000174635	0.000170875	0.000166938	0.00016276	0.000158552	0.000154235	0.000149758	0.000145186	0.000140388	0.000135281	0.000130104	0.000124894	0.000119665
1446.74	8.611	4.17343e-05	4.0479e-05	3.9302e-05	3.79747e-05	3.66411e-05	3.53781e-05	3.4064e-05	3.28035e-05	3.13606e-05	2.99507e-05	2.85297e-05	2.71076e-05	2.56974e-05
1454.19	8.613	2.40476e-06	2.32202e-06	2.29241e-06	2.24162e-06	2.04653e-06	2.05254e-06	1.9181e-06	1.78365e-06	1.78506e-06	1.68742e-06	1.60967e-06	1.53978e-06	1.45063e-06
1461.64	8.614	1.93301e-07	1.81574e-07	1.14345e-07	1.17398e-07	9.20686e-08	1.79488e-07	6.51329e-08	6.94347e-08	1.37235e-07	7.36619e-08	7.38589e-08	9.44906e-08	7.45848e-08
1469.08	8.615	4.38636e-06	4.32312e-06	4.24744e-06	4.08947e-06	4.02047e-06	3.93424e-06	3.83502e-06	3.69967e-06	3.59839e-06	3.49851e-06	3.35407e-06	3.22275e-06	3.09744e-06
1476.53	8.617	8.59952e-06	8.48757e-06	8.32894e-06	8.14283e-06	8.0817e-06	7.84677e-06	7.71115e-06	7.41353e-06	7.33073e-06	7.11651e-06	6.87241e-06	6.65544e-06	6.43908e-06
1483.98	8.618	2.34262e-06	2.25196e-06	2.11985e-06	2.15471e-06	2.10889e-06	1.99075e-06	1.90065e-06	1.80145e-06	1.79301e-06	1.6391e-06	1.68066e-06	1.55819e-06	1.48676e-06
1491.43	8.62	1.17794e-06	1.17763e-06	1.19405e-06	1.08298e-06	1.03313e-06	9.47611e-07	9.62139e-07	9.5126e-07	8.94349e-07	9.45272e-07	7.91248e-07	8.17597e-07	7.64921e-07
1498.87	8.621	2.30412e-06	2.29426e-06	2.19747e-06	2.13252e-06	2.08132e-06	2.08546e-06	2.00651e-06	1.95574e-06	1.84488e-06	1.73909e-06	1.73034e-06	1.66046e-06	1.57653e-06
1506.32	8.622	6.19211e-08	7.8558e-08	9.98926e-08	7.83072e-08	6.66761e-08	3.78946e-08	9.60135e-08	2.58106e-08	7.21101e-08	6.48918e-08	3.5089e-08	3.25121e-08	3.77242e-08
1513.76	8.624	1.15775e-24	8.74176e-09	0	0	0	2.08995e-08	0	1.42937e-08	-1.60446e-08	0	3.14538e-09	7.5886e-09	6.13575e-09
1521.21	8.625	4.21092e-07	4.59901e-07	3.70176e-07	4.56697e-07	3.50282e-07	4.12852e-07	3.43221e-07	3.28576e-07	2.58919e-07	3.03826e-07	2.78354e-07	2.51178e-07	2.45383e-07
1528.66	8.627	7.09394e-06	6.9077e-06	6.70535e-06	6.5345e-06	6.29232e-06	6.06306e-06	5.90854e-06	5.59067e-06	5.39546e-06	5.24259e-06	4.93628e-06	4.71088e-06	4.47329e-06
1536.1	8.628	3.12333e-05	3.05464e-05	2.97882e-05	2.90774e-05	2.83684e-05	2.75438e-05	2.68113e-05	2.59664e-05	2.51564e-05	2.43372e-05	2.33992e-05	2.24849e-05	2.15457e-05
1543.55	8.629	1.76241e-05	1.72249e-05	1.67837e-05	1.63171e-05	1.59031e-05	1.54456e-05	1.50118e-05	1.44624e-05	1.40639e-05	1.36155e-05	1.30167e-05	1.24943e-05	1.19526e-05
1550.99	8.631	3.35588e-07	3.65188e-07	2.86529e-07	2.90451e-07	3.29548e-07	2.90619e-07	3.70339e-07	3.17005e-07	2.02334e-07	1.63407e-07	2.18012e-07	1.96715e-07	1.89442e-07
1558.43	8.632	2.63277e-07	2.58232e-07	2.88259e-07	1.7389e-07	2.98991e-07	2.40751e-07	2.47266e-07	1.89468e-07	3.64527e-07	7.02139e-08	2.03167e-07	2.06585e-07	1.9631e-07
1565.88	8.634	1.96719e-05	1.90069e-05	1.84335e-05	1.77816e-05	1.71731e-05	1.64926e-05	1.59836e-05	1.54687e-05	1.46094e-05	1.39631e-05	1.33127e-05	1.26488e-05	1.19464e-05
1573.32	8.635	0.000168618	0.000164522	0.000160346	0.000156182	0.000151867	0.000147515	0.000143244	0.00013875	0.000134044	0.000128997	0.000123887	0.000118722	0.000113466
1580.76	8.636	0.000108222	0.000105574	0.000102905	0.000100126	9.73642e-05	9.46095e-05	9.18086e-05	8.87742e-05	8.58198e-05	8.25748e-05	7.92686e-05	7.59459e-05	7.25442e-05
1588.2	8.638	7.08739e-06	6.82695e-06	6.61203e-06	6.36239e-06	6.16966e-06	5.91634e-06	5.72218e-06	5.36358e-06	5.2612e-06	4.93665e-06	4.6877e-06	4.44207e-06	4.17565e-06
1595.65	8.639	1.60502e-05	1.55603e-05	1.50997e-05	1.46225e-05	1.40915e-05	1.3567e-05	1.31865e-05	1.27655e-05	1.218e-05	1.16303e-05	1.10775e-05	1.05362e-05	9.98217e-06
1603.09	8.641	0.000156291	0.000152577	0.000148878	0.000145001	0.000141222	0.000137345	0.000133347	0.0001292	0.000124919	0.000120347	0.000115617	0.000110833	0.000105924
1610.53	8.642	0.000123274	0.000120236	0.000117129	0.000114013	0.000110792	0.000107556	0.00010437	0.000101181	9.75981e-05	9.38653e-05	9.00348e-05	8.61496e-05	8.22021e-05
1617.97	8.643	2.28519e-05	2.20877e-05	2.13503e-05	2.06387e-05	1.98669e-05	1.91055e-05	1.84022e-05	1.76431e-05	1.69351e-05	1.60561e-05	1.52428e-05	1.44139e-05	1.35877e-05
1625.41	8.645	2.8555e-06	2.78083e-06	2.64326e-06	2.59198e-06	2.49165e-06	2.37597e-06	2.33791e-06	2.23226e-06	2.0837e-06	1.97685e-06	1.86818e-06	1.76893e-06	1.66173e-06
1632.85	8.646	3.42995e-06	3.29657e-06	3.2716e-06	3.13771e-06	3.09993e-06	2.96657e-06	2.96026e-06	2.95159e-06	2.74386e-06	2.61888e-06	2.51356e-06	2.41648e-06	2.28311e-06
1640.29	8.648	2.47806e-05	2.42153e-05	2.35918e-05	2.30002e-05	2.23949e-05	2.17377e-05	2.11421e-05	2.05804e-05	1.97933e-05	1.90237e-05	1.82707e-05	1.74941e-05	1.66647e-05
1647.73	8.649	2.44344e-05	2.39213e-05	2.32888e-05	2.27469e-05	2.23025e-05	2.16013e-05	2.10335e-05	2.04507e-05	1.98019e-05	1.90918e-05	1.83644e-05	1.76045e-05	1.68465e-05
1655.17	8.65	7.76491e-06	7.52267e-06	7.25826e-06	7.03736e-06	6.77171e-06	6.51533e-06	6.46206e-06	6.06283e-06	5.90162e-06	5.63334e-06	5.37043e-06	5.10457e-06	4.80849e-06
1662.61	8.652	2.03653e-06	1.97091e-06	1.87356e-06	1.7339e-06	1.81508e-06	1.72643e-06	1.55074e-06	1.60509e-06	1.49271e-06	1.41014e-06	1.37282e-06	1.28305e-06	1.24128e-06
1670.05	8.653	8.85097e-07	8.31309e-07	8.14763e-07	7.22177e-07	7.46418e-07	7.51444e-07	7.63629e-07	7.00097e-07	6.65091e-07	6.33599e-07	6.09088e-07	5.51492e-07	5.47308e-07
1677.48	8.655	2.82567e-07	2.0761e-07	2.32062e-07	2.37068e-07	1.88191e-07	3.19051e-07	3.52285e-07	1.81732e-07	1.9029e-07	1.74377e-07	1.74256e-07	1.62244e-07	1.70257e-07
1684.92	8.656	5.93432e-08	3.91587e-08	1.65576e-07	1.00094e-07	9.43426e-08	1.53492e-07	1.77818e-07	1.0961e-07	7.42863e-08	7.44118e-08	7.88647e-08	1.08662e-07	6.78261e-08
1692.36	8.657	2.27523e-08	0	3.14599e-08	4.03568e-08	0	2.01466e-08	0	1.51895e-08	2.52351e-08	2.02229e-08	2.3243e-08	9.19605e-09	6.37908e-09
1699.8	8.659	8.45225e-09	6.85792e-09	0	3.02886e-08	0	0	0	6.00935e-09	8.31375e-09	1.22885e-08	5.27884e-09	1.87034e-08	-1.45327e-08
1707.23	8.66	0	4.29723e-08	8.09661e-08	0	8.97467e-24	0	4.54748e-09	6.20241e-09	1.12046e-08	2.07548e-08	1.60136e-09	-3.45765e-09	-8.69007e-10
1714.67	8.662	0	2.06635e-08	1.84887e-08	0	2.79292e-08	0	3.94468e-09	5.34772e-09	7.91268e-09	2.41516e-08	2.00736e-08	-1.37224e-08	-8.31599e-09
1722.1	8.663	-1.45482e-24	1.4125e-08	0	0	1.81284e-08	0	5.81881e-09	4.40582e-09	2.51113e-08	0	-4.27704e-10	1.47107e-09	4.19007e-09
1729.54	8.664	0	3.84079e-09	0	8.64878e-09	4.34378e-09	1.02e-08	-2.10112e-09	7.34661e-09	-6.67866e-10	-1.30002e-08	6.87183e-09	-1.3013e-09	6.03909e-09
1736.97	8.666	0	3.15071e-08	0	0	3.75061e-08	0	3.89899e-09	9.82665e-09	-5.51819e-09	-4.06751e-09	0	0	0
1744.41	8.667	0	0	0	0	-1.30946e-08	0	-5.3845e-09	2.00051e-09	1.31123e-09	8.68764e-09	0	3.15512e-24	0
1751.84	8.669	9.97635e-08	5.20651e-08	6.4511e-08	4.06898e-08	8.43777e-08	1.94274e-07	8.68646e-08	7.41534e-08	7.85912e-08	6.02307e-08	6.2709e-08	4.43582e-08	5.6639e-08
1759.27	8.67	1.21819e-07	1.7481e-07	1.36905e-07	1.01286e-07	5.61095e-08	1.61023e-07	9.46239e-08	1.02921e-07	9.74959e-08	1.0604e-07	9.73051e-08	7.46282e-08	7.0279e-08
1766.71	8.671	5.0736e-08	4.55639e-08	1.29771e-07	1.82009e-07	4.80797e-08	7.79774e-08	6.4041e-08	4.10021e-08	6.90238e-08	4.1353e-08	5.97649e-08	3.22476e-08	1.36821e-08
1774.14	8.673	2.81845e-08	0	9.78591e-09	3.08954e-08	3.05947e-09	7.52878e-09	9.24676e-09	1.17449e-08	1.44071e-08	8.81941e-09	2.52927e-08	3.56921e-08	2.30711e-08
1781.57	8.674	0	8.34045e-24	0	5.30838e-09	5.89976e-09	1.11378e-08	7.18407e-09	9.14784e-09	1.92967e-08	1.63514e-08	6.09537e-09	3.50701e-08	0
1789.01	8.676	1.89481e-07	7.02443e-08	1.18649e-07	7.49074e-08	2.74494e-08	1.82451e-07	1.04424e-07	8.83504e-08	9.38953e-08	1.07994e-07	1.0297e-07	1.30535e-07	7.57948e-08
1796.44	8.677	1.06046e-07	5.97249e-08	1.2632e-07	2.96175e-08	4.56059e-08	4.54299e-08	3.16071e-08	6.01447e-08	5.25922e-08	3.31888e-08	6.98449e-08	1.20987e-08	4.52477e-08
1803.87	8.678	7.92495e-09	1.28193e-08	8.24297e-09	1.12947e-08	3.48981e-08	9.49321e-09	3.4533e-08	1.6396e-08	1.46106e-08	4.40636e-08	2.37164e-08	1.71845e-08	0
1811.3	8.68	7.87648e-10	0	0	0	6.98646e-09	1.02184e-08	0	2.07069e-08	0	0	9.12874e-09	0	1.87177e-08
1818.73	8.681	0	0	5.89374e-09	0	0	0	0	0	1.88063e-08	0	0	0	0
1826.16	8.683	0	0	0	0	0	0	0	0	0	0	0	0	0
1833.59	8.684	0	0	0	0	0	0	0	0	0	0	0	0	0
1841.02	8.685	0	0	0	0	0	0	0	0	0	0	0	0	0
1848.45	8.687	0	0	0	0	3.16867e-09	0	0	0	0	0	0	0	0
1855.88	8.688	0	0	0	0	0	0	0	0	0	3.81964e-08	0	0	0
1863.31	8.69	2.34086e-08	0	3.13808e-08	0	4.19591e-08	0	3.46813e-08	5.50825e-08	0	2.61354e-08	0	0	0
1870.73	8.691	1.2416e-06	1.20183e-06	1.24817e-06	1.22093e-06	1.21334e-06	1.27497e-06	1.32045e-06	1.27345e-06	1.27065e-06	1.27221e-06	1.18745e-06	1.20935e-06	1.22173e-06
1878.16	8.692	3.12218e-05	3.08958e-05	3.062e-05	3.02803e-05	2.98934e-05	2.94166e-05	2.88633e-05	2.82355e-05	2.751e-05	2.67738e-05	2.58408e-05	2.49272e-05	2.38794e-05
1885.59	8.694	2.54049e-05	2.52167e-05	2.49269e-05	2.47296e-05	2.44357e-05	2.40665e-05	2.36428e-05	2.32072e-05	2.26715e-05	2.21258e-05	2.14565e-05	2.07178e-05	1.99915e-05
1893.01	8.695	3.47975e-06	3.45127e-06	3.40737e-06	3.36438e-06	3.32065e-06	3.25344e-06	3.29591e-06	3.18767e-06	3.05967e-06	3.01966e-06	2.94287e-06	2.86576e-06	2.70351e-06
1900.44	8.697	6.96135e-07	7.42316e-07	6.7122e-07	6.71322e-07	5.94879e-07	5.27653e-07	6.62728e-07	4.59778e-07	5.60374e-07	6.23696e-07	5.5235e-07	5.13134e-07	5.74895e-07
1907.86	8.698	4.5002e-07	4.72172e-07	4.6204e-07	4.80068e-07	4.24521e-07	5.15162e-07	4.33233e-07	4.2935e-07	3.66571e-07	4.08351e-07	3.95085e-07	4.27707e-07	2.97352e-07
1915.29	8.699	2.57451e-07	2.63855e-07	2.5546e-07	2.26749e-07	2.42232e-07	2.42735e-07	2.602e-07	2.46602e-07	1.72271e-07	2.50674e-07	1.79895e-07	1.71115e-07	1.29118e-07
1922.71	8.701	3.07312e-07	2.76327e-07	3.14536e-07	2.64789e-07	2.86379e-07	2.63565e-07	2.65225e-07	2.27838e-07	1.92222e-07	2.20892e-07	1.85185e-07	1.31581e-07	1.44002e-07
1930.14	8.702	3.3878e-07	2.94169e-07	2.76649e-07	2.81573e-07	2.34717e-07	2.38741e-07	2.7035e-07	2.58592e-07	2.87103e-07	2.14739e-07	2.26457e-07	1.73286e-07	2.92304e-07
1937.56	8.704	1.34504e-05	1.30805e-05	1.2727e-05	1.23285e-05	1.19435e-05	1.14674e-05	1.1011e-05	1.05287e-05	9.92072e-06	9.3698e-06	8.72652e-06	8.04584e-06	7.37462e-06
1944.98	8.705	0.000267328	0.000260388	0.000253188	0.000245644	0.000237816	0.000229791	0.000221402	0.000212432	0.000202847	0.000192399	0.000181272	0.000169777	0.00015809
1952.41	8.706	0.00082756	0.000807814	0.000787297	0.00076589	0.000743571	0.000720541	0.00069647	0.000670525	0.000642674	0.000612118	0.000579216	0.00054531	0.000510407
1959.83	8.708	0.000846327	0.000828185	0.000809303	0.00078957	0.000768789	0.000747129	0.000724337	0.000699725	0.000672911	0.000643161	0.000610949	0.000577022	0.000542487
1967.25	8.709	0.000750808	0.000731294	0.00071133	0.00069088	0.000669886	0.000648522	0.000626523	0.000603084	0.000577875	0.000550187	0.000520549	0.000489725	0.000458037
1974.67	8.711	0.000232734	0.000226877	0.000220979	0.000214894	0.000208665	0.000202349	0.000195919	0.000189044	0.000181633	0.000173444	0.000164663	0.000155527	0.000146012
1982.09	8.712	5.35615e-05	5.20473e-05	5.05888e-05	4.90473e-05	4.752e-05	4.59496e-05	4.4348e-05	4.26878e-05	4.08785e-05	3.88501e-05	3.67492e-05	3.44763e-05	3.21535e-05
1989.52	8.714	3.4473e-05	3.34415e-05	3.25404e-05	3.15789e-05	3.0629e-05	2.96581e-05	2.86704e-05	2.76052e-05	2.64779e-05	2.52579e-05	2.3931e-05	2.26036e-05	2.11788e-05
1996.94	8.715	0.000478669	0.000469288	0.000459572	0.000449519	0.000438974	0.000428064	0.000416573	0.000404113	0.000390433	0.000375055	0.000358	0.000339969	0.000320788
2004.35	8.716	0.00239427	0.00232533	0.00225448	0.00218128	0.00210536	0.00202661	0.00194434	0.00185728	0.00176413	0.00166367	0.00155588	0.00144581	0.00133748
2011.77	8.718	0.00198797	0.00193192	0.00187459	0.00181563	0.00175495	0.00169245	0.00162752	0.00155855	0.00148439	0.00140364	0.00131689	0.0012275	0.00113766
2019.19	8.719	0.00125188	0.00121725	0.00118195	0.00114586	0.00110873	0.00107093	0.0010319	0.000990191	0.000945398	0.000896327	0.000843654	0.000788928	0.000732835
2026.61	8.721	0.000443788	0.000430081	0.000416353	0.000402524	0.000388514	0.000374552	0.000360356	0.000345421	0.000329473	0.00031189	0.000293417	0.00027429	0.000254319
2034.03	8.722	0.000225639	0.000219382	0.000213173	0.000206905	0.000200541	0.000194213	0.000187736	0.00018088	0.000173479	0.000165331	0.000156539	0.000147499	0.00013784
2041.45	8.723	0.000251979	0.000246247	0.000240394	0.00023442	0.000228292	0.000222125	0.000215773	0.000209016	0.000201641	0.000193338	0.000184384	0.000174887	0.000164786
2048.86	8.725	0.000508708	0.000496088	0.000483294	0.000470282	0.000456938	0.000443473	0.000429587	0.000414821	0.000398706	0.00038081	0.000361376	0.000340975	0.000319347
2056.28	8.726	0.000779499	0.000760339	0.000740915	0.000721032	0.000700579	0.000679837	0.000658406	0.000635485	0.000610428	0.000582579	0.000552248	0.00052053	0.000486875
2063.7	8.727	0.000619846	0.000604659	0.000589266	0.000573499	0.000557421	0.000541128	0.00052427	0.00050631	0.000486675	0.00046486	0.000441154	0.000416106	0.000389657
2071.11	8.729	0.000547027	0.000532025	0.000516873	0.000501452	0.000485814	0.000470096	0.000454069	0.000436958	0.000418502	0.000398059	0.000376137	0.000353185	0.000328794
2078.53	8.73	0.000304461	0.000296242	0.000288007	0.000279665	0.000271154	0.000262605	0.000253924	0.000244621	0.000234634	0.00022343	0.00021152	0.000198917	0.000185562
2085.94	8.732	0.000237516	0.000230584	0.000223629	0.000216629	0.000209543	0.000202452	0.000195303	0.000187735	0.000179609	0.000170572	0.000160983	0.000150871	0.000140233
2093.36	8.733	0.00011473	0.000111174	0.000107634	0.000104092	0.00010051	9.70065e-05	9.34446e-05	8.96524e-05	8.56265e-05	8.12312e-05	7.65507e-05	7.16052e-05	6.63827e-05
2100.77	8.734	4.67475e-05	4.54406e-05	4.41514e-05	4.28554e-05	4.15456e-05	4.02301e-05	3.88728e-05	3.74692e-05	3.60061e-05	3.42712e-05	3.26207e-05	3.06047e-05	2.86247e-05
2108.18	8.736	2.14299e-05	2.08254e-05	2.02992e-05	1.97401e-05	1.91989e-05	1.86161e-05	1.80667e-05	1.74665e-05	1.68717e-05	1.61445e-05	1.52769e-05	1.44857e-05	1.36028e-05
2115.59	8.737	1.79749e-05	1.76024e-05	1.71576e-05	1.67198e-05	1.62509e-05	1.57394e-05	1.52497e-05	1.47771e-05	1.41695e-05	1.35679e-05	1.29036e-05	1.21297e-05	1.14916e-05
2123.01	8.739	3.40137e-06	3.3642e-06	3.25838e-06	3.16394e-06	3.07071e-06	2.93836e-06	2.8696e-06	2.75289e-06	2.63898e-06	2.48742e-06	2.34934e-06	2.1863e-06	2.03094e-06
2130.42	8.74	2.0063e-06	1.83057e-06	1.76591e-06	1.69984e-06	1.68095e-06	1.60355e-06	1.56177e-06	1.51016e-06	1.41889e-06	1.35698e-06	1.22522e-06	1.15357e-06	1.08734e-06
2137.83	8.741	1.38056e-06	1.36958e-06	1.35131e-06	1.30399e-06	1.2495e-06	1.2292e-06	1.16823e-06	1.10678e-06	1.05591e-06	1.02555e-06	9.79467e-07	8.7109e-07	8.24884e-07
2145.24	8.743	7.31557e-06	7.19006e-06	6.99554e-06	6.82259e-06	6.63701e-06	6.46977e-06	6.3101e-06	6.13761e-06	5.95328e-06	5.6719e-06	5.47965e-06	5.22659e-06	4.86897e-06
2152.65	8.744	1.25727e-05	1.2324e-05	1.20683e-05	1.18268e-05	1.15669e-05	1.13176e-05	1.10525e-05	1.07767e-05	1.0405e-05	1.01053e-05	9.57242e-06	9.21282e-06	8.66108e-06
2160.06	8.746	1.06968e-05	1.04524e-05	1.02332e-05	9.99518e-06	9.78651e-06	9.53656e-06	9.29262e-06	9.04758e-06	8.75082e-06	8.45837e-06	8.03896e-06	7.6174e-06	7.30196e-06
2167.47	8.747	7.58144e-06	7.39224e-06	7.20945e-06	7.02549e-06	6.84425e-06	6.66359e-06	6.46101e-06	6.20952e-06	6.04777e-06	5.7426e-06	5.51973e-06	5.21603e-06	4.81504e-06
2174.88	8.748	2.65193e-06	2.56842e-06	2.50333e-06	2.44437e-06	2.37026e-06	2.32809e-06	2.23314e-06	2.18835e-06	2.12246e-06	1.95276e-06	1.89201e-06	1.83649e-06	1.73497e-06
2182.28	8.75	5.37492e-07	5.18269e-07	5.13533e-07	5.01742e-07	4.44463e-07	4.8334e-07	4.84995e-07	4.12103e-07	4.50588e-07	4.1905e-07	3.93673e-07	3.52827e-07	2.97684e-07
2189.69	8.751	7.41563e-07	7.18754e-07	6.84926e-07	6.85415e-07	6.39981e-07	6.5945e-07	6.55915e-07	6.06821e-07	5.8545e-07	5.20915e-07	5.78767e-07	5.17893e-07	3.20153e-07
2197.1	8.753	2.22793e-07	2.30841e-07	1.95537e-07	2.06524e-07	2.15942e-07	2.06294e-07	1.83274e-07	1.68392e-07	1.7492e-07	1.77293e-07	1.92336e-07	1.8283e-07	1.48283e-07
2204.5	8.754	6.7349e-08	4.91629e-08	5.70103e-08	3.02331e-08	4.29008e-08	4.42146e-08	6.0902e-08	1.70261e-08	3.03555e-08	0	5.36651e-08	5.68344e-24	4.60238e-08
2211.91	8.755	2.76835e-07	2.67254e-07	2.44115e-07	2.71399e-07	2.49323e-07	2.63725e-07	2.13134e-07	1.86432e-07	2.28663e-07	1.22904e-07	8.42166e-08	4.26904e-08	1.06678e-07
2219.31	8.757	1.31791e-07	1.40953e-07	1.16819e-07	1.44191e-07	1.26439e-07	2.0086e-07	9.62196e-08	1.00862e-07	7.9715e-08	1.59635e-07	1.38921e-07	1.92541e-08	2.43782e-08
2226.72	8.758	1.57457e-07	1.6596e-07	1.33824e-07	1.37141e-07	1.4044e-07	1.86926e-07	1.11688e-07	9.33537e-08	6.91639e-08	8.02618e-08	7.60819e-08	1.7215e-07	1.14876e-07
2234.12	8.76	7.20894e-08	6.04343e-08	2.20356e-08	7.51678e-08	3.79295e-08	2.05895e-08	1.59075e-08	7.93106e-08	6.77181e-08	8.84706e-09	3.11179e-08	5.85144e-08	-2.74694e-23
2241.53	8.761	3.6374e-08	2.82737e-08	2.88061e-08	2.00283e-08	2.25993e-08	4.46917e-08	3.77618e-08	2.52761e-08	1.56624e-08	1.332e-08	-2.27608e-08	0	5.10041e-08
2248.93	8.763	1.19749e-07	8.54329e-08	1.03288e-07	1.14785e-07	5.17722e-08	6.50829e-08	7.15311e-08	7.05549e-08	6.99149e-08	3.18508e-08	8.55272e-08	4.38777e-08	8.65666e-08
2256.33	8.764	1.67609e-07	1.75155e-07	1.36559e-07	1.34205e-07	1.63711e-07	1.79713e-07	1.17503e-07	6.03326e-08	1.989e-07	1.0576e-07	1.82949e-07	8.75604e-08	8.45696e-08
2263.73	8.765	6.39402e-08	8.54881e-08	7.25391e-08	1.51652e-08	9.05407e-08	3.92072e-08	3.06595e-08	1.98146e-08	1.81333e-08	1.30039e-07	2.71193e-08	4.89412e-08	3.85464e-08
2271.14	8.767	4.28758e-08	2.20176e-08	5.82643e-08	2.70416e-08	6.10129e-08	-1.46781e-08	0	5.18773e-08	3.31015e-08	6.56542e-08	5.84811e-08	0	1.05608e-07
2278.54	8.768	4.7437e-08	9.67139e-08	4.95434e-08	6.03366e-08	2.99085e-08	5.14314e-08	2.73709e-08	9.10667e-08	1.37079e-08	3.46144e-08	6.72833e-08	4.42029e-08	-1.51822e-09
2285.94	8.77	5.83312e-09	3.09461e-08	0	1.16037e-08	9.58435e-09	8.69856e-09	1.92805e-08	0	0	4.67615e-08	0	4.94165e-08	-2.95608e-08
2293.34	8.771	3.24056e-09	4.07597e-08	7.75406e-09	8.18844e-24	1.61925e-08	0	0	0	2.24363e-08	0	0	0	0
2300.74	8.772	6.14717e-25	2.2159e-08	7.31312e-09	0	0	-1.14296e-08	0	0	0	0	0	0	0
2308.14	8.774	0	8.78812e-09	3.48379e-09	2.51745e-08	1.71458e-09	0	0	0	0	0	0	0	0
2315.53	8.775	0	0	0	-2.65216e-24	-2.16324e-08	2.12769e-08	0	0	0	0	-2.82163e-08	0	0
2322.93	8.777	0	0	0	0	9.57036e-09	0	0	0	0	0	0	0	0
2330.33	8.778	0	0	0	0	1.47734e-08	0	0	0	0	0	0	-2.45683e-08	0
2337.73	8.779	6.73581e-09	0	0	0	0	0	0	0	0	0	0	-2.24594e-08	-1.07599e-08
2345.12	8.781	0	0	0	0	0	0	0	0	0	0	0	0	1.32371e-08
2352.52	8.782	6.09867e-09	0	0	0	0	0	0	0	0	0	0	0	0
2359.91	8.783	0	0	0	0	0	0	2.70075e-08	0	0	0	-7.28458e-08	0	8.30776e-09
2367.31	8.785	1.88533e-09	1.75485e-08	1.38659e-08	0	0	0	0	0	0	-1.13149e-08	0	0	0
2374.7	8.786	0	0	0	0	2.70299e-08	0	0	0	0	0	0	-1.21585e-07	0
2382.09	8.788	0	0	0	4.4266e-09	0	0	0	0	0	0	0	0	5.73771e-09
2389.49	8.789	-8.25227e-09	0	2.62765e-08	0	0	0	2.21356e-08	0	0	0	0	0	1.49651e-08
2396.88	8.79	-9.23057e-09	0	3.02475e-08	0	0	0	0	0	0	0	0	0	7.306e-09
2404.27	8.792	0	0	0	0	0	0	0	0	0	0	0	0	-1.20603e-08
2411.66	8.793	-8.40771e-09	9.04151e-09	0	1.18528e-08	2.13718e-08	0	0	0	1.68105e-08	0	0	0	-2.94728e-09
2419.05	8.795	0	1.83356e-08	0	0	0	9.73018e-09	0	0	0	0	0	0	-5.75658e-09
2426.44	8.796	0	0	0	0	0	9.91979e-09	0	0	-4.63915e-08	0	0	0	-3.32226e-09
2433.83	8.797	0	0	0	0	0	0	0	0	0	0	0	0	-2.69033e-09
2441.22	8.799	5.89813e-09	6.6079e-09	2.28035e-08	0	0	0	0	2.05063e-08	0	0	3.46692e-23	0	-3.95448e-09
2448.61	8.8	0	0	0	0	0	0	9.84417e-24	0	0	7.13147e-09	0	0	0
2455.99	8.802	0	0	0	0	0	0	0	1.6816e-08	0	2.51616e-08	0	1.63581e-23	-1.63013e-08
2463.38	8.803	0	0	0	1.97554e-08	2.06808e-08	2.12465e-08	3.36333e-08	0	0	0	0	1.03788e-23	2.82607e-08
2470.77	8.804	1.14748e-08	6.23349e-08	7.67419e-08	4.1338e-08	7.08682e-08	3.40007e-08	4.39103e-08	2.65447e-08	4.07618e-08	9.35686e-08	6.85603e-09	3.23019e-08	5.58469e-24
2478.15	8.806	1.36308e-07	1.81567e-07	1.71209e-07	1.34552e-07	1.26737e-07	1.6746e-07	1.15958e-07	1.61878e-07	1.48262e-07	7.80886e-08	1.11621e-07	1.1241e-07	6.72204e-08
2485.54	8.807	3.49939e-06	3.44154e-06	3.31414e-06	3.24481e-06	3.11745e-06	2.98975e-06	2.78379e-06	2.80697e-06	2.59196e-06	2.46289e-06	2.3535e-06	2.10239e-06	1.94874e-06
2492.92	8.809	1.53562e-06	1.44382e-06	1.42544e-06	1.31661e-06	1.27818e-06	1.16407e-06	1.18194e-06	1.27063e-06	1.12037e-06	1.01019e-06	9.87793e-07	9.04982e-07	8.16727e-07

## Sheet: k_PRISMA
Wavelength	FWHM	k_Summer_L	k_Summer_M	k_Summer_H	k_Winter_L	k_Winter_M	k_Winter_H	k_1976_L	k_1976_M	k_1976_H
943.093	11.1634	-5.62598e-27	0	0	0	4.27475e-10	0	0	6.34591e-09	0	0	0	2.75819e-09	3.95858e-09
951.123	11.2245	2.69153e-26	0	0	0	0	0	0	1.31143e-09	0	0	0	1.84905e-09	4.41342e-09
959.679	12.4243	0	0	0	0	0	0	0	0	0	0	0	0	0
969.494	12.4752	0	0	0	0	0	0	0	0	0	0	0	0	0
978.688	12.2031	0	0	0	0	0	0	0	0	0	0	0	0	0
988.394	12.4208	0	0	0	0	0	0	0	0	0	0	0	0	0
998.492	13.0605	0	0	0	0	0	0	0	0	0	0	0	0	0
1008.29	12.7977	0	0	0	0	0	0	0	0	0	0	0	0	0
1018.18	13.3457	0	0	0	0	0	0	0	0	0	0	0	0	0
1028.97	13.3271	0	0	0	0	0	0	0	0	0	0	0	0	0
1038.22	13.3406	3.25601e-07	3.14752e-07	3.0272e-07	2.94104e-07	2.93718e-07	2.89806e-07	2.80257e-07	2.63501e-07	2.60949e-07	2.50349e-07	2.46702e-07	2.31178e-07	2.11739e-07
1047.9	13.6246	7.05438e-07	6.81532e-07	6.71967e-07	6.60248e-07	6.23663e-07	6.16299e-07	5.96005e-07	5.72145e-07	5.63571e-07	5.39014e-07	5.13838e-07	4.88284e-07	4.67928e-07
1057.87	13.8052	3.50333e-07	3.39479e-07	3.53524e-07	3.30498e-07	3.18648e-07	3.03835e-07	2.89801e-07	2.76962e-07	2.73929e-07	2.86276e-07	2.51746e-07	2.54174e-07	2.37798e-07
1068.11	14.0138	1.58074e-07	1.42972e-07	1.41739e-07	1.32179e-07	1.25343e-07	1.19977e-07	1.3963e-07	1.04656e-07	1.03187e-07	1.2088e-07	1.07064e-07	9.58363e-08	1.05853e-07
1078.56	14.1443	1.65948e-08	1.30082e-08	1.17578e-08	1.45034e-08	1.40357e-08	2.4331e-09	1.19483e-08	5.93908e-09	6.63755e-09	3.75148e-09	1.09875e-08	1.00437e-24	4.4505e-09
1089.09	14.237	0	1.80731e-09	0	0	4.59125e-09	0	0	0	0	-2.18891e-09	0	0	-4.06278e-09
1099.62	14.2462	0	1.92668e-09	0	0	4.81455e-09	0	-3.38797e-09	0	0	-2.89341e-09	0	0	0
1110.27	14.509	0	1.85609e-09	0	0	1.08743e-09	0	1.87022e-09	0	0	0	0	0	0
1121.01	14.2789	0	0	4.49833e-10	0	-7.33976e-10	0	0	0	0	2.87263e-09	0	0	0
1131.68	14.4797	0	0	0	0	6.14216e-09	0	0	0	0	8.55268e-10	0	4.0328e-09	0
1142.36	14.3065	0	0	0	0	0	0	0	0	0	0	0	0	0
1153	14.5513	0	0	0	0	0	0	0	0	0	0	0	0	0
1164.03	14.8343	0	0	0	0	0	0	0	0	0	0	0	0	0
1175.07	14.4813	0	0	0	0	0	0	0	0	0	0	0	0	0
1185.9	14.5792	0	0	0	0	0	0	0	0	0	0	0	0	0
1196.7	14.5482	2.16061e-06	2.11603e-06	2.07198e-06	2.03027e-06	1.98829e-06	1.93745e-06	1.89274e-06	1.84117e-06	1.79238e-06	1.73273e-06	1.67365e-06	1.61378e-06	1.54928e-06
1207.6	14.6949	2.10547e-05	2.05676e-05	2.0055e-05	1.95832e-05	1.90591e-05	1.85435e-05	1.80534e-05	1.75362e-05	1.69908e-05	1.63754e-05	1.58396e-05	1.52175e-05	1.46627e-05
1218.23	14.5848	1.44822e-05	1.41234e-05	1.37351e-05	1.33858e-05	1.3004e-05	1.26221e-05	1.22667e-05	1.19184e-05	1.14795e-05	1.1078e-05	1.06852e-05	1.02228e-05	9.86986e-06
1229.48	15.038	4.90932e-06	4.76937e-06	4.63314e-06	4.5026e-06	4.3724e-06	4.25604e-06	4.08978e-06	3.96631e-06	3.83604e-06	3.68315e-06	3.51462e-06	3.39522e-06	3.2511e-06
1240.57	14.5454	3.9758e-07	4.30057e-07	4.01309e-07	3.99279e-07	3.67626e-07	3.69402e-07	3.70339e-07	3.45195e-07	3.40319e-07	3.09044e-07	3.1624e-07	2.91478e-07	2.30684e-07
1251.35	14.976	1.27379e-07	1.23981e-07	1.26735e-07	1.08546e-07	1.0217e-07	1.00165e-07	8.55844e-08	1.41367e-07	1.16107e-07	1.07427e-07	8.30959e-08	6.95097e-08	1.30595e-07
1262.86	15.0231	1.73241e-07	1.51592e-07	1.50484e-07	1.99174e-07	1.51016e-07	1.27603e-07	1.44818e-07	1.71527e-07	1.06547e-07	1.32277e-07	1.46241e-07	1.69041e-07	1.03077e-07
1273.81	14.6921	1.44449e-08	1.23788e-08	1.10061e-08	1.25636e-08	5.26363e-09	1.57805e-08	7.54771e-09	0	5.34837e-09	0	6.05131e-09	2.72094e-08	2.53436e-09
1284.76	14.6612	5.20148e-07	5.07893e-07	4.96361e-07	4.7334e-07	4.44293e-07	4.53313e-07	4.4893e-07	4.16497e-07	3.95761e-07	3.73975e-07	3.55354e-07	3.10475e-07	3.4366e-07
1295.65	14.6497	1.25052e-06	1.2175e-06	1.18547e-06	1.11728e-06	1.10268e-06	1.05148e-06	1.03154e-06	1.03626e-06	9.89117e-07	9.51658e-07	8.67117e-07	8.35525e-07	8.40018e-07
1306.5	14.6907	2.88789e-07	2.88163e-07	2.87932e-07	2.71182e-07	2.80302e-07	2.50806e-07	2.66199e-07	2.40017e-07	2.4715e-07	2.24161e-07	2.23624e-07	1.97115e-07	1.87196e-07
1317.47	14.8011	4.77044e-06	4.63792e-06	4.51864e-06	4.3808e-06	4.26687e-06	4.16484e-06	4.05212e-06	3.89911e-06	3.75834e-06	3.67251e-06	3.49796e-06	3.45092e-06	3.202e-06
1328.54	14.8526	3.99824e-07	3.66974e-07	3.64019e-07	3.37374e-07	3.32357e-07	3.41511e-07	3.33609e-07	3.10613e-07	2.41776e-07	2.93562e-07	2.67814e-07	3.22827e-07	2.26393e-07
1339.4	14.642	2.08094e-06	1.98663e-06	1.95746e-06	1.92655e-06	1.82252e-06	1.80902e-06	1.73617e-06	1.72665e-06	1.65824e-06	1.60132e-06	1.53334e-06	1.48693e-06	1.44034e-06
1350.04	14.7152	7.39831e-07	7.73122e-07	7.09081e-07	6.75415e-07	6.04135e-07	5.8274e-07	5.78529e-07	5.11437e-07	5.1744e-07	4.71335e-07	4.59647e-07	3.98626e-07	3.84643e-07
1361.33	15.4178	2.1023e-08	1.49844e-08	9.38091e-09	9.56809e-09	1.39292e-08	2.23063e-08	1.95425e-08	8.54801e-09	7.73102e-09	1.58644e-08	1.67058e-08	1.21999e-08	2.1547e-08
1373.13	14.528	1.15484e-07	1.04302e-07	1.14174e-07	8.82074e-08	1.32359e-07	1.13551e-07	1.51135e-07	1.11508e-07	1.17575e-07	1.19701e-07	1.10243e-07	1.09208e-07	1.12124e-07
1383.51	15.022	2.65104e-08	1.75284e-08	1.14332e-08	1.66856e-08	1.09609e-08	1.77502e-08	2.4469e-08	3.20004e-08	2.0762e-08	2.16017e-08	1.53943e-08	2.88956e-08	1.84996e-08
1394.92	14.3512	1.51693e-09	2.59291e-09	1.57594e-09	0	0	0	4.5925e-09	0	6.17848e-09	1.12972e-09	3.26908e-09	4.94713e-09	0
1405.76	14.603	1.32707e-08	-3.09052e-09	7.54135e-10	3.35628e-09	0	0	0	0	4.08024e-09	0	0	0	0
1416.7	14.4414	8.87634e-10	1.54341e-08	1.76901e-09	0	0	6.39605e-09	8.32261e-10	1.09972e-09	0	0	1.45285e-09	3.82269e-09	0
1427.45	14.3086	6.39587e-05	6.35063e-05	6.2968e-05	6.24063e-05	6.18077e-05	6.11039e-05	6.02494e-05	5.94633e-05	5.84919e-05	5.73493e-05	5.61773e-05	5.49087e-05	5.35745e-05
1438.5	14.7756	0.000178169	0.000174829	0.000171367	0.000167637	0.000163892	0.000159966	0.000155938	0.000151778	0.000147336	0.000142592	0.000137771	0.000132839	0.000127861
1449.25	14.0094	2.61901e-05	2.54881e-05	2.48314e-05	2.40846e-05	2.32704e-05	2.25582e-05	2.17739e-05	2.10142e-05	2.01708e-05	1.9304e-05	1.84436e-05	1.75832e-05	1.6709e-05
1459.41	13.9458	6.7651e-07	6.36858e-07	5.96228e-07	5.76997e-07	5.11452e-07	5.44569e-07	4.5426e-07	3.88571e-07	4.53483e-07	3.83102e-07	3.6524e-07	3.67999e-07	3.32185e-07
1470.03	14.5203	4.96355e-06	4.90285e-06	4.81754e-06	4.66895e-06	4.63659e-06	4.50944e-06	4.41652e-06	4.26078e-06	4.19631e-06	4.05826e-06	3.91689e-06	3.77864e-06	3.64708e-06
1480.99	14.3435	4.61671e-06	4.51721e-06	4.37035e-06	4.32408e-06	4.27131e-06	4.10683e-06	4.00093e-06	3.82372e-06	3.77177e-06	3.61859e-06	3.53078e-06	3.38053e-06	3.25321e-06
1491.53	14.1138	1.73521e-06	1.70305e-06	1.68484e-06	1.58386e-06	1.51636e-06	1.45012e-06	1.43212e-06	1.38755e-06	1.30579e-06	1.30386e-06	1.2063e-06	1.17731e-06	1.11074e-06
1502.1	14.2618	1.13526e-06	1.15613e-06	1.11008e-06	1.08165e-06	1.04043e-06	1.0283e-06	1.01474e-06	9.58957e-07	9.29215e-07	8.72996e-07	8.50295e-07	8.19692e-07	7.81603e-07
1512.73	14.1849	1.22889e-08	2.50596e-08	8.02221e-09	1.66282e-08	1.34083e-08	1.68823e-08	1.77234e-08	8.72485e-09	7.29087e-09	6.02917e-09	4.67029e-09	1.45978e-09	9.8131e-09
1523.31	14.1186	1.88444e-06	1.86697e-06	1.76678e-06	1.79145e-06	1.6654e-06	1.63493e-06	1.55262e-06	1.48567e-06	1.3637e-06	1.37582e-06	1.28686e-06	1.21717e-06	1.16349e-06
1533.88	14.0897	2.37073e-05	2.31653e-05	2.25746e-05	2.20146e-05	2.14405e-05	2.08107e-05	2.02508e-05	1.95476e-05	1.89474e-05	1.83181e-05	1.75677e-05	1.68645e-05	1.61332e-05
1544.35	13.9804	1.31782e-05	1.29006e-05	1.25648e-05	1.22221e-05	1.19345e-05	1.15877e-05	1.12807e-05	1.0872e-05	1.05443e-05	1.01972e-05	9.78625e-06	9.39555e-06	8.9947e-06
1554.88	14.0528	2.4731e-07	2.63116e-07	2.54877e-07	2.00047e-07	2.77417e-07	2.28608e-07	2.71677e-07	2.17493e-07	2.56695e-07	1.11048e-07	1.80869e-07	1.74871e-07	1.6526e-07
1565.38	13.924	3.9528e-05	3.84789e-05	3.74657e-05	3.63741e-05	3.53359e-05	3.42055e-05	3.32188e-05	3.21858e-05	3.09186e-05	2.9613e-05	2.84404e-05	2.71943e-05	2.59137e-05
1575.67	13.7729	0.000152604	0.000148909	0.000145144	0.000141358	0.000137477	0.000133562	0.000129698	0.000125577	0.000121347	0.000116808	0.000112185	0.000107523	0.000102759
1585.92	13.7984	3.35338e-05	3.26433e-05	3.17808e-05	3.08561e-05	2.99876e-05	2.90891e-05	2.81896e-05	2.71256e-05	2.62896e-05	2.51779e-05	2.41251e-05	2.30685e-05	2.19808e-05
1596.24	13.7969	4.57285e-05	4.45412e-05	4.34254e-05	4.22211e-05	4.10478e-05	3.98305e-05	3.86555e-05	3.74217e-05	3.60969e-05	3.46964e-05	3.32647e-05	3.18217e-05	3.03388e-05
1606.5	13.7232	0.00014776	0.000144251	0.000140704	0.000137073	0.000133416	0.000129719	0.00012595	0.000122139	0.000118007	0.000113663	0.000109175	0.000104626	9.99833e-05
1616.86	13.8942	4.09397e-05	3.97871e-05	3.86393e-05	3.74898e-05	3.63033e-05	3.5097e-05	3.39689e-05	3.28074e-05	3.15579e-05	3.0204e-05	2.88644e-05	2.75059e-05	2.6124e-05
1627.04	13.4867	3.18785e-06	3.09383e-06	2.9709e-06	2.8895e-06	2.81878e-06	2.68557e-06	2.66045e-06	2.5619e-06	2.38666e-06	2.27525e-06	2.16003e-06	2.05298e-06	1.93153e-06
1637.06	13.4903	1.29175e-05	1.2597e-05	1.23052e-05	1.19574e-05	1.16305e-05	1.12646e-05	1.09812e-05	1.07315e-05	1.02688e-05	9.85058e-06	9.45269e-06	9.04953e-06	8.60407e-06
1647.21	13.4457	2.53739e-05	2.4825e-05	2.41744e-05	2.35821e-05	2.30758e-05	2.23799e-05	2.18061e-05	2.11626e-05	2.04766e-05	1.97303e-05	1.89673e-05	1.81796e-05	1.73717e-05
1656.95	12.8478	6.07824e-06	5.90148e-06	5.67633e-06	5.51025e-06	5.3378e-06	5.16004e-06	5.01705e-06	4.78997e-06	4.63897e-06	4.42563e-06	4.23708e-06	4.01688e-06	3.80145e-06
1667.11	13.578	1.43341e-06	1.38016e-06	1.34002e-06	1.19661e-06	1.26418e-06	1.21315e-06	1.13887e-06	1.12306e-06	1.06244e-06	1.01313e-06	9.78361e-07	9.07696e-07	8.89089e-07
1677.32	13.0764	3.22203e-07	2.40336e-07	2.89127e-07	2.80505e-07	2.1038e-07	3.15694e-07	4.15406e-07	2.26719e-07	2.36392e-07	2.19149e-07	2.14358e-07	1.99759e-07	2.08803e-07
1687.34	13.101	4.38358e-08	2.31907e-08	1.03193e-07	8.28761e-08	6.4844e-08	1.01996e-07	1.15319e-07	7.77061e-08	5.78133e-08	5.61569e-08	5.51712e-08	7.3361e-08	4.33156e-08
1697.21	13.2224	1.53604e-08	3.76946e-09	2.30881e-08	4.30558e-08	0	1.90233e-08	0	4.66547e-09	8.58921e-09	1.45237e-08	1.40501e-08	1.55448e-08	-2.94934e-09
1707.02	13.2015	2.33011e-09	4.6541e-08	6.04422e-08	0	1.74779e-08	0	3.00876e-09	5.36636e-09	9.30202e-09	1.90622e-08	4.59694e-09	-2.83264e-09	-5.96293e-09
1716.81	12.9751	0	1.20283e-08	2.47895e-08	0	3.11974e-08	0	3.44172e-09	4.79636e-09	1.53217e-08	1.53748e-08	1.24843e-08	-8.93666e-09	-2.04432e-09
1726.58	12.8046	-1.39795e-24	1.15781e-08	0	5.8177e-09	3.39125e-09	7.54356e-09	2.02321e-09	6.56715e-09	9.1542e-09	-8.24471e-09	4.69385e-09	-7.28986e-10	4.21922e-09
1736.38	12.8313	0	2.24711e-08	0	0	1.81988e-08	0	1.15866e-09	6.81389e-09	2.51306e-09	1.27594e-09	-2.05465e-09	-1.15685e-25	0
1746.1	13.0023	0	0	0	0	-8.12358e-09	2.64092e-08	-1.2008e-09	1.4291e-09	5.42193e-09	5.34424e-09	0	7.26302e-25	0
1755.77	13.0233	1.29012e-07	1.37278e-07	1.05032e-07	6.28912e-08	8.51592e-08	2.05833e-07	1.06829e-07	1.0436e-07	1.036e-07	9.8682e-08	9.03664e-08	6.15658e-08	7.69505e-08
1765.44	12.6574	4.44287e-08	5.76732e-08	1.23868e-07	1.67223e-07	4.22076e-08	1.14849e-07	7.01253e-08	5.42968e-08	7.37561e-08	5.2112e-08	7.08263e-08	5.26962e-08	2.71134e-08
1775.04	12.4278	2.06797e-08	4.29505e-24	7.57085e-09	4.21714e-08	1.97181e-08	5.82568e-09	7.57308e-09	9.44693e-09	1.4959e-08	1.0162e-08	2.45797e-08	3.61535e-08	1.5892e-08
1784.57	12.6008	9.32793e-08	4.25765e-08	6.47693e-08	5.36858e-08	1.45882e-08	1.09826e-07	6.18583e-08	6.05021e-08	5.95345e-08	6.93137e-08	5.14882e-08	8.50951e-08	3.09336e-08
1793.88	12.697	1.29885e-07	5.27821e-08	1.25035e-07	2.61663e-08	3.76831e-08	8.88672e-08	5.07458e-08	5.55947e-08	5.98188e-08	4.8305e-08	7.33966e-08	5.56781e-08	6.01191e-08
1803.51	12.5221	8.55597e-09	8.9783e-09	3.40171e-08	9.86558e-09	2.7982e-08	1.87126e-08	2.46539e-08	1.78505e-08	2.21318e-08	3.62963e-08	3.12983e-08	1.37571e-08	2.43229e-24
1812.93	12.2902	6.87378e-10	0	1.81685e-09	0	5.58325e-09	7.29559e-09	0	1.58392e-08	0	0	6.47036e-09	0	1.27742e-08
1822.29	12.8994	0	0	2.97579e-09	0	0	0	0	0	1.13107e-08	0	0	0	0
1831.86	12.321	0	0	0	0	0	0	0	0	0	0	0	0	0
1841.17	12.4709	0	0	0	0	0	0	0	0	0	0	0	0	0
1850.44	12.3586	0	0	0	0	2.02834e-09	0	0	0	0	0	0	0	0
1859.48	12.2035	0	0	0	0	0	0	0	1.4914e-08	0	3.33631e-08	0	0	0
1868.14	11.3546	1.89978e-07	1.43074e-07	1.84454e-07	1.46784e-07	1.99509e-07	1.68097e-07	2.14891e-07	2.31027e-07	1.76247e-07	2.1371e-07	1.52885e-07	1.6809e-07	1.98883e-07
1878.47	12.6107	3.25731e-05	3.22295e-05	3.18726e-05	3.14898e-05	3.10234e-05	3.0477e-05	2.98484e-05	2.91257e-05	2.82972e-05	2.74495e-05	2.63754e-05	2.53407e-05	2.41787e-05
1886.94	11.5635	2.25666e-05	2.23812e-05	2.21076e-05	2.19101e-05	2.16276e-05	2.12784e-05	2.08802e-05	2.04637e-05	1.9955e-05	1.94275e-05	1.88185e-05	1.81385e-05	1.74598e-05
1895.88	11.5962	2.11292e-06	2.10635e-06	2.06454e-06	2.01518e-06	1.97306e-06	1.92284e-06	2.00807e-06	1.85492e-06	1.80678e-06	1.7907e-06	1.714e-06	1.70074e-06	1.56681e-06
1904.73	12.5711	4.57318e-07	4.87108e-07	4.60754e-07	4.83014e-07	4.01296e-07	4.35256e-07	4.03203e-07	3.53397e-07	3.55331e-07	4.17318e-07	4.17224e-07	3.60365e-07	3.57276e-07
1914.15	11.7418	3.09153e-07	2.97208e-07	3.06274e-07	2.89506e-07	2.7518e-07	3.22408e-07	2.90388e-07	2.78036e-07	2.20815e-07	2.76181e-07	2.02075e-07	2.70402e-07	1.58267e-07
1923.18	12.0039	2.79916e-07	2.6514e-07	3.09428e-07	2.50236e-07	2.59955e-07	2.51788e-07	2.41234e-07	2.09646e-07	2.20125e-07	2.18836e-07	2.10523e-07	1.34842e-07	1.30884e-07
1932.06	11.6661	1.71913e-06	1.61279e-06	1.54459e-06	1.47884e-06	1.3783e-06	1.30346e-06	1.26719e-06	1.17999e-06	1.1052e-06	1.01055e-06	9.32255e-07	8.15697e-07	8.11301e-07
1940.92	11.8169	0.000109754	0.000105489	0.000101247	9.69141e-05	9.26331e-05	8.83049e-05	8.39605e-05	7.95051e-05	7.48187e-05	6.99573e-05	6.49125e-05	5.98265e-05	5.48766e-05
1949.71	11.5385	0.000602832	0.000586887	0.000570487	0.000553528	0.000536002	0.000518136	0.000499585	0.000479829	0.000458785	0.000435903	0.000411498	0.000386561	0.000360995
1958.44	11.4733	0.000953171	0.000932599	0.000911069	0.000888442	0.000864583	0.000839615	0.000813293	0.000784815	0.000753868	0.000719585	0.000682476	0.000643577	0.00060397
1967.13	11.5707	0.000730782	0.000711876	0.000692549	0.000672765	0.000652445	0.000631774	0.000610484	0.000587833	0.000563471	0.000536715	0.000508103	0.000478323	0.000447739
1975.83	11.4434	0.000201853	0.000196612	0.000191339	0.000185903	0.00018036	0.000174738	0.000169023	0.000162934	0.000156374	0.000149145	0.000141423	0.000133385	0.000125069
1984.58	11.6345	3.72376e-05	3.6153e-05	3.51651e-05	3.41016e-05	3.30572e-05	3.19925e-05	3.08863e-05	2.97483e-05	2.85174e-05	2.71329e-05	2.57276e-05	2.41852e-05	2.26057e-05
1993.29	11.3157	0.000158984	0.000155573	0.000152159	0.000148619	0.000144946	0.000141167	0.000137234	0.00013296	0.000128291	0.000123088	0.000117325	0.000111275	0.000104835
2001.88	11.4422	0.00157857	0.00154415	0.00150823	0.00147057	0.00143082	0.00138899	0.00134455	0.00129653	0.00124396	0.00118576	0.00112175	0.00105468	0.0009863
2010.46	11.2577	0.00202866	0.00197274	0.00191541	0.00185628	0.00179528	0.00173223	0.00166656	0.0015967	0.00152152	0.00143956	0.00135135	0.00126038	0.00116905
2019.09	11.3366	0.00126243	0.00122871	0.00119426	0.00115893	0.00112248	0.00108522	0.00104664	0.00100532	0.000960825	0.000911954	0.00085934	0.000804586	0.000748364
2027.54	11.1218	0.000408723	0.000396543	0.00038433	0.000372003	0.000359506	0.00034703	0.000334308	0.000320909	0.000306545	0.000290704	0.00027397	0.000256615	0.000238421
2036.04	11.2636	0.000224122	0.000218263	0.000212402	0.000206473	0.000200428	0.000194403	0.000188207	0.000181647	0.000174544	0.000166678	0.000158179	0.000149378	0.000139951
2044.46	11.0174	0.000316664	0.000309137	0.00030149	0.000293721	0.000285751	0.000277736	0.000269479	0.000260727	0.000251163	0.000240455	0.000228894	0.000216668	0.000203704
2052.82	11.071	0.00079375	0.000773349	0.000752681	0.000731615	0.000710015	0.000688151	0.000665647	0.000641645	0.000615504	0.00058659	0.00055523	0.000522462	0.000487885
2061.17	10.9786	0.000610677	0.00059592	0.000580977	0.000565647	0.000549955	0.000534065	0.00051762	0.000500058	0.00048083	0.000459414	0.000436132	0.000411578	0.000385549
2069.56	11.1227	0.000602537	0.000586346	0.000569964	0.000553299	0.000536377	0.000519349	0.000501908	0.000483333	0.00046324	0.000440979	0.000417046	0.000391962	0.000365362
2077.8	10.9102	0.000334601	0.000325666	0.000316693	0.000307584	0.000298307	0.000288968	0.000279485	0.00026932	0.000258383	0.000246138	0.000233076	0.000219281	0.000204618
2086.15	11.0754	0.00022877	0.000222078	0.000215386	0.000208652	0.000201839	0.000195022	0.00018814	0.000180853	0.000173039	0.000164333	0.000155113	0.000145392	0.00013514
2094.44	10.8328	0.000103685	0.000100502	9.73212e-05	9.4135e-05	9.09112e-05	8.77553e-05	8.45539e-05	8.11446e-05	7.7546e-05	7.35483e-05	6.93674e-05	6.4918e-05	6.02127e-05
2102.57	10.8621	3.66061e-05	3.55524e-05	3.45514e-05	3.35353e-05	3.25218e-05	3.15007e-05	3.04393e-05	2.93488e-05	2.82206e-05	2.68849e-05	2.55791e-05	2.40184e-05	2.24702e-05
2110.82	10.851	2.22088e-05	2.16571e-05	2.11338e-05	2.05906e-05	2.00443e-05	1.94419e-05	1.88753e-05	1.82853e-05	1.76243e-05	1.69121e-05	1.60188e-05	1.51901e-05	1.42834e-05
2118.99	10.8112	9.82779e-06	9.64816e-06	9.37918e-06	9.12904e-06	8.85297e-06	8.53666e-06	8.25358e-06	7.99035e-06	7.63919e-06	7.28474e-06	6.90654e-06	6.43909e-06	6.11522e-06
2127.12	10.6388	2.13763e-06	2.01887e-06	1.94943e-06	1.88708e-06	1.86488e-06	1.77754e-06	1.75654e-06	1.67421e-06	1.60719e-06	1.51398e-06	1.39914e-06	1.33429e-06	1.18057e-06
2135.24	10.7428	1.44571e-06	1.41015e-06	1.37902e-06	1.3226e-06	1.27217e-06	1.24245e-06	1.18439e-06	1.11424e-06	1.05784e-06	1.0387e-06	9.61413e-07	8.69638e-07	8.58361e-07
2143.22	10.5323	3.9689e-06	3.90861e-06	3.80047e-06	3.69924e-06	3.5808e-06	3.50549e-06	3.42092e-06	3.31178e-06	3.24138e-06	3.07161e-06	3.00546e-06	2.83551e-06	2.64223e-06
2151.13	10.577	1.39901e-05	1.37129e-05	1.3414e-05	1.31311e-05	1.28173e-05	1.25168e-05	1.22122e-05	1.18932e-05	1.14769e-05	1.10816e-05	1.05274e-05	1.01102e-05	9.45011e-06
2159.29	10.8203	9.83669e-06	9.60997e-06	9.414e-06	9.19626e-06	9.00973e-06	8.78224e-06	8.5737e-06	8.3415e-06	8.06216e-06	7.80051e-06	7.41808e-06	7.02698e-06	6.7167e-06
2167.24	10.2622	7.88422e-06	7.69226e-06	7.50837e-06	7.3181e-06	7.12971e-06	6.94334e-06	6.73789e-06	6.48461e-06	6.31236e-06	6.00006e-06	5.77339e-06	5.45096e-06	5.05727e-06
2175.09	10.6874	2.73254e-06	2.65064e-06	2.58242e-06	2.52446e-06	2.44351e-06	2.3871e-06	2.30696e-06	2.24269e-06	2.18619e-06	2.02713e-06	1.94212e-06	1.91438e-06	1.77511e-06
2183.15	10.3148	5.96824e-07	5.78002e-07	5.62103e-07	5.56543e-07	4.92299e-07	5.34633e-07	5.33772e-07	4.64332e-07	4.96645e-07	4.67986e-07	4.37304e-07	3.9384e-07	3.36401e-07
2190.83	10.3889	6.60669e-07	6.3721e-07	6.10085e-07	6.04454e-07	5.87436e-07	5.89673e-07	5.71124e-07	5.32805e-07	5.22423e-07	4.45803e-07	5.0797e-07	4.6523e-07	2.6283e-07
2198.86	10.5417	1.71042e-07	1.7395e-07	1.54087e-07	1.48528e-07	1.51167e-07	1.45048e-07	1.3765e-07	1.15908e-07	1.28651e-07	1.30924e-07	1.49271e-07	1.30708e-07	1.48951e-07
2206.59	10.1254	1.14779e-07	1.08747e-07	1.01537e-07	8.87561e-08	9.44487e-08	8.82392e-08	1.09404e-07	4.55119e-08	5.69754e-08	2.15525e-08	6.28691e-08	9.72175e-09	3.0945e-08
2214.33	10.3834	2.27324e-07	2.25325e-07	2.06426e-07	2.31113e-07	2.00682e-07	2.45606e-07	1.67298e-07	1.69186e-07	1.9013e-07	1.63973e-07	1.2815e-07	3.28495e-08	7.26624e-08
2222.15	10.1301	1.65757e-07	1.64247e-07	1.39513e-07	1.55003e-07	1.45584e-07	2.07331e-07	1.17231e-07	1.00454e-07	8.13435e-08	1.296e-07	1.01418e-07	1.40206e-07	7.55021e-08
2229.74	10.3142	1.19395e-07	1.33518e-07	7.24495e-08	1.06886e-07	1.04879e-07	1.05356e-07	8.09364e-08	1.01529e-07	8.33735e-08	4.63016e-08	2.783e-08	8.44365e-08	6.2399e-08
2237.62	10.273	3.41841e-08	3.58858e-08	1.62287e-08	4.27649e-08	2.59458e-08	2.14928e-08	1.48782e-08	2.37239e-08	2.39046e-08	1.10515e-08	7.13692e-09	5.52074e-08	1.67976e-08
2245.2	10.1004	7.54228e-08	4.00842e-08	5.96401e-08	5.21291e-08	1.62377e-08	3.67661e-08	5.81151e-08	3.04672e-08	4.21277e-08	2.91952e-08	3.17065e-08	0	7.87712e-08
2252.83	10.165	1.73273e-07	1.60177e-07	1.46481e-07	1.4498e-07	1.36771e-07	1.36291e-07	1.13921e-07	9.64248e-08	1.60652e-07	4.68029e-08	1.38936e-07	1.04669e-07	1.20615e-07
2260.58	10.1894	1.02217e-07	1.51837e-07	1.07618e-07	6.50663e-08	1.3728e-07	1.14254e-07	5.59335e-08	5.08451e-08	8.31594e-08	1.48143e-07	1.62416e-07	4.83621e-08	3.19021e-08
2268.02	9.94387	4.15951e-08	2.84971e-08	3.87316e-08	1.92389e-08	5.1165e-08	3.16063e-09	1.70009e-08	2.17376e-08	3.31277e-08	6.63866e-08	4.98591e-09	2.47251e-08	6.96508e-08
2275.74	10.1886	6.05206e-08	6.54928e-08	6.88823e-08	5.75992e-08	6.7592e-08	4.49828e-08	2.40456e-08	1.04796e-07	1.52774e-08	6.00916e-08	7.49861e-08	4.92135e-08	6.64837e-08
2283.2	9.78521	7.36457e-09	6.18655e-08	1.35317e-08	3.94463e-08	1.46196e-08	8.38828e-09	8.4294e-09	2.10019e-08	0	6.21593e-08	1.42683e-08	5.092e-08	-2.54149e-08
2290.54	10.0038	3.95858e-09	2.57647e-08	5.53107e-09	1.17594e-08	1.41541e-08	8.81189e-09	1.66881e-08	0	1.23013e-08	0	0	0	0
2298.27	9.97127	-3.40761e-24	1.94428e-08	6.89031e-09	0	0	-7.2076e-09	0	0	1.44834e-08	0	0	0	0
2305.44	9.63447	0	1.45343e-08	3.42291e-09	2.202e-08	0	-7.7816e-09	0	0	0	0	0	0	0
2312.87	10.1359	0	0	0	-3.93376e-24	-1.6201e-08	2.2494e-08	0	0	0	0	-2.2624e-08	0	0
2320.56	9.74905	0	0	0	0	1.00372e-08	0	0	0	0	0	0	0	0
2327.54	9.65826	0	0	0	0	9.67022e-09	0	0	0	0	0	0	0	0
2335.15	10.0542	5.0675e-09	0	0	0	9.54242e-09	0	0	0	0	0	0	-3.06702e-08	-1.02176e-08
2342.53	9.56876	0	0	0	0	0	0	0	0	0	0	0	0	9.39592e-09
2349.51	9.55708	3.91165e-09	0	0	0	0	0	0	0	0	0	0	0	6.83204e-09
2356.96	9.92805	3.35719e-09	0	0	0	0	0	1.49611e-08	0	0	0	-6.07671e-08	0	1.05428e-09
2364.29	9.46855	1.48769e-09	0	1.42667e-08	0	0	0	1.95964e-08	0	0	0	0	0	7.94616e-09
2371.27	9.49267	0	1.92582e-08	0	0	0	0	0	0	0	-1.41894e-08	0	-7.95057e-08	0
2378.44	9.61255	0	0	0	0	2.4149e-08	0	0	0	0	0	0	-6.29212e-08	3.5664e-09
2385.73	9.63909	0	0	1.48356e-08	5.32648e-09	0	0	1.4278e-08	0	0	0	0	0	2.00752e-08
2392.76	9.29032	-1.29342e-08	0	3.18482e-08	0	0	0	1.19871e-08	0	0	0	0	0	-7.11278e-09
2399.73	9.60672	0	0	1.45232e-08	0	0	0	0	0	0	0	0	0	1.39374e-09
2407.24	9.64439	-5.32266e-09	0	0	7.50933e-09	1.82277e-08	0	0	0	0	0	0	0	-1.61147e-09
2414.09	8.96147	-6.07989e-09	9.27825e-09	0	8.49579e-09	0	0	0	0	1.90278e-08	0	0	0	-6.89824e-09
2420.91	9.61238	0	1.64657e-08	0	0	0	1.30987e-08	0	0	0	0	0	0	-3.91598e-09
2428.33	9.44559	0	0	0	0	0	0	0	0	-5.01857e-08	0	0	0	-3.90422e-09
2435.22	9.3097	7.75933e-09	8.61295e-09	1.83368e-08	0	0	0	0	0	0	0	3.06247e-23	0	-1.24795e-09
2442.07	8.81877	5.3502e-09	5.98904e-09	2.17099e-08	0	0	0	0	2.04133e-08	0	0	9.67203e-24	0	-3.52401e-09
2448.81	9.38408	0	0	0	0	0	0	1.36249e-23	0	0	7.22747e-09	0	0	0
2456.2	9.35962	0	0	0	0	0	0	0	1.65315e-08	0	1.81059e-08	0	2.06672e-23	-1.61412e-08
2462.72	8.86375	0	0	0	2.24135e-08	0	0	3.83601e-08	0	0	0	0	2.05242e-23	1.84433e-08
2469.32	9.10723	1.07739e-08	4.06748e-08	4.02613e-08	3.37177e-08	8.25451e-08	4.14994e-08	4.95288e-08	2.56145e-08	0	9.10594e-08	4.33194e-09	2.81872e-08	1.13977e-08
2476.64	9.57509	0	5.04874e-08	5.3263e-08	0	0	4.55485e-08	0	4.63078e-08	1.11274e-07	0	6.40712e-08	3.26232e-08	0
2483.46	8.89409	2.36533e-06	2.34337e-06	2.26302e-06	2.22342e-06	2.11038e-06	2.02345e-06	1.86686e-06	1.89916e-06	1.69189e-06	1.6661e-06	1.54896e-06	1.4428e-06	1.33001e-06
2489.9	8.98538	2.63568e-06	2.55856e-06	2.51149e-06	2.33225e-06	2.28665e-06	2.18782e-06	2.07782e-06	2.18106e-06	2.01056e-06	1.86244e-06	1.81927e-06	1.59013e-06	1.45554e-06
2496.76	9.439	1.4237e-06	1.29878e-06	1.32868e-06	1.26319e-06	1.24595e-06	1.0794e-06	1.15201e-06	1.11602e-06	1.02566e-06	9.44092e-07	8.95644e-07	8.78831e-07	7.7963e-07
