# Supplementary material for: Towards global carbon transparency: Spaceborne imaging spectroscopy enables precise CO2 emission quantification at facility scale
Source: Research Square preprint supplement (doi:10.21203/rs.3.rs-5913782/v1), 2025-01-29
Supplement: Supplementary file 20 [file CO2_k_v3.xlsx]

## Sheet: k_ZY1E
Wavelength	FWHM	k_Summer_L	k_Summer_M	k_Summer_H	k_Winter_L	k_Winter_M	k_Winter_H	k_1976_L	k_1976_M	k_1976_H
1005.6	16.26	0	0	0	0	0	0	0	0	0
1022.21	16.26	0	0	0	0	0	0	0	0	0
1039.19	16.26	3.27268e-07	3.26182e-07	3.27084e-07	3.25465e-07	3.33244e-07	3.3513e-07	3.2991e-07	3.29784e-07	3.27622e-07
1055.87	16.26	8.46329e-07	8.40583e-07	8.34483e-07	8.53716e-07	8.52689e-07	8.52306e-07	8.33402e-07	8.39475e-07	8.43304e-07
1072.55	16.26	9.4457e-08	1.00036e-07	9.84855e-08	9.65519e-08	9.36293e-08	1.06459e-07	9.71434e-08	9.415e-08	1.06061e-07
1089.23	16.26	1.01901e-09	0	1.65609e-09	1.07924e-09	2.26436e-09	1.12287e-09	2.56203e-09	1.74319e-09	1.47672e-09
1105.91	16.26	0	0	0	0	0	0	0	0	0
1122.59	16.26	0	0	0	1.56866e-09	0	0	0	0	0
1139.44	16.26	0	0	0	8.81799e-10	0	0	1.96596e-09	0	5.11312e-09
1156.41	16.26	0	0	0	0	0	0	0	0	0
1173.29	16.26	0	0	0	0	0	0	0	0	0
1190.17	16.26	0	0	1.45695e-09	0	0	0	0	0	0
1207.04	16.26	2.43161e-05	2.38282e-05	2.33946e-05	2.44492e-05	2.39663e-05	2.35195e-05	2.42655e-05	2.3778e-05	2.33457e-05
1223.92	16.26	1.73054e-05	1.73606e-05	1.74315e-05	1.74219e-05	1.74721e-05	1.75424e-05	1.72798e-05	1.73187e-05	1.73905e-05
1240.8	16.26	5.58096e-07	5.6033e-07	5.62307e-07	5.37684e-07	5.3734e-07	5.39964e-07	5.62756e-07	5.5849e-07	5.49042e-07
1257.4	16.26	2.36254e-07	2.39754e-07	2.34598e-07	2.29333e-07	2.33442e-07	2.32239e-07	2.32789e-07	2.34686e-07	2.31532e-07
1274.15	16.26	1.58506e-08	1.28712e-08	1.85121e-08	1.22642e-08	2.04663e-08	1.47676e-08	1.90866e-08	1.08922e-08	1.52392e-08
1290.9	16.26	1.4972e-06	1.47822e-06	1.48829e-06	1.49658e-06	1.49604e-06	1.49687e-06	1.49629e-06	1.4906e-06	1.48035e-06
1307.65	16.26	1.7183e-06	1.65125e-06	1.52707e-06	1.71459e-06	1.65199e-06	1.5392e-06	1.70494e-06	1.64658e-06	1.52117e-06
1324.4	16.26	2.74215e-06	2.85178e-06	3.03123e-06	2.72219e-06	2.84431e-06	3.00998e-06	2.71455e-06	2.83458e-06	3.00238e-06
1341.16	16.26	2.63351e-06	2.73141e-06	2.71519e-06	2.61751e-06	2.73825e-06	2.78752e-06	2.60444e-06	2.69786e-06	2.74682e-06
1357.91	16.26	1.70236e-07	6.93817e-08	5.29985e-08	1.5523e-07	1.34228e-07	6.11535e-08	1.19779e-07	1.27939e-07	3.93124e-08
1374.87	16.26	2.59156e-07	2.2678e-07	8.71806e-08	2.40946e-07	2.03445e-07	8.10103e-08	2.34874e-07	2.04394e-07	8.23527e-08
1391.65	16.26	2.94699e-08	9.44961e-09	0	0	1.20444e-08	1.62721e-08	1.50932e-09	1.19659e-08	9.6333e-25
1408.49	16.26	2.57841e-25	0	1.20026e-08	4.36623e-10	0	0	0	0	0
1425.33	16.26	6.04838e-05	5.48626e-05	5.00026e-05	6.13884e-05	5.535e-05	4.99105e-05	6.09532e-05	5.5127e-05	4.97181e-05
1442.17	16.26	0.000162935	0.000155724	0.000136734	0.000157508	0.000150938	0.000134165	0.000158957	0.000151995	0.000133774
1459.01	16.26	1.93085e-06	1.78698e-06	1.60024e-06	1.34526e-06	1.23583e-06	1.09995e-06	1.52028e-06	1.39498e-06	1.25944e-06
1475.85	16.26	9.68132e-06	9.10333e-06	8.19534e-06	9.79051e-06	9.22067e-06	8.3386e-06	9.71379e-06	9.15581e-06	8.22585e-06
1492.7	16.26	2.44411e-06	2.54572e-06	2.71053e-06	2.3801e-06	2.48681e-06	2.64458e-06	2.40064e-06	2.49883e-06	2.66468e-06
1509.54	16.26	8.76065e-08	7.67331e-08	6.728e-08	6.00617e-08	6.17015e-08	6.37469e-08	5.74497e-08	5.87854e-08	5.91125e-08
1526.38	16.26	9.98106e-06	1.00807e-05	1.0282e-05	9.38354e-06	9.47386e-06	9.6388e-06	9.58934e-06	9.68146e-06	9.86809e-06
1543.22	16.26	1.96449e-05	1.96127e-05	1.95607e-05	2.00291e-05	2.00183e-05	1.99746e-05	1.97598e-05	1.9729e-05	1.96924e-05
1560.06	16.26	2.26508e-06	2.2661e-06	2.26809e-06	1.84218e-06	1.84421e-06	1.84172e-06	2.00572e-06	2.00947e-06	2.01031e-06
1576.9	16.26	0.000173463	0.000173451	0.000173416	0.000175287	0.000175286	0.000175241	0.00017365	0.000173634	0.00017359
1593.71	16.26	3.46424e-05	3.46575e-05	3.47105e-05	3.32791e-05	3.32998e-05	3.33501e-05	3.37047e-05	3.37352e-05	3.37863e-05
1610.39	16.26	0.000131769	0.000131772	0.000131756	0.00013292	0.000132938	0.000132925	0.000131784	0.00013179	0.000131788
1627.13	16.26	5.1712e-06	5.17376e-06	5.18825e-06	4.48133e-06	4.48792e-06	4.48086e-06	4.75445e-06	4.76498e-06	4.76348e-06
1644.01	16.26	2.91905e-05	2.9191e-05	2.92e-05	2.97808e-05	2.9791e-05	2.97994e-05	2.93977e-05	2.94086e-05	2.94181e-05
1660.89	16.26	4.66525e-06	4.65739e-06	4.6551e-06	4.01692e-06	4.019e-06	4.02559e-06	4.25869e-06	4.26752e-06	4.25684e-06
1677.77	16.26	4.77546e-07	4.58903e-07	4.65488e-07	3.91314e-07	4.10692e-07	4.00583e-07	4.12722e-07	4.3553e-07	4.29643e-07
1694.65	16.26	2.63079e-08	2.5698e-08	3.58079e-08	4.76467e-08	1.55826e-08	3.91029e-08	3.43497e-08	2.18905e-08	2.84548e-08
1711.53	16.26	1.4957e-08	1.99483e-08	1.3662e-08	1.67938e-08	1.60499e-08	1.99369e-08	2.37535e-08	2.08555e-08	2.32109e-08
1728.41	16.26	7.65076e-09	8.44932e-09	1.81939e-09	1.63416e-08	1.84641e-09	4.08781e-09	1.27527e-24	6.90643e-09	1.87919e-08
1745.28	16.26	9.62695e-09	5.52307e-09	6.4728e-09	3.47033e-09	4.10343e-09	3.43257e-09	4.79425e-09	4.81583e-09	4.4541e-09
1762.16	16.26	2.32824e-07	2.48397e-07	2.58422e-07	1.65602e-07	1.5823e-07	1.75344e-07	2.08206e-07	1.9992e-07	2.15504e-07
1778.85	16.26	7.21648e-08	4.08103e-08	4.64766e-08	3.68304e-08	2.1867e-08	2.54064e-08	3.71827e-08	3.02768e-08	3.3518e-08
1795.43	16.26	1.70524e-07	1.75471e-07	1.75305e-07	1.2988e-07	1.35589e-07	1.53574e-07	1.38131e-07	1.25403e-07	2.13953e-07
1812.02	16.26	3.3197e-08	2.01024e-08	1.93502e-07	1.11075e-08	1.70815e-08	2.95664e-25	2.78173e-08	3.35829e-08	7.36887e-09
1828.82	16.26	0	0	0	0	1.49481e-10	0	0	1.43042e-09	0
1845.62	16.26	0	0	0	0	0	0	0	0	0
1862.42	16.26	1.41971e-08	7.62829e-08	2.48798e-08	7.06554e-09	9.49841e-09	1.94118e-08	7.49439e-09	6.93578e-09	1.58297e-08
1880.13	16.26	4.88279e-05	4.51637e-05	2.22807e-05	4.96567e-05	4.5478e-05	1.86554e-05	4.90639e-05	4.49971e-05	2.06569e-05
1896.11	16.26	6.47708e-06	6.76033e-06	3.15304e-06	6.03219e-06	6.61483e-06	2.72045e-06	6.17155e-06	6.54736e-06	2.79266e-06
1912.97	16.26	9.75607e-07	7.01776e-07	3.16208e-07	7.99999e-07	5.47597e-07	1.81972e-07	7.75733e-07	5.87782e-07	2.60239e-07
1929.93	16.26	2.88785e-06	3.52865e-06	3.782e-06	1.96072e-06	2.55152e-06	3.08802e-06	2.23539e-06	2.92913e-06	3.2845e-06
1946.82	16.26	0.000580872	0.000649353	0.000713709	0.000530707	0.000601143	0.000685059	0.000550631	0.000619329	0.000692567
1963.72	16.26	0.00104665	0.00101352	0.00097421	0.00106603	0.00103543	0.000999943	0.00105161	0.0010197	0.000981431
1980.61	16.26	0.000132449	0.000131013	0.000126699	0.000123091	0.000122262	0.000119225	0.000126692	0.000125581	0.000121959
1997.51	16.26	0.000528199	0.000529792	0.000534596	0.000503138	0.000505274	0.000510508	0.000514188	0.000516097	0.000521151
2014.4	16.26	0.00231907	0.00231795	0.00231429	0.00228833	0.00228742	0.00228537	0.0022932	0.00229229	0.00228934
2031.3	16.26	0.00042013	0.000419236	0.000417628	0.000374376	0.000373904	0.000372901	0.000392519	0.00039188	0.000390614
2048.13	16.26	0.000590125	0.00059229	0.000595886	0.000587405	0.000589055	0.000591895	0.000586367	0.000588208	0.000591474
2064.9	16.26	0.000765486	0.000766141	0.000767236	0.00078164	0.000782473	0.000783859	0.00077059	0.000771341	0.000772563
2081.61	16.26	0.000387454	0.00038645	0.000384661	0.000350033	0.000349085	0.000347374	0.000364958	0.000363984	0.000362254
2098.45	16.26	9.28181e-05	9.2853e-05	9.28476e-05	7.97098e-05	7.96698e-05	7.96384e-05	8.47382e-05	8.47719e-05	8.46959e-05
2115.29	16.26	2.1415e-05	2.13624e-05	2.12628e-05	1.99453e-05	1.99157e-05	1.97978e-05	2.03095e-05	2.02842e-05	2.01716e-05
2132.13	16.26	2.35504e-06	2.33595e-06	2.34467e-06	1.89412e-06	1.92496e-06	1.91514e-06	2.13883e-06	2.14801e-06	2.15668e-06
2148.97	16.26	1.18777e-05	1.18395e-05	1.17471e-05	1.20493e-05	1.19974e-05	1.18743e-05	1.19048e-05	1.18665e-05	1.17603e-05
2165.81	16.26	1.06539e-05	1.06258e-05	1.06213e-05	1.0537e-05	1.05359e-05	1.05177e-05	1.05394e-05	1.05331e-05	1.05173e-05
2182.64	16.26	1.19391e-06	1.20972e-06	1.21809e-06	1.12384e-06	1.10631e-06	1.12542e-06	1.15187e-06	1.15638e-06	1.1717e-06
2199.48	16.26	3.10118e-07	3.38841e-07	3.37027e-07	2.48497e-07	2.38776e-07	2.57078e-07	2.78526e-07	2.48621e-07	2.94464e-07
2216.32	16.26	2.60394e-07	2.51447e-07	2.19028e-07	2.71056e-07	2.39165e-07	2.38461e-07	2.01365e-07	2.89643e-07	2.60935e-07
2233.16	16.26	1.04093e-07	1.08517e-07	7.67048e-08	6.77123e-08	8.57523e-08	7.54812e-08	1.05597e-07	7.94773e-08	7.47634e-08
2250	16.26	1.46335e-07	1.42764e-07	1.44685e-07	1.42006e-07	1.60704e-07	1.4098e-07	1.50402e-07	1.50068e-07	1.3549e-07
2266.84	16.26	3.97587e-08	7.78362e-08	6.92088e-08	6.80255e-08	4.73105e-08	8.54509e-08	4.10805e-08	3.72122e-08	3.03723e-08
2283.67	16.26	3.19956e-08	6.7108e-08	5.19627e-08	1.64965e-08	1.97955e-08	2.81958e-08	3.98581e-08	5.8928e-08	4.93499e-08
2300.51	16.26	1.2535e-08	0	0	1.90053e-08	0	8.7557e-09	1.18457e-08	0	5.373e-09
2317.35	16.26	0	1.38182e-08	0	7.29725e-09	5.57185e-09	5.77902e-09	0	6.87651e-09	0
2334.19	16.26	0	1.08536e-08	0	0	0	0	0	0	0
2350.4	16.26	0	0	0	0	0	0	0	0	0
2366.68	16.26	0	0	0	0	0	0	6.71628e-09	0	4.68073e-09
2384.12	16.26	0	0	0	0	0	0	4.52283e-09	2.31069e-08	2.13072e-08
2400.81	16.26	0	0	6.61232e-09	0	0	0	0	1.59579e-08	0
2417.5	16.26	0	0	0	0	0	1.09167e-08	0	1.82392e-08	1.18945e-08
2434.19	16.26	0	9.07533e-09	0	1.71037e-08	0	0	1.32405e-08	0	1.01375e-09
2450.88	16.26	0	0	2.98745e-10	0	2.57056e-08	3.77998e-08	0	1.10444e-08	0
2467.57	16.26	8.90168e-08	4.00694e-08	6.02177e-08	4.30856e-08	2.72864e-08	9.86482e-08	7.10421e-08	2.35181e-08	3.29989e-08
2484.32	16.26	3.17262e-06	2.77443e-06	2.01242e-06	2.4374e-06	2.12674e-06	1.56873e-06	2.70603e-06	2.3684e-06	1.69786e-06
2501.08	16.26	1.70121e-06	1.791e-06	1.84544e-06	1.53248e-06	1.55795e-06	1.66126e-06	1.56765e-06	1.57586e-06	1.65252e-06

## Sheet: k_ZY1F
Wavelength	FWHM	k_Summer_L	k_Summer_M	k_Summer_H	k_Winter_L	k_Winter_M	k_Winter_H	k_1976_L	k_1976_M	k_1976_H
1009.7	16.848	0	0	0	0	0	0	0	0	0
1026.55	16.846	0	0	0	0	0	0	0	0	0
1043.4	16.846	7.02163e-07	6.95601e-07	6.94069e-07	7.08768e-07	7.17342e-07	7.18305e-07	6.9893e-07	6.9922e-07	6.9887e-07
1060.24	16.849	3.972e-07	3.90347e-07	3.86831e-07	3.90084e-07	3.80318e-07	3.84062e-07	3.85829e-07	3.89766e-07	3.80592e-07
1077.09	16.845	2.73964e-08	3.01405e-08	3.2019e-08	2.1956e-08	1.84226e-08	2.71937e-08	2.57689e-08	2.39438e-08	2.91288e-08
1093.94	16.845	1.05093e-09	1.57192e-09	1.1797e-09	0	1.39097e-09	-1.00524e-09	6.38878e-10	1.3835e-09	0
1110.78	16.848	7.32857e-10	0	1.52962e-09	1.01977e-09	0	3.1762e-25	0	0	0
1127.63	16.848	0	0	0	9.98181e-10	0	0	0	0	0
1144.48	16.845	0	0	0	0	0	0	0	0	0
1161.32	16.849	0	0	0	0	0	0	0	0	0
1178.17	16.845	0	0	0	0	0	0	0	1.75059e-09	0
1195.02	16.848	7.93251e-07	7.93245e-07	7.87102e-07	7.38395e-07	7.42188e-07	7.3822e-07	7.60459e-07	7.59321e-07	7.57315e-07
1211.86	16.845	2.47914e-05	2.44717e-05	2.4182e-05	2.49061e-05	2.45828e-05	2.42986e-05	2.47326e-05	2.44133e-05	2.41307e-05
1228.71	16.848	8.41025e-06	8.42877e-06	8.44228e-06	8.30451e-06	8.32079e-06	8.32863e-06	8.30587e-06	8.31558e-06	8.32028e-06
1245.56	16.848	2.61715e-07	2.57339e-07	2.58586e-07	2.52642e-07	2.49082e-07	2.47454e-07	2.49977e-07	2.52932e-07	2.50464e-07
1262.4	16.846	2.13246e-07	2.1146e-07	2.154e-07	2.12505e-07	2.14282e-07	2.22802e-07	2.1955e-07	2.08892e-07	1.97608e-07
1279.25	16.845	3.99628e-08	3.41869e-08	3.52504e-08	3.05667e-08	2.72363e-08	3.42219e-08	3.10343e-08	2.66255e-08	2.66647e-08
1296.09	16.849	1.38007e-06	1.39265e-06	1.42402e-06	1.39663e-06	1.40498e-06	1.42318e-06	1.38206e-06	1.38904e-06	1.42155e-06
1312.94	16.845	4.39372e-06	4.30881e-06	4.15502e-06	4.47315e-06	4.39057e-06	4.24588e-06	4.41944e-06	4.33797e-06	4.18777e-06
1329.79	16.846	9.10666e-07	9.19406e-07	8.95969e-07	8.37446e-07	8.36677e-07	8.36118e-07	8.55796e-07	8.64696e-07	8.54682e-07
1346.63	16.848	2.19017e-06	2.63012e-06	3.01389e-06	2.17768e-06	2.71822e-06	3.10539e-06	2.1727e-06	2.66271e-06	3.02935e-06
1363.48	16.848	8.33214e-08	8.02924e-08	1.78936e-08	1.07844e-07	3.50298e-08	2.32387e-08	1.10575e-07	7.7962e-08	1.84337e-08
1380.33	16.845	1.68477e-07	1.50597e-07	6.14734e-08	1.57596e-07	1.58454e-07	3.85958e-08	1.76213e-07	1.53719e-07	3.80971e-08
1397.17	16.848	6.42847e-11	0	0	1.31838e-08	0	0	0	0	3.74058e-09
1414.02	16.848	1.62309e-09	1.01215e-08	-1.4015e-09	4.42596e-09	0	1.09175e-08	3.29826e-09	0	4.52296e-10
1430.87	16.845	0.000163945	0.000151492	0.00013066	0.000168047	0.000155396	0.000134126	0.00016576	0.000153195	0.000131765
1447.71	16.846	6.63041e-05	6.133e-05	5.28729e-05	6.04818e-05	5.63211e-05	4.90904e-05	6.25744e-05	5.80482e-05	5.01281e-05
1464.56	16.846	2.39598e-06	2.07509e-06	1.56909e-06	2.27174e-06	2.00405e-06	1.48465e-06	2.30504e-06	2.00587e-06	1.54098e-06
1481.41	16.846	5.9464e-06	5.5707e-06	5.08276e-06	5.9328e-06	5.55837e-06	5.03683e-06	5.92334e-06	5.54757e-06	5.05127e-06
1498.25	16.849	2.10646e-06	2.11026e-06	2.13837e-06	2.07135e-06	2.0846e-06	2.10641e-06	2.07827e-06	2.07954e-06	2.11853e-06
1515.1	16.844	1.00561e-07	1.07693e-07	1.01381e-07	7.99242e-08	6.82248e-08	7.78492e-08	7.32271e-08	8.58863e-08	8.56056e-08
1531.94	16.848	2.32748e-05	2.33953e-05	2.36505e-05	2.32398e-05	2.33497e-05	2.3549e-05	2.31253e-05	2.32437e-05	2.34755e-05
1548.79	16.848	8.06604e-06	8.03653e-06	8.02026e-06	7.9353e-06	7.93572e-06	7.91117e-06	7.94826e-06	7.93219e-06	7.9226e-06
1565.64	16.846	7.03889e-05	7.04318e-05	7.05108e-05	6.91877e-05	6.92218e-05	6.9305e-05	6.93963e-05	6.94318e-05	6.95061e-05
1582.49	16.845	9.11898e-05	9.11595e-05	9.11066e-05	9.12165e-05	9.11847e-05	9.11457e-05	9.07535e-05	9.07397e-05	9.06841e-05
1599.33	16.848	0.000101975	0.000102036	0.000102208	0.0001039	0.000103977	0.000104139	0.000102605	0.000102676	0.000102847
1616.18	16.846	6.83294e-05	6.83304e-05	6.82803e-05	6.55784e-05	6.55815e-05	6.55485e-05	6.64447e-05	6.64184e-05	6.64057e-05
1633.03	16.846	8.42843e-06	8.43287e-06	8.42193e-06	8.13232e-06	8.14167e-06	8.11071e-06	8.21979e-06	8.22209e-06	8.21827e-06
1649.87	16.848	2.3713e-05	2.37363e-05	2.37479e-05	2.40833e-05	2.40909e-05	2.41176e-05	2.38397e-05	2.38571e-05	2.38718e-05
1666.72	16.845	2.15333e-06	2.15018e-06	2.15697e-06	1.79381e-06	1.79872e-06	1.80356e-06	1.91813e-06	1.92108e-06	1.93118e-06
1683.56	16.849	1.99814e-07	1.79788e-07	1.94721e-07	1.77994e-07	1.68573e-07	1.74142e-07	1.86537e-07	1.70721e-07	1.73888e-07
1700.41	16.845	1.54039e-08	1.93789e-08	1.8353e-08	2.53935e-08	1.25703e-08	1.12332e-08	1.91203e-08	2.36501e-08	2.23219e-08
1717.26	16.846	3.10183e-08	1.3531e-08	2.39437e-08	2.17373e-08	3.17072e-09	1.65102e-08	1.26832e-08	1.19156e-08	2.41222e-08
1734.1	16.849	2.99531e-09	1.33019e-08	8.15615e-09	0	0	0	4.17938e-25	0	-1.8788e-25
1750.95	16.845	1.44406e-07	1.50187e-07	1.44615e-07	1.042e-07	9.96279e-08	9.99053e-08	1.21014e-07	1.207e-07	1.28576e-07
1767.8	16.845	1.54347e-07	1.56182e-07	1.87922e-07	1.05066e-07	1.01452e-07	8.91051e-08	1.00585e-07	1.17357e-07	9.84444e-08
1784.64	16.849	1.55135e-07	1.55169e-07	1.44208e-07	1.0429e-07	1.21421e-07	9.17857e-08	1.24936e-07	1.13727e-07	1.35658e-07
1801.49	16.845	1.00686e-07	9.04037e-08	1.68174e-07	6.68594e-08	5.10649e-08	7.15003e-08	9.21341e-08	9.31568e-08	7.22496e-08
1818.34	16.846	3.59206e-08	6.61046e-10	8.02615e-09	1.49651e-08	0	1.24598e-23	2.72631e-08	6.35309e-08	0
1835.18	16.849	0	0	0	0	0	0	0	0	0
1852.03	16.846	0	0	0	0	0	0	0	0	0
1868.88	16.845	1.20695e-06	6.16323e-07	1.10711e-06	1.08555e-06	4.11015e-07	9.26156e-07	1.06249e-06	5.11095e-07	9.84219e-07
1885.72	16.848	3.79818e-05	3.46991e-05	1.90909e-05	3.8219e-05	3.4589e-05	1.63411e-05	3.79369e-05	3.44204e-05	1.77233e-05
1902.57	16.845	2.30992e-06	2.49692e-06	7.79456e-07	1.97798e-06	2.1294e-06	5.74482e-07	1.98603e-06	2.24507e-06	7.02833e-07
1919.41	16.848	7.41842e-07	6.37536e-07	3.59548e-07	5.1258e-07	4.70485e-07	2.02067e-07	6.10942e-07	5.38018e-07	2.54382e-07
1936.26	16.849	6.57784e-05	9.62964e-05	0.000140009	4.99405e-05	7.11595e-05	0.000105106	5.62464e-05	8.11472e-05	0.000118971
1953.11	16.845	0.00106436	0.00107914	0.00105916	0.00102696	0.0010543	0.00106421	0.00103967	0.00106052	0.00105387
1969.96	16.845	0.000623994	0.000608192	0.000586723	0.000623202	0.000609025	0.000590866	0.000620927	0.000606065	0.000585798
1986.8	16.846	6.56521e-05	6.43509e-05	6.22687e-05	5.75314e-05	5.64142e-05	5.47168e-05	6.06438e-05	5.9459e-05	5.75464e-05
2003.65	16.846	0.00185287	0.00186648	0.00188231	0.00179403	0.00181081	0.00183091	0.00181724	0.00183237	0.0018503
2020.49	16.848	0.00126146	0.00125297	0.00123829	0.00117388	0.00116541	0.001151	0.00120879	0.00120013	0.00118546
2037.34	16.846	0.000313265	0.000312541	0.000311581	0.000294276	0.000293796	0.000293032	0.000300928	0.000300315	0.000299473
2054.19	16.848	0.000812866	0.000812228	0.000810645	0.000830571	0.000830188	0.000829171	0.00081913	0.00081859	0.000817224
2071.03	16.845	0.000718913	0.000718463	0.000717491	0.000699723	0.00069938	0.000698533	0.000705303	0.000704922	0.00070402
2087.88	16.846	0.000266261	0.000266184	0.000266017	0.000233326	0.000233323	0.000233327	0.000246383	0.000246349	0.000246269
2104.73	16.846	4.61104e-05	4.58502e-05	4.54166e-05	4.12259e-05	4.09501e-05	4.05101e-05	4.29268e-05	4.26651e-05	4.22255e-05
2121.57	16.849	1.01475e-05	1.01555e-05	1.0149e-05	8.92294e-06	8.95634e-06	8.95658e-06	9.35558e-06	9.39698e-06	9.39528e-06
2138.42	16.845	2.89199e-06	2.87604e-06	2.88326e-06	2.63916e-06	2.65934e-06	2.64035e-06	2.7159e-06	2.71553e-06	2.73204e-06
2155.27	16.848	1.4591e-05	1.45748e-05	1.45337e-05	1.49458e-05	1.49389e-05	1.4897e-05	1.4727e-05	1.47e-05	1.4678e-05
2172.11	16.846	5.67498e-06	5.69192e-06	5.70479e-06	5.47731e-06	5.47529e-06	5.48784e-06	5.57194e-06	5.55786e-06	5.57429e-06
2188.96	16.846	7.50334e-07	7.80911e-07	7.9355e-07	7.00751e-07	6.90315e-07	6.86976e-07	7.24271e-07	6.94556e-07	7.48728e-07
2205.81	16.845	2.0278e-07	2.00151e-07	2.13321e-07	1.87403e-07	1.66775e-07	1.96171e-07	1.74443e-07	2.03792e-07	2.10647e-07
2222.65	16.85	1.85906e-07	2.16985e-07	1.59109e-07	1.73451e-07	1.757e-07	1.75195e-07	1.682e-07	2.06607e-07	1.85063e-07
2239.5	16.846	5.63238e-08	3.86687e-08	3.63206e-08	3.3043e-08	5.91634e-08	4.03081e-08	3.57204e-08	3.65349e-08	1.767e-08
2256.35	16.845	1.50151e-07	1.75756e-07	1.45216e-07	1.61101e-07	1.68282e-07	1.69946e-07	1.6924e-07	1.48701e-07	1.72806e-07
2273.19	16.846	4.82137e-08	9.1746e-08	6.03817e-08	4.13587e-08	2.67051e-08	4.7691e-08	6.23627e-08	6.31744e-08	6.22682e-08
2290.04	16.848	2.55574e-08	4.99318e-09	3.12277e-08	2.24087e-08	7.03267e-09	2.01346e-08	4.03309e-08	0	5.20048e-08
2306.89	16.845	0	0	0	1.84463e-08	1.17937e-08	1.16445e-08	0	0	2.01145e-08
2323.73	16.848	0	0	0	0	8.51199e-09	0	0	0	0
2340.58	16.846	3.45348e-09	0	0	0	0	0	0	0	0
2357.43	16.848	2.379e-09	0	0	0	0	0	5.78888e-09	0	0
2374.27	16.846	0	3.072e-08	0	0	0	0	0	0	0
2391.12	16.845	0	0	1.34292e-09	0	0	0	0	0	0
2407.96	16.848	0	0	0	9.9043e-09	0	1.60064e-08	1.12972e-08	0	1.10785e-10
2424.81	16.848	0	5.6165e-24	2.03783e-09	1.12455e-08	0	9.47085e-09	0	0	1.88691e-08
2441.66	16.845	1.1952e-08	-6.53608e-27	0	1.81338e-08	0	2.83497e-08	2.04555e-08	1.48058e-08	0
2458.5	16.849	8.52714e-09	3.6693e-08	2.16513e-08	0	2.31649e-09	4.06345e-08	1.72935e-08	3.54295e-08	0
2475.35	16.845	4.16495e-07	3.49663e-07	1.17817e-07	3.08886e-07	1.97273e-07	2.02112e-07	3.0395e-07	2.77746e-07	9.50362e-08
2492.2	16.846	3.62326e-06	3.58837e-06	3.71677e-06	3.00972e-06	2.96314e-06	2.9992e-06	3.17015e-06	3.17681e-06	3.19744e-06
2509.04	16.849	1.47991e-06	1.40559e-06	1.41141e-06	1.28871e-06	1.36508e-06	1.32087e-06	1.45467e-06	1.34467e-06	1.33358e-06

## Sheet: k_GF5B
Wavelength	FWHM	k_Summer_L	k_Summer_M	k_Summer_H	k_Winter_L	k_Winter_M	k_Winter_H	k_1976_L	k_1976_M	k_1976_H
1009	8.546	0	0	0	0	0	0	0	0	0
1017.42	8.546	0	0	0	0	0	0	0	0	0
1025.83	8.546	0	0	0	0	0	0	0	0	0
1034.25	8.546	2.62692e-07	2.61876e-07	2.61352e-07	2.6507e-07	2.64396e-07	2.71287e-07	2.64218e-07	2.62606e-07	2.65008e-07
1042.67	8.546	2.6925e-07	2.59888e-07	2.53334e-07	2.47595e-07	2.6227e-07	2.6454e-07	2.61584e-07	2.61854e-07	2.59663e-07
1051.08	8.546	1.5467e-06	1.54972e-06	1.54505e-06	1.59209e-06	1.59405e-06	1.5855e-06	1.54985e-06	1.55529e-06	1.5517e-06
1059.5	8.546	1.58003e-07	1.46506e-07	1.46662e-07	1.48531e-07	1.30877e-07	1.35911e-07	1.38964e-07	1.45092e-07	1.36885e-07
1067.92	8.546	2.30346e-07	2.26122e-07	2.22729e-07	2.21107e-07	2.23502e-07	2.34885e-07	2.26737e-07	2.20785e-07	2.21622e-07
1076.33	8.546	3.06081e-08	3.19478e-08	3.463e-08	2.8302e-08	2.01739e-08	2.89017e-08	2.96086e-08	2.4296e-08	3.77946e-08
1084.75	8.546	1.18971e-09	1.11719e-09	1.82284e-09	0	0	0	0	1.93429e-09	0
1093.17	8.546	2.35251e-09	2.83539e-09	2.44062e-09	0	2.56973e-09	-2.02312e-09	1.08273e-09	2.86945e-09	0
1101.58	8.546	0	0	0	0	0	0	0	0	0
1110	8.546	7.54983e-10	0	0	0	0	-1.41166e-25	0	0	0
1118.42	8.546	9.73105e-10	0	8.11473e-09	4.73792e-09	0	0	0	0	0
1126.83	8.546	0	0	0	0	0	0	0	0	0
1135.25	8.546	0	0	0	1.18197e-09	0	0	0	0	0
1143.67	8.546	0	0	0	0	0	0	0	0	0
1152.08	8.546	0	0	0	0	0	0	0	0	0
1160.5	8.546	0	0	0	0	0	0	0	0	0
1168.92	8.546	0	0	0	0	0	0	0	0	0
1177.33	8.546	0	0	0	0	0	0	0	2.36007e-09	0
1185.75	8.546	0	0	0	0	0	0	0	0	0
1194.17	8.546	0	0	0	0	0	0	1.22525e-09	0	0
1202.58	8.546	2.60374e-05	2.54445e-05	2.49706e-05	2.64492e-05	2.58486e-05	2.54052e-05	2.6165e-05	2.55645e-05	2.51199e-05
1211	8.546	1.7348e-05	1.70771e-05	1.68168e-05	1.70422e-05	1.6796e-05	1.65384e-05	1.70669e-05	1.6803e-05	1.65504e-05
1219.42	8.546	2.59452e-05	2.61051e-05	2.63357e-05	2.65601e-05	2.67221e-05	2.6992e-05	2.617e-05	2.63414e-05	2.65841e-05
1227.83	8.546	6.47807e-06	6.49321e-06	6.51148e-06	5.9944e-06	6.00768e-06	6.01991e-06	6.15077e-06	6.15586e-06	6.15745e-06
1236.25	8.546	1.15244e-06	1.15286e-06	1.15095e-06	1.09369e-06	1.09952e-06	1.09865e-06	1.12947e-06	1.12588e-06	1.12477e-06
1244.67	8.546	1.07983e-07	9.46115e-08	1.03073e-07	9.46989e-08	9.0394e-08	8.60757e-08	8.7792e-08	9.65313e-08	9.12309e-08
1253.08	8.546	2.26859e-07	2.23222e-07	2.2977e-07	2.23805e-07	2.3679e-07	2.26978e-07	2.35207e-07	2.21958e-07	2.20086e-07
1261.5	8.546	2.60805e-07	2.51016e-07	2.54939e-07	2.49309e-07	2.48633e-07	2.67069e-07	2.55293e-07	2.5624e-07	2.39659e-07
1269.92	8.546	6.50795e-08	7.40456e-08	6.48642e-08	7.41996e-08	6.759e-08	7.35523e-08	7.03315e-08	6.07382e-08	5.64823e-08
1278.33	8.546	0	0	0	0	4.36234e-09	0	0	0	0
1286.75	8.546	7.99542e-07	7.88369e-07	7.90158e-07	7.46241e-07	7.41232e-07	7.5166e-07	7.58485e-07	7.48052e-07	7.44398e-07
1295.17	8.546	1.82626e-06	1.82313e-06	1.83789e-06	1.87293e-06	1.87636e-06	1.88386e-06	1.84906e-06	1.84706e-06	1.85542e-06
1303.58	8.546	2.95295e-08	3.08112e-08	3.56754e-08	3.281e-08	1.72953e-08	1.62807e-08	2.78294e-08	1.75614e-08	3.57648e-08
1312	8.546	4.17256e-06	4.07665e-06	3.90224e-06	4.18861e-06	4.09948e-06	3.93647e-06	4.16659e-06	4.06835e-06	3.90529e-06
1320.42	8.546	5.28514e-06	5.30886e-06	5.35493e-06	5.30056e-06	5.34999e-06	5.3918e-06	5.25705e-06	5.30065e-06	5.33867e-06
1328.83	8.546	9.41488e-08	1.25735e-07	8.83596e-08	5.66002e-08	6.2062e-08	6.94214e-08	7.03851e-08	9.25764e-08	8.45345e-08
1337.25	8.546	2.69398e-06	2.62786e-06	2.49411e-06	2.71412e-06	2.66895e-06	2.52742e-06	2.68577e-06	2.62162e-06	2.49777e-06
1345.66	8.546	2.1321e-06	2.42635e-06	2.86777e-06	2.07938e-06	2.44121e-06	2.86043e-06	2.08923e-06	2.4175e-06	2.81252e-06
1354.08	8.546	1.76041e-07	7.54059e-08	7.44901e-08	1.28225e-07	1.82934e-07	1.55897e-07	1.61292e-07	2.14951e-07	7.6377e-08
1362.5	8.546	9.61685e-09	7.61738e-08	0	1.12528e-07	1.61796e-08	5.99762e-09	1.12114e-08	8.94777e-09	1.43933e-08
1370.91	8.546	3.54218e-07	2.02012e-07	9.13623e-08	2.70967e-07	1.69615e-07	8.60303e-08	3.46883e-07	2.29021e-07	5.84896e-08
1379.33	8.546	1.63246e-07	1.74622e-07	6.67316e-08	1.78471e-07	1.87957e-07	3.85731e-08	1.81994e-07	1.76228e-07	4.90633e-08
1387.75	8.546	1.55543e-08	2.06874e-09	1.35134e-09	0	0	0	3.27925e-08	2.29395e-09	-2.97484e-09
1396.16	8.546	0	0	0	1.47776e-09	0	0	0	0	0
1404.58	8.546	0	0	0	1.983e-08	0	0	0	0	8.20591e-09
1413	8.546	0	0	-2.69327e-09	0	0	0	0	0	0
1421.41	8.546	2.26717e-08	4.50427e-08	1.07473e-08	1.06731e-08	2.35051e-08	2.566e-08	1.25284e-08	2.96058e-08	1.87654e-08
1429.83	8.546	0.000145	0.000116273	8.90185e-05	0.000149661	0.000121622	9.30894e-05	0.000147452	0.000119119	9.08225e-05
1438.25	8.546	0.000266454	0.000266771	0.000249328	0.000266171	0.000266738	0.00025321	0.000264824	0.000265097	0.000248675
1446.66	8.546	7.20655e-05	7.13118e-05	6.71514e-05	6.28288e-05	6.2612e-05	5.93939e-05	6.6398e-05	6.59153e-05	6.2174e-05
1455.08	8.546	3.61343e-06	3.28599e-06	2.90432e-06	2.52862e-06	2.30825e-06	2.0133e-06	2.86465e-06	2.613e-06	2.31055e-06
1463.5	8.546	1.86979e-07	1.77711e-07	1.51706e-07	1.04826e-07	1.44731e-07	1.0143e-07	1.22824e-07	1.1423e-07	1.2653e-07
1471.91	8.546	1.05076e-05	9.66107e-06	8.03185e-06	1.07139e-05	9.91395e-06	8.27298e-06	1.05625e-05	9.7869e-06	8.16295e-06
1480.33	8.546	7.9502e-06	7.75701e-06	7.56671e-06	7.88631e-06	7.68078e-06	7.45656e-06	7.88195e-06	7.66835e-06	7.49341e-06
1488.75	8.546	1.07853e-06	1.01528e-06	9.66724e-07	9.16199e-07	8.87196e-07	8.42452e-07	9.92313e-07	9.47483e-07	9.02762e-07
1497.16	8.546	3.52157e-06	3.56489e-06	3.65009e-06	3.51202e-06	3.55443e-06	3.62424e-06	3.50584e-06	3.53925e-06	3.61517e-06
1505.58	8.546	1.3832e-07	1.32241e-07	1.28118e-07	1.17615e-07	1.21377e-07	1.28628e-07	1.23418e-07	1.15147e-07	1.43569e-07
1514	8.546	1.42158e-08	3.65327e-08	2.16771e-08	2.03553e-08	1.42736e-08	7.73975e-09	6.06364e-09	1.91911e-08	2.00726e-08
1522.41	8.546	1.57636e-06	1.57194e-06	1.56371e-06	1.28895e-06	1.28389e-06	1.28322e-06	1.379e-06	1.3985e-06	1.39006e-06
1530.83	8.546	2.24439e-05	2.25601e-05	2.28246e-05	2.1727e-05	2.18231e-05	2.20335e-05	2.19322e-05	2.2045e-05	2.22766e-05
1539.25	8.546	3.42971e-05	3.42794e-05	3.42495e-05	3.55215e-05	3.55225e-05	3.54907e-05	3.48151e-05	3.48e-05	3.47794e-05
1547.66	8.546	3.74692e-06	3.71697e-06	3.71499e-06	3.39526e-06	3.39465e-06	3.37745e-06	3.51283e-06	3.49934e-06	3.49689e-06
1556.08	8.546	3.30171e-07	3.22749e-07	3.36498e-07	3.2052e-07	3.14875e-07	3.11108e-07	3.10586e-07	3.18332e-07	3.24388e-07
1564.5	8.546	7.86711e-06	7.8797e-06	7.88725e-06	6.44028e-06	6.45338e-06	6.47087e-06	7.01962e-06	7.02008e-06	7.02863e-06
1572.91	8.546	0.000209573	0.000209603	0.000209612	0.000212452	0.000212453	0.000212492	0.000210161	0.000210177	0.000210201
1581.33	8.546	0.000124213	0.000124138	0.00012402	0.000123673	0.000123612	0.000123505	0.000123304	0.000123246	0.000123121
1589.75	8.546	4.52846e-06	4.5248e-06	4.50398e-06	3.67285e-06	3.65902e-06	3.65294e-06	3.99412e-06	4.00619e-06	3.99193e-06
1598.16	8.546	8.9067e-05	8.91263e-05	8.9302e-05	8.74242e-05	8.74973e-05	8.76486e-05	8.77523e-05	8.78154e-05	8.79793e-05
1606.58	8.546	0.000179275	0.000179254	0.000179181	0.000186266	0.000186258	0.000186198	0.000182356	0.000182314	0.00018227
1615	8.546	7.2233e-05	7.22432e-05	7.22413e-05	6.76057e-05	6.76318e-05	6.7637e-05	6.92639e-05	6.92445e-05	6.92902e-05
1623.41	8.546	6.24111e-06	6.25414e-06	6.25183e-06	4.88872e-06	4.8956e-06	4.89468e-06	5.46349e-06	5.46969e-06	5.46636e-06
1631.83	8.546	4.09963e-06	4.11929e-06	4.1178e-06	4.0957e-06	4.10957e-06	4.09299e-06	4.07112e-06	4.08216e-06	4.08944e-06
1640.25	8.546	2.9826e-05	2.98385e-05	2.9807e-05	2.98936e-05	2.98944e-05	2.98745e-05	2.97267e-05	2.97324e-05	2.97183e-05
1648.66	8.546	2.83648e-05	2.83751e-05	2.8398e-05	2.92579e-05	2.92735e-05	2.9283e-05	2.87715e-05	2.87729e-05	2.87829e-05
1657.08	8.546	6.52177e-06	6.52953e-06	6.49168e-06	5.71486e-06	5.70943e-06	5.70974e-06	6.00576e-06	6.02292e-06	6.01478e-06
1665.5	8.546	2.7902e-06	2.78873e-06	2.79636e-06	2.26893e-06	2.26706e-06	2.28039e-06	2.48549e-06	2.4941e-06	2.49392e-06
1673.91	8.546	7.24947e-07	7.15825e-07	7.27764e-07	6.12984e-07	6.31457e-07	6.2663e-07	6.57398e-07	6.64034e-07	6.81555e-07
1682.33	8.546	2.16174e-07	1.86631e-07	2.01691e-07	1.83229e-07	1.83401e-07	1.77649e-07	1.91782e-07	1.82857e-07	1.84933e-07
1690.75	8.546	4.97311e-08	5.42453e-08	5.76036e-08	5.96082e-08	3.35431e-08	5.73619e-08	7.12749e-08	4.0735e-08	3.78551e-08
1699.16	8.546	1.30726e-08	1.17029e-08	1.21594e-08	3.01419e-08	1.3002e-08	2.86893e-09	1.86474e-08	1.04204e-08	2.0778e-08
1707.58	8.546	2.91921e-08	1.66483e-08	3.23487e-08	1.84865e-08	1.96576e-08	1.66833e-08	2.07505e-08	5.14368e-08	4.41012e-08
1716	8.546	2.71172e-08	1.31613e-08	2.05716e-08	9.78508e-09	1.73706e-24	1.45081e-08	1.15475e-08	2.55244e-09	7.63579e-09
1724.41	8.546	2.92026e-08	1.54212e-08	2.71613e-08	2.4243e-08	0	1.0607e-08	8.11274e-09	0	1.04371e-08
1732.83	8.546	0	7.87634e-09	0	0	0	0	1.83614e-24	0	0
1741.25	8.546	0	9.32271e-09	7.4533e-09	0	0	0	0	0	0
1749.66	8.546	5.25374e-08	5.6007e-08	5.63794e-08	3.35306e-08	3.6521e-08	3.88075e-08	4.15384e-08	4.56973e-08	4.72551e-08
1758.08	8.546	3.07396e-07	3.20286e-07	3.22206e-07	2.22721e-07	2.1646e-07	2.10484e-07	2.55653e-07	2.66273e-07	2.74979e-07
1766.5	8.546	1.81884e-07	1.79322e-07	2.20656e-07	1.14708e-07	1.10359e-07	1.02671e-07	1.19465e-07	1.24006e-07	1.10804e-07
1774.91	8.546	3.26367e-08	3.228e-08	5.31643e-08	3.09583e-08	2.64991e-08	4.14727e-09	2.51879e-09	1.32851e-08	2.10704e-08
1783.33	8.546	1.28033e-07	1.37429e-07	9.49917e-08	8.97789e-08	9.04718e-08	7.62619e-08	1.03938e-07	9.58079e-08	1.17193e-07
1791.75	8.546	2.23791e-07	1.88814e-07	2.79204e-07	1.41526e-07	1.5221e-07	1.45844e-07	1.77714e-07	1.46738e-07	1.56296e-07
1800.16	8.546	1.03734e-07	1.00642e-07	1.53817e-07	7.47292e-08	2.58629e-08	5.28905e-08	9.22247e-08	8.61333e-08	6.49e-08
1808.58	8.546	2.70401e-08	3.6926e-08	1.13405e-07	1.00609e-08	7.04173e-08	5.16443e-10	2.13701e-08	5.5762e-08	1.23013e-08
1817	8.546	5.68626e-08	0	6.42136e-09	3.08164e-08	0	0	4.94154e-08	1.00492e-07	0
1825.41	8.546	0	1.82148e-09	1.95071e-08	0	0	0	0	0	0
1833.83	8.546	0	0	0	0	0	0	0	0	0
1842.25	8.546	0	0	0	0	0	0	0	0	0
1850.66	8.546	0	0	0	0	0	0	0	0	0
1859.08	8.546	0	0	0	5.48685e-08	5.85651e-09	9.59963e-10	0	0	0
1867.5	8.546	4.87687e-08	3.00487e-08	1.37624e-07	2.51917e-07	2.05644e-08	1.41811e-07	2.79313e-08	2.5185e-08	7.23847e-08
1875.91	8.546	2.32152e-05	1.964e-05	8.93612e-06	2.39299e-05	2.04978e-05	7.05894e-06	2.36217e-05	1.99417e-05	8.19057e-06
1884.33	8.546	4.88137e-05	4.32718e-05	2.50979e-05	4.87468e-05	4.26934e-05	2.15153e-05	4.85898e-05	4.27561e-05	2.33078e-05
1892.75	8.546	6.70258e-06	5.29456e-06	2.96683e-06	6.05267e-06	4.85232e-06	2.24973e-06	6.29255e-06	4.95289e-06	2.58852e-06
1901.16	8.546	1.59992e-06	1.31775e-06	3.06123e-07	1.35928e-06	1.05261e-06	2.52752e-07	1.30926e-06	1.10349e-06	2.39458e-07
1909.58	8.546	1.44092e-06	1.10382e-06	2.61875e-07	1.16223e-06	9.78419e-07	1.91376e-07	1.10874e-06	1.00588e-06	3.67004e-07
1918	8.546	7.10096e-07	5.85104e-07	3.39372e-07	5.14355e-07	3.94688e-07	1.66424e-07	5.4366e-07	5.15037e-07	2.30458e-07
1926.41	8.546	6.47663e-07	5.91293e-07	3.54904e-07	4.56317e-07	4.59216e-07	1.96503e-07	5.29287e-07	4.92255e-07	2.48431e-07
1934.83	8.546	8.44351e-06	7.71271e-06	6.11772e-06	5.67318e-06	5.35065e-06	4.72186e-06	6.65133e-06	6.12317e-06	5.07195e-06
1943.25	8.546	0.000298439	0.000319557	0.000327708	0.000250431	0.000268693	0.000281329	0.00026999	0.000289178	0.000299085
1951.66	8.546	0.00108189	0.00109022	0.00107007	0.00103719	0.0010588	0.00107125	0.00105297	0.00106781	0.00106271
1960.08	8.546	0.00119071	0.00114275	0.00107583	0.00120793	0.00116221	0.00110039	0.00119321	0.00114621	0.00107951
1968.5	8.546	0.000876791	0.000872071	0.000862752	0.000888561	0.000885759	0.000879272	0.000878843	0.000875016	0.000866653
1976.91	8.546	0.000220918	0.00022409	0.000223417	0.000206842	0.000210706	0.000211734	0.000212315	0.000215837	0.000216088
1985.33	8.546	4.32107e-05	4.30398e-05	4.26728e-05	3.78081e-05	3.75986e-05	3.72709e-05	3.98475e-05	3.96745e-05	3.92717e-05
1993.75	8.546	0.000200613	0.000198184	0.000195576	0.000184808	0.000182843	0.000180919	0.000190957	0.00018882	0.000186559
2002.16	8.546	0.00251754	0.00250207	0.00247967	0.00246395	0.00244872	0.00242723	0.00248049	0.00246501	0.00244287
2010.58	8.546	0.00276594	0.00275089	0.0027284	0.00280978	0.00279577	0.00277499	0.00277861	0.00276412	0.0027422
2019	8.546	0.00181367	0.00181229	0.00180548	0.00174877	0.00174623	0.00173881	0.00177073	0.00176857	0.00176141
2027.41	8.546	0.000576651	0.000579741	0.000583971	0.000500647	0.000502994	0.000506085	0.00053157	0.000534211	0.000537857
2035.83	8.546	0.000291091	0.000289885	0.000288288	0.000269816	0.000268874	0.000267443	0.000277376	0.00027628	0.000274744
2044.25	8.546	0.0003742	0.000375602	0.000378312	0.000367237	0.000368228	0.000370162	0.000368659	0.000369847	0.000372192
2052.66	8.546	0.00103605	0.00103505	0.00103317	0.00105649	0.00105546	0.0010536	0.00104279	0.00104174	0.00103988
2061.08	8.546	0.00071642	0.000717223	0.000718261	0.000751963	0.000753253	0.000755252	0.000732337	0.000733338	0.000734732
2069.49	8.546	0.000787901	0.000787852	0.000787718	0.000772275	0.000772095	0.000771744	0.000775472	0.000775384	0.000775188
2077.91	8.546	0.000452257	0.000450473	0.000447363	0.000415156	0.00041347	0.000410435	0.000430019	0.000428286	0.000425246
2086.33	8.546	0.000328491	0.000328356	0.000328073	0.000289123	0.000289055	0.000288925	0.000304809	0.000304704	0.000304524
2094.74	8.546	0.000139032	0.00013924	0.00013947	0.000117648	0.000117758	0.000117939	0.000126037	0.000126201	0.000126365
2103.16	8.546	4.77153e-05	4.73382e-05	4.67437e-05	4.23902e-05	4.20136e-05	4.14144e-05	4.42588e-05	4.39242e-05	4.32928e-05
2111.58	8.546	3.00877e-05	3.00079e-05	2.98047e-05	2.86329e-05	2.85255e-05	2.83045e-05	2.89706e-05	2.88568e-05	2.86995e-05
2119.99	8.546	1.11472e-05	1.11073e-05	1.10084e-05	9.73003e-06	9.69791e-06	9.63254e-06	1.01331e-05	1.01476e-05	1.00454e-05
2128.41	8.546	2.77288e-06	2.76397e-06	2.77407e-06	2.16641e-06	2.18961e-06	2.17321e-06	2.55078e-06	2.5613e-06	2.56984e-06
2136.83	8.546	1.96002e-06	1.94144e-06	1.93074e-06	1.64576e-06	1.68414e-06	1.66259e-06	1.73597e-06	1.73463e-06	1.75185e-06
2145.24	8.546	9.62273e-06	9.58174e-06	9.56216e-06	9.33434e-06	9.30072e-06	9.26627e-06	9.39662e-06	9.358e-06	9.34176e-06
2153.66	8.546	1.29023e-05	1.28847e-05	1.27925e-05	1.35365e-05	1.35005e-05	1.34016e-05	1.32025e-05	1.31597e-05	1.30746e-05
2162.08	8.546	1.38964e-05	1.3861e-05	1.38472e-05	1.39062e-05	1.39275e-05	1.39061e-05	1.38494e-05	1.38204e-05	1.38213e-05
2170.49	8.546	6.5681e-06	6.59285e-06	6.6299e-06	6.32634e-06	6.33117e-06	6.3468e-06	6.42625e-06	6.43521e-06	6.44718e-06
2178.91	8.546	1.36405e-06	1.38185e-06	1.3548e-06	1.26032e-06	1.26908e-06	1.25997e-06	1.32831e-06	1.31886e-06	1.35034e-06
2187.33	8.546	9.37726e-07	9.64578e-07	9.9257e-07	9.09943e-07	8.92088e-07	9.16321e-07	9.19811e-07	9.07277e-07	9.52514e-07
2195.74	8.546	4.47216e-07	5.12422e-07	4.96282e-07	3.79743e-07	4.15825e-07	3.75449e-07	4.32675e-07	3.89978e-07	4.56906e-07
2204.16	8.546	7.77301e-08	7.33024e-08	1.04286e-07	7.46803e-08	2.54097e-08	7.88422e-08	5.74361e-08	8.04043e-08	9.65851e-08
2212.58	8.546	3.51251e-07	3.27156e-07	3.32728e-07	3.3079e-07	3.20568e-07	3.15831e-07	2.88735e-07	3.5461e-07	3.18815e-07
2220.99	8.546	2.13848e-07	2.16756e-07	1.38139e-07	1.95113e-07	1.92165e-07	1.61004e-07	1.57993e-07	2.23576e-07	2.34313e-07
2229.41	8.546	1.05423e-07	1.80475e-07	1.43356e-07	1.00743e-07	1.23248e-07	1.28262e-07	1.51994e-07	1.27747e-07	7.94093e-08
2237.83	8.546	5.9969e-08	1.59306e-08	1.7818e-08	8.43438e-09	4.90722e-08	2.54669e-08	4.3004e-08	1.72281e-08	2.4827e-08
2246.24	8.546	9.33743e-08	6.40193e-08	8.69887e-08	7.75082e-08	9.28392e-08	7.16088e-08	6.24059e-08	7.87934e-08	4.87732e-08
2254.66	8.546	1.87288e-07	2.02936e-07	1.86415e-07	2.03975e-07	2.39779e-07	2.04623e-07	2.12262e-07	1.95387e-07	2.27103e-07
2263.08	8.546	4.425e-08	1.12015e-07	6.74744e-08	8.51454e-08	5.40939e-08	1.10636e-07	7.69464e-08	5.08534e-08	8.21194e-08
2271.49	8.546	6.32956e-08	6.9984e-08	4.80068e-08	3.58121e-08	2.08136e-08	4.95221e-08	8.34573e-08	2.64953e-08	5.77978e-08
2279.91	8.546	3.46026e-08	9.84563e-08	6.43404e-08	6.37097e-08	2.99022e-08	3.62895e-08	3.68278e-08	9.51012e-08	9.23654e-08
2288.33	8.546	1.62115e-08	1.01887e-08	3.12245e-08	1.75695e-08	0	3.80405e-08	5.91755e-08	0	5.08357e-08
2296.74	8.546	1.86637e-08	0	2.78615e-08	1.13962e-08	9.30416e-09	0	8.17361e-09	0	2.32128e-08
2305.16	8.546	0	0	0	3.18622e-08	0	2.40678e-08	0	0	1.60448e-08
2313.58	8.546	0	0	0	0	2.6508e-08	0	0	0	2.70555e-08
2321.99	8.546	0	0	0	0	1.24741e-08	0	0	0	0
2330.41	8.546	0	0	0	0	0	0	0	0	0
2338.83	8.546	0	0	0	0	0	0	0	0	0
2347.24	8.546	1.24646e-08	0	0	0	0	0	0	0	0
2355.66	8.546	0	0	0	0	0	0	8.53023e-09	0	0
2364.08	8.546	0	0	0	0	0	0	0	0	0
2372.49	8.546	0	5.69178e-08	0	0	0	0	0	0	0
2380.91	8.546	0	0	0	0	0	0	0	0	0
2389.33	8.546	0	0	0	0	0	0	0	0	0
2397.74	8.546	0	0	2.78194e-09	0	0	0	0	0	0
2406.16	8.546	0	0	0	1.26503e-08	0	3.16681e-08	2.02331e-08	0	0
2414.58	8.546	0	0	0	1.32557e-08	0	0	0	0	5.06074e-10
2422.99	8.546	0	1.24737e-23	3.01298e-09	1.88847e-08	0	0	0	0	0
2431.41	8.546	0	0	0	0	0	1.54172e-08	0	6.53841e-10	4.81199e-08
2439.83	8.546	2.08676e-08	0	0	0	0	2.2619e-08	2.22028e-08	9.54836e-10	0
2448.24	8.546	0	7.08825e-26	0	2.97155e-08	0	5.02382e-08	2.91478e-08	6.17592e-08	0
2456.66	8.546	0	4.14597e-08	0	0	0	4.54446e-08	3.20628e-08	5.78731e-08	0
2465.08	8.546	4.23832e-08	8.29374e-08	7.20989e-08	0	2.20188e-08	4.69311e-08	2.14185e-08	0	0
2473.49	8.546	9.35308e-08	1.46348e-07	5.18553e-09	1.21506e-07	6.30542e-08	1.89818e-07	6.62034e-08	1.46415e-07	1.08693e-08
2481.91	8.546	3.00363e-06	2.76109e-06	2.33561e-06	2.17531e-06	1.94219e-06	1.61122e-06	2.42564e-06	2.30227e-06	1.88226e-06
2490.33	8.546	4.1212e-06	4.33492e-06	4.79795e-06	3.40069e-06	3.50159e-06	3.73615e-06	3.67629e-06	3.8704e-06	4.18654e-06
2498.74	8.546	2.02857e-06	1.9439e-06	2.07648e-06	1.89388e-06	1.89262e-06	1.88827e-06	1.79768e-06	1.82584e-06	1.84408e-06
2507.16	8.546	1.14084e-06	1.07137e-06	1.01917e-06	9.89643e-07	1.09046e-06	9.23127e-07	1.21351e-06	9.76692e-07	9.37419e-07
2515.58	8.546	1.88398e-06	2.11489e-06	2.13408e-06	1.59987e-06	1.59496e-06	1.86386e-06	1.73533e-06	2.00698e-06	1.98773e-06

## Sheet: k_GF5A
Wavelength	FWHM	k_Summer_L	k_Summer_M	k_Summer_H	k_Winter_L	k_Winter_M	k_Winter_H	k_1976_L	k_1976_M	k_1976_H
1014.15	8.25	0	0	0	0	0	0	0	0	0
1022.56	8.25	0	0	0	0	0	0	0	0	0
1030.98	8.25	0	0	0	0	0	0	0	0	0
1039.4	8.25	6.17789e-07	6.1025e-07	6.08426e-07	6.1356e-07	6.24322e-07	6.31438e-07	6.14579e-07	6.20013e-07	6.16408e-07
1047.81	8.25	9.5977e-07	9.55953e-07	9.56834e-07	9.88363e-07	9.93802e-07	9.87176e-07	9.58805e-07	9.55295e-07	9.58035e-07
1056.23	8.25	5.09898e-07	5.13898e-07	5.01186e-07	4.93144e-07	4.83187e-07	4.85839e-07	4.97522e-07	4.94659e-07	4.93021e-07
1064.65	8.25	3.19539e-07	3.03832e-07	3.07492e-07	3.22513e-07	3.13411e-07	3.18416e-07	3.11466e-07	3.19335e-07	3.04856e-07
1073.06	8.25	4.59745e-08	5.40778e-08	5.63642e-08	3.02983e-08	3.39095e-08	4.7958e-08	5.0023e-08	3.48178e-08	4.13349e-08
1081.48	8.25	6.89209e-09	5.91252e-09	6.15989e-09	1.03388e-08	7.99833e-10	4.60005e-09	1.72825e-09	1.01546e-08	1.16713e-08
1089.9	8.25	1.61933e-09	0	2.04699e-09	0	0	-1.80412e-09	1.32678e-09	0	0
1098.31	8.25	0	2.6179e-09	0	0	2.25883e-09	0	0	1.87434e-09	0
1106.73	8.25	0	0	0	0	0	0	0	0	0
1115.15	8.25	1.7244e-09	0	5.3113e-09	2.76341e-09	0	1.86997e-24	0	0	0
1123.56	8.25	0	0	0	0	0	0	0	0	0
1131.98	8.25	0	0	0	2.12841e-09	0	0	0	0	0
1140.4	8.25	0	0	0	0	0	0	0	0	0
1148.81	8.25	0	0	0	0	0	0	0	0	0
1157.23	8.25	0	0	0	0	0	0	0	0	0
1165.65	8.25	0	0	0	0	0	0	0	0	0
1174.06	8.25	0	0	0	0	0	0	0	3.83822e-09	0
1182.48	8.25	0	0	0	0	0	0	0	0	0
1190.9	8.25	0	0	0	0	0	0	1.57852e-09	0	0
1199.31	8.25	1.84135e-06	1.84244e-06	1.83198e-06	1.71385e-06	1.72388e-06	1.71906e-06	1.76332e-06	1.7636e-06	1.76302e-06
1207.73	8.25	3.84731e-05	3.77878e-05	3.70422e-05	3.904e-05	3.83511e-05	3.75921e-05	3.85904e-05	3.79027e-05	3.71533e-05
1216.15	8.25	1.47302e-05	1.48714e-05	1.50985e-05	1.46259e-05	1.47666e-05	1.50225e-05	1.46143e-05	1.47574e-05	1.50044e-05
1224.56	8.25	1.57682e-05	1.5889e-05	1.60702e-05	1.58357e-05	1.59414e-05	1.61186e-05	1.57163e-05	1.58211e-05	1.59884e-05
1232.98	8.25	1.71872e-06	1.71955e-06	1.71411e-06	1.52072e-06	1.53397e-06	1.52664e-06	1.60977e-06	1.60898e-06	1.60651e-06
1241.4	8.25	4.05538e-07	3.93334e-07	3.98932e-07	3.78116e-07	3.7498e-07	3.77407e-07	3.78836e-07	3.85374e-07	3.80506e-07
1249.81	8.25	1.50343e-07	1.54833e-07	1.49616e-07	1.59751e-07	1.55779e-07	1.50142e-07	1.55204e-07	1.52892e-07	1.52647e-07
1258.23	8.25	2.09651e-07	1.92106e-07	2.07076e-07	1.88438e-07	1.98471e-07	2.11509e-07	2.06984e-07	2.00071e-07	1.84769e-07
1266.65	8.25	2.06844e-07	2.2285e-07	2.13306e-07	2.30433e-07	2.19091e-07	2.21433e-07	2.24325e-07	2.06469e-07	1.99712e-07
1275.06	8.25	2.43237e-09	0	0	0	0	2.67358e-09	0	0	0
1283.48	8.25	8.6458e-08	7.58509e-08	7.82884e-08	6.74873e-08	5.84187e-08	7.33871e-08	6.88429e-08	5.91656e-08	5.91334e-08
1291.9	8.25	2.37437e-06	2.37724e-06	2.38931e-06	2.40771e-06	2.41323e-06	2.41745e-06	2.37193e-06	2.37589e-06	2.39115e-06
1300.31	8.25	3.1026e-07	3.10071e-07	3.29994e-07	3.08665e-07	2.93978e-07	2.93602e-07	3.12001e-07	2.9857e-07	3.20863e-07
1308.73	8.25	1.90159e-07	1.99096e-07	1.66571e-07	1.80265e-07	1.69535e-07	1.63051e-07	1.92015e-07	1.79441e-07	1.64782e-07
1317.15	8.25	8.56618e-06	8.572e-06	8.55137e-06	8.77736e-06	8.81143e-06	8.80384e-06	8.63864e-06	8.6768e-06	8.65091e-06
1325.56	8.25	8.54377e-07	8.86633e-07	8.69634e-07	7.42725e-07	7.71466e-07	7.91818e-07	7.71219e-07	8.08967e-07	8.10291e-07
1333.98	8.25	1.20735e-06	1.19604e-06	1.18013e-06	1.16436e-06	1.14657e-06	1.13356e-06	1.17616e-06	1.16405e-06	1.15376e-06
1342.4	8.25	3.04967e-06	3.15498e-06	3.23368e-06	3.12233e-06	3.2943e-06	3.36361e-06	3.07713e-06	3.20949e-06	3.2618e-06
1350.81	8.25	3.28834e-07	2.39648e-07	3.35951e-07	2.52337e-07	3.3166e-07	3.36791e-07	2.91312e-07	3.469e-07	4.37137e-07
1359.23	8.25	7.76937e-09	4.85473e-08	0	5.43243e-08	1.09429e-08	6.21343e-09	3.13745e-08	5.75857e-08	0
1367.65	8.25	1.83636e-07	1.05113e-07	4.05125e-08	1.92894e-07	6.91711e-08	4.59132e-08	2.23934e-07	1.17791e-07	3.74808e-08
1376.06	8.25	2.51182e-07	2.18686e-07	1.10556e-07	2.41926e-07	2.26491e-07	7.28145e-08	2.45984e-07	2.14146e-07	7.58757e-08
1384.48	8.25	2.58476e-08	7.75174e-09	2.80861e-09	0	9.11584e-09	0	5.88185e-08	1.1006e-08	-8.5537e-09
1392.9	8.25	1.56545e-10	0	0	9.58647e-10	0	0	0	0	0
1401.31	8.25	0	0	0	2.62669e-08	0	0	0	0	7.61247e-09
1409.73	8.25	0	0	-4.68589e-09	0	0	0	0	0	0
1418.15	8.25	3.16899e-09	1.72913e-08	0	8.70465e-09	0	1.63954e-08	6.47884e-09	0	7.20914e-10
1426.56	8.25	8.14683e-06	1.16565e-05	1.50343e-05	7.60343e-06	1.07922e-05	1.37087e-05	7.7795e-06	1.11004e-05	1.42118e-05
1434.98	8.25	0.000332378	0.000308942	0.000268976	0.00034615	0.000323056	0.000285253	0.000338338	0.000314952	0.000275112
1443.4	8.25	0.000143263	0.000143936	0.000143992	0.000132838	0.000133787	0.000135864	0.000136604	0.000137341	0.000138063
1451.81	8.25	1.43315e-05	1.4537e-05	1.45795e-05	1.11325e-05	1.13593e-05	1.14541e-05	1.22777e-05	1.24842e-05	1.25345e-05
1460.23	8.25	5.97179e-07	5.9215e-07	5.6147e-07	3.86384e-07	4.38459e-07	3.92845e-07	4.59608e-07	4.86277e-07	4.96596e-07
1468.65	8.25	4.7854e-06	4.48396e-06	3.73679e-06	4.7529e-06	4.54078e-06	3.82524e-06	4.73429e-06	4.46245e-06	3.79754e-06
1477.06	8.25	1.04148e-05	9.88922e-06	9.12296e-06	1.07106e-05	1.01978e-05	9.46103e-06	1.05292e-05	1.00466e-05	9.29163e-06
1485.48	8.25	1.98067e-06	1.95633e-06	1.93951e-06	1.76382e-06	1.75665e-06	1.71799e-06	1.86808e-06	1.8246e-06	1.81198e-06
1493.9	8.25	3.11399e-06	3.21467e-06	3.40578e-06	3.08266e-06	3.18463e-06	3.3578e-06	3.0963e-06	3.18415e-06	3.38108e-06
1502.31	8.25	6.61507e-07	6.44237e-07	6.51327e-07	6.05318e-07	6.02289e-07	6.00093e-07	6.15858e-07	6.06176e-07	6.21172e-07
1510.73	8.25	1.32537e-08	2.20629e-08	1.92303e-08	1.93484e-08	1.07429e-08	1.04349e-08	1.57912e-08	2.39005e-08	2.75016e-08
1519.15	8.25	1.56305e-07	1.5705e-07	1.45654e-07	1.16216e-07	9.6436e-08	1.17513e-07	1.04832e-07	1.15701e-07	1.11414e-07
1527.56	8.25	7.27533e-06	7.2694e-06	7.3084e-06	6.51643e-06	6.53148e-06	6.5342e-06	6.7785e-06	6.79128e-06	6.80942e-06
1535.98	8.25	3.81782e-05	3.81729e-05	3.8169e-05	3.89979e-05	3.89857e-05	3.89549e-05	3.84421e-05	3.84324e-05	3.84261e-05
1544.4	8.25	1.76869e-05	1.7663e-05	1.76751e-05	1.74969e-05	1.75148e-05	1.75167e-05	1.74971e-05	1.74852e-05	1.75059e-05
1552.81	8.25	3.18253e-07	3.07195e-07	3.13602e-07	2.7557e-07	2.7953e-07	2.69106e-07	2.86134e-07	2.86706e-07	2.94603e-07
1561.23	8.25	4.46427e-07	4.45406e-07	4.53158e-07	4.14073e-07	4.2828e-07	4.28401e-07	4.39968e-07	4.31907e-07	4.31485e-07
1569.65	8.25	0.000151025	0.000151085	0.000151179	0.000148034	0.000148066	0.000148189	0.000148605	0.000148663	0.000148762
1578.06	8.25	0.000163788	0.000163743	0.000163682	0.000167528	0.000167478	0.000167415	0.000165079	0.000165045	0.000164966
1586.48	8.25	2.3799e-05	2.37745e-05	2.37081e-05	2.14283e-05	2.1398e-05	2.13558e-05	2.23112e-05	2.23072e-05	2.22474e-05
1594.9	8.25	1.27091e-05	1.27048e-05	1.27373e-05	1.13083e-05	1.1307e-05	1.13179e-05	1.18272e-05	1.18357e-05	1.18595e-05
1603.31	8.25	0.000195155	0.00019515	0.000195173	0.000202157	0.000202181	0.000202203	0.000198208	0.000198214	0.000198241
1611.73	8.25	0.000140823	0.000140809	0.000140743	0.000139672	0.000139669	0.000139619	0.000139529	0.000139479	0.00013946
1620.15	8.25	1.65127e-05	1.65321e-05	1.64936e-05	1.33589e-05	1.3367e-05	1.33549e-05	1.46231e-05	1.46156e-05	1.46071e-05
1628.56	8.25	4.16741e-06	4.1793e-06	4.1922e-06	3.96873e-06	3.98064e-06	3.96809e-06	4.03754e-06	4.03711e-06	4.04766e-06
1636.98	8.25	1.25927e-05	1.25862e-05	1.25615e-05	1.21068e-05	1.21188e-05	1.20663e-05	1.2253e-05	1.22547e-05	1.22429e-05
1645.4	8.25	3.23162e-05	3.23492e-05	3.23719e-05	3.37586e-05	3.37734e-05	3.38152e-05	3.30116e-05	3.30289e-05	3.30619e-05
1653.81	8.25	1.61799e-05	1.61832e-05	1.61517e-05	1.55181e-05	1.55078e-05	1.54906e-05	1.57528e-05	1.57623e-05	1.57305e-05
1662.23	8.25	2.99295e-06	2.98987e-06	2.98839e-06	2.55749e-06	2.55438e-06	2.56344e-06	2.67655e-06	2.67627e-06	2.68363e-06
1670.65	8.25	1.26864e-06	1.26919e-06	1.28038e-06	1.02368e-06	1.03579e-06	1.03757e-06	1.12646e-06	1.1272e-06	1.14559e-06
1679.06	8.25	3.17002e-07	2.87819e-07	3.03641e-07	2.64232e-07	2.66489e-07	2.59935e-07	2.72442e-07	2.74276e-07	2.7243e-07
1687.48	8.25	1.00964e-07	9.78679e-08	1.08645e-07	1.12118e-07	9.04841e-08	1.04287e-07	1.15434e-07	8.94064e-08	9.72272e-08
1695.9	8.25	1.45812e-08	3.20909e-08	1.30366e-08	4.57133e-08	1.50516e-08	1.69473e-08	1.75077e-08	1.45413e-08	1.00451e-08
1704.31	8.25	1.90766e-08	8.72728e-09	2.746e-08	9.88738e-09	1.05572e-08	1.13071e-08	1.96219e-08	3.60874e-08	3.5357e-08
1712.73	8.25	4.39418e-08	1.96565e-08	1.71632e-08	1.77456e-08	1.08301e-08	1.56593e-08	2.15115e-08	3.27273e-08	3.17785e-08
1721.15	8.25	2.30259e-08	8.82129e-09	3.62949e-08	3.22563e-08	2.82022e-24	1.97057e-08	6.39453e-09	0	2.33141e-08
1729.56	8.25	7.17989e-09	2.00357e-08	7.42762e-09	0	0	0	1.11179e-24	0	1.5491e-24
1737.98	8.25	0	8.89185e-09	1.14447e-08	0	0	0	0	0	0
1746.4	8.25	0	0	0	0	0	0	0	0	0
1754.81	8.25	2.94078e-07	3.08532e-07	2.99322e-07	2.15362e-07	2.05817e-07	2.06526e-07	2.50311e-07	2.47359e-07	2.66931e-07
1763.23	8.25	2.42904e-07	2.51749e-07	2.77103e-07	1.53411e-07	1.78083e-07	1.50121e-07	1.78939e-07	1.86285e-07	1.7574e-07
1771.65	8.25	6.55443e-08	6.42557e-08	9.04192e-08	6.08554e-08	3.14729e-08	2.50664e-08	2.47117e-08	5.1704e-08	2.50541e-08
1780.06	8.25	5.1746e-09	6.49461e-09	1.67193e-08	4.3532e-09	8.86689e-09	0	4.27804e-09	0	4.83785e-08
1788.48	8.25	3.19853e-07	3.29312e-07	3.21828e-07	2.08003e-07	2.51586e-07	2.05138e-07	2.54214e-07	2.46415e-07	2.49154e-07
1796.9	8.25	1.45039e-07	1.18633e-07	1.7504e-07	1.02874e-07	4.00958e-08	1.01544e-07	1.34782e-07	9.83449e-08	8.72706e-08
1805.31	8.25	4.96959e-08	5.66575e-08	1.77361e-07	2.54964e-08	7.78399e-08	5.38703e-10	4.52361e-08	8.73772e-08	2.84099e-08
1813.73	8.25	6.29271e-08	0	6.09719e-09	2.15188e-08	0	1.1436e-23	4.34141e-08	9.78775e-08	0
1822.15	8.25	4.11916e-11	2.01391e-09	1.4651e-08	0	0	0	0	0	0
1830.56	8.25	0	0	0	0	0	0	0	0	0
1838.98	8.25	0	0	0	0	0	0	0	0	0
1847.4	8.25	0	0	0	0	0	0	0	0	0
1855.82	8.25	0	0	0	0	0	0	0	0	0
1864.23	8.25	1.64356e-08	3.12542e-10	6.47002e-08	1.90691e-07	6.35148e-09	7.60495e-08	6.85275e-09	0	9.70206e-09
1872.65	8.25	1.13436e-05	4.03054e-06	2.69954e-06	1.06318e-05	3.21915e-06	2.00387e-06	1.08237e-05	3.64297e-06	2.42717e-06
1881.07	8.25	6.2806e-05	6.01221e-05	3.20453e-05	6.41231e-05	6.14811e-05	2.73715e-05	6.32433e-05	6.04005e-05	2.98793e-05
1889.48	8.25	1.6329e-05	1.54667e-05	8.51016e-06	1.60162e-05	1.54507e-05	7.64352e-06	1.60743e-05	1.52503e-05	7.92866e-06
1897.9	8.25	3.17869e-06	3.29925e-06	1.36983e-06	2.80704e-06	2.82315e-06	9.85561e-07	2.87522e-06	2.97227e-06	1.14904e-06
1906.32	8.25	1.37666e-06	1.05114e-06	2.27528e-07	1.10048e-06	9.15462e-07	2.01564e-07	1.02624e-06	9.64636e-07	3.0192e-07
1914.73	8.25	6.9196e-07	5.44985e-07	2.5642e-07	6.0208e-07	3.75688e-07	1.65985e-07	5.9776e-07	5.01878e-07	1.85543e-07
1923.15	8.25	7.71367e-07	6.67581e-07	3.98564e-07	4.71613e-07	5.0663e-07	2.09134e-07	6.15472e-07	5.48041e-07	2.76426e-07
1931.57	8.25	2.45932e-06	3.41683e-06	4.0324e-06	1.73897e-06	2.43779e-06	3.24954e-06	1.91745e-06	2.67886e-06	3.37881e-06
1939.98	8.25	0.000120263	0.000159089	0.000199537	8.9629e-05	0.000116046	0.000148892	0.000101962	0.000133457	0.000169526
1948.4	8.25	0.000743173	0.000767295	0.00078336	0.000683101	0.000709954	0.000737176	0.000707317	0.000732709	0.000754025
1956.82	8.25	0.0015224	0.00147549	0.00136855	0.00154305	0.00150734	0.00143143	0.00152577	0.0014845	0.00139016
1965.23	8.25	0.00110124	0.00108812	0.00106784	0.00113572	0.00112445	0.00110746	0.00111362	0.00110137	0.00108181
1973.65	8.25	0.000389286	0.000390446	0.000392629	0.000377441	0.00037873	0.000382113	0.000381289	0.000382554	0.000385267
1982.07	8.25	7.62756e-05	7.44032e-05	7.0668e-05	6.611e-05	6.46713e-05	6.17519e-05	7.01594e-05	6.85114e-05	6.52121e-05
1990.48	8.25	5.49344e-05	5.48177e-05	5.43603e-05	4.93074e-05	4.92007e-05	4.88917e-05	5.13306e-05	5.12396e-05	5.07832e-05
1998.9	8.25	0.00106638	0.00107932	0.00110571	0.00101174	0.00102422	0.0010485	0.00103383	0.00104658	0.00107203
2007.32	8.25	0.00289535	0.00285526	0.00279346	0.00291954	0.00288264	0.00282648	0.00289877	0.0028604	0.0028009
2015.73	8.25	0.00271001	0.00271817	0.00272957	0.00271535	0.00272307	0.00273538	0.00269881	0.0027066	0.00271816
2024.15	8.25	0.000881142	0.000886452	0.000892294	0.00078947	0.000793309	0.00079758	0.000826423	0.000830828	0.000835923
2032.57	8.25	0.000335555	0.000334406	0.000332709	0.00029529	0.000294622	0.000293507	0.000310983	0.000310119	0.00030873
2040.98	8.25	0.000302543	0.000301925	0.000300987	0.000301639	0.000301145	0.000300264	0.000300556	0.000299948	0.000299101
2049.4	8.25	0.000727233	0.000725535	0.000722092	0.000719063	0.000717703	0.000715005	0.000719904	0.000718429	0.000715349
2057.82	8.25	0.000844941	0.000845693	0.000846761	0.000884468	0.00088574	0.000887855	0.000862612	0.000863518	0.000865002
2066.23	8.25	0.000894811	0.000895447	0.000896966	0.000919269	0.000919835	0.000921152	0.000903518	0.000904152	0.000905602
2074.65	8.25	0.000604709	0.000603969	0.000602555	0.000565651	0.000565004	0.000563722	0.000580957	0.000580288	0.000578951
2083.07	8.25	0.000333057	0.000332856	0.000332559	0.000297461	0.000297339	0.000297135	0.000311506	0.000311324	0.0003111
2091.48	8.25	0.000204995	0.000205076	0.000205093	0.000174617	0.000174723	0.00017486	0.000186685	0.000186801	0.00018686
2099.9	8.25	7.1009e-05	7.08983e-05	7.07048e-05	6.23274e-05	6.21465e-05	6.18833e-05	6.55391e-05	6.54061e-05	6.51312e-05
2108.32	8.25	2.83826e-05	2.83098e-05	2.81658e-05	2.60331e-05	2.59354e-05	2.57692e-05	2.6723e-05	2.66316e-05	2.65051e-05
2116.73	8.25	1.96702e-05	1.97049e-05	1.97024e-05	1.8101e-05	1.81427e-05	1.81672e-05	1.84939e-05	1.8542e-05	1.85698e-05
2125.15	8.25	3.95193e-06	3.9597e-06	3.96782e-06	2.95678e-06	3.00635e-06	2.99562e-06	3.44537e-06	3.49146e-06	3.49282e-06
2133.57	8.25	1.98586e-06	1.96169e-06	1.96985e-06	1.76565e-06	1.77603e-06	1.76562e-06	1.86365e-06	1.88044e-06	1.8928e-06
2141.98	8.25	2.78092e-06	2.76998e-06	2.77713e-06	2.55092e-06	2.57496e-06	2.53561e-06	2.58418e-06	2.56558e-06	2.58088e-06
2150.4	8.25	1.90009e-05	1.90217e-05	1.90779e-05	1.94063e-05	1.94239e-05	1.94736e-05	1.91428e-05	1.9178e-05	1.92171e-05
2158.82	8.25	1.15301e-05	1.14956e-05	1.14247e-05	1.17908e-05	1.17772e-05	1.17172e-05	1.16286e-05	1.15606e-05	1.15462e-05
2167.23	8.25	9.47059e-06	9.4681e-06	9.45622e-06	9.20024e-06	9.18513e-06	9.18616e-06	9.29404e-06	9.28295e-06	9.26566e-06
2175.65	8.25	2.70009e-06	2.73537e-06	2.73938e-06	2.57154e-06	2.58316e-06	2.59232e-06	2.66714e-06	2.64928e-06	2.67356e-06
2184.07	8.25	6.95987e-07	6.93218e-07	6.88597e-07	6.23922e-07	6.04296e-07	6.12175e-07	6.43959e-07	6.33612e-07	6.75131e-07
2192.48	8.25	7.34957e-07	7.91835e-07	8.18157e-07	6.9465e-07	7.00649e-07	6.82441e-07	7.26992e-07	6.78556e-07	7.47987e-07
2200.9	8.25	1.40836e-07	1.88796e-07	1.81408e-07	1.06887e-07	1.34345e-07	1.30309e-07	1.47681e-07	1.34742e-07	1.80246e-07
2209.32	8.25	2.77118e-07	2.53157e-07	2.63018e-07	2.69484e-07	2.26996e-07	2.61946e-07	2.24303e-07	2.83523e-07	2.72448e-07
2217.73	8.25	2.0288e-07	1.78777e-07	1.62379e-07	1.82399e-07	1.86011e-07	1.98125e-07	1.50609e-07	2.35852e-07	2.07628e-07
2226.15	8.25	1.70808e-07	2.62596e-07	1.68759e-07	1.70677e-07	1.80344e-07	1.69392e-07	1.97184e-07	1.95078e-07	1.74595e-07
2234.57	8.25	9.44145e-08	5.54479e-08	5.72404e-08	4.12658e-08	7.40188e-08	5.05525e-08	6.94885e-08	5.6448e-08	3.25123e-08
2242.98	8.25	1.75441e-08	2.24043e-08	2.47182e-08	3.24426e-08	4.5874e-08	4.05446e-08	1.95547e-08	3.19319e-08	9.00109e-24
2251.4	8.25	2.11839e-07	1.73259e-07	1.79035e-07	1.7939e-07	1.98692e-07	1.75533e-07	1.8442e-07	1.97921e-07	2.02493e-07
2259.82	8.25	8.82865e-08	1.60949e-07	1.07372e-07	1.35364e-07	1.14744e-07	1.48708e-07	1.39856e-07	9.60963e-08	1.27667e-07
2268.23	8.25	3.43747e-08	5.5608e-08	3.82109e-08	2.74666e-08	2.18122e-08	4.47701e-08	3.74171e-08	8.83301e-09	6.53818e-08
2276.65	8.25	6.07716e-08	1.38765e-07	9.86319e-08	6.45112e-08	4.19279e-08	7.44598e-08	7.59082e-08	1.33464e-07	7.00589e-08
2285.07	8.25	1.83385e-08	7.37311e-09	1.297e-08	4.63377e-08	5.4096e-09	1.88572e-08	2.45439e-08	0	7.85869e-08
2293.48	8.25	3.55469e-08	0	4.97888e-08	0	1.114e-08	1.38664e-08	5.37887e-08	0	3.62136e-08
2301.9	8.25	0	0	0	3.63486e-08	0	2.02346e-08	0	0	0
2310.32	8.25	0	0	0	0	2.36283e-08	0	0	0	3.67145e-08
2318.73	8.25	0	0	0	0	2.31046e-08	0	0	0	1.95893e-08
2327.15	8.25	0	0	0	0	0	0	0	0	0
2335.57	8.25	0	0	0	0	0	0	0	0	0
2343.98	8.25	5.91752e-09	0	0	0	0	0	0	0	0
2352.4	8.25	7.41539e-09	0	0	0	0	0	0	0	0
2360.82	8.25	0	0	0	0	0	0	1.07802e-08	0	0
2369.23	8.25	0	4.00084e-08	0	0	0	0	0	0	0
2377.65	8.25	0	1.57986e-08	0	0	0	0	0	0	0
2386.07	8.25	0	0	0	0	0	0	0	0	0
2394.48	8.25	0	0	2.40604e-09	0	0	0	0	0	0
2402.9	8.25	0	0	0	6.4853e-09	0	2.05385e-08	1.97049e-08	0	0
2411.32	8.25	0	0	0	1.22196e-08	0	0	0	0	1.99705e-10
2419.73	8.25	0	0	6.01929e-09	3.14735e-08	0	0	0	0	3.52281e-10
2428.15	8.25	0	4.32276e-24	0	0	0	1.7598e-08	0	0	3.15832e-08
2436.57	8.25	0	0	0	0	0	0	1.43465e-08	2.06529e-09	0
2444.98	8.25	1.64984e-08	1.30111e-25	0	3.92072e-08	0	6.25134e-08	2.9914e-08	2.65051e-08	0
2453.4	8.25	0	4.21808e-08	0	0	0	0	2.08532e-08	5.50473e-08	0
2461.82	8.25	1.54421e-08	2.27095e-08	3.68724e-08	0	4.55169e-09	3.52607e-08	1.80375e-08	4.25713e-08	0
2470.23	8.25	1.09529e-07	2.22226e-07	1.25199e-08	7.03632e-08	6.44344e-08	1.13602e-07	9.67205e-08	9.98559e-08	1.06847e-08
2478.65	8.25	5.70349e-07	4.38925e-07	2.26069e-07	4.21663e-07	2.83973e-07	2.13618e-07	3.75664e-07	3.73498e-07	1.76726e-07
2487.07	8.25	6.00352e-06	5.97953e-06	6.10351e-06	4.70589e-06	4.56655e-06	4.58316e-06	5.15858e-06	5.17647e-06	5.19552e-06
2495.48	8.25	1.90486e-06	1.96072e-06	2.16299e-06	1.70733e-06	1.8008e-06	1.91588e-06	1.67249e-06	1.76197e-06	1.8396e-06
2503.9	8.25	1.52404e-06	1.46175e-06	1.55067e-06	1.42766e-06	1.53908e-06	1.50299e-06	1.53637e-06	1.443e-06	1.49509e-06
2512.32	8.25	1.67023e-06	1.6349e-06	1.55686e-06	1.35283e-06	1.31799e-06	1.32521e-06	1.55253e-06	1.52043e-06	1.41678e-06
2520.73	8.25	1.11165e-06	1.25422e-06	9.16248e-07	1.0337e-06	1.03317e-06	8.7221e-07	1.17959e-06	1.19485e-06	8.59027e-07

## Sheet: k_GF5
Wavelength	FWHM	k_Summer_L	k_Summer_M	k_Summer_H	k_Winter_L	k_Winter_M	k_Winter_H	k_1976_L	k_1976_M	k_1976_H
1004.77	7.67828	0	0	0	0	0	0	0	0	0
1013.2	7.68189	0	0	0	0	0	0	0	0	0
1021.62	7.68551	0	0	0	0	0	0	0	0	0
1030.05	7.68912	0	0	0	0	0	0	0	0	0
1038.48	7.69273	6.65363e-07	6.59069e-07	6.58265e-07	6.65433e-07	6.7516e-07	6.836e-07	6.65594e-07	6.70116e-07	6.67464e-07
1046.91	7.69634	7.06222e-07	7.01195e-07	6.99987e-07	7.17875e-07	7.23147e-07	7.20726e-07	7.01085e-07	6.95557e-07	6.96203e-07
1055.33	7.69995	7.07969e-07	7.13501e-07	6.97497e-07	6.97819e-07	6.89991e-07	6.88681e-07	6.992e-07	6.98494e-07	6.95123e-07
1063.76	7.70356	3.08105e-07	2.92381e-07	2.99845e-07	3.1235e-07	3.0207e-07	3.06512e-07	3.01117e-07	3.07993e-07	2.9293e-07
1072.19	7.70718	5.64456e-08	6.27306e-08	6.52953e-08	3.79479e-08	4.16563e-08	5.75803e-08	5.86165e-08	4.80511e-08	4.77608e-08
1080.62	7.71079	8.28535e-09	7.12821e-09	6.84981e-09	1.3467e-08	2.71536e-09	8.66681e-09	4.13874e-09	1.3425e-08	1.68945e-08
1089.04	7.7144	1.23716e-09	0	1.70801e-09	0	0	-1.54206e-09	1.26916e-09	0	0
1097.47	7.71801	0	3.20495e-09	0	0	2.77996e-09	0	0	2.37497e-09	0
1105.9	7.72162	0	0	0	0	0	0	0	0	0
1114.32	7.72523	1.84283e-09	0	4.13162e-09	0	0	1.00949e-24	0	0	0
1122.75	7.72885	0	0	0	0	0	0	0	0	0
1131.18	7.73246	0	0	0	2.23841e-09	0	0	0	0	0
1139.61	7.73607	0	0	0	0	0	0	0	0	0
1148.03	7.73968	0	0	0	0	0	0	0	0	0
1156.46	7.74329	0	0	0	0	0	0	0	0	0
1164.89	7.7469	0	0	0	0	0	0	0	0	0
1173.32	7.75052	0	0	0	0	0	0	0	3.93877e-09	0
1181.74	7.75413	0	0	0	0	0	0	0	0	0
1190.17	7.75774	0	0	0	0	0	0	1.57295e-09	0	0
1198.6	7.76135	5.54176e-09	3.42967e-09	2.48154e-09	8.18838e-10	9.07018e-10	1.08833e-09	5.29281e-09	0	2.83607e-09
1206.8	7.3271	4.36081e-05	4.2774e-05	4.18389e-05	4.43952e-05	4.35528e-05	4.26084e-05	4.3837e-05	4.29937e-05	4.20639e-05
1215.2	7.76857	9.70185e-06	9.81293e-06	9.9912e-06	9.34028e-06	9.44961e-06	9.65087e-06	9.46535e-06	9.57567e-06	9.77011e-06
1223.6	8.1949	1.97409e-05	1.99026e-05	2.01388e-05	2.0153e-05	2.03006e-05	2.05401e-05	1.98731e-05	2.0019e-05	2.02513e-05
1232.34	8.48475	1.93481e-06	1.93989e-06	1.93432e-06	1.69387e-06	1.70797e-06	1.70422e-06	1.79318e-06	1.7957e-06	1.78863e-06
1240.76	8.26	4.82729e-07	4.72686e-07	4.756e-07	4.52257e-07	4.47532e-07	4.51034e-07	4.56249e-07	4.58843e-07	4.57417e-07
1249.21	7.78302	1.33181e-07	1.38385e-07	1.33118e-07	1.46709e-07	1.40037e-07	1.34926e-07	1.37237e-07	1.37663e-07	1.36732e-07
1257.66	7.78663	2.12245e-07	1.94151e-07	2.09019e-07	1.91324e-07	2.03063e-07	2.15335e-07	2.13995e-07	2.005e-07	1.8998e-07
1266.1	7.79024	2.28553e-07	2.42146e-07	2.35335e-07	2.5189e-07	2.42126e-07	2.4046e-07	2.45653e-07	2.28239e-07	2.18951e-07
1274.55	7.79386	2.87226e-09	0	0	0	0	4.19027e-09	0	0	0
1283	7.79747	5.46304e-08	4.67048e-08	4.75663e-08	4.05374e-08	3.21802e-08	4.71781e-08	3.96229e-08	3.20754e-08	3.28951e-08
1291.45	7.80108	2.33894e-06	2.34345e-06	2.35738e-06	2.36907e-06	2.37704e-06	2.37952e-06	2.33446e-06	2.33901e-06	2.35567e-06
1299.9	7.80469	3.98934e-07	4.00256e-07	4.20007e-07	3.93888e-07	3.82682e-07	3.83545e-07	4.02093e-07	3.88463e-07	4.09067e-07
1308.34	7.8083	5.04074e-08	6.52052e-08	4.05043e-08	5.63359e-08	4.88552e-08	5.14003e-08	6.38886e-08	5.79763e-08	4.77145e-08
1316.79	7.81191	8.63833e-06	8.6516e-06	8.6365e-06	8.86309e-06	8.90106e-06	8.89601e-06	8.71886e-06	8.76185e-06	8.74275e-06
1325.24	7.81553	9.44878e-07	9.66325e-07	9.54796e-07	8.23932e-07	8.55038e-07	8.69467e-07	8.52427e-07	8.90547e-07	8.92002e-07
1333.69	7.81914	8.64681e-07	8.5526e-07	8.4692e-07	8.13854e-07	7.96183e-07	7.89731e-07	8.30724e-07	8.26561e-07	8.16047e-07
1342.14	7.82275	3.20675e-06	3.29756e-06	3.34299e-06	3.30139e-06	3.45115e-06	3.49456e-06	3.25114e-06	3.35617e-06	3.38728e-06
1350.58	7.82636	3.30866e-07	2.39324e-07	3.37315e-07	2.5309e-07	3.32377e-07	3.37399e-07	2.93704e-07	3.46923e-07	4.39003e-07
1359.03	7.82997	8.09074e-09	4.71823e-08	0	2.11181e-08	1.08632e-08	6.31473e-09	3.31e-08	6.09398e-08	0
1367.48	7.83358	1.7099e-07	9.95487e-08	3.24908e-08	1.35345e-07	5.85648e-08	4.32397e-08	2.13728e-07	1.12138e-07	3.14613e-08
1375.93	7.8372	2.57498e-07	2.23458e-07	1.14366e-07	2.47016e-07	2.31551e-07	7.5648e-08	2.51e-07	2.181e-07	7.83337e-08
1384.37	7.84081	2.63967e-08	8.44899e-09	2.9795e-09	0	1.01423e-08	0	6.01991e-08	1.18125e-08	-9.22675e-09
1392.82	7.84442	1.61986e-10	0	0	8.96615e-10	0	0	0	0	0
1401.27	7.84803	0	0	0	2.84886e-08	0	0	0	0	8.02179e-09
1409.72	7.85164	0	0	-4.86736e-09	0	0	0	0	0	0
1418.17	7.85525	0	1.75453e-08	0	8.90922e-09	0	1.79924e-08	6.49802e-09	0	8.0964e-10
1426.61	7.85887	1.51977e-06	2.25526e-06	3.47672e-06	1.35619e-06	2.10537e-06	3.08233e-06	1.37915e-06	2.12708e-06	3.22153e-06
1435.06	7.86248	0.000337607	0.000320344	0.000286847	0.000351994	0.000335282	0.000304849	0.00034383	0.000326655	0.000293558
1443.51	7.86609	0.000142812	0.000144318	0.000145916	0.000132589	0.000134293	0.000137846	0.000136297	0.000137819	0.000140043
1451.96	7.8697	1.25522e-05	1.25675e-05	1.24526e-05	9.64384e-06	9.7055e-06	9.65528e-06	1.06704e-05	1.06989e-05	1.06008e-05
1460.4	7.87331	5.44704e-07	5.41052e-07	5.11666e-07	3.50439e-07	4.03265e-07	3.54764e-07	4.12847e-07	4.40578e-07	4.58902e-07
1468.85	7.87692	5.19389e-06	5.00767e-06	4.42902e-06	5.1676e-06	5.06741e-06	4.5257e-06	5.14516e-06	4.98579e-06	4.47261e-06
1477.3	7.88054	9.92296e-06	9.36945e-06	8.66476e-06	1.01895e-05	9.65169e-06	8.98016e-06	1.00224e-05	9.50925e-06	8.82536e-06
1485.75	7.88415	1.94865e-06	1.92101e-06	1.89797e-06	1.72684e-06	1.72215e-06	1.67513e-06	1.83398e-06	1.78895e-06	1.77386e-06
1494.2	7.88776	3.2477e-06	3.33968e-06	3.52052e-06	3.22597e-06	3.3198e-06	3.48055e-06	3.23427e-06	3.31344e-06	3.50013e-06
1502.64	7.89137	5.52664e-07	5.45352e-07	5.5822e-07	5.04039e-07	5.11342e-07	5.15224e-07	5.11859e-07	5.11057e-07	5.36523e-07
1511.09	7.89498	1.17609e-08	2.34428e-08	2.01615e-08	1.7947e-08	1.15112e-08	1.04869e-08	1.237e-08	2.21322e-08	2.64534e-08
1519.54	7.89859	2.13065e-07	2.10404e-07	2.03482e-07	1.58996e-07	1.40473e-07	1.59923e-07	1.52155e-07	1.65773e-07	1.60561e-07
1527.99	7.90221	7.58796e-06	7.58189e-06	7.61958e-06	6.81293e-06	6.8263e-06	6.83129e-06	7.0808e-06	7.08996e-06	7.10877e-06
1536.43	7.90582	3.92026e-05	3.92007e-05	3.92064e-05	4.02611e-05	4.0254e-05	4.02301e-05	3.95925e-05	3.95832e-05	3.95856e-05
1544.88	7.90943	1.47796e-05	1.47476e-05	1.47429e-05	1.44547e-05	1.44613e-05	1.44497e-05	1.45219e-05	1.45006e-05	1.45074e-05
1553.33	6.6598	2.74748e-07	2.68534e-07	2.75875e-07	2.4953e-07	2.5557e-07	2.46141e-07	2.50965e-07	2.50039e-07	2.63148e-07
1560.93	8.4042	4.4095e-07	4.3914e-07	4.44738e-07	4.10503e-07	4.21127e-07	4.20535e-07	4.31405e-07	4.27973e-07	4.24233e-07
1569.23	7.8809	0.000135765	0.000135819	0.000135908	0.000132087	0.000132118	0.000132234	0.000133046	0.0001331	0.000133194
1577.61	7.45885	0.000167824	0.00016779	0.000167754	0.000172266	0.000172224	0.000172178	0.000169478	0.000169457	0.000169395
1586.31	7.4983	2.57465e-05	2.57201e-05	2.56451e-05	2.31974e-05	2.31688e-05	2.3119e-05	2.41516e-05	2.41458e-05	2.40767e-05
1594.96	7.7622	1.06817e-05	1.0676e-05	1.07023e-05	9.41473e-06	9.41205e-06	9.41742e-06	9.88009e-06	9.88781e-06	9.90455e-06
1603.38	7.93471	0.000195287	0.000195283	0.000195311	0.000202599	0.000202627	0.000202655	0.000198514	0.000198522	0.000198554
1611.79	7.93832	0.000134528	0.000134511	0.000134447	0.000133025	0.00013302	0.000132971	0.000133064	0.000133016	0.000132998
1620.21	7.94194	1.64654e-05	1.6485e-05	1.64464e-05	1.33157e-05	1.33237e-05	1.33119e-05	1.45786e-05	1.45713e-05	1.45628e-05
1628.63	7.94555	4.20805e-06	4.21999e-06	4.23361e-06	4.03168e-06	4.04526e-06	4.03143e-06	4.0914e-06	4.09074e-06	4.10066e-06
1637.05	7.94916	1.18565e-05	1.18473e-05	1.18206e-05	1.13363e-05	1.13446e-05	1.12916e-05	1.14985e-05	1.14982e-05	1.14834e-05
1645.47	7.95277	3.18795e-05	3.19141e-05	3.19397e-05	3.33622e-05	3.33743e-05	3.34203e-05	3.26049e-05	3.26194e-05	3.26535e-05
1653.89	7.95638	1.41458e-05	1.41447e-05	1.41064e-05	1.33669e-05	1.33537e-05	1.33348e-05	1.36608e-05	1.36682e-05	1.36327e-05
1662.31	7.95999	2.98385e-06	2.98093e-06	2.97948e-06	2.55239e-06	2.54913e-06	2.55813e-06	2.66921e-06	2.66856e-06	2.67608e-06
1670.73	7.96361	1.19695e-06	1.19613e-06	1.21055e-06	9.80149e-07	9.94111e-07	9.93885e-07	1.06167e-06	1.06324e-06	1.08371e-06
1679.15	7.96722	3.03483e-07	2.70729e-07	2.86267e-07	2.50319e-07	2.55698e-07	2.46935e-07	2.61112e-07	2.58522e-07	2.57499e-07
1687.57	7.97083	9.62885e-08	9.5071e-08	1.07139e-07	1.10802e-07	8.82393e-08	1.01589e-07	1.15585e-07	8.73994e-08	9.48989e-08
1695.99	7.97444	8.75138e-09	3.28815e-08	1.1626e-08	4.38774e-08	1.60022e-08	1.40241e-08	1.78491e-08	1.45351e-08	1.05087e-08
1704.41	7.97805	1.59741e-08	9.14735e-09	2.82059e-08	1.0271e-08	1.08944e-08	1.17494e-08	1.60258e-08	3.13485e-08	3.21748e-08
1712.83	7.98166	4.31225e-08	2.03011e-08	1.40851e-08	1.61358e-08	7.48947e-09	1.61862e-08	2.19085e-08	2.78358e-08	3.0976e-08
1721.25	7.98528	2.28948e-08	8.94202e-09	3.64437e-08	3.25494e-08	2.61759e-24	1.9877e-08	6.35757e-09	0	2.35581e-08
1729.67	7.98889	6.64075e-09	1.98476e-08	6.96508e-09	0	0	0	1.23445e-24	0	1.49281e-24
1738.08	7.9925	0	9.36711e-09	1.1641e-08	0	0	0	0	0	0
1746.5	7.99611	0	0	0	0	0	0	0	0	0
1754.92	7.99972	3.11142e-07	3.27595e-07	3.18344e-07	2.28675e-07	2.18391e-07	2.19544e-07	2.65335e-07	2.62542e-07	2.84367e-07
1763.34	8.00333	2.54114e-07	2.5837e-07	2.87158e-07	1.5491e-07	1.87053e-07	1.58037e-07	1.874e-07	1.95344e-07	1.79278e-07
1771.76	8.00695	5.94093e-08	6.05972e-08	8.20069e-08	5.75636e-08	2.77509e-08	2.06447e-08	2.0942e-08	4.74174e-08	1.92676e-08
1780.18	8.01056	0	3.78692e-09	0	4.68199e-09	8.31176e-09	0	4.31991e-09	0	4.97093e-08
1788.6	8.01417	3.20814e-07	3.2981e-07	3.21989e-07	2.08676e-07	2.52194e-07	2.05761e-07	2.54959e-07	2.47424e-07	2.49994e-07
1797.02	8.01778	1.44786e-07	1.18696e-07	1.74514e-07	1.02794e-07	4.01903e-08	1.01752e-07	1.34653e-07	9.85718e-08	8.68601e-08
1805.44	8.02139	4.97079e-08	5.70832e-08	1.7849e-07	2.54646e-08	7.84178e-08	5.42828e-10	4.55566e-08	8.81155e-08	2.85345e-08
1813.86	8.025	6.37455e-08	0	6.19049e-09	2.15432e-08	0	1.77584e-23	4.37268e-08	9.92557e-08	0
1822.28	8.02862	4.1501e-11	2.03955e-09	1.46665e-08	0	0	0	0	0	0
1830.7	8.03223	0	0	0	0	0	0	0	0	0
1839.12	8.03584	0	0	0	0	0	0	0	0	0
1847.54	8.03945	0	0	0	0	0	0	0	0	0
1855.96	8.04306	0	0	0	0	0	0	0	0	0
1864.38	8.04667	1.64002e-08	3.07141e-10	6.50001e-08	1.91537e-07	6.36919e-09	7.60051e-08	6.81743e-09	0	9.7801e-09
1872.79	8.05029	1.13183e-05	4.01339e-06	2.68677e-06	1.06098e-05	3.20413e-06	1.99296e-06	1.07992e-05	3.62681e-06	2.41516e-06
1881.21	8.0539	6.29821e-05	6.02361e-05	3.21681e-05	6.4308e-05	6.15966e-05	2.7485e-05	6.34249e-05	6.05156e-05	2.99977e-05
1889.63	8.05751	1.6301e-05	1.54472e-05	8.51122e-06	1.59863e-05	1.54313e-05	7.64904e-06	1.60461e-05	1.52305e-05	7.93105e-06
1898.05	8.06112	3.1782e-06	3.29632e-06	1.36984e-06	2.80708e-06	2.82006e-06	9.84965e-07	2.87447e-06	2.96895e-06	1.14875e-06
1906.47	8.06473	1.41577e-06	1.07017e-06	2.34985e-07	1.13048e-06	9.37096e-07	2.02612e-07	1.07639e-06	9.80121e-07	3.24632e-07
1914.89	8.06834	7.20408e-07	5.47297e-07	2.70453e-07	6.00912e-07	3.75536e-07	1.67527e-07	6.17355e-07	5.03342e-07	1.93624e-07
1923.31	8.07196	7.5741e-07	6.78441e-07	3.87262e-07	4.68856e-07	5.20905e-07	2.16983e-07	6.20256e-07	5.46463e-07	2.72838e-07
1931.73	8.07557	2.19137e-06	3.20461e-06	3.97483e-06	1.5738e-06	2.28937e-06	3.19932e-06	1.71306e-06	2.50585e-06	3.32428e-06
1940.15	8.07918	0.000129669	0.000167611	0.000204406	9.72522e-05	0.000123208	0.000153307	0.000110297	0.000141174	0.000174095
1948.57	8.08279	0.000743061	0.000766716	0.000782511	0.000682978	0.000709385	0.000736305	0.000707199	0.000732139	0.000753169
1956.99	8.0864	0.00152676	0.00147977	0.00137244	0.00154772	0.00151196	0.00143575	0.00153027	0.00148894	0.00139425
1965.41	8.09001	0.00110312	0.00108997	0.00106971	0.00113786	0.00112656	0.00110957	0.00111562	0.00110335	0.00108379
1973.83	8.09363	0.000358612	0.000357959	0.000356953	0.000347044	0.000346754	0.000347389	0.000350898	0.000350495	0.000350272
1982.25	8.09724	7.60589e-05	7.4196e-05	7.04824e-05	6.58912e-05	6.44567e-05	6.15522e-05	6.99412e-05	6.83e-05	6.50187e-05
1990.67	8.10085	6.11147e-05	6.14146e-05	6.14267e-05	5.45329e-05	5.47501e-05	5.48151e-05	5.69376e-05	5.72093e-05	5.71799e-05
1999.09	8.10446	0.0012026	0.00121575	0.00123782	0.0011422	0.00115566	0.00117777	0.0011666	0.00117997	0.00120217
2007.5	8.10807	0.00285216	0.00281734	0.00276286	0.00287679	0.00284519	0.00279603	0.00285603	0.00282291	0.0027706
2015.92	8.11168	0.00276946	0.00277554	0.00278175	0.00278425	0.00278914	0.00279532	0.00276277	0.0027682	0.00277418
2024.34	8.1153	0.000887974	0.000889976	0.000890944	0.000795855	0.000797112	0.000797317	0.000832974	0.00083445	0.000835065
2032.76	8.11891	0.000323374	0.000322214	0.000320647	0.000285358	0.000284735	0.000283813	0.000300048	0.000299195	0.000297966
2041.18	8.12252	0.000306236	0.000305744	0.000305056	0.000305006	0.000304619	0.000303947	0.000304051	0.000303572	0.000302947
2049.6	8.12613	0.000727734	0.000726035	0.000722591	0.000719597	0.000718236	0.000715536	0.000720422	0.000718946	0.000715864
2058.02	8.12974	0.000822926	0.000823691	0.000824733	0.000861591	0.000862901	0.000865037	0.000840235	0.000841169	0.000842648
2066.44	8.13335	0.000891493	0.000892591	0.000894941	0.000910896	0.000911917	0.000914112	0.000897472	0.000898564	0.000900882
2074.86	8.13697	0.000605047	0.000604306	0.000602887	0.000565966	0.000565317	0.000564029	0.000581283	0.000580611	0.000579269
2083.28	8.14058	0.000335754	0.000335592	0.000335351	0.000299485	0.000299383	0.000299235	0.000313802	0.00031365	0.000313483
2091.7	8.14419	0.000204999	0.00020508	0.000205097	0.000174615	0.000174721	0.000174858	0.000186685	0.000186801	0.00018686
2100.12	8.1478	7.09992e-05	7.08877e-05	7.06927e-05	6.23223e-05	6.21406e-05	6.1876e-05	6.55312e-05	6.53975e-05	6.51212e-05
2108.54	8.4804	2.84215e-05	2.83483e-05	2.82033e-05	2.60678e-05	2.59697e-05	2.58029e-05	2.67599e-05	2.66681e-05	2.6541e-05
2116.97	8.023	1.93523e-05	1.94013e-05	1.9425e-05	1.77336e-05	1.77866e-05	1.78342e-05	1.81763e-05	1.82383e-05	1.82939e-05
2125.41	8.476	3.64376e-06	3.6523e-06	3.66965e-06	2.68902e-06	2.73632e-06	2.73161e-06	3.15398e-06	3.19112e-06	3.20382e-06
2134.3	8.38695	1.8371e-06	1.8174e-06	1.81571e-06	1.61388e-06	1.63403e-06	1.6205e-06	1.69765e-06	1.7161e-06	1.72904e-06
2142.31	8.12115	3.21858e-06	3.20676e-06	3.2191e-06	2.97374e-06	2.99329e-06	2.95167e-06	3.01371e-06	2.99457e-06	3.00976e-06
2150.88	8.16947	1.84011e-05	1.84233e-05	1.84661e-05	1.89044e-05	1.89117e-05	1.89541e-05	1.86079e-05	1.8643e-05	1.86719e-05
2159.31	8.17308	1.21448e-05	1.21074e-05	1.20363e-05	1.23839e-05	1.23744e-05	1.23114e-05	1.22303e-05	1.21603e-05	1.21459e-05
2167.73	8.1767	8.99903e-06	8.99343e-06	8.99222e-06	8.73165e-06	8.71208e-06	8.71439e-06	8.82643e-06	8.81141e-06	8.8004e-06
2176.16	8.18031	2.49999e-06	2.53434e-06	2.53112e-06	2.3819e-06	2.39437e-06	2.40003e-06	2.47365e-06	2.45363e-06	2.47903e-06
2184.59	8.18392	7.46765e-07	7.46479e-07	7.52677e-07	6.86066e-07	6.57441e-07	6.71439e-07	7.00374e-07	6.85994e-07	7.32206e-07
2193.01	8.18753	7.21599e-07	7.72886e-07	7.94141e-07	6.75156e-07	6.79765e-07	6.60289e-07	7.06625e-07	6.58566e-07	7.26717e-07
2201.44	8.19114	1.10011e-07	1.38782e-07	1.50967e-07	8.65556e-08	9.98615e-08	1.07848e-07	1.12521e-07	1.04371e-07	1.3652e-07
2209.87	8.19475	2.96111e-07	2.72221e-07	2.79036e-07	2.83919e-07	2.43485e-07	2.79125e-07	2.38127e-07	2.96453e-07	2.8815e-07
2218.3	8.19837	1.93329e-07	1.7359e-07	1.54264e-07	1.75796e-07	1.76e-07	1.84899e-07	1.41757e-07	2.24784e-07	2.04024e-07
2226.72	8.20198	1.64599e-07	2.57436e-07	1.59018e-07	1.61824e-07	1.67075e-07	1.74007e-07	1.9643e-07	1.79344e-07	1.62817e-07
2235.15	8.20559	8.42407e-08	5.14848e-08	4.88844e-08	3.75176e-08	6.50728e-08	4.01152e-08	6.12698e-08	5.23438e-08	3.26425e-08
2243.58	8.2092	2.87072e-08	3.21021e-08	3.67286e-08	3.47465e-08	5.42037e-08	4.22149e-08	2.36245e-08	3.49612e-08	4.03168e-09
2252.01	8.21281	2.13114e-07	1.88053e-07	1.81618e-07	1.84875e-07	2.25499e-07	1.88564e-07	2.00899e-07	2.02058e-07	2.19334e-07
2260.43	8.21642	8.43181e-08	1.59003e-07	1.04691e-07	1.3197e-07	1.06863e-07	1.47942e-07	1.34683e-07	9.26346e-08	1.17748e-07
2268.86	8.22004	3.17159e-08	3.7102e-08	2.043e-08	8.05395e-09	1.55883e-08	1.56646e-08	3.26198e-08	0	4.11533e-08
2277.29	8.22365	5.73343e-08	1.39144e-07	9.79103e-08	6.51438e-08	4.12923e-08	5.97118e-08	7.03011e-08	1.33307e-07	7.14273e-08
2285.71	8.22726	2.26588e-08	8.3478e-09	1.4684e-08	3.3792e-08	0	2.08985e-08	2.38303e-08	0	7.56951e-08
2294.14	8.23087	3.43723e-08	0	4.83118e-08	0	1.15955e-08	1.20198e-08	4.81957e-08	0	3.53381e-08
2302.57	8.23448	0	0	0	3.72722e-08	0	2.24491e-08	0	0	0
2311	8.23809	0	0	0	0	2.31924e-08	0	0	0	3.69424e-08
2319.42	8.24171	0	0	0	0	2.11033e-08	0	0	0	0
2327.85	8.24532	0	0	0	0	0	0	0	0	0
2336.28	8.24893	0	0	0	0	0	0	0	0	0
2344.71	8.25254	7.08898e-09	0	0	0	0	0	0	0	0
2353.13	8.25615	6.0895e-09	0	0	0	0	0	0	0	0
2361.56	8.25976	0	0	0	0	0	0	8.68543e-09	0	0
2369.99	8.26338	0	5.73435e-08	0	0	0	0	0	0	0
2378.41	8.26699	0	1.10821e-08	0	0	0	0	0	0	0
2386.84	8.2706	0	0	0	0	0	0	0	0	0
2395.27	8.27421	0	0	2.62009e-09	0	0	0	0	0	0
2403.7	8.27782	0	0	0	9.13774e-09	0	2.68405e-08	2.23439e-08	0	0
2412.12	8.28143	0	0	0	8.10843e-09	0	0	0	0	2.50986e-10
2420.55	8.28505	0	0	5.21963e-09	2.48128e-08	0	0	0	0	2.2109e-10
2428.98	8.28866	0	7.24863e-24	0	0	0	1.70281e-08	0	0	3.43009e-08
2437.41	8.29227	1.42162e-08	0	0	0	0	0	1.69714e-08	1.89561e-09	0
2445.83	8.29588	1.40818e-08	1.3701e-25	0	3.95524e-08	0	6.42829e-08	1.97345e-08	3.38215e-08	0
2454.26	8.29949	0	4.61724e-08	0	0	0	3.92669e-08	2.48694e-08	3.04243e-08	0
2462.69	8.3031	1.83498e-08	2.81241e-08	4.50077e-08	0	4.67495e-09	5.34536e-08	0	1.93816e-08	0
2471.11	8.30672	1.09121e-07	1.9893e-07	1.28763e-08	8.96199e-08	6.49045e-08	1.65905e-07	9.94024e-08	1.12106e-07	1.21032e-08
2479.54	8.31033	8.34616e-07	6.15563e-07	3.19322e-07	5.92822e-07	3.98225e-07	2.73446e-07	5.84713e-07	5.17355e-07	2.48678e-07
2487.97	8.31394	5.51441e-06	5.59414e-06	5.82834e-06	4.43402e-06	4.39948e-06	4.47609e-06	4.82548e-06	4.925e-06	5.03289e-06
2496.4	8.31755	1.86323e-06	1.88777e-06	2.0693e-06	1.72472e-06	1.80787e-06	1.90695e-06	1.62816e-06	1.71325e-06	1.79683e-06
2504.82	8.32116	1.36452e-06	1.30735e-06	1.35677e-06	1.24783e-06	1.38193e-06	1.32098e-06	1.41631e-06	1.26304e-06	1.31347e-06
2513.25	8.32477	1.71984e-06	1.72121e-06	1.56991e-06	1.38609e-06	1.33238e-06	1.36136e-06	1.56818e-06	1.62667e-06	1.45619e-06
