# Supplementary material for: Towards global carbon transparency: Spaceborne imaging spectroscopy enables precise CO2 emission quantification at facility scale
Source: Research Square preprint supplement (doi:10.21203/rs.3.rs-5913782/v1), 2025-01-29
Supplement: Supplementary file 24 [file CO2_k_v7.xlsx]

## Sheet: k_ZY1E
Wavelength	FWHM	k_Summer_L	k_Summer_M	k_Summer_H	k_Winter_L	k_Winter_M	k_Winter_H	k_1976_L	k_1976_M	k_1976_H
1005.6	16.26	0	0	0	0	0	0	0	0	0
1022.21	16.26	0	0	0	0	0	0	0	0	0
1039.19	16.26	4.46085e-07	4.4285e-07	4.46092e-07	4.45755e-07	4.56617e-07	4.59534e-07	4.52268e-07	4.49463e-07	4.46341e-07
1055.87	16.26	7.4091e-07	7.36673e-07	7.29718e-07	7.38303e-07	7.38675e-07	7.36375e-07	7.27454e-07	7.31625e-07	7.32719e-07
1072.55	16.26	7.75349e-08	8.27258e-08	7.87828e-08	7.68409e-08	7.31611e-08	8.696e-08	7.80439e-08	7.42306e-08	8.9023e-08
1089.23	16.26	1.13559e-09	0	1.37916e-09	1.51531e-09	2.10386e-09	8.91701e-10	2.31291e-09	2.48144e-09	1.20091e-09
1105.91	16.26	0	0	0	0	0	0	0	0	0
1122.59	16.26	0	0	0	1.14178e-09	0	0	0	0	0
1139.44	16.26	0	0	0	6.3891e-10	0	0	1.38798e-09	0	5.21647e-09
1156.41	16.26	0	0	0	0	0	0	0	0	0
1173.29	16.26	0	0	0	0	0	0	0	0	0
1190.17	16.26	0	0	8.17758e-10	0	0	0	0	0	0
1207.04	16.26	3.06757e-05	3.00945e-05	2.95236e-05	3.10313e-05	3.04539e-05	2.98697e-05	3.07147e-05	3.0135e-05	2.95675e-05
1223.92	16.26	1.83496e-05	1.84408e-05	1.85719e-05	1.85419e-05	1.8628e-05	1.87574e-05	1.83641e-05	1.84327e-05	1.85654e-05
1240.8	16.26	5.07767e-07	5.09339e-07	5.1177e-07	4.89311e-07	4.83625e-07	4.9076e-07	5.07404e-07	5.04103e-07	4.97189e-07
1257.4	16.26	2.18229e-07	2.23946e-07	2.19399e-07	2.1209e-07	2.13891e-07	2.16597e-07	2.15124e-07	2.11514e-07	2.12186e-07
1274.15	16.26	8.88465e-09	5.01034e-09	8.27382e-09	4.66682e-09	1.24813e-08	6.20802e-09	1.22988e-08	3.91057e-09	7.24229e-09
1290.9	16.26	1.79797e-06	1.78791e-06	1.79789e-06	1.80239e-06	1.80553e-06	1.81128e-06	1.79785e-06	1.79399e-06	1.79084e-06
1307.65	16.26	9.33039e-07	8.91696e-07	8.17188e-07	9.22316e-07	8.87707e-07	8.22209e-07	9.17941e-07	8.8789e-07	8.08954e-07
1324.4	16.26	2.34947e-06	2.41503e-06	2.53144e-06	2.28792e-06	2.36114e-06	2.46108e-06	2.29876e-06	2.37833e-06	2.47369e-06
1341.16	16.26	3.00791e-06	3.08424e-06	3.06246e-06	3.03216e-06	3.12719e-06	3.16532e-06	2.99913e-06	3.07542e-06	3.10549e-06
1357.91	16.26	1.31818e-07	5.69909e-08	2.9587e-08	1.23497e-07	7.27527e-08	2.76533e-08	7.68489e-08	7.22855e-08	1.68892e-08
1374.87	16.26	2.78973e-07	2.50164e-07	1.01734e-07	2.6827e-07	2.34105e-07	9.3979e-08	2.64392e-07	2.32099e-07	9.36572e-08
1391.65	16.26	3.61891e-08	1.38531e-08	0	0	1.05937e-08	1.83744e-08	1.07449e-09	1.26523e-08	2.36786e-25
1408.49	16.26	1.38805e-25	0	5.84865e-09	4.17443e-10	0	0	0	0	0
1425.33	16.26	3.23407e-05	2.93406e-05	2.72508e-05	3.25074e-05	2.90882e-05	2.63062e-05	3.2437e-05	2.92452e-05	2.66336e-05
1442.17	16.26	0.000171053	0.000165865	0.000151038	0.000163736	0.000159375	0.000147304	0.000165973	0.000161115	0.000147251
1459.01	16.26	1.51237e-06	1.43539e-06	1.3224e-06	1.03758e-06	9.79002e-07	9.01649e-07	1.1836e-06	1.11561e-06	1.04e-06
1475.85	16.26	1.07952e-05	1.00591e-05	8.93295e-06	1.10216e-05	1.03e-05	9.20728e-06	1.08916e-05	1.01851e-05	9.03616e-06
1492.7	16.26	2.41904e-06	2.50246e-06	2.65748e-06	2.35857e-06	2.4513e-06	2.58706e-06	2.38006e-06	2.45902e-06	2.61266e-06
1509.54	16.26	6.34393e-08	5.74061e-08	4.31071e-08	4.09607e-08	3.76339e-08	4.21455e-08	3.85192e-08	3.97628e-08	3.98531e-08
1526.38	16.26	7.62482e-06	7.66804e-06	7.76441e-06	6.98452e-06	7.03095e-06	7.10776e-06	7.21358e-06	7.25417e-06	7.34407e-06
1543.22	16.26	2.08802e-05	2.08595e-05	2.08398e-05	2.11329e-05	2.11344e-05	2.11209e-05	2.09251e-05	2.09047e-05	2.08994e-05
1560.06	16.26	1.102e-06	1.1029e-06	1.10651e-06	9.25223e-07	9.30157e-07	9.25084e-07	9.94569e-07	9.97882e-07	9.98052e-07
1576.9	16.26	0.000177709	0.000177699	0.000177672	0.000181276	0.000181279	0.000181231	0.00017885	0.000178834	0.000178795
1593.71	16.26	2.06905e-05	2.06995e-05	2.07409e-05	1.95385e-05	1.95496e-05	1.95868e-05	1.99259e-05	1.99543e-05	1.99916e-05
1610.39	16.26	0.000141627	0.000141619	0.000141569	0.000142725	0.000142731	0.000142686	0.000141577	0.000141569	0.000141539
1627.13	16.26	4.68004e-06	4.6803e-06	4.69949e-06	4.11241e-06	4.1179e-06	4.10897e-06	4.33455e-06	4.34354e-06	4.34436e-06
1644.01	16.26	3.13593e-05	3.13636e-05	3.13874e-05	3.22148e-05	3.22274e-05	3.22526e-05	3.17065e-05	3.17264e-05	3.17457e-05
1660.89	16.26	3.87203e-06	3.86173e-06	3.86067e-06	3.30739e-06	3.31144e-06	3.31844e-06	3.49144e-06	3.49904e-06	3.48997e-06
1677.77	16.26	4.29573e-07	4.11546e-07	4.13825e-07	3.50647e-07	3.66953e-07	3.58503e-07	3.65092e-07	3.92912e-07	3.83124e-07
1694.65	16.26	1.89082e-08	2.75581e-08	3.14038e-08	4.34395e-08	8.9752e-09	3.62571e-08	2.86936e-08	1.49661e-08	2.46737e-08
1711.53	16.26	1.47872e-08	2.19559e-08	1.70024e-08	2.07865e-08	1.88212e-08	1.72781e-08	2.32475e-08	2.5836e-08	2.48968e-08
1728.41	16.26	5.14697e-09	6.8328e-09	1.27195e-09	1.28911e-08	0	2.54001e-09	1.9852e-24	7.06912e-09	1.85265e-08
1745.28	16.26	2.92613e-09	0	0	0	0	0	0	0	0
1762.16	16.26	2.25795e-07	2.3568e-07	2.50451e-07	1.59454e-07	1.55565e-07	1.75047e-07	2.0689e-07	1.96272e-07	2.12072e-07
1778.85	16.26	4.84692e-08	2.01129e-08	3.28701e-08	2.42392e-08	9.02568e-09	1.22344e-08	1.80621e-08	1.37339e-08	2.35852e-08
1795.43	16.26	1.57321e-07	1.54819e-07	1.52093e-07	1.2548e-07	1.27253e-07	1.37713e-07	1.29336e-07	1.10243e-07	1.91785e-07
1812.02	16.26	3.01356e-08	1.25919e-08	2.1696e-07	1.10985e-08	9.76597e-09	3.8358e-25	3.33964e-08	4.33667e-08	4.63241e-09
1828.82	16.26	0	0	0	0	9.39034e-11	0	0	8.68056e-10	0
1845.62	16.26	0	0	0	0	0	0	0	0	0
1862.42	16.26	1.20147e-08	6.54531e-08	1.23103e-08	3.34201e-09	7.05671e-09	1.05157e-08	5.74468e-09	2.78795e-09	7.56038e-09
1880.13	16.26	5.46139e-05	5.16831e-05	2.58838e-05	5.59199e-05	5.26711e-05	2.17638e-05	5.51049e-05	5.18108e-05	2.40584e-05
1896.11	16.26	5.12301e-06	4.94251e-06	2.37713e-06	4.62228e-06	4.6294e-06	1.9561e-06	4.80984e-06	4.69619e-06	2.01676e-06
1912.97	16.26	9.76373e-07	6.8572e-07	3.13497e-07	8.16104e-07	5.4563e-07	1.72005e-07	7.90812e-07	5.82838e-07	2.58415e-07
1929.93	16.26	2.04724e-06	2.66457e-06	3.0642e-06	1.39008e-06	1.93069e-06	2.55481e-06	1.55852e-06	2.23764e-06	2.67732e-06
1946.82	16.26	0.000567103	0.000604458	0.00064274	0.000514765	0.000554863	0.000606156	0.000535739	0.000573951	0.000617909
1963.72	16.26	0.00107432	0.00105364	0.00102695	0.00109767	0.00107893	0.00105631	0.00108106	0.0010612	0.00103564
1980.61	16.26	0.00012117	0.000120712	0.000117631	0.000110395	0.000110465	0.000108469	0.000114639	0.000114452	0.000111972
1997.51	16.26	0.000627709	0.000630382	0.000638175	0.000597415	0.000600753	0.000608877	0.000610124	0.000613203	0.00062127
2014.4	16.26	0.00254855	0.0025509	0.00255143	0.00254278	0.00254515	0.00254736	0.00253408	0.00253653	0.00253778
2031.3	16.26	0.000398215	0.000397606	0.000396612	0.000350286	0.000350015	0.000349448	0.000369317	0.000368923	0.000368182
2048.13	16.26	0.000582118	0.000583508	0.000585828	0.000574708	0.000575771	0.000577623	0.000575779	0.000576962	0.000579079
2064.9	16.26	0.000790028	0.00079115	0.000793142	0.000812935	0.000814284	0.0008166	0.000798605	0.00079984	0.000801991
2081.61	16.26	0.000364594	0.000363636	0.000361964	0.0003282	0.000327306	0.000325738	0.000342657	0.00034173	0.000340134
2098.45	16.26	8.77674e-05	8.78106e-05	8.781e-05	7.55449e-05	7.54862e-05	7.54461e-05	8.02033e-05	8.02216e-05	8.01422e-05
2115.29	16.26	2.25789e-05	2.2537e-05	2.24579e-05	2.10702e-05	2.10525e-05	2.09542e-05	2.14415e-05	2.14271e-05	2.13429e-05
2132.13	16.26	2.27192e-06	2.24972e-06	2.26179e-06	1.8785e-06	1.90187e-06	1.89838e-06	2.08984e-06	2.10218e-06	2.11212e-06
2148.97	16.26	1.48076e-05	1.47767e-05	1.47116e-05	1.49771e-05	1.49385e-05	1.48488e-05	1.48239e-05	1.48026e-05	1.47227e-05
2165.81	16.26	1.09694e-05	1.09349e-05	1.09314e-05	1.07921e-05	1.07933e-05	1.07834e-05	1.08173e-05	1.08138e-05	1.07979e-05
2182.64	16.26	9.84435e-07	9.87332e-07	1.00109e-06	9.1315e-07	8.87786e-07	9.03482e-07	9.3164e-07	9.384e-07	9.51072e-07
2199.48	16.26	2.70635e-07	3.00223e-07	2.79778e-07	1.92772e-07	1.95863e-07	2.12451e-07	2.32311e-07	1.99609e-07	2.48981e-07
2216.32	16.26	2.44766e-07	2.29811e-07	2.11067e-07	2.59444e-07	2.26492e-07	2.31584e-07	1.95802e-07	2.85418e-07	2.48083e-07
2233.16	16.26	1.0674e-07	1.03824e-07	7.36317e-08	6.33703e-08	8.24859e-08	6.45364e-08	1.03385e-07	6.92487e-08	6.23718e-08
2250	16.26	1.61726e-07	1.52293e-07	1.62004e-07	1.48821e-07	1.6991e-07	1.5896e-07	1.67276e-07	1.57827e-07	1.49361e-07
2266.84	16.26	2.99785e-08	6.45998e-08	5.38041e-08	5.74838e-08	3.87115e-08	6.37186e-08	2.73612e-08	3.08649e-08	2.69545e-08
2283.67	16.26	2.25097e-08	5.98745e-08	4.10668e-08	1.27345e-08	1.97201e-08	1.63118e-08	3.2543e-08	4.42801e-08	5.49739e-08
2300.51	16.26	9.25687e-09	0	0	2.45833e-08	0	1.25091e-09	1.88034e-08	0	8.507e-09
2317.35	16.26	0	2.07646e-08	0	4.47472e-09	5.2405e-09	0	0	3.09103e-09	0
2334.19	16.26	0	6.10876e-09	0	0	0	0	0	0	0
2350.4	16.26	0	0	0	0	0	0	0	0	0
2366.68	16.26	0	0	0	0	0	0	7.91262e-09	0	2.31264e-09
2384.12	16.26	0	0	0	0	0	0	2.47914e-09	2.45787e-08	1.86397e-08
2400.81	16.26	0	0	3.83312e-09	0	0	0	0	1.48667e-08	0
2417.5	16.26	0	0	0	0	0	1.8893e-08	0	1.27967e-08	1.22863e-08
2434.19	16.26	0	5.07095e-09	0	1.65764e-08	0	0	1.8139e-08	0	1.46647e-09
2450.88	16.26	0	0	5.70469e-10	0	2.30906e-08	6.26252e-08	0	1.41438e-08	0
2467.57	16.26	1.01542e-07	3.64929e-08	6.90685e-08	4.69452e-08	3.21463e-08	1.26924e-07	8.2591e-08	2.90066e-08	3.90862e-08
2484.32	16.26	4.17642e-06	3.86658e-06	3.27282e-06	3.16143e-06	2.95162e-06	2.47702e-06	3.54196e-06	3.24122e-06	2.73328e-06
2501.08	16.26	1.8251e-06	1.93029e-06	1.92746e-06	1.65165e-06	1.66973e-06	1.75793e-06	1.67056e-06	1.69266e-06	1.74076e-06

## Sheet: k_ZY1F
Wavelength	FWHM	k_Summer_L	k_Summer_M	k_Summer_H	k_Winter_L	k_Winter_M	k_Winter_H	k_1976_L	k_1976_M	k_1976_H
1009.7	16.848	0	0	0	0	0	0	0	0	0
1026.55	16.846	0	0	0	0	0	0	0	0	0
1043.4	16.846	5.0158e-07	4.93487e-07	4.90127e-07	4.95522e-07	5.05616e-07	5.07624e-07	4.95418e-07	4.9493e-07	4.94509e-07
1060.24	16.849	2.9308e-07	2.84106e-07	2.82891e-07	2.85054e-07	2.72574e-07	2.7714e-07	2.79098e-07	2.84006e-07	2.74481e-07
1077.09	16.845	2.69919e-08	2.90132e-08	3.15037e-08	2.35335e-08	1.7915e-08	2.59286e-08	2.44591e-08	2.29506e-08	3.2048e-08
1093.94	16.845	1.57903e-09	2.25701e-09	1.61935e-09	0	2.02186e-09	-1.33636e-09	7.03113e-10	2.12132e-09	0
1110.78	16.848	7.62326e-10	0	9.05307e-10	4.65726e-10	0	1.06305e-24	0	0	0
1127.63	16.848	0	0	0	9.74746e-10	0	0	0	0	0
1144.48	16.845	0	0	0	0	0	0	0	0	0
1161.32	16.849	0	0	0	0	0	0	0	0	0
1178.17	16.845	0	0	0	0	0	0	0	1.57536e-09	0
1195.02	16.848	1.1862e-07	1.12357e-07	1.02127e-07	1.07076e-07	1.02869e-07	9.43519e-08	1.13024e-07	1.05981e-07	9.8019e-08
1211.86	16.845	1.90212e-05	1.87801e-05	1.85719e-05	1.89002e-05	1.86645e-05	1.84618e-05	1.88514e-05	1.86113e-05	1.84113e-05
1228.71	16.848	7.17034e-06	7.18406e-06	7.19452e-06	6.89952e-06	6.91343e-06	6.91823e-06	6.97094e-06	6.97707e-06	6.97552e-06
1245.56	16.848	1.85924e-07	1.78886e-07	1.82734e-07	1.76677e-07	1.73728e-07	1.70889e-07	1.71941e-07	1.77992e-07	1.74148e-07
1262.4	16.846	2.36452e-07	2.33803e-07	2.36341e-07	2.34777e-07	2.35968e-07	2.45054e-07	2.39593e-07	2.32722e-07	2.19387e-07
1279.25	16.845	2.05499e-08	1.74435e-08	1.81001e-08	1.57416e-08	1.48575e-08	1.79854e-08	1.52717e-08	1.24174e-08	1.31387e-08
1296.09	16.849	1.46259e-06	1.46994e-06	1.49417e-06	1.48677e-06	1.49289e-06	1.50661e-06	1.47256e-06	1.47531e-06	1.49882e-06
1312.94	16.845	4.78494e-06	4.70061e-06	4.5469e-06	4.85158e-06	4.77413e-06	4.62761e-06	4.80121e-06	4.72153e-06	4.57216e-06
1329.79	16.846	4.75201e-07	4.9194e-07	4.67856e-07	4.19769e-07	4.19833e-07	4.26548e-07	4.34893e-07	4.49937e-07	4.42755e-07
1346.63	16.848	1.95308e-06	2.33192e-06	2.76469e-06	1.90658e-06	2.37813e-06	2.79977e-06	1.91606e-06	2.34236e-06	2.74594e-06
1363.48	16.848	5.75261e-08	8.00252e-08	1.14277e-08	1.12816e-07	2.79173e-08	1.65886e-08	7.47801e-08	5.54461e-08	1.71942e-08
1380.33	16.845	1.4903e-07	1.44669e-07	5.47711e-08	1.49679e-07	1.53341e-07	3.40433e-08	1.6255e-07	1.51401e-07	3.55394e-08
1397.17	16.848	3.37528e-11	0	0	1.16849e-08	0	0	0	0	2.40304e-09
1414.02	16.848	6.72362e-10	4.32426e-09	-1.66681e-09	2.37124e-09	0	7.06835e-09	1.52338e-09	0	3.06621e-10
1430.87	16.845	0.000174982	0.000152754	0.000125007	0.000180573	0.000158591	0.000130104	0.000177698	0.000155628	0.000127103
1447.71	16.846	6.05159e-05	5.75003e-05	5.14806e-05	5.37203e-05	5.13822e-05	4.64087e-05	5.62678e-05	5.36138e-05	4.80595e-05
1464.56	16.846	1.21224e-06	1.05491e-06	8.06085e-07	1.11261e-06	1.01111e-06	7.45412e-07	1.1377e-06	9.93376e-07	7.8843e-07
1481.41	16.846	6.0386e-06	5.76615e-06	5.46099e-06	5.95549e-06	5.68251e-06	5.34247e-06	5.97427e-06	5.69063e-06	5.39025e-06
1498.25	16.849	2.59677e-06	2.61382e-06	2.66402e-06	2.56909e-06	2.594e-06	2.63262e-06	2.56895e-06	2.58528e-06	2.63546e-06
1515.1	16.844	6.0749e-08	7.26397e-08	6.01419e-08	5.1767e-08	4.03951e-08	4.77856e-08	3.91032e-08	5.11687e-08	4.98097e-08
1531.94	16.848	2.46596e-05	2.47734e-05	2.50152e-05	2.44038e-05	2.4502e-05	2.46907e-05	2.43851e-05	2.44939e-05	2.47107e-05
1548.79	16.848	5.39394e-06	5.36436e-06	5.35156e-06	5.1796e-06	5.17977e-06	5.15682e-06	5.23567e-06	5.22131e-06	5.21386e-06
1565.64	16.846	5.19111e-05	5.19488e-05	5.20142e-05	4.99556e-05	4.99865e-05	5.0059e-05	5.05735e-05	5.0604e-05	5.06657e-05
1582.49	16.845	9.34562e-05	9.34135e-05	9.3339e-05	9.26667e-05	9.26257e-05	9.25668e-05	9.25505e-05	9.25255e-05	9.24494e-05
1599.33	16.848	0.00010971	0.000109774	0.000109954	0.0001106	0.000110679	0.000110848	0.000109724	0.000109795	0.000109973
1616.18	16.846	6.03595e-05	6.03699e-05	6.03453e-05	5.65967e-05	5.66128e-05	5.66034e-05	5.79281e-05	5.79095e-05	5.79264e-05
1633.03	16.846	6.31969e-06	6.32787e-06	6.3213e-06	6.13036e-06	6.14128e-06	6.11559e-06	6.18015e-06	6.18598e-06	6.18762e-06
1649.87	16.848	2.52199e-05	2.52371e-05	2.52514e-05	2.567e-05	2.56789e-05	2.56957e-05	2.53864e-05	2.54002e-05	2.54064e-05
1666.72	16.845	2.30555e-06	2.30257e-06	2.31043e-06	1.88252e-06	1.88504e-06	1.8931e-06	2.05023e-06	2.05494e-06	2.06191e-06
1683.56	16.849	1.93527e-07	1.7421e-07	1.87133e-07	1.73778e-07	1.65337e-07	1.67721e-07	1.79484e-07	1.65731e-07	1.69394e-07
1700.41	16.845	1.43613e-08	1.65687e-08	1.51779e-08	2.38498e-08	1.13297e-08	7.8355e-09	1.8796e-08	2.01536e-08	2.23876e-08
1717.26	16.846	2.58974e-08	1.23265e-08	2.42378e-08	1.86588e-08	1.76912e-09	1.62318e-08	8.58578e-09	6.02087e-09	1.90591e-08
1734.1	16.849	1.57351e-09	1.06816e-08	6.43812e-09	0	0	0	7.37059e-25	0	5.70394e-25
1750.95	16.845	1.38545e-07	1.43821e-07	1.39515e-07	9.85613e-08	9.61793e-08	9.65883e-08	1.16127e-07	1.15751e-07	1.22603e-07
1767.8	16.845	1.49489e-07	1.48773e-07	1.83031e-07	1.03198e-07	9.10073e-08	8.45796e-08	9.57128e-08	1.0993e-07	9.05042e-08
1784.64	16.849	1.73346e-07	1.78995e-07	1.51802e-07	1.16622e-07	1.33338e-07	1.06105e-07	1.39471e-07	1.31831e-07	1.50453e-07
1801.49	16.845	9.93473e-08	9.51685e-08	1.58755e-07	6.81817e-08	4.76284e-08	5.54464e-08	9.13129e-08	9.70617e-08	7.43326e-08
1818.34	16.846	3.64063e-08	6.17059e-10	7.03398e-09	2.11255e-08	0	3.67271e-24	3.29674e-08	6.63851e-08	0
1835.18	16.849	0	0	0	0	0	0	0	0	0
1852.03	16.846	0	0	0	0	0	0	0	0	0
1868.88	16.845	7.19988e-07	3.7012e-07	6.65243e-07	7.07118e-07	2.4471e-07	5.61164e-07	6.21878e-07	3.06095e-07	5.70682e-07
1885.72	16.848	3.80751e-05	3.42365e-05	1.93117e-05	3.80236e-05	3.38585e-05	1.65716e-05	3.7879e-05	3.38337e-05	1.79114e-05
1902.57	16.845	1.99914e-06	2.12697e-06	5.57518e-07	1.70939e-06	1.81422e-06	4.28363e-07	1.69411e-06	1.91177e-06	4.98205e-07
1919.41	16.848	7.62567e-07	6.47732e-07	3.75923e-07	5.14133e-07	4.72264e-07	2.08813e-07	6.09875e-07	5.52093e-07	2.65029e-07
1936.26	16.849	4.23888e-05	6.04086e-05	9.40595e-05	3.14681e-05	4.41409e-05	6.97824e-05	3.5751e-05	5.05044e-05	7.93061e-05
1953.11	16.845	0.00116596	0.00116517	0.00112835	0.00113277	0.00114633	0.00114284	0.00114295	0.00114912	0.00112718
1969.96	16.845	0.000662285	0.000655941	0.00064726	0.000661792	0.000656623	0.000650304	0.000659097	0.000653384	0.000645553
1986.8	16.846	5.15366e-05	5.09956e-05	5.00636e-05	4.56108e-05	4.51111e-05	4.43397e-05	4.78373e-05	4.73313e-05	4.64254e-05
2003.65	16.846	0.00230793	0.00230845	0.00230187	0.00225438	0.00225838	0.00225748	0.00227332	0.00227548	0.00227152
2020.49	16.848	0.00135133	0.00134403	0.00133067	0.00126638	0.00125878	0.00124533	0.00129949	0.00129185	0.00127838
2037.34	16.846	0.000299124	0.000298224	0.00029696	0.000283993	0.000283281	0.000282125	0.000288989	0.000288148	0.000286945
2054.19	16.848	0.000929011	0.000928489	0.000927249	0.000954703	0.000954377	0.000953574	0.000939058	0.000938583	0.000937522
2071.03	16.845	0.000734172	0.000733797	0.000732978	0.000712404	0.000712043	0.000711242	0.000718979	0.000718633	0.000717849
2087.88	16.846	0.000282883	0.000282776	0.000282543	0.000247593	0.000247561	0.000247502	0.000261625	0.000261562	0.000261423
2104.73	16.846	4.17867e-05	4.15278e-05	4.11136e-05	3.73277e-05	3.70604e-05	3.66368e-05	3.8852e-05	3.86056e-05	3.8177e-05
2121.57	16.849	8.73196e-06	8.71428e-06	8.66811e-06	7.4923e-06	7.49909e-06	7.46373e-06	7.92011e-06	7.9483e-06	7.89898e-06
2138.42	16.845	2.38977e-06	2.37496e-06	2.37688e-06	2.12687e-06	2.15946e-06	2.13204e-06	2.20041e-06	2.19735e-06	2.21415e-06
2155.27	16.848	1.29383e-05	1.29132e-05	1.28361e-05	1.3402e-05	1.33766e-05	1.32983e-05	1.31435e-05	1.30966e-05	1.30394e-05
2172.11	16.846	5.56944e-06	5.6015e-06	5.64184e-06	5.35938e-06	5.37048e-06	5.40264e-06	5.45961e-06	5.46209e-06	5.49183e-06
2188.96	16.846	8.40238e-07	8.76361e-07	8.98236e-07	8.05619e-07	7.91151e-07	7.98053e-07	8.28741e-07	7.96924e-07	8.47754e-07
2205.81	16.845	1.6336e-07	1.50731e-07	1.75988e-07	1.5729e-07	1.17862e-07	1.63107e-07	1.36925e-07	1.68244e-07	1.71476e-07
2222.65	16.85	1.95109e-07	2.32284e-07	1.57032e-07	1.86279e-07	1.85982e-07	1.7315e-07	1.73404e-07	2.16076e-07	2.06397e-07
2239.5	16.846	4.53883e-08	2.24488e-08	1.94343e-08	2.17594e-08	5.17903e-08	3.29987e-08	3.11708e-08	2.56144e-08	1.35493e-08
2256.35	16.845	1.58395e-07	1.8974e-07	1.56845e-07	1.78848e-07	1.9304e-07	1.82815e-07	1.87054e-07	1.6099e-07	1.88571e-07
2273.19	16.846	5.85587e-08	9.59437e-08	6.93601e-08	4.16134e-08	2.61945e-08	5.39384e-08	7.99853e-08	6.51957e-08	5.77885e-08
2290.04	16.848	2.6505e-08	7.19774e-09	3.86352e-08	1.82098e-08	4.22114e-09	2.90076e-08	5.20261e-08	0	4.66907e-08
2306.89	16.845	0	0	0	2.06694e-08	1.20989e-08	1.5664e-08	0	0	2.07173e-08
2323.73	16.848	0	0	0	0	5.61249e-09	0	0	0	0
2340.58	16.846	1.68822e-09	0	0	0	0	0	0	0	0
2357.43	16.848	0	0	0	0	0	0	8.366e-09	0	0
2374.27	16.846	0	3.66182e-08	0	0	0	0	0	0	0
2391.12	16.845	0	0	9.21486e-10	0	0	0	0	0	0
2407.96	16.848	0	0	0	1.10042e-08	0	2.10456e-08	1.21271e-08	0	4.96955e-11
2424.81	16.848	0	6.37311e-24	1.5057e-09	1.05867e-08	0	8.80454e-09	0	0	1.10789e-08
2441.66	16.845	1.79008e-08	-2.77806e-26	0	1.80522e-08	0	3.12777e-08	2.19075e-08	6.65845e-09	0
2458.5	16.849	4.25016e-09	3.57377e-08	9.88738e-09	0	1.99066e-09	4.11503e-08	2.5919e-08	5.10744e-08	0
2475.35	16.845	2.16703e-07	2.15499e-07	5.93271e-08	1.96214e-07	1.10095e-07	1.87198e-07	1.51197e-07	1.91036e-07	4.9034e-08
2492.2	16.846	3.24469e-06	3.29513e-06	3.54953e-06	2.72743e-06	2.75156e-06	2.8836e-06	2.8935e-06	2.95703e-06	3.07673e-06
2509.04	16.849	1.33893e-06	1.2496e-06	1.19853e-06	1.13289e-06	1.20213e-06	1.09052e-06	1.33492e-06	1.15377e-06	1.11006e-06

## Sheet: k_GF5B
Wavelength	FWHM	k_Summer_L	k_Summer_M	k_Summer_H	k_Winter_L	k_Winter_M	k_Winter_H	k_1976_L	k_1976_M	k_1976_H
1009	8.546	0	0	0	0	0	0	0	0	0
1017.42	8.546	0	0	0	0	0	0	0	0	0
1025.83	8.546	0	0	0	0	0	0	0	0	0
1034.25	8.546	2.66813e-07	2.65391e-07	2.65449e-07	2.69228e-07	2.67959e-07	2.75541e-07	2.67326e-07	2.66725e-07	2.69163e-07
1042.67	8.546	2.73331e-07	2.63827e-07	2.57175e-07	2.51348e-07	2.65672e-07	2.68551e-07	2.65549e-07	2.64514e-07	2.636e-07
1051.08	8.546	1.57026e-06	1.57439e-06	1.56965e-06	1.61639e-06	1.61883e-06	1.61073e-06	1.57452e-06	1.58005e-06	1.57579e-06
1059.5	8.546	1.45935e-07	1.34559e-07	1.34257e-07	1.36934e-07	1.1885e-07	1.2396e-07	1.27496e-07	1.33719e-07	1.24772e-07
1067.92	8.546	2.28084e-07	2.23149e-07	2.20328e-07	2.18133e-07	2.20564e-07	2.3102e-07	2.22341e-07	2.17082e-07	2.18561e-07
1076.33	8.546	2.99923e-08	3.24832e-08	3.52046e-08	2.87785e-08	2.0512e-08	2.93813e-08	3.01071e-08	2.47032e-08	3.7765e-08
1084.75	8.546	1.2096e-09	-2.46039e-26	1.85398e-09	0	0	0	0	1.9669e-09	0
1093.17	8.546	2.39341e-09	2.88579e-09	2.48572e-09	0	2.61539e-09	-2.06044e-09	1.10155e-09	2.92044e-09	0
1101.58	8.546	0	0	0	0	0	0	0	0	0
1110	8.546	7.68823e-10	0	0	0	0	3.71643e-25	0	0	0
1118.42	8.546	9.88134e-10	0	8.31912e-09	4.80974e-09	0	0	0	0	0
1126.83	8.546	0	0	0	0	0	0	0	0	0
1135.25	8.546	0	0	0	1.20891e-09	0	0	0	0	0
1143.67	8.546	0	0	0	0	0	0	0	0	0
1152.08	8.546	0	0	0	0	0	0	0	0	0
1160.5	8.546	0	0	0	0	0	0	0	0	0
1168.92	8.546	0	0	0	0	0	0	0	0	0
1177.33	8.546	0	0	0	0	0	0	0	2.40909e-09	0
1185.75	8.546	0	0	0	0	0	0	0	0	0
1194.17	8.546	0	0	0	0	0	0	1.24996e-09	0	0
1202.58	8.546	2.57715e-05	2.52028e-05	2.47753e-05	2.61619e-05	2.55879e-05	2.51932e-05	2.58893e-05	2.53132e-05	2.49156e-05
1211	8.546	1.75765e-05	1.73002e-05	1.7035e-05	1.72714e-05	1.70198e-05	1.6756e-05	1.72956e-05	1.70256e-05	1.67675e-05
1219.42	8.546	2.64548e-05	2.66126e-05	2.68349e-05	2.70809e-05	2.72408e-05	2.7504e-05	2.6684e-05	2.68537e-05	2.70868e-05
1227.83	8.546	6.54518e-06	6.55972e-06	6.57817e-06	6.05328e-06	6.06537e-06	6.0784e-06	6.21265e-06	6.2163e-06	6.21839e-06
1236.25	8.546	1.15468e-06	1.15507e-06	1.15366e-06	1.09757e-06	1.10351e-06	1.10255e-06	1.13268e-06	1.12897e-06	1.12862e-06
1244.67	8.546	1.08247e-07	9.47918e-08	1.03228e-07	9.53171e-08	9.15488e-08	8.71357e-08	8.80327e-08	9.6965e-08	9.11221e-08
1253.08	8.546	2.3026e-07	2.28054e-07	2.34747e-07	2.28648e-07	2.41914e-07	2.29962e-07	2.40298e-07	2.26762e-07	2.24852e-07
1261.5	8.546	2.55351e-07	2.45319e-07	2.48299e-07	2.4256e-07	2.42896e-07	2.60748e-07	2.48631e-07	2.49599e-07	2.34158e-07
1269.92	8.546	6.40039e-08	7.40403e-08	6.65723e-08	7.61569e-08	6.65789e-08	7.54939e-08	7.21833e-08	5.98157e-08	5.79707e-08
1278.33	8.546	0	0	0	0	4.45911e-09	0	0	0	0
1286.75	8.546	8.07499e-07	7.95637e-07	7.97978e-07	7.52646e-07	7.47544e-07	7.57764e-07	7.65071e-07	7.53957e-07	7.50718e-07
1295.17	8.546	1.80722e-06	1.80051e-06	1.81068e-06	1.85379e-06	1.85386e-06	1.85872e-06	1.82934e-06	1.82553e-06	1.83133e-06
1303.58	8.546	2.85907e-08	2.93158e-08	3.38249e-08	3.35329e-08	1.7667e-08	1.66245e-08	2.84429e-08	1.79395e-08	3.65226e-08
1312	8.546	4.15599e-06	4.05692e-06	3.87422e-06	4.16716e-06	4.07501e-06	3.90599e-06	4.14462e-06	4.04579e-06	3.87778e-06
1320.42	8.546	5.38792e-06	5.42176e-06	5.48228e-06	5.40487e-06	5.46633e-06	5.52098e-06	5.36036e-06	5.41308e-06	5.46558e-06
1328.83	8.546	9.19089e-08	1.24011e-07	8.74398e-08	5.55066e-08	6.26883e-08	7.18979e-08	6.99078e-08	9.31392e-08	7.90982e-08
1337.25	8.546	2.70787e-06	2.6475e-06	2.5159e-06	2.72292e-06	2.68321e-06	2.54398e-06	2.69708e-06	2.63749e-06	2.51869e-06
1345.66	8.546	2.17572e-06	2.46773e-06	2.91028e-06	2.12191e-06	2.48288e-06	2.89961e-06	2.13177e-06	2.45575e-06	2.8517e-06
1354.08	8.546	1.76384e-07	8.72847e-08	5.70659e-08	1.29904e-07	1.62247e-07	1.51535e-07	1.6093e-07	2.47608e-07	5.30848e-08
1362.5	8.546	1.01005e-08	7.8881e-08	0	1.18275e-07	1.54338e-08	6.18016e-09	1.17759e-08	9.26436e-09	1.48576e-08
1370.91	8.546	3.30597e-07	1.60954e-07	8.22864e-08	2.43315e-07	1.06183e-07	7.82114e-08	3.29412e-07	1.87404e-07	4.52865e-08
1379.33	8.546	1.63614e-07	1.75695e-07	6.77839e-08	1.78949e-07	1.8899e-07	3.92645e-08	1.82491e-07	1.77264e-07	4.98577e-08
1387.75	8.546	1.56659e-08	9.45613e-10	1.37387e-09	0	0	0	3.30183e-08	2.30793e-09	0
1396.16	8.546	0	0	0	1.49372e-09	0	0	0	0	0
1404.58	8.546	0	0	0	2.01239e-08	0	0	0	0	8.36492e-09
1413	8.546	0	0	-2.75871e-09	0	0	0	0	0	0
1421.41	8.546	2.31076e-08	4.56642e-08	1.08638e-08	1.0882e-08	2.38366e-08	2.59214e-08	1.27718e-08	3.00213e-08	1.89664e-08
1429.83	8.546	0.000146588	0.000116783	8.90999e-05	0.000151146	0.000122012	9.30354e-05	0.000149005	0.000119583	9.0852e-05
1438.25	8.546	0.000274924	0.000275118	0.000255657	0.000274973	0.00027553	0.000259647	0.000273388	0.000273447	0.000254677
1446.66	8.546	6.87337e-05	6.85127e-05	6.53556e-05	5.93115e-05	5.95642e-05	5.73589e-05	6.29817e-05	6.30006e-05	6.02711e-05
1455.08	8.546	3.63389e-06	3.34806e-06	2.9791e-06	2.54234e-06	2.35023e-06	2.06556e-06	2.87812e-06	2.65976e-06	2.36941e-06
1463.5	8.546	1.82157e-07	1.71975e-07	1.40397e-07	1.00777e-07	1.39638e-07	9.35125e-08	1.19268e-07	1.10661e-07	1.1951e-07
1471.91	8.546	1.08789e-05	1.00093e-05	8.29134e-06	1.10885e-05	1.02712e-05	8.54206e-06	1.09357e-05	1.01357e-05	8.42426e-06
1480.33	8.546	7.92865e-06	7.76444e-06	7.58818e-06	7.8617e-06	7.69086e-06	7.4927e-06	7.86043e-06	7.6738e-06	7.5266e-06
1488.75	8.546	1.04975e-06	9.80798e-07	9.28038e-07	8.84863e-07	8.53287e-07	8.029e-07	9.60911e-07	9.146e-07	8.63471e-07
1497.16	8.546	3.59268e-06	3.63985e-06	3.7233e-06	3.58304e-06	3.62627e-06	3.69902e-06	3.57678e-06	3.60985e-06	3.68825e-06
1505.58	8.546	1.41884e-07	1.34534e-07	1.29202e-07	1.20452e-07	1.23326e-07	1.29903e-07	1.2645e-07	1.15658e-07	1.4935e-07
1514	8.546	1.4682e-08	3.77335e-08	1.90398e-08	1.56038e-08	1.47445e-08	7.99615e-09	4.01215e-09	1.98231e-08	2.07349e-08
1522.41	8.546	1.5676e-06	1.56566e-06	1.56446e-06	1.27648e-06	1.27308e-06	1.27663e-06	1.369e-06	1.39048e-06	1.38543e-06
1530.83	8.546	2.17285e-05	2.18326e-05	2.20694e-05	2.09667e-05	2.10511e-05	2.12352e-05	2.11938e-05	2.12944e-05	2.15017e-05
1539.25	8.546	3.36715e-05	3.36527e-05	3.36166e-05	3.49211e-05	3.49214e-05	3.48865e-05	3.42051e-05	3.41875e-05	3.41619e-05
1547.66	8.546	3.80695e-06	3.77767e-06	3.77288e-06	3.44454e-06	3.44421e-06	3.42493e-06	3.56576e-06	3.55198e-06	3.54801e-06
1556.08	8.546	3.24237e-07	3.17197e-07	3.30347e-07	3.14357e-07	3.08493e-07	3.0588e-07	3.03975e-07	3.11964e-07	3.1817e-07
1564.5	8.546	6.54423e-06	6.5554e-06	6.5579e-06	5.28743e-06	5.30154e-06	5.3164e-06	5.80141e-06	5.80085e-06	5.80409e-06
1572.91	8.546	0.000210196	0.000210227	0.000210234	0.000213273	0.000213272	0.000213309	0.000210894	0.000210909	0.000210928
1581.33	8.546	0.000127238	0.000127163	0.000127044	0.00012665	0.000126589	0.000126482	0.00012629	0.000126234	0.00012611
1589.75	8.546	3.91028e-06	3.90599e-06	3.88082e-06	3.12518e-06	3.11127e-06	3.10223e-06	3.41768e-06	3.43097e-06	3.41286e-06
1598.16	8.546	8.65784e-05	8.66372e-05	8.68109e-05	8.46778e-05	8.47487e-05	8.48985e-05	8.5126e-05	8.51866e-05	8.53504e-05
1606.58	8.546	0.000176578	0.00017656	0.00017648	0.000183528	0.000183518	0.000183455	0.000179644	0.000179603	0.000179555
1615	8.546	6.91478e-05	6.91822e-05	6.92254e-05	6.43966e-05	6.4448e-05	6.44961e-05	6.61173e-05	6.61201e-05	6.62126e-05
1623.41	8.546	6.31449e-06	6.32705e-06	6.32088e-06	4.93667e-06	4.94469e-06	4.94295e-06	5.5285e-06	5.53474e-06	5.52939e-06
1631.83	8.546	4.1132e-06	4.1332e-06	4.12991e-06	4.11907e-06	4.13169e-06	4.11559e-06	4.09307e-06	4.10312e-06	4.10996e-06
1640.25	8.546	2.99592e-05	2.99731e-05	2.99425e-05	2.9984e-05	2.99857e-05	2.99637e-05	2.98323e-05	2.98403e-05	2.98248e-05
1648.66	8.546	2.88409e-05	2.8855e-05	2.8881e-05	2.97941e-05	2.98112e-05	2.98205e-05	2.92806e-05	2.92838e-05	2.9296e-05
1657.08	8.546	6.16069e-06	6.16252e-06	6.11846e-06	5.35003e-06	5.34267e-06	5.33866e-06	5.64048e-06	5.65827e-06	5.643e-06
1665.5	8.546	2.86251e-06	2.86194e-06	2.87017e-06	2.32811e-06	2.32625e-06	2.34068e-06	2.5525e-06	2.55916e-06	2.56245e-06
1673.91	8.546	7.30127e-07	7.19527e-07	7.35482e-07	6.18741e-07	6.38498e-07	6.31923e-07	6.62401e-07	6.68636e-07	6.86637e-07
1682.33	8.546	2.11356e-07	1.83018e-07	1.96952e-07	1.80369e-07	1.78542e-07	1.73294e-07	1.86828e-07	1.78714e-07	1.79586e-07
1690.75	8.546	5.18275e-08	5.47796e-08	5.2874e-08	5.90604e-08	3.49653e-08	5.98261e-08	7.42775e-08	4.06945e-08	3.76879e-08
1699.16	8.546	1.36105e-08	1.04075e-08	9.4722e-09	2.83356e-08	1.35359e-08	2.98586e-09	1.94144e-08	1.08477e-08	2.16219e-08
1707.58	8.546	3.03911e-08	1.28121e-08	3.37435e-08	1.92445e-08	2.04758e-08	1.73957e-08	1.76061e-08	5.3584e-08	4.59944e-08
1716	8.546	2.81932e-08	1.3693e-08	2.14234e-08	1.01726e-08	8.0302e-25	1.51047e-08	1.20053e-08	2.65533e-09	7.95091e-09
1724.41	8.546	3.03836e-08	1.60313e-08	2.32207e-08	2.07818e-08	0	6.14346e-09	8.44053e-09	0	1.08293e-08
1732.83	8.546	0	8.20688e-09	0	0	0	0	-3.44314e-25	0	0
1741.25	8.546	0	9.63164e-09	7.68093e-09	0	0	0	0	0	0
1749.66	8.546	3.64842e-08	3.91421e-08	4.15137e-08	2.33455e-08	2.53571e-08	2.68011e-08	2.80815e-08	3.16526e-08	3.43823e-08
1758.08	8.546	2.98511e-07	3.08161e-07	3.11898e-07	2.20087e-07	2.08083e-07	2.05805e-07	2.49242e-07	2.60805e-07	2.67861e-07
1766.5	8.546	1.76888e-07	1.73311e-07	2.1744e-07	1.11173e-07	1.06895e-07	9.63444e-08	1.13462e-07	1.1467e-07	1.05945e-07
1774.91	8.546	3.411e-08	3.3753e-08	5.54942e-08	3.23547e-08	2.76982e-08	4.32678e-09	2.63244e-09	1.38888e-08	2.19891e-08
1783.33	8.546	1.21325e-07	1.29755e-07	8.20524e-08	8.63497e-08	8.7255e-08	6.87785e-08	9.92683e-08	8.82763e-08	1.07717e-07
1791.75	8.546	2.1979e-07	1.81949e-07	2.80679e-07	1.37898e-07	1.51044e-07	1.38656e-07	1.75292e-07	1.41572e-07	1.5596e-07
1800.16	8.546	1.10136e-07	1.08438e-07	1.63895e-07	7.92677e-08	2.78626e-08	5.76664e-08	9.78666e-08	9.27973e-08	7.05971e-08
1808.58	8.546	2.82529e-08	3.84635e-08	1.183e-07	1.05062e-08	7.33305e-08	5.39305e-10	2.23236e-08	5.80781e-08	1.28378e-08
1817	8.546	5.86185e-08	0	6.50174e-09	3.18001e-08	0	0	5.09837e-08	1.01548e-07	0
1825.41	8.546	0	1.83201e-09	1.99107e-08	0	0	0	0	0	0
1833.83	8.546	0	0	0	0	0	0	0	0	0
1842.25	8.546	0	0	0	0	0	0	0	0	0
1850.66	8.546	0	0	0	0	0	0	0	0	0
1859.08	8.546	0	0	0	0	6.24327e-09	1.01322e-09	0	0	0
1867.5	8.546	4.57565e-08	3.08277e-08	1.38454e-07	2.56546e-07	1.95604e-08	1.4793e-07	2.51217e-08	2.3799e-08	7.25546e-08
1875.91	8.546	2.34466e-05	1.98299e-05	9.08939e-06	2.41437e-05	2.06969e-05	7.20646e-06	2.38433e-05	2.01356e-05	8.33241e-06
1884.33	8.546	5.12371e-05	4.51923e-05	2.60656e-05	5.12475e-05	4.46113e-05	2.23051e-05	5.10193e-05	4.46937e-05	2.41951e-05
1892.75	8.546	7.04015e-06	5.57355e-06	3.0692e-06	6.38215e-06	5.1275e-06	2.32458e-06	6.62064e-06	5.21746e-06	2.68567e-06
1901.16	8.546	1.77691e-06	1.53738e-06	3.26132e-07	1.47747e-06	1.20345e-06	2.66164e-07	1.47166e-06	1.35427e-06	2.57847e-07
1909.58	8.546	1.44276e-06	1.10966e-06	2.68528e-07	1.16331e-06	9.84092e-07	1.92005e-07	1.11004e-06	1.01176e-06	3.7693e-07
1918	8.546	7.30693e-07	6.04778e-07	3.32892e-07	5.48807e-07	4.26836e-07	1.77482e-07	5.79287e-07	5.45585e-07	2.19603e-07
1926.41	8.546	6.06724e-07	5.66193e-07	3.46917e-07	4.29447e-07	4.45227e-07	1.99809e-07	4.97619e-07	4.74651e-07	2.47638e-07
1934.83	8.546	8.0288e-06	7.6556e-06	6.11174e-06	5.33477e-06	5.2832e-06	4.72314e-06	6.28752e-06	6.06161e-06	5.07458e-06
1943.25	8.546	0.000296957	0.000314636	0.000322899	0.000248255	0.00026291	0.000274168	0.00026811	0.000283832	0.000293217
1951.66	8.546	0.00107315	0.00108111	0.0010617	0.00102959	0.00104982	0.00106171	0.00104484	0.00105881	0.00105384
1960.08	8.546	0.00116705	0.00112224	0.001061	0.00118174	0.00113724	0.00107947	0.00116841	0.00112371	0.0010626
1968.5	8.546	0.000876105	0.000872519	0.000864671	0.000888339	0.000886774	0.000881947	0.000878388	0.000875725	0.000868943
1976.91	8.546	0.000226508	0.000230484	0.000230321	0.000212091	0.000216817	0.000218596	0.000217735	0.000222083	0.000222962
1985.33	8.546	4.08739e-05	4.06062e-05	4.02389e-05	3.589e-05	3.56171e-05	3.53071e-05	3.77574e-05	3.75092e-05	3.71125e-05
1993.75	8.546	0.000193589	0.000192515	0.000191616	0.000176971	0.000176325	0.000175939	0.000183473	0.000182662	0.000182042
2002.16	8.546	0.00265213	0.00264103	0.00262243	0.00261083	0.00260097	0.00258485	0.00262062	0.00260993	0.00259225
2010.58	8.546	0.00274675	0.00273567	0.00271755	0.00278877	0.00277845	0.00276201	0.00275866	0.00274801	0.00273047
2019	8.546	0.00187519	0.0018671	0.00185279	0.00181019	0.00180194	0.00178792	0.00183156	0.0018232	0.00180894
2027.41	8.546	0.000574536	0.000577859	0.000582516	0.000497221	0.000499732	0.000503135	0.000528729	0.00053156	0.000535585
2035.83	8.546	0.000283148	0.000282035	0.000280612	0.0002629	0.000262099	0.000260914	0.000270041	0.000269068	0.000267758
2044.25	8.546	0.000369215	0.000370588	0.000373271	0.000362299	0.000363274	0.000365179	0.000363716	0.000364884	0.000367202
2052.66	8.546	0.00104191	0.00104092	0.0010391	0.00106241	0.00106138	0.00105954	0.00104869	0.00104764	0.00104582
2061.08	8.546	0.000703034	0.000703712	0.000704543	0.000738353	0.000739535	0.000741362	0.000718868	0.000719754	0.000720961
2069.49	8.546	0.000789173	0.000789178	0.000789162	0.0007747	0.000774561	0.000774319	0.000777323	0.000777282	0.000777214
2077.91	8.546	0.00044375	0.000441959	0.000438827	0.000406861	0.00040516	0.0004021	0.000421658	0.000419926	0.000416855
2086.33	8.546	0.000328251	0.000328124	0.000327844	0.000289428	0.000289368	0.00028925	0.000304896	0.000304801	0.000304628
2094.74	8.546	0.00013705	0.00013723	0.000137395	0.000115694	0.000115786	0.00011592	0.00012408	0.000124217	0.000124325
2103.16	8.546	4.73188e-05	4.70677e-05	4.66549e-05	4.19683e-05	4.16986e-05	4.12698e-05	4.38436e-05	4.36274e-05	4.31671e-05
2111.58	8.546	3.09841e-05	3.09044e-05	3.07032e-05	2.95803e-05	2.94825e-05	2.92528e-05	2.989e-05	2.97763e-05	2.9621e-05
2119.99	8.546	1.07079e-05	1.06512e-05	1.05153e-05	9.2771e-06	9.2256e-06	9.11653e-06	9.67117e-06	9.66392e-06	9.52353e-06
2128.41	8.546	2.81197e-06	2.79557e-06	2.81217e-06	2.18669e-06	2.20855e-06	2.19154e-06	2.59647e-06	2.60344e-06	2.60796e-06
2136.83	8.546	1.95643e-06	1.93923e-06	1.92508e-06	1.63389e-06	1.67361e-06	1.65395e-06	1.72933e-06	1.72696e-06	1.74585e-06
2145.24	8.546	9.36889e-06	9.33854e-06	9.33308e-06	9.04444e-06	9.02037e-06	9.00979e-06	9.12381e-06	9.09356e-06	9.09363e-06
2153.66	8.546	1.26681e-05	1.26484e-05	1.25373e-05	1.33237e-05	1.32919e-05	1.31628e-05	1.29843e-05	1.29364e-05	1.28362e-05
2162.08	8.546	1.41231e-05	1.40811e-05	1.40763e-05	1.41249e-05	1.41527e-05	1.41363e-05	1.40672e-05	1.40446e-05	1.40527e-05
2170.49	8.546	6.62148e-06	6.64525e-06	6.68407e-06	6.37818e-06	6.38196e-06	6.40128e-06	6.47973e-06	6.4887e-06	6.5013e-06
2178.91	8.546	1.36624e-06	1.38731e-06	1.36162e-06	1.24642e-06	1.25346e-06	1.24902e-06	1.31461e-06	1.30235e-06	1.33864e-06
2187.33	8.546	9.4206e-07	9.73419e-07	1.00411e-06	9.22084e-07	9.03474e-07	9.26758e-07	9.28271e-07	9.19756e-07	9.63334e-07
2195.74	8.546	4.27537e-07	4.82718e-07	4.77442e-07	3.56846e-07	3.88841e-07	3.54541e-07	4.06429e-07	3.61192e-07	4.2713e-07
2204.16	8.546	6.70108e-08	6.20613e-08	9.23908e-08	6.94669e-08	1.90449e-08	7.95527e-08	5.3307e-08	8.58841e-08	9.13221e-08
2212.58	8.546	3.53264e-07	3.31821e-07	3.55198e-07	3.44151e-07	3.31187e-07	3.37046e-07	3.0779e-07	3.56778e-07	3.21761e-07
2220.99	8.546	2.07716e-07	2.171e-07	1.47187e-07	1.99506e-07	1.86638e-07	1.63989e-07	1.57767e-07	2.20065e-07	2.34459e-07
2229.41	8.546	1.02837e-07	1.82773e-07	1.38398e-07	9.78803e-08	1.13049e-07	1.36702e-07	1.47163e-07	1.25434e-07	6.70296e-08
2237.83	8.546	6.41641e-08	1.70477e-08	1.90728e-08	9.02339e-09	5.25053e-08	2.72545e-08	4.60126e-08	1.84359e-08	2.65743e-08
2246.24	8.546	8.81148e-08	6.02403e-08	8.46523e-08	7.35345e-08	8.87183e-08	6.49702e-08	5.51769e-08	7.25912e-08	4.17317e-08
2254.66	8.546	2.00266e-07	2.06641e-07	1.87802e-07	2.10064e-07	2.44904e-07	2.08442e-07	2.16606e-07	2.08933e-07	2.34771e-07
2263.08	8.546	3.90189e-08	1.08898e-07	6.72164e-08	7.91334e-08	4.60163e-08	1.09725e-07	7.03429e-08	4.95248e-08	7.57752e-08
2271.49	8.546	6.75181e-08	7.46632e-08	5.12299e-08	3.82038e-08	1.39703e-08	5.28442e-08	8.90342e-08	2.82691e-08	6.16812e-08
2279.91	8.546	2.50852e-08	9.64859e-08	6.84188e-08	6.77359e-08	3.17926e-08	3.38685e-08	1.68011e-08	9.64065e-08	8.63907e-08
2288.33	8.546	1.73131e-08	1.08833e-08	3.33662e-08	1.87646e-08	0	4.06436e-08	6.32077e-08	0	5.43263e-08
2296.74	8.546	1.99928e-08	0	2.97908e-08	1.22092e-08	9.96389e-09	0	0	0	1.1975e-08
2305.16	8.546	0	0	0	2.54942e-08	0	2.55415e-08	0	0	1.70248e-08
2313.58	8.546	0	0	0	0	1.79279e-08	0	0	0	2.87305e-08
2321.99	8.546	0	0	0	0	1.34135e-08	0	0	0	0
2330.41	8.546	0	0	0	0	0	0	0	0	0
2338.83	8.546	0	0	0	0	0	0	0	0	0
2347.24	8.546	1.34361e-08	0	0	0	0	0	0	0	0
2355.66	8.546	0	0	0	0	0	0	9.33472e-09	0	0
2364.08	8.546	0	0	0	0	0	0	0	0	0
2372.49	8.546	0	6.16965e-08	0	0	0	0	0	0	0
2380.91	8.546	0	0	0	0	0	0	0	0	0
2389.33	8.546	0	0	0	0	0	0	0	0	0
2397.74	8.546	0	0	3.02219e-09	0	0	0	0	0	0
2406.16	8.546	0	0	0	1.37246e-08	0	3.49457e-08	2.19646e-08	0	0
2414.58	8.546	0	0	0	1.39362e-08	0	0	0	0	5.23145e-10
2422.99	8.546	0	9.77515e-24	3.18972e-09	2.0044e-08	0	0	0	0	0
2431.41	8.546	0	0	0	0	0	1.57006e-08	0	0	4.89768e-08
2439.83	8.546	2.2181e-08	0	0	0	0	2.35544e-08	2.36116e-08	1.00334e-09	0
2448.24	8.546	0	2.50281e-25	0	3.25306e-08	0	5.66022e-08	3.19139e-08	6.87723e-08	0
2456.66	8.546	0	4.32026e-08	0	0	0	4.71655e-08	3.36865e-08	6.03679e-08	0
2465.08	8.546	4.57945e-08	7.60338e-08	7.99841e-08	0	3.93336e-09	5.18388e-08	2.31298e-08	0	0
2473.49	8.546	1.04155e-07	1.64271e-07	5.88095e-09	1.35423e-07	7.0925e-08	2.15782e-07	7.37466e-08	1.64464e-07	1.23272e-08
2481.91	8.546	2.67874e-06	2.43816e-06	2.10885e-06	1.89114e-06	1.64808e-06	1.38933e-06	2.12069e-06	1.99768e-06	1.65425e-06
2490.33	8.546	3.9734e-06	4.07435e-06	4.433e-06	3.31089e-06	3.33461e-06	3.52455e-06	3.57653e-06	3.69107e-06	3.91772e-06
2498.74	8.546	2.03967e-06	1.94623e-06	2.07776e-06	1.90476e-06	1.89441e-06	1.88872e-06	1.80675e-06	1.82781e-06	1.84481e-06
2507.16	8.546	1.12007e-06	1.05873e-06	1.01336e-06	9.29275e-07	1.05344e-06	8.9989e-07	1.15267e-06	9.28759e-07	9.13407e-07
2515.58	8.546	1.90911e-06	2.16358e-06	2.17229e-06	1.58499e-06	1.58029e-06	1.8851e-06	1.6837e-06	1.99905e-06	2.01149e-06

## Sheet: k_GF5A
Wavelength	FWHM	k_Summer_L	k_Summer_M	k_Summer_H	k_Winter_L	k_Winter_M	k_Winter_H	k_1976_L	k_1976_M	k_1976_H
1014.15	8.25	0	0	0	0	0	0	0	0	0
1022.56	8.25	0	0	0	0	0	0	0	0	0
1030.98	8.25	0	0	0	0	0	0	0	0	0
1039.4	8.25	6.27457e-07	6.19801e-07	6.17952e-07	6.23161e-07	6.34093e-07	6.41323e-07	6.24197e-07	6.29717e-07	6.26058e-07
1047.81	8.25	9.44739e-07	9.40855e-07	9.41894e-07	9.72981e-07	9.77895e-07	9.72067e-07	9.43753e-07	9.39718e-07	9.42957e-07
1056.23	8.25	5.16178e-07	5.20245e-07	5.06509e-07	4.9917e-07	4.88726e-07	4.89823e-07	5.03754e-07	5.00844e-07	4.99665e-07
1064.65	8.25	3.20923e-07	3.06424e-07	3.10142e-07	3.25592e-07	3.16344e-07	3.21429e-07	3.14828e-07	3.22824e-07	3.07463e-07
1073.06	8.25	4.67614e-08	5.34944e-08	5.73353e-08	3.08167e-08	3.44908e-08	4.87829e-08	5.0879e-08	3.54148e-08	4.03573e-08
1081.48	8.25	7.01145e-09	4.52696e-09	6.26891e-09	1.05178e-08	8.13779e-10	4.68131e-09	1.75818e-09	1.03318e-08	1.01944e-08
1089.9	8.25	1.64684e-09	0	2.08335e-09	0	0	-1.83615e-09	1.34931e-09	0	0
1098.31	8.25	0	2.66044e-09	0	0	2.29555e-09	0	0	1.90481e-09	0
1106.73	8.25	0	0	0	0	0	0	0	0	0
1115.15	8.25	1.75169e-09	0	5.40308e-09	2.80671e-09	0	3.92541e-24	0	0	0
1123.56	8.25	0	0	0	0	0	0	0	0	0
1131.98	8.25	0	0	0	2.16106e-09	0	0	0	0	0
1140.4	8.25	0	0	0	0	0	0	0	0	0
1148.81	8.25	0	0	0	0	0	0	0	0	0
1157.23	8.25	0	0	0	0	0	0	0	0	0
1165.65	8.25	0	0	0	0	0	0	0	0	0
1174.06	8.25	0	0	0	0	0	0	0	3.92299e-09	0
1182.48	8.25	0	0	0	0	0	0	0	0	0
1190.9	8.25	0	0	0	0	0	0	1.61051e-09	0	0
1199.31	8.25	6.66042e-07	6.34667e-07	5.79795e-07	6.03564e-07	5.81689e-07	5.3614e-07	6.31265e-07	5.99356e-07	5.56253e-07
1207.73	8.25	3.78681e-05	3.71461e-05	3.63586e-05	3.85345e-05	3.78099e-05	3.70112e-05	3.8045e-05	3.73206e-05	3.65298e-05
1216.15	8.25	1.4634e-05	1.47789e-05	1.50123e-05	1.45304e-05	1.46736e-05	1.49337e-05	1.45189e-05	1.46637e-05	1.49171e-05
1224.56	8.25	1.60832e-05	1.62019e-05	1.6379e-05	1.61518e-05	1.62541e-05	1.64282e-05	1.60309e-05	1.61306e-05	1.62968e-05
1232.98	8.25	1.73021e-06	1.73091e-06	1.72609e-06	1.52959e-06	1.54365e-06	1.53576e-06	1.62116e-06	1.61921e-06	1.61748e-06
1241.4	8.25	3.98555e-07	3.86064e-07	3.92661e-07	3.70638e-07	3.6808e-07	3.7077e-07	3.72112e-07	3.79017e-07	3.73802e-07
1249.81	8.25	1.49765e-07	1.54798e-07	1.49241e-07	1.59413e-07	1.54693e-07	1.49586e-07	1.54068e-07	1.52367e-07	1.52337e-07
1258.23	8.25	2.09972e-07	1.93467e-07	2.09674e-07	1.89952e-07	2.02509e-07	2.15813e-07	2.0957e-07	2.00881e-07	1.87602e-07
1266.65	8.25	2.08986e-07	2.27194e-07	2.16514e-07	2.33171e-07	2.24563e-07	2.26969e-07	2.29914e-07	2.08596e-07	2.03487e-07
1275.06	8.25	2.49035e-09	0	0	0	0	2.73558e-09	0	0	0
1283.48	8.25	8.29215e-08	7.15552e-08	7.44422e-08	6.35424e-08	5.42296e-08	6.97233e-08	6.48833e-08	5.56477e-08	5.50834e-08
1291.9	8.25	2.37863e-06	2.38233e-06	2.39372e-06	2.4135e-06	2.41972e-06	2.42514e-06	2.37707e-06	2.38144e-06	2.39814e-06
1300.31	8.25	3.14894e-07	3.1524e-07	3.35935e-07	3.13051e-07	2.99014e-07	2.98676e-07	3.16678e-07	3.02715e-07	3.26861e-07
1308.73	8.25	1.51869e-07	1.67171e-07	1.39326e-07	1.42058e-07	1.38943e-07	1.37647e-07	1.55744e-07	1.49099e-07	1.38346e-07
1317.15	8.25	8.61543e-06	8.61504e-06	8.59008e-06	8.8364e-06	8.86611e-06	8.853e-06	8.69302e-06	8.72672e-06	8.69467e-06
1325.56	8.25	7.76198e-07	8.16573e-07	8.12425e-07	6.66172e-07	7.0632e-07	7.37201e-07	6.92149e-07	7.39121e-07	7.54104e-07
1333.98	8.25	1.13007e-06	1.10103e-06	1.0694e-06	1.08229e-06	1.04743e-06	1.01562e-06	1.09463e-06	1.0682e-06	1.03965e-06
1342.4	8.25	2.98345e-06	3.06231e-06	3.10548e-06	3.0577e-06	3.20294e-06	3.24001e-06	3.01339e-06	3.1218e-06	3.13561e-06
1350.81	8.25	3.26076e-07	2.3635e-07	3.39615e-07	2.49966e-07	3.29554e-07	3.37158e-07	2.89923e-07	3.45469e-07	4.42201e-07
1359.23	8.25	7.84117e-09	4.92669e-08	0	5.47895e-08	1.10914e-08	6.34955e-09	3.16577e-08	5.84138e-08	0
1367.65	8.25	1.88573e-07	1.0683e-07	3.54814e-08	1.53512e-07	6.82074e-08	4.75213e-08	2.3103e-07	1.20346e-07	3.88997e-08
1376.06	8.25	2.50523e-07	2.1923e-07	1.07985e-07	2.4119e-07	2.26616e-07	7.44245e-08	2.4496e-07	2.1459e-07	7.74838e-08
1384.48	8.25	2.75446e-08	8.23384e-09	2.92384e-09	0	9.68843e-09	0	6.26644e-08	1.16936e-08	-8.89614e-09
1392.9	8.25	1.60745e-10	0	0	9.83645e-10	0	0	0	0	0
1401.31	8.25	0	0	0	2.75757e-08	0	0	0	0	7.87804e-09
1409.73	8.25	0	0	-4.78088e-09	0	0	0	0	0	0
1418.15	8.25	0	1.83823e-08	0	9.04396e-09	0	1.82087e-08	6.73323e-09	0	7.99209e-10
1426.56	8.25	1.58085e-06	2.3502e-06	3.61606e-06	1.41322e-06	2.19023e-06	3.20812e-06	1.43803e-06	2.21667e-06	3.35187e-06
1434.98	8.25	0.000344029	0.000325121	0.000291026	0.000358986	0.000340326	0.000308773	0.000350571	0.000331597	0.000297631
1443.4	8.25	0.000143	0.000144523	0.000146145	0.000132792	0.000134515	0.000138119	0.000136488	0.000138028	0.000140285
1451.81	8.25	1.33724e-05	1.35034e-05	1.35019e-05	1.035e-05	1.05277e-05	1.05972e-05	1.14218e-05	1.15694e-05	1.15846e-05
1460.23	8.25	5.82947e-07	5.82304e-07	5.57686e-07	3.80548e-07	4.30885e-07	3.8787e-07	4.48834e-07	4.79787e-07	4.92229e-07
1468.65	8.25	4.39496e-06	3.98899e-06	3.17448e-06	4.33662e-06	4.01657e-06	3.22219e-06	4.33211e-06	3.95172e-06	3.21173e-06
1477.06	8.25	1.02282e-05	9.68101e-06	8.95723e-06	1.05164e-05	9.99433e-06	9.31021e-06	1.03378e-05	9.83741e-06	9.1415e-06
1485.48	8.25	1.98595e-06	1.95399e-06	1.93341e-06	1.76511e-06	1.75461e-06	1.70992e-06	1.87219e-06	1.81867e-06	1.80812e-06
1493.9	8.25	3.12522e-06	3.21988e-06	3.40677e-06	3.09751e-06	3.19309e-06	3.36279e-06	3.11059e-06	3.19045e-06	3.38619e-06
1502.31	8.25	6.32569e-07	6.28527e-07	6.46952e-07	5.75672e-07	5.86217e-07	5.95274e-07	5.86068e-07	5.8753e-07	6.1642e-07
1510.73	8.25	1.3684e-08	2.04656e-08	1.99563e-08	1.99739e-08	1.111e-08	1.08216e-08	1.50452e-08	2.47213e-08	2.85304e-08
1519.15	8.25	1.4596e-07	1.46031e-07	1.33817e-07	1.10063e-07	8.7089e-08	1.09203e-07	9.51245e-08	1.06884e-07	1.02332e-07
1527.56	8.25	7.00567e-06	6.99308e-06	7.01466e-06	6.26528e-06	6.27715e-06	6.26746e-06	6.52137e-06	6.52581e-06	6.5302e-06
1535.98	8.25	3.80668e-05	3.80617e-05	3.8054e-05	3.8904e-05	3.88896e-05	3.88557e-05	3.83414e-05	3.83267e-05	3.83199e-05
1544.4	8.25	1.72333e-05	1.72082e-05	1.72159e-05	1.70004e-05	1.70161e-05	1.70131e-05	1.70201e-05	1.70051e-05	1.70223e-05
1552.81	8.25	3.18171e-07	3.06739e-07	3.12693e-07	2.74454e-07	2.77251e-07	2.68396e-07	2.8434e-07	2.86216e-07	2.94364e-07
1561.23	8.25	4.28158e-07	4.25971e-07	4.34244e-07	4.02293e-07	4.16633e-07	4.15955e-07	4.22899e-07	4.17722e-07	4.17186e-07
1569.65	8.25	0.000155536	0.000155599	0.000155703	0.000152311	0.000152348	0.000152476	0.000152972	0.000153036	0.000153145
1578.06	8.25	0.000168389	0.000168348	0.000168298	0.000172211	0.000172166	0.000172111	0.000169717	0.000169688	0.000169617
1586.48	8.25	2.4253e-05	2.42293e-05	2.41611e-05	2.18407e-05	2.18113e-05	2.1768e-05	2.27419e-05	2.2737e-05	2.26743e-05
1594.9	8.25	1.10101e-05	1.10047e-05	1.10316e-05	9.7049e-06	9.70257e-06	9.70848e-06	1.01854e-05	1.01934e-05	1.0211e-05
1603.31	8.25	0.000194759	0.000194756	0.000194782	0.000201993	0.00020202	0.000202047	0.000197946	0.000197954	0.000197983
1611.73	8.25	0.000140404	0.000140387	0.000140322	0.000139316	0.000139313	0.000139261	0.000139166	0.000139117	0.000139099
1620.15	8.25	1.66713e-05	1.66907e-05	1.66519e-05	1.34833e-05	1.34925e-05	1.3478e-05	1.47632e-05	1.47539e-05	1.47463e-05
1628.56	8.25	4.19329e-06	4.20518e-06	4.21881e-06	4.01795e-06	4.03138e-06	4.0175e-06	4.07805e-06	4.07755e-06	4.08724e-06
1636.98	8.25	1.19049e-05	1.18957e-05	1.18687e-05	1.13874e-05	1.13955e-05	1.13426e-05	1.15482e-05	1.1548e-05	1.15328e-05
1645.4	8.25	3.23903e-05	3.24256e-05	3.24544e-05	3.38514e-05	3.38664e-05	3.39166e-05	3.31005e-05	3.31178e-05	3.31569e-05
1653.81	8.25	1.548e-05	1.54852e-05	1.54457e-05	1.47798e-05	1.47652e-05	1.4745e-05	1.50355e-05	1.50415e-05	1.5006e-05
1662.23	8.25	2.90334e-06	2.90474e-06	2.90237e-06	2.50209e-06	2.49691e-06	2.50627e-06	2.59567e-06	2.59325e-06	2.60392e-06
1670.65	8.25	1.25157e-06	1.2531e-06	1.26579e-06	1.02456e-06	1.03612e-06	1.03846e-06	1.11017e-06	1.11068e-06	1.12968e-06
1679.06	8.25	3.11516e-07	2.79728e-07	2.96966e-07	2.58789e-07	2.60232e-07	2.53319e-07	2.68151e-07	2.68705e-07	2.64472e-07
1687.48	8.25	9.65726e-08	9.50157e-08	1.07024e-07	1.10771e-07	8.82254e-08	1.0168e-07	1.15905e-07	8.75024e-08	9.51521e-08
1695.9	8.25	1.22307e-08	3.33449e-08	1.18109e-08	4.33611e-08	1.56399e-08	1.46147e-08	1.81992e-08	1.34223e-08	1.04287e-08
1704.31	8.25	1.59864e-08	9.04521e-09	2.83784e-08	1.02685e-08	1.0946e-08	1.16924e-08	1.61303e-08	3.13913e-08	3.21553e-08
1712.73	8.25	4.56584e-08	2.04399e-08	1.78658e-08	1.84368e-08	1.12593e-08	1.62949e-08	2.23501e-08	3.40271e-08	3.30734e-08
1721.15	8.25	2.40832e-08	9.23949e-09	3.80848e-08	3.37323e-08	1.45905e-24	2.0667e-08	6.68758e-09	0	2.44577e-08
1729.56	8.25	7.49718e-09	2.09456e-08	7.77827e-09	0	0	0	1.45246e-24	0	2.76231e-24
1737.98	8.25	0	9.31639e-09	1.20259e-08	0	0	0	0	0	0
1746.4	8.25	0	0	0	0	0	0	0	0	0
1754.81	8.25	3.0732e-07	3.1952e-07	3.10572e-07	2.21607e-07	2.15544e-07	2.16972e-07	2.61562e-07	2.59078e-07	2.75335e-07
1763.23	8.25	2.53957e-07	2.57824e-07	2.87081e-07	1.54897e-07	1.86671e-07	1.5788e-07	1.87081e-07	1.95255e-07	1.79287e-07
1771.65	8.25	5.99298e-08	6.08285e-08	8.27466e-08	5.7611e-08	2.764e-08	2.08435e-08	2.11393e-08	4.73777e-08	1.9405e-08
1780.06	8.25	0	4.16597e-09	9.59356e-09	4.54292e-09	9.24922e-09	0	4.4645e-09	0	5.02073e-08
1788.48	8.25	3.28569e-07	3.33008e-07	3.27337e-07	2.12387e-07	2.60789e-07	2.10479e-07	2.60383e-07	2.55236e-07	2.53547e-07
1796.9	8.25	1.42543e-07	1.09656e-07	1.73761e-07	9.99307e-08	4.08254e-08	1.03082e-07	1.3232e-07	1.00029e-07	8.53176e-08
1805.31	8.25	5.14535e-08	5.86576e-08	1.8278e-07	2.63889e-08	8.04487e-08	5.54176e-10	4.68258e-08	9.03862e-08	2.92571e-08
1813.73	8.25	6.77027e-08	0	6.95054e-09	2.31192e-08	0	1.84996e-23	4.66697e-08	1.07352e-07	0
1822.15	8.25	4.35543e-11	2.20085e-09	1.61723e-08	0	0	0	0	0	0
1830.56	8.25	0	0	0	0	0	0	0	0	0
1838.98	8.25	0	0	0	0	0	0	0	0	0
1847.4	8.25	0	0	0	0	0	0	0	0	0
1855.82	8.25	0	0	0	0	0	0	0	0	0
1864.23	8.25	1.59884e-08	3.15052e-10	6.66282e-08	1.91165e-07	6.39258e-09	7.87483e-08	6.8716e-09	0	1.00043e-08
1872.65	8.25	1.15645e-05	4.01329e-06	2.66157e-06	1.08937e-05	3.18878e-06	1.9382e-06	1.10659e-05	3.61999e-06	2.37917e-06
1881.07	8.25	6.36327e-05	6.06869e-05	3.26545e-05	6.49861e-05	6.20465e-05	2.79579e-05	6.40896e-05	6.09658e-05	3.04712e-05
1889.48	8.25	1.57495e-05	1.52535e-05	8.36435e-06	1.54115e-05	1.52544e-05	7.57348e-06	1.54815e-05	1.50408e-05	7.80719e-06
1897.9	8.25	3.23479e-06	3.32896e-06	1.41722e-06	2.85533e-06	2.84619e-06	1.01535e-06	2.9162e-06	2.99838e-06	1.18987e-06
1906.32	8.25	1.39659e-06	1.06254e-06	2.39361e-07	1.11454e-06	9.30255e-07	2.05567e-07	1.05694e-06	9.75821e-07	3.14222e-07
1914.73	8.25	6.85109e-07	5.0899e-07	2.50867e-07	5.84653e-07	3.53912e-07	1.71398e-07	5.9613e-07	4.76474e-07	1.97198e-07
1923.15	8.25	7.92151e-07	6.99784e-07	3.98763e-07	4.94789e-07	5.28651e-07	2.15774e-07	6.46622e-07	5.6191e-07	2.72903e-07
1931.57	8.25	2.20864e-06	3.22971e-06	3.99865e-06	1.58647e-06	2.30785e-06	3.2179e-06	1.72716e-06	2.52651e-06	3.34468e-06
1939.98	8.25	0.000116221	0.000156327	0.000199314	8.56358e-05	0.00011311	0.000148128	9.78583e-05	0.000130458	0.000168949
1948.4	8.25	0.000743749	0.00075711	0.000767081	0.00068315	0.000699951	0.000720154	0.000707543	0.000722618	0.000737406
1956.82	8.25	0.00159298	0.00153623	0.00140932	0.00161936	0.00157457	0.00148093	0.00159878	0.00154811	0.00143472
1965.23	8.25	0.00114792	0.00113163	0.00111097	0.00118801	0.00117303	0.00115447	0.00116294	0.00114724	0.00112666
1973.65	8.25	0.000381439	0.00038298	0.000385573	0.000370088	0.000371745	0.000375627	0.000373725	0.00037538	0.000378546
1982.07	8.25	7.07325e-05	6.89092e-05	6.53896e-05	6.07265e-05	5.92314e-05	5.64033e-05	6.4703e-05	6.30527e-05	5.99076e-05
1990.48	8.25	5.14271e-05	5.13972e-05	5.12129e-05	4.64047e-05	4.63251e-05	4.61878e-05	4.81916e-05	4.81578e-05	4.79226e-05
1998.9	8.25	0.00110724	0.00111787	0.00113746	0.00105013	0.00106128	0.00108096	0.00107298	0.00108396	0.0011037
2007.32	8.25	0.00287726	0.00283823	0.00277646	0.00289877	0.00286324	0.00280747	0.00287955	0.00284236	0.00278306
2015.73	8.25	0.00276826	0.00277431	0.0027805	0.00278284	0.00278768	0.00279382	0.00276148	0.00276685	0.00277282
2024.15	8.25	0.000887989	0.000889978	0.000890922	0.000795906	0.000797155	0.000797337	0.000833009	0.000834475	0.000835066
2032.57	8.25	0.000331123	0.000330057	0.000328676	0.000290275	0.000289711	0.000288898	0.000306164	0.000305395	0.0003043
2040.98	8.25	0.000303278	0.000302678	0.000301789	0.000303495	0.000303022	0.000302186	0.000301934	0.000301343	0.000300546
2049.4	8.25	0.000733069	0.000731188	0.000727309	0.000726115	0.000724582	0.000721506	0.00072638	0.000724722	0.000721234
2057.82	8.25	0.000850281	0.000851363	0.000853064	0.000890061	0.00089163	0.000894357	0.000868056	0.000869272	0.000871376
2066.23	8.25	0.000900669	0.000901478	0.00090336	0.000925999	0.000926704	0.000928369	0.00090975	0.000910541	0.000912356
2074.65	8.25	0.000611833	0.000611236	0.000610103	0.000571841	0.000571303	0.000570247	0.000587539	0.000586989	0.000585914
2083.07	8.25	0.000332496	0.000332299	0.000332006	0.000297096	0.000296975	0.000296791	0.000311026	0.000310851	0.000310644
2091.48	8.25	0.000206115	0.000206211	0.000206234	0.000175417	0.000175532	0.000175679	0.000187588	0.000187718	0.000187785
2099.9	8.25	7.11482e-05	7.10321e-05	7.08379e-05	6.25171e-05	6.23397e-05	6.20646e-05	6.56875e-05	6.55488e-05	6.5266e-05
2108.32	8.25	2.81372e-05	2.80532e-05	2.78978e-05	2.58239e-05	2.57144e-05	2.55309e-05	2.64974e-05	2.64002e-05	2.62495e-05
2116.73	8.25	1.93477e-05	1.93971e-05	1.94217e-05	1.77299e-05	1.77834e-05	1.78321e-05	1.81729e-05	1.82356e-05	1.82921e-05
2125.15	8.25	3.7047e-06	3.72144e-06	3.73511e-06	2.72646e-06	2.78072e-06	2.7772e-06	3.21837e-06	3.26108e-06	3.27385e-06
2133.57	8.25	1.96499e-06	1.94002e-06	1.94725e-06	1.77496e-06	1.77518e-06	1.77126e-06	1.8686e-06	1.89197e-06	1.90476e-06
2141.98	8.25	2.61555e-06	2.6091e-06	2.6208e-06	2.41713e-06	2.43707e-06	2.39327e-06	2.44201e-06	2.42751e-06	2.44208e-06
2150.4	8.25	1.9719e-05	1.97519e-05	1.98199e-05	2.01794e-05	2.02022e-05	2.02732e-05	1.98877e-05	1.99333e-05	1.99881e-05
2158.82	8.25	1.16957e-05	1.16565e-05	1.15848e-05	1.19729e-05	1.19571e-05	1.18917e-05	1.1804e-05	1.17267e-05	1.17123e-05
2167.23	8.25	9.50047e-06	9.49896e-06	9.50104e-06	9.22876e-06	9.2235e-06	9.23824e-06	9.32869e-06	9.31808e-06	9.31103e-06
2175.65	8.25	2.7283e-06	2.76747e-06	2.77344e-06	2.6046e-06	2.62813e-06	2.63901e-06	2.70988e-06	2.68811e-06	2.71499e-06
2184.07	8.25	7.23956e-07	7.13788e-07	7.04233e-07	6.4707e-07	6.20013e-07	6.33091e-07	6.6322e-07	6.56649e-07	6.91024e-07
2192.48	8.25	7.79567e-07	8.22029e-07	8.57043e-07	7.36652e-07	7.38608e-07	7.19741e-07	7.63943e-07	7.18141e-07	7.74211e-07
2200.9	8.25	1.31496e-07	1.83019e-07	1.71477e-07	9.86318e-08	1.25096e-07	1.233e-07	1.38801e-07	1.25408e-07	1.75082e-07
2209.32	8.25	2.80152e-07	2.55009e-07	2.63457e-07	2.70085e-07	2.24308e-07	2.66772e-07	2.28148e-07	2.8624e-07	2.73539e-07
2217.73	8.25	1.9794e-07	1.65869e-07	1.5445e-07	1.74057e-07	1.84074e-07	1.89554e-07	1.42151e-07	2.2475e-07	1.96468e-07
2226.15	8.25	1.7428e-07	2.68755e-07	1.62671e-07	1.81344e-07	1.81314e-07	1.80124e-07	1.99174e-07	1.87592e-07	1.8147e-07
2234.57	8.25	9.01475e-08	5.91413e-08	5.68129e-08	4.40037e-08	6.94598e-08	4.43943e-08	6.25064e-08	6.02063e-08	3.46846e-08
2242.98	8.25	1.87082e-08	1.95973e-08	2.6362e-08	3.45908e-08	4.89127e-08	4.32325e-08	2.08522e-08	3.4052e-08	7.80565e-24
2251.4	8.25	2.13755e-07	1.72782e-07	1.79802e-07	1.78366e-07	1.99831e-07	1.76232e-07	1.83613e-07	1.97843e-07	2.0359e-07
2259.82	8.25	9.36285e-08	1.59492e-07	1.13854e-07	1.35751e-07	1.2169e-07	1.46495e-07	1.38232e-07	1.01908e-07	1.16247e-07
2268.23	8.25	3.6473e-08	5.90133e-08	2.9338e-08	2.91434e-08	2.31463e-08	2.51717e-08	3.96996e-08	9.37316e-09	6.49037e-08
2276.65	8.25	6.53419e-08	1.49198e-07	1.06044e-07	5.64367e-08	3.93347e-08	6.56449e-08	8.16258e-08	1.43515e-07	7.5333e-08
2285.07	8.25	1.96539e-08	7.90252e-09	1.39034e-08	3.66318e-08	0	2.02111e-08	2.6302e-08	0	8.42317e-08
2293.48	8.25	3.83791e-08	0	5.39119e-08	0	1.20333e-08	1.49982e-08	5.80689e-08	0	3.91921e-08
2301.9	8.25	0	0	0	3.94414e-08	0	2.19643e-08	0	0	0
2310.32	8.25	0	0	0	0	2.54378e-08	0	0	0	2.58505e-08
2318.73	8.25	0	0	0	0	2.52601e-08	0	0	0	2.13355e-08
2327.15	8.25	0	0	0	0	0	0	0	0	0
2335.57	8.25	0	0	0	0	0	0	0	0	0
2343.98	8.25	0	0	0	0	0	0	0	0	0
2352.4	8.25	7.98024e-09	0	0	0	0	0	0	0	0
2360.82	8.25	0	0	0	0	0	0	1.15247e-08	0	0
2369.23	8.25	0	4.35508e-08	0	0	0	0	0	0	0
2377.65	8.25	0	1.70657e-08	0	0	0	0	0	0	0
2386.07	8.25	0	0	0	0	0	0	0	0	0
2394.48	8.25	0	0	2.60703e-09	0	0	0	0	0	0
2402.9	8.25	0	0	0	6.93358e-09	0	2.17181e-08	2.10648e-08	0	0
2411.32	8.25	0	0	0	6.99822e-09	0	0	0	0	0
2419.73	8.25	0	0	6.36507e-09	3.363e-08	0	0	0	0	3.72658e-10
2428.15	8.25	0	1.77482e-23	0	0	0	1.85914e-08	0	0	3.33537e-08
2436.57	8.25	0	0	0	0	0	0	0	2.36248e-09	0
2444.98	8.25	1.83629e-08	1.64609e-25	0	4.35782e-08	0	7.23827e-08	1.82036e-08	1.82472e-09	0
2453.4	8.25	0	4.87513e-08	0	0	0	0	0	0	0
2461.82	8.25	1.70031e-08	0	4.13854e-08	0	5.05626e-09	3.95552e-08	0	2.49114e-08	0
2470.23	8.25	1.22339e-07	2.17479e-07	1.44156e-08	7.85912e-08	7.30795e-08	1.31082e-07	1.08025e-07	1.13211e-07	1.23222e-08
2478.65	8.25	4.25793e-07	3.43998e-07	1.97717e-07	3.27916e-07	2.28949e-07	1.96946e-07	2.52519e-07	3.03339e-07	1.52637e-07
2487.07	8.25	6.26289e-06	6.29206e-06	6.44131e-06	4.95324e-06	4.83474e-06	4.92146e-06	5.40412e-06	5.46071e-06	5.545e-06
2495.48	8.25	1.8312e-06	1.91048e-06	2.13687e-06	1.65037e-06	1.75479e-06	1.90628e-06	1.58985e-06	1.69419e-06	1.80492e-06
2503.9	8.25	1.48909e-06	1.42519e-06	1.51915e-06	1.40677e-06	1.53983e-06	1.50167e-06	1.50354e-06	1.43511e-06	1.47994e-06
2512.32	8.25	1.66522e-06	1.65307e-06	1.48283e-06	1.33802e-06	1.286e-06	1.28789e-06	1.53266e-06	1.56217e-06	1.37358e-06
2520.73	8.25	1.13089e-06	1.26491e-06	9.31827e-07	1.0552e-06	1.04353e-06	8.81764e-07	1.20379e-06	1.20476e-06	8.70214e-07

## Sheet: k_GF5
Wavelength	FWHM	k_Summer_L	k_Summer_M	k_Summer_H	k_Winter_L	k_Winter_M	k_Winter_H	k_1976_L	k_1976_M	k_1976_H
1004.77	7.67828	0	0	0	0	0	0	0	0	0
1013.2	7.68189	0	0	0	0	0	0	0	0	0
1021.62	7.68551	0	0	0	0	0	0	0	0	0
1030.05	7.68912	0	0	0	0	0	0	0	0	0
1038.48	7.69273	6.76648e-07	6.70247e-07	6.69428e-07	6.7672e-07	6.86611e-07	6.95193e-07	6.75742e-07	6.81481e-07	6.78783e-07
1046.91	7.69634	7.17488e-07	7.12376e-07	7.10183e-07	7.28552e-07	7.35341e-07	7.31452e-07	7.12264e-07	7.05678e-07	7.07299e-07
1055.33	7.69995	7.17747e-07	7.24391e-07	7.07936e-07	7.08452e-07	7.00652e-07	6.99153e-07	7.09835e-07	7.09624e-07	7.04167e-07
1063.76	7.70356	3.07732e-07	2.91732e-07	2.99831e-07	3.12786e-07	3.02325e-07	3.07848e-07	3.01803e-07	3.08968e-07	2.92282e-07
1072.19	7.70718	5.30654e-08	6.0165e-08	6.32956e-08	3.56778e-08	3.92736e-08	5.54793e-08	5.66888e-08	4.45048e-08	4.49013e-08
1080.62	7.71079	8.43353e-09	7.25487e-09	6.96968e-09	1.37077e-08	2.76353e-09	8.81788e-09	4.21274e-09	1.36634e-08	1.71896e-08
1089.04	7.7144	0	0	1.74058e-09	0	0	-1.57154e-09	1.29302e-09	0	0
1097.47	7.71801	0	3.26727e-09	0	0	2.83396e-09	0	0	2.42112e-09	0
1105.9	7.72162	0	0	0	0	0	0	0	0	0
1114.32	7.72523	1.87544e-09	0	4.21735e-09	0	0	3.97277e-24	0	0	0
1122.75	7.72885	0	0	0	0	0	0	0	0	0
1131.18	7.73246	0	0	0	2.27228e-09	0	0	0	0	0
1139.61	7.73607	0	0	0	0	0	0	0	0	0
1148.03	7.73968	0	0	0	0	0	0	0	0	0
1156.46	7.74329	0	0	0	0	0	0	0	0	0
1164.89	7.7469	0	0	0	0	0	0	0	0	0
1173.32	7.75052	0	0	0	0	0	0	0	4.0166e-09	0
1181.74	7.75413	0	0	0	0	0	0	0	0	0
1190.17	7.75774	0	0	0	0	0	0	1.60848e-09	0	0
1198.6	7.76135	5.66262e-09	2.61668e-09	2.53239e-09	0	9.26726e-10	1.11128e-09	5.40852e-09	0	2.89496e-09
1206.8	7.3271	4.4222e-05	4.3365e-05	4.239e-05	4.50516e-05	4.41856e-05	4.31996e-05	4.44722e-05	4.36054e-05	4.26342e-05
1215.2	7.76857	9.14684e-06	9.24288e-06	9.39533e-06	8.7376e-06	8.83344e-06	9.00897e-06	8.88572e-06	8.98087e-06	9.15047e-06
1223.6	8.1949	1.93581e-05	1.95378e-05	1.98131e-05	1.97617e-05	1.99299e-05	2.02098e-05	1.94874e-05	1.96506e-05	1.99235e-05
1232.34	8.48475	1.92733e-06	1.93436e-06	1.92871e-06	1.68969e-06	1.70365e-06	1.70016e-06	1.78762e-06	1.79101e-06	1.7841e-06
1240.76	8.26	4.85958e-07	4.77009e-07	4.79996e-07	4.5616e-07	4.51327e-07	4.54913e-07	4.60186e-07	4.62841e-07	4.61386e-07
1249.21	7.78302	1.34319e-07	1.4087e-07	1.33768e-07	1.47235e-07	1.38946e-07	1.34916e-07	1.39692e-07	1.37693e-07	1.37957e-07
1257.66	7.78663	2.09372e-07	1.91337e-07	2.06319e-07	1.87458e-07	2.00506e-07	2.1359e-07	2.11662e-07	1.97829e-07	1.873e-07
1266.1	7.79024	2.33076e-07	2.46095e-07	2.40038e-07	2.53071e-07	2.45519e-07	2.45354e-07	2.50637e-07	2.32785e-07	2.22342e-07
1274.55	7.79386	2.94148e-09	0	0	0	0	3.17856e-09	0	0	0
1283	7.79747	5.19137e-08	4.3237e-08	4.40901e-08	3.79938e-08	3.04439e-08	4.4785e-08	3.65007e-08	2.87381e-08	3.00822e-08
1291.45	7.80108	2.33974e-06	2.34566e-06	2.3637e-06	2.36985e-06	2.37888e-06	2.38428e-06	2.33449e-06	2.34186e-06	2.36089e-06
1299.9	7.80469	4.0369e-07	4.05821e-07	4.25818e-07	3.99296e-07	3.87902e-07	3.86848e-07	4.08141e-07	3.93519e-07	4.13893e-07
1308.34	7.8083	3.68114e-08	5.64304e-08	3.18284e-08	4.48955e-08	4.04679e-08	4.49686e-08	5.38214e-08	5.07847e-08	4.14002e-08
1316.79	7.81191	8.81768e-06	8.84223e-06	8.84186e-06	9.05224e-06	9.10519e-06	9.11313e-06	8.9028e-06	8.961e-06	8.95227e-06
1325.24	7.81553	9.47212e-07	9.67618e-07	9.54244e-07	8.2625e-07	8.54233e-07	8.67766e-07	8.55213e-07	8.90338e-07	8.91013e-07
1333.69	7.81914	7.89618e-07	7.84161e-07	7.98789e-07	7.37067e-07	7.27891e-07	7.3922e-07	7.51719e-07	7.54866e-07	7.63735e-07
1342.14	7.82275	3.14854e-06	3.23188e-06	3.27233e-06	3.24839e-06	3.3957e-06	3.42985e-06	3.19561e-06	3.29878e-06	3.32029e-06
1350.58	7.82636	3.28323e-07	2.36087e-07	3.41097e-07	2.50892e-07	3.30333e-07	3.37834e-07	2.92526e-07	3.45554e-07	4.44198e-07
1359.03	7.82997	8.37643e-09	2.1838e-08	0	2.18051e-08	8.67078e-09	6.48917e-09	3.42253e-08	6.27179e-08	0
1367.48	7.83358	1.69626e-07	9.90552e-08	3.33783e-08	1.35533e-07	5.44554e-08	4.44767e-08	2.12532e-07	1.11709e-07	3.23403e-08
1375.93	7.8372	2.6204e-07	2.26491e-07	1.12711e-07	2.5111e-07	2.33971e-07	7.78257e-08	2.54953e-07	2.09319e-07	8.06509e-08
1384.37	7.84081	2.65593e-08	8.57549e-09	3.0451e-09	0	1.02836e-08	0	6.05431e-08	1.1984e-08	-9.43286e-09
1392.82	7.84442	1.68043e-10	0	0	9.28824e-10	0	0	0	0	0
1401.27	7.84803	0	0	0	2.91811e-08	0	0	0	0	8.21858e-09
1409.72	7.85164	0	0	-4.9614e-09	0	0	0	0	0	0
1418.17	7.85525	0	0	0	9.14531e-09	0	9.1653e-09	6.66954e-09	0	8.59229e-10
1426.61	7.85887	7.2569e-07	9.62274e-07	1.38637e-06	6.23732e-07	9.4497e-07	1.23815e-06	6.22657e-07	9.17105e-07	1.30782e-06
1435.06	7.86248	0.000327839	0.000312513	0.000282403	0.000342721	0.000327639	0.000300342	0.000334307	0.000318922	0.000289146
1443.51	7.86609	0.000144071	0.000145536	0.00014682	0.000133748	0.000135495	0.000138752	0.000137505	0.000139036	0.00014096
1451.96	7.8697	1.21013e-05	1.19482e-05	1.16442e-05	9.26341e-06	9.1961e-06	9.00157e-06	1.02548e-05	1.01402e-05	9.87441e-06
1460.4	7.87331	5.3038e-07	5.33976e-07	5.09578e-07	3.43365e-07	3.96533e-07	3.54529e-07	4.03882e-07	4.33539e-07	4.55432e-07
1468.85	7.87692	4.79377e-06	4.48443e-06	3.7845e-06	4.73596e-06	4.50651e-06	3.82941e-06	4.72879e-06	4.44103e-06	3.81349e-06
1477.3	7.88054	9.93255e-06	9.44165e-06	8.775e-06	1.02004e-05	9.72851e-06	9.10302e-06	1.00307e-05	9.58203e-06	8.94205e-06
1485.75	7.88415	1.9025e-06	1.91211e-06	1.89964e-06	1.67903e-06	1.71272e-06	1.67758e-06	1.78668e-06	1.77835e-06	1.77584e-06
1494.2	7.88776	3.29538e-06	3.39715e-06	3.5839e-06	3.2778e-06	3.37807e-06	3.54931e-06	3.28346e-06	3.37021e-06	3.56961e-06
1502.64	7.89137	5.34656e-07	5.3193e-07	5.47697e-07	4.92038e-07	5.0348e-07	5.09025e-07	4.96916e-07	4.99941e-07	5.28582e-07
1511.09	7.89498	1.21707e-08	2.17862e-08	2.09761e-08	1.85698e-08	1.19334e-08	1.09036e-08	1.28001e-08	2.29477e-08	2.39464e-08
1519.54	7.89859	1.93153e-07	1.88467e-07	1.81356e-07	1.43655e-07	1.22215e-07	1.44348e-07	1.34793e-07	1.46804e-07	1.41439e-07
1527.99	7.90221	7.3065e-06	7.29502e-06	7.32573e-06	6.55106e-06	6.56367e-06	6.56281e-06	6.81196e-06	6.81653e-06	6.82876e-06
1536.43	7.90582	3.87539e-05	3.87502e-05	3.875e-05	3.98398e-05	3.98308e-05	3.98021e-05	3.91591e-05	3.91486e-05	3.91466e-05
1544.88	7.90943	1.40371e-05	1.40036e-05	1.3991e-05	1.36601e-05	1.36661e-05	1.3647e-05	1.3752e-05	1.37284e-05	1.37307e-05
1553.33	6.6598	2.79133e-07	2.72202e-07	2.83807e-07	2.51975e-07	2.6304e-07	2.53194e-07	2.59076e-07	2.5332e-07	2.70506e-07
1560.93	8.4042	4.29007e-07	4.25802e-07	4.35741e-07	4.03831e-07	4.18984e-07	4.16388e-07	4.24013e-07	4.19792e-07	4.18799e-07
1569.23	7.8809	0.000134658	0.000134712	0.000134801	0.000130646	0.000130674	0.000130789	0.000131752	0.000131806	0.000131898
1577.61	7.45885	0.000173312	0.000173281	0.000173261	0.000177894	0.000177855	0.00017782	0.000175035	0.000175019	0.000174966
1586.31	7.4983	2.32005e-05	2.31734e-05	2.30917e-05	2.06819e-05	2.0655e-05	2.0599e-05	2.1632e-05	2.16249e-05	2.15526e-05
1594.96	7.7622	9.16889e-06	9.16124e-06	9.17859e-06	8.02116e-06	8.0167e-06	8.01545e-06	8.44273e-06	8.44555e-06	8.45572e-06
1603.38	7.93471	0.000196064	0.00019606	0.000196091	0.000203729	0.000203754	0.000203787	0.000199479	0.00019949	0.000199525
1611.79	7.93832	0.000133543	0.000133526	0.000133467	0.000131852	0.000131848	0.000131802	0.000131978	0.00013193	0.000131916
1620.21	7.94194	1.66157e-05	1.66353e-05	1.65964e-05	1.34333e-05	1.34424e-05	1.34283e-05	1.47114e-05	1.47022e-05	1.46946e-05
1628.63	7.94555	4.27242e-06	4.28365e-06	4.29611e-06	4.08343e-06	4.09639e-06	4.08522e-06	4.14343e-06	4.14238e-06	4.15266e-06
1637.05	7.94916	1.21548e-05	1.21484e-05	1.21195e-05	1.16063e-05	1.16145e-05	1.15616e-05	1.17841e-05	1.17835e-05	1.17669e-05
1645.47	7.95277	3.07694e-05	3.07999e-05	3.0835e-05	3.22592e-05	3.2274e-05	3.23234e-05	3.15029e-05	3.15169e-05	3.15559e-05
1653.89	7.95638	1.44608e-05	1.44646e-05	1.44217e-05	1.36663e-05	1.36514e-05	1.36342e-05	1.39667e-05	1.39751e-05	1.39415e-05
1662.31	7.95999	2.89733e-06	2.89872e-06	2.89641e-06	2.49891e-06	2.49366e-06	2.50294e-06	2.59115e-06	2.58841e-06	2.59912e-06
1670.73	7.96361	1.15692e-06	1.15829e-06	1.17021e-06	9.49775e-07	9.6289e-07	9.63124e-07	1.02835e-06	1.02731e-06	1.04812e-06
1679.15	7.96722	3.05166e-07	2.77403e-07	2.90974e-07	2.56206e-07	2.56318e-07	2.50527e-07	2.63622e-07	2.63018e-07	2.5893e-07
1687.57	7.97083	9.30426e-08	9.93055e-08	1.09838e-07	1.11088e-07	8.74283e-08	1.00729e-07	1.16539e-07	9.1296e-08	9.56328e-08
1695.99	7.97444	4.94277e-09	3.43556e-08	1.02301e-08	4.58226e-08	1.6717e-08	9.90323e-09	1.39807e-08	1.33025e-08	1.09858e-08
1704.41	7.97805	1.47595e-08	9.51579e-09	2.5849e-08	8.8265e-09	8.01423e-09	1.22006e-08	1.48156e-08	2.83181e-08	3.33997e-08
1712.83	7.98166	4.07281e-08	2.1124e-08	1.4611e-08	1.6824e-08	7.79631e-09	1.68025e-08	1.8147e-08	2.41856e-08	2.72135e-08
1721.25	7.98528	2.39098e-08	9.35131e-09	3.81788e-08	3.39874e-08	8.76923e-25	2.08132e-08	6.63888e-09	0	2.46738e-08
1729.67	7.98889	6.92901e-09	2.07314e-08	7.28602e-09	0	0	0	2.27883e-24	0	4.77473e-24
1738.08	7.9925	0	9.8053e-09	1.22184e-08	0	0	0	0	0	0
1746.5	7.99611	0	0	0	0	0	0	0	0	0
1754.92	7.99972	3.26987e-07	3.41032e-07	3.32077e-07	2.364e-07	2.30042e-07	2.3201e-07	2.78818e-07	2.76596e-07	2.94747e-07
1763.34	8.00333	2.508e-07	2.56672e-07	2.83623e-07	1.52187e-07	1.864e-07	1.55187e-07	1.86331e-07	1.9076e-07	1.76236e-07
1771.76	8.00695	6.2065e-08	6.05555e-08	7.76352e-08	5.8e-08	2.89473e-08	2.14655e-08	2.18943e-08	4.94009e-08	2.00093e-08
1780.18	8.01056	0	3.90346e-09	0	4.86559e-09	8.56983e-09	0	4.49013e-09	0	5.06844e-08
1788.6	8.01417	3.29287e-07	3.33399e-07	3.27308e-07	2.12948e-07	2.61112e-07	2.10933e-07	2.6096e-07	2.55986e-07	2.54255e-07
1797.02	8.01778	1.42365e-07	1.10015e-07	1.73271e-07	9.99437e-08	4.08975e-08	1.03242e-07	1.32267e-07	1.00204e-07	8.49671e-08
1805.44	8.02139	5.14108e-08	5.90328e-08	1.83756e-07	2.6328e-08	8.0961e-08	5.57886e-10	4.71076e-08	9.10515e-08	2.93563e-08
1813.86	8.025	6.84339e-08	0	7.03055e-09	2.30961e-08	0	2.67469e-23	4.69048e-08	1.0857e-07	0
1822.28	8.02862	4.38099e-11	2.22297e-09	1.61411e-08	0	0	0	0	0	0
1830.7	8.03223	0	0	0	0	0	0	0	0	0
1839.12	8.03584	0	0	0	0	0	0	0	0	0
1847.54	8.03945	0	0	0	0	0	0	0	0	0
1855.96	8.04306	0	0	0	0	0	0	0	0	0
1864.38	8.04667	1.59658e-08	3.09537e-10	6.68823e-08	1.91999e-07	6.40923e-09	7.86268e-08	6.83564e-09	0	1.00762e-08
1872.79	8.05029	1.15336e-05	3.99576e-06	2.64915e-06	1.08652e-05	3.1738e-06	1.92844e-06	1.10353e-05	3.60362e-06	2.36779e-06
1881.21	8.0539	6.37901e-05	6.07859e-05	3.27644e-05	6.51515e-05	6.21468e-05	2.8059e-05	6.42521e-05	6.10657e-05	3.05771e-05
1889.63	8.05751	1.57374e-05	1.52401e-05	8.36957e-06	1.53981e-05	1.52406e-05	7.58115e-06	1.54695e-05	1.5027e-05	7.81309e-06
1898.05	8.06112	3.23282e-06	3.32522e-06	1.41599e-06	2.85412e-06	2.84247e-06	1.01395e-06	2.91436e-06	2.99433e-06	1.18849e-06
1906.47	8.06473	1.39979e-06	1.07046e-06	2.49379e-07	1.11298e-06	9.40339e-07	2.00169e-07	1.03314e-06	9.81787e-07	3.33688e-07
1914.89	8.06834	7.08751e-07	5.46158e-07	2.71992e-07	5.93729e-07	3.74802e-07	1.70513e-07	6.07669e-07	5.03601e-07	1.92578e-07
1923.31	8.07196	7.50506e-07	6.78951e-07	3.9101e-07	4.63428e-07	5.2113e-07	2.19249e-07	6.14965e-07	5.47064e-07	2.75213e-07
1931.73	8.07557	2.02242e-06	3.07271e-06	3.94774e-06	1.46083e-06	2.19189e-06	3.16934e-06	1.58088e-06	2.39513e-06	3.29356e-06
1940.15	8.07918	0.000134868	0.000172169	0.000206622	0.000101079	0.000126915	0.000155177	0.000114694	0.000145241	0.000176103
1948.57	8.08279	0.00074362	0.00075673	0.000766528	0.00068302	0.000699583	0.000719604	0.000707416	0.000722249	0.000736856
1956.99	8.0864	0.00159636	0.00153975	0.00141281	0.00162297	0.00157833	0.00148473	0.00160226	0.00155174	0.00143836
1965.41	8.09001	0.00114896	0.00113272	0.00111212	0.00118922	0.0011743	0.00115579	0.00116407	0.00114842	0.00112789
1973.83	8.09363	0.000360938	0.000360787	0.000360754	0.000348717	0.000348788	0.000350231	0.0003529	0.000352924	0.000353573
1982.25	8.09724	7.06249e-05	6.88096e-05	6.53072e-05	6.06132e-05	5.91228e-05	5.63076e-05	6.4592e-05	6.2948e-05	5.98176e-05
1990.67	8.10085	5.71231e-05	5.70409e-05	5.65328e-05	5.11136e-05	5.10414e-05	5.07041e-05	5.32871e-05	5.32265e-05	5.27372e-05
1999.09	8.10446	0.00126293	0.00127353	0.00128912	0.00120016	0.00121242	0.00122967	0.00122528	0.00123676	0.00125325
2007.5	8.10807	0.00281838	0.00278243	0.00272709	0.00284091	0.00280834	0.00275838	0.00282145	0.00278727	0.00273413
2015.92	8.11168	0.00277388	0.00278051	0.00278725	0.00279119	0.00279666	0.0028035	0.00276848	0.00277447	0.00278105
2024.34	8.1153	0.000882151	0.000885331	0.000887925	0.000788145	0.000790594	0.00079252	0.000826008	0.000828668	0.000830956
2032.76	8.11891	0.00032475	0.000323805	0.000322588	0.000286941	0.000286312	0.000285411	0.000301527	0.000300757	0.000299681
2041.18	8.12252	0.000308253	0.000307802	0.000307198	0.000308398	0.000308064	0.00030749	0.00030684	0.000306408	0.00030589
2049.6	8.12613	0.000733504	0.000731626	0.000727752	0.000726566	0.000725034	0.000721962	0.000726822	0.000725166	0.000721684
2058.02	8.12974	0.00080278	0.000803442	0.000804331	0.000840782	0.000841956	0.000843881	0.000819768	0.000820579	0.00082187
2066.44	8.13335	0.000897035	0.000897974	0.000900144	0.00091778	0.000918568	0.00092039	0.000903634	0.000904534	0.000906572
2074.86	8.13697	0.000612079	0.000611477	0.000610335	0.000572077	0.000571534	0.000570468	0.00058778	0.000587225	0.000586141
2083.28	8.14058	0.000336346	0.000336177	0.000335933	0.000300343	0.000300244	0.000300087	0.000314536	0.000314381	0.000314213
2091.7	8.14419	0.000206102	0.000206198	0.00020622	0.000175403	0.000175518	0.000175664	0.000187574	0.000187703	0.00018777
2100.12	8.1478	7.11357e-05	7.10187e-05	7.08231e-05	6.25088e-05	6.23305e-05	6.2054e-05	6.56769e-05	6.55376e-05	6.52534e-05
2108.54	8.4804	2.81704e-05	2.80858e-05	2.79289e-05	2.58539e-05	2.57436e-05	2.55588e-05	2.65293e-05	2.64314e-05	2.62792e-05
2116.97	8.023	1.98724e-05	1.99242e-05	1.99737e-05	1.82636e-05	1.83262e-05	1.83904e-05	1.86922e-05	1.87697e-05	1.88338e-05
2125.41	8.476	3.45767e-06	3.46803e-06	3.48338e-06	2.49984e-06	2.54851e-06	2.53926e-06	2.99297e-06	3.02965e-06	3.04155e-06
2134.3	8.38695	1.79778e-06	1.77991e-06	1.77556e-06	1.58688e-06	1.60539e-06	1.59374e-06	1.70961e-06	1.73064e-06	1.7431e-06
2142.31	8.12115	2.90683e-06	2.89542e-06	2.90363e-06	2.69738e-06	2.70358e-06	2.66558e-06	2.71623e-06	2.69709e-06	2.71163e-06
2150.88	8.16947	1.91569e-05	1.91924e-05	1.92711e-05	1.96966e-05	1.97247e-05	1.97966e-05	1.93719e-05	1.94205e-05	1.94815e-05
2159.31	8.17308	1.25058e-05	1.24661e-05	1.23951e-05	1.27271e-05	1.27203e-05	1.26615e-05	1.25693e-05	1.24969e-05	1.24847e-05
2167.73	8.1767	9.05273e-06	9.06915e-06	9.09006e-06	8.76707e-06	8.76703e-06	8.80577e-06	8.86684e-06	8.87714e-06	8.8914e-06
2176.16	8.18031	2.49235e-06	2.52969e-06	2.52184e-06	2.36731e-06	2.38427e-06	2.39567e-06	2.46626e-06	2.44857e-06	2.47035e-06
2184.59	8.18392	7.20513e-07	7.2001e-07	7.15227e-07	6.49575e-07	6.27998e-07	6.39534e-07	6.71989e-07	6.58479e-07	7.02438e-07
2193.01	8.18753	7.04692e-07	7.57684e-07	7.70346e-07	6.49249e-07	6.59588e-07	6.40558e-07	6.85729e-07	6.40937e-07	7.05963e-07
2201.44	8.19114	1.03398e-07	1.32915e-07	1.46805e-07	8.16324e-08	9.46296e-08	1.04103e-07	1.08307e-07	1.00562e-07	1.31303e-07
2209.87	8.19475	3.06148e-07	2.80735e-07	2.90117e-07	2.98278e-07	2.55267e-07	2.88157e-07	2.49494e-07	3.11667e-07	2.97751e-07
2218.3	8.19837	1.84693e-07	1.61381e-07	1.3929e-07	1.63998e-07	1.64049e-07	1.82633e-07	1.33789e-07	2.18103e-07	1.92447e-07
2226.72	8.20198	1.64083e-07	2.53728e-07	1.65418e-07	1.62182e-07	1.78063e-07	1.70997e-07	2.05191e-07	1.80829e-07	1.632e-07
2235.15	8.20559	8.96908e-08	5.48247e-08	4.46766e-08	3.99479e-08	6.92968e-08	4.27293e-08	5.47688e-08	4.62948e-08	3.47717e-08
2243.58	8.2092	1.99416e-08	2.46036e-08	2.9478e-08	3.70408e-08	5.03408e-08	4.50071e-08	1.6657e-08	3.72761e-08	6.43196e-24
2252.01	8.21281	2.16023e-07	1.87325e-07	1.82616e-07	1.87219e-07	2.30221e-07	1.91078e-07	2.03057e-07	2.06417e-07	2.24673e-07
2260.43	8.21642	7.81853e-08	1.57293e-07	1.0082e-07	1.27622e-07	1.02111e-07	1.46718e-07	1.30412e-07	8.58396e-08	1.1352e-07
2268.86	8.22004	3.42941e-08	4.01253e-08	2.21012e-08	8.71103e-09	1.6862e-08	1.69478e-08	3.52777e-08	0	4.45242e-08
2277.29	8.22365	6.22178e-08	1.50995e-07	1.06247e-07	7.07079e-08	4.48191e-08	6.48115e-08	7.63083e-08	1.44698e-07	7.75294e-08
2285.71	8.22726	1.85016e-08	8.94331e-09	1.57332e-08	3.61879e-08	0	2.23827e-08	2.5521e-08	0	8.10757e-08
2294.14	8.23087	3.05299e-08	0	5.14019e-08	0	1.23123e-08	1.27735e-08	5.11513e-08	0	3.75617e-08
2302.57	8.23448	0	0	0	3.99235e-08	0	2.40313e-08	0	0	0
2311	8.23809	0	0	0	0	2.49146e-08	0	0	0	3.96924e-08
2319.42	8.24171	0	0	0	0	2.31234e-08	0	0	0	0
2327.85	8.24532	0	0	0	0	0	0	0	0	0
2336.28	8.24893	0	0	0	0	0	0	0	0	0
2344.71	8.25254	7.55683e-09	0	0	0	0	0	0	0	0
2353.13	8.25615	0	0	0	0	0	0	0	0	0
2361.56	8.25976	0	0	0	0	0	0	9.28694e-09	0	0
2369.99	8.26338	0	6.32672e-08	0	0	0	0	0	0	0
2378.41	8.26699	0	0	0	0	0	0	0	0	0
2386.84	8.2706	0	0	0	0	0	0	0	0	0
2395.27	8.27421	0	0	2.84627e-09	0	0	0	0	0	0
2403.7	8.27782	0	0	0	9.84357e-09	0	2.93511e-08	2.40826e-08	0	0
2412.12	8.28143	0	0	0	8.653e-09	0	0	0	0	2.61902e-10
2420.55	8.28505	0	0	5.49512e-09	2.60322e-08	0	0	0	0	0
2428.98	8.28866	0	-2.66522e-25	0	0	0	1.75531e-08	0	0	3.53337e-08
2437.41	8.29227	0	0	0	0	0	0	1.8705e-08	2.0996e-09	0
2445.83	8.29588	0	1.6369e-25	0	4.3698e-08	0	7.25532e-08	2.18149e-08	3.76874e-08	0
2454.26	8.29949	0	5.16098e-08	0	0	0	0	2.75173e-08	3.39603e-08	0
2462.69	8.3031	2.02888e-08	3.15532e-08	5.15368e-08	0	5.23128e-09	0	0	2.17127e-08	0
2471.11	8.30672	1.21596e-07	2.24282e-07	1.48565e-08	8.31228e-08	7.34102e-08	1.00231e-07	1.10871e-07	1.2657e-07	1.39802e-08
2479.54	8.31033	7.48492e-07	5.99245e-07	3.27101e-07	5.21277e-07	3.86437e-07	2.28082e-07	5.05792e-07	5.02703e-07	2.55785e-07
2487.97	8.31394	5.64824e-06	5.71009e-06	5.90568e-06	4.55125e-06	4.4768e-06	4.52236e-06	4.92769e-06	5.01827e-06	5.09366e-06
2496.4	8.31755	1.88943e-06	1.94098e-06	2.15123e-06	1.70668e-06	1.77476e-06	1.88632e-06	1.63839e-06	1.73469e-06	1.81886e-06
2504.82	8.32116	1.33839e-06	1.31382e-06	1.38483e-06	1.17585e-06	1.2916e-06	1.19589e-06	1.40011e-06	1.23659e-06	1.27313e-06
2513.25	8.32477	1.83463e-06	1.82769e-06	1.67022e-06	1.47818e-06	1.43189e-06	1.4718e-06	1.62229e-06	1.73651e-06	1.5675e-06

## Sheet: k_EMIT
Wavelength	FWHM	k_Summer_L	k_Summer_M	k_Summer_H	k_Winter_L	k_Winter_M	k_Winter_H	k_1976_L	k_1976_M	k_1976_H
1006.83	8.529	0	0	0	0	0	0	0	0	0
1014.29	8.53	0	0	0	0	0	0	0	0	0
1021.76	8.531	0	0	0	0	0	0	0	0	0
1029.22	8.533	0	0	0	0	0	0	0	0	0
1036.68	8.534	5.41191e-07	5.36961e-07	5.37747e-07	5.46133e-07	5.49682e-07	5.59334e-07	5.45583e-07	5.46659e-07	5.44763e-07
1044.14	8.536	1.34799e-07	1.25988e-07	1.20417e-07	1.13338e-07	1.23694e-07	1.26999e-07	1.26601e-07	1.24635e-07	1.25681e-07
1051.6	8.537	1.56639e-06	1.56978e-06	1.5657e-06	1.6081e-06	1.61232e-06	1.60309e-06	1.56799e-06	1.57475e-06	1.57043e-06
1059.06	8.538	1.36068e-07	1.27386e-07	1.24152e-07	1.25272e-07	1.06364e-07	1.12941e-07	1.17928e-07	1.23873e-07	1.13696e-07
1066.52	8.54	3.02573e-07	2.86765e-07	2.89699e-07	2.99541e-07	2.93695e-07	3.04021e-07	2.97316e-07	2.92297e-07	2.89844e-07
1073.98	8.541	4.42109e-08	5.01456e-08	4.92964e-08	2.90445e-08	3.04874e-08	4.42356e-08	4.30587e-08	3.13526e-08	4.36235e-08
1081.44	8.543	6.96902e-09	5.9864e-09	6.11364e-09	1.03619e-08	8.16e-10	4.66703e-09	1.73873e-09	1.01592e-08	1.18866e-08
1088.9	8.544	1.19681e-09	0	1.59282e-09	0	0	-1.42685e-09	1.1473e-09	0	0
1096.36	8.545	1.57965e-09	3.47948e-09	1.38179e-09	0	3.06135e-09	0	0	2.86516e-09	0
1103.82	8.547	0	0	0	0	0	0	0	0	0
1111.28	8.548	1.09807e-09	0	0	0	0	1.07276e-24	0	0	0
1118.74	8.55	0	0	8.48371e-09	4.87952e-09	0	0	0	0	0
1126.2	8.551	0	0	0	0	0	0	0	0	0
1133.66	8.552	0	0	0	1.74475e-09	0	0	0	0	0
1141.11	8.554	0	0	0	0	0	0	0	0	0
1148.57	8.555	0	0	0	0	0	0	0	0	0
1156.03	8.557	0	0	0	0	0	0	0	0	0
1163.49	8.558	0	0	0	0	0	0	0	0	0
1170.95	8.559	0	0	0	0	0	0	0	2.70822e-09	0
1178.4	8.561	0	0	0	0	0	0	0	0	0
1185.86	8.562	0	0	0	0	0	0	0	0	0
1193.32	8.564	0	0	0	0	0	0	1.40738e-09	0	0
1200.78	8.565	1.49606e-05	1.45052e-05	1.41164e-05	1.50866e-05	1.46382e-05	1.42725e-05	1.49727e-05	1.45164e-05	1.41511e-05
1208.23	8.566	3.3808e-05	3.34892e-05	3.31038e-05	3.43642e-05	3.40569e-05	3.36665e-05	3.39387e-05	3.36225e-05	3.3233e-05
1215.69	8.568	1.33629e-05	1.34921e-05	1.37049e-05	1.31522e-05	1.32811e-05	1.35197e-05	1.31911e-05	1.33221e-05	1.35553e-05
1223.15	8.569	2.23175e-05	2.24726e-05	2.26858e-05	2.29101e-05	2.30498e-05	2.32735e-05	2.2538e-05	2.26803e-05	2.28938e-05
1230.6	8.571	2.94569e-06	2.94731e-06	2.94089e-06	2.53133e-06	2.54611e-06	2.53661e-06	2.68378e-06	2.6863e-06	2.6669e-06
1238.06	8.572	8.63092e-07	8.61172e-07	8.58981e-07	8.44459e-07	8.41581e-07	8.49011e-07	8.58863e-07	8.53713e-07	8.5613e-07
1245.52	8.573	7.2717e-08	6.31012e-08	6.98722e-08	6.44111e-08	6.24427e-08	5.66619e-08	5.63016e-08	6.45305e-08	6.08103e-08
1252.97	8.575	2.27126e-07	2.25254e-07	2.31409e-07	2.26511e-07	2.39522e-07	2.26935e-07	2.37852e-07	2.24595e-07	2.21824e-07
1260.43	8.576	2.294e-07	2.19144e-07	2.24158e-07	2.16874e-07	2.20776e-07	2.37073e-07	2.2692e-07	2.23664e-07	2.13539e-07
1267.88	8.578	1.50457e-07	1.6232e-07	1.52268e-07	1.68473e-07	1.57272e-07	1.602e-07	1.61423e-07	1.45124e-07	1.38263e-07
1275.34	8.579	2.26087e-09	0	0	0	0	2.50032e-09	0	0	0
1282.79	8.58	5.65816e-08	4.9253e-08	4.94204e-08	4.21796e-08	3.49562e-08	4.82854e-08	4.26042e-08	3.47583e-08	3.53584e-08
1290.25	8.582	2.02844e-06	2.03423e-06	2.0448e-06	2.03352e-06	2.03715e-06	2.03905e-06	2.01166e-06	2.01667e-06	2.02397e-06
1297.71	8.583	1.12532e-06	1.12761e-06	1.1423e-06	1.14012e-06	1.13979e-06	1.14502e-06	1.14025e-06	1.13398e-06	1.14817e-06
1305.16	8.585	1.11844e-08	1.40502e-08	8.06456e-09	2.18158e-08	6.58448e-09	6.36716e-09	1.65341e-08	1.04926e-08	1.54582e-08
1312.61	8.586	4.94486e-06	4.85118e-06	4.68808e-06	4.97195e-06	4.89247e-06	4.73522e-06	4.93699e-06	4.84776e-06	4.69424e-06
1320.07	8.587	5.68484e-06	5.73445e-06	5.81522e-06	5.72192e-06	5.80063e-06	5.88168e-06	5.66716e-06	5.73845e-06	5.81121e-06
1327.52	8.589	2.13995e-07	2.45205e-07	2.03963e-07	1.53103e-07	1.67411e-07	1.78552e-07	1.64173e-07	1.96305e-07	1.85666e-07
1334.98	8.59	1.73986e-06	1.7089e-06	1.65596e-06	1.71727e-06	1.6825e-06	1.62884e-06	1.71663e-06	1.68051e-06	1.62623e-06
1342.43	8.592	3.04726e-06	3.15302e-06	3.23205e-06	3.1188e-06	3.29153e-06	3.36078e-06	3.07392e-06	3.20682e-06	3.25937e-06
1349.88	8.593	5.06857e-07	5.12348e-07	7.47729e-07	3.97583e-07	5.38291e-07	6.09619e-07	4.36731e-07	5.61632e-07	6.92547e-07
1357.34	8.594	4.70299e-09	1.45e-08	3.88732e-09	6.67921e-08	5.40593e-09	4.11026e-09	3.64843e-08	4.58457e-08	2.2552e-09
1364.79	8.596	5.01196e-08	6.79131e-08	7.37286e-09	1.26457e-07	1.73488e-08	7.89723e-09	5.20474e-08	1.07543e-08	1.8839e-08
1372.24	8.597	3.80008e-07	2.5547e-07	1.19585e-07	3.14048e-07	2.65418e-07	9.70788e-08	3.50481e-07	2.72512e-07	7.58406e-08
1379.69	8.599	1.31212e-07	1.45317e-07	5.35669e-08	1.4971e-07	1.53091e-07	2.72395e-08	1.55478e-07	1.48153e-07	3.75242e-08
1387.14	8.6	1.7172e-08	2.54136e-09	1.62697e-09	0	0	0	3.64219e-08	2.61968e-09	-3.81348e-09
1394.59	8.601	0	0	0	1.22259e-09	0	0	0	0	0
1402.04	8.603	0	0	0	2.72143e-08	0	0	0	0	8.61223e-09
1409.49	8.604	0	0	-4.62343e-09	0	0	0	0	0	0
1416.94	8.606	0	0	0	6.76177e-09	0	8.42384e-09	0	0	6.97968e-10
1424.39	8.607	7.65041e-08	4.26606e-08	1.22796e-08	3.26725e-08	8.37996e-08	2.53186e-08	2.42066e-08	4.20916e-08	1.47256e-08
1431.84	8.608	0.000240847	0.000199569	0.000154979	0.000250958	0.000211196	0.000166058	0.000245949	0.000205505	0.00015999
1439.29	8.61	0.00025476	0.000251428	0.000231923	0.000252412	0.000250447	0.000236102	0.000252002	0.000249251	0.000231442
1446.74	8.611	6.8747e-05	6.85394e-05	6.5394e-05	5.93279e-05	5.95923e-05	5.73977e-05	6.29968e-05	6.30282e-05	6.03095e-05
1454.19	8.613	4.94102e-06	4.36379e-06	3.82559e-06	3.51127e-06	3.07885e-06	2.66401e-06	3.96913e-06	3.4782e-06	3.03984e-06
1461.64	8.614	3.84552e-07	3.81846e-07	3.70836e-07	2.32858e-07	2.79222e-07	2.38707e-07	2.74102e-07	2.86679e-07	3.06123e-07
1469.08	8.615	6.09442e-06	5.90946e-06	5.32624e-06	6.08896e-06	5.99647e-06	5.44247e-06	6.0547e-06	5.90119e-06	5.37514e-06
1476.53	8.617	1.1263e-05	1.0409e-05	9.32385e-06	1.16354e-05	1.0806e-05	9.75537e-06	1.14186e-05	1.06167e-05	9.54846e-06
1483.98	8.618	3.32573e-06	3.34355e-06	3.36499e-06	3.06612e-06	3.08704e-06	3.06916e-06	3.18314e-06	3.1697e-06	3.20018e-06
1491.43	8.62	1.66953e-06	1.66493e-06	1.71771e-06	1.56653e-06	1.58306e-06	1.62358e-06	1.615e-06	1.61655e-06	1.67131e-06
1498.87	8.621	2.94319e-06	2.94618e-06	2.98715e-06	2.92419e-06	2.94023e-06	2.96192e-06	2.91434e-06	2.92628e-06	2.95192e-06
1506.32	8.622	9.22532e-08	8.66711e-08	7.60684e-08	7.40786e-08	7.19656e-08	8.41227e-08	8.29972e-08	6.74471e-08	1.05231e-07
1513.76	8.624	1.07746e-08	3.70271e-08	2.25901e-08	1.90862e-08	1.48072e-08	7.695e-09	6.42955e-09	1.99784e-08	2.10088e-08
1521.21	8.625	7.5085e-07	7.51658e-07	7.47986e-07	5.74436e-07	5.63415e-07	5.76794e-07	6.16493e-07	6.3649e-07	6.36803e-07
1528.66	8.627	9.9115e-06	9.94001e-06	1.00417e-05	9.06198e-06	9.10148e-06	9.16542e-06	9.36403e-06	9.40214e-06	9.48017e-06
1536.1	8.628	3.87109e-05	3.87084e-05	3.87105e-05	3.96344e-05	3.96238e-05	3.95988e-05	3.90325e-05	3.90224e-05	3.90237e-05
1543.55	8.629	2.22854e-05	2.22658e-05	2.22826e-05	2.23408e-05	2.23607e-05	2.23669e-05	2.22186e-05	2.22077e-05	2.22306e-05
1550.99	8.631	5.25353e-07	5.06619e-07	5.14028e-07	4.35677e-07	4.42193e-07	4.33577e-07	4.55842e-07	4.53602e-07	4.57451e-07
1558.43	8.632	3.7948e-07	3.75307e-07	3.89473e-07	3.7269e-07	3.639e-07	3.64464e-07	3.67272e-07	3.75362e-07	3.77021e-07
1565.88	8.634	2.8346e-05	2.83747e-05	2.84077e-05	2.51044e-05	2.51291e-05	2.51716e-05	2.63725e-05	2.63923e-05	2.6424e-05
1573.32	8.635	0.000211937	0.000211969	0.000211983	0.000216199	0.000216203	0.000216245	0.000213294	0.000213313	0.000213339
1580.76	8.636	0.000137513	0.000137446	0.000137332	0.000137653	0.000137593	0.000137499	0.000136921	0.00013687	0.000136751
1588.2	8.638	1.05193e-05	1.05148e-05	1.04877e-05	8.99533e-06	8.98301e-06	8.98322e-06	9.59415e-06	9.60652e-06	9.59058e-06
1595.65	8.639	2.23496e-05	2.23639e-05	2.24289e-05	2.03356e-05	2.03527e-05	2.03952e-05	2.10867e-05	2.11063e-05	2.11648e-05
1603.09	8.641	0.000192984	0.000192976	0.000193002	0.000199658	0.00019968	0.000199705	0.000195864	0.000195872	0.000195901
1610.53	8.642	0.000156153	0.000156147	0.000156075	0.000156918	0.000156912	0.000156858	0.000155886	0.000155837	0.000155814
1617.97	8.643	3.35366e-05	3.35549e-05	3.35306e-05	2.88899e-05	2.89078e-05	2.89042e-05	3.07015e-05	3.06886e-05	3.07055e-05
1625.41	8.645	4.31027e-06	4.32116e-06	4.33129e-06	3.58494e-06	3.59542e-06	3.5895e-06	3.89584e-06	3.89856e-06	3.9016e-06
1632.85	8.646	4.22466e-06	4.23893e-06	4.23184e-06	4.21479e-06	4.22741e-06	4.20936e-06	4.20121e-06	4.2157e-06	4.22247e-06
1640.29	8.648	3.10101e-05	3.10258e-05	3.09978e-05	3.11732e-05	3.11755e-05	3.11573e-05	3.09615e-05	3.09674e-05	3.0957e-05
1647.73	8.649	2.94413e-05	2.94626e-05	2.95039e-05	3.06386e-05	3.06595e-05	3.06845e-05	3.00191e-05	3.00266e-05	3.00522e-05
1655.17	8.65	1.06348e-05	1.06294e-05	1.05713e-05	9.73213e-06	9.71776e-06	9.68777e-06	1.00824e-05	1.00899e-05	1.00519e-05
1662.61	8.652	2.95826e-06	2.95854e-06	2.95654e-06	2.51836e-06	2.51426e-06	2.52399e-06	2.64538e-06	2.64489e-06	2.65365e-06
1670.05	8.653	1.39202e-06	1.38842e-06	1.39952e-06	1.08017e-06	1.09129e-06	1.09721e-06	1.22299e-06	1.22521e-06	1.24096e-06
1677.48	8.655	3.8179e-07	3.56575e-07	3.69609e-07	3.18852e-07	3.2759e-07	3.18685e-07	3.36333e-07	3.41102e-07	3.41282e-07
1684.92	8.656	1.60059e-07	1.45709e-07	1.62731e-07	1.55864e-07	1.40563e-07	1.47666e-07	1.56558e-07	1.34537e-07	1.46005e-07
1692.36	8.657	3.44709e-08	4.16826e-08	3.5258e-08	5.33452e-08	2.25785e-08	3.64821e-08	5.14903e-08	2.7764e-08	2.45111e-08
1699.8	8.659	1.41784e-08	1.0076e-08	9.8804e-09	2.04837e-08	8.28656e-09	2.68314e-09	1.96986e-08	1.17305e-08	2.30241e-08
1707.23	8.66	2.77333e-08	1.10286e-08	3.35267e-08	1.89654e-08	2.01264e-08	1.73613e-08	1.74055e-08	5.26207e-08	4.12217e-08
1714.67	8.662	3.55159e-08	1.61305e-08	1.55657e-08	8.85945e-09	4.90719e-09	1.33801e-08	1.48895e-08	1.22208e-08	1.54398e-08
1722.1	8.663	2.46835e-08	8.66994e-09	3.29497e-08	3.20901e-08	1.14513e-24	1.86225e-08	7.50238e-09	0	2.15815e-08
1729.54	8.664	7.23963e-09	1.98958e-08	7.44656e-09	0	0	0	1.06669e-24	0	1.02064e-24
1736.97	8.666	0	7.42292e-09	1.04929e-08	0	0	0	0	0	0
1744.41	8.667	0	5.37277e-09	0	0	0	0	0	0	0
1751.84	8.669	1.86997e-07	1.88212e-07	1.81561e-07	1.31245e-07	1.26488e-07	1.26974e-07	1.57071e-07	1.50672e-07	1.60935e-07
1759.27	8.67	2.56849e-07	2.7321e-07	2.79154e-07	1.86337e-07	1.89349e-07	1.74044e-07	2.12314e-07	2.24576e-07	2.29542e-07
1766.71	8.671	1.70271e-07	1.65312e-07	2.11482e-07	1.09521e-07	9.79262e-08	9.44579e-08	1.0903e-07	1.18996e-07	1.03794e-07
1774.14	8.673	3.83149e-08	4.05417e-08	5.81934e-08	3.56972e-08	3.144e-08	4.88486e-09	4.14459e-09	2.26748e-08	2.48741e-08
1781.57	8.674	1.42674e-08	1.87883e-08	9.60676e-09	1.4803e-08	1.58636e-08	9.95212e-09	1.50947e-08	7.7613e-09	5.10745e-08
1789.01	8.676	3.12679e-07	3.20435e-07	3.28859e-07	2.03115e-07	2.45993e-07	1.98285e-07	2.48652e-07	2.38513e-07	2.40679e-07
1796.44	8.677	1.44727e-07	1.21755e-07	1.97816e-07	9.80141e-08	4.9638e-08	1.00749e-07	1.34714e-07	9.72041e-08	8.53039e-08
1803.87	8.678	6.80287e-08	6.3918e-08	1.98563e-07	3.6504e-08	7.67713e-08	4.93906e-10	7.13014e-08	9.994e-08	3.29213e-08
1811.3	8.68	4.55423e-08	3.06663e-09	2.58566e-09	0	3.2541e-08	6.44026e-24	1.88353e-08	5.19027e-08	-1.1423e-24
1818.73	8.681	2.44013e-08	1.24092e-09	0	3.11597e-08	0	0	3.20457e-08	0	0
1826.16	8.683	0	1.69286e-09	1.92641e-08	0	0	0	0	0	0
1833.59	8.684	0	0	0	0	0	0	0	0	0
1841.02	8.685	0	0	0	0	0	0	0	0	0
1848.45	8.687	0	0	0	0	0	0	0	0	0
1855.88	8.688	0	0	0	0	0	0	0	0	0
1863.31	8.69	1.32708e-08	0	5.51245e-08	1.77228e-07	6.83543e-09	6.25349e-08	5.51712e-09	0	8.81648e-09
1870.73	8.691	3.43764e-06	1.40851e-06	9.86253e-07	2.77633e-06	1.05452e-06	6.91929e-07	3.05845e-06	1.22945e-06	8.73623e-07
1878.16	8.692	5.31963e-05	5.00511e-05	2.50614e-05	5.5233e-05	5.18068e-05	2.10516e-05	5.4113e-05	5.05906e-05	2.33434e-05
1885.59	8.694	4.0521e-05	3.54534e-05	2.10193e-05	4.0211e-05	3.47491e-05	1.81176e-05	4.0179e-05	3.48949e-05	1.95062e-05
1893.01	8.695	6.70038e-06	5.29788e-06	2.97038e-06	6.05371e-06	4.85822e-06	2.25394e-06	6.29248e-06	4.95727e-06	2.59251e-06
1900.44	8.697	1.83616e-06	1.64831e-06	4.19386e-07	1.66539e-06	1.30067e-06	3.14334e-07	1.6057e-06	1.35597e-06	3.22457e-07
1907.86	8.698	1.44579e-06	1.10317e-06	2.51962e-07	1.14743e-06	9.75639e-07	2.0649e-07	1.08248e-06	1.00513e-06	3.66212e-07
1915.29	8.699	6.91982e-07	5.46586e-07	2.87805e-07	5.69033e-07	3.77919e-07	1.72905e-07	5.83169e-07	5.04485e-07	1.96546e-07
1922.71	8.701	7.80553e-07	6.6858e-07	4.06752e-07	4.75461e-07	5.04387e-07	2.08947e-07	6.18744e-07	5.50502e-07	2.81038e-07
1930.14	8.702	7.96181e-07	7.16557e-07	6.23774e-07	5.74603e-07	4.97354e-07	4.01556e-07	5.84184e-07	5.32528e-07	4.19372e-07
1937.56	8.704	2.99044e-05	2.59027e-05	1.80744e-05	2.13749e-05	1.95302e-05	1.60241e-05	2.45822e-05	2.18315e-05	1.62573e-05
1944.98	8.705	0.000424609	0.000422544	0.000404437	0.000373116	0.000375349	0.000367011	0.000393945	0.000393839	0.000379673
1952.41	8.706	0.0011794	0.00117005	0.00112505	0.00114647	0.00115393	0.00114336	0.00115626	0.00115505	0.00112543
1959.83	8.708	0.00116856	0.00112362	0.00106215	0.00118346	0.00113888	0.00108093	0.00117002	0.00112523	0.00106391
1967.25	8.709	0.00100259	0.000985984	0.000962132	0.0010283	0.00101319	0.000991523	0.00101118	0.000995286	0.000971753
1974.67	8.711	0.000309975	0.000305136	0.000297924	0.000298153	0.000294162	0.000289275	0.000302337	0.000298018	0.000291943
1982.09	8.712	7.68669e-05	7.49685e-05	7.11749e-05	6.67071e-05	6.52569e-05	6.22971e-05	7.07546e-05	6.90879e-05	6.57401e-05
1989.52	8.714	4.7133e-05	4.70332e-05	4.69972e-05	4.28465e-05	4.26829e-05	4.26062e-05	4.4347e-05	4.42317e-05	4.40942e-05
1996.94	8.715	0.000597682	0.00059938	0.00060635	0.000565435	0.000568211	0.000576	0.000578179	0.000580585	0.000588153
2004.35	8.716	0.00361381	0.00358514	0.00352808	0.00366549	0.00363607	0.00358054	0.00362248	0.00359315	0.00353598
2011.77	8.718	0.00277339	0.0027649	0.00275132	0.00282266	0.0028144	0.00280167	0.00278806	0.00277973	0.00276635
2019.19	8.719	0.00173712	0.00173715	0.00173183	0.00166894	0.00166744	0.00166125	0.00169274	0.00169179	0.00168604
2026.61	8.721	0.000634363	0.00063894	0.000645238	0.000553402	0.000556879	0.000561593	0.000586407	0.000590314	0.000595804
2034.03	8.722	0.000307031	0.000306047	0.000304777	0.000276767	0.000276131	0.000275231	0.000288123	0.000287335	0.000286247
2041.45	8.723	0.000313062	0.000312826	0.000312598	0.00031056	0.00031035	0.000310017	0.000310139	0.00030988	0.000309648
2048.86	8.725	0.00064905	0.000648257	0.000646638	0.000637371	0.000636701	0.000635438	0.000640055	0.00063939	0.000637946
2056.28	8.726	0.000966066	0.000967156	0.0009689	0.00100956	0.00101101	0.0010135	0.000985355	0.000986505	0.000988568
2063.7	8.727	0.000763484	0.000765443	0.000768752	0.000798389	0.000800792	0.00080495	0.000778784	0.000780953	0.000784589
2071.11	8.729	0.00072494	0.000724123	0.000722423	0.000697425	0.000696596	0.000694948	0.000706516	0.000705728	0.000704097
2078.53	8.73	0.00040946	0.000407667	0.000404564	0.00037384	0.00037213	0.000369116	0.000388063	0.000386315	0.000383291
2085.94	8.732	0.000329688	0.000329567	0.000329326	0.000291253	0.000291196	0.000291087	0.000306539	0.000306438	0.000306295
2093.36	8.733	0.00016494	0.000164903	0.000164735	0.000139331	0.000139269	0.000139138	0.000149451	0.000149417	0.000149239
2100.77	8.734	6.43157e-05	6.40936e-05	6.37283e-05	5.68206e-05	5.65647e-05	5.6153e-05	5.95075e-05	5.92808e-05	5.8858e-05
2108.18	8.736	2.82056e-05	2.81202e-05	2.79618e-05	2.58857e-05	2.57746e-05	2.55885e-05	2.6563e-05	2.64645e-05	2.63107e-05
2115.59	8.737	2.34929e-05	2.34654e-05	2.3325e-05	2.19075e-05	2.18763e-05	2.17461e-05	2.23388e-05	2.22953e-05	2.21996e-05
2123.01	8.739	5.16226e-06	5.16742e-06	5.15273e-06	4.14377e-06	4.17562e-06	4.1704e-06	4.55439e-06	4.61759e-06	4.58834e-06
2130.42	8.74	2.55655e-06	2.53764e-06	2.54688e-06	2.09849e-06	2.10472e-06	2.10319e-06	2.37277e-06	2.3841e-06	2.39276e-06
2137.83	8.741	1.96455e-06	1.94399e-06	1.94017e-06	1.65467e-06	1.70751e-06	1.67019e-06	1.74551e-06	1.74322e-06	1.75178e-06
2145.24	8.743	9.38789e-06	9.3576e-06	9.35213e-06	9.0657e-06	9.04157e-06	9.03084e-06	9.14398e-06	9.1138e-06	9.11382e-06
2152.65	8.744	1.46379e-05	1.46334e-05	1.45793e-05	1.52998e-05	1.52852e-05	1.52174e-05	1.49436e-05	1.49299e-05	1.48775e-05
2160.06	8.746	1.27371e-05	1.27046e-05	1.26386e-05	1.29216e-05	1.29279e-05	1.28723e-05	1.27793e-05	1.27209e-05	1.27118e-05
2167.47	8.747	9.47832e-06	9.47429e-06	9.46076e-06	9.20827e-06	9.1919e-06	9.19007e-06	9.30137e-06	9.28937e-06	9.26951e-06
2174.88	8.748	3.3978e-06	3.43781e-06	3.4664e-06	3.24834e-06	3.26886e-06	3.28665e-06	3.35324e-06	3.34161e-06	3.36832e-06
2182.28	8.75	7.39955e-07	7.44627e-07	7.29883e-07	6.62438e-07	6.5278e-07	6.52318e-07	6.80621e-07	6.8724e-07	7.34003e-07
2189.69	8.751	9.41907e-07	9.84102e-07	1.0112e-06	9.15701e-07	8.95375e-07	9.14432e-07	9.46794e-07	9.04041e-07	9.53296e-07
2197.1	8.753	3.24118e-07	4.01623e-07	3.59791e-07	2.54848e-07	3.18298e-07	2.5617e-07	3.08664e-07	2.88163e-07	3.61482e-07
2204.5	8.754	8.28316e-08	6.86129e-08	1.05064e-07	8.36087e-08	2.66462e-08	8.68735e-08	6.62859e-08	9.24054e-08	1.03699e-07
2211.91	8.755	3.5371e-07	3.30795e-07	3.41776e-07	3.43014e-07	3.23388e-07	3.24158e-07	3.06325e-07	3.53292e-07	3.29081e-07
2219.31	8.757	1.758e-07	1.64808e-07	1.38258e-07	1.63285e-07	1.6447e-07	1.67808e-07	1.27271e-07	2.17519e-07	2.01707e-07
2226.72	8.758	1.64844e-07	2.5334e-07	1.6574e-07	1.62442e-07	1.7899e-07	1.70155e-07	2.05364e-07	1.8111e-07	1.63421e-07
2234.12	8.76	1.02836e-07	6.21381e-08	6.58451e-08	4.7167e-08	8.003e-08	5.73551e-08	7.28907e-08	6.42654e-08	3.34625e-08
2241.53	8.761	2.24575e-08	1.7436e-08	1.07203e-08	1.84345e-08	5.18913e-08	3.27074e-08	1.95734e-08	1.71601e-08	0
2248.93	8.763	1.58958e-07	1.03085e-07	1.37448e-07	1.15049e-07	1.43138e-07	1.11407e-07	1.19059e-07	1.43591e-07	1.22524e-07
2256.33	8.764	1.60738e-07	2.11647e-07	1.72102e-07	1.97868e-07	2.23588e-07	1.97837e-07	2.03722e-07	1.57234e-07	2.1191e-07
2263.73	8.765	3.6655e-08	8.88273e-08	5.20369e-08	6.54624e-08	3.28753e-08	9.2393e-08	5.13957e-08	4.50706e-08	6.56391e-08
2271.14	8.767	6.38339e-08	7.04432e-08	4.79618e-08	3.47337e-08	9.87177e-09	4.82888e-08	8.25043e-08	1.39007e-08	4.91551e-08
2278.54	8.768	5.59309e-08	1.32517e-07	8.35775e-08	6.09775e-08	3.85643e-08	4.43221e-08	5.0265e-08	1.20615e-07	7.36745e-08
2285.94	8.77	2.29966e-08	8.41577e-09	1.48036e-08	3.42615e-08	0	2.08177e-08	2.336e-08	0	7.48597e-08
2293.34	8.771	3.5084e-08	0	4.86743e-08	0	1.09174e-08	1.41654e-08	5.39929e-08	0	3.59027e-08
2300.74	8.772	0	0	0	3.35474e-08	0	1.59776e-08	0	0	0
2308.14	8.774	0	0	0	1.88173e-08	1.88972e-08	1.7077e-08	0	0	2.64174e-08
2315.53	8.775	0	0	0	0	1.5892e-08	0	0	0	2.97316e-08
2322.93	8.777	0	0	0	0	0	0	0	0	0
2330.33	8.778	0	0	0	0	0	0	0	0	0
2337.73	8.779	0	0	0	0	0	0	0	0	0
2345.12	8.781	9.15185e-09	0	0	0	0	0	0	0	0
2352.52	8.782	8.37806e-09	0	0	0	0	0	0	0	0
2359.91	8.783	0	0	0	0	0	0	1.21959e-08	0	0
2367.31	8.785	0	3.24584e-08	0	0	0	0	0	0	0
2374.7	8.786	0	2.939e-08	0	0	0	0	0	0	0
2382.09	8.788	0	0	0	0	0	0	0	0	0
2389.49	8.789	0	0	0	0	0	0	0	0	0
2396.88	8.79	0	0	3.02348e-09	0	0	0	0	0	0
2404.27	8.792	0	0	0	1.11416e-08	0	3.13168e-08	2.38855e-08	0	0
2411.66	8.793	0	0	0	7.4034e-09	0	0	0	0	0
2419.05	8.795	0	0	6.33922e-09	3.38892e-08	0	0	0	0	4.56078e-10
2426.44	8.796	0	1.34946e-24	0	0	0	1.51177e-08	0	0	0
2433.83	8.797	0	0	0	0	0	0	0	1.61507e-09	5.57104e-08
2441.22	8.799	2.25906e-08	0	0	2.02602e-08	0	3.33313e-08	2.22268e-08	0	0
2448.61	8.8	0	2.3132e-25	0	2.86995e-08	0	0	3.22743e-08	7.23188e-08	0
2455.99	8.802	0	4.50716e-08	0	0	0	4.67837e-08	3.2585e-08	5.8862e-08	0
2463.38	8.803	3.75224e-08	3.99233e-08	6.64877e-08	0	4.54352e-09	3.98063e-08	0	0	0
2470.77	8.804	1.07119e-07	1.96366e-07	1.29598e-08	8.85074e-08	6.34908e-08	1.70931e-07	9.888e-08	1.10579e-07	1.17599e-08
2478.15	8.806	3.37926e-07	2.85426e-07	1.42262e-07	2.71124e-07	1.77077e-07	2.24309e-07	2.15095e-07	2.65173e-07	1.10529e-07
2485.54	8.807	5.93879e-06	5.89888e-06	5.92141e-06	4.61854e-06	4.51322e-06	4.50654e-06	5.05557e-06	5.0937e-06	5.06165e-06
2492.92	8.809	2.15818e-06	2.22691e-06	2.38057e-06	1.91959e-06	2.02352e-06	2.18503e-06	1.9941e-06	2.04861e-06	2.10995e-06

## Sheet: k_PRISMA
Wavelength	FWHM	k_Summer_L	k_Summer_M	k_Summer_H	k_Winter_L	k_Winter_M	k_Winter_H	k_1976_L	k_1976_M	k_1976_H
943.093	11.1634	1.85703e-09	1.75045e-10	0	2.32082e-09	1.98058e-09	2.57547e-09	1.73243e-09	0	3.13287e-09
951.123	11.2245	1.21826e-09	0	0	0	1.11871e-09	2.75752e-09	9.63346e-10	0	2.91558e-09
959.679	12.4243	0	0	0	0	0	0	0	0	0
969.494	12.4752	0	0	0	0	0	0	0	0	0
978.688	12.2031	0	0	0	0	0	0	0	0	0
988.394	12.4208	0	0	0	0	0	0	0	0	0
998.492	13.0605	0	0	0	0	0	0	0	0	0
1008.29	12.7977	0	0	0	0	0	0	0	0	0
1018.18	13.3457	0	0	0	0	0	0	0	0	0
1028.97	13.3271	0	0	0	0	0	0	0	0	0
1038.22	13.3406	4.32879e-07	4.27971e-07	4.23885e-07	4.29001e-07	4.35799e-07	4.42422e-07	4.29931e-07	4.31761e-07	4.3085e-07
1047.9	13.6246	9.28908e-07	9.27449e-07	9.21768e-07	9.48632e-07	9.51764e-07	9.4872e-07	9.28253e-07	9.25805e-07	9.26661e-07
1057.87	13.8052	4.88704e-07	4.8488e-07	4.80971e-07	4.84328e-07	4.72429e-07	4.72483e-07	4.7829e-07	4.8445e-07	4.70568e-07
1068.11	14.0138	2.05959e-07	2.00678e-07	1.95685e-07	1.97665e-07	1.95893e-07	2.05424e-07	2.02114e-07	1.98564e-07	1.91692e-07
1078.56	14.1443	2.26731e-08	2.49326e-08	2.28968e-08	1.69078e-08	1.23987e-08	1.96451e-08	1.76995e-08	1.94951e-08	2.31695e-08
1089.09	14.237	1.13415e-09	3.18519e-09	6.67041e-10	3.17382e-09	0	6.83694e-10	0	1.13798e-09	1.13451e-09
1099.62	14.2462	8.03496e-10	0	5.61258e-10	4.24037e-25	0	5.1711e-10	0	0	1.0213e-09
1110.27	14.509	0	7.91353e-10	0	0	0	1.91089e-09	1.8398e-09	0	0
1121.01	14.2789	0	1.144e-09	0	0	0	0	1.64652e-09	0	0
1131.68	14.4797	2.76056e-09	0	7.17462e-10	3.06843e-09	0	6.05226e-10	0	0	0
1142.36	14.3065	0	0	0	0	0	0	0	0	0
1153	14.5513	0	0	0	0	0	0	1.82268e-09	0	0
1164.03	14.8343	0	0	0	0	0	0	0	0	0
1175.07	14.4813	0	0	0	0	0	0	0	0	0
1185.9	14.5792	0	0	0	0	0	0	0	0	0
1196.7	14.5482	3.05136e-06	2.73443e-06	2.40847e-06	2.95298e-06	2.63221e-06	2.30184e-06	2.98384e-06	2.66482e-06	2.34314e-06
1207.6	14.6949	2.73078e-05	2.67715e-05	2.62665e-05	2.75123e-05	2.6965e-05	2.64703e-05	2.72841e-05	2.67387e-05	2.62528e-05
1218.23	14.5848	1.85344e-05	1.87418e-05	1.90597e-05	1.87479e-05	1.89511e-05	1.9294e-05	1.85746e-05	1.87811e-05	1.91101e-05
1229.48	15.038	6.6058e-06	6.61057e-06	6.61139e-06	6.34502e-06	6.3554e-06	6.34838e-06	6.42093e-06	6.41588e-06	6.40966e-06
1240.57	14.5454	5.74822e-07	5.62682e-07	5.6772e-07	5.47477e-07	5.48958e-07	5.47723e-07	5.55721e-07	5.57841e-07	5.54342e-07
1251.35	14.976	1.57602e-07	1.54346e-07	1.61564e-07	1.55009e-07	1.6284e-07	1.5779e-07	1.62275e-07	1.56087e-07	1.56014e-07
1262.86	15.0231	2.206e-07	2.20399e-07	2.19368e-07	2.14987e-07	2.23055e-07	2.28868e-07	2.27852e-07	2.16767e-07	2.0936e-07
1273.81	14.6921	8.04376e-09	1.25233e-08	6.83182e-09	8.20106e-09	1.09928e-08	1.48177e-08	8.52867e-09	5.08942e-09	5.39754e-09
1284.76	14.6612	6.97488e-07	6.87581e-07	6.84967e-07	6.76989e-07	6.69647e-07	6.72601e-07	6.80034e-07	6.66637e-07	6.6396e-07
1295.65	14.6497	1.55999e-06	1.57262e-06	1.59749e-06	1.58302e-06	1.5903e-06	1.6045e-06	1.56951e-06	1.57011e-06	1.59677e-06
1306.5	14.6907	4.23451e-07	4.10353e-07	3.70095e-07	4.05889e-07	3.72151e-07	3.43797e-07	4.12243e-07	3.83494e-07	3.54943e-07
1317.47	14.8011	6.13942e-06	6.12899e-06	6.10274e-06	6.19667e-06	6.21258e-06	6.18218e-06	6.13711e-06	6.14645e-06	6.11002e-06
1328.54	14.8526	5.70256e-07	6.00461e-07	6.32673e-07	4.93345e-07	5.2356e-07	5.62615e-07	5.24643e-07	5.6021e-07	5.80741e-07
1339.4	14.642	2.71584e-06	2.70283e-06	2.64895e-06	2.73738e-06	2.77272e-06	2.71467e-06	2.71621e-06	2.71989e-06	2.65522e-06
1350.04	14.7152	1.18864e-06	1.57326e-06	2.07908e-06	1.08292e-06	1.57931e-06	2.02578e-06	1.13117e-06	1.58168e-06	2.00042e-06
1361.33	15.4178	1.27748e-08	2.46213e-08	1.43645e-08	4.97636e-08	5.1846e-09	1.99483e-09	2.0292e-08	2.01136e-08	1.29666e-08
1373.13	14.528	2.71295e-07	1.95242e-07	9.47005e-08	2.16931e-07	2.06379e-07	7.22957e-08	2.66566e-07	2.02974e-07	6.80939e-08
1383.51	15.022	5.61909e-08	6.01357e-08	2.20359e-08	4.70328e-08	5.17798e-08	1.00112e-08	7.9586e-08	4.20073e-08	1.50813e-08
1394.92	14.3512	1.67383e-08	7.97134e-09	3.33954e-09	2.45079e-09	0	0	1.92206e-08	0	7.88166e-09
1405.76	14.603	0	7.36021e-10	0	1.08356e-09	0	0	0	1.22642e-10	0
1416.7	14.4414	5.76864e-09	2.60591e-10	1.5479e-08	8.96366e-10	1.03286e-10	9.79419e-09	2.69687e-09	3.10486e-11	4.68369e-10
1427.45	14.3086	8.38241e-05	7.21328e-05	6.25529e-05	8.60305e-05	7.41495e-05	6.35847e-05	8.49606e-05	7.31823e-05	6.28689e-05
1438.5	14.7756	0.000256038	0.000245487	0.000226785	0.000256645	0.000246036	0.000229832	0.000254994	0.000244308	0.000226153
1449.25	14.0094	4.2846e-05	4.06731e-05	3.6512e-05	3.70787e-05	3.54867e-05	3.20086e-05	3.92433e-05	3.73915e-05	3.35404e-05
1459.41	13.9458	1.34919e-06	1.32482e-06	1.24021e-06	9.05427e-07	9.26028e-07	8.44181e-07	1.04207e-06	1.03481e-06	9.97848e-07
1470.03	14.5203	6.70702e-06	6.13997e-06	5.05058e-06	6.86604e-06	6.39628e-06	5.39568e-06	6.75852e-06	6.23999e-06	5.20719e-06
1480.99	14.3435	6.18866e-06	5.94454e-06	5.64994e-06	6.14553e-06	5.91691e-06	5.6138e-06	6.13862e-06	5.89463e-06	5.61678e-06
1491.53	14.1138	2.3367e-06	2.44435e-06	2.65785e-06	2.25625e-06	2.36826e-06	2.56018e-06	2.29096e-06	2.38638e-06	2.60682e-06
1502.1	14.2618	1.45964e-06	1.46816e-06	1.48049e-06	1.44607e-06	1.45637e-06	1.47839e-06	1.4415e-06	1.44326e-06	1.47467e-06
1512.73	14.1849	1.9672e-08	3.39213e-08	2.32034e-08	2.62302e-08	1.459e-08	2.70151e-08	1.90259e-08	2.39699e-08	2.92434e-08
1523.31	14.1186	2.77065e-06	2.78947e-06	2.82502e-06	2.42137e-06	2.43498e-06	2.46251e-06	2.53279e-06	2.56132e-06	2.59067e-06
1533.88	14.0897	2.9902e-05	2.99754e-05	3.01369e-05	3.01324e-05	3.01933e-05	3.03173e-05	2.98779e-05	2.99423e-05	3.00911e-05
1544.35	13.9804	1.65894e-05	1.65603e-05	1.65476e-05	1.6687e-05	1.66879e-05	1.66701e-05	1.65638e-05	1.65494e-05	1.65446e-05
1554.88	14.0528	3.76489e-07	3.67336e-07	3.72873e-07	3.44477e-07	3.42081e-07	3.38321e-07	3.49707e-07	3.53031e-07	3.58413e-07
1565.38	13.924	5.22518e-05	5.22835e-05	5.23423e-05	5.00823e-05	5.01049e-05	5.01698e-05	5.07964e-05	5.08213e-05	5.08817e-05
1575.67	13.7729	0.000191957	0.000191956	0.000191923	0.000195263	0.000195237	0.000195223	0.000192873	0.000192872	0.000192838
1585.92	13.7984	4.4024e-05	4.40068e-05	4.39653e-05	4.22303e-05	4.22114e-05	4.21893e-05	4.27838e-05	4.27821e-05	4.27436e-05
1596.24	13.7969	5.86884e-05	5.87263e-05	5.88426e-05	5.79673e-05	5.80082e-05	5.81082e-05	5.8015e-05	5.80593e-05	5.81714e-05
1606.5	13.7232	0.000183106	0.000183085	0.00018304	0.000188458	0.000188449	0.00018841	0.000185273	0.000185242	0.000185214
1616.86	13.8942	5.53635e-05	5.53699e-05	5.53361e-05	5.15041e-05	5.1518e-05	5.15004e-05	5.29116e-05	5.28928e-05	5.29006e-05
1627.04	13.4867	4.53892e-06	4.55425e-06	4.55744e-06	3.99371e-06	4.0004e-06	3.99012e-06	4.21403e-06	4.21852e-06	4.22127e-06
1637.06	13.4903	1.6357e-05	1.63719e-05	1.63454e-05	1.62508e-05	1.62525e-05	1.62263e-05	1.62163e-05	1.62275e-05	1.62163e-05
1647.21	13.4457	3.08316e-05	3.08574e-05	3.08801e-05	3.18024e-05	3.18142e-05	3.18483e-05	3.12617e-05	3.1279e-05	3.13009e-05
1656.95	12.8478	8.25796e-06	8.25998e-06	8.22241e-06	7.59214e-06	7.58114e-06	7.57528e-06	7.80944e-06	7.81067e-06	7.79595e-06
1667.11	13.578	2.17314e-06	2.16664e-06	2.17702e-06	1.77618e-06	1.78088e-06	1.78762e-06	1.93883e-06	1.93841e-06	1.94977e-06
1677.32	13.0764	4.66044e-07	4.44726e-07	4.59041e-07	3.93177e-07	4.04994e-07	3.9542e-07	4.12104e-07	4.18368e-07	4.21235e-07
1687.34	13.101	1.17714e-07	1.07979e-07	1.18245e-07	1.13692e-07	9.29371e-08	1.12644e-07	1.2265e-07	9.49515e-08	1.03977e-07
1697.21	13.2224	1.67767e-08	2.11861e-08	1.78275e-08	3.65184e-08	1.047e-08	1.62066e-08	2.65839e-08	1.69033e-08	1.65039e-08
1707.02	13.2015	3.21865e-08	1.51302e-08	3.3918e-08	1.66696e-08	1.41476e-08	1.69832e-08	2.24525e-08	3.60472e-08	3.77763e-08
1716.81	12.9751	2.77986e-08	8.78185e-09	2.9283e-08	1.96251e-08	3.21222e-09	1.8114e-08	8.71577e-09	4.35737e-09	1.99589e-08
1726.58	12.8046	1.94514e-08	1.48359e-08	2.42722e-08	8.37025e-09	0	3.61662e-09	9.15015e-09	0	6.02282e-09
1736.38	12.8313	0	2.98069e-09	7.08647e-09	0	0	0	0	0	0
1746.1	13.0023	0	0	0	0	0	0	0	2.82108e-09	0
1755.77	13.0233	2.61873e-07	2.62018e-07	2.59654e-07	1.85027e-07	1.77712e-07	1.70583e-07	2.11055e-07	2.20667e-07	2.25266e-07
1765.44	12.6574	1.96388e-07	1.92954e-07	2.22959e-07	1.25914e-07	1.24813e-07	1.09981e-07	1.34533e-07	1.50625e-07	1.43459e-07
1775.04	12.4278	2.9694e-08	3.42458e-08	5.44962e-08	3.14112e-08	2.45683e-08	3.55663e-09	1.7973e-08	2.43729e-08	2.54775e-08
1784.57	12.6008	1.74126e-07	1.73675e-07	1.51659e-07	1.28391e-07	1.39571e-07	1.16091e-07	1.43346e-07	1.43824e-07	1.46486e-07
1793.88	12.697	1.92178e-07	1.63993e-07	2.4294e-07	1.23589e-07	1.15364e-07	1.27926e-07	1.56554e-07	1.31808e-07	1.51204e-07
1803.51	12.5221	7.35182e-08	6.48992e-08	1.45084e-07	5.32501e-08	5.95001e-08	1.7798e-08	6.19282e-08	8.40805e-08	8.01852e-08
1812.93	12.2902	3.78875e-08	0	2.56797e-10	1.83061e-08	2.87334e-08	1.03065e-10	4.90614e-08	5.24537e-08	1.26031e-08
1822.29	12.8994	2.16524e-09	1.22903e-08	0	3.80194e-08	0	0	1.47252e-08	0	0
1831.86	12.321	0	0	0	4.55376e-08	0	0	0	0	0
1841.17	12.4709	0	0	0	0	0	0	0	0	0
1850.44	12.3586	0	0	0	0	0	0	0	0	0
1859.48	12.2035	3.56211e-09	0	2.57421e-09	9.23229e-09	-5.91981e-25	-2.58567e-09	0	0	4.19657e-09
1868.14	11.3546	9.68558e-08	8.93989e-08	2.1048e-07	1.84501e-07	5.3351e-08	1.78973e-07	1.14902e-07	6.92542e-08	1.44123e-07
1878.47	12.6107	5.82829e-05	5.48156e-05	2.58786e-05	5.99273e-05	5.61673e-05	2.13072e-05	5.89103e-05	5.51434e-05	2.38961e-05
1886.94	11.5635	3.6823e-05	3.26155e-05	1.86574e-05	3.66175e-05	3.20497e-05	1.60179e-05	3.6516e-05	3.21115e-05	1.73041e-05
1895.88	11.5962	4.59621e-06	3.77303e-06	1.89347e-06	3.96871e-06	3.19944e-06	1.36408e-06	4.17289e-06	3.3878e-06	1.57955e-06
1904.73	12.5711	1.37278e-06	1.01739e-06	2.30051e-07	1.11003e-06	8.81681e-07	2.07382e-07	1.103e-06	9.23646e-07	2.77604e-07
1914.15	11.7418	8.63039e-07	6.59365e-07	2.5104e-07	6.44277e-07	4.71581e-07	1.62247e-07	6.8072e-07	6.00996e-07	2.15064e-07
1923.18	12.0039	7.64913e-07	6.61882e-07	3.76364e-07	4.64483e-07	5.05856e-07	2.2003e-07	5.95202e-07	5.42708e-07	2.62478e-07
1932.06	11.6661	3.90805e-06	4.78596e-06	4.63956e-06	2.63754e-06	3.32362e-06	3.76638e-06	3.0388e-06	3.75213e-06	3.94751e-06
1940.92	11.8169	0.00018407	0.00022678	0.000271327	0.000149432	0.000181719	0.000222444	0.000163537	0.000200047	0.000242202
1949.71	11.5385	0.000867114	0.000910459	0.000935085	0.000813515	0.000865033	0.000916149	0.000834353	0.000881414	0.000918395
1958.44	11.4733	0.00132785	0.00127893	0.00119282	0.00134632	0.00130413	0.00123516	0.00133059	0.00128505	0.00120516
1967.13	11.5707	0.000977298	0.00096605	0.000949232	0.000997087	0.000987444	0.000973638	0.000982904	0.000972433	0.000956456
1975.83	11.4434	0.000269082	0.000268068	0.000263296	0.000255878	0.000255676	0.000253081	0.000260782	0.000260232	0.000256553
1984.58	11.6345	5.32997e-05	5.21913e-05	5.04189e-05	4.64685e-05	4.5475e-05	4.39903e-05	4.91077e-05	4.80582e-05	4.64057e-05
1993.29	11.3157	0.000204412	0.000201476	0.000198181	0.000191192	0.000188709	0.000186078	0.000196287	0.000193649	0.000190646
2001.88	11.4422	0.00209708	0.00209724	0.00209315	0.00202119	0.00202226	0.00202039	0.00205102	0.00205157	0.00204841
2010.46	11.2577	0.00283414	0.00281568	0.00278654	0.00287939	0.00286228	0.00283542	0.00284691	0.00282912	0.00280082
2019.09	11.3366	0.00173774	0.00173272	0.00172041	0.00166842	0.00166308	0.00165119	0.00169302	0.00168768	0.00167552
2027.54	11.1218	0.000577738	0.000580438	0.000584313	0.000505114	0.000507177	0.000510005	0.000534582	0.000536898	0.000540231
2036.04	11.2636	0.000297225	0.000295899	0.000294019	0.000275556	0.000274562	0.000272943	0.000283339	0.000282143	0.000280388
2044.46	11.0174	0.000396946	0.000398543	0.000401591	0.000390095	0.000391255	0.000393479	0.000391478	0.00039285	0.000395496
2052.82	11.071	0.00100943	0.00100809	0.00100564	0.00103289	0.0010315	0.00102894	0.00101792	0.00101656	0.001014
2061.17	10.9786	0.000748414	0.000749141	0.00075024	0.000786105	0.00078734	0.000789326	0.000765308	0.000766263	0.00076769
2069.56	11.1227	0.000786681	0.000786587	0.000786371	0.000772736	0.000772544	0.000772175	0.000775345	0.000775203	0.000774944
2077.8	10.9102	0.000447398	0.000445874	0.00044322	0.00041135	0.000409876	0.000407289	0.000425672	0.000424164	0.000421574
2086.15	11.0754	0.00031763	0.000317427	0.000317032	0.000280254	0.000280118	0.000279903	0.000295112	0.000294926	0.000294649
2094.44	10.8328	0.000148442	0.00014866	0.00014889	0.00012579	0.000125913	0.0001261	0.000134699	0.000134874	0.000135038
2102.57	10.8621	5.03952e-05	5.00501e-05	4.949e-05	4.44726e-05	4.4123e-05	4.35619e-05	4.65693e-05	4.62486e-05	4.5655e-05
2110.82	10.851	2.86696e-05	2.86037e-05	2.84236e-05	2.68991e-05	2.68048e-05	2.66051e-05	2.73464e-05	2.7249e-05	2.71058e-05
2118.99	10.8112	1.3499e-05	1.34956e-05	1.34612e-05	1.20398e-05	1.2047e-05	1.20372e-05	1.24351e-05	1.24766e-05	1.24425e-05
2127.12	10.6388	2.99227e-06	2.98587e-06	2.99868e-06	2.28636e-06	2.32505e-06	2.30456e-06	2.71805e-06	2.74343e-06	2.74238e-06
2135.24	10.7428	1.96551e-06	1.95096e-06	1.94698e-06	1.73669e-06	1.75603e-06	1.74642e-06	1.83232e-06	1.84408e-06	1.85516e-06
2143.22	10.5323	5.31196e-06	5.29537e-06	5.29041e-06	4.99019e-06	5.00264e-06	4.96507e-06	5.06288e-06	5.04157e-06	5.04294e-06
2151.13	10.577	1.66371e-05	1.66348e-05	1.66275e-05	1.70075e-05	1.69932e-05	1.69898e-05	1.67618e-05	1.67664e-05	1.6753e-05
2159.29	10.8203	1.1708e-05	1.16671e-05	1.16159e-05	1.19239e-05	1.19115e-05	1.18609e-05	1.17757e-05	1.17281e-05	1.17002e-05
2167.24	10.2622	9.82392e-06	9.80738e-06	9.78947e-06	9.56673e-06	9.54137e-06	9.5287e-06	9.64917e-06	9.64067e-06	9.60496e-06
2175.09	10.6874	3.50242e-06	3.53223e-06	3.56775e-06	3.34002e-06	3.3578e-06	3.37815e-06	3.44086e-06	3.44647e-06	3.46754e-06
2183.15	10.3148	8.03416e-07	8.06865e-07	7.96891e-07	7.34532e-07	7.25657e-07	7.23921e-07	7.53046e-07	7.58951e-07	7.92952e-07
2190.83	10.3889	8.57911e-07	9.07494e-07	9.24606e-07	8.20148e-07	8.13392e-07	8.0956e-07	8.50662e-07	8.08213e-07	8.64492e-07
2198.86	10.5417	2.53264e-07	3.04895e-07	2.8466e-07	2.03819e-07	2.36433e-07	2.24331e-07	2.35019e-07	2.23145e-07	2.65484e-07
2206.59	10.1254	1.53522e-07	1.23765e-07	1.69126e-07	1.53548e-07	8.98038e-08	1.70662e-07	1.25817e-07	1.62191e-07	1.48049e-07
2214.33	10.3834	2.95548e-07	2.6841e-07	2.62662e-07	2.74457e-07	2.73377e-07	3.01205e-07	2.4022e-07	3.19819e-07	2.88216e-07
2222.15	10.1301	1.97434e-07	2.24572e-07	1.50668e-07	1.90345e-07	1.80059e-07	1.7561e-07	1.66504e-07	2.21447e-07	2.26433e-07
2229.74	10.3142	1.17594e-07	1.84767e-07	1.38504e-07	1.04973e-07	1.18124e-07	1.21899e-07	1.54497e-07	1.24194e-07	9.44024e-08
2237.62	10.273	5.86166e-08	2.8984e-08	2.63614e-08	8.89348e-09	5.57998e-08	3.21423e-08	4.64175e-08	1.57777e-08	2.37267e-08
2245.2	10.1004	6.71732e-08	3.48063e-08	6.54463e-08	5.95081e-08	7.47382e-08	6.03268e-08	4.35636e-08	5.59102e-08	3.91312e-08
2252.83	10.165	2.07106e-07	1.84099e-07	1.82712e-07	1.85759e-07	2.095e-07	1.86475e-07	1.98573e-07	1.9761e-07	2.12728e-07
2260.58	10.1894	8.33797e-08	1.51324e-07	1.09393e-07	1.46348e-07	8.96291e-08	1.57973e-07	1.35842e-07	9.12134e-08	1.08856e-07
2268.02	9.94387	3.74029e-08	6.39212e-08	4.19536e-08	2.76539e-08	1.14962e-08	5.17959e-08	3.61792e-08	1.0107e-08	6.01303e-08
2275.74	10.1886	5.05119e-08	1.35447e-07	9.93929e-08	5.20466e-08	3.85476e-08	7.19013e-08	9.09839e-08	1.15613e-07	6.8685e-08
2283.2	9.78521	1.76358e-08	4.30692e-08	1.66634e-08	5.72229e-08	8.4271e-09	2.41052e-08	2.00659e-08	2.58849e-08	9.84837e-08
2290.54	10.0038	1.27801e-08	1.81746e-08	5.81525e-08	1.5687e-08	0	1.81608e-08	5.25154e-08	0	2.24495e-08
2298.27	9.97127	9.50714e-09	0	2.18238e-08	0	0	0	1.74708e-08	0	0
2305.44	9.63447	0	0	0	1.54497e-08	0	0	0	0	1.69853e-08
2312.87	10.1359	0	0	0	0	1.87231e-08	0	5.02439e-09	0	3.54812e-08
2320.56	9.74905	0	0	4.42014e-08	0	-5.85354e-24	1.21347e-08	8.29789e-09	0	0
2327.54	9.65826	0	0	4.4727e-08	0	0	1.54073e-08	0	0	0
2335.15	10.0542	0	1.35773e-08	0	0	0	0	0	0	0
2342.53	9.56876	0	1.41923e-08	0	0	0	0	0	0	0
2349.51	9.55708	0	0	0	2.82642e-08	0	0	0	0	0
2356.96	9.92805	0	0	0	0	0	0	0	0	0
2364.29	9.46855	0	0	2.01209e-08	0	0	0	0	0	0
2371.27	9.49267	0	0	0	0	0	0	0	0	0
2378.44	9.61255	0	0	0	0	0	2.72046e-08	0	0	0
2385.73	9.63909	3.14687e-08	0	0	0	0	2.98364e-08	0	0	0
2392.76	9.29032	0	0	0	0	0	0	0	0	0
2399.73	9.60672	0	0	3.48004e-08	0	0	2.63803e-08	6.28988e-09	0	0
2407.24	9.64439	0	0	1.84022e-08	2.10979e-08	0	0	9.59895e-09	0	0
2414.09	8.96147	0	0	0	0	0	0	0	0	0
2420.91	9.61238	1.58233e-08	0	0	0	0	0	0	0	0
2428.33	9.44559	2.04952e-08	5.39758e-24	0	0	0	0	0	0	1.24612e-08
2435.22	9.3097	0	8.70868e-24	0	0	6.28474e-09	0	0	1.52397e-08	1.62947e-08
2442.07	8.81877	2.31901e-08	0	0	0	0	0	1.27014e-08	9.62549e-09	0
2448.81	9.38408	0	0	0	0	0	0	3.14528e-08	2.62293e-09	0
2456.2	9.35962	0	2.91897e-08	9.7485e-25	0	0	1.08871e-23	3.27958e-08	3.93836e-08	5.75055e-08
2462.72	8.86375	1.06383e-08	2.90252e-08	0	0	0	2.46443e-08	0	2.30778e-08	0
2469.32	9.10723	9.78471e-08	1.77846e-07	8.17853e-09	5.60014e-08	9.39635e-08	5.45493e-08	5.86308e-08	7.90166e-08	7.55453e-09
2476.64	9.57509	5.52344e-08	8.30088e-08	4.83336e-09	1.01498e-07	3.17837e-09	1.82641e-07	2.81092e-08	1.1126e-07	0
2483.46	8.89409	4.16087e-06	3.97776e-06	3.81788e-06	3.12909e-06	2.90642e-06	2.75878e-06	3.46433e-06	3.37743e-06	3.13883e-06
2489.9	8.98538	4.1323e-06	4.36527e-06	4.8596e-06	3.40673e-06	3.55634e-06	3.80825e-06	3.69496e-06	3.89902e-06	4.2271e-06
2496.76	9.439	1.90955e-06	1.93819e-06	2.07241e-06	1.7362e-06	1.82223e-06	1.88506e-06	1.6667e-06	1.74532e-06	1.79405e-06
