# Supplementary material for: Towards global carbon transparency: Spaceborne imaging spectroscopy enables precise CO2 emission quantification at facility scale
Source: Research Square preprint supplement (doi:10.21203/rs.3.rs-5913782/v1), 2025-01-29
Supplement: Supplementary file 26 [file CO2_k_v9.xlsx]

## Sheet: k_ZY1E
Wavelength	FWHM	k_Summer_L	k_Summer_M	k_Summer_H	k_Winter_L	k_Winter_M	k_Winter_H	k_1976_L	k_1976_M	k_1976_H
1005.6	16.26	0	0	0	0	0	0	0	0	0	0	0	0	0	0	0	0	0
1022.21	16.26	0	0	0	0	0	0	0	0	0	0	0	0	0	0	0	0	0
1039.19	16.26	4.52288e-07	3.39864e-07	3.41384e-07	3.47333e-07	3.38649e-07	3.32056e-07	3.29841e-07	3.19994e-07	3.17386e-07	3.09309e-07	3.11967e-07	2.99594e-07	2.79652e-07	2.7609e-07	2.47489e-07	2.21489e-07	2.29474e-07
1055.87	16.26	7.31466e-07	5.46948e-07	5.40524e-07	5.47403e-07	5.39415e-07	5.41621e-07	5.23282e-07	5.34157e-07	5.3874e-07	5.23984e-07	5.10851e-07	4.88588e-07	4.70448e-07	4.32903e-07	3.90442e-07	3.59929e-07	3.2353e-07
1072.55	16.26	7.186e-08	5.88746e-08	6.5059e-08	6.95273e-08	5.20125e-08	6.18255e-08	5.03012e-08	6.87895e-08	5.55317e-08	6.46037e-08	6.51734e-08	6.14061e-08	3.50358e-08	3.21498e-08	4.2081e-08	4.16222e-08	4.39345e-08
1089.23	16.26	6.41605e-10	1.99771e-09	0	0	0	0	1.44773e-09	4.62906e-09	0	3.61259e-10	-2.77574e-10	0	0	0	0	-2.03544e-09	0
1105.91	16.26	0	0	0	0	0	-2.76252e-10	4.78244e-10	6.59224e-10	0	0	0	0	0	0	0	0	0
1122.59	16.26	0	0	0	6.25074e-10	0	0	0	0	3.20457e-10	-7.52076e-10	0	0	0	0	2.33686e-09	0	2.48787e-09
1139.44	16.26	0	0	0	6.01358e-26	0	0	0	1.55246e-09	0	0	0	0	9.39655e-25	0	0	0	2.34097e-10
1156.41	16.26	0	1.61916e-09	0	0	-9.10504e-10	0	0	0	0	0	0	0	0	0	0	0	0
1173.29	16.26	0	0	0	0	0	0	0	0	0	0	0	3.92475e-09	0	0	0	0	0
1190.17	16.26	0	0	0	0	0	0	0	0	0	0	0	0	0	0	0	0	0
1207.04	16.26	3.01299e-05	2.3872e-05	2.37343e-05	2.36033e-05	2.348e-05	2.33417e-05	2.31886e-05	2.29183e-05	2.2615e-05	2.23543e-05	2.1773e-05	2.12164e-05	2.0645e-05	1.97843e-05	1.8173e-05	1.65672e-05	1.50567e-05
1223.92	16.26	1.84465e-05	1.44632e-05	1.43668e-05	1.42716e-05	1.41699e-05	1.41103e-05	1.40155e-05	1.38172e-05	1.36376e-05	1.34909e-05	1.30963e-05	1.27397e-05	1.2366e-05	1.18258e-05	1.08331e-05	9.83929e-06	8.8861e-06
1240.8	16.26	4.99315e-07	3.7071e-07	3.45679e-07	3.68529e-07	3.78167e-07	3.63276e-07	3.87068e-07	3.63877e-07	3.53277e-07	3.4949e-07	3.32308e-07	3.29999e-07	3.13963e-07	3.08015e-07	2.62495e-07	2.07163e-07	1.96567e-07
1257.4	16.26	2.12859e-07	1.56123e-07	1.7587e-07	1.5028e-07	1.4565e-07	1.45034e-07	1.52514e-07	1.8149e-07	1.45206e-07	1.591e-07	1.45924e-07	1.62871e-07	1.12497e-07	1.87302e-07	1.393e-07	1.50096e-07	6.81303e-08
1274.15	16.26	4.32522e-09	-1.5067e-09	1.17085e-08	1.3659e-08	1.26258e-09	9.63039e-09	1.20601e-08	6.70477e-10	7.7973e-09	7.19515e-09	1.18503e-09	1.41686e-09	-2.45482e-09	1.9625e-09	0	1.86035e-09	5.05754e-09
1290.9	16.26	1.78539e-06	1.41293e-06	1.41866e-06	1.36485e-06	1.3672e-06	1.3823e-06	1.36722e-06	1.35707e-06	1.34065e-06	1.33305e-06	1.28137e-06	1.25883e-06	1.2154e-06	1.15574e-06	1.05402e-06	9.60521e-07	8.52243e-07
1307.65	16.26	8.81056e-07	6.98236e-07	6.79719e-07	6.7999e-07	6.98286e-07	6.92887e-07	6.66067e-07	6.59777e-07	6.58215e-07	6.53516e-07	6.33801e-07	6.23249e-07	5.99505e-07	5.68819e-07	5.26765e-07	4.69673e-07	4.25467e-07
1324.4	16.26	2.38672e-06	1.78168e-06	1.78771e-06	1.76333e-06	1.75722e-06	1.75884e-06	1.73309e-06	1.71395e-06	1.67565e-06	1.64087e-06	1.60207e-06	1.57774e-06	1.5237e-06	1.42467e-06	1.27342e-06	1.13527e-06	1.04731e-06
1341.16	16.26	3.07983e-06	2.29001e-06	2.29712e-06	2.27609e-06	2.25381e-06	2.24921e-06	2.2064e-06	2.21737e-06	2.15763e-06	2.10934e-06	2.08629e-06	2.00429e-06	1.93157e-06	1.88358e-06	1.74827e-06	1.56472e-06	1.3849e-06
1357.91	16.26	1.5618e-07	3.00074e-08	2.1052e-08	3.95575e-08	2.94959e-08	2.2258e-08	6.74529e-08	2.23221e-08	2.16985e-08	2.13505e-08	3.77227e-08	5.72172e-08	2.58961e-08	1.58978e-08	3.01842e-08	1.44088e-08	8.77393e-09
1374.87	16.26	2.10698e-07	1.80574e-07	1.161e-07	1.0876e-07	9.53066e-08	1.60038e-07	1.01689e-07	2.11534e-07	1.19394e-07	1.20392e-07	1.41175e-07	8.83913e-08	8.06996e-08	1.08412e-07	1.29615e-07	1.11872e-07	1.17606e-07
1391.65	16.26	7.54154e-10	0	2.4345e-09	1.54801e-09	2.14261e-09	3.38209e-09	4.90012e-09	3.20352e-09	4.53733e-10	2.51383e-09	4.78914e-09	4.55778e-09	6.38365e-10	0	4.91871e-09	1.96842e-09	1.07196e-08
1408.49	16.26	1.33945e-10	0	7.35154e-09	1.86268e-08	0	0	-1.68068e-09	0	0	0	0	0	-1.28777e-08	0	0	0	0
1425.33	16.26	2.92309e-05	2.4965e-05	2.49446e-05	2.48884e-05	2.48391e-05	2.47833e-05	2.47581e-05	2.46109e-05	2.45077e-05	2.43886e-05	2.4144e-05	2.38946e-05	2.35704e-05	2.30766e-05	2.19892e-05	2.07493e-05	1.94583e-05
1442.17	16.26	0.000161137	0.000115553	0.000114964	0.000114327	0.000113734	0.000113004	0.000112436	0.000111115	0.000109876	0.000108469	0.000105692	0.000102848	9.9997e-05	9.5463e-05	8.7151e-05	7.84986e-05	7.06171e-05
1459.01	16.26	1.12577e-06	7.04573e-07	7.54085e-07	7.08217e-07	6.80667e-07	7.00928e-07	7.09621e-07	6.48157e-07	6.63857e-07	6.38963e-07	6.43351e-07	6.19233e-07	5.54969e-07	4.55572e-07	5.31192e-07	3.80562e-07	3.17194e-07
1475.85	16.26	1.01685e-05	8.14007e-06	8.12997e-06	8.08947e-06	8.05819e-06	8.00468e-06	8.00557e-06	7.87936e-06	7.83771e-06	7.72876e-06	7.59314e-06	7.42401e-06	7.26843e-06	6.93517e-06	6.46743e-06	5.9545e-06	5.42651e-06
1492.7	16.26	2.44926e-06	1.84598e-06	1.81625e-06	1.83575e-06	1.78683e-06	1.78284e-06	1.79274e-06	1.76759e-06	1.77286e-06	1.68422e-06	1.61151e-06	1.59692e-06	1.47416e-06	1.47691e-06	1.34781e-06	1.18698e-06	1.0689e-06
1509.54	16.26	4.3326e-08	2.95542e-08	3.2909e-08	3.67924e-08	4.24174e-08	3.24244e-08	3.50647e-08	2.15043e-08	4.18077e-08	2.21703e-08	2.10896e-08	2.34284e-08	1.72739e-08	1.80264e-08	1.61771e-08	2.0018e-08	1.0988e-08
1526.38	16.26	7.25563e-06	5.52461e-06	5.4741e-06	5.4585e-06	5.40571e-06	5.37532e-06	5.33414e-06	5.23733e-06	5.16519e-06	5.04665e-06	4.91471e-06	4.74406e-06	4.59896e-06	4.33248e-06	3.86867e-06	3.4736e-06	3.06214e-06
1543.22	16.26	2.09058e-05	1.68159e-05	1.66923e-05	1.664e-05	1.65123e-05	1.64218e-05	1.63358e-05	1.61101e-05	1.5919e-05	1.57479e-05	1.53064e-05	1.49219e-05	1.45133e-05	1.37938e-05	1.26598e-05	1.14308e-05	1.02835e-05
1560.06	16.26	1.00083e-06	7.0988e-07	7.06972e-07	7.31373e-07	7.06221e-07	7.09342e-07	6.78011e-07	6.53735e-07	6.99966e-07	6.31929e-07	6.59383e-07	6.61735e-07	5.30277e-07	5.68254e-07	4.69815e-07	4.17088e-07	3.4233e-07
1576.9	16.26	0.000178835	0.0001428	0.000141938	0.000141099	0.000140254	0.000139431	0.000138554	0.000136842	0.000135089	0.000133312	0.000129792	0.000126171	0.000122668	0.000117022	0.000106781	9.59532e-05	8.59377e-05
1593.71	16.26	1.99498e-05	1.55023e-05	1.54421e-05	1.53533e-05	1.52093e-05	1.5093e-05	1.49856e-05	1.48027e-05	1.45827e-05	1.44017e-05	1.39792e-05	1.35049e-05	1.31188e-05	1.24451e-05	1.12021e-05	9.93408e-06	8.81319e-06
1610.39	16.26	0.000141556	0.000113131	0.000112474	0.000111815	0.000111127	0.000110421	0.000109735	0.000108352	0.000106942	0.000105522	0.000102713	9.98958e-05	9.69822e-05	9.2573e-05	8.42157e-05	7.54526e-05	6.73659e-05
1627.13	16.26	4.34103e-06	3.3074e-06	3.28886e-06	3.2435e-06	3.25621e-06	3.21137e-06	3.18929e-06	3.15476e-06	3.07203e-06	3.06078e-06	2.93986e-06	2.80982e-06	2.69204e-06	2.64333e-06	2.29618e-06	1.99796e-06	1.72866e-06
1644.01	16.26	3.17272e-05	2.58268e-05	2.56719e-05	2.55328e-05	2.53994e-05	2.52394e-05	2.51163e-05	2.4782e-05	2.44675e-05	2.4257e-05	2.36653e-05	2.29982e-05	2.23057e-05	2.14559e-05	1.95426e-05	1.75476e-05	1.57146e-05
1660.89	16.26	3.49323e-06	2.59961e-06	2.65137e-06	2.60457e-06	2.57615e-06	2.55326e-06	2.56086e-06	2.49636e-06	2.4311e-06	2.43765e-06	2.33541e-06	2.2347e-06	2.1789e-06	2.04384e-06	1.80078e-06	1.58039e-06	1.36674e-06
1677.77	16.26	3.81483e-07	2.97335e-07	2.90402e-07	2.46848e-07	2.71494e-07	3.67072e-07	2.249e-07	3.07472e-07	2.74474e-07	3.35386e-07	2.53737e-07	2.9899e-07	2.32544e-07	2.09983e-07	2.00034e-07	1.88035e-07	1.56058e-07
1694.65	16.26	2.3189e-08	5.79131e-09	2.12288e-08	2.13342e-08	3.67199e-08	1.11506e-08	0	3.17027e-08	2.72739e-08	0	7.66058e-09	2.37967e-08	9.19995e-09	1.05177e-08	6.38518e-09	5.47037e-09	1.3791e-10
1711.53	16.26	2.6307e-08	1.39732e-08	0	0	9.33487e-09	3.2955e-08	3.92081e-08	9.65595e-09	5.78052e-08	8.6462e-09	1.09573e-08	6.98057e-24	1.13878e-08	8.15796e-09	1.17871e-08	-1.30159e-10	-1.34639e-08
1728.41	16.26	0	7.83286e-09	-8.19923e-25	9.63838e-09	0	1.65857e-08	8.82707e-09	1.76487e-09	0	0	0	0	1.3476e-09	6.16721e-09	-9.99119e-10	3.47667e-09	0
1745.28	16.26	1.37148e-09	0	0	0	0	1.02782e-08	1.05487e-08	0	0	0	0	0	-1.19446e-09	1.29351e-09	2.6695e-09	0	0
1762.16	16.26	1.90914e-07	1.58335e-07	7.45871e-08	6.22444e-08	1.17719e-07	1.14396e-07	1.08926e-07	8.88683e-08	1.33376e-07	1.21644e-07	3.94762e-08	8.2625e-08	7.06672e-08	8.03549e-08	6.47567e-08	4.70185e-08	4.77754e-08
1778.85	16.26	1.73362e-08	1.49495e-08	1.34037e-08	5.35686e-08	1.00475e-08	3.01374e-08	7.06479e-10	7.11986e-09	1.01401e-09	9.26735e-09	1.00798e-08	6.58673e-09	1.38737e-08	1.02319e-08	6.33702e-09	7.80791e-09	2.54752e-08
1795.43	16.26	1.16153e-07	4.90935e-08	1.2581e-07	1.05401e-07	8.53054e-08	1.02765e-07	5.409e-08	7.96704e-08	1.12139e-07	6.19262e-08	6.95888e-08	6.93516e-08	5.09871e-08	5.17616e-08	3.46526e-08	4.86117e-08	2.155e-08
1812.02	16.26	6.12694e-08	1.02141e-08	6.44761e-10	2.38804e-09	1.25057e-08	2.14432e-08	0	6.07362e-09	9.84753e-10	1.08026e-08	5.34484e-09	9.96028e-09	1.57899e-08	1.64164e-08	5.53266e-09	1.32641e-08	4.26897e-09
1828.82	16.26	0	0	0	1.05314e-08	0	0	0	0	0	0	0	1.02889e-08	0	0	0	0	0
1845.62	16.26	0	0	0	0	0	0	0	0	0	0	0	0	0	0	0	0	0
1862.42	16.26	2.71667e-09	7.30761e-09	2.47381e-08	4.17232e-08	2.47705e-08	2.79336e-08	7.08991e-09	2.49519e-08	3.07207e-08	7.48698e-08	1.39383e-08	4.08514e-08	1.68189e-08	4.8438e-08	5.15538e-08	9.6593e-09	1.4451e-08
1880.13	16.26	5.18554e-05	3.22957e-05	3.22485e-05	3.21164e-05	3.20969e-05	3.20425e-05	3.19212e-05	3.17571e-05	3.15776e-05	3.14425e-05	3.10191e-05	3.05566e-05	2.9967e-05	2.90498e-05	2.70429e-05	2.44736e-05	2.23677e-05
1896.11	16.26	4.64134e-06	2.46636e-06	2.50102e-06	2.52311e-06	2.47632e-06	2.45408e-06	2.48304e-06	2.43642e-06	2.4212e-06	2.4615e-06	2.39177e-06	2.29308e-06	2.27934e-06	2.11767e-06	2.00329e-06	1.73131e-06	1.44341e-06
1912.97	16.26	6.4474e-07	2.91412e-07	3.42482e-07	3.50411e-07	4.33911e-07	3.6543e-07	3.22966e-07	3.37589e-07	3.40513e-07	3.46713e-07	3.28766e-07	2.61891e-07	3.30642e-07	3.10206e-07	3.45356e-07	1.97532e-07	2.44852e-07
1929.93	16.26	2.11987e-06	9.29162e-07	9.17864e-07	8.70577e-07	9.21618e-07	8.9935e-07	8.46307e-07	8.52859e-07	8.30321e-07	8.14536e-07	7.02322e-07	7.51605e-07	7.49704e-07	6.24085e-07	5.73365e-07	4.65215e-07	2.9839e-07
1946.82	16.26	0.000573972	0.000385275	0.000382661	0.000380029	0.000377369	0.000374722	0.000372032	0.000366635	0.000361137	0.000355534	0.000344141	0.000332407	0.000320439	0.000301386	0.000264809	0.00022446	0.000191227
1963.72	16.26	0.0010613	0.000798599	0.000793793	0.000788936	0.000784035	0.000779116	0.000774172	0.000764176	0.000754041	0.000743791	0.000722731	0.000700975	0.000678895	0.00064313	0.000572643	0.000492151	0.000423202
1980.61	16.26	0.000114453	8.96814e-05	8.90604e-05	8.8472e-05	8.79104e-05	8.73327e-05	8.66356e-05	8.5499e-05	8.42486e-05	8.30248e-05	8.05072e-05	7.79648e-05	7.54124e-05	7.13737e-05	6.33486e-05	5.42626e-05	4.60725e-05
1997.51	16.26	0.000613236	0.000537872	0.000536201	0.000534373	0.000532559	0.000530825	0.000529017	0.000525245	0.000521396	0.000517377	0.000508981	0.000499887	0.000490245	0.000473721	0.000438083	0.000391895	0.000348983
2014.4	16.26	0.00253645	0.00182249	0.00180977	0.00179696	0.00178404	0.00177119	0.00175814	0.00173196	0.00170544	0.0016786	0.00162374	0.0015672	0.0015095	0.00141658	0.00123609	0.00103367	0.000870124
2031.3	16.26	0.000368913	0.000286722	0.00028476	0.000282649	0.000280647	0.000278515	0.000276456	0.00027231	0.000268159	0.000263964	0.000255554	0.000246969	0.000238538	0.000225029	0.000198517	0.000168427	0.000141252
2048.13	16.26	0.000577019	0.000466393	0.000463691	0.000460921	0.00045821	0.000455482	0.000452711	0.00044717	0.000441545	0.000435893	0.000424365	0.000412466	0.000400621	0.000381387	0.000342458	0.000296366	0.00025426
2064.9	16.26	0.00079984	0.000633148	0.000629136	0.000625161	0.00062115	0.000617163	0.000613128	0.000605022	0.000596912	0.000588665	0.000571967	0.000554826	0.000537742	0.000510147	0.000454754	0.00038972	0.00033144
2081.61	16.26	0.000341696	0.000269223	0.00026743	0.000265576	0.000263679	0.000261818	0.000259946	0.000256224	0.00025245	0.000248668	0.000241057	0.000233265	0.000225632	0.000213342	0.000189004	0.000160841	0.000134931
2098.45	16.26	8.02123e-05	6.28713e-05	6.23657e-05	6.19695e-05	6.14349e-05	6.09694e-05	6.05284e-05	5.96046e-05	5.86973e-05	5.77788e-05	5.59271e-05	5.40845e-05	5.22699e-05	4.93378e-05	4.36495e-05	3.71241e-05	3.10226e-05
2115.29	16.26	2.14273e-05	1.74601e-05	1.73233e-05	1.72248e-05	1.71809e-05	1.7071e-05	1.69592e-05	1.67456e-05	1.65356e-05	1.63097e-05	1.58805e-05	1.5415e-05	1.49562e-05	1.42699e-05	1.27962e-05	1.11134e-05	9.54946e-06
2132.13	16.26	2.10317e-06	1.65803e-06	1.69909e-06	1.57133e-06	1.62357e-06	1.60638e-06	1.60993e-06	1.57914e-06	1.5615e-06	1.53499e-06	1.48003e-06	1.46321e-06	1.39859e-06	1.31035e-06	1.14072e-06	9.62025e-07	9.26562e-07
2148.97	16.26	1.47943e-05	1.24292e-05	1.22763e-05	1.22294e-05	1.21693e-05	1.20982e-05	1.20337e-05	1.18965e-05	1.17626e-05	1.16339e-05	1.13838e-05	1.11051e-05	1.08345e-05	1.04046e-05	9.44164e-06	8.2793e-06	7.1557e-06
2165.81	16.26	1.08163e-05	8.94301e-06	8.91469e-06	8.84467e-06	8.80616e-06	8.74857e-06	8.69945e-06	8.58882e-06	8.49915e-06	8.38186e-06	8.19105e-06	7.97111e-06	7.75149e-06	7.39158e-06	6.72232e-06	5.79315e-06	5.00837e-06
2182.64	16.26	9.36443e-07	7.37786e-07	7.39306e-07	7.26464e-07	7.29076e-07	7.10639e-07	7.13155e-07	6.99569e-07	6.93222e-07	6.70982e-07	6.48528e-07	6.46003e-07	6.48949e-07	5.82561e-07	5.3995e-07	4.12302e-07	3.75596e-07
2199.48	16.26	2.23392e-07	1.97667e-07	1.75381e-07	1.56923e-07	1.49616e-07	1.85628e-07	1.73504e-07	1.76073e-07	1.56403e-07	1.41465e-07	1.40883e-07	1.65687e-07	1.39185e-07	1.23216e-07	1.76373e-07	1.53826e-07	7.54041e-08
2216.32	16.26	2.77971e-07	1.89126e-07	1.93925e-07	1.96586e-07	2.00777e-07	2.00193e-07	1.97211e-07	1.84209e-07	1.7362e-07	1.67527e-07	1.68664e-07	2.19039e-07	1.84577e-07	1.45327e-07	9.9641e-08	6.14471e-08	1.10922e-07
2233.16	16.26	7.74773e-08	8.03948e-08	7.78744e-08	6.13144e-08	8.65644e-08	6.12742e-08	8.2464e-08	7.41616e-08	4.24639e-08	7.01271e-08	4.18812e-08	7.9808e-08	2.90429e-08	7.90142e-08	6.47453e-08	3.43838e-08	4.74592e-08
2250	16.26	1.60863e-07	1.2342e-07	1.43498e-07	1.12829e-07	1.33335e-07	1.40889e-07	1.16028e-07	1.30682e-07	1.21022e-07	1.20537e-07	1.3924e-07	9.31666e-08	8.90515e-08	7.80055e-08	1.1289e-07	1.01878e-07	5.22893e-08
2266.84	16.26	2.05228e-08	5.70989e-08	4.93092e-08	4.35027e-08	3.53313e-08	4.61548e-08	4.80322e-08	5.21003e-08	5.64419e-08	5.51622e-08	1.20356e-08	3.21828e-08	8.40874e-08	3.19358e-08	2.37816e-08	5.054e-08	5.33409e-08
2283.67	16.26	3.15001e-08	2.6796e-08	1.24583e-08	4.6711e-08	2.08862e-08	1.34542e-08	5.72192e-08	2.95019e-08	1.36106e-08	1.63865e-08	4.14019e-08	3.44375e-08	2.12847e-08	2.25137e-08	0	-2.99339e-08	2.74966e-08
2300.51	16.26	0	1.47887e-09	3.43853e-24	4.97368e-09	2.09588e-09	5.45381e-09	2.02978e-08	1.03944e-08	7.85155e-09	0	1.13121e-08	0	2.80945e-08	0	0	0	6.46169e-09
2317.35	16.26	0	0	0	3.66084e-09	0	3.49067e-09	0	1.84125e-09	0	1.13926e-08	-1.46375e-09	0	1.78366e-09	0	0	0	3.19884e-09
2334.19	16.26	0	0	3.57406e-09	2.88604e-09	0	0	0	0	0	3.62063e-09	-9.0471e-09	0	0	0	0	-8.01473e-09	0
2350.4	16.26	0	-4.43053e-10	3.38819e-09	0	0	0	0	0	0	0	0	2.75998e-09	0	0	0	4.68928e-09	0
2366.68	16.26	0	0	1.37169e-09	1.3142e-08	-9.84329e-09	1.73592e-08	1.15018e-08	0	1.09074e-08	0	7.7846e-09	2.14852e-08	0	0	0	4.65109e-09	0
2384.12	16.26	0	0	0	-2.71017e-25	0	2.99267e-09	0	0	8.77385e-09	-2.0588e-08	0	0	0	0	0	1.70871e-08	1.43909e-08
2400.81	16.26	0	0	-1.84491e-09	5.63961e-09	1.45396e-09	0	0	0	1.30701e-08	-3.17478e-09	-3.60298e-09	0	9.37443e-09	0	1.03599e-08	-2.01988e-09	0
2417.5	16.26	0	7.49152e-09	-2.07754e-09	0	-1.31613e-09	0	1.50122e-08	0	0	0	0	0	0	0	0	-5.45361e-09	0
2434.19	16.26	8.01512e-09	2.39894e-09	4.25985e-09	3.91792e-09	1.49238e-24	0	4.74809e-09	2.99898e-10	9.49836e-09	1.55025e-08	1.11569e-08	4.90142e-10	0	4.8409e-09	5.85639e-09	-3.78168e-09	0
2450.88	16.26	1.36932e-08	-2.381e-25	0	0	0	0	0	2.74105e-09	0	2.53626e-08	0	0	5.0301e-08	5.12699e-09	0	-5.4275e-09	6.12272e-09
2467.57	16.26	6.31956e-08	5.83137e-08	6.6053e-09	8.71285e-09	2.59e-08	2.87992e-08	2.7945e-08	6.22621e-08	2.83882e-08	1.51139e-08	5.64767e-08	1.74263e-08	7.33759e-09	1.58022e-08	0	1.89306e-08	1.43127e-08
2484.32	16.26	3.3115e-06	2.4519e-06	2.39345e-06	2.42499e-06	2.34718e-06	2.36597e-06	2.36347e-06	2.2614e-06	2.29841e-06	2.23211e-06	2.11466e-06	2.04778e-06	2.02473e-06	1.97735e-06	1.6621e-06	1.39229e-06	1.09694e-06
2501.08	16.26	1.68857e-06	1.322e-06	1.3329e-06	1.2699e-06	1.26744e-06	1.29857e-06	1.22972e-06	1.25417e-06	1.23035e-06	1.25038e-06	1.17282e-06	1.16522e-06	1.11621e-06	9.98905e-07	9.79234e-07	7.6931e-07	6.11881e-07

## Sheet: k_ZY1F
Wavelength	FWHM	k_Summer_L	k_Summer_M	k_Summer_H	k_Winter_L	k_Winter_M	k_Winter_H	k_1976_L	k_1976_M	k_1976_H
1009.7	16.848	0	0	0	0	0	0	0	0	0	0	0	0	0	0	0	0	0
1026.55	16.846	0	0	0	0	0	0	0	0	0	0	0	0	0	0	0	0	0
1043.4	16.846	4.94881e-07	3.75749e-07	3.76134e-07	3.77154e-07	3.75465e-07	3.65898e-07	3.6279e-07	3.56952e-07	3.53195e-07	3.42353e-07	3.44461e-07	3.37059e-07	3.14848e-07	3.01549e-07	2.85446e-07	2.40921e-07	2.39706e-07
1060.24	16.849	2.85961e-07	2.06593e-07	2.02896e-07	2.00715e-07	2.054e-07	2.07231e-07	1.97747e-07	1.99344e-07	2.06855e-07	1.93965e-07	1.95393e-07	1.83559e-07	1.83562e-07	1.52043e-07	1.48375e-07	1.35868e-07	1.18044e-07
1077.09	16.845	2.35733e-08	1.60946e-08	2.2098e-08	2.86505e-08	1.87355e-08	2.11567e-08	1.51248e-08	2.70985e-08	1.6203e-08	2.22468e-08	3.04318e-08	3.08175e-08	5.34642e-09	7.33995e-09	1.12936e-08	1.01073e-08	1.25561e-08
1093.94	16.845	0	1.67233e-09	0	0	0	-4.91412e-10	3.05858e-09	6.75704e-09	0	2.70617e-09	0	0	0	0	0	0	0
1110.78	16.848	0	0	0	0	-1.94006e-25	0	2.04405e-09	0	1.09039e-10	-8.08141e-10	0	0	0	0	1.79583e-09	0	1.70029e-09
1127.63	16.848	0	0	0	2.07174e-09	0	0	0	2.37324e-09	0	0	4.92271e-09	0	1.1619e-24	0	0	0	2.27764e-10
1144.48	16.845	0	8.54572e-10	0	0	0	0	0	0	0	0	0	0	0	0	0	0	0
1161.32	16.849	0	0	0	0	-3.74045e-09	0	0	0	0	0	0	8.29401e-10	0	0	0	0	0
1178.17	16.845	0	0	0	0	0	0	0	0	0	0	0	0	0	0	0	0	0
1195.02	16.848	1.05858e-07	8.01259e-08	7.90835e-08	7.88478e-08	8.0193e-08	7.6707e-08	7.58219e-08	7.44009e-08	7.3631e-08	7.28254e-08	7.0066e-08	6.74283e-08	6.75869e-08	6.17516e-08	6.06098e-08	4.82419e-08	4.58274e-08
1211.86	16.845	1.86089e-05	1.46231e-05	1.45301e-05	1.44422e-05	1.43627e-05	1.4287e-05	1.41832e-05	1.4021e-05	1.38062e-05	1.36523e-05	1.3278e-05	1.29378e-05	1.25419e-05	1.20312e-05	1.09877e-05	9.99425e-06	9.01329e-06
1228.71	16.848	6.97426e-06	5.36383e-06	5.32698e-06	5.28273e-06	5.24351e-06	5.22664e-06	5.18062e-06	5.10017e-06	5.02508e-06	4.97697e-06	4.80187e-06	4.65436e-06	4.50233e-06	4.30315e-06	3.90747e-06	3.54306e-06	3.17065e-06
1245.56	16.848	1.7711e-07	1.20725e-07	1.10494e-07	1.23136e-07	1.33281e-07	1.2814e-07	1.45558e-07	1.3112e-07	1.2786e-07	1.12237e-07	1.09565e-07	1.23729e-07	1.1308e-07	1.24139e-07	9.76496e-08	9.66769e-08	9.20282e-08
1262.4	16.846	2.32132e-07	1.6274e-07	1.82277e-07	1.71194e-07	1.53817e-07	1.58037e-07	1.62944e-07	1.74837e-07	1.6117e-07	1.78377e-07	1.53417e-07	1.78261e-07	1.36593e-07	1.80478e-07	6.90332e-08	1.1544e-07	9.77258e-08
1279.25	16.845	1.27148e-08	4.33911e-09	1.47997e-08	9.84059e-09	7.31509e-09	9.85859e-09	1.51744e-08	3.67989e-09	1.16941e-08	1.11932e-08	9.94281e-09	1.31914e-08	-2.1234e-09	7.33699e-09	2.54115e-24	1.94482e-09	1.30408e-09
1296.09	16.849	1.47277e-06	1.16765e-06	1.17342e-06	1.11901e-06	1.14352e-06	1.15173e-06	1.1452e-06	1.12036e-06	1.11087e-06	1.08755e-06	1.07559e-06	1.04421e-06	1.01665e-06	9.72475e-07	8.85499e-07	7.85288e-07	7.17695e-07
1312.94	16.845	4.72621e-06	3.73099e-06	3.69542e-06	3.6726e-06	3.66248e-06	3.63758e-06	3.59995e-06	3.56494e-06	3.51643e-06	3.47242e-06	3.3951e-06	3.32082e-06	3.20806e-06	3.05572e-06	2.82397e-06	2.52667e-06	2.30999e-06
1329.79	16.846	4.5234e-07	3.1624e-07	3.3803e-07	3.08905e-07	3.2039e-07	3.09599e-07	3.01097e-07	3.09532e-07	3.07793e-07	2.80277e-07	2.717e-07	2.79836e-07	2.58862e-07	2.72669e-07	2.4346e-07	1.96118e-07	1.78211e-07
1346.63	16.848	2.34017e-06	1.42515e-06	1.41002e-06	1.42284e-06	1.37061e-06	1.36698e-06	1.38741e-06	1.37056e-06	1.32648e-06	1.23593e-06	1.21816e-06	1.20135e-06	1.12085e-06	1.04932e-06	9.69229e-07	8.2925e-07	7.21071e-07
1363.48	16.848	4.83263e-08	3.32212e-08	3.86873e-08	2.69161e-08	3.77924e-08	3.43715e-08	2.98899e-08	3.60004e-08	2.44604e-08	3.54647e-08	2.81737e-08	4.79841e-08	4.59328e-08	2.79034e-08	3.98286e-08	3.94552e-08	2.80571e-08
1380.33	16.845	1.37047e-07	1.17355e-07	6.13112e-08	5.59808e-08	5.45179e-08	7.87924e-08	4.58104e-08	1.27701e-07	5.67304e-08	5.52773e-08	7.96275e-08	3.14222e-08	2.83007e-08	5.7874e-08	6.71747e-08	4.95493e-08	5.43054e-08
1397.17	16.848	0	0	9.39585e-09	1.18655e-09	0	1.37093e-09	3.72179e-10	6.6755e-09	2.03066e-09	4.14659e-10	1.19311e-09	5.38145e-10	3.01844e-09	0	4.10275e-09	0	6.75362e-09
1414.02	16.848	4.8835e-11	0	1.27214e-09	2.74692e-08	0	0	4.25296e-09	0	7.99768e-10	0	5.6756e-10	0	-2.24258e-08	0	5.816e-10	0	0
1430.87	16.845	0.000155638	0.000130184	0.000129911	0.000129546	0.000129235	0.000128891	0.000128583	0.000127841	0.000127131	0.000126336	0.000124657	0.000122896	0.000120986	0.000117766	0.000111266	0.00010383	9.6494e-05
1447.71	16.846	5.36214e-05	3.80979e-05	3.78768e-05	3.76318e-05	3.74391e-05	3.71758e-05	3.69296e-05	3.64288e-05	3.59995e-05	3.54356e-05	3.44234e-05	3.33549e-05	3.23351e-05	3.07364e-05	2.77313e-05	2.46767e-05	2.19656e-05
1464.56	16.846	9.92252e-07	7.60281e-07	7.98778e-07	8.10654e-07	7.89022e-07	7.58359e-07	7.90779e-07	7.60209e-07	7.46256e-07	7.34948e-07	7.42181e-07	7.47715e-07	7.06502e-07	6.53464e-07	6.41466e-07	5.74644e-07	5.17883e-07
1481.41	16.846	5.6886e-06	4.44695e-06	4.47226e-06	4.39881e-06	4.34839e-06	4.37247e-06	4.37159e-06	4.2758e-06	4.23051e-06	4.19897e-06	4.144e-06	4.0206e-06	3.87982e-06	3.71511e-06	3.4565e-06	3.15803e-06	2.86296e-06
1498.25	16.849	2.58273e-06	2.05389e-06	2.00794e-06	2.0327e-06	1.98032e-06	1.97847e-06	2.00893e-06	1.96581e-06	1.93961e-06	1.86095e-06	1.83758e-06	1.84084e-06	1.70295e-06	1.68676e-06	1.54924e-06	1.36861e-06	1.24121e-06
1515.1	16.844	5.12732e-08	5.14957e-08	1.68707e-08	3.73049e-08	4.76903e-08	3.35467e-08	5.10036e-08	3.65938e-08	1.16934e-08	3.10527e-08	5.30729e-08	5.02284e-09	3.07977e-08	3.489e-08	1.71549e-09	1.641e-08	1.31108e-08
1531.94	16.848	2.44897e-05	1.93097e-05	1.91809e-05	1.91091e-05	1.89657e-05	1.88576e-05	1.87235e-05	1.84695e-05	1.82256e-05	1.80042e-05	1.74853e-05	1.70271e-05	1.64954e-05	1.56794e-05	1.43006e-05	1.28692e-05	1.15365e-05
1548.79	16.848	5.22131e-06	4.15315e-06	4.08003e-06	4.07745e-06	4.0068e-06	4.01907e-06	4.00603e-06	3.88745e-06	3.86313e-06	3.83426e-06	3.74678e-06	3.67729e-06	3.54753e-06	3.32219e-06	3.00383e-06	2.69387e-06	2.40725e-06
1565.64	16.846	5.06025e-05	3.96318e-05	3.93943e-05	3.91445e-05	3.88737e-05	3.86317e-05	3.83511e-05	3.78513e-05	3.73537e-05	3.67432e-05	3.58031e-05	3.4736e-05	3.36183e-05	3.21097e-05	2.89981e-05	2.58838e-05	2.30318e-05
1582.49	16.845	9.25286e-05	7.37611e-05	7.33179e-05	7.28604e-05	7.24011e-05	7.19812e-05	7.15277e-05	7.0626e-05	6.97218e-05	6.87341e-05	6.68828e-05	6.49757e-05	6.31924e-05	6.01069e-05	5.48054e-05	4.91489e-05	4.39179e-05
1599.33	16.848	0.000109794	8.76206e-05	8.71436e-05	8.66328e-05	8.60829e-05	8.55643e-05	8.50134e-05	8.39723e-05	8.29261e-05	8.18443e-05	7.96816e-05	7.74445e-05	7.52747e-05	7.1771e-05	6.53723e-05	5.85921e-05	5.23785e-05
1616.18	16.846	5.79097e-05	4.52186e-05	4.49226e-05	4.4624e-05	4.42929e-05	4.40083e-05	4.36687e-05	4.3066e-05	4.24241e-05	4.18127e-05	4.05366e-05	3.93187e-05	3.80325e-05	3.60694e-05	3.24862e-05	2.87853e-05	2.53994e-05
1633.03	16.846	6.18555e-06	4.96004e-06	4.91398e-06	4.88146e-06	4.86553e-06	4.79804e-06	4.76597e-06	4.76168e-06	4.67381e-06	4.63188e-06	4.49314e-06	4.31835e-06	4.20659e-06	4.12396e-06	3.62924e-06	3.21319e-06	2.84266e-06
1649.87	16.848	2.53994e-05	2.05968e-05	2.04998e-05	2.03397e-05	2.02411e-05	2.01492e-05	2.00292e-05	1.9748e-05	1.9491e-05	1.93014e-05	1.88319e-05	1.83379e-05	1.77701e-05	1.69643e-05	1.55168e-05	1.39019e-05	1.24154e-05
1666.72	16.845	2.05305e-06	1.47795e-06	1.52008e-06	1.52752e-06	1.50694e-06	1.49753e-06	1.46958e-06	1.43729e-06	1.41844e-06	1.39715e-06	1.3162e-06	1.26016e-06	1.29829e-06	1.20126e-06	1.05464e-06	9.42861e-07	8.16576e-07
1683.56	16.849	1.65566e-07	1.72226e-07	8.98915e-08	1.0191e-07	1.44657e-07	1.61634e-07	7.33867e-08	2.07523e-07	1.68087e-07	1.27713e-07	1.27222e-07	1.77072e-07	1.09013e-07	1.15609e-07	1.09159e-07	8.14069e-08	8.51099e-08
1700.41	16.845	2.05239e-08	1.26577e-08	1.11617e-08	0	2.46447e-08	1.35779e-09	1.63552e-08	1.30943e-08	2.23913e-08	1.35785e-08	0	1.14349e-08	3.03525e-09	3.9682e-09	-3.0832e-09	-9.25962e-09	5.95648e-10
1717.26	16.846	3.71108e-09	0	-3.89738e-25	0	1.17217e-08	1.69429e-08	1.55461e-08	9.812e-09	1.32387e-08	1.80446e-08	1.80547e-09	5.26912e-24	8.2938e-10	4.44592e-09	1.97892e-09	-4.55347e-10	-3.30479e-08
1734.1	16.849	0	6.93721e-09	0	3.62175e-09	0	1.15965e-08	1.19034e-08	0	0	0	0	0	-4.0839e-10	7.73085e-09	-1.54868e-09	2.50919e-09	0
1750.95	16.845	1.19953e-07	7.23698e-08	8.05008e-08	3.15736e-08	5.88859e-08	7.20602e-08	6.24653e-08	4.17712e-08	5.44455e-08	5.87694e-08	4.25988e-08	8.89305e-08	4.60965e-08	5.58926e-08	5.05147e-08	4.22581e-08	3.13263e-08
1767.8	16.845	1.11849e-07	7.49426e-08	3.93519e-08	5.37883e-08	1.29191e-07	5.09339e-08	4.02055e-08	6.40848e-08	8.92647e-08	4.77627e-08	2.48656e-08	3.98787e-08	5.8488e-08	3.85396e-08	3.79276e-08	2.25702e-08	1.92925e-08
1784.64	16.849	1.38314e-07	3.05481e-08	9.76323e-08	1.43352e-07	1.59442e-07	1.02375e-07	4.15506e-08	9.29923e-08	6.16272e-08	1.20577e-07	2.83609e-08	7.87741e-08	7.27119e-08	5.9503e-08	3.15159e-08	3.49102e-08	3.93421e-08
1801.49	16.845	1.00732e-07	4.98881e-08	4.38707e-08	5.03396e-08	4.07487e-08	6.2572e-08	2.39714e-08	3.22125e-08	5.91767e-08	3.03984e-08	1.5676e-08	2.83642e-08	2.59357e-08	2.92022e-08	3.43435e-08	4.73595e-09	1.1513e-08
1818.34	16.846	6.11526e-08	0	4.29498e-10	4.68542e-09	1.28491e-08	0	0	1.92423e-09	3.67041e-09	5.43346e-09	0	6.22324e-09	5.1159e-09	3.34796e-09	0	2.43781e-09	0
1835.18	16.849	0	0	0	0	0	0	0	0	0	0	0	0	0	0	0	0	0
1852.03	16.846	0	0	0	0	0	0	0	0	0	0	0	0	0	0	0	0	0
1868.88	16.845	3.05491e-07	6.82578e-07	7.0169e-07	7.29379e-07	7.10619e-07	7.08803e-07	6.61084e-07	6.79019e-07	7.06449e-07	7.59632e-07	7.04432e-07	7.29471e-07	7.15281e-07	7.79202e-07	8.11956e-07	7.89895e-07	8.09816e-07
1885.72	16.848	3.38412e-05	2.3434e-05	2.34231e-05	2.334e-05	2.33104e-05	2.32779e-05	2.32161e-05	2.31006e-05	2.29386e-05	2.28852e-05	2.25709e-05	2.22618e-05	2.183e-05	2.12083e-05	1.98015e-05	1.80632e-05	1.64722e-05
1902.57	16.845	1.90504e-06	7.28707e-07	7.3521e-07	7.6823e-07	6.90421e-07	6.97854e-07	7.75128e-07	7.54078e-07	7.16128e-07	7.58906e-07	6.94593e-07	6.29283e-07	7.16695e-07	5.38395e-07	6.97087e-07	5.1909e-07	4.05131e-07
1919.41	16.848	5.6148e-07	2.79707e-07	2.87185e-07	2.68773e-07	3.73453e-07	3e-07	2.78096e-07	2.70006e-07	2.93542e-07	3.37121e-07	2.33398e-07	2.4171e-07	2.50102e-07	2.392e-07	2.05976e-07	1.1183e-07	1.10389e-07
1936.26	16.849	5.05117e-05	2.29011e-05	2.26544e-05	2.23452e-05	2.21362e-05	2.18528e-05	2.15596e-05	2.10619e-05	2.05081e-05	1.99755e-05	1.89314e-05	1.79379e-05	1.69037e-05	1.5351e-05	1.26373e-05	9.94503e-06	7.87978e-06
1953.11	16.845	0.00114912	0.000827763	0.000823077	0.000818316	0.000813482	0.000808669	0.000803776	0.000793826	0.000783719	0.000773349	0.00075199	0.000729612	0.000706581	0.000669081	0.000595263	0.000510972	0.000440655
1969.96	16.845	0.000653397	0.000509877	0.000506778	0.00050379	0.00050065	0.000497529	0.000494402	0.000488118	0.000481741	0.000475272	0.000462086	0.000448523	0.000434867	0.000412797	0.000369167	0.000318925	0.000274528
1986.8	16.846	4.73276e-05	3.69425e-05	3.66821e-05	3.63809e-05	3.61594e-05	3.59484e-05	3.5592e-05	3.50839e-05	3.46094e-05	3.40993e-05	3.30381e-05	3.19925e-05	3.09308e-05	2.9268e-05	2.60178e-05	2.22811e-05	1.89524e-05
2003.65	16.846	0.00227549	0.00173642	0.00172688	0.00171724	0.00170751	0.00169761	0.00168763	0.00166742	0.00164674	0.00162552	0.00158167	0.00153537	0.00148694	0.00140732	0.0012478	0.00106172	0.000910197
2020.49	16.848	0.00129184	0.00100139	0.000995177	0.000988933	0.000982634	0.00097634	0.000969996	0.000957207	0.000944265	0.000931171	0.000904364	0.000876637	0.00084853	0.000802853	0.000712083	0.000606797	0.000516107
2037.34	16.846	0.000288143	0.00023226	0.000230856	0.000229389	0.000228022	0.000226525	0.000225089	0.00022221	0.000219295	0.000216364	0.000210452	0.000204375	0.000198375	0.000188686	0.000169295	0.000146656	0.000125727
2054.19	16.848	0.000938599	0.000744809	0.000740288	0.000735674	0.000731126	0.000726518	0.000721881	0.000712609	0.000703226	0.000693751	0.000674413	0.000654527	0.000634636	0.000602388	0.00053744	0.000461092	0.000393052
2071.03	16.845	0.000718623	0.000563922	0.000560167	0.000556475	0.000552689	0.00054894	0.000545164	0.000537598	0.000529995	0.000522305	0.000506779	0.000490861	0.000475095	0.000449706	0.000399127	0.000340218	0.000287493
2087.88	16.846	0.000261557	0.000204126	0.000202668	0.00020113	0.00019964	0.000198156	0.000196676	0.000193686	0.000190697	0.00018769	0.000181646	0.000175506	0.000169505	0.000159915	0.000140976	0.0001193	9.94221e-05
2104.73	16.846	3.86063e-05	3.10246e-05	3.07794e-05	3.05132e-05	3.03069e-05	3.00982e-05	2.99029e-05	2.95006e-05	2.90853e-05	2.8671e-05	2.78396e-05	2.69966e-05	2.61791e-05	2.48035e-05	2.21883e-05	1.90939e-05	1.60688e-05
2121.57	16.849	7.94894e-06	6.15892e-06	6.17796e-06	6.21233e-06	6.15297e-06	6.10818e-06	6.06082e-06	5.96271e-06	5.88763e-06	5.79879e-06	5.61837e-06	5.44492e-06	5.28166e-06	5.01623e-06	4.451e-06	3.78517e-06	3.22865e-06
2138.42	16.845	2.19694e-06	1.83281e-06	1.68086e-06	1.67993e-06	1.69679e-06	1.68226e-06	1.676e-06	1.64824e-06	1.63181e-06	1.59989e-06	1.54311e-06	1.49755e-06	1.45363e-06	1.38013e-06	1.26922e-06	1.08676e-06	9.7435e-07
2155.27	16.848	1.30997e-05	1.11617e-05	1.10288e-05	1.09657e-05	1.09217e-05	1.08608e-05	1.07991e-05	1.06908e-05	1.05781e-05	1.0471e-05	1.02567e-05	1.0039e-05	9.79975e-06	9.42693e-06	8.61229e-06	7.61779e-06	6.5991e-06
2172.11	16.846	5.47199e-06	4.41464e-06	4.40149e-06	4.37497e-06	4.35622e-06	4.32037e-06	4.28169e-06	4.21803e-06	4.17288e-06	4.1205e-06	4.01905e-06	3.89857e-06	3.79023e-06	3.60951e-06	3.2387e-06	2.84049e-06	2.38766e-06
2188.96	16.846	7.97528e-07	6.58385e-07	6.49968e-07	6.47481e-07	6.49728e-07	6.38537e-07	6.30499e-07	6.37973e-07	5.99785e-07	6.1244e-07	5.86616e-07	5.92028e-07	5.51782e-07	5.28322e-07	4.58599e-07	2.98443e-07	3.25485e-07
2205.81	16.845	1.71357e-07	1.43882e-07	1.2524e-07	9.8531e-08	1.09372e-07	1.21031e-07	1.16758e-07	1.24079e-07	1.09514e-07	1.0281e-07	1.13874e-07	1.06151e-07	1.02961e-07	6.07778e-08	1.46544e-07	6.54567e-08	7.39817e-08
2222.65	16.85	2.16076e-07	1.67507e-07	1.6239e-07	1.64383e-07	1.67319e-07	1.59147e-07	1.64323e-07	1.602e-07	1.3589e-07	1.57659e-07	1.33701e-07	1.76068e-07	1.68573e-07	1.02658e-07	5.76914e-08	7.80867e-08	9.02952e-08
2239.5	16.846	2.47842e-08	3.10065e-08	3.82495e-08	3.14402e-08	4.79572e-08	2.9739e-08	2.99765e-08	4.41137e-08	2.40608e-08	3.72044e-08	2.68405e-08	3.48659e-08	5.412e-09	1.83392e-08	4.05884e-08	2.9019e-08	2.26655e-08
2256.35	16.845	1.58286e-07	1.45056e-07	1.53501e-07	1.44462e-07	1.55928e-07	1.52028e-07	1.664e-07	1.44964e-07	1.35297e-07	1.42083e-07	1.39063e-07	1.25325e-07	1.49668e-07	7.70922e-08	6.94659e-08	8.42564e-08	8.39211e-08
2273.19	16.846	6.64878e-08	6.76246e-08	5.22066e-08	5.76505e-08	3.5572e-08	3.69195e-08	4.66031e-08	3.98293e-08	6.0471e-08	6.09873e-08	2.02035e-08	6.24382e-08	1.39491e-07	7.87553e-08	6.65248e-08	7.26133e-08	3.11174e-08
2290.04	16.848	0	1.83195e-08	5.41764e-09	2.01238e-08	1.5387e-08	1.3715e-08	3.09718e-08	6.62849e-09	4.09173e-09	1.02073e-09	1.37952e-08	1.34429e-08	2.16436e-08	0	0	-1.03706e-08	-1.2198e-09
2306.89	16.845	0	4.63566e-09	0	6.82688e-09	0	6.97394e-09	9.24133e-09	5.43238e-09	3.85741e-09	0	1.40468e-08	0	2.37034e-08	0	0	0	9.2023e-09
2323.73	16.848	0	0	0	1.82467e-09	0	1.13806e-08	0	0	0	4.18229e-09	-5.29286e-09	0	9.11803e-09	0	0	0	8.5814e-09
2340.58	16.846	0	0	3.74507e-09	0	0	0	0	0	0	1.65571e-08	-7.71837e-09	0	0	0	0	6.85484e-10	0
2357.43	16.848	0	-2.48657e-09	2.4649e-09	0	-2.22931e-09	0	0	0	2.66228e-09	0	1.18929e-08	1.84667e-08	0	0	0	3.61547e-09	0
2374.27	16.846	0	0	0	3.12622e-09	-4.76179e-09	2.39063e-08	8.86414e-09	0	0	0	0	0	0	0	0	7.09554e-10	0
2391.12	16.845	0	0	-8.74497e-09	0	0	0	0	0	3.02574e-08	-1.89446e-08	-1.70249e-08	0	0	0	1.93322e-08	8.74145e-09	7.50363e-09
2407.96	16.848	0	4.82997e-09	-4.7423e-09	6.42079e-09	6.23026e-09	0	3.70987e-09	0	0	0	0	0	1.51842e-08	0	0	-5.57729e-09	0
2424.81	16.848	0	5.80698e-09	0	1.33113e-08	-1.00863e-09	0	6.47615e-09	0	0	2.04222e-09	-2.12356e-09	0	0	0	0	-2.58564e-09	0
2441.66	16.845	1.01529e-08	-7.2253e-25	5.17694e-09	0	3.84303e-24	0	5.77232e-09	4.29323e-09	1.87748e-08	2.09044e-09	1.74663e-08	2.76192e-09	9.79342e-09	1.59796e-08	2.19067e-09	-3.0661e-09	1.11666e-08
2458.5	16.849	3.7124e-08	7.16919e-09	0	5.54364e-09	0	1.03929e-08	0	3.73673e-08	0	1.01826e-08	3.77812e-09	0	4.6764e-08	1.22002e-08	0	-7.55327e-09	-2.26904e-09
2475.35	16.845	2.05627e-07	1.24506e-07	6.98371e-08	8.93226e-08	8.65836e-08	1.05285e-07	1.23741e-07	7.60721e-08	1.21319e-07	6.99569e-08	6.0921e-08	1.00907e-07	1.15255e-07	1.01399e-07	3.52952e-08	3.69703e-08	5.16665e-08
2492.2	16.846	2.95839e-06	2.12854e-06	2.11331e-06	2.06476e-06	2.00081e-06	2.05567e-06	2.02596e-06	1.95859e-06	2.0041e-06	1.87772e-06	1.84092e-06	1.83092e-06	1.71431e-06	1.7426e-06	1.41916e-06	1.17126e-06	9.67312e-07
2509.04	16.849	1.16474e-06	8.76778e-07	8.64139e-07	8.7075e-07	8.21764e-07	8.78074e-07	8.64425e-07	8.18321e-07	8.4359e-07	8.36753e-07	7.65537e-07	8.02134e-07	7.22734e-07	7.85503e-07	6.47144e-07	5.52549e-07	4.90881e-07

## Sheet: k_GF5B
Wavelength	FWHM	k_Summer_L	k_Summer_M	k_Summer_H	k_Winter_L	k_Winter_M	k_Winter_H	k_1976_L	k_1976_M	k_1976_H
1009	8.546	0	0	0	0	0	0	0	0	0	0	0	0	0	0	0	0	0
1017.42	8.546	0	0	0	0	0	0	0	0	0	0	0	0	0	0	0	0	0
1025.83	8.546	0	0	0	0	0	0	0	0	0	0	0	0	0	0	0	0	0
1034.25	8.546	2.66725e-07	1.98696e-07	1.98535e-07	2.00464e-07	1.94881e-07	1.9828e-07	1.94211e-07	1.89002e-07	1.84893e-07	1.86118e-07	1.86043e-07	1.74605e-07	1.67646e-07	1.60546e-07	1.4514e-07	1.34624e-07	1.11038e-07
1042.67	8.546	2.64239e-07	1.99025e-07	1.99935e-07	2.01962e-07	2.03524e-07	1.88825e-07	1.91421e-07	1.88479e-07	1.84312e-07	1.7168e-07	1.82863e-07	1.81175e-07	1.62213e-07	1.58563e-07	1.5134e-07	1.20224e-07	1.50262e-07
1051.08	8.546	1.58156e-06	1.21481e-06	1.20782e-06	1.20865e-06	1.17678e-06	1.1938e-06	1.16243e-06	1.16871e-06	1.15453e-06	1.14898e-06	1.10726e-06	1.07915e-06	1.04042e-06	9.83853e-07	9.06961e-07	8.10022e-07	7.1467e-07
1059.5	8.546	1.36412e-07	8.31561e-08	8.3135e-08	8.27659e-08	9.77096e-08	8.93335e-08	8.27806e-08	8.33039e-08	1.00023e-07	8.19321e-08	9.48508e-08	7.52739e-08	8.61279e-08	6.01149e-08	5.83027e-08	5.22337e-08	5.38742e-08
1067.92	8.546	2.16444e-07	1.71111e-07	1.77663e-07	1.67055e-07	1.60246e-07	1.76036e-07	1.59762e-07	1.72044e-07	1.59784e-07	1.7176e-07	1.45505e-07	1.49614e-07	1.31504e-07	1.16836e-07	1.34745e-07	1.13998e-07	9.38608e-08
1076.33	8.546	2.56339e-08	1.71983e-08	2.78067e-08	3.78472e-08	2.15901e-08	2.2876e-08	1.81626e-08	2.77866e-08	2.04916e-08	2.25693e-08	3.56289e-08	4.09282e-08	2.45629e-09	1.05922e-08	1.26693e-08	1.8215e-08	1.58851e-08
1084.75	8.546	2.80986e-09	0	0	0	1.32962e-09	0	0	1.35995e-09	0	0	-1.36883e-09	0	0	0	0	-1.00322e-08	0
1093.17	8.546	0	2.6151e-09	0	0	0	0	4.29535e-09	8.38708e-09	0	2.95486e-09	0	0	0	0	0	0	0
1101.58	8.546	0	0	0	0	0	-1.22922e-09	0	2.44176e-09	0	0	0	0	0	0	0	0	0
1110	8.546	0	0	0	0	0	0	2.32635e-09	0	0	0	0	0	0	0	0	0	0
1118.42	8.546	0	0	0	0	7.73717e-25	0	0	0	7.99899e-10	-2.76677e-09	0	0	0	0	7.56825e-09	0	7.68156e-09
1126.83	8.546	0	0	0	2.70076e-09	0	0	0	0	0	0	5.13877e-09	0	0	0	0	0	0
1135.25	8.546	0	0	0	6.03596e-25	0	0	0	6.60231e-09	0	0	5.16293e-09	0	3.86121e-24	0	0	0	8.32736e-10
1143.67	8.546	0	0	0	0	0	0	0	0	0	0	0	0	0	0	0	0	0
1152.08	8.546	0	4.86717e-09	0	0	0	0	0	0	0	0	0	0	0	0	0	0	0
1160.5	8.546	0	0	0	0	-4.21716e-09	0	0	0	0	0	0	0	0	0	0	0	0
1168.92	8.546	0	0	0	0	0	0	0	0	0	0	0	7.99479e-09	0	0	0	0	0
1177.33	8.546	0	0	0	0	0	0	0	0	0	0	0	0	0	0	0	0	0
1185.75	8.546	0	0	0	0	0	0	0	0	0	0	0	0	0	0	0	0	0
1194.17	8.546	0	0	0	0	0	0	0	0	0	0	0	0	0	0	0	0	0
1202.58	8.546	2.53094e-05	2.00241e-05	1.99122e-05	1.97999e-05	1.97035e-05	1.95829e-05	1.94574e-05	1.92169e-05	1.89885e-05	1.87671e-05	1.82877e-05	1.78128e-05	1.73766e-05	1.66367e-05	1.5331e-05	1.39638e-05	1.2719e-05
1211	8.546	1.70227e-05	1.33333e-05	1.32418e-05	1.3166e-05	1.30997e-05	1.30206e-05	1.29162e-05	1.27773e-05	1.25715e-05	1.24363e-05	1.20814e-05	1.17715e-05	1.13965e-05	1.09126e-05	9.95194e-06	9.02295e-06	8.16051e-06
1219.42	8.546	2.68543e-05	2.10799e-05	2.09568e-05	2.08268e-05	2.06616e-05	2.05826e-05	2.04564e-05	2.01972e-05	1.99179e-05	1.96888e-05	1.91611e-05	1.86476e-05	1.80949e-05	1.73361e-05	1.5882e-05	1.44547e-05	1.29983e-05
1227.83	8.546	6.21316e-06	4.66665e-06	4.61784e-06	4.57588e-06	4.54755e-06	4.53488e-06	4.49081e-06	4.40307e-06	4.33314e-06	4.29998e-06	4.13245e-06	3.99181e-06	3.85278e-06	3.6738e-06	3.31677e-06	3.00766e-06	2.66922e-06
1236.25	8.546	1.12783e-06	8.44667e-07	8.43555e-07	8.60215e-07	8.48831e-07	8.34917e-07	8.31906e-07	8.23244e-07	8.18341e-07	8.04677e-07	7.64473e-07	7.26513e-07	7.09994e-07	6.6919e-07	6.19185e-07	4.83196e-07	4.16969e-07
1244.67	8.546	9.56697e-08	5.77576e-08	3.75444e-08	5.54056e-08	6.66633e-08	6.20383e-08	7.81972e-08	5.77223e-08	5.30609e-08	4.90519e-08	5.02131e-08	6.40571e-08	5.39262e-08	6.82095e-08	2.52802e-08	1.71491e-08	6.34029e-08
1253.08	8.546	2.27812e-07	1.73382e-07	1.88625e-07	1.75801e-07	1.72593e-07	1.7237e-07	1.917e-07	1.98189e-07	1.77946e-07	1.48792e-07	1.64991e-07	1.73641e-07	1.41331e-07	2.0904e-07	2.51087e-07	1.96956e-07	1.01008e-07
1261.5	8.546	2.46319e-07	1.58737e-07	1.89489e-07	1.689e-07	1.67758e-07	1.62942e-07	1.67918e-07	1.91223e-07	1.65091e-07	1.87736e-07	1.67608e-07	2.01408e-07	1.46577e-07	1.84762e-07	4.06036e-08	1.52425e-07	1.01763e-07
1269.92	8.546	6.12434e-08	4.79662e-08	6.34871e-08	7.85177e-08	3.44981e-08	5.31458e-08	6.1424e-08	4.24099e-08	5.64052e-08	5.92281e-08	3.18422e-08	3.26502e-08	3.32994e-08	3.82235e-08	2.61857e-08	5.99555e-09	4.29844e-08
1278.33	8.546	0	-1.21136e-09	8.00251e-09	0	1.77408e-24	0	0	-5.74209e-09	0	0	0	0	-1.28745e-08	0	0	0	-4.00869e-09
1286.75	8.546	7.54157e-07	5.73885e-07	5.85256e-07	5.72533e-07	5.53936e-07	5.55324e-07	5.74882e-07	5.58298e-07	5.67577e-07	5.5393e-07	5.32495e-07	5.26729e-07	4.90974e-07	4.55105e-07	3.7164e-07	3.80443e-07	3.30357e-07
1295.17	8.546	1.82344e-06	1.45382e-06	1.4581e-06	1.39554e-06	1.41159e-06	1.44324e-06	1.41543e-06	1.3949e-06	1.36766e-06	1.33982e-06	1.34049e-06	1.30395e-06	1.26317e-06	1.21923e-06	1.11072e-06	9.95378e-07	8.96023e-07
1303.58	8.546	1.87139e-08	1.22724e-08	1.85133e-08	1.26782e-08	3.69785e-08	2.61012e-08	2.86188e-08	9.77944e-09	3.09621e-08	3.24786e-08	2.72798e-08	8.37031e-09	3.0169e-08	9.19221e-09	1.25229e-08	0	1.65597e-08
1312	8.546	4.0516e-06	3.20458e-06	3.15427e-06	3.14054e-06	3.1373e-06	3.12185e-06	3.08047e-06	3.0523e-06	3.01233e-06	2.96606e-06	2.89768e-06	2.85379e-06	2.74955e-06	2.61688e-06	2.42075e-06	2.17971e-06	1.9646e-06
1320.42	8.546	5.41543e-06	4.16819e-06	4.17046e-06	4.12395e-06	4.11119e-06	4.08268e-06	4.03954e-06	4.00568e-06	3.93758e-06	3.87945e-06	3.79881e-06	3.68573e-06	3.58932e-06	3.36373e-06	3.05816e-06	2.714e-06	2.53624e-06
1328.83	8.546	9.43622e-08	4.11678e-08	6.13753e-08	4.62718e-08	4.14177e-08	4.66226e-08	5.10662e-08	4.11935e-08	4.60976e-08	3.75466e-08	3.11078e-08	5.5385e-08	4.37679e-08	5.39408e-08	4.57833e-08	1.35526e-08	1.88196e-08
1337.25	8.546	2.63928e-06	2.0537e-06	2.07917e-06	2.03835e-06	2.04363e-06	2.01861e-06	1.96221e-06	2.00822e-06	1.93955e-06	1.90526e-06	1.89061e-06	1.7893e-06	1.72304e-06	1.73044e-06	1.62784e-06	1.46311e-06	1.28724e-06
1345.66	8.546	2.45134e-06	1.59603e-06	1.57541e-06	1.57561e-06	1.53329e-06	1.5367e-06	1.53679e-06	1.54392e-06	1.49816e-06	1.39967e-06	1.37522e-06	1.35903e-06	1.29024e-06	1.2061e-06	1.14264e-06	9.81549e-07	8.61661e-07
1354.08	8.546	2.42807e-07	5.37727e-08	2.30681e-08	9.05052e-08	6.01499e-08	2.07284e-08	1.4381e-07	3.7276e-08	6.32301e-08	3.03238e-08	7.66326e-08	8.61457e-08	4.2809e-08	3.30135e-08	4.593e-08	1.70784e-08	2.36757e-08
1362.5	8.546	1.43451e-08	2.40022e-08	2.34623e-08	1.1243e-08	1.93502e-08	2.48271e-08	1.10692e-08	2.10934e-08	8.96046e-09	2.04939e-08	5.92197e-09	2.82296e-08	2.45143e-08	1.8211e-09	1.64902e-08	2.63918e-08	1.22104e-08
1370.91	8.546	1.87965e-07	1.11888e-07	1.34683e-07	1.22091e-07	1.24635e-07	1.10958e-07	1.32281e-07	1.3973e-07	1.05416e-07	1.42421e-07	1.48444e-07	1.4736e-07	1.35283e-07	1.53458e-07	1.53797e-07	1.29556e-07	1.31979e-07
1379.33	8.546	1.58407e-07	1.58515e-07	7.03938e-08	6.80182e-08	6.43507e-08	9.86243e-08	4.8404e-08	1.70903e-07	7.07219e-08	6.14232e-08	9.78679e-08	2.41305e-08	2.65101e-08	6.53032e-08	7.64989e-08	5.42101e-08	5.69987e-08
1387.75	8.546	2.30793e-09	0	3.59043e-09	0	5.85108e-09	5.31808e-09	5.83189e-09	2.34463e-09	0	4.15174e-09	6.5554e-09	8.94616e-09	0	0	1.38154e-08	5.40665e-09	1.19546e-08
1396.16	8.546	0	0	2.33165e-09	2.03495e-09	0	2.34913e-09	3.3353e-09	9.68909e-09	2.65454e-09	0	-1.26711e-24	0	3.86675e-09	0	4.35798e-09	0	6.74875e-09
1404.58	8.546	0	0	1.96101e-08	0	0	0	-5.47754e-09	0	0	0	0	0	0	0	3.90551e-09	0	0
1413	8.546	8.2671e-11	0	2.09951e-09	4.23905e-08	0	0	0	0	0	0	0	0	-3.38559e-08	0	0	0	0
1421.41	8.546	0	0	0	1.54226e-08	0	0	3.46461e-08	1.45065e-09	3.25265e-09	2.91549e-09	1.36034e-09	4.00693e-08	0	2.67723e-09	3.96849e-09	6.28641e-09	3.22111e-09
1429.83	8.546	0.000119599	0.000111839	0.00011179	0.000111603	0.000111529	0.000111434	0.000111299	0.000110982	0.000110699	0.000110354	0.000109563	0.000108655	0.000107618	0.000105707	0.000101372	9.59768e-05	9.03e-05
1438.25	8.546	0.000273456	0.000190342	0.000189334	0.00018832	0.000187286	0.000186107	0.00018523	0.000183005	0.000180902	0.000178609	0.000174049	0.000169396	0.000164642	0.000157095	0.000143474	0.000129348	0.000116494
1446.66	8.546	6.30083e-05	4.19907e-05	4.17217e-05	4.14011e-05	4.11534e-05	4.0784e-05	4.0467e-05	3.98529e-05	3.92908e-05	3.85849e-05	3.73099e-05	3.59863e-05	3.47205e-05	3.2795e-05	2.92073e-05	2.56913e-05	2.26565e-05
1455.08	8.546	2.66165e-06	1.78955e-06	1.79469e-06	1.72769e-06	1.7039e-06	1.75537e-06	1.71443e-06	1.6408e-06	1.68813e-06	1.61231e-06	1.56898e-06	1.46114e-06	1.3969e-06	1.22965e-06	1.27469e-06	9.85649e-07	8.31185e-07
1463.5	8.546	1.10196e-07	2.16553e-08	7.27342e-08	8.61867e-08	6.82283e-08	3.8704e-08	7.63497e-08	5.25698e-08	1.03845e-08	3.04605e-08	5.49958e-08	9.21435e-08	5.61332e-08	2.07888e-08	2.60238e-08	4.0456e-08	2.66696e-08
1471.91	8.546	1.01356e-05	8.04329e-06	8.04382e-06	8.04606e-06	8.02455e-06	7.92575e-06	7.93243e-06	7.79826e-06	7.79624e-06	7.65909e-06	7.53489e-06	7.34329e-06	7.17991e-06	6.8931e-06	6.39829e-06	5.87748e-06	5.35759e-06
1480.33	8.546	7.66711e-06	5.9024e-06	5.90051e-06	5.81901e-06	5.7555e-06	5.7823e-06	5.7659e-06	5.66751e-06	5.57653e-06	5.53041e-06	5.46852e-06	5.26542e-06	5.12005e-06	4.86224e-06	4.52877e-06	4.11747e-06	3.71433e-06
1488.75	8.546	9.12199e-07	6.39908e-07	6.57022e-07	6.51334e-07	6.22639e-07	6.65267e-07	6.54629e-07	6.14867e-07	6.73614e-07	6.26242e-07	5.35197e-07	5.70763e-07	4.67611e-07	5.25328e-07	4.84054e-07	4.0949e-07	3.74244e-07
1497.16	8.546	3.60686e-06	2.85082e-06	2.81791e-06	2.85189e-06	2.77592e-06	2.75795e-06	2.78772e-06	2.75651e-06	2.68575e-06	2.59648e-06	2.57092e-06	2.56649e-06	2.37413e-06	2.37561e-06	2.13722e-06	1.91299e-06	1.72839e-06
1505.58	8.546	1.13339e-07	1.02249e-07	9.32658e-08	6.4252e-08	8.77368e-08	8.75976e-08	1.09588e-07	6.78382e-08	1.31775e-07	7.66118e-08	5.57625e-08	9.57524e-08	5.60072e-08	5.00233e-08	6.17616e-08	6.07784e-08	5.63709e-08
1514	8.546	2.07001e-08	1.36979e-08	2.48158e-24	3.24245e-08	2.96904e-08	1.70824e-08	9.22226e-09	0	0	1.13971e-08	3.66754e-08	5.71525e-24	1.75153e-08	1.42068e-08	5.84923e-10	6.27941e-09	-1.60888e-09
1522.41	8.546	1.38984e-06	1.05236e-06	9.86599e-07	9.94161e-07	9.89573e-07	9.62124e-07	9.9896e-07	9.65013e-07	9.05703e-07	8.73479e-07	8.8521e-07	8.01019e-07	8.05882e-07	7.56495e-07	6.0877e-07	5.9076e-07	5.11235e-07
1530.83	8.546	2.12903e-05	1.65628e-05	1.6458e-05	1.63869e-05	1.62626e-05	1.61808e-05	1.60309e-05	1.5803e-05	1.56002e-05	1.53912e-05	1.49361e-05	1.45055e-05	1.4027e-05	1.3291e-05	1.20794e-05	1.08236e-05	9.65963e-06
1539.25	8.546	3.41859e-05	2.7685e-05	2.7509e-05	2.74477e-05	2.72215e-05	2.70791e-05	2.69458e-05	2.6601e-05	2.62911e-05	2.60306e-05	2.52881e-05	2.46929e-05	2.40025e-05	2.29568e-05	2.11143e-05	1.9108e-05	1.72642e-05
1547.66	8.546	3.55198e-06	2.76681e-06	2.67223e-06	2.66478e-06	2.62014e-06	2.65141e-06	2.62308e-06	2.52929e-06	2.49904e-06	2.47778e-06	2.46364e-06	2.42248e-06	2.34007e-06	2.12121e-06	1.88412e-06	1.67486e-06	1.47809e-06
1556.08	8.546	3.11437e-07	2.44899e-07	2.17147e-07	2.56047e-07	2.30316e-07	2.47294e-07	2.08931e-07	2.12828e-07	2.54842e-07	2.9154e-07	2.47414e-07	2.18655e-07	1.38223e-07	1.94606e-07	1.70683e-07	1.59974e-07	1.10761e-07
1564.5	8.546	5.80023e-06	4.13464e-06	4.13657e-06	4.09529e-06	4.05176e-06	4.01134e-06	3.96922e-06	3.8781e-06	3.86717e-06	3.62652e-06	3.63547e-06	3.48592e-06	3.28587e-06	3.17632e-06	2.68135e-06	2.30258e-06	1.97725e-06
1572.91	8.546	0.00021091	0.000167371	0.000166346	0.000165341	0.000164306	0.000163278	0.000162254	0.000160184	0.000158106	0.000156017	0.000151814	0.00014749	0.000143212	0.000136654	0.000124391	0.000111581	9.97661e-05
1581.33	8.546	0.000126239	0.000100357	9.97331e-05	9.91211e-05	9.85062e-05	9.79117e-05	9.72912e-05	9.60722e-05	9.48286e-05	9.34757e-05	9.095e-05	8.83447e-05	8.59044e-05	8.17402e-05	7.4442e-05	6.67262e-05	5.9603e-05
1589.75	8.546	3.43097e-06	2.41807e-06	2.44701e-06	2.41355e-06	2.34979e-06	2.34474e-06	2.3055e-06	2.28685e-06	2.21243e-06	2.23514e-06	2.14153e-06	1.99105e-06	1.93789e-06	1.75057e-06	1.56936e-06	1.33411e-06	1.14732e-06
1598.16	8.546	8.51846e-05	6.71135e-05	6.6737e-05	6.63381e-05	6.58623e-05	6.54329e-05	6.49888e-05	6.41405e-05	6.33138e-05	6.24026e-05	6.0667e-05	5.88553e-05	5.71242e-05	5.42871e-05	4.91964e-05	4.38476e-05	3.89912e-05
1606.58	8.546	0.000179606	0.000144879	0.000144091	0.000143261	0.000142438	0.000141627	0.000140784	0.00013908	0.000137365	0.000135643	0.000132246	0.000128727	0.000125153	0.000119711	0.000109352	9.83807e-05	8.82271e-05
1615	8.546	6.61211e-05	5.11349e-05	5.0801e-05	5.0454e-05	5.00602e-05	4.9707e-05	4.93195e-05	4.86348e-05	4.78814e-05	4.71682e-05	4.56526e-05	4.42682e-05	4.27797e-05	4.04761e-05	3.63424e-05	3.20795e-05	2.81993e-05
1623.41	8.546	5.5325e-06	3.92177e-06	3.90202e-06	3.85626e-06	3.83909e-06	3.83104e-06	3.76631e-06	3.66365e-06	3.5861e-06	3.55495e-06	3.42572e-06	3.2297e-06	3.04627e-06	2.9017e-06	2.49164e-06	2.11534e-06	1.78746e-06
1631.83	8.546	4.10267e-06	3.38856e-06	3.3444e-06	3.31198e-06	3.3207e-06	3.26177e-06	3.2441e-06	3.26874e-06	3.20344e-06	3.17526e-06	3.07026e-06	2.96496e-06	2.91984e-06	2.89402e-06	2.52974e-06	2.2461e-06	1.98365e-06
1640.25	8.546	2.98403e-05	2.39665e-05	2.38129e-05	2.37145e-05	2.35766e-05	2.33707e-05	2.32631e-05	2.29749e-05	2.26612e-05	2.24617e-05	2.18624e-05	2.11729e-05	2.04992e-05	1.97313e-05	1.78566e-05	1.59444e-05	1.42321e-05
1648.66	8.546	2.92826e-05	2.38759e-05	2.37581e-05	2.35833e-05	2.34981e-05	2.33871e-05	2.32414e-05	2.29068e-05	2.26207e-05	2.24195e-05	2.1876e-05	2.13357e-05	2.06605e-05	1.98115e-05	1.81217e-05	1.62814e-05	1.45562e-05
1657.08	8.546	5.65668e-06	4.22124e-06	4.25635e-06	4.19832e-06	4.12886e-06	4.07301e-06	4.1009e-06	4.02744e-06	3.91193e-06	3.9141e-06	3.78693e-06	3.65261e-06	3.51147e-06	3.22824e-06	2.89857e-06	2.50856e-06	2.17658e-06
1665.5	8.546	2.55746e-06	1.84908e-06	1.88662e-06	1.88976e-06	1.8593e-06	1.8635e-06	1.82626e-06	1.77866e-06	1.773e-06	1.72103e-06	1.6078e-06	1.58468e-06	1.56649e-06	1.48632e-06	1.30936e-06	1.17313e-06	1.01215e-06
1673.91	8.546	6.67625e-07	4.88397e-07	5.40678e-07	5.08043e-07	5.38907e-07	5.61146e-07	3.96901e-07	4.59895e-07	4.28624e-07	5.19701e-07	4.94376e-07	4.28932e-07	5.08709e-07	3.3663e-07	3.42573e-07	3.09575e-07	2.55342e-07
1682.33	8.546	1.78714e-07	1.63983e-07	7.61792e-08	8.76704e-08	1.34969e-07	1.82606e-07	8.01087e-08	2.41088e-07	2.00577e-07	1.41905e-07	1.10713e-07	1.86576e-07	1.03115e-07	1.1679e-07	1.1245e-07	9.0942e-08	9.39853e-08
1690.75	8.546	4.20999e-08	3.04523e-08	2.28618e-08	7.09679e-08	6.42305e-08	2.16807e-08	0	6.70268e-08	7.96162e-09	0	4.15635e-08	7.45616e-08	3.7759e-08	3.11876e-08	3.28191e-08	9.81265e-09	2.47366e-08
1699.16	8.546	1.19919e-08	0	8.1199e-09	0	2.53442e-08	0	5.84409e-09	2.01082e-08	0	0	0	1.24277e-08	0	6.01386e-09	-8.40968e-09	-1.00187e-08	-3.6759e-09
1707.58	8.546	4.37432e-08	3.19736e-08	0	0	2.92346e-08	3.64498e-08	4.29387e-08	1.18684e-08	8.28979e-08	2.20028e-08	1.67633e-08	5.82119e-24	2.28873e-08	6.32981e-09	1.22493e-08	6.18726e-09	1.01592e-08
1716	8.546	4.31599e-24	0	0	0	1.12862e-08	9.80877e-09	1.62525e-08	0	0	1.91083e-08	0	8.95581e-24	-2.9669e-24	5.93494e-09	-2.301e-10	-7.80127e-09	-4.65977e-08
1724.41	8.546	0	0	-1.82408e-24	8.39049e-09	0	3.58127e-08	1.81229e-08	8.78767e-09	0	0	0	0	3.54363e-09	3.69357e-09	1.07312e-08	7.87215e-10	0
1732.83	8.546	0	1.14498e-08	0	0	0	0	0	0	0	0	0	0	0	8.59055e-09	-8.60967e-09	4.16292e-09	0
1741.25	8.546	0	0	0	0	0	3.3117e-08	3.39957e-08	0	0	0	0	0	-2.56262e-09	3.6606e-09	9.24872e-09	0	0
1749.66	8.546	3.8065e-08	3.57501e-08	8.17989e-09	0	2.11724e-08	1.54604e-08	1.7344e-08	0	2.26828e-08	2.39462e-08	2.27483e-08	1.33412e-08	0	1.13169e-08	1.21169e-08	6.79667e-09	9.61513e-09
1758.08	8.546	2.56153e-07	1.49007e-07	1.49177e-07	6.6875e-08	1.32466e-07	1.70197e-07	1.85024e-07	1.07396e-07	1.21659e-07	1.3742e-07	7.36421e-08	1.41743e-07	7.95808e-08	1.25499e-07	1.04891e-07	9.27045e-08	5.90219e-08
1766.5	8.546	1.18974e-07	1.00124e-07	3.79282e-08	7.1561e-08	1.7194e-07	6.9363e-08	4.56167e-08	1.00605e-07	1.32867e-07	3.04528e-08	5.15674e-09	5.52672e-08	6.8527e-08	3.7853e-08	4.59087e-08	1.4362e-08	2.36043e-08
1774.91	8.546	1.38888e-08	1.46892e-08	2.34731e-08	6.03541e-08	0	1.96066e-08	0	0	0	0	2.95426e-08	3.27131e-09	1.03468e-08	1.00761e-08	6.91418e-09	2.00035e-08	2.23388e-08
1783.33	8.546	1.02098e-07	2.38429e-08	7.10529e-08	1.12776e-07	1.06437e-07	3.06546e-08	3.35951e-08	4.43885e-08	4.0933e-08	7.66875e-08	1.88882e-08	5.16826e-08	5.49905e-08	5.22188e-08	2.80014e-08	1.45989e-08	3.79083e-08
1791.75	8.546	1.43471e-07	6.35763e-08	1.55397e-07	1.37582e-07	1.41369e-07	1.61047e-07	6.22009e-08	1.24506e-07	1.2154e-07	1.24136e-07	1.01448e-07	9.53708e-08	7.34348e-08	5.68376e-08	3.50887e-08	8.21005e-08	2.11123e-08
1800.16	8.546	9.28975e-08	4.89862e-08	3.21065e-08	6.90018e-08	5.9596e-08	4.01091e-08	1.21836e-08	2.38667e-08	6.98014e-08	3.2084e-08	1.17774e-08	3.24091e-08	2.36424e-08	2.47232e-08	2.92407e-08	1.68431e-24	9.06496e-09
1808.58	8.546	5.37708e-08	3.42631e-08	3.96862e-10	6.47065e-09	0	6.16077e-08	0	6.16045e-09	0	1.30504e-08	1.06124e-08	2.64761e-09	2.2181e-08	2.63511e-08	1.87259e-08	1.80575e-08	9.68729e-09
1817	8.546	9.34927e-08	0	7.07756e-10	0	2.10239e-08	0	0	0	5.0109e-09	5.43981e-09	0	5.96826e-09	-3.77865e-09	0	0	0	0
1825.41	8.546	0	0	0	1.95226e-08	0	0	0	0	0	0	0	2.11219e-08	0	0	0	0	0
1833.83	8.546	0	0	0	0	0	0	0	0	0	0	0	0	0	0	0	0	0
1842.25	8.546	0	0	0	0	0	0	0	0	0	0	0	0	0	0	0	0	0
1850.66	8.546	0	0	0	0	0	0	0	0	0	0	0	0	0	0	0	0	0
1859.08	8.546	0	0	0	0	0	0	0	0	0	0	0	0	0	0	0	0	0
1867.5	8.546	2.37749e-08	5.93217e-08	1.02992e-07	1.40291e-07	1.02916e-07	1.04151e-07	5.77993e-08	1.03805e-07	1.24542e-07	1.76733e-07	8.98366e-08	1.3876e-07	8.33103e-08	1.37707e-07	1.53323e-07	7.35251e-08	8.92511e-08
1875.91	8.546	2.01504e-05	1.21002e-05	1.20268e-05	1.19415e-05	1.19764e-05	1.19814e-05	1.18575e-05	1.17741e-05	1.18197e-05	1.17934e-05	1.16632e-05	1.1475e-05	1.13174e-05	1.10706e-05	1.04081e-05	9.55087e-06	8.94682e-06
1884.33	8.546	4.46938e-05	3.19218e-05	3.18995e-05	3.18053e-05	3.17786e-05	3.17172e-05	3.16491e-05	3.15195e-05	3.13007e-05	3.12106e-05	3.0851e-05	3.04505e-05	2.9907e-05	2.9088e-05	2.72975e-05	2.49856e-05	2.28901e-05
1892.75	8.546	5.2287e-06	3.5581e-06	3.62261e-06	3.66535e-06	3.61435e-06	3.6178e-06	3.59247e-06	3.55913e-06	3.55449e-06	3.61079e-06	3.51384e-06	3.45834e-06	3.40479e-06	3.32634e-06	3.07982e-06	2.80995e-06	2.5177e-06
1901.16	8.546	1.33051e-06	5.91845e-07	6.0276e-07	5.4015e-07	5.15889e-07	5.07692e-07	6.54484e-07	6.05225e-07	5.71487e-07	6.6961e-07	5.79201e-07	5.02943e-07	5.74808e-07	3.71074e-07	6.69089e-07	5.05754e-07	3.24587e-07
1909.58	8.546	1.01894e-06	3.97224e-07	4.89223e-07	6.21298e-07	5.18101e-07	5.24674e-07	4.60901e-07	5.64342e-07	4.9649e-07	4.43869e-07	4.52533e-07	4.17944e-07	5.43387e-07	4.51712e-07	4.79586e-07	2.92937e-07	3.95464e-07
1918	8.546	5.58926e-07	2.98165e-07	2.59699e-07	2.08699e-07	3.77108e-07	2.74153e-07	2.69171e-07	2.34749e-07	2.5815e-07	3.03092e-07	2.31015e-07	2.17612e-07	2.05345e-07	2.3741e-07	2.12907e-07	7.47632e-08	1.0119e-07
1926.41	8.546	4.72074e-07	2.36403e-07	2.44154e-07	2.2645e-07	2.96906e-07	2.71817e-07	2.09131e-07	2.35844e-07	2.57495e-07	2.49191e-07	1.45237e-07	2.42932e-07	2.71125e-07	1.72884e-07	1.73286e-07	1.47926e-07	4.23277e-08
1934.83	8.546	6.05853e-06	3.44583e-06	3.4276e-06	3.36973e-06	3.39487e-06	3.34089e-06	3.28564e-06	3.27525e-06	3.17182e-06	3.13821e-06	2.98398e-06	2.92828e-06	2.78896e-06	2.53274e-06	2.18436e-06	1.71646e-06	1.31287e-06
1943.25	8.546	0.000283844	0.000180366	0.000179025	0.000177615	0.000176261	0.000174878	0.000173456	0.000170642	0.000167766	0.000164825	0.000158903	0.000152829	0.00014662	0.000136886	0.000118291	9.83145e-05	8.21563e-05
1951.66	8.546	0.00105881	0.00075307	0.000748527	0.000743937	0.000739269	0.000734631	0.000729939	0.000720386	0.000710699	0.000700781	0.00068047	0.000659297	0.000637656	0.000602629	0.000534175	0.000456755	0.000392116
1960.08	8.546	0.00112374	0.000849625	0.000845271	0.000840782	0.000836273	0.000831748	0.000827151	0.000817817	0.000808292	0.000798574	0.000778325	0.000757063	0.000735039	0.000698863	0.000626314	0.000541843	0.000469963
1968.5	8.546	0.000875734	0.000665667	0.000661258	0.000656991	0.000652551	0.000648145	0.000643754	0.000634855	0.000625914	0.00061685	0.000598385	0.000579475	0.00056051	0.000530016	0.000470379	0.000402756	0.000344006
1976.91	8.546	0.000222095	0.000171574	0.000170433	0.000169278	0.000168155	0.000166951	0.000165711	0.000163469	0.000161022	0.000158609	0.000153736	0.000148756	0.000143812	0.000135929	0.00012042	0.000103025	8.74114e-05
1985.33	8.546	3.75031e-05	2.91403e-05	2.89565e-05	2.87447e-05	2.85908e-05	2.842e-05	2.80826e-05	2.76939e-05	2.7301e-05	2.69035e-05	2.60442e-05	2.52361e-05	2.43762e-05	2.30721e-05	2.05404e-05	1.75754e-05	1.50143e-05
1993.75	8.546	0.000182665	0.000145254	0.000144375	0.000143344	0.000142348	0.000141564	0.000140665	0.000138758	0.000136916	0.000135007	0.000131159	0.000127185	0.000123279	0.000116862	0.000104116	8.94144e-05	7.60142e-05
2002.16	8.546	0.00260994	0.00189719	0.00188562	0.00187388	0.00186212	0.0018501	0.00183804	0.00181367	0.00178882	0.00176343	0.00171118	0.00165634	0.00159936	0.00150666	0.00132414	0.00111618	0.000950945
2010.58	8.546	0.00274801	0.00199792	0.00198448	0.00197099	0.00195736	0.0019437	0.00192988	0.00190215	0.00187393	0.0018453	0.00178676	0.00172613	0.00166403	0.00156359	0.00136743	0.00114635	0.000968414
2019	8.546	0.00182319	0.0013487	0.00133945	0.00133015	0.0013208	0.00131147	0.00130207	0.00128311	0.00126396	0.00124462	0.00120508	0.00116438	0.00112312	0.00105664	0.000926614	0.000779217	0.000656606
2027.41	8.546	0.000531561	0.000403278	0.000400238	0.000397126	0.000394018	0.000390908	0.000387806	0.000381584	0.00037538	0.000369105	0.000356537	0.00034376	0.000331235	0.000311214	0.000272365	0.000228859	0.000190297
2035.83	8.546	0.000269058	0.00021539	0.000214062	0.000212615	0.000211323	0.000209834	0.000208469	0.000205698	0.00020289	0.000200084	0.000194426	0.00018862	0.000182901	0.000173696	0.000155383	0.000134145	0.000114573
2044.25	8.546	0.000364884	0.000295921	0.000294159	0.000292401	0.000290671	0.000288959	0.000287163	0.000283629	0.000280045	0.000276448	0.000269161	0.000261631	0.000254207	0.000242204	0.000217972	0.000189426	0.00016299
2052.66	8.546	0.00104766	0.000820745	0.000815565	0.00081029	0.000805069	0.000799758	0.000794462	0.000783831	0.000773093	0.000762267	0.000740204	0.000717559	0.000694931	0.000658356	0.000585178	0.00049993	0.000424735
2061.08	8.546	0.000719754	0.000579603	0.000576175	0.000572746	0.000569331	0.000565932	0.000562467	0.000555547	0.000548596	0.000541507	0.000527098	0.000512268	0.000497455	0.000473387	0.000424575	0.000366579	0.000314023
2069.49	8.546	0.000777269	0.000605848	0.000601725	0.000597696	0.00059356	0.000589461	0.000585332	0.000577042	0.000568747	0.000560345	0.000543398	0.000526052	0.00050884	0.00048121	0.000426297	0.000362539	0.000305863
2077.91	8.546	0.000419908	0.000332856	0.000330744	0.000328538	0.000326278	0.000324067	0.000321828	0.000317394	0.000312898	0.000308372	0.000299253	0.000289885	0.000280667	0.000265754	0.000236122	0.000201478	0.000169835
2086.33	8.546	0.000304796	0.000237845	0.000236102	0.000234342	0.000232623	0.000230896	0.000229183	0.000225726	0.000222249	0.000218761	0.000211738	0.000204595	0.000197635	0.000186481	0.000164428	0.000139161	0.000116021
2094.74	8.546	0.000124221	9.618e-05	9.54221e-05	9.46621e-05	9.39314e-05	9.31973e-05	9.24922e-05	9.09882e-05	8.95519e-05	8.8069e-05	8.5119e-05	8.21731e-05	7.92443e-05	7.4648e-05	6.56316e-05	5.54154e-05	4.60815e-05
2103.16	8.546	4.36274e-05	3.48602e-05	3.46007e-05	3.43615e-05	3.40635e-05	3.38193e-05	3.35955e-05	3.31432e-05	3.26553e-05	3.21858e-05	3.12434e-05	3.02819e-05	2.93583e-05	2.77859e-05	2.48206e-05	2.13216e-05	1.78774e-05
2111.58	8.546	2.97763e-05	2.45596e-05	2.44083e-05	2.42016e-05	2.4132e-05	2.39905e-05	2.38457e-05	2.35656e-05	2.32871e-05	2.29939e-05	2.24164e-05	2.18079e-05	2.11968e-05	2.02383e-05	1.82701e-05	1.59279e-05	1.36672e-05
2119.99	8.546	9.66392e-06	7.50593e-06	7.49712e-06	7.5386e-06	7.47265e-06	7.4238e-06	7.36254e-06	7.2528e-06	7.14752e-06	7.03999e-06	6.81798e-06	6.57698e-06	6.3765e-06	6.04967e-06	5.35182e-06	4.58056e-06	3.89291e-06
2128.41	8.546	2.60141e-06	1.94212e-06	2.09779e-06	1.95786e-06	1.97683e-06	1.95176e-06	1.96027e-06	1.9124e-06	1.8939e-06	1.85916e-06	1.81065e-06	1.80803e-06	1.72357e-06	1.64552e-06	1.4132e-06	1.14215e-06	1.06895e-06
2136.83	8.546	1.72696e-06	1.4848e-06	1.37976e-06	1.34665e-06	1.37193e-06	1.36529e-06	1.3508e-06	1.33729e-06	1.33229e-06	1.30295e-06	1.24831e-06	1.20468e-06	1.18041e-06	1.09035e-06	9.75986e-07	8.18942e-07	8.35382e-07
2145.24	8.546	9.09356e-06	7.43926e-06	7.2988e-06	7.3039e-06	7.25536e-06	7.20513e-06	7.17288e-06	7.06614e-06	6.9787e-06	6.89149e-06	6.71889e-06	6.54431e-06	6.36906e-06	6.12209e-06	5.55195e-06	4.85695e-06	4.07704e-06
2153.66	8.546	1.29364e-05	1.10963e-05	1.09319e-05	1.08677e-05	1.08356e-05	1.07748e-05	1.07127e-05	1.06122e-05	1.05046e-05	1.03987e-05	1.0202e-05	9.99097e-06	9.77383e-06	9.40184e-06	8.61278e-06	7.62108e-06	6.61551e-06
2162.08	8.546	1.40483e-05	1.17537e-05	1.17033e-05	1.16191e-05	1.15615e-05	1.14953e-05	1.14335e-05	1.13084e-05	1.1186e-05	1.10447e-05	1.07878e-05	1.05277e-05	1.02354e-05	9.81731e-06	8.93943e-06	7.7749e-06	6.74221e-06
2170.49	8.546	6.50133e-06	5.26406e-06	5.24073e-06	5.21634e-06	5.19122e-06	5.14511e-06	5.10249e-06	5.03229e-06	4.9746e-06	4.91464e-06	4.79805e-06	4.65024e-06	4.51193e-06	4.28848e-06	3.85183e-06	3.37481e-06	2.84566e-06
2178.91	8.546	1.30808e-06	1.01298e-06	1.01828e-06	9.98457e-07	1.00572e-06	9.78793e-07	9.83231e-07	9.54324e-07	9.59088e-07	9.2837e-07	8.99021e-07	8.80487e-07	8.93155e-07	7.96388e-07	7.50067e-07	5.98292e-07	5.09051e-07
2187.33	8.546	9.20742e-07	7.43757e-07	7.4929e-07	7.41236e-07	7.41051e-07	7.32379e-07	7.28909e-07	7.2552e-07	6.86024e-07	6.9643e-07	6.74671e-07	6.84498e-07	6.39483e-07	6.22527e-07	5.59847e-07	3.51736e-07	3.95427e-07
2195.74	8.546	3.61192e-07	3.16031e-07	2.89908e-07	2.84871e-07	2.93223e-07	3.08457e-07	3.00334e-07	2.99953e-07	2.6324e-07	2.49323e-07	2.46288e-07	2.63032e-07	2.50795e-07	2.32401e-07	1.88206e-07	1.38237e-07	1.23045e-07
2204.16	8.546	9.21243e-08	8.0155e-08	6.43872e-08	2.31276e-08	2.76724e-08	5.46702e-08	4.00966e-08	5.83098e-08	5.8441e-08	4.93843e-08	5.68716e-08	4.10467e-08	3.51118e-08	1.9578e-08	1.1001e-07	5.82311e-08	2.12242e-08
2212.58	8.546	3.56778e-07	2.74355e-07	2.80011e-07	2.73262e-07	2.68169e-07	2.71668e-07	2.73527e-07	2.62211e-07	2.44765e-07	2.44158e-07	2.64544e-07	2.70875e-07	2.42348e-07	1.95419e-07	1.98019e-07	1.04737e-07	1.91131e-07
2220.99	8.546	2.20065e-07	1.66105e-07	1.63552e-07	1.6573e-07	1.7645e-07	1.52222e-07	1.61982e-07	1.68928e-07	1.42699e-07	1.43012e-07	1.1453e-07	1.75153e-07	1.85789e-07	1.1713e-07	4.66027e-08	8.19383e-08	7.63259e-08
2229.41	8.546	1.25434e-07	1.17211e-07	1.15067e-07	1.08113e-07	1.30472e-07	9.78302e-08	1.33304e-07	1.11182e-07	7.56486e-08	1.09965e-07	9.16207e-08	1.20465e-07	5.64048e-08	1.04374e-07	8.22612e-08	7.62796e-08	7.06677e-08
2237.83	8.546	1.84359e-08	3.84363e-08	2.59839e-08	2.1221e-08	4.43378e-08	2.53103e-08	2.91826e-08	3.86463e-08	1.87332e-08	3.86594e-08	1.56401e-08	4.28524e-08	4.09045e-09	1.06366e-08	3.71533e-08	0	2.56267e-08
2246.24	8.546	7.03393e-08	5.04486e-08	8.75992e-08	5.90063e-08	6.83339e-08	8.46101e-08	4.27114e-08	7.70142e-08	7.31249e-08	8.5318e-08	9.2007e-08	5.54942e-08	3.16708e-08	3.26591e-08	6.49082e-08	8.84102e-08	1.19634e-08
2254.66	8.546	2.06936e-07	1.76883e-07	1.8839e-07	1.631e-07	1.84237e-07	1.87022e-07	1.82534e-07	1.71191e-07	1.50027e-07	1.51062e-07	1.73521e-07	1.54323e-07	1.53754e-07	9.11428e-08	1.04327e-07	8.94257e-08	9.17784e-08
2263.08	8.546	4.72916e-08	7.14743e-08	7.19577e-08	8.34757e-08	6.49538e-08	6.7841e-08	1.01806e-07	6.79465e-08	8.57879e-08	9.68716e-08	3.33859e-08	2.05662e-08	1.06548e-07	3.19042e-08	0	4.23275e-08	6.46945e-08
2271.49	8.546	2.82691e-08	7.40989e-08	4.60656e-08	5.53685e-08	3.90542e-08	3.20826e-08	2.91171e-08	3.60816e-08	6.27059e-08	6.81063e-08	6.89021e-09	6.7399e-08	1.47329e-07	7.28651e-08	8.89656e-08	1.12824e-07	3.04293e-08
2279.91	8.546	9.82754e-08	4.94287e-08	2.58691e-08	6.99431e-08	3.456e-08	3.08366e-08	8.77592e-08	5.75387e-08	3.11499e-08	2.93078e-08	6.4327e-08	6.05188e-08	3.67903e-08	6.9845e-08	0	-2.59668e-08	5.14548e-08
2288.33	8.546	0	1.91515e-08	7.86368e-09	2.87512e-08	1.05766e-08	1.14897e-08	2.5952e-08	7.02253e-09	0	2.21649e-09	0	2.08136e-08	3.11298e-08	0	0	-1.86514e-08	-7.64693e-09
2296.74	8.546	0	7.14381e-09	1.62434e-23	1.14412e-08	9.11802e-09	9.40728e-09	2.5129e-08	1.96401e-08	1.10845e-08	0	2.23373e-08	0	2.23902e-08	0	0	0	0
2305.16	8.546	0	4.49539e-09	0	2.99439e-24	0	9.81138e-09	1.59645e-08	-3.14533e-09	3.80288e-09	0	1.60878e-08	0	2.74089e-08	0	0	0	1.47213e-08
2313.58	8.546	0	0	0	1.29007e-08	0	3.49356e-24	0	8.07605e-09	0	0	1.93325e-09	0	0	0	0	0	0
2321.99	8.546	0	0	0	0	0	1.48279e-08	0	0	0	9.88584e-09	-7.4842e-09	0	9.76789e-09	0	0	0	1.19712e-08
2330.41	8.546	0	0	0	6.91623e-09	0	0	0	0	0	0	0	0	0	0	0	0	0
2338.83	8.546	0	0	7.15093e-09	0	0	0	0	0	0	1.89233e-08	-1.54686e-08	0	0	0	0	-9.83318e-09	0
2347.24	8.546	0	0	0	0	0	0	0	0	0	0	0	0	0	0	0	1.1382e-08	0
2355.66	8.546	0	-3.2776e-09	4.54983e-09	0	0	0	0	0	0	0	0	2.04951e-08	0	0	0	9.25595e-10	0
2364.08	8.546	0	0	1.64381e-09	1.25939e-08	-1.34024e-08	0	0	0	1.60424e-08	0	1.88021e-08	2.60517e-08	0	0	0	8.86932e-09	0
2372.49	8.546	0	0	0	-2.16559e-24	-6.21906e-09	4.30493e-08	1.77026e-08	0	0	0	0	0	0	0	0	0	0
2380.91	8.546	0	0	0	0	0	4.07297e-09	0	0	0	-1.49869e-08	0	0	0	0	0	5.50265e-09	0
2389.33	8.546	0	0	-8.06861e-09	0	0	0	0	0	2.65514e-08	-2.15338e-08	-1.5691e-08	0	0	0	0	1.49725e-08	1.43911e-08
2397.74	8.546	0	0	-7.71344e-09	0	0	0	0	0	2.9197e-08	-1.32859e-08	-1.50825e-08	0	0	0	3.32957e-08	1.38302e-08	0
2406.16	8.546	0	0	0	1.01167e-08	8.16532e-09	0	0	0	0	0	0	0	2.52905e-08	0	0	-8.00525e-09	0
2414.58	8.546	0	1.53057e-08	-5.93851e-09	0	0	0	9.35524e-09	0	0	0	0	0	0	0	0	-6.82361e-09	0
2422.99	8.546	0	0	0	1.21686e-08	-1.92561e-09	0	1.26624e-08	0	0	0	0	0	0	0	0	0	0
2431.41	8.546	0	6.52965e-09	0	1.16125e-08	0	0	0	0	0	1.79784e-08	-6.22885e-09	0	0	0	4.12583e-09	-4.14911e-09	0
2439.83	8.546	1.54312e-08	-8.40166e-25	8.519e-09	0	8.7233e-24	0	9.52888e-09	5.00697e-09	2.82607e-08	0	2.90478e-08	3.13796e-09	0	2.14748e-08	4.22651e-09	-5.26724e-09	0
2448.24	8.546	2.75115e-09	-1.26837e-24	0	0	0	0	0	0	0	0	0	0	5.75476e-08	0	0	0	1.75252e-08
2456.66	8.546	4.04347e-08	5.71716e-09	0	0	0	0	0	1.53248e-08	0	1.86834e-08	0	0	6.09444e-08	1.70991e-08	0	-1.67064e-08	0
2465.08	8.546	3.4476e-08	1.75384e-08	0	6.32613e-09	2.31999e-08	1.98475e-08	6.08986e-24	6.38667e-08	4.75189e-24	6.11726e-24	6.41039e-08	0	0	0	0	2.68083e-08	-5.80947e-09
2473.49	8.546	1.82984e-07	8.64579e-08	8.23244e-09	3.16378e-08	0	6.68065e-08	9.18297e-08	3.07724e-08	8.87197e-08	1.85658e-08	0	4.42288e-08	8.69602e-08	6.28905e-08	0	2.96373e-25	3.92338e-08
2481.91	8.546	1.9898e-06	1.44434e-06	1.41077e-06	1.44794e-06	1.4307e-06	1.39634e-06	1.40492e-06	1.29636e-06	1.3461e-06	1.30277e-06	1.18145e-06	1.19379e-06	1.16859e-06	1.13121e-06	9.01727e-07	7.93274e-07	5.85636e-07
2490.33	8.546	3.68924e-06	2.5802e-06	2.534e-06	2.51374e-06	2.3925e-06	2.46506e-06	2.45976e-06	2.36452e-06	2.4142e-06	2.27547e-06	2.24457e-06	2.19034e-06	2.04204e-06	2.13773e-06	1.73827e-06	1.447e-06	1.22048e-06
2498.74	8.546	1.82972e-06	1.48562e-06	1.51638e-06	1.44029e-06	1.44941e-06	1.4785e-06	1.39437e-06	1.42552e-06	1.41085e-06	1.38426e-06	1.31604e-06	1.33038e-06	1.28203e-06	1.20959e-06	1.11583e-06	8.91239e-07	7.0408e-07
2507.16	8.546	9.42189e-07	7.62354e-07	7.10309e-07	7.04176e-07	7.17032e-07	7.42326e-07	7.05117e-07	6.94704e-07	7.08798e-07	7.5989e-07	6.65792e-07	6.5529e-07	6.51448e-07	5.70508e-07	5.22694e-07	4.55192e-07	4.0484e-07
2515.58	8.546	1.99428e-06	1.07032e-06	1.13443e-06	1.21552e-06	1.06084e-06	1.12373e-06	1.14546e-06	1.04234e-06	1.05954e-06	1.03839e-06	9.66541e-07	1.08261e-06	9.06232e-07	9.73469e-07	8.6344e-07	6.6691e-07	5.88823e-07

## Sheet: k_GF5A
Wavelength	FWHM	k_Summer_L	k_Summer_M	k_Summer_H	k_Winter_L	k_Winter_M	k_Winter_H	k_1976_L	k_1976_M	k_1976_H
1014.15	8.25	0	0	0	0	0	0	0	0	0	0	0	0	0	0	0	0	0
1022.56	8.25	0	0	0	0	0	0	0	0	0	0	0	0	0	0	0	0	0
1030.98	8.25	0	0	0	0	0	0	0	0	0	0	0	0	0	0	0	0	0
1039.4	8.25	6.29502e-07	4.72958e-07	4.75459e-07	4.84837e-07	4.70539e-07	4.62142e-07	4.60289e-07	4.45008e-07	4.43899e-07	4.32303e-07	4.31473e-07	4.15547e-07	3.88511e-07	3.8368e-07	3.40093e-07	3.09392e-07	3.23945e-07
1047.81	8.25	9.40453e-07	7.2434e-07	7.22289e-07	7.1738e-07	7.15343e-07	7.11817e-07	6.95058e-07	6.89492e-07	6.86052e-07	6.78121e-07	6.61043e-07	6.45909e-07	6.19067e-07	5.86298e-07	5.64213e-07	4.75932e-07	4.20074e-07
1056.23	8.25	5.02397e-07	3.66055e-07	3.5611e-07	3.67413e-07	3.68132e-07	3.63508e-07	3.4846e-07	3.65358e-07	3.80978e-07	3.52365e-07	3.49311e-07	3.29371e-07	3.09558e-07	2.76467e-07	2.32614e-07	2.36152e-07	2.13444e-07
1064.65	8.25	3.23059e-07	2.45582e-07	2.44473e-07	2.31756e-07	2.27006e-07	2.46226e-07	2.39216e-07	2.24916e-07	2.17926e-07	2.24304e-07	2.10649e-07	2.1427e-07	2.11404e-07	1.76661e-07	2.01468e-07	1.65114e-07	1.35704e-07
1073.06	8.25	3.54178e-08	3.75686e-08	4.29989e-08	4.72244e-08	2.47381e-08	3.69054e-08	2.41817e-08	4.85122e-08	3.6e-08	3.91575e-08	5.12015e-08	3.83512e-08	1.3255e-08	1.16936e-08	1.91996e-08	1.46007e-08	3.89341e-08
1081.48	8.25	1.16197e-08	5.71134e-25	-8.98508e-26	3.22592e-09	4.39199e-09	4.61176e-09	2.38756e-09	7.37811e-09	0	5.39657e-09	6.2001e-09	1.16069e-08	0	0	2.84407e-09	-1.28901e-08	-1.21842e-08
1089.9	8.25	0	3.08458e-09	0	0	0	0	0	4.66283e-09	0	-8.94048e-10	0	0	0	0	0	0	0
1098.31	8.25	0	0	0	0	0	-1.5244e-09	2.52032e-09	6.96485e-09	0	4.99742e-09	0	0	0	0	0	0	0
1106.73	8.25	0	0	0	0	0	0	0	0	0	0	0	0	0	0	0	0	0
1115.15	8.25	0	0	0	0	2.10876e-24	0	3.58612e-09	0	5.70093e-10	-2.99568e-09	0	0	0	0	7.26593e-09	0	7.06154e-09
1123.56	8.25	0	0	0	0	0	0	0	0	0	0	0	0	0	0	0	0	0
1131.98	8.25	0	0	0	2.44504e-09	0	0	0	7.7668e-09	0	0	1.00146e-08	0	2.1691e-24	0	0	0	8.38369e-10
1140.4	8.25	0	0	0	0	0	0	0	0	0	0	0	0	0	0	0	0	0
1148.81	8.25	0	3.98579e-09	0	0	0	0	0	0	0	0	0	0	0	0	0	0	0
1157.23	8.25	0	0	0	0	0	0	0	0	0	0	0	0	0	0	0	0	0
1165.65	8.25	0	0	0	0	-5.98545e-09	0	0	0	0	0	0	4.48864e-09	0	0	0	0	0
1174.06	8.25	0	0	0	0	0	0	0	0	0	0	0	0	0	0	0	0	0
1182.48	8.25	0	0	0	0	0	0	0	0	0	0	0	0	0	0	0	0	0
1190.9	8.25	0	0	0	0	0	0	0	0	0	0	0	0	0	0	0	0	0
1199.31	8.25	5.98664e-07	4.55e-07	4.48603e-07	4.47575e-07	4.5057e-07	4.36055e-07	4.31237e-07	4.23203e-07	4.18765e-07	4.13712e-07	3.98559e-07	3.8301e-07	3.8085e-07	3.51433e-07	3.35798e-07	2.74914e-07	2.60505e-07
1207.73	8.25	3.73134e-05	2.96486e-05	2.94874e-05	2.93299e-05	2.91691e-05	2.90075e-05	2.88206e-05	2.84954e-05	2.81148e-05	2.77907e-05	2.70785e-05	2.63966e-05	2.56811e-05	2.46277e-05	2.26236e-05	2.06649e-05	1.87883e-05
1216.15	8.25	1.4665e-05	1.12859e-05	1.12078e-05	1.11201e-05	1.10425e-05	1.10015e-05	1.09236e-05	1.07851e-05	1.06033e-05	1.04796e-05	1.01878e-05	9.91546e-06	9.58693e-06	9.20771e-06	8.35353e-06	7.57725e-06	6.73827e-06
1224.56	8.25	1.6128e-05	1.25586e-05	1.24675e-05	1.23854e-05	1.22989e-05	1.22427e-05	1.21615e-05	1.19714e-05	1.18201e-05	1.17011e-05	1.13353e-05	1.10255e-05	1.06983e-05	1.02152e-05	9.34372e-06	8.4663e-06	7.66229e-06
1232.98	8.25	1.61692e-06	1.19645e-06	1.20956e-06	1.19283e-06	1.17334e-06	1.17167e-06	1.15397e-06	1.15313e-06	1.12646e-06	1.10513e-06	1.05556e-06	1.01279e-06	9.65424e-07	9.40418e-07	8.22381e-07	7.4394e-07	6.4137e-07
1241.4	8.25	3.7804e-07	2.72987e-07	2.3481e-07	2.65463e-07	2.87114e-07	2.6649e-07	3.05717e-07	2.76727e-07	2.52372e-07	2.54786e-07	2.3898e-07	2.56866e-07	2.33273e-07	2.39455e-07	1.81343e-07	1.68394e-07	1.65691e-07
1249.81	8.25	1.526e-07	1.05322e-07	1.26068e-07	1.19427e-07	1.24436e-07	1.21354e-07	1.28717e-07	1.3566e-07	1.39758e-07	9.49129e-08	1.04571e-07	1.17949e-07	1.15372e-07	1.35904e-07	1.44913e-07	1.61705e-07	9.18812e-08
1258.23	8.25	1.99454e-07	1.51308e-07	1.71654e-07	1.36176e-07	1.31708e-07	1.29016e-07	1.26738e-07	1.71753e-07	1.28516e-07	1.70161e-07	1.4146e-07	1.49139e-07	7.33072e-08	1.74874e-07	1.05575e-07	1.36149e-07	4.08242e-08
1266.65	8.25	2.10523e-07	1.64578e-07	1.66777e-07	1.83467e-07	1.38127e-07	1.49117e-07	1.60248e-07	1.44733e-07	1.75653e-07	1.48485e-07	1.16361e-07	1.38053e-07	1.61524e-07	1.60679e-07	6.3263e-08	4.06543e-08	1.18021e-07
1275.06	8.25	0	-7.18891e-09	5.90469e-09	1.53371e-09	1.13745e-24	3.93403e-09	6.03142e-09	0	0	0	0	0	0	0	0	0	-7.44053e-10
1283.48	8.25	5.68376e-08	3.26224e-08	4.38424e-08	4.34429e-08	3.09267e-08	3.83249e-08	5.66685e-08	3.38226e-08	4.91956e-08	4.51761e-08	4.34258e-08	5.56256e-08	2.38684e-08	3.57972e-08	-1.47416e-25	1.08647e-08	1.65106e-08
1291.9	8.25	2.37969e-06	1.90342e-06	1.90456e-06	1.82381e-06	1.84187e-06	1.86257e-06	1.83071e-06	1.82726e-06	1.79141e-06	1.79163e-06	1.7214e-06	1.68155e-06	1.63895e-06	1.54601e-06	1.45981e-06	1.30231e-06	1.15553e-06
1300.31	8.25	3.00219e-07	2.2814e-07	2.29754e-07	2.11854e-07	2.47688e-07	2.26469e-07	2.50501e-07	2.16773e-07	2.37293e-07	2.17775e-07	2.36046e-07	2.0799e-07	2.19049e-07	2.0853e-07	1.66263e-07	1.18215e-07	1.50046e-07
1308.73	8.25	1.56589e-07	1.12818e-07	8.83481e-08	1.01462e-07	1.28153e-07	1.24257e-07	9.07088e-08	9.8896e-08	9.94283e-08	9.8857e-08	8.83422e-08	9.83606e-08	8.20551e-08	8.5061e-08	7.01976e-08	6.39705e-08	4.92021e-08
1317.15	8.25	8.7236e-06	6.84687e-06	6.81729e-06	6.76069e-06	6.72085e-06	6.67123e-06	6.62253e-06	6.54478e-06	6.45504e-06	6.39038e-06	6.23912e-06	6.06175e-06	5.88026e-06	5.57976e-06	5.16778e-06	4.57994e-06	4.24e-06
1325.56	8.25	7.4788e-07	5.10392e-07	5.20671e-07	5.02305e-07	5.07712e-07	5.21618e-07	5.09628e-07	5.03777e-07	4.68971e-07	4.49973e-07	4.39918e-07	4.68778e-07	4.30804e-07	4.12347e-07	3.14832e-07	3.09303e-07	2.66393e-07
1333.98	8.25	1.06776e-06	8.12304e-07	8.36238e-07	7.96704e-07	8.28397e-07	7.82857e-07	7.45253e-07	7.91182e-07	7.91596e-07	7.29246e-07	7.26052e-07	6.74019e-07	6.60343e-07	6.92421e-07	6.70252e-07	5.55787e-07	4.8916e-07
1342.4	8.25	3.12179e-06	2.31587e-06	2.3226e-06	2.29956e-06	2.26822e-06	2.26845e-06	2.24584e-06	2.2252e-06	2.17667e-06	2.14132e-06	2.10706e-06	2.0513e-06	1.97369e-06	1.91491e-06	1.756e-06	1.58281e-06	1.40687e-06
1350.81	8.25	3.45792e-07	1.47868e-07	1.24492e-07	2.03708e-07	1.1754e-07	1.22976e-07	2.22567e-07	1.88411e-07	1.81315e-07	6.14712e-08	1.08438e-07	1.63533e-07	1.19343e-07	7.51923e-08	1.03585e-07	6.15287e-08	7.36752e-08
1359.23	8.25	3.02138e-08	1.62086e-08	2.07795e-08	1.09633e-08	1.62426e-08	2.49615e-08	1.03873e-08	1.22852e-08	5.43416e-09	1.42379e-08	7.34567e-09	3.75145e-08	1.80165e-08	7.49692e-09	2.22081e-08	8.24023e-09	0
1367.65	8.25	1.22805e-07	6.56088e-08	8.74895e-08	7.4762e-08	8.54581e-08	7.03444e-08	8.48952e-08	8.61776e-08	6.90426e-08	8.90977e-08	8.19284e-08	8.80749e-08	1.04484e-07	8.91259e-08	9.72719e-08	8.99765e-08	7.94438e-08
1376.06	8.25	2.08749e-07	2.06259e-07	1.10019e-07	1.02564e-07	8.83199e-08	1.7011e-07	8.89228e-08	2.34053e-07	1.20862e-07	1.08637e-07	1.42608e-07	6.99226e-08	6.27837e-08	9.40372e-08	1.21475e-07	1.03834e-07	1.10668e-07
1384.48	8.25	9.16534e-09	0	9.32789e-09	0	7.83268e-09	6.96514e-09	1.23246e-08	5.83434e-09	6.7163e-25	1.26101e-08	3.23781e-09	7.08126e-09	0	1.46732e-08	1.7529e-08	6.39048e-09	1.52122e-08
1392.9	8.25	0	0	2.38457e-09	2.541e-09	0	2.40126e-09	4.53282e-09	3.17983e-09	0	2.35247e-09	4.84298e-09	2.63223e-09	0	0	0	0	9.72122e-09
1401.31	8.25	0	0	2.31582e-08	0	0	6.37563e-25	-5.31163e-09	3.49785e-09	2.45997e-09	0	-1.25655e-24	0	3.82068e-09	0	7.55102e-09	0	3.11755e-09
1409.73	8.25	1.7975e-10	0	3.40128e-09	2.91935e-08	0	0	0	0	0	0	0	0	-2.04329e-08	0	0	0	0
1418.15	8.25	0	0	0	0	0	0	2.07408e-08	0	2.95532e-09	0	1.67031e-09	0	0	0	2.67755e-09	0	0
1426.56	8.25	2.22255e-06	8.74323e-07	8.95567e-07	8.75237e-07	8.66619e-07	8.30962e-07	8.23504e-07	7.6234e-07	7.54472e-07	7.15559e-07	6.77782e-07	6.50563e-07	5.75515e-07	5.35368e-07	3.76596e-07	3.35596e-07	2.38811e-07
1434.98	8.25	0.000331603	0.000248256	0.000247298	0.000246273	0.000245262	0.00024418	0.000243272	0.000241146	0.000239004	0.000236726	0.000232069	0.000227296	0.000222337	0.000214314	0.000199164	0.0001828	0.000167444
1443.4	8.25	0.000138008	9.35796e-05	9.30279e-05	9.24242e-05	9.18537e-05	9.11675e-05	9.06113e-05	8.94066e-05	8.82872e-05	8.699e-05	8.44315e-05	8.18753e-05	7.9362e-05	7.54047e-05	6.82722e-05	6.09637e-05	5.44628e-05
1451.81	8.25	1.15846e-05	7.37063e-06	7.27327e-06	7.18408e-06	7.16752e-06	7.14167e-06	7.0333e-06	6.84831e-06	6.75921e-06	6.58329e-06	6.33421e-06	6.00586e-06	5.8051e-06	5.42058e-06	4.75032e-06	4.08255e-06	3.52143e-06
1460.23	8.25	4.75534e-07	2.32483e-07	3.11656e-07	2.74754e-07	2.42858e-07	2.46023e-07	2.78257e-07	2.22033e-07	2.18888e-07	2.20223e-07	2.47614e-07	2.67295e-07	1.9636e-07	1.15911e-07	2.12131e-07	1.21733e-07	9.9722e-08
1468.65	8.25	3.95276e-06	3.0747e-06	3.07488e-06	3.11789e-06	3.07828e-06	3.03439e-06	3.04637e-06	2.98862e-06	3.00201e-06	2.94435e-06	2.88954e-06	2.8452e-06	2.74844e-06	2.65528e-06	2.46063e-06	2.23646e-06	2.03704e-06
1477.06	8.25	9.83074e-06	7.82377e-06	7.79531e-06	7.75843e-06	7.7197e-06	7.68543e-06	7.67695e-06	7.56592e-06	7.51287e-06	7.41463e-06	7.24181e-06	7.12745e-06	6.96919e-06	6.62569e-06	6.15337e-06	5.6876e-06	5.17352e-06
1485.48	8.25	1.82271e-06	1.27139e-06	1.35131e-06	1.2638e-06	1.23025e-06	1.27411e-06	1.28875e-06	1.19522e-06	1.21016e-06	1.2077e-06	1.18728e-06	1.1633e-06	1.00932e-06	1.03743e-06	9.46449e-07	8.24957e-07	7.48071e-07
1493.9	8.25	3.18739e-06	2.46052e-06	2.4031e-06	2.42577e-06	2.37761e-06	2.32975e-06	2.37476e-06	2.34285e-06	2.34085e-06	2.22972e-06	2.16199e-06	2.11999e-06	1.99436e-06	1.94359e-06	1.80742e-06	1.59537e-06	1.43512e-06
1502.31	8.25	5.86667e-07	4.88916e-07	4.34344e-07	4.53271e-07	4.35358e-07	4.67813e-07	5.10449e-07	4.14899e-07	4.51804e-07	4.07425e-07	4.04483e-07	4.55482e-07	4.03992e-07	3.79448e-07	3.87111e-07	3.0666e-07	2.93569e-07
1510.73	8.25	2.22046e-08	7.0672e-09	1.84549e-08	2.74271e-08	3.00373e-08	1.92252e-08	0	1.16515e-08	1.22268e-08	8.72183e-09	1.47509e-08	0	5.57093e-24	1.13702e-08	-1.02935e-09	7.29596e-09	-1.68031e-09
1519.15	8.25	1.08222e-07	1.24626e-07	4.63674e-08	5.34641e-08	7.59036e-08	5.33689e-08	1.13816e-07	8.50343e-08	1.98691e-08	6.78314e-08	9.18545e-08	2.01569e-08	6.75936e-08	8.20352e-08	5.96998e-09	3.1477e-08	3.7379e-08
1527.56	8.25	6.52453e-06	4.94262e-06	4.90389e-06	4.89794e-06	4.8486e-06	4.83826e-06	4.79272e-06	4.68421e-06	4.65025e-06	4.51203e-06	4.39641e-06	4.26092e-06	4.13333e-06	3.86714e-06	3.42992e-06	3.06453e-06	2.68671e-06
1535.98	8.25	3.83221e-05	3.08419e-05	3.06373e-05	3.05365e-05	3.03126e-05	3.0126e-05	2.99595e-05	2.95982e-05	2.92104e-05	2.89224e-05	2.8101e-05	2.74322e-05	2.66171e-05	2.54454e-05	2.33376e-05	2.10917e-05	1.90141e-05
1544.4	8.25	1.70051e-05	1.34925e-05	1.33937e-05	1.33316e-05	1.32491e-05	1.31545e-05	1.30888e-05	1.29057e-05	1.27321e-05	1.25764e-05	1.22205e-05	1.18849e-05	1.15745e-05	1.09178e-05	9.97578e-06	8.97337e-06	8.02723e-06
1552.81	8.25	2.86216e-07	2.41022e-07	2.11452e-07	2.42795e-07	1.59576e-07	2.08445e-07	2.38306e-07	1.42008e-07	2.04953e-07	2.29643e-07	2.27473e-07	2.52732e-07	1.71721e-07	2.25177e-07	1.47268e-07	1.2289e-07	1.19918e-07
1561.23	8.25	4.18519e-07	3.04587e-07	3.16581e-07	3.53765e-07	3.18499e-07	3.23249e-07	3.09454e-07	2.62712e-07	3.31137e-07	2.21266e-07	3.35505e-07	3.87637e-07	2.33054e-07	2.88077e-07	2.22496e-07	2.11261e-07	1.73451e-07
1569.65	8.25	0.000153032	0.000120225	0.000119454	0.000118688	0.000117904	0.00011714	0.000116362	0.000114848	0.000113253	0.000111696	0.000108576	0.000105339	0.00010211	9.73744e-05	8.8236e-05	7.8861e-05	7.02426e-05
1578.06	8.25	0.000169695	0.000135678	0.000134854	0.000134073	0.000133282	0.000132537	0.000131667	0.000130091	0.000128398	0.000126733	0.000123402	0.000119972	0.000116707	0.0001113	0.000101662	9.14016e-05	8.19152e-05
1586.48	8.25	2.2737e-05	1.73515e-05	1.72574e-05	1.71121e-05	1.69364e-05	1.68641e-05	1.67472e-05	1.64722e-05	1.62706e-05	1.59558e-05	1.54395e-05	1.49054e-05	1.44606e-05	1.34997e-05	1.21729e-05	1.06958e-05	9.3755e-06
1594.9	8.25	1.01934e-05	7.66106e-06	7.64306e-06	7.60742e-06	7.51159e-06	7.41173e-06	7.36292e-06	7.27158e-06	7.13763e-06	7.04261e-06	6.80848e-06	6.5402e-06	6.3356e-06	6.01988e-06	5.27247e-06	4.60802e-06	4.04422e-06
1603.31	8.25	0.000197956	0.000159036	0.000158167	0.000157222	0.000156301	0.000155422	0.000154433	0.000152569	0.000150707	0.00014881	0.000144964	0.000141	0.000137083	0.000130902	0.000119537	0.000107413	9.61966e-05
1611.73	8.25	0.000139119	0.000110298	0.000109608	0.000108972	0.000108284	0.000107525	0.000106848	0.000105452	0.000104042	0.00010259	9.97511e-05	9.69303e-05	9.40218e-05	8.95842e-05	8.12526e-05	7.25549e-05	6.45651e-05
1620.15	8.25	1.47524e-05	1.0734e-05	1.06431e-05	1.05295e-05	1.04288e-05	1.03883e-05	1.02516e-05	1.00549e-05	9.86238e-06	9.69565e-06	9.3527e-06	8.9291e-06	8.53181e-06	7.98688e-06	6.95587e-06	5.95249e-06	5.07161e-06
1628.56	8.25	4.07755e-06	3.25739e-06	3.2418e-06	3.18832e-06	3.2057e-06	3.14094e-06	3.14438e-06	3.14986e-06	3.05166e-06	3.04325e-06	2.91272e-06	2.80842e-06	2.74327e-06	2.71975e-06	2.38445e-06	2.10409e-06	1.84652e-06
1636.98	8.25	1.15472e-05	9.13211e-06	9.05323e-06	9.038e-06	8.97131e-06	8.86863e-06	8.79922e-06	8.74566e-06	8.61126e-06	8.53543e-06	8.29159e-06	7.9622e-06	7.68738e-06	7.46641e-06	6.62586e-06	5.86501e-06	5.20053e-06
1645.4	8.25	3.31178e-05	2.71871e-05	2.70281e-05	2.68684e-05	2.67204e-05	2.6579e-05	2.64727e-05	2.61063e-05	2.57879e-05	2.5562e-05	2.49961e-05	2.43064e-05	2.36183e-05	2.27209e-05	2.07673e-05	1.8709e-05	1.67979e-05
1653.81	8.25	1.50407e-05	1.18185e-05	1.17841e-05	1.16581e-05	1.15742e-05	1.1536e-05	1.14475e-05	1.12859e-05	1.11138e-05	1.09693e-05	1.0678e-05	1.04021e-05	1.00173e-05	9.38002e-06	8.57703e-06	7.56819e-06	6.68379e-06
1662.23	8.25	2.592e-06	1.95895e-06	2.01373e-06	1.97283e-06	1.95957e-06	1.97318e-06	1.95827e-06	1.88913e-06	1.85222e-06	1.86939e-06	1.78263e-06	1.67924e-06	1.64741e-06	1.58692e-06	1.3674e-06	1.22931e-06	1.06155e-06
1670.65	8.25	1.10893e-06	7.33718e-07	8.00109e-07	8.2708e-07	8.28319e-07	8.01406e-07	7.51732e-07	7.74157e-07	7.46138e-07	7.11765e-07	6.92886e-07	6.47818e-07	7.75146e-07	6.18781e-07	5.57872e-07	4.88339e-07	4.26639e-07
1679.06	8.25	2.68705e-07	2.41797e-07	1.94749e-07	1.3986e-07	1.19527e-07	3.01927e-07	1.66405e-07	2.50904e-07	2.16441e-07	2.83641e-07	1.35961e-07	2.30798e-07	7.70275e-08	1.65991e-07	1.40054e-07	1.42036e-07	1.24186e-07
1687.48	8.25	8.68539e-08	1.32451e-07	2.86887e-08	1.15825e-07	1.4065e-07	3.80164e-08	1.6562e-08	1.43667e-07	8.03024e-08	2.36773e-08	1.0073e-07	1.22614e-07	1.38045e-07	7.15052e-08	7.68144e-08	2.16318e-08	6.54563e-08
1695.9	8.25	1.52187e-08	0	1.93522e-08	0	2.50492e-08	4.99885e-09	0	2.0617e-08	3.75064e-08	0	0	1.56656e-23	0	3.48266e-09	2.35076e-09	8.62453e-09	-1.04015e-08
1704.31	8.25	2.85477e-08	3.13721e-08	4.10123e-09	0	3.00362e-08	6.85185e-09	3.35571e-08	0	3.34918e-08	3.24274e-08	0	1.79707e-08	1.39668e-08	2.81802e-09	2.77242e-09	-1.62912e-08	6.86062e-09
1712.73	8.25	2.45116e-08	1.09188e-08	0	0	1.9937e-23	3.98831e-08	4.54899e-08	1.12063e-08	6.11417e-08	0	1.11936e-08	1.03738e-23	-2.6754e-24	1.00575e-08	1.37182e-08	-2.60906e-09	-1.29195e-08
1721.15	8.25	0	0	-1.45837e-24	0	1.99143e-08	2.4168e-08	8.02246e-09	1.58929e-08	0	2.6376e-08	0	0	3.02558e-09	4.45974e-09	0	5.63743e-09	-1.44825e-08
1729.56	8.25	0	1.29553e-08	0	1.31969e-08	0	0	0	0	0	0	0	0	0	7.81633e-09	-9.46497e-09	6.42562e-09	0
1737.98	8.25	0	0	0	0	0	3.71092e-08	3.80873e-08	0	0	0	0	0	-1.76695e-09	1.05745e-08	1.1146e-08	0	0
1746.4	8.25	0	0	0	0	0	0	0	0	0	0	0	0	0	0	0	0	0
1754.81	8.25	2.63013e-07	1.63064e-07	1.97704e-07	8.13114e-08	1.41741e-07	1.7688e-07	1.59523e-07	1.10193e-07	1.13328e-07	1.22327e-07	7.98313e-08	1.95701e-07	9.66875e-08	1.25353e-07	1.18543e-07	9.60084e-08	6.17017e-08
1763.23	8.25	1.9215e-07	1.7917e-07	5.41863e-08	7.27883e-08	8.97679e-08	9.75503e-08	6.46793e-08	8.3827e-08	1.6325e-07	1.49751e-07	3.56152e-08	7.88194e-08	8.06995e-08	7.31454e-08	5.38051e-08	4.08047e-08	5.57752e-08
1771.65	8.25	4.90394e-08	0	3.51458e-08	2.81975e-08	7.87664e-08	0	1.76941e-08	0	1.40623e-08	0	4.11668e-08	9.71036e-09	2.90757e-08	1.92335e-08	2.11794e-08	2.21538e-08	3.59652e-09
1780.06	8.25	7.09576e-09	1.18967e-08	0	2.80555e-08	0	3.7954e-08	0	0	0	0	0	0	5.69078e-09	3.2378e-09	1.90561e-09	0	2.51873e-08
1788.48	8.25	2.48278e-07	5.91749e-08	1.96743e-07	2.4779e-07	2.97258e-07	1.97384e-07	7.33326e-08	1.71643e-07	1.249e-07	2.19866e-07	7.04514e-08	1.47526e-07	1.30193e-07	9.57679e-08	5.54579e-08	6.7411e-08	5.36102e-08
1796.9	8.25	1.15451e-07	2.62559e-08	1.04746e-07	8.10741e-08	7.06202e-08	7.38867e-08	5.63749e-08	7.15952e-08	1.26974e-07	3.97147e-08	3.27494e-08	6.02199e-08	4.13892e-08	5.69276e-08	4.11196e-08	2.01555e-08	2.2886e-08
1805.31	8.25	8.38517e-08	7.15491e-08	5.94411e-09	1.12057e-08	2.2879e-09	8.82111e-08	5.30623e-09	7.78564e-09	5.65656e-09	2.04155e-08	8.57703e-09	4.8912e-09	1.3802e-08	2.03787e-08	3.21633e-08	0	8.94501e-09
1813.73	8.25	9.7593e-08	0	1.09486e-09	0	2.45054e-08	0	0	7.41765e-09	2.46347e-09	1.22332e-08	0	1.76e-08	1.73433e-08	1.17912e-08	0	1.22827e-08	0
1822.15	8.25	0	0	0	1.8142e-08	0	0	0	0	0	0	0	7.0936e-09	0	0	0	0	0
1830.56	8.25	0	0	0	0	0	0	0	0	0	0	0	0	0	0	0	0	0
1838.98	8.25	0	0	0	0	0	0	0	0	0	0	0	0	0	0	0	0	0
1847.4	8.25	0	0	0	0	0	0	0	0	0	0	0	0	0	0	0	0	0
1855.82	8.25	0	0	0	0	0	0	0	0	0	0	0	0	0	0	0	0	0
1864.23	8.25	0	0	2.92197e-08	5.71003e-08	2.93284e-08	3.44706e-08	0	2.95988e-08	3.9898e-08	1.03909e-07	0	5.64367e-08	1.48868e-08	6.45107e-08	4.50775e-08	0	6.42688e-09
1872.65	8.25	3.61379e-06	3.53255e-06	3.46413e-06	3.47401e-06	3.49319e-06	3.48424e-06	3.41821e-06	3.35355e-06	3.40904e-06	3.48015e-06	3.48268e-06	3.40273e-06	3.45058e-06	3.48877e-06	3.41951e-06	3.28076e-06	3.14861e-06
1881.07	8.25	6.09738e-05	3.96237e-05	3.95942e-05	3.94445e-05	3.94197e-05	3.93427e-05	3.9223e-05	3.90343e-05	3.88154e-05	3.86564e-05	3.81588e-05	3.76661e-05	3.69709e-05	3.59416e-05	3.36653e-05	3.07081e-05	2.8229e-05
1889.48	8.25	1.5054e-05	9.05708e-06	9.07621e-06	9.02254e-06	8.98143e-06	8.97862e-06	8.95813e-06	8.84387e-06	8.76276e-06	8.78055e-06	8.54608e-06	8.37753e-06	8.13098e-06	7.82485e-06	7.06092e-06	6.33685e-06	5.55639e-06
1897.9	8.25	2.99673e-06	1.45974e-06	1.46982e-06	1.475e-06	1.43877e-06	1.40683e-06	1.46683e-06	1.42948e-06	1.42049e-06	1.42902e-06	1.40514e-06	1.31145e-06	1.34144e-06	1.1354e-06	1.15355e-06	8.98815e-07	6.67194e-07
1906.32	8.25	9.74766e-07	4.00988e-07	4.21039e-07	5.75565e-07	4.33121e-07	4.61763e-07	4.83755e-07	5.20346e-07	4.3267e-07	4.66572e-07	4.24553e-07	3.76209e-07	5.07817e-07	4.28325e-07	4.79571e-07	3.65446e-07	3.75285e-07
1914.73	8.25	4.81773e-07	2.31899e-07	2.59224e-07	1.95026e-07	3.85321e-07	2.68792e-07	2.331e-07	1.8155e-07	2.46758e-07	3.00009e-07	2.67532e-07	1.66719e-07	2.10648e-07	2.16981e-07	2.66408e-07	1.55023e-07	1.40142e-07
1923.15	8.25	5.67396e-07	2.57915e-07	3.18746e-07	3.27243e-07	3.70552e-07	3.30674e-07	2.83928e-07	3.16091e-07	3.25151e-07	3.4762e-07	2.25737e-07	2.70538e-07	3.20253e-07	2.3148e-07	1.96476e-07	1.48339e-07	9.47238e-08
1931.57	8.25	2.52489e-06	1.10721e-06	1.08053e-06	1.02506e-06	1.0566e-06	1.04767e-06	1.00127e-06	9.9588e-07	9.60428e-07	9.5029e-07	8.40575e-07	8.66533e-07	8.48759e-07	7.30663e-07	6.99844e-07	5.45712e-07	3.88495e-07
1939.98	8.25	0.000130475	6.3194e-05	6.25103e-05	6.17134e-05	6.10472e-05	6.03007e-05	5.95453e-05	5.81017e-05	5.66504e-05	5.5147e-05	5.23223e-05	4.94762e-05	4.66331e-05	4.24484e-05	3.4927e-05	2.76263e-05	2.20534e-05
1948.4	8.25	0.00072262	0.000497209	0.000493951	0.000490707	0.000487395	0.000484111	0.000480775	0.000474083	0.000467258	0.000460298	0.000446106	0.000431445	0.000416538	0.000392608	0.000346321	0.000294654	0.000251583
1956.82	8.25	0.00154811	0.00111971	0.00111377	0.00110765	0.00110146	0.00109525	0.00108892	0.00107599	0.00106285	0.0010493	0.00102108	0.000991231	0.000960214	0.000909283	0.000808206	0.000692069	0.00059623
1965.23	8.25	0.00114728	0.000856285	0.000850831	0.000845307	0.000839758	0.000834195	0.000828591	0.000817285	0.000805839	0.00079429	0.000770665	0.000746326	0.000721784	0.000682155	0.0006047	0.000517023	0.000442189
1973.65	8.25	0.000375391	0.000290644	0.000288742	0.000286985	0.000285034	0.000283127	0.000281209	0.000277448	0.000273548	0.000269634	0.000261737	0.000253674	0.000245629	0.000232769	0.000207511	0.00017876	0.000153115
1982.07	8.25	6.3043e-05	4.90052e-05	4.86028e-05	4.8256e-05	4.79839e-05	4.76718e-05	4.71982e-05	4.65566e-05	4.58505e-05	4.51665e-05	4.37148e-05	4.22888e-05	4.08349e-05	3.85835e-05	3.40789e-05	2.89696e-05	2.44332e-05
1990.48	8.25	4.81574e-05	3.76555e-05	3.73984e-05	3.70217e-05	3.67365e-05	3.65268e-05	3.62329e-05	3.56664e-05	3.52291e-05	3.46958e-05	3.36338e-05	3.25405e-05	3.14933e-05	2.97757e-05	2.64777e-05	2.27112e-05	1.93333e-05
1998.9	8.25	0.00108397	0.000878046	0.000873738	0.000869342	0.000864944	0.000860507	0.000856013	0.000846901	0.000837639	0.000828134	0.00080862	0.000788088	0.000766918	0.00073193	0.00066049	0.000574678	0.000499401
2007.32	8.25	0.00284237	0.00208823	0.00207523	0.00206217	0.00204899	0.00203565	0.00202221	0.00199508	0.00196737	0.00193911	0.00188103	0.00182024	0.00175721	0.00165461	0.0014526	0.00122247	0.00103878
2015.73	8.25	0.00276686	0.00192152	0.00190722	0.0018928	0.00187828	0.00186389	0.00184926	0.00181992	0.00179031	0.00176039	0.00169938	0.00163679	0.00157313	0.00147116	0.00127523	0.00105848	0.000885622
2024.15	8.25	0.000834462	0.000633213	0.000628594	0.00062398	0.000619305	0.000614645	0.000609997	0.000600664	0.000591289	0.000581881	0.00056286	0.00054345	0.000524289	0.000493617	0.000433852	0.00036647	0.000307637
2032.57	8.25	0.000305396	0.000237598	0.000236049	0.000234243	0.000232631	0.000230832	0.000229119	0.000225677	0.000222234	0.000218747	0.000211799	0.000204707	0.000197757	0.000186635	0.000164812	0.00014007	0.000117617
2040.98	8.25	0.000301341	0.000247556	0.000246153	0.00024481	0.000243451	0.000242084	0.000240673	0.000237896	0.000235083	0.000232243	0.000226468	0.000220507	0.000214592	0.000204963	0.000185435	0.000162202	0.000140484
2049.4	8.25	0.000724733	0.000576897	0.000573408	0.00056976	0.000566189	0.000562595	0.000558982	0.000551725	0.000544365	0.000536976	0.000521911	0.00050642	0.000491019	0.000466099	0.000416033	0.000357412	0.000304574
2057.82	8.25	0.000869293	0.00069833	0.000694243	0.000690111	0.000686042	0.00068193	0.000677741	0.000669441	0.000661025	0.000652495	0.000635064	0.00061711	0.000599107	0.000569836	0.000510431	0.000439836	0.000376409
2066.23	8.25	0.000910536	0.00071202	0.000707324	0.000702666	0.000697964	0.000693289	0.00068857	0.00067907	0.000669579	0.000659944	0.000640493	0.000620553	0.000600704	0.000568751	0.000504964	0.000430745	0.000364772
2074.65	8.25	0.000586986	0.000461271	0.00045818	0.000455126	0.000451981	0.000448875	0.000445754	0.000439521	0.000433219	0.000426875	0.00041406	0.000400903	0.00038797	0.000367067	0.00032551	0.000277123	0.000233522
2083.07	8.25	0.000310835	0.000243708	0.00024206	0.00024035	0.000238579	0.000236852	0.000235116	0.000231669	0.00022817	0.000224669	0.000217637	0.000210466	0.00020344	0.000192177	0.000169908	0.000144341	0.000120717
2091.48	8.25	0.000187719	0.000145304	0.000144244	0.000143062	0.00014197	0.000140878	0.000139785	0.000137548	0.00013536	0.000133138	0.000128682	0.000124192	0.000119771	0.000112782	9.90512e-05	8.34532e-05	6.92481e-05
2099.9	8.25	6.55523e-05	5.18836e-05	5.15093e-05	5.12499e-05	5.07679e-05	5.04005e-05	5.00444e-05	4.93346e-05	4.86081e-05	4.78914e-05	4.64179e-05	4.49526e-05	4.35321e-05	4.11553e-05	3.65967e-05	3.13025e-05	2.62677e-05
2108.32	8.25	2.64002e-05	2.16069e-05	2.13806e-05	2.10967e-05	2.1034e-05	2.09071e-05	2.07759e-05	2.05142e-05	2.02511e-05	1.99775e-05	1.94342e-05	1.88772e-05	1.83306e-05	1.74244e-05	1.56624e-05	1.35685e-05	1.15062e-05
2116.73	8.25	1.82356e-05	1.46108e-05	1.44873e-05	1.44334e-05	1.44184e-05	1.43176e-05	1.42183e-05	1.40181e-05	1.38342e-05	1.36248e-05	1.32471e-05	1.28271e-05	1.24227e-05	1.1839e-05	1.05255e-05	9.09729e-06	7.82246e-06
2125.15	8.25	3.26172e-06	2.38286e-06	2.44727e-06	2.50473e-06	2.42146e-06	2.39343e-06	2.37477e-06	2.31996e-06	2.30998e-06	2.26793e-06	2.18545e-06	2.15881e-06	2.09081e-06	1.9855e-06	1.76805e-06	1.39669e-06	1.18561e-06
2133.57	8.25	1.8902e-06	1.51036e-06	1.47583e-06	1.33637e-06	1.44191e-06	1.43214e-06	1.43444e-06	1.40743e-06	1.38421e-06	1.36098e-06	1.30536e-06	1.27644e-06	1.22093e-06	1.12253e-06	9.96635e-07	8.75778e-07	8.78267e-07
2141.98	8.25	2.42751e-06	2.01189e-06	1.81758e-06	1.85492e-06	1.83833e-06	1.81405e-06	1.81594e-06	1.77867e-06	1.75829e-06	1.73062e-06	1.67811e-06	1.63499e-06	1.57635e-06	1.54346e-06	1.46208e-06	1.27279e-06	9.90435e-07
2150.4	8.25	1.99333e-05	1.68453e-05	1.66482e-05	1.65763e-05	1.6501e-05	1.64096e-05	1.63194e-05	1.61443e-05	1.59656e-05	1.57935e-05	1.54699e-05	1.50817e-05	1.472e-05	1.4127e-05	1.28058e-05	1.1226e-05	9.80023e-06
2158.82	8.25	1.17331e-05	9.95939e-06	9.88391e-06	9.8233e-06	9.76835e-06	9.71456e-06	9.65645e-06	9.56584e-06	9.46124e-06	9.36661e-06	9.15515e-06	8.96905e-06	8.7306e-06	8.41874e-06	7.71611e-06	6.84857e-06	5.86238e-06
2167.23	8.25	9.31808e-06	7.62441e-06	7.60843e-06	7.53842e-06	7.51067e-06	7.46014e-06	7.41933e-06	7.30759e-06	7.23732e-06	7.12255e-06	6.9743e-06	6.76966e-06	6.5795e-06	6.23825e-06	5.68731e-06	4.82427e-06	4.17649e-06
2175.65	8.25	2.69346e-06	2.11957e-06	2.12881e-06	2.10679e-06	2.10249e-06	2.08552e-06	2.05603e-06	2.02029e-06	2.00725e-06	1.98731e-06	1.91665e-06	1.86881e-06	1.83336e-06	1.75845e-06	1.53253e-06	1.36128e-06	1.11765e-06
2184.07	8.25	6.60637e-07	5.30026e-07	5.27792e-07	5.21211e-07	5.23022e-07	5.06935e-07	5.09066e-07	5.05294e-07	4.95281e-07	4.81011e-07	4.62448e-07	4.56288e-07	4.79891e-07	4.17283e-07	3.78565e-07	3.3005e-07	2.71731e-07
2192.48	8.25	7.18141e-07	6.03792e-07	5.81291e-07	5.81921e-07	5.97625e-07	5.7538e-07	5.62916e-07	5.841e-07	5.39376e-07	5.64522e-07	5.31262e-07	5.30042e-07	4.88735e-07	4.75687e-07	3.90216e-07	2.19197e-07	2.64652e-07
2200.9	8.25	1.3224e-07	1.30763e-07	1.08092e-07	7.34361e-08	5.39588e-08	1.18529e-07	9.55142e-08	9.77316e-08	8.47926e-08	6.52455e-08	6.11378e-08	1.05343e-07	6.3947e-08	5.17523e-08	1.72325e-07	1.85582e-07	4.61947e-08
2209.32	8.25	2.8624e-07	2.18769e-07	2.08085e-07	1.97313e-07	2.13767e-07	1.96884e-07	2.05834e-07	2.03365e-07	1.85152e-07	1.82941e-07	2.02414e-07	1.90504e-07	1.88179e-07	1.30784e-07	2.1001e-07	7.03737e-08	1.43781e-07
2217.73	8.25	2.2475e-07	1.36332e-07	1.36361e-07	1.47547e-07	1.58034e-07	1.52177e-07	1.54561e-07	1.35718e-07	1.26632e-07	1.17444e-07	1.04338e-07	1.88343e-07	1.4059e-07	1.01234e-07	3.15746e-08	2.14063e-08	5.74145e-08
2226.15	8.25	1.87592e-07	1.7978e-07	1.63848e-07	1.70955e-07	1.6278e-07	1.60053e-07	1.69307e-07	1.52323e-07	1.36578e-07	1.93909e-07	1.64641e-07	1.77195e-07	1.50077e-07	9.14706e-08	6.39892e-08	1.134e-07	1.21488e-07
2234.57	8.25	6.02063e-08	5.87143e-08	6.2698e-08	2.86316e-08	6.16266e-08	4.34901e-08	5.70694e-08	5.04691e-08	1.87155e-08	4.06282e-08	1.54419e-08	5.73388e-08	1.78693e-08	5.70227e-08	6.59876e-08	-1.72558e-23	3.47405e-08
2242.98	8.25	3.17976e-08	1.88551e-08	5.5298e-08	4.5361e-08	4.27107e-08	4.49587e-08	2.22823e-08	5.8115e-08	3.78395e-08	4.34257e-08	4.94898e-08	2.55426e-08	7.41738e-09	2.68318e-08	3.70274e-08	5.29607e-08	1.6735e-08
2251.4	8.25	1.97843e-07	1.52988e-07	1.64069e-07	1.26937e-07	1.54594e-07	1.59295e-07	1.40282e-07	1.47285e-07	1.40078e-07	1.27669e-07	1.56083e-07	9.80964e-08	9.6662e-08	1.02553e-07	1.52301e-07	1.3483e-07	6.47439e-08
2259.82	8.25	9.7332e-08	1.02429e-07	1.0142e-07	1.29544e-07	1.22877e-07	1.03103e-07	1.55244e-07	1.07274e-07	1.14928e-07	1.43215e-07	9.15517e-08	9.35789e-08	1.50101e-07	5.70186e-08	0	2.90868e-08	7.8389e-08
2268.23	8.25	9.37316e-09	4.26291e-08	3.68835e-08	2.2854e-08	1.94743e-08	4.20058e-08	2.54144e-08	5.0646e-08	3.98024e-08	1.65658e-08	0	4.2229e-08	5.81423e-08	2.46738e-08	3.94379e-09	6.46225e-08	5.15853e-08
2276.65	8.25	1.4642e-07	6.03988e-08	6.66893e-08	8.05867e-08	4.00531e-08	5.39524e-08	8.16323e-08	5.12855e-08	6.98259e-08	5.73735e-08	3.91689e-08	5.77479e-08	1.35525e-07	1.24809e-07	2.92562e-08	8.25766e-09	3.7858e-08
2285.07	8.25	0	9.46592e-09	6.4575e-09	3.24571e-08	0	4.7247e-09	3.58984e-08	5.84005e-09	0	5.32407e-09	3.311e-08	1.62407e-08	1.74046e-08	0	0	-3.3421e-08	1.56302e-08
2293.48	8.25	0	1.43258e-08	3.4249e-09	9.30802e-09	1.61427e-08	1.85609e-08	4.39901e-08	0	8.57602e-09	0	2.36902e-08	0	9.22064e-09	0	0	0	0
2301.9	8.25	0	4.30096e-24	0	0	0	0	1.78407e-08	-2.26233e-09	6.70379e-09	0	0	0	2.40887e-08	0	0	0	1.23658e-08
2310.32	8.25	0	6.92922e-09	0	1.61189e-08	0	-4.35815e-25	0	1.31117e-08	0	0	1.52986e-08	0	0	0	0	0	0
2318.73	8.25	0	0	0	0	0	0	0	0	0	1.8353e-08	0	0	0	0	0	0	0
2327.15	8.25	0	0	0	5.21668e-09	0	1.09153e-08	0	0	0	0	-4.39968e-09	0	1.15375e-08	0	0	0	7.31861e-09
2335.57	8.25	0	0	5.84189e-09	0	0	0	0	0	0	0	-1.46786e-08	0	0	0	0	-1.25759e-08	0
2343.98	8.25	0	0	0	0	0	0	0	0	0	1.92777e-08	0	0	0	0	0	1.28875e-08	0
2352.4	8.25	0	0	6.23377e-09	0	0	0	0	0	0	0	0	0	0	0	0	0	0
2360.82	8.25	0	-2.64666e-09	0	0	-7.45108e-09	0	0	0	8.91719e-09	0	2.54955e-08	1.67724e-08	0	0	0	8.93759e-09	0
2369.23	8.25	0	0	1.47133e-09	1.75917e-08	0	3.8526e-08	2.31864e-08	0	0	0	0	2.27474e-08	0	0	0	0	0
2377.65	8.25	0	0	0	-3.68009e-25	-4.75608e-09	0	0	0	0	0	0	0	0	0	0	0	0
2386.07	8.25	0	0	0	0	0	2.99358e-09	0	0	1.72652e-08	-2.55385e-08	0	0	0	0	0	2.28505e-08	2.29916e-08
2394.48	8.25	0	0	-1.39114e-08	0	0	0	0	0	2.96306e-08	-2.39195e-08	-2.71363e-08	0	0	0	4.26608e-08	4.89908e-09	0
2402.9	8.25	0	0	0	8.38176e-09	0	0	0	0	0	0	0	0	1.76968e-08	0	0	-6.98222e-09	0
2411.32	8.25	0	1.31226e-08	-8.59728e-09	3.17278e-09	5.60349e-09	0	9.20057e-09	0	0	0	0	0	0	0	0	-3.02079e-09	0
2419.73	8.25	0	0	0	0	-2.50157e-09	0	1.92591e-08	0	0	0	0	0	0	0	0	-5.24723e-09	0
2428.15	8.25	0	1.07123e-08	0	2.17239e-08	0	0	0	0	0	0	-6.02641e-09	0	0	0	0	-4.73183e-09	0
2436.57	8.25	2.10612e-08	0	1.06311e-08	0	7.97058e-25	0	1.179e-08	1.69325e-09	2.61084e-08	1.65096e-08	3.51708e-08	0	0	0	9.49752e-09	-1.68704e-09	0
2444.98	8.25	1.82472e-09	-2.02642e-24	0	0	0	0	0	0	0	0	0	3.35926e-09	3.84325e-08	0	0	7.82689e-09	2.5816e-08
2453.4	8.25	0	0	0	0	0	0	0	0	0	4.15651e-08	0	0	3.3536e-08	1.32703e-08	0	-1.02294e-08	0
2461.82	8.25	2.1131e-08	1.24906e-08	0	1.10112e-08	0	2.61349e-08	0	7.2264e-08	0	0	1.27751e-08	0	2.91941e-08	0	0	1.6444e-08	0
2470.23	8.25	1.15421e-07	1.10001e-07	1.33563e-08	2.13918e-08	3.7685e-08	3.79352e-08	6.73155e-08	6.35237e-08	7.88208e-08	3.02211e-08	5.84486e-08	4.69863e-08	1.98412e-09	3.09489e-08	0	3.77385e-24	5.70655e-08
2478.65	8.25	3.18498e-07	1.98238e-07	1.77406e-07	1.92829e-07	2.29272e-07	1.87683e-07	2.12696e-07	1.55635e-07	1.96449e-07	1.72003e-07	1.51124e-07	1.94882e-07	1.75685e-07	1.96096e-07	7.31726e-08	8.52997e-08	5.8468e-08
2487.07	8.25	5.45755e-06	3.80517e-06	3.73359e-06	3.7636e-06	3.57322e-06	3.65622e-06	3.646e-06	3.54738e-06	3.56234e-06	3.43057e-06	3.29784e-06	3.13338e-06	3.0843e-06	3.00842e-06	2.5693e-06	2.08316e-06	1.66782e-06
2495.48	8.25	1.6988e-06	1.34323e-06	1.36677e-06	1.26862e-06	1.28449e-06	1.33787e-06	1.24929e-06	1.24273e-06	1.29178e-06	1.16073e-06	1.15537e-06	1.24112e-06	1.1338e-06	1.06774e-06	8.71676e-07	7.3135e-07	5.97975e-07
2503.9	8.25	1.43652e-06	1.11846e-06	1.11764e-06	1.05028e-06	1.05244e-06	1.09221e-06	1.03477e-06	1.04092e-06	1.00481e-06	1.10076e-06	1.00131e-06	9.70179e-07	9.05282e-07	7.85758e-07	8.2534e-07	6.5058e-07	5.27259e-07
2512.32	8.25	1.55725e-06	9.35085e-07	9.85909e-07	1.06337e-06	8.81557e-07	9.9774e-07	1.02428e-06	9.15043e-07	9.81757e-07	8.44942e-07	8.10702e-07	9.68637e-07	7.70199e-07	1.05277e-06	7.63513e-07	6.46615e-07	5.87286e-07
2520.73	8.25	1.22397e-06	6.82361e-07	8.15309e-07	6.82434e-07	7.20571e-07	7.50833e-07	6.64781e-07	7.02487e-07	6.92577e-07	8.142e-07	7.30154e-07	6.74697e-07	6.26595e-07	5.61393e-07	5.57575e-07	4.51574e-07	3.61006e-07

## Sheet: k_GF5
Wavelength	FWHM	k_Summer_L	k_Summer_M	k_Summer_H	k_Winter_L	k_Winter_M	k_Winter_H	k_1976_L	k_1976_M	k_1976_H
1004.77	7.67828	0	0	0	0	0	0	0	0	0	0	0	0	0	0	0	0	0
1013.2	7.68189	0	0	0	0	0	0	0	0	0	0	0	0	0	0	0	0	0
1021.62	7.68551	0	0	0	0	0	0	0	0	0	0	0	0	0	0	0	0	0
1030.05	7.68912	0	0	0	0	0	0	0	0	0	0	0	0	0	0	0	0	0
1038.48	7.69273	6.81302e-07	5.11433e-07	5.13046e-07	5.24791e-07	5.08006e-07	5.02158e-07	4.97269e-07	4.79216e-07	4.78707e-07	4.70228e-07	4.66586e-07	4.46527e-07	4.2012e-07	4.20008e-07	3.65305e-07	3.38713e-07	3.4832e-07
1046.91	7.69634	7.05678e-07	5.47456e-07	5.39748e-07	5.36575e-07	5.42757e-07	5.33934e-07	5.23611e-07	5.21043e-07	5.21038e-07	5.03406e-07	4.99324e-07	4.92637e-07	4.64393e-07	4.3903e-07	4.27399e-07	3.57905e-07	3.11412e-07
1055.33	7.69995	7.11171e-07	5.27677e-07	5.16747e-07	5.28668e-07	5.2242e-07	5.22147e-07	5.02826e-07	5.21356e-07	5.24942e-07	5.09182e-07	4.90071e-07	4.69005e-07	4.4606e-07	4.12123e-07	3.49969e-07	3.44338e-07	3.03772e-07
1063.76	7.70356	3.0944e-07	2.37864e-07	2.34131e-07	2.19933e-07	2.16001e-07	2.35577e-07	2.26363e-07	2.14756e-07	2.09935e-07	2.11989e-07	2.04456e-07	2.04957e-07	2.1007e-07	1.7099e-07	1.92352e-07	1.51322e-07	1.24523e-07
1072.19	7.70718	4.48631e-08	4.18811e-08	4.55532e-08	5.38342e-08	2.8036e-08	3.93911e-08	2.39427e-08	5.50673e-08	3.88085e-08	4.49305e-08	5.37321e-08	4.14522e-08	1.76935e-08	1.42435e-08	2.42873e-08	2.49986e-08	3.19418e-08
1080.62	7.71079	1.49261e-08	1.52355e-25	5.43973e-25	5.21106e-09	8.9085e-09	7.56047e-09	2.92045e-09	8.48755e-09	0	6.74086e-09	8.00359e-09	1.41966e-08	0	0	3.49487e-09	-5.17291e-09	-1.47438e-08
1089.04	7.7144	0	2.92001e-09	0	0	0	0	0	4.50596e-09	0	-7.28738e-10	0	0	0	0	0	0	0
1097.47	7.71801	0	0	0	0	0	-1.46162e-09	3.23732e-09	7.7007e-09	0	5.93527e-09	0	0	0	0	0	0	0
1105.9	7.72162	0	0	0	0	0	0	0	0	0	0	0	0	0	0	0	0	0
1114.32	7.72523	0	0	0	0	2.97902e-24	0	4.08497e-09	0	4.41864e-10	-2.73536e-09	0	0	0	0	6.32996e-09	0	6.04092e-09
1122.75	7.72885	0	0	0	0	0	0	0	0	0	0	0	0	0	0	0	0	0
1131.18	7.73246	0	0	0	2.90837e-09	0	0	0	7.22699e-09	0	0	1.0821e-08	0	5.26741e-24	0	0	0	7.52195e-10
1139.61	7.73607	0	0	0	0	0	0	0	0	0	0	0	0	0	0	0	0	0
1148.03	7.73968	0	3.26397e-09	0	0	0	0	0	0	0	0	0	0	0	0	0	0	0
1156.46	7.74329	0	0	0	0	0	0	0	0	0	0	0	0	0	0	0	0	0
1164.89	7.7469	0	0	0	0	-6.93153e-09	0	0	0	0	0	0	0	0	0	0	0	0
1173.32	7.75052	0	0	0	0	0	0	0	0	0	0	0	4.77291e-09	0	0	0	0	0
1181.74	7.75413	0	0	0	0	0	0	0	0	0	0	0	0	0	0	0	0	0
1190.17	7.75774	0	0	0	0	0	0	0	0	0	0	0	0	0	0	0	0	0
1198.6	7.76135	0	1.0161e-24	4.08561e-09	0	8.77691e-09	0	0	0	0	3.21991e-09	0	9.15054e-10	6.22746e-09	0	1.40637e-08	0	-9.9156e-24
1206.8	7.3271	4.35965e-05	3.46182e-05	3.44264e-05	3.42317e-05	3.40527e-05	3.38528e-05	3.36458e-05	3.32535e-05	3.28211e-05	3.24398e-05	3.1609e-05	3.08085e-05	2.99915e-05	2.8753e-05	2.6413e-05	2.41175e-05	2.19105e-05
1215.2	7.76857	8.98216e-06	6.76393e-06	6.71347e-06	6.64655e-06	6.60356e-06	6.5814e-06	6.53452e-06	6.44355e-06	6.31688e-06	6.24214e-06	6.04972e-06	5.88013e-06	5.66189e-06	5.44769e-06	4.87507e-06	4.40018e-06	3.86939e-06
1223.6	8.1949	1.96485e-05	1.54106e-05	1.53036e-05	1.52056e-05	1.51015e-05	1.50321e-05	1.49361e-05	1.47169e-05	1.45384e-05	1.43836e-05	1.39552e-05	1.35888e-05	1.31971e-05	1.26202e-05	1.15701e-05	1.05017e-05	9.51094e-06
1232.34	8.48475	1.78888e-06	1.31501e-06	1.32823e-06	1.30632e-06	1.2892e-06	1.29092e-06	1.26359e-06	1.26673e-06	1.23166e-06	1.21757e-06	1.15127e-06	1.10897e-06	1.05254e-06	1.02821e-06	8.98027e-07	8.26614e-07	7.13414e-07
1240.76	8.26	4.62561e-07	3.42842e-07	2.98434e-07	3.31286e-07	3.49726e-07	3.29638e-07	3.64128e-07	3.36173e-07	3.16057e-07	3.16822e-07	3.05299e-07	3.10335e-07	2.90665e-07	2.80694e-07	2.28066e-07	1.93445e-07	1.74033e-07
1249.21	7.78302	1.37978e-07	9.46359e-08	1.16258e-07	1.10623e-07	1.18192e-07	1.12392e-07	1.09028e-07	1.25151e-07	1.33815e-07	8.7607e-08	9.84925e-08	1.02212e-07	9.27795e-08	1.23704e-07	1.26914e-07	1.5569e-07	8.66223e-08
1257.66	7.78663	1.96568e-07	1.58543e-07	1.69072e-07	1.31974e-07	1.34683e-07	1.21527e-07	1.22633e-07	1.78008e-07	1.31591e-07	1.55679e-07	1.28072e-07	1.36795e-07	7.66066e-08	1.7514e-07	1.17861e-07	1.27728e-07	3.499e-08
1266.1	7.79024	2.34775e-07	1.77788e-07	1.7837e-07	1.9192e-07	1.50901e-07	1.63279e-07	1.72694e-07	1.57641e-07	1.86387e-07	1.65361e-07	1.38826e-07	1.62957e-07	1.80639e-07	1.75258e-07	6.84967e-08	6.01928e-08	1.25868e-07
1274.55	7.79386	0	-8.17326e-09	5.30427e-09	1.80713e-09	1.20942e-24	4.62931e-09	7.08662e-09	0	0	0	0	0	0	0	0	0	-6.50868e-10
1283	7.79747	2.98504e-08	1.39518e-08	2.21862e-08	1.66143e-08	1.70105e-08	2.34984e-08	3.85559e-08	1.31983e-08	2.78236e-08	2.32064e-08	2.25503e-08	3.2793e-08	7.95626e-09	1.94702e-08	2.04177e-24	0	8.52871e-09
1291.45	7.80108	2.33997e-06	1.86903e-06	1.86681e-06	1.79003e-06	1.80699e-06	1.82679e-06	1.7936e-06	1.79123e-06	1.76035e-06	1.76071e-06	1.67412e-06	1.64886e-06	1.61318e-06	1.5093e-06	1.43647e-06	1.27832e-06	1.13298e-06
1299.9	7.80469	3.90769e-07	2.96788e-07	3.02434e-07	2.78413e-07	3.17647e-07	2.93118e-07	3.1861e-07	2.82967e-07	3.07658e-07	2.81935e-07	2.95995e-07	2.68597e-07	2.81784e-07	2.67493e-07	2.16683e-07	1.61536e-07	1.92152e-07
1308.34	7.8083	5.62144e-08	3.80282e-08	1.48616e-08	2.39547e-08	5.26837e-08	5.31376e-08	1.68147e-08	2.26373e-08	2.66136e-08	2.77358e-08	2.20062e-08	3.04404e-08	1.62459e-08	1.79268e-08	1.91064e-08	1.85223e-08	4.1534e-09
1316.79	7.81191	8.95819e-06	7.01995e-06	6.99209e-06	6.929e-06	6.88692e-06	6.83547e-06	6.78968e-06	6.7069e-06	6.61313e-06	6.54843e-06	6.39238e-06	6.21065e-06	6.02128e-06	5.71782e-06	5.29096e-06	4.69216e-06	4.33956e-06
1325.24	7.81553	9.00389e-07	6.30161e-07	6.41771e-07	6.24591e-07	6.26403e-07	6.42728e-07	6.30323e-07	6.2127e-07	5.84293e-07	5.6028e-07	5.51778e-07	5.72837e-07	5.37699e-07	5.10146e-07	4.07296e-07	3.95389e-07	3.41566e-07
1333.69	7.81914	7.53479e-07	5.55566e-07	5.86415e-07	5.40297e-07	5.72025e-07	5.26547e-07	4.97441e-07	5.36665e-07	5.48871e-07	4.84357e-07	4.86069e-07	4.45087e-07	4.28702e-07	4.71443e-07	4.59878e-07	3.65515e-07	3.17818e-07
1342.14	7.82275	3.29917e-06	2.46541e-06	2.47685e-06	2.45348e-06	2.42105e-06	2.42208e-06	2.39597e-06	2.36461e-06	2.31752e-06	2.2883e-06	2.25348e-06	2.18405e-06	2.10669e-06	2.04279e-06	1.87176e-06	1.67691e-06	1.50486e-06
1350.58	7.82636	3.45924e-07	1.50533e-07	1.27024e-07	2.06299e-07	1.19493e-07	1.25369e-07	2.24506e-07	1.92107e-07	1.85728e-07	6.20634e-08	1.08639e-07	1.66181e-07	1.22162e-07	7.64381e-08	1.054e-07	6.32711e-08	7.60212e-08
1359.03	7.82997	3.22504e-08	1.27101e-08	2.19133e-08	1.15346e-08	1.38413e-08	2.61207e-08	1.09124e-08	9.40093e-09	5.63964e-09	1.49437e-08	7.55069e-09	3.91229e-08	1.90708e-08	7.06861e-09	2.31042e-08	8.73535e-09	0
1367.48	7.83358	1.13624e-07	5.65761e-08	7.83341e-08	6.29996e-08	7.75935e-08	6.40823e-08	7.4336e-08	7.82116e-08	6.0288e-08	8.21678e-08	7.37814e-08	7.85541e-08	9.82362e-08	8.37229e-08	8.91357e-08	8.03656e-08	7.02191e-08
1375.93	7.8372	2.10692e-07	2.13676e-07	1.14478e-07	1.06528e-07	9.09517e-08	1.79271e-07	9.33747e-08	2.43582e-07	1.27046e-07	1.14446e-07	1.47749e-07	7.3609e-08	6.58839e-08	9.75338e-08	1.22974e-07	1.08736e-07	1.16239e-07
1384.37	7.84081	9.33226e-09	0	9.62622e-09	0	7.70762e-09	6.83381e-09	1.24826e-08	5.94633e-09	2.47582e-24	1.33576e-08	3.19864e-09	6.94655e-09	0	1.55651e-08	1.73749e-08	6.31252e-09	1.52233e-08
1392.82	7.84442	0	0	2.40329e-09	2.61304e-09	0	2.42074e-09	4.69564e-09	0	0	2.44885e-09	5.13379e-09	2.7735e-09	0	0	0	0	1.01547e-08
1401.27	7.84803	0	0	2.46381e-08	0	0	0	-5.59408e-09	3.65803e-09	2.56706e-09	0	-9.76546e-25	0	4.00391e-09	0	8.08957e-09	0	3.28425e-09
1409.72	7.85164	1.88678e-10	0	3.58254e-09	2.91466e-08	0	0	0	0	0	0	0	0	-2.01734e-08	0	0	0	0
1418.17	7.85525	0	0	0	0	0	0	0	0	3.021e-09	0	1.73815e-09	0	0	0	2.66564e-09	0	0
1426.61	7.85887	9.24332e-07	3.63989e-07	3.96886e-07	3.93119e-07	3.77565e-07	3.56949e-07	3.61297e-07	3.23469e-07	3.29174e-07	3.00748e-07	3.02124e-07	3.16536e-07	2.517e-07	2.57979e-07	1.62173e-07	1.68285e-07	1.0795e-07
1435.06	7.86248	0.000318927	0.000235165	0.000234207	0.00023319	0.000232187	0.000231099	0.000230199	0.000228092	0.000225973	0.000223705	0.00021911	0.000214415	0.000209567	0.000201757	0.000187109	0.000171429	0.000156798
1443.51	7.86609	0.000139016	9.4472e-05	9.39149e-05	9.32987e-05	9.27284e-05	9.20362e-05	9.14774e-05	9.02444e-05	8.91139e-05	8.78073e-05	8.52153e-05	8.2633e-05	8.00831e-05	7.60789e-05	6.88526e-05	6.14519e-05	5.48648e-05
1451.96	7.8697	1.01565e-05	6.5312e-06	6.44407e-06	6.37018e-06	6.34451e-06	6.33789e-06	6.2386e-06	6.07126e-06	6.00418e-06	5.84457e-06	5.63055e-06	5.33969e-06	5.18281e-06	4.83738e-06	4.26674e-06	3.67327e-06	3.17537e-06
1460.4	7.87331	4.29486e-07	2.02116e-07	2.85164e-07	2.53221e-07	2.15642e-07	2.21578e-07	2.53852e-07	1.97873e-07	1.89667e-07	1.9103e-07	2.18515e-07	2.41834e-07	1.83444e-07	9.52279e-08	1.84066e-07	1.08425e-07	9.10424e-08
1468.85	7.87692	4.44216e-06	3.3692e-06	3.3682e-06	3.41306e-06	3.36898e-06	3.32012e-06	3.31968e-06	3.26528e-06	3.27799e-06	3.21345e-06	3.1491e-06	3.09565e-06	2.98739e-06	2.8804e-06	2.66153e-06	2.41196e-06	2.19243e-06
1477.3	7.88054	9.574e-06	7.59523e-06	7.57036e-06	7.53196e-06	7.48788e-06	7.45754e-06	7.44914e-06	7.3426e-06	7.28337e-06	7.18641e-06	7.02094e-06	6.90297e-06	6.75414e-06	6.40542e-06	5.93889e-06	5.49131e-06	4.98949e-06
1485.75	7.88415	1.78222e-06	1.21058e-06	1.29494e-06	1.20748e-06	1.17346e-06	1.21958e-06	1.2318e-06	1.13569e-06	1.15259e-06	1.15199e-06	1.12341e-06	1.11519e-06	9.37021e-07	9.68905e-07	8.68842e-07	7.5963e-07	6.85109e-07
1494.2	7.88776	3.36739e-06	2.60644e-06	2.54874e-06	2.57117e-06	2.50934e-06	2.47041e-06	2.50848e-06	2.47579e-06	2.47452e-06	2.36358e-06	2.29413e-06	2.25106e-06	2.11453e-06	2.06134e-06	1.91335e-06	1.68914e-06	1.51684e-06
1502.64	7.89137	4.99053e-07	4.18897e-07	3.61793e-07	3.8356e-07	3.62985e-07	3.97884e-07	4.42973e-07	3.42969e-07	3.91762e-07	3.41272e-07	3.3989e-07	3.96289e-07	3.40533e-07	3.12137e-07	3.3294e-07	2.53624e-07	2.47812e-07
1511.09	7.89498	2.04281e-08	7.46394e-09	9.03237e-09	2.88532e-08	3.13282e-08	2.02598e-08	0	1.09298e-08	1.14689e-08	8.91429e-09	1.58771e-08	0	2.84816e-24	1.22779e-08	-1.11117e-09	4.3925e-09	-1.92091e-09
1519.54	7.89859	1.47683e-07	1.54035e-07	7.20398e-08	7.92722e-08	9.97136e-08	7.47947e-08	1.37861e-07	1.08165e-07	4.60178e-08	8.2364e-08	1.06837e-07	2.22223e-08	6.08653e-08	8.7428e-08	6.08186e-09	4.25227e-08	4.74186e-08
1527.99	7.90221	6.81515e-06	5.1727e-06	5.13042e-06	5.12259e-06	5.07191e-06	5.05835e-06	5.01251e-06	4.89836e-06	4.86421e-06	4.72282e-06	4.59957e-06	4.45561e-06	4.3255e-06	4.06381e-06	3.5892e-06	3.20991e-06	2.81544e-06
1536.43	7.90582	3.91441e-05	3.16169e-05	3.14015e-05	3.13132e-05	3.10728e-05	3.08781e-05	3.07184e-05	3.03557e-05	2.9974e-05	2.96694e-05	2.88392e-05	2.81633e-05	2.73537e-05	2.61738e-05	2.39951e-05	2.17247e-05	1.96052e-05
1544.88	7.90943	1.37284e-05	1.08287e-05	1.07388e-05	1.0683e-05	1.06193e-05	1.0537e-05	1.04803e-05	1.03406e-05	1.01906e-05	1.00597e-05	9.77259e-06	9.50001e-06	9.26522e-06	8.6968e-06	7.9185e-06	7.11099e-06	6.33662e-06
1553.33	6.6598	2.5332e-07	2.2063e-07	2.15246e-07	2.3521e-07	1.44145e-07	1.90117e-07	2.25567e-07	1.15765e-07	2.03981e-07	2.02679e-07	2.12946e-07	2.29408e-07	1.77251e-07	2.44952e-07	1.38643e-07	1.14264e-07	1.06325e-07
1560.93	8.4042	4.20485e-07	3.05672e-07	3.12967e-07	3.54074e-07	3.27188e-07	3.2836e-07	3.03226e-07	2.73355e-07	3.29327e-07	2.39564e-07	3.34986e-07	3.75565e-07	2.24353e-07	2.84679e-07	2.24181e-07	2.13586e-07	1.75885e-07
1569.23	7.8809	0.000131802	0.000103202	0.000102529	0.000101848	0.000101161	0.000100512	9.98224e-05	9.8516e-05	9.71157e-05	9.57593e-05	9.30398e-05	9.02033e-05	8.74183e-05	8.33079e-05	7.53662e-05	6.72533e-05	5.98032e-05
1577.61	7.45885	0.000175024	0.000140088	0.000139246	0.000138437	0.000137639	0.000136883	0.000135989	0.000134366	0.000132629	0.000130915	0.00012749	0.000123963	0.000120603	0.000115045	0.000105145	9.45773e-05	8.48033e-05
1586.31	7.4983	2.16249e-05	1.63828e-05	1.62773e-05	1.61495e-05	1.59718e-05	1.59012e-05	1.57876e-05	1.55227e-05	1.53274e-05	1.50098e-05	1.45197e-05	1.40043e-05	1.35735e-05	1.26524e-05	1.13742e-05	9.96084e-06	8.69907e-06
1594.96	7.7622	8.44555e-06	6.33401e-06	6.32205e-06	6.28913e-06	6.2032e-06	6.11768e-06	6.082e-06	6.00349e-06	5.89621e-06	5.81338e-06	5.61816e-06	5.39099e-06	5.2353e-06	4.98147e-06	4.33633e-06	3.78701e-06	3.32362e-06
1603.38	7.93471	0.000199492	0.000160328	0.000159456	0.000158502	0.000157578	0.000156693	0.000155693	0.000153822	0.000151949	0.000150043	0.00014616	0.000142175	0.000138239	0.000132012	0.000120571	0.000108358	9.70614e-05
1611.79	7.93832	0.000131932	0.00010435	0.000103683	0.000103073	0.000102421	0.000101695	0.000101042	9.97143e-05	9.83501e-05	9.69677e-05	9.42512e-05	9.15568e-05	8.87782e-05	8.45299e-05	7.65953e-05	6.83187e-05	6.07216e-05
1620.21	7.94194	1.47008e-05	1.06941e-05	1.06032e-05	1.04896e-05	1.03893e-05	1.03494e-05	1.02132e-05	1.0017e-05	9.82489e-06	9.6586e-06	9.31683e-06	8.89402e-06	8.49843e-06	7.95476e-06	6.92766e-06	5.92769e-06	5.05012e-06
1628.63	7.94555	4.14238e-06	3.31542e-06	3.3002e-06	3.24197e-06	3.26235e-06	3.18801e-06	3.19782e-06	3.20852e-06	3.10339e-06	3.0922e-06	2.97133e-06	2.8533e-06	2.79098e-06	2.75685e-06	2.4277e-06	2.14491e-06	1.88596e-06
1637.05	7.94916	1.17827e-05	9.31582e-06	9.23771e-06	9.22509e-06	9.1499e-06	9.04396e-06	8.97813e-06	8.92049e-06	8.7893e-06	8.70238e-06	8.46243e-06	8.12689e-06	7.85355e-06	7.62722e-06	6.77153e-06	5.99475e-06	5.32003e-06
1645.47	7.95277	3.15169e-05	2.58962e-05	2.57506e-05	2.55906e-05	2.54491e-05	2.53169e-05	2.52199e-05	2.48743e-05	2.45679e-05	2.43552e-05	2.38177e-05	2.31664e-05	2.25152e-05	2.16757e-05	1.98022e-05	1.7848e-05	1.60274e-05
1653.89	7.95638	1.39743e-05	1.09342e-05	1.09032e-05	1.0787e-05	1.06961e-05	1.06615e-05	1.05891e-05	1.04369e-05	1.02693e-05	1.01256e-05	9.87041e-06	9.60995e-06	9.24184e-06	8.62882e-06	7.89006e-06	6.94347e-06	6.1241e-06
1662.31	7.95999	2.58719e-06	1.95589e-06	2.01075e-06	1.96921e-06	1.95672e-06	1.97058e-06	1.95554e-06	1.88643e-06	1.84954e-06	1.86623e-06	1.78031e-06	1.67732e-06	1.64541e-06	1.5847e-06	1.36545e-06	1.22726e-06	1.05995e-06
1670.73	7.96361	1.02556e-06	6.67514e-07	7.48529e-07	7.7219e-07	7.82178e-07	7.35027e-07	6.96496e-07	7.12203e-07	6.87868e-07	6.71528e-07	6.5931e-07	6.11944e-07	7.33035e-07	5.78559e-07	5.20739e-07	4.59186e-07	3.97109e-07
1679.15	7.96722	2.63018e-07	2.21869e-07	1.95726e-07	1.35329e-07	1.28412e-07	3.06869e-07	1.63655e-07	2.48433e-07	2.15186e-07	2.62138e-07	1.4938e-07	2.29406e-07	7.46861e-08	1.64812e-07	1.42591e-07	1.42093e-07	1.15934e-07
1687.57	7.97083	9.06254e-08	1.3876e-07	3.01294e-08	1.21632e-07	1.46631e-07	3.92656e-08	1.71328e-08	1.42174e-07	8.32529e-08	2.46048e-08	1.0619e-07	1.28156e-07	1.449e-07	7.49518e-08	8.06337e-08	1.77521e-08	6.88518e-08
1695.99	7.97444	1.5006e-08	0	2.0123e-08	0	2.73991e-08	0	0	1.4815e-08	3.82509e-08	0	0	-1.52308e-25	0	1.76984e-09	1.66611e-09	7.51277e-09	-4.52355e-09
1704.41	7.97805	2.78512e-08	2.1667e-08	4.20793e-09	0	3.15356e-08	0	3.53801e-08	0	3.53058e-08	3.42596e-08	0	1.88281e-08	1.42617e-08	2.42309e-25	5.6305e-09	-1.697e-08	7.33362e-09
1712.83	7.98166	1.68794e-08	0	0	0	1.25684e-23	3.31265e-08	4.54685e-08	1.07902e-08	5.98891e-08	0	1.03854e-08	8.36971e-24	-3.22957e-24	7.51377e-09	1.33804e-08	-3.54342e-09	-1.41497e-08
1721.25	7.98528	0	0	-1.68324e-24	0	2.00389e-08	2.37611e-08	7.92757e-09	1.60738e-08	0	2.63874e-08	0	0	3.01592e-09	4.5053e-09	0	5.76674e-09	-1.44097e-08
1729.67	7.98889	0	1.34649e-08	0	1.27606e-08	0	0	0	0	0	0	0	0	0	7.84082e-09	-9.88428e-09	6.49742e-09	0
1738.08	7.9925	0	0	0	0	0	3.86718e-08	3.96909e-08	0	0	0	0	0	-1.88608e-09	1.05619e-08	1.15479e-08	0	0
1746.5	7.99611	0	0	0	0	0	0	0	0	0	0	0	0	0	0	0	0	0
1754.92	7.99972	2.80207e-07	1.73813e-07	2.1286e-07	8.79943e-08	1.52395e-07	1.9049e-07	1.73226e-07	1.19558e-07	1.20768e-07	1.28732e-07	8.34248e-08	2.07575e-07	1.01824e-07	1.33752e-07	1.268e-07	1.02447e-07	6.4815e-08
1763.34	8.00333	1.87469e-07	1.8996e-07	5.77307e-08	6.83801e-08	8.53786e-08	1.03071e-07	5.88226e-08	8.78534e-08	1.45386e-07	1.58241e-07	2.46338e-08	8.3246e-08	8.2578e-08	7.23952e-08	5.66815e-08	3.40187e-08	4.82704e-08
1771.76	8.00695	5.11153e-08	0	3.70696e-08	2.97543e-08	6.12757e-08	0	1.80589e-08	0	1.48196e-08	0	4.35724e-08	1.0229e-08	3.0342e-08	2.01641e-08	2.2141e-08	2.35726e-08	3.73743e-09
1780.18	8.01056	7.86255e-09	1.10973e-08	0	2.61792e-08	0	3.85106e-08	0	0	0	0	0	0	5.95866e-09	3.61006e-09	1.37314e-09	0	2.49758e-08
1788.6	8.01417	2.4896e-07	5.86188e-08	1.96893e-07	2.47293e-07	2.98614e-07	1.98267e-07	7.36643e-08	1.72539e-07	1.25692e-07	2.20703e-07	6.95671e-08	1.47942e-07	1.30378e-07	9.59351e-08	5.56149e-08	6.74257e-08	5.38137e-08
1797.02	8.01778	1.15708e-07	2.61208e-08	1.0522e-07	8.142e-08	7.09317e-08	7.42021e-08	5.60884e-08	7.14331e-08	1.27406e-07	3.96926e-08	3.26138e-08	6.02558e-08	4.14325e-08	5.69977e-08	4.0986e-08	2.0063e-08	2.27223e-08
1805.44	8.02139	8.44811e-08	7.20316e-08	5.88587e-09	1.12676e-08	2.24287e-09	8.91478e-08	5.20193e-09	7.74299e-09	5.54565e-09	2.04563e-08	8.56306e-09	4.9328e-09	1.39514e-08	2.05042e-08	3.24786e-08	0	8.96153e-09
1813.86	8.025	9.87001e-08	0	1.1047e-09	0	2.47715e-08	0	0	7.34962e-09	2.40242e-09	1.23451e-08	0	1.77929e-08	1.73615e-08	1.17766e-08	0	1.19761e-08	0
1822.28	8.02862	0	0	0	1.81956e-08	0	0	0	0	0	0	0	7.17102e-09	0	0	0	0	0
1830.7	8.03223	0	0	0	0	0	0	0	0	0	0	0	0	0	0	0	0	0
1839.12	8.03584	0	0	0	0	0	0	0	0	0	0	0	0	0	0	0	0	0
1847.54	8.03945	0	0	0	0	0	0	0	0	0	0	0	0	0	0	0	0	0
1855.96	8.04306	0	0	0	0	0	0	0	0	0	0	0	0	0	0	0	0	0
1864.38	8.04667	0	0	2.91751e-08	5.7109e-08	2.92836e-08	3.45142e-08	0	2.95537e-08	3.9693e-08	1.04345e-07	0	5.6422e-08	1.49058e-08	6.48409e-08	4.53806e-08	0	6.39845e-09
1872.79	8.05029	3.59742e-06	3.51626e-06	3.44828e-06	3.45807e-06	3.47784e-06	3.46854e-06	3.40173e-06	3.33691e-06	3.39248e-06	3.46374e-06	3.46528e-06	3.38626e-06	3.43429e-06	3.4731e-06	3.40263e-06	3.26605e-06	3.13443e-06
1881.21	8.0539	6.10738e-05	3.97506e-05	3.97212e-05	3.95715e-05	3.95466e-05	3.94698e-05	3.93504e-05	3.91611e-05	3.89421e-05	3.8783e-05	3.82853e-05	3.77922e-05	3.70968e-05	3.60662e-05	3.37866e-05	3.08236e-05	2.83377e-05
1889.63	8.05751	1.50403e-05	9.05573e-06	9.07467e-06	9.02089e-06	8.97993e-06	8.977e-06	8.95676e-06	8.84254e-06	8.76167e-06	8.77943e-06	8.54483e-06	8.37668e-06	8.13016e-06	7.82474e-06	7.06116e-06	6.33839e-06	5.55904e-06
1898.05	8.06112	2.99271e-06	1.45834e-06	1.4681e-06	1.47343e-06	1.43707e-06	1.4052e-06	1.46558e-06	1.42809e-06	1.41873e-06	1.42764e-06	1.40421e-06	1.30987e-06	1.3406e-06	1.13479e-06	1.15218e-06	8.99814e-07	6.66391e-07
1906.47	8.06473	9.81787e-07	3.94261e-07	4.16495e-07	5.79223e-07	4.38071e-07	4.6442e-07	4.78083e-07	5.18623e-07	4.3053e-07	4.59647e-07	4.14926e-07	3.78958e-07	5.11205e-07	4.36325e-07	4.64592e-07	3.33171e-07	3.62453e-07
1914.89	8.06834	5.15753e-07	2.55377e-07	2.62535e-07	2.08581e-07	3.9375e-07	2.78445e-07	2.48378e-07	1.96225e-07	2.57839e-07	3.09065e-07	2.70137e-07	1.80592e-07	2.19107e-07	2.24339e-07	2.69916e-07	1.39187e-07	1.59825e-07
1923.31	8.07196	5.4943e-07	2.4558e-07	3.0698e-07	3.22608e-07	3.6132e-07	3.12613e-07	2.58863e-07	2.94079e-07	3.07404e-07	3.29948e-07	2.17285e-07	2.69314e-07	3.21635e-07	2.05421e-07	1.91322e-07	1.56677e-07	6.48513e-08
1931.73	8.07557	2.39344e-06	1.02577e-06	1.00875e-06	9.54934e-07	9.87081e-07	9.76781e-07	9.36772e-07	9.29299e-07	8.93025e-07	8.79301e-07	7.72856e-07	7.99914e-07	7.93155e-07	6.7893e-07	6.65924e-07	5.12944e-07	3.72542e-07
1940.15	8.07918	0.000145257	7.40803e-05	7.33321e-05	7.24656e-05	7.17222e-05	7.0903e-05	7.00809e-05	6.8473e-05	6.68641e-05	6.52022e-05	6.20268e-05	5.88086e-05	5.55888e-05	5.0768e-05	4.20621e-05	3.34537e-05	2.68316e-05
1948.57	8.08279	0.00072225	0.000497051	0.000493798	0.000490558	0.00048725	0.000483971	0.00048064	0.000473955	0.000467139	0.000460187	0.000446012	0.000431364	0.000416472	0.000392561	0.000346305	0.000294663	0.000251608
1956.99	8.0864	0.00155175	0.00112171	0.00111574	0.00110961	0.00110341	0.00109718	0.00109083	0.00107787	0.0010647	0.00105112	0.00102283	0.00099291	0.000961819	0.000910769	0.000809473	0.000693103	0.000597096
1965.41	8.09001	0.00114846	0.00085705	0.000851589	0.000846058	0.000840503	0.000834932	0.000829322	0.000818003	0.000806542	0.00079498	0.000771326	0.00074696	0.000722389	0.000682716	0.000605175	0.000517408	0.000442503
1973.83	8.09363	0.000352934	0.000274771	0.000273012	0.000271386	0.00026958	0.000267816	0.000266033	0.000262566	0.000258943	0.000255316	0.000247996	0.000240509	0.000233032	0.000221066	0.000197513	0.000170611	0.000146543
1982.25	8.09724	6.29382e-05	4.89157e-05	4.85135e-05	4.81674e-05	4.78952e-05	4.75838e-05	4.71111e-05	4.64697e-05	4.57646e-05	4.50815e-05	4.36317e-05	4.22077e-05	4.0756e-05	3.85082e-05	3.4011e-05	2.89103e-05	2.43822e-05
1990.67	8.10085	5.32256e-05	4.15041e-05	4.11885e-05	4.07707e-05	4.04634e-05	4.02261e-05	3.99075e-05	3.92804e-05	3.87795e-05	3.81825e-05	3.69941e-05	3.57695e-05	3.45991e-05	3.2689e-05	2.90036e-05	2.48359e-05	2.10487e-05
1999.09	8.10446	0.00123677	0.000994362	0.000989443	0.000984422	0.000979333	0.000974205	0.000969027	0.000958533	0.000947842	0.000936888	0.000914337	0.000890596	0.000866061	0.000825504	0.000742857	0.000643823	0.000557882
2007.5	8.10807	0.00278728	0.00205389	0.00204109	0.00202823	0.00201523	0.00200212	0.00198888	0.0019622	0.00193496	0.00190718	0.00185015	0.00179055	0.00172885	0.00162843	0.00143071	0.00120548	0.00102526
2015.92	8.11168	0.00277448	0.00192328	0.00190891	0.00189446	0.00187987	0.00186543	0.00185075	0.00182129	0.00179158	0.00176156	0.00170032	0.00163748	0.00157357	0.00147122	0.00127455	0.00105708	0.000883583
2024.34	8.1153	0.000828655	0.000628307	0.000623705	0.000619108	0.000614444	0.000609807	0.000605177	0.000595887	0.000586558	0.0005772	0.000558308	0.000539033	0.000520025	0.000489618	0.000430473	0.000363867	0.000305783
2032.76	8.11891	0.000300758	0.000235172	0.000233655	0.000231886	0.000230341	0.000228569	0.000226904	0.000223561	0.000220201	0.00021681	0.000210043	0.000203131	0.000196353	0.000185497	0.000164154	0.000139865	0.00011777
2041.18	8.12252	0.000306407	0.000251587	0.000250173	0.000248791	0.000247425	0.000246029	0.000244594	0.000241766	0.000238905	0.000236008	0.000230136	0.000224071	0.000218057	0.000208259	0.000188403	0.000164792	0.000142714
2049.6	8.12613	0.000725177	0.000577227	0.000573736	0.000570085	0.000566511	0.000562915	0.000559299	0.000552037	0.000544672	0.000537278	0.000522203	0.000506702	0.000491291	0.000466353	0.000416256	0.000357599	0.000304731
2058.02	8.12974	0.000820586	0.000660037	0.000656165	0.000652258	0.000648412	0.000644528	0.000640572	0.000632728	0.000624779	0.00061672	0.000600262	0.000583316	0.00056634	0.000538738	0.000482735	0.000416145	0.00035615
2066.44	8.13335	0.000904521	0.000706297	0.000701612	0.000696958	0.000692265	0.000687594	0.00068288	0.000673401	0.00066392	0.000654306	0.000634892	0.000615002	0.000595201	0.000563359	0.000499861	0.000426009	0.000360425
2074.86	8.13697	0.000587222	0.000461465	0.000458374	0.000455318	0.000452172	0.000449066	0.000445944	0.000439709	0.000433405	0.000427058	0.000414239	0.000401078	0.00038814	0.00036723	0.000325658	0.000277252	0.000233634
2083.28	8.14058	0.000314369	0.000246405	0.000244748	0.000242999	0.000241216	0.000239466	0.000237718	0.000234223	0.000230681	0.000227141	0.000220021	0.000212761	0.00020566	0.000194261	0.000171725	0.000145855	0.000121958
2091.7	8.14419	0.000187705	0.00014529	0.000144231	0.000143049	0.000141957	0.000140865	0.000139772	0.000137535	0.000135348	0.000133125	0.00012867	0.00012418	0.000119759	0.000112771	9.90405e-05	8.34438e-05	6.92394e-05
2100.12	8.1478	6.5541e-05	5.18753e-05	5.15012e-05	5.12426e-05	5.07601e-05	5.03928e-05	5.00367e-05	4.93271e-05	4.86008e-05	4.78844e-05	4.64111e-05	4.49462e-05	4.35261e-05	4.11497e-05	3.65917e-05	3.12986e-05	2.62644e-05
2108.54	8.4804	2.64314e-05	2.16327e-05	2.14046e-05	2.11216e-05	2.10585e-05	2.09311e-05	2.07999e-05	2.0538e-05	2.02745e-05	2.00005e-05	1.94569e-05	1.88992e-05	1.83519e-05	1.74448e-05	1.5681e-05	1.35851e-05	1.15193e-05
2116.97	8.023	1.87697e-05	1.51122e-05	1.49571e-05	1.4881e-05	1.48786e-05	1.47749e-05	1.46776e-05	1.44703e-05	1.42796e-05	1.40692e-05	1.36834e-05	1.32509e-05	1.28377e-05	1.22379e-05	1.08864e-05	9.43565e-06	8.09412e-06
2125.41	8.476	3.03006e-06	2.22046e-06	2.29354e-06	2.33139e-06	2.24643e-06	2.2203e-06	2.20236e-06	2.15292e-06	2.13963e-06	2.10356e-06	2.02798e-06	2.01428e-06	1.94537e-06	1.85458e-06	1.63982e-06	1.30427e-06	1.10221e-06
2134.3	8.38695	1.7291e-06	1.41747e-06	1.31218e-06	1.22327e-06	1.30242e-06	1.29466e-06	1.29199e-06	1.27432e-06	1.25697e-06	1.22941e-06	1.17739e-06	1.14054e-06	1.1105e-06	1.00972e-06	9.15171e-07	7.90232e-07	7.97333e-07
2142.31	8.12115	2.69709e-06	2.22346e-06	2.0356e-06	2.06985e-06	2.05711e-06	2.02512e-06	2.02765e-06	1.98383e-06	1.95775e-06	1.92854e-06	1.87251e-06	1.82751e-06	1.7571e-06	1.71827e-06	1.62071e-06	1.4234e-06	1.09882e-06
2150.88	8.16947	1.94205e-05	1.64619e-05	1.62514e-05	1.61752e-05	1.61082e-05	1.6019e-05	1.59329e-05	1.57604e-05	1.5583e-05	1.54194e-05	1.51095e-05	1.4739e-05	1.43816e-05	1.38072e-05	1.25292e-05	1.09768e-05	9.61017e-06
2159.31	8.17308	1.25032e-05	1.0597e-05	1.05382e-05	1.0474e-05	1.04161e-05	1.03529e-05	1.03e-05	1.01996e-05	1.00816e-05	9.98101e-06	9.74689e-06	9.54845e-06	9.28024e-06	8.9328e-06	8.17643e-06	7.25266e-06	6.20651e-06
2167.73	8.1767	8.88227e-06	7.24298e-06	7.22406e-06	7.16493e-06	7.13352e-06	7.08206e-06	7.04557e-06	6.93478e-06	6.86252e-06	6.75485e-06	6.61537e-06	6.41504e-06	6.23281e-06	5.90414e-06	5.38538e-06	4.56843e-06	3.95049e-06
2176.16	8.18031	2.4534e-06	1.92175e-06	1.93745e-06	1.90956e-06	1.90882e-06	1.89024e-06	1.86389e-06	1.83096e-06	1.81932e-06	1.79788e-06	1.7332e-06	1.69954e-06	1.66268e-06	1.59731e-06	1.40897e-06	1.24001e-06	1.01643e-06
2184.59	8.18392	6.62135e-07	5.35559e-07	5.33803e-07	5.28445e-07	5.25283e-07	5.135e-07	5.17193e-07	5.13579e-07	5.01695e-07	4.82315e-07	4.6455e-07	4.69291e-07	4.79034e-07	4.18208e-07	3.68598e-07	3.08686e-07	2.69404e-07
2193.01	8.18753	6.40937e-07	5.43705e-07	5.18939e-07	5.20704e-07	5.3525e-07	5.17897e-07	5.06399e-07	5.24621e-07	4.79738e-07	5.06855e-07	4.7718e-07	4.79117e-07	4.36691e-07	4.16558e-07	3.37423e-07	2.24295e-07	2.26833e-07
2201.44	8.19114	1.08011e-07	1.09225e-07	8.73e-08	4.65981e-08	3.09074e-08	9.39494e-08	6.67613e-08	7.8762e-08	6.99542e-08	5.38254e-08	4.60204e-08	7.90961e-08	4.83084e-08	3.50979e-08	1.55755e-07	1.46524e-07	3.68325e-08
2209.87	8.19475	3.11667e-07	2.39091e-07	2.29718e-07	2.19662e-07	2.34102e-07	2.17141e-07	2.26963e-07	2.2281e-07	2.05867e-07	2.02386e-07	2.19397e-07	2.14126e-07	2.05451e-07	1.52935e-07	2.16144e-07	7.90585e-08	1.56623e-07
2218.3	8.19837	2.18103e-07	1.29343e-07	1.29945e-07	1.41779e-07	1.5092e-07	1.4401e-07	1.45653e-07	1.31871e-07	1.1646e-07	1.09994e-07	9.92267e-08	1.80735e-07	1.41671e-07	9.21191e-08	5.25772e-08	2.29959e-08	4.78909e-08
2226.72	8.20198	1.80829e-07	1.72848e-07	1.57139e-07	1.62062e-07	1.55547e-07	1.53529e-07	1.66161e-07	1.49095e-07	1.33338e-07	1.86518e-07	1.53362e-07	1.68316e-07	1.35266e-07	9.17301e-08	4.15675e-08	1.13448e-07	1.20735e-07
2235.15	8.20559	4.62948e-08	5.90334e-08	5.34656e-08	3.07981e-08	5.62097e-08	3.59644e-08	4.89949e-08	4.04e-08	1.97689e-08	4.20549e-08	1.60473e-08	5.75169e-08	1.15732e-08	5.08347e-08	6.34876e-08	-2.66266e-23	3.20757e-08
2243.58	8.2092	3.48912e-08	1.56673e-08	5.76288e-08	4.08723e-08	4.82834e-08	4.82394e-08	2.13467e-08	5.93469e-08	3.62798e-08	4.77112e-08	5.38173e-08	2.74226e-08	8.32249e-09	2.612e-08	3.60409e-08	5.12082e-08	1.22514e-08
2252.01	8.21281	2.06417e-07	1.63853e-07	1.758e-07	1.45804e-07	1.64316e-07	1.71193e-07	1.57686e-07	1.56683e-07	1.52089e-07	1.35146e-07	1.61021e-07	1.15817e-07	1.15849e-07	1.01561e-07	1.50232e-07	1.36418e-07	8.03627e-08
2260.43	8.21642	8.13861e-08	9.64601e-08	9.66799e-08	1.18504e-07	1.12421e-07	9.60786e-08	1.48551e-07	1.02618e-07	1.06555e-07	1.34861e-07	7.85063e-08	7.73792e-08	1.37402e-07	5.59055e-08	0	3.20651e-08	7.51688e-08
2268.86	8.22004	8.41396e-24	4.4077e-08	2.72068e-08	2.1928e-08	1.25514e-08	2.79821e-08	1.17089e-08	3.82551e-08	3.58786e-08	2.65074e-08	0	5.76756e-08	6.19965e-08	2.784e-08	4.21805e-08	6.52471e-08	4.36321e-08
2277.29	8.22365	1.47595e-07	6.27495e-08	6.42656e-08	8.256e-08	4.78182e-08	5.38654e-08	8.94496e-08	6.12309e-08	6.79596e-08	5.58073e-08	3.98411e-08	6.20252e-08	1.17246e-07	1.22282e-07	2.60332e-08	4.25794e-09	4.28449e-08
2285.71	8.22726	0	1.63784e-08	6.40562e-09	3.37191e-08	6.94565e-09	5.34518e-09	2.66216e-08	6.46591e-09	0	5.09245e-09	1.69433e-08	1.8162e-08	1.92656e-08	0	0	-3.23962e-08	1.15499e-08
2294.14	8.23087	0	1.34175e-08	2.92366e-09	1.02043e-08	1.54715e-08	1.78887e-08	4.32513e-08	1.16143e-08	8.22212e-09	0	2.48644e-08	0	7.8813e-09	0	0	0	0
2302.57	8.23448	0	3.71039e-24	0	0	0	6.49681e-09	1.87056e-08	-2.55095e-09	8.36074e-09	0	0	0	3.91207e-08	0	0	0	1.36311e-08
2311	8.23809	0	6.33673e-09	0	1.61881e-08	0	3.4488e-24	0	1.25708e-08	0	0	8.82939e-09	0	0	0	0	0	0
2319.42	8.24171	0	0	0	0	0	0	0	0	0	1.67222e-08	-5.06717e-09	0	0	0	0	0	7.84702e-09
2327.85	8.24532	0	0	0	5.81987e-09	0	9.35459e-09	0	0	0	0	0	0	1.03828e-08	0	0	0	0
2336.28	8.24893	0	0	6.91671e-09	0	0	0	0	0	0	0	-1.65227e-08	0	0	0	0	-1.27745e-08	0
2344.71	8.25254	0	0	0	0	0	0	0	0	0	1.67173e-08	0	0	0	0	0	1.33267e-08	0
2353.13	8.25615	0	0	6.28063e-09	0	0	0	0	0	0	0	0	0	0	0	0	0	0
2361.56	8.25976	0	-1.93062e-09	9.93224e-10	0	-9.97677e-09	0	0	0	1.19469e-08	0	2.52176e-08	2.80171e-08	0	0	0	9.91647e-09	0
2369.99	8.26338	0	0	0	1.42196e-08	0	4.50878e-08	2.41868e-08	0	0	0	0	0	0	0	0	0	0
2378.41	8.26699	0	0	0	-2.76231e-24	-3.44647e-09	2.36322e-09	0	0	0	-8.70948e-09	0	0	0	0	0	3.58782e-09	0
2386.84	8.2706	0	0	0	0	0	2.51798e-09	0	0	1.99174e-08	-2.31833e-08	0	0	0	0	0	1.96566e-08	2.2661e-08
2395.27	8.27421	0	0	-1.30149e-08	0	0	0	0	0	3.07473e-08	-2.23835e-08	-2.53957e-08	0	0	0	4.29804e-08	6.19269e-09	0
2403.7	8.27782	0	0	0	8.65577e-09	4.65295e-09	0	0	0	0	0	0	0	2.25057e-08	0	0	-1.32301e-08	0
2412.12	8.28143	0	1.45363e-08	-8.52886e-09	2.82659e-09	4.86125e-09	0	9.90565e-09	0	0	0	0	0	0	0	0	-3.03761e-09	0
2420.55	8.28505	0	0	0	0	-2.5188e-09	0	1.83549e-08	0	0	0	0	0	0	0	0	-3.88581e-09	0
2428.98	8.28866	0	9.46862e-09	0	1.86729e-08	0	0	0	0	0	9.74349e-09	-5.9579e-09	0	0	0	0	-4.53007e-09	0
2437.41	8.29227	2.0996e-08	0	1.08779e-08	0	1.01578e-23	0	1.20924e-08	2.4712e-09	2.84708e-08	0	3.62846e-08	0	0	1.66181e-08	8.62108e-09	-1.19399e-08	0
2445.83	8.29588	2.10085e-09	-9.91085e-25	0	0	0	0	0	0	0	0	0	2.92773e-09	4.46401e-08	0	0	0	2.56059e-08
2454.26	8.29949	3.77337e-08	0	0	0	0	0	0	0	0	3.83363e-08	0	0	3.61407e-08	1.52624e-08	0	-1.15961e-08	0
2462.69	8.3031	2.55494e-08	1.17414e-08	0	1.06511e-08	0	2.68091e-08	0	7.20115e-08	0	0	1.43242e-08	0	2.50825e-08	0	0	2.03263e-08	-1.19351e-08
2471.11	8.30672	1.29207e-07	1.27329e-07	1.31112e-08	2.52393e-08	3.43716e-08	6.15212e-08	7.0695e-08	6.10656e-08	8.66511e-08	2.95749e-08	2.76559e-08	5.02169e-08	3.60942e-08	3.01281e-08	0	9.15529e-24	5.81151e-08
2479.54	8.31033	5.16113e-07	3.58529e-07	3.38724e-07	3.59341e-07	3.81573e-07	3.37785e-07	3.64373e-07	2.97074e-07	3.39676e-07	3.09999e-07	2.75718e-07	3.18992e-07	2.91735e-07	3.18882e-07	1.79671e-07	1.85921e-07	1.24225e-07
2487.97	8.31394	5.01431e-06	3.52266e-06	3.43417e-06	3.45379e-06	3.30418e-06	3.36986e-06	3.35836e-06	3.25444e-06	3.30083e-06	3.17753e-06	3.08558e-06	2.91963e-06	2.84368e-06	2.83199e-06	2.40497e-06	1.94272e-06	1.57857e-06
2496.4	8.31755	1.7435e-06	1.35864e-06	1.38984e-06	1.29531e-06	1.30466e-06	1.34732e-06	1.26696e-06	1.28153e-06	1.29844e-06	1.19049e-06	1.17431e-06	1.23624e-06	1.1404e-06	1.09044e-06	9.01068e-07	7.47384e-07	6.09653e-07
2504.82	8.32116	1.25423e-06	9.69354e-07	9.28195e-07	8.77141e-07	8.80344e-07	9.16594e-07	8.72198e-07	8.71382e-07	8.58816e-07	9.38816e-07	8.72381e-07	8.12329e-07	8.03864e-07	6.37937e-07	7.32891e-07	5.57051e-07	4.67899e-07
2513.25	8.32477	1.74004e-06	1.02875e-06	1.07823e-06	1.16028e-06	9.65966e-07	1.08366e-06	1.11578e-06	1.00124e-06	1.07167e-06	9.29551e-07	8.97826e-07	1.05229e-06	7.82263e-07	1.12399e-06	8.37892e-07	6.98807e-07	6.34063e-07

## Sheet: k_EMIT
Wavelength	FWHM	k_Summer_L	k_Summer_M	k_Summer_H	k_Winter_L	k_Winter_M	k_Winter_H	k_1976_L	k_1976_M	k_1976_H
1006.83	8.529	0	0	0	0	0	0	0	0	0	0	0	0	0	0	0	0	0
1014.29	8.53	0	0	0	0	0	0	0	0	0	0	0	0	0	0	0	0	0
1021.76	8.531	0	0	0	0	0	0	0	0	0	0	0	0	0	0	0	0	0
1029.22	8.533	0	0	0	0	0	0	0	0	0	0	0	0	0	0	0	0	0
1036.68	8.534	5.46491e-07	4.11521e-07	4.11489e-07	4.19506e-07	4.04152e-07	4.0293e-07	3.9654e-07	3.84584e-07	3.84323e-07	3.795e-07	3.75981e-07	3.55876e-07	3.36949e-07	3.37005e-07	2.96113e-07	2.75071e-07	2.62234e-07
1044.14	8.536	1.24389e-07	9.11571e-08	9.13068e-08	8.78757e-08	1.00356e-07	8.55538e-08	8.6516e-08	9.12016e-08	8.15247e-08	7.56402e-08	8.75528e-08	9.40443e-08	7.80018e-08	6.88083e-08	7.72196e-08	4.95947e-08	5.88473e-08
1051.6	8.537	1.57644e-06	1.21009e-06	1.20027e-06	1.20393e-06	1.17128e-06	1.18656e-06	1.15683e-06	1.16522e-06	1.15141e-06	1.14434e-06	1.10186e-06	1.07607e-06	1.0343e-06	9.77597e-07	9.01988e-07	8.01268e-07	7.10623e-07
1059.06	8.538	1.26599e-07	7.29886e-08	7.28453e-08	7.48232e-08	8.88917e-08	7.9507e-08	7.23196e-08	7.50266e-08	9.50824e-08	7.26736e-08	8.51133e-08	6.82385e-08	7.70157e-08	5.17885e-08	4.74258e-08	4.7899e-08	5.30988e-08
1066.52	8.54	2.92128e-07	2.27397e-07	2.33854e-07	2.20224e-07	2.15827e-07	2.30787e-07	2.15008e-07	2.17579e-07	2.11191e-07	2.20578e-07	1.8883e-07	1.97864e-07	1.79049e-07	1.63646e-07	1.83427e-07	1.55313e-07	1.26409e-07
1073.98	8.541	3.19965e-08	3.37268e-08	3.8624e-08	4.73337e-08	2.63524e-08	3.25181e-08	2.27143e-08	4.33676e-08	2.99496e-08	3.62753e-08	5.0716e-08	4.14702e-08	1.15519e-08	1.18244e-08	1.75193e-08	2.07189e-08	3.87186e-08
1081.44	8.543	1.14123e-08	7.86943e-25	-1.04901e-25	4.15466e-09	6.6107e-09	4.52563e-09	2.36963e-09	7.29765e-09	0	5.40648e-09	6.19344e-09	1.15601e-08	0	0	2.82827e-09	-6.66159e-09	-1.20498e-08
1088.9	8.544	0	2.59278e-09	0	0	0	0	0	3.99112e-09	0	-6.73582e-10	0	0	0	0	0	0	0
1096.36	8.545	0	0	0	0	0	-1.13334e-09	3.9597e-09	7.42473e-09	0	5.19298e-09	0	0	0	0	0	0	0
1103.82	8.547	0	0	0	0	0	0	0	1.49099e-09	0	0	0	0	0	0	0	0	0
1111.28	8.548	0	0	0	0	1.33045e-24	0	3.03322e-09	0	0	0	0	0	0	0	0	0	0
1118.74	8.55	0	0	0	0	9.13721e-25	0	0	0	7.99131e-10	-2.67895e-09	0	0	0	0	7.38223e-09	0	7.50965e-09
1126.2	8.551	0	0	0	2.46803e-09	0	0	0	0	0	0	0	0	0	0	0	0	0
1133.66	8.552	0	0	0	1.07731e-24	0	0	0	7.79896e-09	0	0	7.75558e-09	0	1.08144e-24	0	0	0	9.10243e-10
1141.11	8.554	0	0	0	0	0	0	0	0	0	0	0	0	0	0	0	0	0
1148.57	8.555	0	3.8507e-09	0	0	0	0	0	0	0	0	0	0	0	0	0	0	0
1156.03	8.557	0	0	0	0	0	0	0	0	0	0	0	0	0	0	0	0	0
1163.49	8.558	0	0	0	0	-6.48645e-09	0	0	0	0	0	0	0	0	0	0	0	0
1170.95	8.559	0	0	0	0	0	0	0	0	0	0	0	7.57158e-09	0	0	0	0	0
1178.4	8.561	0	0	0	0	0	0	0	0	0	0	0	0	0	0	0	0	0
1185.86	8.562	0	0	0	0	0	0	0	0	0	0	0	0	0	0	0	0	0
1193.32	8.564	0	0	0	0	0	0	0	0	0	0	0	0	0	0	0	0	0
1200.78	8.565	1.45157e-05	1.15124e-05	1.1445e-05	1.13829e-05	1.13343e-05	1.12563e-05	1.11887e-05	1.10513e-05	1.0924e-05	1.07988e-05	1.05293e-05	1.02521e-05	1.00074e-05	9.58301e-06	8.8306e-06	8.02671e-06	7.32633e-06
1208.23	8.566	3.36145e-05	2.65407e-05	2.63878e-05	2.62467e-05	2.61004e-05	2.59478e-05	2.57738e-05	2.54772e-05	2.51236e-05	2.48292e-05	2.4174e-05	2.35506e-05	2.28895e-05	2.19338e-05	2.01126e-05	1.83499e-05	1.66521e-05
1215.69	8.568	1.33234e-05	1.02093e-05	1.01391e-05	1.00547e-05	9.98884e-06	9.94931e-06	9.87768e-06	9.74899e-06	9.58354e-06	9.47216e-06	9.2011e-06	8.95098e-06	8.6488e-06	8.31104e-06	7.52264e-06	6.81046e-06	6.04966e-06
1223.15	8.569	2.2679e-05	1.78649e-05	1.77484e-05	1.76358e-05	1.75159e-05	1.7438e-05	1.73197e-05	1.70846e-05	1.68778e-05	1.66947e-05	1.62143e-05	1.57951e-05	1.5348e-05	1.46853e-05	1.34821e-05	1.22502e-05	1.10866e-05
1230.6	8.571	2.6835e-06	1.95461e-06	1.94583e-06	1.91698e-06	1.89997e-06	1.90206e-06	1.87143e-06	1.84798e-06	1.79727e-06	1.79101e-06	1.70139e-06	1.63275e-06	1.5597e-06	1.48384e-06	1.31771e-06	1.21396e-06	1.03179e-06
1238.06	8.572	8.53293e-07	6.48374e-07	6.32226e-07	6.50428e-07	6.53486e-07	6.36972e-07	6.52921e-07	6.38283e-07	6.29451e-07	6.22031e-07	5.92341e-07	5.63253e-07	5.56074e-07	5.24299e-07	4.90352e-07	3.63922e-07	3.17645e-07
1245.52	8.573	6.32286e-08	3.11827e-08	1.78775e-08	3.55758e-08	4.18274e-08	3.85548e-08	5.47761e-08	3.34122e-08	3.63904e-08	3.00946e-08	3.09382e-08	3.73696e-08	3.8479e-08	5.29563e-08	1.79975e-08	9.50661e-09	5.69035e-08
1252.97	8.575	2.25598e-07	1.69222e-07	1.87165e-07	1.74431e-07	1.70315e-07	1.72538e-07	1.91794e-07	1.93776e-07	1.752e-07	1.48539e-07	1.61212e-07	1.71458e-07	1.39498e-07	2.087e-07	2.50401e-07	1.8957e-07	1.01546e-07
1260.43	8.576	2.2157e-07	1.45793e-07	1.78883e-07	1.52769e-07	1.4514e-07	1.50634e-07	1.46627e-07	1.83278e-07	1.34966e-07	1.81077e-07	1.51728e-07	1.9043e-07	1.15991e-07	1.78821e-07	4.45279e-08	1.60101e-07	7.59341e-08
1267.88	8.578	1.46961e-07	1.20521e-07	1.20083e-07	1.45079e-07	9.39879e-08	1.07216e-07	1.18292e-07	9.623e-08	1.3127e-07	1.12678e-07	8.8274e-08	9.12371e-08	1.15334e-07	1.17108e-07	4.12134e-08	1.89848e-08	8.66423e-08
1275.34	8.579	0	-6.63947e-09	6.22226e-09	1.39497e-09	1.93734e-24	3.57914e-09	5.48957e-09	-3.11778e-09	0	0	0	0	0	0	0	0	-7.96578e-10
1282.79	8.58	3.57794e-08	2.05209e-08	2.83553e-08	2.46693e-08	2.0159e-08	2.68537e-08	4.08802e-08	1.73777e-08	3.58418e-08	3.10585e-08	3.07491e-08	3.50184e-08	6.67757e-09	2.18954e-08	2.48517e-24	0	1.03404e-08
1290.25	8.582	2.01479e-06	1.59965e-06	1.60308e-06	1.54574e-06	1.54208e-06	1.55274e-06	1.533e-06	1.53651e-06	1.518e-06	1.5181e-06	1.43752e-06	1.4096e-06	1.37391e-06	1.30432e-06	1.19502e-06	1.08091e-06	9.5868e-07
1297.71	8.583	1.13086e-06	8.89206e-07	8.95041e-07	8.53441e-07	8.8687e-07	8.78156e-07	8.9516e-07	8.55795e-07	8.56158e-07	8.15814e-07	8.44075e-07	8.05764e-07	7.89756e-07	7.6393e-07	6.63461e-07	5.88423e-07	5.55612e-07
1305.16	8.585	1.32168e-08	4.66558e-09	1.21927e-09	8.59451e-09	2.02179e-08	2.17154e-08	2.38424e-24	-8.96652e-10	3.9554e-09	1.43973e-08	1.18742e-08	-7.28802e-10	5.86873e-09	0	0	0	-1.05296e-09
1312.61	8.586	4.85499e-06	3.8337e-06	3.78116e-06	3.76313e-06	3.75245e-06	3.73152e-06	3.69242e-06	3.65784e-06	3.6065e-06	3.5525e-06	3.4753e-06	3.41356e-06	3.29798e-06	3.14194e-06	2.89869e-06	2.62275e-06	2.36103e-06
1320.07	8.587	5.74063e-06	4.42096e-06	4.41869e-06	4.37117e-06	4.35463e-06	4.32688e-06	4.28162e-06	4.23293e-06	4.17208e-06	4.11354e-06	4.02006e-06	3.90192e-06	3.80514e-06	3.56837e-06	3.2463e-06	2.88826e-06	2.68973e-06
1327.52	8.589	2.02044e-07	1.17818e-07	1.381e-07	1.18774e-07	1.15426e-07	1.28019e-07	1.29373e-07	1.26446e-07	9.61963e-08	1.05883e-07	9.18246e-08	1.26178e-07	8.51075e-08	9.91001e-08	7.48628e-08	5.4476e-08	5.64167e-08
1334.98	8.59	1.6803e-06	1.29483e-06	1.31048e-06	1.27414e-06	1.30304e-06	1.258e-06	1.21339e-06	1.25894e-06	1.24809e-06	1.18692e-06	1.17498e-06	1.09717e-06	1.08039e-06	1.09686e-06	1.05824e-06	9.06398e-07	7.9565e-07
1342.43	8.592	3.20694e-06	2.3676e-06	2.37331e-06	2.3567e-06	2.32234e-06	2.31686e-06	2.29723e-06	2.26653e-06	2.226e-06	2.18898e-06	2.15662e-06	2.09226e-06	2.00738e-06	1.94374e-06	1.78624e-06	1.60505e-06	1.4285e-06
1349.88	8.593	5.55737e-07	2.65426e-07	2.43598e-07	3.09107e-07	2.2342e-07	2.26204e-07	3.17378e-07	2.98806e-07	2.86691e-07	1.69493e-07	1.99643e-07	2.50428e-07	1.87246e-07	1.43564e-07	1.7603e-07	1.33488e-07	1.24191e-07
1357.34	8.594	2.12747e-08	1.33804e-08	1.9066e-08	1.75626e-08	1.65313e-08	2.07895e-08	1.7768e-08	1.11717e-08	7.29168e-09	1.68927e-08	5.49162e-09	4.36548e-08	1.51991e-08	7.11295e-09	2.55e-08	1.0479e-08	1.87194e-24
1364.79	8.596	1.73566e-08	2.65763e-08	2.64939e-08	1.51352e-08	3.23611e-08	1.87161e-08	1.78157e-08	2.69858e-08	1.91186e-08	2.11397e-08	2.27673e-08	4.1378e-08	4.43549e-08	1.45643e-08	3.07183e-08	3.93764e-08	2.56638e-08
1372.24	8.597	2.73788e-07	1.62139e-07	1.51856e-07	1.40645e-07	1.13541e-07	2.10837e-07	1.5028e-07	2.25745e-07	1.56533e-07	1.75877e-07	1.59887e-07	1.42634e-07	1.22594e-07	1.44487e-07	1.66341e-07	1.47256e-07	1.58083e-07
1379.69	8.599	1.27918e-07	1.20203e-07	6.92565e-08	5.26129e-08	6.39314e-08	6.17549e-08	4.71311e-08	1.41215e-07	6.75884e-08	5.99932e-08	9.60513e-08	2.19222e-08	2.56502e-08	6.55356e-08	6.49882e-08	4.23677e-08	4.79618e-08
1387.14	8.6	2.61968e-09	0	4.0972e-09	0	6.35838e-09	5.75959e-09	6.73954e-09	2.55993e-09	0	6.73163e-09	6.43498e-09	9.23942e-09	0	2.85661e-09	1.49942e-08	5.81352e-09	1.18478e-08
1394.59	8.601	0	0	2.44672e-09	2.37073e-09	0	2.46589e-09	4.06725e-09	4.57104e-09	3.55688e-10	0	3.2785e-09	0	0	0	0	0	1.01975e-08
1402.04	8.603	0	0	2.36974e-08	0	0	0	-5.73906e-09	2.94557e-09	2.06265e-09	0	-7.64297e-25	0	3.22115e-09	0	6.81608e-09	0	2.64094e-09
1409.49	8.604	1.76815e-10	0	3.27962e-09	2.79921e-08	0	0	0	0	0	0	0	0	-1.9587e-08	0	0	0	0
1416.94	8.606	0	0	0	2.221e-08	0	0	0	0	2.24764e-09	0	1.39209e-09	0	-2.03632e-08	0	0	0	0
1424.39	8.607	3.43776e-08	4.09607e-09	1.08975e-08	4.00498e-08	2.59059e-08	4.51253e-09	5.63031e-08	2.85575e-08	4.62574e-09	7.77763e-09	2.94056e-08	4.47686e-08	6.23175e-09	3.40639e-08	2.89553e-09	2.32995e-08	5.25906e-09
1431.84	8.608	0.000205511	0.000178988	0.000178678	0.000178274	0.000177927	0.000177573	0.000177206	0.000176371	0.000175574	0.00017465	0.000172633	0.000170516	0.00016817	0.000164111	0.000155681	0.00014577	0.000135856
1439.29	8.61	0.000249249	0.000175555	0.000174635	0.000173704	0.000172776	0.000171699	0.000170875	0.000168868	0.000166938	0.00016486	0.000160691	0.000156406	0.000152082	0.000145186	0.000132679	0.000119665	0.000107787
1446.74	8.611	6.30358e-05	4.20036e-05	4.17343e-05	4.14134e-05	4.11657e-05	4.07961e-05	4.0479e-05	3.98645e-05	3.9302e-05	3.85959e-05	3.73202e-05	3.5996e-05	3.47297e-05	3.28035e-05	2.92145e-05	2.56974e-05	2.26618e-05
1454.19	8.613	3.48501e-06	2.41845e-06	2.40476e-06	2.34213e-06	2.32863e-06	2.3782e-06	2.32202e-06	2.24975e-06	2.29241e-06	2.18263e-06	2.16043e-06	2.01109e-06	1.94585e-06	1.78365e-06	1.76065e-06	1.45063e-06	1.25903e-06
1461.64	8.614	2.84915e-07	1.21636e-07	1.93301e-07	1.74584e-07	1.42465e-07	1.38522e-07	1.81574e-07	1.24611e-07	1.14345e-07	1.14868e-07	1.40762e-07	1.64726e-07	1.07201e-07	6.94347e-08	1.20012e-07	7.45848e-08	6.19579e-08
1469.08	8.615	5.90224e-06	4.39273e-06	4.38636e-06	4.41949e-06	4.38663e-06	4.32342e-06	4.32312e-06	4.24454e-06	4.24744e-06	4.16991e-06	4.07722e-06	3.98124e-06	3.86044e-06	3.69967e-06	3.43323e-06	3.09744e-06	2.80639e-06
1476.53	8.617	1.06105e-05	8.61623e-06	8.59952e-06	8.56273e-06	8.53531e-06	8.47933e-06	8.48757e-06	8.36963e-06	8.32894e-06	8.21192e-06	8.05604e-06	7.91377e-06	7.76786e-06	7.41353e-06	6.93468e-06	6.43908e-06	5.89463e-06
1483.98	8.618	3.17219e-06	2.27026e-06	2.34262e-06	2.24798e-06	2.19181e-06	2.2317e-06	2.25196e-06	2.13695e-06	2.11985e-06	2.12771e-06	2.13506e-06	2.03211e-06	1.88436e-06	1.80145e-06	1.67939e-06	1.48676e-06	1.33083e-06
1491.43	8.62	1.6125e-06	1.20902e-06	1.17794e-06	1.21241e-06	1.17573e-06	1.18283e-06	1.17763e-06	1.15526e-06	1.19405e-06	1.11194e-06	1.01673e-06	9.96847e-07	9.44076e-07	9.5126e-07	8.82633e-07	7.64921e-07	6.90443e-07
1498.87	8.621	2.92157e-06	2.34284e-06	2.30412e-06	2.33826e-06	2.26259e-06	2.26781e-06	2.29426e-06	2.26616e-06	2.19747e-06	2.13684e-06	2.11817e-06	2.13431e-06	1.9484e-06	1.95574e-06	1.78208e-06	1.57653e-06	1.43196e-06
1506.32	8.622	6.52718e-08	6.27615e-08	6.19211e-08	4.4598e-08	6.19601e-08	5.10463e-08	7.8558e-08	2.719e-08	9.98926e-08	4.61533e-08	2.74059e-08	6.34367e-08	1.97934e-08	2.58106e-08	2.84589e-08	3.77242e-08	2.83066e-08
1513.76	8.624	2.08032e-08	1.34329e-08	1.15775e-24	3.25863e-08	2.90947e-08	1.70479e-08	8.74176e-09	0	0	1.54759e-08	3.56537e-08	1.53228e-24	1.70892e-08	1.42937e-08	4.86885e-10	6.13575e-09	-3.61773e-09
1521.21	8.625	6.36997e-07	4.8988e-07	4.21092e-07	4.31643e-07	4.39455e-07	4.09787e-07	4.59901e-07	4.28665e-07	3.70176e-07	3.76587e-07	4.03172e-07	3.17214e-07	3.33824e-07	3.28576e-07	2.27933e-07	2.45383e-07	2.16548e-07
1528.66	8.627	9.39946e-06	7.1439e-06	7.09394e-06	7.06697e-06	7.00547e-06	6.9859e-06	6.9077e-06	6.77722e-06	6.70535e-06	6.55719e-06	6.36615e-06	6.17612e-06	5.96714e-06	5.59067e-06	5.02528e-06	4.47329e-06	3.94064e-06
1536.1	8.628	3.90181e-05	3.1438e-05	3.12333e-05	3.11383e-05	3.08991e-05	3.07141e-05	3.05464e-05	3.0176e-05	2.97882e-05	2.94966e-05	2.86659e-05	2.79805e-05	2.71641e-05	2.59664e-05	2.38295e-05	2.15457e-05	1.94304e-05
1543.55	8.629	2.2209e-05	1.7732e-05	1.76241e-05	1.75492e-05	1.74369e-05	1.73175e-05	1.72249e-05	1.69934e-05	1.67837e-05	1.65889e-05	1.61018e-05	1.56711e-05	1.52613e-05	1.44624e-05	1.32601e-05	1.19526e-05	1.0721e-05
1550.99	8.631	4.53602e-07	3.78626e-07	3.35588e-07	3.57682e-07	2.63194e-07	3.41836e-07	3.65188e-07	2.25362e-07	2.86529e-07	3.11451e-07	3.35629e-07	3.97525e-07	3.14159e-07	3.17005e-07	2.2436e-07	1.89442e-07	1.8517e-07
1558.43	8.632	3.7533e-07	2.85505e-07	2.63277e-07	2.85747e-07	2.86791e-07	2.99331e-07	2.58232e-07	2.4784e-07	2.88259e-07	3.01306e-07	2.82353e-07	3.04817e-07	1.66575e-07	1.89468e-07	2.01651e-07	1.9631e-07	1.36038e-07
1565.88	8.634	2.63895e-05	1.97941e-05	1.96719e-05	1.94901e-05	1.93466e-05	1.92005e-05	1.90069e-05	1.87446e-05	1.84335e-05	1.80308e-05	1.75478e-05	1.68795e-05	1.62533e-05	1.54687e-05	1.36373e-05	1.19464e-05	1.04343e-05
1573.32	8.635	0.000213316	0.000169638	0.000168618	0.000167613	0.000166572	0.000165545	0.000164522	0.000162436	0.000160346	0.000158242	0.000154014	0.000149676	0.000145376	0.00013875	0.000126403	0.000113466	0.000101517
1580.76	8.636	0.000136875	0.000108889	0.000108222	0.00010755	0.000106892	0.000106259	0.000105574	0.000104266	0.000102905	0.000101465	9.87372e-05	9.59238e-05	9.32707e-05	8.87742e-05	8.08943e-05	7.25442e-05	6.48307e-05
1588.2	8.638	9.60652e-06	7.09737e-06	7.08739e-06	7.02757e-06	6.91844e-06	6.89247e-06	6.82695e-06	6.70719e-06	6.61203e-06	6.50924e-06	6.26739e-06	6.00621e-06	5.79688e-06	5.36358e-06	4.81612e-06	4.17565e-06	3.62724e-06
1595.65	8.639	2.11063e-05	1.61429e-05	1.60502e-05	1.59695e-05	1.58034e-05	1.56604e-05	1.55603e-05	1.53539e-05	1.50997e-05	1.48662e-05	1.44014e-05	1.39089e-05	1.34799e-05	1.27655e-05	1.13484e-05	9.98217e-06	8.77915e-06
1603.09	8.641	0.000195874	0.000157155	0.000156291	0.000155359	0.000154445	0.000153562	0.000152577	0.000150739	0.000148878	0.000147004	0.000143175	0.000139236	0.00013535	0.0001292	0.00011794	0.000105924	9.48208e-05
1610.53	8.642	0.000155839	0.000124021	0.000123274	0.000122549	0.000121798	0.00012098	0.000120236	0.000118683	0.000117129	0.000115509	0.000112412	0.000109282	0.000106049	0.000101181	9.18938e-05	8.22021e-05	7.3286e-05
1617.97	8.643	3.06886e-05	2.30221e-05	2.28519e-05	2.26578e-05	2.24282e-05	2.23302e-05	2.20877e-05	2.17444e-05	2.13503e-05	2.10172e-05	2.02617e-05	1.95633e-05	1.88023e-05	1.76431e-05	1.56338e-05	1.35877e-05	1.17577e-05
1625.41	8.645	3.8966e-06	2.87114e-06	2.8555e-06	2.82327e-06	2.84257e-06	2.79614e-06	2.78083e-06	2.71299e-06	2.64326e-06	2.64585e-06	2.53512e-06	2.40395e-06	2.25346e-06	2.23226e-06	1.92538e-06	1.66173e-06	1.41887e-06
1632.85	8.646	4.21512e-06	3.46428e-06	3.42995e-06	3.39512e-06	3.38414e-06	3.33869e-06	3.29657e-06	3.33497e-06	3.2716e-06	3.23232e-06	3.14643e-06	3.02033e-06	2.99354e-06	2.95159e-06	2.57401e-06	2.28311e-06	2.03101e-06
1640.29	8.648	3.09674e-05	2.49381e-05	2.47806e-05	2.46706e-05	2.45362e-05	2.43281e-05	2.42153e-05	2.39161e-05	2.35918e-05	2.33747e-05	2.27715e-05	2.20701e-05	2.13724e-05	2.05804e-05	1.86409e-05	1.66647e-05	1.4888e-05
1647.73	8.649	3.00255e-05	2.4568e-05	2.44344e-05	2.42732e-05	2.41772e-05	2.40676e-05	2.39213e-05	2.35872e-05	2.32888e-05	2.30883e-05	2.25461e-05	2.19616e-05	2.13092e-05	2.04507e-05	1.87194e-05	1.68465e-05	1.50852e-05
1655.17	8.65	1.00904e-05	7.7496e-06	7.76491e-06	7.67402e-06	7.58185e-06	7.52644e-06	7.52267e-06	7.39696e-06	7.25826e-06	7.16881e-06	6.99384e-06	6.7744e-06	6.5146e-06	6.06283e-06	5.50246e-06	4.80849e-06	4.22159e-06
1662.61	8.652	2.64361e-06	1.98511e-06	2.03653e-06	2.00249e-06	1.97894e-06	1.99376e-06	1.97091e-06	1.90374e-06	1.87356e-06	1.88957e-06	1.79713e-06	1.68905e-06	1.67992e-06	1.60509e-06	1.38584e-06	1.24128e-06	1.0747e-06
1670.05	8.653	1.22355e-06	8.31178e-07	8.85097e-07	9.22287e-07	9.02479e-07	8.7712e-07	8.31309e-07	8.48768e-07	8.14763e-07	8.05011e-07	7.57729e-07	6.93457e-07	8.34638e-07	7.00097e-07	6.27398e-07	5.47308e-07	4.79278e-07
1677.48	8.655	3.41102e-07	2.74253e-07	2.82567e-07	2.20497e-07	2.19367e-07	3.52522e-07	2.0761e-07	2.64973e-07	2.32062e-07	3.25452e-07	2.35681e-07	2.94227e-07	1.88209e-07	1.81732e-07	1.74712e-07	1.70257e-07	1.40237e-07
1684.92	8.656	1.34537e-07	1.75643e-07	5.93432e-08	8.03076e-08	1.63906e-07	1.16353e-07	3.91587e-08	1.85421e-07	1.65576e-07	8.08343e-08	1.50834e-07	1.60642e-07	1.33875e-07	1.0961e-07	1.05832e-07	6.78261e-08	7.52595e-08
1692.36	8.657	2.9565e-08	0	2.27523e-08	4.13402e-08	4.27429e-08	2.01582e-08	0	3.85077e-08	3.14599e-08	0	0	5.11472e-08	2.34017e-08	1.51895e-08	1.4793e-08	6.37908e-09	9.5134e-10
1699.8	8.659	1.30539e-08	1.21201e-08	8.45225e-09	0	2.32806e-08	0	6.85792e-09	1.97566e-08	0	0	0	1.4376e-08	0	6.00935e-09	-7.88632e-09	-1.45327e-08	-4.13309e-09
1707.23	8.66	4.30605e-08	3.25349e-08	0	0	3.0156e-08	3.4746e-08	4.29723e-08	1.12391e-08	8.09661e-08	2.35939e-08	1.61215e-08	0	2.25234e-08	6.20241e-09	1.17748e-08	-8.69007e-10	1.0519e-08
1714.67	8.662	6.77551e-09	0	0	0	4.0381e-24	1.00551e-08	2.06635e-08	0	1.84887e-08	0	0	9.05081e-24	-4.00393e-24	5.34772e-09	4.73538e-09	-8.31599e-09	-3.61662e-08
1722.1	8.663	0	0	-1.45482e-24	0	1.67215e-08	2.86001e-08	1.4125e-08	1.40495e-08	0	2.14592e-08	0	0	3.31237e-09	4.40582e-09	5.50515e-09	4.19007e-09	-1.15824e-08
1729.54	8.664	0	1.22332e-08	0	1.25e-08	0	0	3.84079e-09	0	0	0	0	0	0	7.34661e-09	-4.57192e-09	6.03909e-09	0
1736.97	8.666	0	0	0	0	0	3.06943e-08	3.15071e-08	0	0	0	0	0	-1.34279e-09	9.82665e-09	9.4094e-09	0	0
1744.41	8.667	0	0	0	0	0	0	0	0	0	0	0	0	-1.84167e-09	2.00051e-09	0	0	0
1751.84	8.669	1.57687e-07	9.15194e-08	9.97635e-08	4.21838e-08	7.46666e-08	8.07121e-08	5.20651e-08	5.47871e-08	6.4511e-08	8.9366e-08	5.94475e-08	1.3297e-07	6.84411e-08	7.41534e-08	6.313e-08	5.6639e-08	4.5851e-08
1759.27	8.67	2.19639e-07	1.6398e-07	1.21819e-07	6.63525e-08	1.14413e-07	1.31709e-07	1.7481e-07	9.82672e-08	1.36905e-07	1.21607e-07	5.09137e-08	7.59551e-08	5.49987e-08	1.02921e-07	7.98294e-08	7.0279e-08	5.87517e-08
1766.71	8.671	1.23372e-07	9.49217e-08	5.0736e-08	6.89328e-08	1.74494e-07	6.69564e-08	4.55639e-08	9.8749e-08	1.29771e-07	2.88609e-08	5.04257e-09	5.30592e-08	7.11264e-08	4.10021e-08	4.56866e-08	1.36821e-08	2.23901e-08
1774.14	8.673	2.26748e-08	1.20488e-08	2.81845e-08	5.65348e-08	0	0	0	0	9.78591e-09	0	3.48677e-08	6.6792e-09	1.55581e-08	1.17449e-08	1.24149e-08	2.30711e-08	1.9219e-08
1781.57	8.674	1.86669e-08	0	0	2.53167e-08	2.33267e-08	3.13534e-08	8.34045e-24	0	0	2.8368e-08	6.29245e-09	6.23015e-09	1.51794e-08	9.14784e-09	6.17695e-09	0	6.48577e-09
1789.01	8.676	2.31906e-07	6.08552e-08	1.89481e-07	2.35993e-07	2.78081e-07	1.89345e-07	7.02443e-08	1.61728e-07	1.18649e-07	2.05101e-07	7.3861e-08	1.39274e-07	1.21664e-07	8.83504e-08	5.09811e-08	7.57948e-08	4.88432e-08
1796.44	8.677	1.12282e-07	2.64442e-08	1.06046e-07	7.72767e-08	6.80424e-08	9.00493e-08	5.97249e-08	7.40384e-08	1.2632e-07	4.36151e-08	3.55727e-08	6.491e-08	4.46173e-08	6.01447e-08	3.96319e-08	4.52477e-08	2.30334e-08
1803.87	8.678	9.27467e-08	8.19713e-08	7.92495e-09	1.3171e-08	7.55829e-09	7.97998e-08	1.28193e-08	1.50812e-08	8.24297e-09	2.67596e-08	1.19229e-08	4.93225e-09	1.77023e-08	1.6396e-08	3.04179e-08	0	6.19976e-09
1811.3	8.68	4.66189e-08	0	7.87648e-10	0	1.38919e-08	0	0	8.18168e-09	0	1.08097e-08	7.35994e-09	1.02429e-08	1.66107e-08	2.07069e-08	0	1.87177e-08	6.00348e-09
1818.73	8.681	0	0	0	5.16298e-10	6.89176e-09	0	0	0	5.89374e-09	0	0	-1.47657e-08	0	0	0	0	0
1826.16	8.683	0	0	0	1.79657e-08	0	0	0	0	0	0	0	1.90222e-08	0	0	0	0	0
1833.59	8.684	0	0	0	0	0	0	0	0	0	0	0	0	0	0	0	0	0
1841.02	8.685	0	0	0	0	0	0	0	0	0	0	0	0	0	0	0	0	0
1848.45	8.687	0	0	0	0	0	0	0	0	0	0	0	0	0	0	0	0	0
1855.88	8.688	0	0	0	0	0	0	0	0	0	0	0	0	0	0	0	0	0
1863.31	8.69	0	0	2.34086e-08	4.63284e-08	2.34925e-08	2.81986e-08	0	2.37011e-08	3.13808e-08	9.05514e-08	0	4.55501e-08	1.21443e-08	5.50825e-08	4.34893e-08	0	5.19136e-09
1870.73	8.691	1.22658e-06	1.25831e-06	1.2416e-06	1.24978e-06	1.27927e-06	1.26327e-06	1.20183e-06	1.17126e-06	1.24817e-06	1.23456e-06	1.246e-06	1.20091e-06	1.23188e-06	1.27345e-06	1.28373e-06	1.22173e-06	1.19587e-06
1878.16	8.692	5.06019e-05	3.12821e-05	3.12218e-05	3.10811e-05	3.10777e-05	3.10304e-05	3.08958e-05	3.0731e-05	3.062e-05	3.04777e-05	3.00748e-05	2.96371e-05	2.9106e-05	2.82355e-05	2.63367e-05	2.38794e-05	2.19444e-05
1885.59	8.694	3.49011e-05	2.54312e-05	2.54049e-05	2.5336e-05	2.53023e-05	2.52656e-05	2.52167e-05	2.51068e-05	2.49269e-05	2.48771e-05	2.4587e-05	2.42713e-05	2.3834e-05	2.32072e-05	2.17925e-05	1.99915e-05	1.82793e-05
1893.01	8.695	4.9671e-06	3.4222e-06	3.47975e-06	3.51986e-06	3.47466e-06	3.46071e-06	3.45127e-06	3.41194e-06	3.40737e-06	3.46525e-06	3.37092e-06	3.32193e-06	3.27042e-06	3.18767e-06	2.96419e-06	2.70351e-06	2.4357e-06
1900.44	8.697	1.34433e-06	7.03013e-07	6.96135e-07	6.6965e-07	6.08198e-07	6.14359e-07	7.42316e-07	6.95658e-07	6.7122e-07	7.39702e-07	6.68011e-07	5.90735e-07	6.93963e-07	4.59778e-07	7.10412e-07	5.74895e-07	3.59099e-07
1907.86	8.698	1.00783e-06	4.18336e-07	4.5002e-07	6.0691e-07	4.85894e-07	4.91258e-07	4.72172e-07	5.58694e-07	4.6204e-07	4.36392e-07	4.52587e-07	4.03755e-07	5.53823e-07	4.2935e-07	4.94838e-07	2.97352e-07	3.84208e-07
1915.29	8.699	5.17083e-07	2.4471e-07	2.57451e-07	2.02451e-07	3.83004e-07	2.79036e-07	2.63855e-07	2.13308e-07	2.5546e-07	3.17321e-07	2.46663e-07	1.78975e-07	2.02863e-07	2.46602e-07	2.3928e-07	1.29118e-07	1.43176e-07
1922.71	8.701	5.53487e-07	2.62324e-07	3.07312e-07	3.14235e-07	3.71299e-07	3.19228e-07	2.76327e-07	3.05315e-07	3.14536e-07	3.51957e-07	2.19499e-07	2.7541e-07	3.05734e-07	2.27838e-07	1.90049e-07	1.44002e-07	9.88621e-08
1930.14	8.702	5.28435e-07	3.4498e-07	3.3878e-07	2.73218e-07	3.30803e-07	3.27256e-07	2.94169e-07	2.87844e-07	2.76649e-07	2.84339e-07	1.94006e-07	2.88709e-07	3.31046e-07	2.58592e-07	2.97941e-07	2.92304e-07	1.51127e-07
1937.56	8.704	2.18451e-05	1.35081e-05	1.34504e-05	1.33219e-05	1.33113e-05	1.32056e-05	1.30805e-05	1.29395e-05	1.2727e-05	1.2514e-05	1.21545e-05	1.17584e-05	1.1272e-05	1.05287e-05	9.04123e-06	7.37462e-06	5.98028e-06
1944.98	8.705	0.000393842	0.000269014	0.000267328	0.000265614	0.00026389	0.000262161	0.000260388	0.000256847	0.000253188	0.000249454	0.000241759	0.000233808	0.000225598	0.000212432	0.000186776	0.00015809	0.000134303
1952.41	8.706	0.00115505	0.000832356	0.00082756	0.000822684	0.000817737	0.00081281	0.000807814	0.00079764	0.000787297	0.000776687	0.00075489	0.000732062	0.000708636	0.000670525	0.000595636	0.000510407	0.000439313
1959.83	8.708	0.00112526	0.000850686	0.000846327	0.000841832	0.000837318	0.000832787	0.000828185	0.00081884	0.000809303	0.000799572	0.000779297	0.000758007	0.000735952	0.000699725	0.000627075	0.000542487	0.000470518
1967.25	8.709	0.000995299	0.000755645	0.000750808	0.000746018	0.00074111	0.000736205	0.000731294	0.00072135	0.00071133	0.000701184	0.000680455	0.000659142	0.0006377	0.000603084	0.000535205	0.000458037	0.000391386
1974.67	8.711	0.000298031	0.000234208	0.000232734	0.000231367	0.00022988	0.000228388	0.000226877	0.000224017	0.000220979	0.000217935	0.000211791	0.000205478	0.000199173	0.000189044	0.000169	0.000146012	0.000125266
1982.09	8.712	6.90791e-05	5.398e-05	5.35615e-05	5.3181e-05	5.28792e-05	5.25462e-05	5.20473e-05	5.13491e-05	5.05888e-05	4.9844e-05	4.82776e-05	4.67273e-05	4.51474e-05	4.26878e-05	3.77646e-05	3.21535e-05	2.71863e-05
1989.52	8.714	4.42324e-05	3.47195e-05	3.4473e-05	3.41524e-05	3.391e-05	3.37306e-05	3.34415e-05	3.29359e-05	3.25404e-05	3.20625e-05	3.10959e-05	3.01128e-05	2.91532e-05	2.76052e-05	2.46252e-05	2.11788e-05	1.80983e-05
1996.94	8.715	0.000580599	0.000480871	0.000478669	0.000476266	0.000473898	0.000471608	0.000469288	0.000464464	0.000459572	0.000454556	0.000444285	0.000433485	0.000422453	0.000404113	0.000366448	0.000320788	0.000279211
2004.35	8.716	0.00359316	0.00241115	0.00239427	0.00237724	0.00236014	0.00234276	0.00232533	0.00229018	0.00225448	0.00221811	0.00214363	0.0020662	0.00198603	0.00185728	0.00161016	0.00133748	0.00112896
2011.77	8.718	0.00277974	0.00200175	0.00198797	0.0019741	0.00196008	0.00194609	0.00193192	0.00190347	0.00187459	0.00184532	0.0017855	0.00172371	0.00166051	0.00155855	0.00136016	0.00113766	0.000959092
2019.19	8.719	0.00169178	0.00126047	0.00125188	0.00124327	0.00123461	0.00122596	0.00121725	0.00119969	0.00118195	0.00116405	0.00112746	0.00108979	0.00105166	0.000990191	0.000869767	0.000732835	0.000618108
2026.61	8.721	0.000590311	0.000447191	0.000443788	0.000440375	0.000436942	0.000433496	0.000430081	0.000423216	0.000416353	0.000409432	0.000395548	0.000381418	0.000367564	0.000345421	0.000302446	0.000254319	0.000211787
2034.03	8.722	0.00028733	0.000227091	0.000225639	0.000224023	0.000222565	0.000220918	0.000219382	0.000216292	0.000213173	0.000210042	0.000203762	0.000197329	0.000191013	0.00018088	0.000160844	0.00013784	0.000116823
2041.45	8.723	0.000309879	0.000253449	0.000251979	0.000250565	0.000249155	0.000247722	0.000246247	0.000243336	0.000240394	0.000237423	0.000231399	0.00022518	0.00021902	0.000209016	0.000188772	0.000164786	0.000142428
2048.86	8.725	0.000639402	0.000511768	0.000508708	0.000505501	0.000502382	0.000499247	0.000496088	0.000489738	0.000483294	0.000476835	0.000463664	0.000450106	0.000436632	0.000414821	0.000370903	0.000319347	0.000272575
2056.28	8.726	0.000986523	0.000784247	0.000779499	0.000774703	0.00076997	0.000765185	0.000760339	0.00075068	0.000740915	0.000731034	0.000710844	0.000690067	0.000669263	0.000635485	0.000567284	0.000486875	0.000415318
2063.7	8.727	0.000780942	0.000623651	0.000619846	0.000616061	0.000612263	0.000608488	0.000604659	0.000596963	0.000589266	0.000581423	0.000565507	0.000549144	0.000532799	0.00050631	0.000452861	0.000389657	0.000332718
2071.11	8.729	0.00070572	0.000550788	0.000547027	0.000543347	0.000539552	0.000535799	0.000532025	0.000524467	0.000516873	0.00050919	0.000493702	0.000477845	0.000462168	0.000436958	0.000386877	0.000328794	0.000276991
2078.53	8.73	0.000386298	0.000306408	0.000304461	0.000302432	0.000300345	0.000298309	0.000296242	0.000292156	0.000288007	0.000283842	0.000275452	0.000266818	0.00025834	0.000244621	0.000217385	0.000185562	0.000156381
2085.94	8.732	0.000306432	0.000239237	0.000237516	0.00023576	0.000234036	0.000232305	0.000230584	0.000227119	0.000223629	0.000220132	0.000213087	0.000205918	0.000198934	0.000187735	0.000165602	0.000140233	0.000116971
2093.36	8.733	0.000149421	0.000115603	0.00011473	0.000113773	0.000112909	0.000112033	0.000111174	0.000109371	0.000107634	0.00010585	0.000102296	9.87306e-05	9.51993e-05	8.96524e-05	7.87475e-05	6.63827e-05	5.5124e-05
2100.77	8.734	5.92837e-05	4.70779e-05	4.67475e-05	4.65526e-05	4.60829e-05	4.57499e-05	4.54406e-05	4.48063e-05	4.41514e-05	4.35101e-05	4.21914e-05	4.08813e-05	3.96066e-05	3.74692e-05	3.33881e-05	2.86247e-05	2.40374e-05
2108.18	8.736	2.64645e-05	2.16601e-05	2.14299e-05	2.1148e-05	2.10844e-05	2.09567e-05	2.08254e-05	2.05633e-05	2.02992e-05	2.0025e-05	1.9481e-05	1.89226e-05	1.83744e-05	1.74665e-05	1.57008e-05	1.36028e-05	1.15333e-05
2115.59	8.737	2.22953e-05	1.81878e-05	1.79749e-05	1.78571e-05	1.78403e-05	1.77158e-05	1.76024e-05	1.73785e-05	1.71576e-05	1.69158e-05	1.64729e-05	1.59853e-05	1.5489e-05	1.47771e-05	1.32326e-05	1.14916e-05	9.8768e-06
2123.01	8.739	4.61936e-06	3.35131e-06	3.40137e-06	3.4925e-06	3.42536e-06	3.39643e-06	3.3642e-06	3.29571e-06	3.25838e-06	3.20862e-06	3.08261e-06	2.98968e-06	2.91453e-06	2.75289e-06	2.44011e-06	2.03094e-06	1.69231e-06
2130.42	8.74	2.38089e-06	1.82103e-06	2.0063e-06	1.79089e-06	1.83964e-06	1.81572e-06	1.83057e-06	1.78981e-06	1.76591e-06	1.74337e-06	1.68298e-06	1.68218e-06	1.5909e-06	1.51016e-06	1.28545e-06	1.08734e-06	9.90844e-07
2137.83	8.741	1.74322e-06	1.53958e-06	1.38056e-06	1.37425e-06	1.3914e-06	1.38513e-06	1.36958e-06	1.35469e-06	1.35131e-06	1.31767e-06	1.2674e-06	1.22173e-06	1.18822e-06	1.10678e-06	1.004e-06	8.24884e-07	7.98968e-07
2145.24	8.743	9.1138e-06	7.45818e-06	7.31557e-06	7.32126e-06	7.27273e-06	7.22248e-06	7.19006e-06	7.08318e-06	6.99554e-06	6.90818e-06	6.73558e-06	6.56045e-06	6.38506e-06	6.13761e-06	5.56619e-06	4.86897e-06	4.08843e-06
2152.65	8.744	1.49299e-05	1.27677e-05	1.25727e-05	1.2504e-05	1.24607e-05	1.23922e-05	1.2324e-05	1.22058e-05	1.20683e-05	1.19467e-05	1.17261e-05	1.14646e-05	1.12153e-05	1.07767e-05	9.83593e-06	8.66108e-06	7.56213e-06
2160.06	8.746	1.27265e-05	1.07565e-05	1.06968e-05	1.06299e-05	1.05747e-05	1.05091e-05	1.04524e-05	1.03515e-05	1.02332e-05	1.01267e-05	9.88687e-06	9.68114e-06	9.40942e-06	9.04758e-06	8.27e-06	7.30196e-06	6.26716e-06
2167.47	8.747	9.2938e-06	7.59943e-06	7.58144e-06	7.51717e-06	7.48743e-06	7.43138e-06	7.39224e-06	7.28249e-06	7.20945e-06	7.09786e-06	6.94536e-06	6.74204e-06	6.55144e-06	6.20952e-06	5.65837e-06	4.81504e-06	4.16834e-06
2174.88	8.748	3.35277e-06	2.65221e-06	2.65193e-06	2.63314e-06	2.62595e-06	2.60118e-06	2.56842e-06	2.52469e-06	2.50333e-06	2.47941e-06	2.3996e-06	2.33351e-06	2.27838e-06	2.18835e-06	1.92011e-06	1.73497e-06	1.41754e-06
2182.28	8.75	6.9194e-07	5.42382e-07	5.37492e-07	5.24689e-07	5.3377e-07	5.09824e-07	5.18269e-07	5.09138e-07	5.13533e-07	4.82017e-07	4.64723e-07	4.64072e-07	4.80462e-07	4.12103e-07	3.85896e-07	2.97684e-07	2.72561e-07
2189.69	8.751	9.06114e-07	7.50865e-07	7.41563e-07	7.38841e-07	7.429e-07	7.3178e-07	7.18754e-07	7.29713e-07	6.84926e-07	7.09775e-07	6.76792e-07	6.7985e-07	6.1883e-07	6.06821e-07	5.21503e-07	3.20153e-07	3.72481e-07
2197.1	8.753	2.88163e-07	2.42932e-07	2.22793e-07	2.15325e-07	2.11402e-07	2.41388e-07	2.30841e-07	2.2748e-07	1.95537e-07	1.84159e-07	1.89276e-07	2.20801e-07	1.95082e-07	1.68392e-07	1.76083e-07	1.48283e-07	9.32353e-08
2204.5	8.754	9.77461e-08	8.76954e-08	6.7349e-08	3.17268e-08	3.96977e-08	6.17748e-08	4.91629e-08	6.65029e-08	5.70103e-08	5.33469e-08	6.02765e-08	4.9078e-08	4.64085e-08	1.70261e-08	1.00171e-07	4.60238e-08	2.95503e-08
2211.91	8.755	3.53292e-07	2.72884e-07	2.76835e-07	2.69475e-07	2.6584e-07	2.6687e-07	2.67254e-07	2.58209e-07	2.44115e-07	2.4056e-07	2.57367e-07	2.62141e-07	2.39345e-07	1.86432e-07	2.26947e-07	1.06678e-07	1.85175e-07
2219.31	8.757	2.17519e-07	1.3286e-07	1.31791e-07	1.42107e-07	1.51576e-07	1.40178e-07	1.40953e-07	1.31685e-07	1.16819e-07	1.13979e-07	9.32754e-08	1.69192e-07	1.3863e-07	1.00862e-07	5.60265e-08	2.43782e-08	5.01701e-08
2226.72	8.758	1.8111e-07	1.72886e-07	1.57457e-07	1.62275e-07	1.55975e-07	1.53947e-07	1.6596e-07	1.49691e-07	1.33824e-07	1.86445e-07	1.52902e-07	1.67884e-07	1.35095e-07	9.33537e-08	4.09777e-08	1.14876e-07	1.21202e-07
2234.12	8.76	6.42654e-08	6.41787e-08	7.20894e-08	3.63876e-08	7.18113e-08	5.00224e-08	6.04343e-08	5.94847e-08	2.20356e-08	4.7985e-08	1.75344e-08	6.14691e-08	1.9624e-08	7.93106e-08	6.87663e-08	-2.74694e-23	4.13088e-08
2241.53	8.761	1.54441e-08	1.90459e-08	3.6374e-08	3.6299e-08	4.00782e-08	2.49841e-08	2.82737e-08	4.3939e-08	2.88061e-08	3.16285e-08	3.20681e-08	1.45944e-08	0	2.52761e-08	3.49055e-08	5.10041e-08	2.29405e-08
2248.93	8.763	1.42245e-07	9.77851e-08	1.19749e-07	8.98282e-08	1.1124e-07	1.15891e-07	8.54329e-08	1.10286e-07	1.03288e-07	1.06123e-07	1.20662e-07	6.86833e-08	6.3546e-08	7.05549e-08	9.84135e-08	8.65666e-08	2.8137e-08
2256.33	8.764	1.54794e-07	1.60902e-07	1.67609e-07	1.48944e-07	1.76033e-07	1.71363e-07	1.75155e-07	1.58733e-07	1.36559e-07	1.45696e-07	1.5798e-07	1.54849e-07	1.70873e-07	6.03326e-08	6.29192e-08	8.45696e-08	8.97537e-08
2263.73	8.765	4.32148e-08	6.20176e-08	6.39402e-08	6.84489e-08	5.24124e-08	6.07367e-08	8.54881e-08	5.66115e-08	7.25391e-08	8.46175e-08	1.9794e-08	1.64323e-08	9.07138e-08	1.98146e-08	0	3.85464e-08	6.4726e-08
2271.14	8.767	1.39007e-08	6.523e-08	4.28758e-08	4.44346e-08	3.10771e-08	2.59434e-08	2.20176e-08	3.72741e-08	5.82643e-08	6.29053e-08	6.14797e-09	6.5843e-08	1.30146e-07	5.18773e-08	8.24486e-08	1.05608e-07	3.46975e-08
2278.54	8.768	1.23034e-07	5.56667e-08	4.7437e-08	7.68195e-08	3.94388e-08	4.60709e-08	9.67139e-08	5.66892e-08	4.95434e-08	3.99317e-08	5.17275e-08	6.10017e-08	7.8551e-08	9.10667e-08	1.8788e-08	-1.51822e-09	5.40475e-08
2285.94	8.77	0	1.59037e-08	5.83312e-09	3.11224e-08	6.74375e-09	5.02577e-09	3.09461e-08	6.00628e-09	0	4.55785e-09	2.79796e-08	1.69617e-08	1.78871e-08	0	0	-2.95608e-08	1.12334e-08
2293.34	8.771	0	2.01501e-08	3.24056e-09	8.682e-09	2.06514e-08	1.69423e-08	4.07597e-08	9.7356e-09	7.75406e-09	0	2.16457e-08	0	8.72716e-09	0	0	0	-8.44662e-10
2300.74	8.772	0	2.82282e-24	6.14717e-25	0	0	0	2.2159e-08	1.17018e-08	7.31312e-09	0	0	0	2.62893e-08	0	0	0	9.02373e-09
2308.14	8.774	0	7.00979e-09	0	1.07092e-08	0	8.98011e-09	8.78812e-09	1.06734e-08	3.48379e-09	0	1.97588e-08	0	2.51787e-08	0	0	0	1.00663e-08
2315.53	8.775	0	0	0	8.61422e-09	0	2.47716e-24	0	0	0	1.18385e-08	1.28484e-09	0	0	0	0	0	0
2322.93	8.777	0	0	0	0	0	1.511e-08	0	0	0	0	-7.30222e-09	0	1.09902e-08	0	0	0	1.18374e-08
2330.33	8.778	0	0	0	6.34458e-09	0	0	0	0	0	0	0	0	0	0	0	0	0
2337.73	8.779	0	0	6.73581e-09	0	0	0	0	0	0	1.33893e-08	-1.52948e-08	0	0	0	0	-1.07599e-08	0
2345.12	8.781	0	0	0	0	0	0	0	0	0	1.49829e-08	0	0	0	0	0	1.32371e-08	0
2352.52	8.782	0	0	6.09867e-09	0	0	0	0	0	0	0	0	0	0	0	0	0	0
2359.91	8.783	0	-2.9938e-09	0	0	0	0	0	0	0	0	2.43169e-08	1.89565e-08	0	0	0	8.30776e-09	0
2367.31	8.785	0	0	1.88533e-09	1.90933e-08	-1.16493e-08	1.70542e-08	1.75485e-08	0	1.38659e-08	0	0	2.93792e-08	0	0	0	0	0
2374.7	8.786	0	0	0	-2.50905e-24	-7.11281e-09	2.03061e-08	0	0	0	0	0	0	0	0	0	0	0
2382.09	8.788	0	0	0	0	0	4.48416e-09	0	0	0	-2.56497e-08	0	0	0	0	0	5.73771e-09	1.23779e-08
2389.49	8.789	0	0	-8.25227e-09	0	0	0	0	0	2.62765e-08	-2.20239e-08	-1.60481e-08	0	0	0	0	1.49651e-08	1.45903e-08
2396.88	8.79	0	0	-9.23057e-09	0	0	0	0	0	3.02475e-08	-1.59003e-08	-1.80507e-08	0	0	0	3.66089e-08	7.306e-09	0
2404.27	8.792	0	0	0	1.05934e-08	5.74537e-09	0	0	0	0	0	0	0	2.37224e-08	0	0	-1.20603e-08	0
2411.66	8.793	0	1.30031e-08	-8.40771e-09	3.22744e-09	5.80381e-09	0	9.04151e-09	0	0	0	0	0	0	0	0	-2.94728e-09	0
2419.05	8.795	0	0	0	0	-2.33631e-09	0	1.83356e-08	0	0	0	0	0	0	0	0	-5.75658e-09	0
2426.44	8.796	0	9.61592e-09	0	2.10981e-08	0	0	0	0	0	0	-4.04102e-09	0	0	0	0	-3.32226e-09	0
2433.83	8.797	0	0	0	0	0	0	0	0	0	2.30885e-08	-4.78731e-09	0	0	0	7.71207e-09	-2.69033e-09	0
2441.22	8.799	1.05325e-08	-1.13592e-24	5.89813e-09	0	5.00848e-24	0	6.6079e-09	5.56347e-09	2.28035e-08	0	2.02437e-08	3.4958e-09	0	2.05063e-08	0	-3.95448e-09	1.34896e-08
2448.61	8.8	2.68005e-09	0	0	0	0	0	0	0	0	2.15253e-08	0	0	5.66593e-08	0	0	0	1.53861e-08
2455.99	8.802	4.0087e-08	0	0	0	0	0	0	1.42536e-08	0	2.28718e-08	0	0	5.99282e-08	1.6816e-08	0	-1.63013e-08	0
2463.38	8.803	3.00952e-08	8.76219e-09	0	8.30756e-09	6.55204e-09	2.30747e-08	0	6.51701e-08	0	-8.792e-26	4.1263e-08	0	0	0	0	2.82607e-08	-1.47993e-08
2470.77	8.804	1.12905e-07	1.12186e-07	1.14748e-08	2.25366e-08	3.09535e-08	5.47175e-08	6.23349e-08	5.43233e-08	7.67419e-08	2.59423e-08	4.75569e-08	4.39129e-08	3.33835e-08	2.65447e-08	0	5.58469e-24	5.22656e-08
2478.15	8.806	2.79951e-07	1.68302e-07	1.36308e-07	1.48366e-07	1.77222e-07	1.63727e-07	1.81567e-07	1.19946e-07	1.71209e-07	1.32805e-07	1.16908e-07	1.55888e-07	1.72584e-07	1.61878e-07	5.73336e-08	6.72204e-08	4.67626e-08
2485.54	8.807	5.08929e-06	3.57578e-06	3.49939e-06	3.5367e-06	3.3819e-06	3.449e-06	3.44154e-06	3.30915e-06	3.31414e-06	3.23599e-06	3.0735e-06	2.94521e-06	2.9148e-06	2.80697e-06	2.36696e-06	1.94874e-06	1.54032e-06
2492.92	8.809	2.05378e-06	1.51906e-06	1.53562e-06	1.45157e-06	1.42936e-06	1.47353e-06	1.44382e-06	1.38081e-06	1.42544e-06	1.29089e-06	1.29662e-06	1.3494e-06	1.20404e-06	1.27063e-06	9.66511e-07	8.16727e-07	6.86834e-07

## Sheet: k_PRISMA
Wavelength	FWHM	k_Summer_L	k_Summer_M	k_Summer_H	k_Winter_L	k_Winter_M	k_Winter_H	k_1976_L	k_1976_M	k_1976_H
943.093	11.1634	0	-6.8118e-10	-5.62598e-27	0	1.52722e-09	0	0	0	0	-8.18276e-10	2.54115e-09	8.84233e-10	1.6575e-09	6.34591e-09	3.21896e-09	3.95858e-09	0
951.123	11.2245	0	0	2.69153e-26	0	0	0	0	0	0	1.05036e-09	1.4428e-09	1.04266e-09	1.95618e-09	1.31143e-09	3.69464e-09	4.41342e-09	0
959.679	12.4243	0	0	0	0	0	0	0	0	0	0	0	0	0	0	0	0	0
969.494	12.4752	0	0	0	0	0	0	0	0	0	0	0	0	0	0	0	0	0
978.688	12.2031	0	0	0	0	0	0	0	0	0	0	0	0	0	0	0	0	0
988.394	12.4208	0	0	0	0	0	0	0	0	0	0	0	0	0	0	0	0	0
998.492	13.0605	0	0	0	0	0	0	0	0	0	0	0	0	0	0	0	0	0
1008.29	12.7977	0	0	0	0	0	0	0	0	0	0	0	0	0	0	0	0	0
1018.18	13.3457	0	0	0	0	0	0	0	0	0	0	0	0	0	0	0	0	0
1028.97	13.3271	0	0	0	0	0	0	0	0	0	0	0	0	0	0	0	0	0
1038.22	13.3406	4.31761e-07	3.22428e-07	3.25601e-07	3.31029e-07	3.21523e-07	3.17151e-07	3.14752e-07	3.05344e-07	3.0272e-07	2.95314e-07	2.98585e-07	2.8522e-07	2.67363e-07	2.63501e-07	2.35882e-07	2.11739e-07	2.1611e-07
1047.9	13.6246	9.25805e-07	7.10811e-07	7.05438e-07	7.05079e-07	6.93005e-07	6.97196e-07	6.81532e-07	6.83044e-07	6.71967e-07	6.66096e-07	6.5052e-07	6.35884e-07	6.08366e-07	5.72145e-07	5.3988e-07	4.67928e-07	4.19714e-07
1057.87	13.8052	4.8445e-07	3.56651e-07	3.50333e-07	3.5364e-07	3.51279e-07	3.53332e-07	3.39479e-07	3.48613e-07	3.53524e-07	3.40338e-07	3.34858e-07	3.15083e-07	3.09317e-07	2.76962e-07	2.49812e-07	2.37798e-07	2.09693e-07
1068.11	14.0138	1.98564e-07	1.56392e-07	1.58074e-07	1.52349e-07	1.41019e-07	1.56266e-07	1.42972e-07	1.528e-07	1.41739e-07	1.49706e-07	1.37743e-07	1.34571e-07	1.23293e-07	1.04656e-07	1.21104e-07	1.05853e-07	9.29143e-08
1078.56	14.1443	1.94951e-08	9.98836e-09	1.65948e-08	2.39388e-08	1.40318e-08	1.71648e-08	1.30082e-08	2.04524e-08	1.17578e-08	1.52919e-08	2.4106e-08	2.60272e-08	2.88934e-09	5.93908e-09	7.51338e-09	4.4505e-09	1.04344e-08
1089.09	14.237	1.13798e-09	1.76143e-09	0	0	0	0	1.80731e-09	5.12746e-09	0	1.12481e-09	-5.54218e-10	0	0	0	0	-4.06278e-09	0
1099.62	14.2462	0	0	0	0	0	-9.23256e-10	1.92668e-09	4.49957e-09	0	3.0187e-09	0	0	0	0	0	0	0
1110.27	14.509	0	0	0	0	2.06392e-25	0	1.85609e-09	0	0	-9.83883e-10	0	0	0	0	2.42064e-09	0	2.39714e-09
1121.01	14.2789	0	0	0	0	1.25569e-24	0	0	0	4.49833e-10	-1.55734e-09	0	0	0	0	4.14774e-09	0	4.17695e-09
1131.68	14.4797	0	0	0	1.74529e-09	0	0	0	4.50156e-09	0	0	5.80811e-09	0	1.28502e-24	0	0	0	5.08451e-10
1142.36	14.3065	0	0	0	0	0	0	0	0	0	0	0	0	0	0	0	0	0
1153	14.5513	0	2.81746e-09	0	0	0	0	0	0	0	0	0	0	0	0	0	0	0
1164.03	14.8343	0	0	0	0	-3.78576e-09	0	0	0	0	0	0	3.23401e-09	0	0	0	0	0
1175.07	14.4813	0	0	0	0	0	0	0	0	0	0	0	3.29283e-09	0	0	0	0	0
1185.9	14.5792	0	0	0	0	0	0	0	0	0	0	0	0	0	0	0	0	0
1196.7	14.5482	2.66482e-06	2.17225e-06	2.16061e-06	2.14969e-06	2.14519e-06	2.12876e-06	2.11603e-06	2.09305e-06	2.07198e-06	2.05295e-06	2.00517e-06	1.95832e-06	1.9191e-06	1.84117e-06	1.71046e-06	1.54928e-06	1.41944e-06
1207.6	14.6949	2.67387e-05	2.11797e-05	2.10547e-05	2.0937e-05	2.08291e-05	2.07069e-05	2.05676e-05	2.03278e-05	2.0055e-05	1.98263e-05	1.9307e-05	1.88133e-05	1.83031e-05	1.75362e-05	1.61067e-05	1.46627e-05	1.33325e-05
1218.23	14.5848	1.87811e-05	1.45758e-05	1.44822e-05	1.43812e-05	1.42803e-05	1.42182e-05	1.41234e-05	1.3937e-05	1.37351e-05	1.35763e-05	1.31907e-05	1.28408e-05	1.24411e-05	1.19184e-05	1.08805e-05	9.86986e-06	8.86843e-06
1229.48	15.038	6.41588e-06	4.93908e-06	4.90932e-06	4.86899e-06	4.8328e-06	4.8159e-06	4.76937e-06	4.69886e-06	4.63314e-06	4.58514e-06	4.42208e-06	4.28511e-06	4.14462e-06	3.96631e-06	3.60237e-06	3.2511e-06	2.92247e-06
1240.57	14.5454	5.57841e-07	4.1614e-07	3.9758e-07	4.17406e-07	4.24712e-07	4.10469e-07	4.30057e-07	4.09614e-07	4.01309e-07	3.94893e-07	3.75758e-07	3.6978e-07	3.54489e-07	3.45195e-07	3.02722e-07	2.30684e-07	2.29051e-07
1251.35	14.976	1.56087e-07	1.14646e-07	1.27379e-07	1.1739e-07	1.15295e-07	1.19918e-07	1.23981e-07	1.32725e-07	1.26735e-07	1.01695e-07	1.08257e-07	1.14717e-07	9.84595e-08	1.41367e-07	1.55234e-07	1.30595e-07	6.33213e-08
1262.86	15.0231	2.16767e-07	1.53977e-07	1.73241e-07	1.61572e-07	1.42096e-07	1.4492e-07	1.51592e-07	1.62921e-07	1.50484e-07	1.67935e-07	1.40859e-07	1.61242e-07	1.29545e-07	1.71527e-07	6.85539e-08	1.03077e-07	9.18267e-08
1273.81	14.6921	5.08942e-09	9.28811e-10	1.44449e-08	1.4867e-08	1.28011e-09	1.02854e-08	1.23788e-08	-2.68761e-10	1.10061e-08	1.13442e-08	0	0	-5.33985e-09	0	0	2.53436e-09	6.23077e-09
1284.76	14.6612	6.66637e-07	5.12766e-07	5.20148e-07	5.06827e-07	4.98638e-07	4.99095e-07	5.07893e-07	4.91671e-07	4.96361e-07	4.94967e-07	4.70384e-07	4.63446e-07	4.3322e-07	4.16497e-07	3.56624e-07	3.4366e-07	2.98754e-07
1295.65	14.6497	1.57011e-06	1.24729e-06	1.25052e-06	1.19384e-06	1.2199e-06	1.22476e-06	1.2175e-06	1.19533e-06	1.18547e-06	1.16696e-06	1.14129e-06	1.11096e-06	1.08387e-06	1.03626e-06	9.53173e-07	8.40018e-07	7.63383e-07
1306.5	14.6907	3.83494e-07	2.99444e-07	2.88789e-07	2.87243e-07	3.1167e-07	3.01045e-07	2.88163e-07	2.79554e-07	2.87932e-07	2.83789e-07	2.71942e-07	2.66164e-07	2.58426e-07	2.40017e-07	2.19668e-07	1.87196e-07	1.76835e-07
1317.47	14.8011	6.14645e-06	4.79141e-06	4.77044e-06	4.73085e-06	4.70699e-06	4.67884e-06	4.63792e-06	4.59048e-06	4.51864e-06	4.45714e-06	4.36034e-06	4.24812e-06	4.12015e-06	3.89911e-06	3.57545e-06	3.202e-06	2.93999e-06
1328.54	14.8526	5.6021e-07	3.76082e-07	3.99824e-07	3.68614e-07	3.8269e-07	3.76413e-07	3.66974e-07	3.68119e-07	3.64019e-07	3.33225e-07	3.2353e-07	3.35845e-07	3.09521e-07	3.10613e-07	2.612e-07	2.26393e-07	1.99617e-07
1339.4	14.642	2.71989e-06	2.07034e-06	2.08094e-06	2.05538e-06	2.04814e-06	2.02714e-06	1.98663e-06	2.00154e-06	1.95746e-06	1.91358e-06	1.89348e-06	1.81366e-06	1.75407e-06	1.72665e-06	1.61555e-06	1.44034e-06	1.27489e-06
1350.04	14.7152	1.58168e-06	7.69802e-07	7.39831e-07	7.78421e-07	7.16996e-07	7.07921e-07	7.73122e-07	7.39001e-07	7.09081e-07	6.15674e-07	6.16286e-07	6.36692e-07	5.71132e-07	5.11437e-07	4.88211e-07	3.84643e-07	3.29004e-07
1361.33	15.4178	2.01136e-08	1.92096e-08	2.1023e-08	1.3441e-08	2.05873e-08	1.91658e-08	1.49844e-08	1.58991e-08	9.38091e-09	1.72716e-08	1.10067e-08	3.89578e-08	2.63084e-08	8.54801e-09	2.44562e-08	2.1547e-08	9.54227e-09
1373.13	14.528	2.02974e-07	1.61011e-07	1.15484e-07	1.07241e-07	9.91573e-08	1.47855e-07	1.04302e-07	1.9364e-07	1.14174e-07	1.19613e-07	1.36838e-07	9.439e-08	9.17645e-08	1.11508e-07	1.31187e-07	1.12124e-07	1.15115e-07
1383.51	15.022	4.20073e-08	5.20153e-08	2.65104e-08	2.26118e-08	3.10611e-08	1.28933e-08	1.75284e-08	4.52764e-08	1.14332e-08	1.82126e-08	3.74301e-08	1.48862e-08	1.14941e-08	3.20004e-08	3.3197e-08	1.84996e-08	2.0143e-08
1394.92	14.3512	0	0	1.51693e-09	1.48992e-09	0	1.52855e-09	2.59291e-09	5.47764e-09	1.57594e-09	1.68412e-09	2.8064e-09	1.68292e-09	2.3247e-09	0	3.14799e-09	0	7.48013e-09
1405.76	14.603	1.22642e-10	0	1.32707e-08	0	0	0	-3.09052e-09	1.30644e-09	7.54135e-10	0	0	0	2.44388e-09	0	2.99217e-09	0	1.22341e-09
1416.7	14.4414	3.10486e-11	0	8.87634e-10	1.96189e-08	0	0	1.54341e-08	0	1.76901e-09	0	9.31272e-10	1.5618e-08	-1.65367e-08	1.09972e-09	1.78322e-09	0	0
1427.45	14.3086	7.31823e-05	6.40313e-05	6.39587e-05	6.3817e-05	6.37138e-05	6.36045e-05	6.35063e-05	6.32193e-05	6.2968e-05	6.26916e-05	6.20885e-05	6.14514e-05	6.0716e-05	5.94633e-05	5.67708e-05	5.35745e-05	5.02851e-05
1438.5	14.7756	0.000244308	0.000178963	0.000178169	0.000177316	0.000176509	0.000175571	0.000174829	0.000173068	0.000171367	0.000169502	0.000165769	0.000161932	0.000158036	0.000151778	0.000140186	0.000127861	0.000116431
1449.25	14.0094	3.73915e-05	2.63507e-05	2.61901e-05	2.6e-05	2.58674e-05	2.56926e-05	2.54881e-05	2.51182e-05	2.48314e-05	2.44023e-05	2.36723e-05	2.28816e-05	2.21596e-05	2.10142e-05	1.8885e-05	1.6709e-05	1.48033e-05
1459.41	13.9458	1.03481e-06	6.32057e-07	6.7651e-07	6.34685e-07	6.101e-07	6.25515e-07	6.36858e-07	5.81736e-07	5.96228e-07	5.74791e-07	5.73567e-07	5.45435e-07	4.9267e-07	3.88571e-07	4.66699e-07	3.32185e-07	2.71403e-07
1470.03	14.5203	6.23999e-06	4.96635e-06	4.96355e-06	4.97509e-06	4.96538e-06	4.88834e-06	4.90285e-06	4.82469e-06	4.81754e-06	4.7272e-06	4.64814e-06	4.55351e-06	4.45575e-06	4.26078e-06	3.96685e-06	3.64708e-06	3.32561e-06
1480.99	14.3435	5.89463e-06	4.59226e-06	4.61671e-06	4.55126e-06	4.49583e-06	4.51097e-06	4.51721e-06	4.40393e-06	4.37035e-06	4.33709e-06	4.26939e-06	4.16236e-06	4.01146e-06	3.82372e-06	3.55976e-06	3.25321e-06	2.9494e-06
1491.53	14.1138	2.38638e-06	1.74856e-06	1.73521e-06	1.74065e-06	1.69787e-06	1.69679e-06	1.70305e-06	1.67073e-06	1.68484e-06	1.60654e-06	1.51931e-06	1.51814e-06	1.3867e-06	1.38755e-06	1.25978e-06	1.11074e-06	9.98123e-07
1502.1	14.2618	1.44326e-06	1.16636e-06	1.13526e-06	1.14301e-06	1.12078e-06	1.12768e-06	1.15613e-06	1.10739e-06	1.11008e-06	1.04164e-06	1.03805e-06	1.06845e-06	9.62709e-07	9.58957e-07	8.84186e-07	7.81603e-07	7.13206e-07
1512.73	14.1849	2.39699e-08	2.16332e-08	1.22889e-08	2.92202e-08	3.03826e-08	1.89647e-08	2.50596e-08	2.11333e-08	8.02221e-09	1.32798e-08	3.09272e-08	5.69968e-24	1.02504e-08	8.72485e-09	4.78855e-10	9.8131e-09	1.80681e-09
1523.31	14.1186	2.56132e-06	1.93685e-06	1.88444e-06	1.88832e-06	1.87371e-06	1.85197e-06	1.86697e-06	1.8125e-06	1.76678e-06	1.71568e-06	1.69222e-06	1.59463e-06	1.56432e-06	1.48567e-06	1.27563e-06	1.16349e-06	1.01724e-06
1533.88	14.0897	2.99423e-05	2.38632e-05	2.37073e-05	2.36291e-05	2.34454e-05	2.33159e-05	2.31653e-05	2.28628e-05	2.25746e-05	2.23254e-05	2.16945e-05	2.1146e-05	2.05114e-05	1.95476e-05	1.78843e-05	1.61332e-05	1.45097e-05
1544.35	13.9804	1.65494e-05	1.32949e-05	1.31782e-05	1.31411e-05	1.30346e-05	1.29751e-05	1.29006e-05	1.27036e-05	1.25648e-05	1.24298e-05	1.20822e-05	1.17859e-05	1.1455e-05	1.0872e-05	9.96877e-06	8.9947e-06	8.08743e-06
1554.88	14.0528	3.53031e-07	2.90143e-07	2.4731e-07	2.83979e-07	2.30373e-07	2.66847e-07	2.63116e-07	2.03468e-07	2.54877e-07	2.77074e-07	2.64631e-07	3.03085e-07	1.92268e-07	2.17493e-07	1.83456e-07	1.6526e-07	1.39104e-07
1565.38	13.924	5.08213e-05	3.97623e-05	3.9528e-05	3.9273e-05	3.89975e-05	3.87578e-05	3.84789e-05	3.79758e-05	3.74657e-05	3.6851e-05	3.59043e-05	3.48353e-05	3.36952e-05	3.21858e-05	2.90459e-05	2.59137e-05	2.30418e-05
1575.67	13.7729	0.000192872	0.000153548	0.000152604	0.000151704	0.000150771	0.000149871	0.000148909	0.000147055	0.000145144	0.000143232	0.000139411	0.000135478	0.000131647	0.000125577	0.000114458	0.000102759	9.19551e-05
1585.92	13.7984	4.27821e-05	3.37187e-05	3.35338e-05	3.33061e-05	3.30573e-05	3.2855e-05	3.26433e-05	3.22072e-05	3.17808e-05	3.13089e-05	3.04154e-05	2.94875e-05	2.86464e-05	2.71256e-05	2.46461e-05	2.19808e-05	1.95348e-05
1596.24	13.7969	5.80593e-05	4.5956e-05	4.57285e-05	4.54609e-05	4.51457e-05	4.48436e-05	4.45412e-05	4.39938e-05	4.34254e-05	4.28565e-05	4.16823e-05	4.04593e-05	3.93089e-05	3.74217e-05	3.39673e-05	3.03388e-05	2.70519e-05
1606.5	13.7232	0.000185242	0.000148593	0.00014776	0.000146893	0.000146026	0.000145143	0.000144251	0.000142473	0.000140704	0.000138881	0.00013528	0.00013159	0.000127868	0.000122139	0.00011137	9.99833e-05	8.94652e-05
1616.86	13.8942	5.28928e-05	4.12142e-05	4.09397e-05	4.06707e-05	4.03581e-05	4.00995e-05	3.97871e-05	3.92356e-05	3.86393e-05	3.80856e-05	3.69063e-05	3.57825e-05	3.46151e-05	3.28074e-05	2.95124e-05	2.6124e-05	2.30255e-05
1627.04	13.4867	4.21852e-06	3.2068e-06	3.18785e-06	3.14439e-06	3.15466e-06	3.11304e-06	3.09383e-06	3.04881e-06	2.9709e-06	2.96238e-06	2.84674e-06	2.72116e-06	2.60203e-06	2.5619e-06	2.22243e-06	1.93153e-06	1.66901e-06
1637.06	13.4903	1.62275e-05	1.30163e-05	1.29175e-05	1.28684e-05	1.27904e-05	1.26697e-05	1.2597e-05	1.24685e-05	1.23052e-05	1.2185e-05	1.18669e-05	1.14708e-05	1.1117e-05	1.07315e-05	9.65577e-06	8.60407e-06	7.66865e-06
1647.21	13.4457	3.1279e-05	2.55136e-05	2.53739e-05	2.51997e-05	2.5085e-05	2.49597e-05	2.4825e-05	2.44763e-05	2.41744e-05	2.39499e-05	2.33827e-05	2.27462e-05	2.2074e-05	2.11626e-05	1.93418e-05	1.73717e-05	1.55536e-05
1656.95	12.8478	7.81067e-06	6.05402e-06	6.07824e-06	5.9946e-06	5.94245e-06	5.90563e-06	5.90148e-06	5.7986e-06	5.67633e-06	5.63105e-06	5.48714e-06	5.30251e-06	5.11791e-06	4.78997e-06	4.32711e-06	3.80145e-06	3.33571e-06
1667.11	13.578	1.93841e-06	1.3918e-06	1.43341e-06	1.44768e-06	1.42553e-06	1.41604e-06	1.38016e-06	1.36583e-06	1.34002e-06	1.31541e-06	1.23924e-06	1.18231e-06	1.22789e-06	1.12306e-06	9.98299e-07	8.89089e-07	7.69888e-07
1677.32	13.0764	4.18368e-07	3.09134e-07	3.22203e-07	2.78728e-07	3.05051e-07	3.89884e-07	2.40336e-07	3.30833e-07	2.89127e-07	3.61175e-07	2.79908e-07	3.16442e-07	2.67627e-07	2.26719e-07	2.1884e-07	2.08803e-07	1.71542e-07
1687.34	13.101	9.49515e-08	1.13292e-07	4.38358e-08	8.33242e-08	1.28477e-07	7.89739e-08	2.31907e-08	1.40368e-07	1.03193e-07	4.80968e-08	9.93685e-08	1.29725e-07	9.44183e-08	7.77061e-08	7.42738e-08	4.33156e-08	5.46659e-08
1697.21	13.2224	1.69033e-08	6.91693e-09	1.53604e-08	0	1.81411e-08	8.24837e-09	3.76946e-09	1.81224e-08	2.30881e-08	0	0	7.79604e-09	0	4.66547e-09	-8.75428e-10	-2.94934e-09	-1.25685e-08
1707.02	13.2015	3.60472e-08	2.44248e-08	2.33011e-09	0	2.06101e-08	2.48819e-08	4.6541e-08	8.17828e-09	6.04422e-08	1.87026e-08	1.09167e-08	9.65726e-09	1.4566e-08	5.36636e-09	1.2865e-08	-5.96293e-09	2.7727e-09
1716.81	12.9751	4.35737e-09	0	0	0	1.12233e-08	1.62891e-08	1.20283e-08	7.53398e-09	2.47895e-08	1.70784e-08	0	4.92893e-24	-1.47912e-24	4.79636e-09	2.40669e-09	-2.04432e-09	-3.2414e-08
1726.58	12.8046	0	6.48474e-09	-1.39795e-24	8.82319e-09	0	2.24041e-08	1.15781e-08	5.72166e-09	0	0	0	0	2.11825e-09	6.56715e-09	8.85097e-10	4.21922e-09	0
1736.38	12.8313	0	5.30053e-09	0	0	0	2.18929e-08	2.24711e-08	0	0	0	0	0	-1.17382e-09	6.81389e-09	3.39057e-09	0	0
1746.1	13.0023	2.82108e-09	0	0	0	0	0	0	0	0	0	0	0	-1.1797e-09	1.4291e-09	0	0	0
1755.77	13.0233	2.20667e-07	1.36538e-07	1.29012e-07	5.32778e-08	1.11772e-07	1.37639e-07	1.37278e-07	7.91151e-08	1.05032e-07	1.22779e-07	7.31831e-08	1.35219e-07	7.11798e-08	1.0436e-07	9.04893e-08	7.69505e-08	5.40154e-08
1765.44	12.6574	1.50625e-07	1.13244e-07	4.44287e-08	5.29558e-08	1.34364e-07	6.74373e-08	5.76732e-08	7.04245e-08	1.23868e-07	8.88561e-08	3.65804e-08	5.56515e-08	6.89852e-08	5.42968e-08	4.75997e-08	2.71134e-08	3.53587e-08
1775.04	12.4278	2.43729e-08	1.07343e-08	2.06797e-08	4.46103e-08	1.83864e-08	1.86706e-08	4.29505e-24	0	7.57085e-09	0	2.45767e-08	5.20353e-09	1.50397e-08	9.44693e-09	1.24575e-08	1.5892e-08	2.08054e-08
1784.57	12.6008	1.43824e-07	2.08211e-08	9.32793e-08	1.34313e-07	1.67135e-07	1.11105e-07	4.25765e-08	9.672e-08	6.47693e-08	1.25278e-07	1.60062e-08	7.81519e-08	7.35327e-08	6.05021e-08	3.15669e-08	3.09336e-08	3.89636e-08
1793.88	12.697	1.31808e-07	4.92129e-08	1.29885e-07	1.23547e-07	1.22272e-07	1.28487e-07	5.27821e-08	1.00623e-07	1.25035e-07	9.59473e-08	7.39511e-08	8.38327e-08	6.30783e-08	5.55947e-08	3.65969e-08	6.01191e-08	2.02877e-08
1803.51	12.5221	8.40805e-08	5.31133e-08	8.55597e-09	4.03607e-08	3.17041e-08	5.39054e-08	8.9783e-09	1.40136e-08	3.40171e-08	2.25498e-08	9.27623e-09	1.53642e-08	2.08637e-08	1.78505e-08	3.2204e-08	2.43229e-24	9.94396e-09
1812.93	12.2902	5.24537e-08	0	6.87378e-10	0	1.44858e-08	0	0	6.00993e-09	1.81685e-09	9.69131e-09	5.57673e-09	1.0617e-08	1.26441e-08	1.58392e-08	0	1.27742e-08	4.47064e-09
1822.29	12.8994	0	0	0	1.25206e-08	0	0	0	0	2.97579e-09	0	0	4.48234e-09	0	0	0	0	0
1831.86	12.321	0	0	0	0	0	0	0	0	0	0	0	0	0	0	0	0	0
1841.17	12.4709	0	0	0	0	0	0	0	0	0	0	0	0	0	0	0	0	0
1850.44	12.3586	0	0	0	0	0	0	0	0	0	0	0	0	0	0	0	0	0
1859.48	12.2035	0	0	0	0	0	0	0	0	0	3.4435e-08	0	0	0	1.4914e-08	2.5844e-08	0	1.2037e-09
1868.14	11.3546	6.92542e-08	1.57115e-07	1.89978e-07	2.20324e-07	1.93145e-07	1.91114e-07	1.43074e-07	1.6853e-07	1.84454e-07	2.47845e-07	1.59109e-07	1.97454e-07	1.75089e-07	2.31027e-07	2.54027e-07	1.98883e-07	2.0976e-07
1878.47	12.6107	5.51434e-05	3.26338e-05	3.25731e-05	3.24342e-05	3.24134e-05	3.23529e-05	3.22295e-05	3.20389e-05	3.18726e-05	3.17126e-05	3.12642e-05	3.07597e-05	3.01166e-05	2.91257e-05	2.69356e-05	2.41787e-05	2.19758e-05
1886.94	11.5635	3.21115e-05	2.25826e-05	2.25666e-05	2.24958e-05	2.24613e-05	2.2433e-05	2.23812e-05	2.22699e-05	2.21076e-05	2.20657e-05	2.17639e-05	2.14773e-05	2.10529e-05	2.04637e-05	1.91075e-05	1.74598e-05	1.59076e-05
1895.88	11.5962	3.3878e-06	2.06344e-06	2.11292e-06	2.13815e-06	2.09527e-06	2.07533e-06	2.10635e-06	2.07142e-06	2.06454e-06	2.10791e-06	2.049e-06	1.98782e-06	1.98407e-06	1.85492e-06	1.78442e-06	1.56681e-06	1.31823e-06
1904.73	12.5711	9.23646e-07	4.38042e-07	4.57318e-07	5.25682e-07	4.31899e-07	4.45771e-07	4.87108e-07	5.12518e-07	4.60754e-07	4.78e-07	4.26769e-07	3.94616e-07	5.05157e-07	3.53397e-07	5.38711e-07	3.57276e-07	3.41671e-07
1914.15	11.7418	6.00996e-07	2.77101e-07	3.09153e-07	2.88626e-07	4.1151e-07	3.33705e-07	2.97208e-07	2.9682e-07	3.06274e-07	3.25215e-07	2.89368e-07	2.32849e-07	2.75105e-07	2.78036e-07	2.98765e-07	1.58267e-07	2.08253e-07
1923.18	12.0039	5.42708e-07	2.78872e-07	2.79916e-07	2.81189e-07	3.50771e-07	3.02572e-07	2.6514e-07	2.85195e-07	3.09428e-07	3.21431e-07	1.99426e-07	2.71483e-07	2.65566e-07	2.09646e-07	1.67609e-07	1.30884e-07	7.71582e-08
1932.06	11.6661	3.75213e-06	1.74135e-06	1.71913e-06	1.65348e-06	1.69979e-06	1.6633e-06	1.61279e-06	1.60607e-06	1.54459e-06	1.51972e-06	1.39742e-06	1.40191e-06	1.34709e-06	1.17999e-06	1.02264e-06	8.11301e-07	5.70887e-07
1940.92	11.8169	0.000200047	0.000110778	0.000109754	0.000108652	0.000107645	0.000106576	0.000105489	0.000103385	0.000101247	9.90678e-05	9.47863e-05	9.04874e-05	8.61284e-05	7.95051e-05	6.73387e-05	5.48766e-05	4.50726e-05
1949.71	11.5385	0.000881414	0.000606753	0.000602832	0.000598898	0.000594893	0.000590917	0.000586887	0.000578752	0.000570487	0.000562061	0.000544856	0.000527054	0.000508925	0.000479829	0.000423643	0.000360995	0.000309126
1958.44	11.4733	0.00128505	0.000958102	0.000953171	0.000948095	0.000942969	0.000937836	0.000932599	0.000921945	0.000911069	0.000899921	0.000876674	0.000852148	0.000826687	0.000784815	0.000701082	0.00060397	0.000522357
1967.13	11.5707	0.000972433	0.000735462	0.000730782	0.000726131	0.00072138	0.000716627	0.000711876	0.000702256	0.000692549	0.000682734	0.000662673	0.000642056	0.000621303	0.000587833	0.000522246	0.000447739	0.000383493
1975.83	11.4434	0.000260232	0.000203179	0.000201853	0.000200606	0.000199302	0.000197965	0.000196612	0.000194062	0.000191339	0.000188628	0.000183139	0.000177519	0.000171912	0.000162934	0.000145214	0.000125069	0.00010696
1984.58	11.6345	4.80582e-05	3.75131e-05	3.72376e-05	3.69585e-05	3.6774e-05	3.65399e-05	3.6153e-05	3.56661e-05	3.51651e-05	3.46539e-05	3.35686e-05	3.25208e-05	3.1429e-05	2.97483e-05	2.64256e-05	2.26057e-05	1.92188e-05
1993.29	11.3157	0.000193649	0.000159778	0.000158984	0.000158047	0.000157179	0.000156416	0.000155573	0.000153828	0.000152159	0.000150388	0.000146786	0.000143014	0.000139243	0.00013296	0.000120161	0.000104835	9.06399e-05
2001.88	11.4422	0.00205157	0.00158693	0.00157857	0.00157011	0.0015616	0.00155291	0.00154415	0.0015264	0.00150823	0.00148956	0.00145094	0.00141005	0.0013672	0.00129653	0.00115405	0.0009863	0.000848274
2010.46	11.2577	0.00282912	0.0020424	0.00202866	0.00201484	0.00200087	0.00198691	0.00197274	0.00194431	0.00191541	0.00188606	0.00182601	0.0017638	0.00169993	0.0015967	0.00139542	0.00116905	0.000987968
2019.09	11.3366	0.00168768	0.00127076	0.00126243	0.00125405	0.00124562	0.00123721	0.00122871	0.00121159	0.00119426	0.00117674	0.00114086	0.00110384	0.00106621	0.00100532	0.000885471	0.000748364	0.000633194
2027.54	11.1218	0.000536898	0.000411688	0.000408723	0.000405683	0.000402649	0.000399582	0.000396543	0.000390437	0.00038433	0.000378165	0.000365786	0.000353172	0.000340763	0.000320909	0.000282162	0.000238421	0.000199519
2036.04	11.2636	0.000282143	0.000225512	0.000224122	0.000222617	0.000221242	0.000219708	0.000218263	0.000215348	0.000212402	0.000209444	0.000203486	0.000197374	0.000191346	0.000181647	0.000162338	0.000139951	0.000119359
2044.46	11.0174	0.00039285	0.000318528	0.000316664	0.000314749	0.000312906	0.000311051	0.000309137	0.000305343	0.00030149	0.00029763	0.000289784	0.000281686	0.000273685	0.000260727	0.000234565	0.000203704	0.000175193
2052.82	11.071	0.00101656	0.000798756	0.00079375	0.000788644	0.000783597	0.000778478	0.000773349	0.000763077	0.000752681	0.000742214	0.000720867	0.000698942	0.000677048	0.000641645	0.000570681	0.000487885	0.000414589
2061.17	10.9786	0.000766263	0.000614363	0.000610677	0.000606989	0.000603316	0.000599651	0.00059592	0.000588471	0.000580977	0.000573355	0.000557841	0.000541881	0.000525942	0.000500058	0.000447657	0.000385549	0.000329478
2069.56	11.1227	0.000775203	0.000606598	0.000602537	0.000598553	0.000594465	0.000590419	0.000586346	0.00057817	0.000569964	0.000561668	0.000544906	0.000527737	0.000510712	0.000483333	0.000428797	0.000365362	0.000308828
2077.8	10.9102	0.000424164	0.000336747	0.000334601	0.000332403	0.000330134	0.000327912	0.000325666	0.000321216	0.000316693	0.000312153	0.000302992	0.00029357	0.000284312	0.00026932	0.000239501	0.000204618	0.000172705
2086.15	11.0754	0.000294926	0.000230418	0.00022877	0.000227088	0.0002254	0.000223742	0.000222078	0.000218742	0.000215386	0.00021202	0.000205247	0.000198357	0.000191633	0.000180853	0.000159556	0.00013514	0.000112733
2094.44	10.8328	0.000134874	0.000104507	0.000103685	0.000102887	0.000102075	0.000101279	0.000100502	9.88838e-05	9.73212e-05	9.57196e-05	9.25158e-05	8.93117e-05	8.61461e-05	8.11446e-05	7.13368e-05	6.02127e-05	5.0035e-05
2102.57	10.8621	4.62486e-05	3.68918e-05	3.66061e-05	3.63423e-05	3.60518e-05	3.57904e-05	3.55524e-05	3.50587e-05	3.45514e-05	3.40515e-05	3.3034e-05	3.20124e-05	3.10235e-05	2.93488e-05	2.61839e-05	2.24702e-05	1.88332e-05
2110.82	10.851	2.7249e-05	2.23915e-05	2.22088e-05	2.19711e-05	2.19295e-05	2.17982e-05	2.16571e-05	2.13981e-05	2.11338e-05	2.08604e-05	2.03168e-05	1.9748e-05	1.91787e-05	1.82853e-05	1.64506e-05	1.42834e-05	1.22275e-05
2118.99	10.8112	1.24766e-05	9.87104e-06	9.82779e-06	9.83024e-06	9.78736e-06	9.71915e-06	9.64816e-06	9.50606e-06	9.37918e-06	9.24107e-06	8.96812e-06	8.67464e-06	8.40755e-06	7.99035e-06	7.10293e-06	6.11522e-06	5.20387e-06
2127.12	10.6388	2.74343e-06	2.0095e-06	2.13763e-06	2.06416e-06	2.04594e-06	2.01915e-06	2.01887e-06	1.96867e-06	1.94943e-06	1.91031e-06	1.84902e-06	1.84769e-06	1.75652e-06	1.67421e-06	1.47185e-06	1.18057e-06	1.03297e-06
2135.24	10.7428	1.84408e-06	1.51852e-06	1.44571e-06	1.35972e-06	1.42578e-06	1.41388e-06	1.41015e-06	1.39189e-06	1.37902e-06	1.34632e-06	1.28809e-06	1.25028e-06	1.21118e-06	1.11424e-06	9.9244e-07	8.58361e-07	8.52665e-07
2143.22	10.5323	5.04157e-06	4.09527e-06	3.9689e-06	3.98699e-06	3.95834e-06	3.92126e-06	3.90861e-06	3.84313e-06	3.80047e-06	3.74628e-06	3.63482e-06	3.54324e-06	3.43338e-06	3.31178e-06	3.02365e-06	2.64223e-06	2.15217e-06
2151.13	10.577	1.67664e-05	1.41379e-05	1.39901e-05	1.39279e-05	1.38696e-05	1.37911e-05	1.37129e-05	1.35634e-05	1.3414e-05	1.3269e-05	1.29943e-05	1.26839e-05	1.23902e-05	1.18932e-05	1.07917e-05	9.45011e-06	8.24411e-06
2159.29	10.8203	1.17281e-05	9.91606e-06	9.83669e-06	9.77239e-06	9.72714e-06	9.66859e-06	9.60997e-06	9.51679e-06	9.414e-06	9.31412e-06	9.09872e-06	8.91086e-06	8.6739e-06	8.3415e-06	7.63054e-06	6.7167e-06	5.77171e-06
2167.24	10.2622	9.64067e-06	7.90666e-06	7.88422e-06	7.82315e-06	7.78958e-06	7.73368e-06	7.69226e-06	7.58267e-06	7.50837e-06	7.39327e-06	7.23485e-06	7.02582e-06	6.83265e-06	6.48461e-06	5.90386e-06	5.05727e-06	4.36521e-06
2175.09	10.6874	3.44647e-06	2.73665e-06	2.73254e-06	2.71742e-06	2.70796e-06	2.68128e-06	2.65064e-06	2.60742e-06	2.58242e-06	2.55212e-06	2.47647e-06	2.41005e-06	2.35173e-06	2.24269e-06	1.98811e-06	1.77511e-06	1.46449e-06
2183.15	10.3148	7.58951e-07	6.00461e-07	5.96824e-07	5.84948e-07	5.90358e-07	5.70913e-07	5.78002e-07	5.64441e-07	5.62103e-07	5.42595e-07	5.22333e-07	5.14986e-07	5.33464e-07	4.64332e-07	4.29253e-07	3.36401e-07	3.09368e-07
2190.83	10.3889	8.08213e-07	6.7456e-07	6.60669e-07	6.55327e-07	6.66566e-07	6.51276e-07	6.3721e-07	6.53376e-07	6.10085e-07	6.32597e-07	5.9712e-07	6.01428e-07	5.51658e-07	5.32805e-07	4.46325e-07	2.6283e-07	3.23332e-07
2198.86	10.5417	2.23145e-07	1.91866e-07	1.71042e-07	1.53856e-07	1.43841e-07	1.83008e-07	1.7395e-07	1.67393e-07	1.54087e-07	1.26457e-07	1.29882e-07	1.66054e-07	1.40652e-07	1.15908e-07	1.82219e-07	1.48951e-07	7.63419e-08
2206.59	10.1254	1.62191e-07	1.33415e-07	1.14779e-07	8.66364e-08	1.06107e-07	1.08225e-07	1.08747e-07	1.13936e-07	1.01537e-07	9.45486e-08	1.06734e-07	8.75303e-08	9.1263e-08	4.55119e-08	1.45592e-07	3.0945e-08	6.71968e-08
2214.33	10.3834	3.19819e-07	2.17644e-07	2.27324e-07	2.26903e-07	2.26636e-07	2.3184e-07	2.25325e-07	2.06191e-07	2.06426e-07	1.95657e-07	2.10755e-07	2.49986e-07	2.01823e-07	1.69186e-07	1.48284e-07	7.26624e-08	1.46789e-07
2222.15	10.1301	2.21447e-07	1.72544e-07	1.65757e-07	1.7081e-07	1.7334e-07	1.5785e-07	1.64247e-07	1.65404e-07	1.39513e-07	1.5373e-07	1.27683e-07	1.84136e-07	1.92413e-07	1.00454e-07	5.28685e-08	7.55021e-08	8.8091e-08
2229.74	10.3142	1.24194e-07	1.22039e-07	1.19395e-07	1.04778e-07	1.20727e-07	9.5317e-08	1.33518e-07	1.07399e-07	7.24495e-08	1.16067e-07	8.62212e-08	1.22536e-07	6.69823e-08	1.01529e-07	7.50749e-08	6.2399e-08	7.37326e-08
2237.62	10.273	1.57777e-08	3.54389e-08	3.41841e-08	2.61088e-08	4.78208e-08	2.16067e-08	3.58858e-08	3.3545e-08	1.62287e-08	3.33851e-08	1.2796e-08	3.64477e-08	3.59647e-09	2.37239e-08	4.65353e-08	1.67976e-08	2.53012e-08
2245.2	10.1004	5.59102e-08	3.91242e-08	7.54228e-08	5.00462e-08	5.95568e-08	6.89495e-08	4.00842e-08	6.7932e-08	5.96401e-08	6.90842e-08	7.4307e-08	4.46756e-08	2.4188e-08	3.04672e-08	5.68375e-08	7.87712e-08	1.28454e-08
2252.83	10.165	1.9761e-07	1.61049e-07	1.73273e-07	1.43237e-07	1.6571e-07	1.6917e-07	1.60177e-07	1.54751e-07	1.46481e-07	1.37657e-07	1.56343e-07	1.23699e-07	1.28385e-07	9.64248e-08	1.28615e-07	1.20615e-07	7.49341e-08
2260.58	10.1894	9.12134e-08	1.03693e-07	1.02217e-07	1.21009e-07	1.17027e-07	1.04499e-07	1.51837e-07	1.08485e-07	1.07618e-07	1.3506e-07	8.28436e-08	8.26574e-08	1.50557e-07	5.08451e-08	0	3.19021e-08	7.74073e-08
2268.02	9.94387	1.0107e-08	5.57317e-08	4.15951e-08	2.41763e-08	2.68712e-08	4.72308e-08	2.84971e-08	5.13472e-08	3.87316e-08	3.36029e-08	0	4.25089e-08	7.0231e-08	2.17376e-08	3.15769e-08	6.96508e-08	5.28445e-08
2275.74	10.1886	1.15613e-07	7.46695e-08	6.05206e-08	8.23613e-08	4.39554e-08	4.29498e-08	6.54928e-08	4.03354e-08	6.88823e-08	7.60993e-08	3.16946e-08	6.99916e-08	1.63957e-07	1.04796e-07	7.09009e-08	6.64837e-08	2.89976e-08
2283.2	9.78521	2.58849e-08	2.58882e-08	7.36457e-09	5.28187e-08	2.2058e-08	7.74854e-09	6.18655e-08	3.18523e-08	1.35317e-08	1.69688e-08	4.83015e-08	3.43562e-08	9.81844e-09	2.10019e-08	0	-2.54149e-08	3.69185e-08
2290.54	10.0038	0	2.14113e-08	3.95858e-09	1.68254e-08	1.98896e-08	1.77452e-08	2.57647e-08	5.20345e-09	5.53107e-09	8.97279e-10	1.09223e-08	1.58786e-08	2.61884e-08	0	0	0	-5.89569e-09
2298.27	9.97127	0	0	-3.40761e-24	8.92492e-09	0	6.50989e-09	1.94428e-08	1.6372e-08	6.89031e-09	0	1.62427e-08	0	2.47425e-08	0	0	0	0
2305.44	9.63447	0	4.48369e-09	0	3.01088e-24	0	8.83112e-09	1.45343e-08	2.97484e-09	3.42291e-09	0	1.48953e-08	0	2.46701e-08	0	0	0	1.31599e-08
2312.87	10.1359	0	4.37382e-09	0	1.26247e-08	0	2.56177e-24	0	9.0694e-09	0	0	6.23432e-09	0	0	0	0	0	0
2320.56	9.74905	0	0	0	0	0	1.12442e-08	0	0	0	1.18268e-08	-5.75356e-09	0	7.26026e-09	0	0	0	9.04723e-09
2327.54	9.65826	0	0	0	5.36689e-09	0	9.60273e-09	0	0	0	0	-3.96506e-09	0	9.84811e-09	0	0	0	6.58401e-09
2335.15	10.0542	0	0	5.0675e-09	0	0	0	0	0	0	0	-1.2365e-08	0	0	0	0	-1.02176e-08	0
2342.53	9.56876	0	0	0	0	0	0	0	0	0	2.20601e-08	0	0	0	0	0	9.39592e-09	0
2349.51	9.55708	0	0	3.91165e-09	0	0	0	0	0	0	0	0	0	0	0	0	6.83204e-09	0
2356.96	9.92805	0	-3.21618e-09	3.35719e-09	0	0	0	0	0	0	0	1.35147e-08	2.02487e-08	0	0	0	1.05428e-09	0
2364.29	9.46855	0	0	1.48769e-09	1.18051e-08	-1.19185e-08	0	0	0	1.42667e-08	0	1.76262e-08	2.35809e-08	0	0	0	7.94616e-09	0
2371.27	9.49267	0	0	0	1.03742e-08	-4.66777e-09	4.05653e-08	1.92582e-08	0	0	0	0	0	0	0	0	0	0
2378.44	9.61255	0	0	0	-1.45484e-24	-3.58499e-09	2.4582e-09	0	0	0	-9.0593e-09	0	0	0	0	0	3.5664e-09	0
2385.73	9.63909	0	0	0	0	0	3.24176e-09	0	0	1.48356e-08	-2.45634e-08	0	0	0	0	0	2.00752e-08	1.96826e-08
2392.76	9.29032	0	0	-1.29342e-08	0	0	0	0	0	3.18482e-08	-2.22315e-08	-2.52171e-08	0	0	0	3.26447e-08	-7.11278e-09	0
2399.73	9.60672	0	0	0	5.1737e-09	0	0	0	0	1.45232e-08	0	0	0	0	0	0	1.39374e-09	0
2407.24	9.64439	0	0	-5.32266e-09	8.56681e-09	7.97586e-09	0	0	0	0	0	0	0	2.05932e-08	0	0	-1.61147e-09	0
2414.09	8.96147	0	1.50901e-08	-6.07989e-09	0	0	0	9.27825e-09	0	0	0	0	0	0	0	0	-6.89824e-09	0
2420.91	9.61238	0	0	0	0	-2.25185e-09	0	1.64657e-08	0	0	0	0	0	0	0	0	-3.91598e-09	0
2428.33	9.44559	0	8.91435e-09	0	1.82483e-08	0	0	0	0	0	8.714e-09	-5.12542e-09	0	0	0	0	-3.90422e-09	0
2435.22	9.3097	1.52397e-08	0	7.75933e-09	0	0	0	8.61295e-09	-1.21447e-08	1.83368e-08	1.9693e-08	2.57534e-08	0	0	0	8.63215e-09	-1.24795e-09	0
2442.07	8.81877	9.62549e-09	-1.17633e-24	5.3502e-09	0	5.29128e-24	0	5.98904e-09	5.79895e-09	2.17099e-08	0	1.83038e-08	3.67275e-09	0	2.04133e-08	0	-3.52401e-09	1.57929e-08
2448.81	9.38408	2.62293e-09	0	0	0	0	0	0	0	0	2.26245e-08	0	0	5.53045e-08	0	0	0	1.58721e-08
2456.2	9.35962	3.93836e-08	6.17592e-09	0	0	0	0	0	1.53395e-08	0	1.95844e-08	0	0	5.9922e-08	1.65315e-08	0	-1.61412e-08	0
2462.72	8.86375	2.30778e-08	1.04241e-08	0	9.37613e-09	0	2.34425e-08	0	6.43867e-08	0	0	3.17623e-08	0	2.35294e-08	0	0	1.84433e-08	-1.1317e-08
2469.32	9.10723	7.90166e-08	8.70291e-08	1.07739e-08	1.36885e-08	3.57545e-08	2.76323e-08	4.06748e-08	6.74632e-08	4.02613e-08	2.46042e-08	6.04798e-08	3.34663e-08	1.32698e-09	2.56145e-08	0	1.13977e-08	3.25778e-08
2476.64	9.57509	1.1126e-07	2.96738e-08	0	2.02199e-08	1.7512e-08	2.97387e-08	5.04874e-08	3.75833e-09	5.3263e-08	0	0	3.84645e-08	7.72113e-08	4.63078e-08	2.38698e-09	0	1.70902e-08
2483.46	8.89409	3.37743e-06	2.4357e-06	2.36533e-06	2.4044e-06	2.3465e-06	2.34922e-06	2.34337e-06	2.22016e-06	2.26302e-06	2.20702e-06	2.04881e-06	1.97194e-06	1.98618e-06	1.89916e-06	1.57509e-06	1.33001e-06	1.01443e-06
2489.9	8.98538	3.89902e-06	2.68735e-06	2.63568e-06	2.61609e-06	2.50041e-06	2.56301e-06	2.55856e-06	2.45369e-06	2.51149e-06	2.37933e-06	2.32238e-06	2.24145e-06	2.10756e-06	2.18106e-06	1.779e-06	1.45554e-06	1.21198e-06
2496.76	9.439	1.74532e-06	1.38755e-06	1.4237e-06	1.33591e-06	1.3445e-06	1.38299e-06	1.29878e-06	1.32115e-06	1.32868e-06	1.2487e-06	1.1993e-06	1.26391e-06	1.17423e-06	1.11602e-06	9.39863e-07	7.7963e-07	6.27709e-07
