# Supplementary material for: Towards global carbon transparency: Spaceborne imaging spectroscopy enables precise CO2 emission quantification at facility scale
Source: Research Square preprint supplement (doi:10.21203/rs.3.rs-5913782/v1), 2025-01-29
Supplement: Supplementary file 27 [file Esun.xlsx]

## Sheet: Sheet1
(CM-1)	nm	MCebKur MChKur	MNewKur	MthKur	MoldKur	MODWherli_WMO
50000	200	0.00567	0.00567	0.00567	0.00784		0.00452491	UNITS: W.M-2.nm-1
49999	200.004	0.00567	0.00567	0.00567	0.00784		0.00452473
49998	200.008	0.00567	0.00567	0.00567	0.00784		0.00452455
49997	200.012	0.00567	0.00567	0.00567	0.00784		0.00452437
49996	200.016	0.00456	0.00456	0.00456	0.00784		0.00452419
49995	200.02	0.00398	0.00398	0.00398	0.00784		0.0040741
49994	200.024	0.00316	0.00316	0.00316	0.00785		0.00362406
49993	200.028	0.00277	0.00277	0.00277	0.00785		0.00329901
49992	200.032	0.00297	0.00297	0.00297	0.00785		0.00312394
49991	200.036	0.00281	0.00281	0.00281	0.00785		0.00307383
49990	200.04	0.00275	0.00275	0.00275	0.00785		0.00314868
49989	200.044	0.00329	0.00329	0.00329	0.00785		0.00329848
49988	200.048	0.00389	0.00389	0.00389	0.00785		0.00344828
49987	200.052	0.0039	0.0039	0.0039	0.00785		0.0035231
49986	200.056	0.0079	0.00377	0.00377	0.00786		0.00357293
49985	200.06	0.00789	0.00336	0.00336	0.00786		0.00362275
49984	200.064	0.00788	0.0033	0.0033	0.00786		0.00374752
49983	200.068	0.00787	0.00325	0.00325	0.00786		0.00397222
49982	200.072	0.00787	0.00399	0.00399	0.00786	0.0065	0.00434678
49981	200.076	0.00786	0.00501	0.00501	0.00786	0.00699	0.00477128
49980	200.08	0.00785	0.00579	0.00579	0.00786	0.00678	0.0051208
49979	200.084	0.00784	0.00589	0.00589	0.00786	0.00731	0.00532042
49978	200.088	0.00784	0.00611	0.00611	0.00787	0.00892	0.00537016
49977	200.092	0.00783	0.00549	0.00549	0.00787	0.0091	0.00519511
49976	200.096	0.00782	0.00461	0.00461	0.00787	0.00923	0.00494515
49975	200.1	0.00781	0.0044	0.0044	0.00787	0.00884	0.00469521
49974	200.104	0.0078	0.00427	0.00427	0.00787	0.00787	0.00452021
49973	200.108	0.0078	0.00392	0.00392	0.00787	0.007	0.00442013
49972	200.112	0.00779	0.00447	0.00447	0.00787	0.00542	0.00439498
49971	200.116	0.00778	0.00484	0.00484	0.00787	0.00514	0.00439481
49970	200.12	0.00777	0.00456	0.00456	0.00788	0.00509	0.00434469
49969	200.124	0.00777	0.0043	0.0043	0.00788	0.00471	0.00421968
49968	200.128	0.00776	0.00422	0.00422	0.00788	0.00486	0.00409467
49967	200.132	0.00775	0.00378	0.00378	0.00788	0.00519	0.00399464
49966	200.136	0.00774	0.00343	0.00343	0.00788	0.00561	0.00401945
49965	200.14	0.00774	0.00349	0.00349	0.00788	0.00655	0.00424397
49964	200.144	0.00773	0.00409	0.00409	0.00788	0.00626	0.00469314
49963	200.148	0.00772	0.00512	0.00512	0.00788	0.00824	0.00531701
49962	200.152	0.00771	0.00602	0.00602	0.00789	0.00842	0.00601573
49961	200.156	0.00771	0.00736	0.00736	0.00789	0.00935	0.00673934
49960	200.16	0.0077	0.00781	0.00781	0.00789	0.00972	0.0073381
49959	200.164	0.00769	0.00812	0.00812	0.00789	0.0108	0.00783697
49958	200.168	0.00768	0.00814	0.00814	0.00789	0.00961	0.00821102
49957	200.172	0.00767	0.00853	0.00853	0.00789	0.00981	0.00848522
49956	200.176	0.00767	0.00876	0.00876	0.00789	0.0104	0.00863461
49955	200.18	0.00766	0.00912	0.00912	0.00789	0.00952	0.00865922
49954	200.184	0.00765	0.00914	0.00914	0.00789	0.011	0.00855906
49953	200.188	0.00764	0.00883	0.00883	0.0079	0.00832	0.00830919
49952	200.192	0.00764	0.00788	0.00788	0.0079	0.00861	0.00798449
49951	200.196	0.00763	0.00708	0.00708	0.0079	0.00884	0.00770971
49950	200.2	0.00762	0.00711	0.00711	0.0079	0.00863	0.00760961
49949	200.204	0.00761	0.00693	0.00693	0.0079	0.00837	0.0076592
49948	200.208	0.00761	0.00733	0.00733	0.0079	0.00672	0.00785847
49947	200.212	0.00762	0.00835	0.00835	0.0079	0.00696	0.00815752
49946	200.216	0.00762	0.00932	0.00932	0.00791	0.00685	0.00835675
49945	200.22	0.00763	0.00943	0.00943	0.00791	0.00859	0.00833147
49944	200.224	0.00763	0.00875	0.00875	0.00791	0.00949	0.00800687
49943	200.228	0.00764	0.00768	0.00768	0.00791	0.0107	0.00748276
49942	200.232	0.00764	0.00667	0.00667	0.00791	0.01	0.0069088
49941	200.236	0.00765	0.00578	0.00578	0.00791	0.00943	0.00635984
49940	200.24	0.00765	0.00465	0.00465	0.00792	0.00844	0.00601043
49939	200.244	0.00766	0.00545	0.00545	0.00792	0.00744	0.00591043
49938	200.248	0.00766	0.00627	0.00627	0.00792	0.00546	0.00603488
49937	200.252	0.00767	0.00629	0.00629	0.00792	0.00606	0.00623414
49936	200.256	0.00768	0.00646	0.00646	0.00792	0.00745	0.00650818
49935	200.26	0.00768	0.00705	0.00705	0.00792	0.00851	0.0067822
49934	200.264	0.00769	0.0071	0.0071	0.00792	0.00975	0.00698139
49933	200.268	0.00769	0.00704	0.00704	0.00793	0.00878	0.00720551
49932	200.272	0.0077	0.00728	0.00728	0.00793	0.00826	0.00740467
49931	200.276	0.0077	0.00745	0.00745	0.00793	0.0102	0.00757889
49930	200.28	0.00771	0.00815	0.00815	0.00793	0.00888	0.00765337
49929	200.284	0.00771	0.00841	0.00841	0.00793	0.00855	0.00757828
49928	200.288	0.00772	0.00792	0.00792	0.00793	0.00901	0.00727884
49927	200.292	0.00772	0.00718	0.00718	0.00794	0.00984	0.00680495
49926	200.296	0.00773	0.0062	0.0062	0.00794	0.00872	0.00625631
49925	200.3	0.00774	0.0052	0.0052	0.00794	0.00909	0.0057825
49924	200.304	0.00774	0.00429	0.00429	0.00794	0.00721	0.00543334
49923	200.309	0.00775	0.00456	0.00456	0.00794	0.00658	0.00528358
49922	200.312	0.00775	0.00539	0.00539	0.00794	0.00701	0.00525845
49921	200.316	0.00776	0.00614	0.00614	0.00795	0.00795	0.00518348
49920	200.321	0.00776	0.00596	0.00596	0.00795	0.00762	0.00503375
49919	200.325	0.00777	0.00513	0.00513	0.00795	0.00886	0.00475945
49918	200.328	0.00777	0.00389	0.00389	0.00795	0.00923	0.00441041
49917	200.333	0.00778	0.00322	0.00322	0.00795	0.00929	0.00416107
49916	200.337	0.00779	0.00328	0.00328	0.00795	0.00772	0.00408615
49915	200.341	0.00779	0.00384	0.00384	0.00795	0.00676	0.00416073
49914	200.345	0.0078	0.00463	0.00463	0.00796	0.00595	0.00428513
49913	200.349	0.0078	0.00529	0.00529	0.00796	0.00717	0.00440953
49912	200.353	0.00781	0.0052	0.0052	0.00796	0.00668	0.00445917
49911	200.357	0.00781	0.00421	0.00421	0.00796	0.00783	0.00438426
49910	200.361	0.00782	0.00358	0.00358	0.00796	0.00863	0.00430936
49909	200.365	0.00782	0.00369	0.00369	0.00796	0.00927	0.00428428
49908	200.369	0.00782	0.00431	0.00431	0.00797	0.00787	0.0042841
49907	200.373	0.00782	0.00485	0.00485	0.00797	0.00701	0.00433375
49906	200.377	0.00782	0.00486	0.00486	0.00797	0.00849	0.00435848
49905	200.381	0.00782	0.0043	0.0043	0.00797	0.00861	0.0043583
49904	200.385	0.00782	0.00413	0.00413	0.00797	0.00921	0.00435813
49903	200.389	0.00783	0.00398	0.00398	0.00797	0.00925	0.00443266
49902	200.393	0.00783	0.00402	0.00402	0.00797	0.00949	0.00455699
49901	200.397	0.00783	0.00463	0.00463	0.00798	0.00936	0.00478092
49900	200.401	0.00783	0.00559	0.00559	0.00798	0.00947	0.00505462
49899	200.405	0.00783	0.0058	0.0058	0.00798	0.00999	0.0053034
49898	200.409	0.00783	0.00536	0.00536	0.00798	0.0088	0.00552727
49897	200.413	0.00783	0.00541	0.00541	0.00798	0.00992	0.00580091
49896	200.417	0.00784	0.00566	0.00566	0.00798	0.0088	0.00614922
49895	200.421	0.00784	0.00628	0.00628	0.00799	0.00843	0.00652239
49894	200.425	0.00784	0.00705	0.00705	0.00799	0.0077	0.00684574
49893	200.429	0.00784	0.00795	0.00795	0.00799	0.0089	0.00704461
49892	200.433	0.00784	0.00818	0.00818	0.00799	0.00857	0.00691987
49891	200.437	0.00784	0.00772	0.00772	0.00799	0.00803	0.00647156
49890	200.441	0.00784	0.0061	0.0061	0.00799	0.0094	0.00569972
49889	200.445	0.00785	0.00439	0.00439	0.008	0.00931	0.00477862
49888	200.449	0.00785	0.00313	0.00313	0.008	0.00774	0.00390736
49887	200.453	0.00785	0.00235	0.00235	0.008	0.00516	0.00318549
49886	200.457	0.00785	0.00198	0.00198	0.008	0.00465	0.00273742
49885	200.461	0.00785	0.00232	0.00232	0.008	0.00585	0.00256312
49884	200.465	0.00785	0.00253	0.00253	0.008	0.00649	0.00266255
49883	200.469	0.00785	0.00255	0.00255	0.008	0.00751	0.00291127
49882	200.473	0.00785	0.00286	0.00286	0.00801	0.00858	0.00328438
49881	200.477	0.00786	0.00376	0.00376	0.00801	0.0085	0.00375698
49880	200.481	0.00786	0.00438	0.00438	0.00801	0.00792	0.00422954
49879	200.485	0.00786	0.00497	0.00497	0.00801	0.00951	0.00467719
49878	200.489	0.00786	0.00548	0.00548	0.00801	0.0094	0.00514967
49877	200.493	0.00786	0.00529	0.00529	0.00801	0.00809	0.00559725
49876	200.497	0.00786	0.0055	0.0055	0.00802	0.00668	0.00609453
49875	200.501	0.00786	0.00636	0.00636	0.00802	0.00604	0.00669128
49874	200.505	0.00787	0.00737	0.00737	0.00802	0.00562	0.00731286
49873	200.509	0.00787	0.00824	0.00824	0.00802	0.00602	0.00783489
49872	200.513	0.00787	0.00916	0.00916	0.00802	0.00652	0.00823252
49871	200.517	0.00787	0.00933	0.00933	0.00802	0.00648	0.00840629
49870	200.521	0.00788	0.00874	0.00874	0.00802	0.0076	0.00833134
49869	200.525	0.00788	0.00786	0.00786	0.00803	0.00813	0.00805745
49868	200.529	0.00788	0.00759	0.00759	0.00803	0.00831	0.00770898
49867	200.533	0.00789	0.00744	0.00744	0.00803	0.00838	0.00733567
49866	200.537	0.00789	0.00676	0.00676	0.00803	0.00762	0.00696239
49865	200.542	0.00789	0.00644	0.00644	0.00803	0.00831	0.00666373
49864	200.546	0.0079	0.00666	0.00666	0.00803	0.00829	0.00646456
49863	200.549	0.0079	0.00604	0.00604	0.00804	0.00828	0.00633999
49862	200.554	0.0079	0.00554	0.00554	0.00804	0.00667	0.00633973
49861	200.558	0.00791	0.00606	0.00606	0.00804	0.00785	0.00658808
49860	200.562	0.00791	0.00677	0.00677	0.00804	0.00717	0.00698557
49859	200.566	0.00791	0.0073	0.0073	0.00804	0.00716	0.00740789
49858	200.57	0.00792	0.00827	0.00827	0.00804	0.00879	0.00778046
49857	200.574	0.00792	0.00912	0.00912	0.00805	0.0101	0.00800386
49856	200.578	0.00792	0.00902	0.00902	0.00805	0.0101	0.00790411
49855	200.582	0.00793	0.00804	0.00804	0.00805	0.00982	0.00758069
49854	200.586	0.00793	0.0068	0.0068	0.00805	0.0108	0.00715787
49853	200.59	0.00793	0.00604	0.00604	0.00805	0.0101	0.0068345
49852	200.594	0.00794	0.00553	0.00553	0.00805	0.00888	0.00670997
49851	200.598	0.00794	0.00586	0.00586	0.00806	0.0071	0.0068588
49850	200.602	0.00794	0.00699	0.00699	0.00806	0.00821	0.00725612
49849	200.606	0.00795	0.00838	0.00838	0.00806	0.0105	0.00772795
49848	200.61	0.00795	0.00909	0.00909	0.00806	0.0092	0.00810036
49847	200.614	0.00796	0.00908	0.00908	0.00806	0.01	0.00829881
49846	200.618	0.00796	0.00842	0.00842	0.00806	0.00941	0.00827363
49845	200.622	0.00796	0.00815	0.00815	0.00807	0.00924	0.00807454
49844	200.626	0.00797	0.00786	0.00786	0.00807	0.00815	0.00775125
49843	200.63	0.00797	0.00727	0.00727	0.00807	0.00767	0.00730377
49842	200.634	0.00797	0.00679	0.00679	0.00807	0.00862	0.0067818
49841	200.638	0.00798	0.00686	0.00686	0.00807	0.00848	0.00621019
49840	200.642	0.00798	0.0061	0.0061	0.00807	0.00917	0.00546475
49839	200.646	0.00798	0.00462	0.00462	0.00808	0.00816	0.00464485
49838	200.65	0.00799	0.00346	0.00346	0.00808	0.00821	0.00380018
49837	200.654	0.00799	0.00279	0.00279	0.00808	0.00871	0.00300525
49836	200.658	0.00799	0.00188	0.00188	0.00808	0.00892	0.00228986
49835	200.662	0.008	0.00118	0.00118	0.00808	0.00771	0.00174588
49834	200.666	0.008	0.00103	0.00103	0.00808	0.00804	0.00140807
49833	200.67	0.008	0.00111	0.00111	0.00809	0.0082	0.00123667
49832	200.674	0.008	0.000962	0.000962	0.00809	0.00862	0.00118448
49831	200.678	0.00801	0.000995	0.000995	0.00809	0.00885	0.00125395
49830	200.682	0.00801	0.0014	0.0014	0.00809	0.00893	0.00139543
49829	200.686	0.00801	0.00155	0.00155	0.00809	0.00926	0.0015369
49828	200.69	0.00802	0.00183	0.00183	0.00809	0.00823	0.00167339
49827	200.694	0.00802	0.00211	0.00211	0.0081	0.00709	0.00182229
49826	200.698	0.00802	0.00196	0.00196	0.0081	0.00542	0.00199848
49825	200.702	0.00802	0.00155	0.00155	0.0081	0.00575	0.00226899
49824	200.707	0.00803	0.002	0.002	0.0081	0.00625	0.00273062
49823	200.71	0.00803	0.00283	0.00283	0.0081	0.00703	0.00332626
49822	200.714	0.00803	0.00395	0.00395	0.0081	0.00728	0.00399631
49821	200.719	0.00804	0.00526	0.00526	0.00811	0.0072	0.00461667
49820	200.723	0.00804	0.0063	0.0063	0.00811	0.0065	0.00511288
49819	200.727	0.00804	0.00611	0.00611	0.00811	0.00763	0.00533605
49818	200.731	0.00804	0.00552	0.00552	0.00811	0.00805	0.00538547
49817	200.735	0.00805	0.00496	0.00496	0.00811	0.00939	0.0053108
49816	200.739	0.00805	0.00466	0.00466	0.00811	0.0103	0.00521133
49815	200.743	0.00805	0.005	0.005	0.00812	0.00942	0.00508704
49814	200.747	0.00805	0.00544	0.00544	0.00812	0.0096	0.00498758
49813	200.751	0.00806	0.00539	0.00539	0.00812	0.01	0.00483851
49812	200.755	0.00806	0.00487	0.00487	0.00812	0.00947	0.00466463
49811	200.759	0.00806	0.00409	0.00409	0.00812	0.0102	0.00449076
49810	200.763	0.00807	0.00362	0.00362	0.00812	0.00975	0.00434173
49809	200.767	0.00807	0.00414	0.00414	0.00813	0.00799	0.00429193
49808	200.771	0.00807	0.0044	0.0044	0.00813	0.00586	0.00431657
49807	200.775	0.00807	0.0044	0.0044	0.00813	0.0067	0.00436601
49806	200.779	0.00808	0.00484	0.00484	0.00813	0.00709	0.00453948
49805	200.783	0.00808	0.00449	0.00449	0.00813	0.00763	0.00468812
49804	200.787	0.00808	0.00416	0.00416	0.00813	0.00658	0.00486156
49803	200.791	0.00809	0.00497	0.00497	0.00814	0.00601	0.00508459
49802	200.795	0.00809	0.00603	0.00603	0.00814	0.00697	0.0052828
49801	200.799	0.00809	0.00571	0.00571	0.00814	0.00755	0.0054066
49800	200.803	0.00809	0.00555	0.00555	0.00814	0.00782	0.00553038
49799	200.807	0.0081	0.00564	0.00564	0.00814	0.00806	0.00560455
49798	200.811	0.0081	0.00531	0.00531	0.00814	0.00803	0.00560433
49797	200.815	0.0081	0.00533	0.00533	0.00815	0.00742	0.00555451
49796	200.819	0.0081	0.00617	0.00617	0.00815	0.00793	0.00543031
49795	200.823	0.00811	0.00602	0.00602	0.00815	0.00874	0.00520693
49794	200.827	0.00811	0.00503	0.00503	0.00815	0.00887	0.00485961
49793	200.831	0.00811	0.00427	0.00427	0.00815	0.00775	0.00458669
49792	200.835	0.00812	0.00349	0.00349	0.00815	0.00702	0.00443776
49791	200.839	0.00812	0.00317	0.00317	0.00816	0.00595	0.00446237
49790	200.844	0.00812	0.00416	0.00416	0.00816	0.00565	0.00473488
49789	200.848	0.00813	0.00567	0.00567	0.00816	0.00675	0.00510652
49788	200.852	0.00813	0.00649	0.00649	0.00816	0.0069	0.00542856
49787	200.856	0.00813	0.00651	0.00651	0.00816	0.00786	0.00560185
49786	200.86	0.00813	0.00572	0.00572	0.00816	0.00879	0.0056512
49785	200.864	0.00814	0.00519	0.00519	0.00817	0.00957	0.00562619
49784	200.868	0.00814	0.00497	0.00497	0.00817	0.00875	0.00565075
49783	200.872	0.00814	0.00503	0.00503	0.00817	0.00827	0.005824
49782	200.876	0.00815	0.00579	0.00579	0.00817	0.00926	0.00612115
49781	200.88	0.00815	0.007	0.007	0.00817	0.00904	0.00649262
49780	200.884	0.00815	0.0076	0.0076	0.00817	0.00877	0.00676494
49779	200.888	0.00816	0.00755	0.00755	0.00818	0.00907	0.00676466
49778	200.892	0.00816	0.00724	0.00724	0.00818	0.00892	0.00649183
49777	200.896	0.00816	0.00666	0.00666	0.00818	0.0077	0.00589693
49776	200.9	0.00816	0.00541	0.00541	0.00818	0.00787	0.00502953
49775	200.904	0.00817	0.00393	0.00393	0.00818	0.00899	0.00403833
49774	200.908	0.00817	0.0027	0.0027	0.00818	0.00927	0.00309675
49773	200.912	0.00817	0.00161	0.00161	0.00819	0.0108	0.00235344
49772	200.916	0.00818	0.000731	0.000731	0.00819	0.00726	0.00188515
49771	200.92	0.00818	0.000702	0.000702	0.00819	0.00598	0.00180085
49770	200.924	0.00818	0.00159	0.00159	0.00819	0.00532	0.00208811
49769	200.928	0.00819	0.00252	0.00252	0.0082	0.00423	0.00262552
49768	200.932	0.00819	0.00308	0.00308	0.0082	0.00505	0.00331892
49767	200.936	0.00819	0.00437	0.00437	0.0082	0.00539	0.00406179
49766	200.94	0.00819	0.00531	0.00531	0.00821	0.00681	0.00480461
49765	200.944	0.0082	0.00559	0.00559	0.00821	0.00774	0.00542355
49764	200.948	0.0082	0.00574	0.00574	0.00821	0.00827	0.00594337
49763	200.952	0.0082	0.00667	0.00667	0.00822	0.00829	0.00641363
49762	200.957	0.00821	0.00716	0.00716	0.00822	0.00897	0.00678481
49761	200.961	0.00821	0.00724	0.00724	0.00822	0.00965	0.00705691
49760	200.965	0.00821	0.00733	0.00733	0.00823	0.00928	0.00727946
49759	200.969	0.00822	0.00747	0.00747	0.00823	0.0113	0.00745248
49758	200.973	0.00822	0.00759	0.00759	0.00823	0.0102	0.00755122
49757	200.977	0.00822	0.00763	0.00763	0.00824	0.00857	0.00762518
49756	200.981	0.00822	0.00793	0.00793	0.00824	0.00657	0.00767439
49755	200.985	0.00823	0.00778	0.00778	0.00824	0.00704	0.00772359
49754	200.989	0.00823	0.00768	0.00768	0.00825	0.00752	0.00779754
49753	200.993	0.00823	0.00761	0.00761	0.00825	0.00783	0.00794575
49752	200.997	0.00824	0.00771	0.00771	0.00825	0.00811	0.0081682
49751	201.001	0.00824	0.00828	0.00828	0.00826	0.00916	0.00844013
49750	201.005	0.00824	0.00906	0.00906	0.00826	0.00951	0.00868729
49749	201.009	0.00825	0.00942	0.00942	0.00826	0.00883	0.00881069
49748	201.013	0.00825	0.00947	0.00947	0.00827	0.0101	0.00876084
49747	201.017	0.00825	0.00917	0.00917	0.00827	0.0108	0.00846352
49746	201.021	0.00826	0.00835	0.00835	0.00827	0.00991	0.00791877
49745	201.025	0.00826	0.00736	0.00736	0.00828	0.00999	0.00717609
49744	201.029	0.00826	0.00641	0.00641	0.00828	0.0098	0.00638399
49743	201.033	0.00827	0.00513	0.00513	0.00828	0.00966	0.00564144
49742	201.037	0.00827	0.00424	0.00424	0.00829	0.00954	0.00507214
49741	201.041	0.00827	0.00403	0.00403	0.00829	0.00915	0.00472556
49740	201.045	0.00827	0.00416	0.00416	0.00829	0.01	0.00455219
49739	201.049	0.00828	0.00475	0.00475	0.00829	0.00849	0.00452727
49738	201.054	0.00828	0.00491	0.00491	0.0083	0.00825	0.00452709
49737	201.058	0.00828	0.00464	0.00464	0.0083	0.00881	0.00452691
49736	201.062	0.00829	0.00456	0.00456	0.0083	0.00942	0.00455146
49735	201.066	0.00829	0.00415	0.00415	0.00831	0.00771	0.00457601
49734	201.07	0.00829	0.0041	0.0041	0.00831	0.00728	0.00467477
49733	201.074	0.0083	0.00482	0.00482	0.00831	0.00839	0.00487244
49732	201.078	0.0083	0.00537	0.00537	0.00832	0.00903	0.0051443
49731	201.082	0.0083	0.00523	0.00523	0.00832	0.0102	0.0054656
49730	201.086	0.00831	0.00591	0.00591	0.00832	0.00856	0.0058858
49729	201.09	0.00831	0.00601	0.00601	0.00833	0.00771	0.00635541
49728	201.094	0.00831	0.00658	0.00658	0.00833	0.00759	0.006825
49727	201.098	0.00832	0.00747	0.00747	0.00833	0.00897	0.00722036
49726	201.102	0.00832	0.0085	0.0085	0.00834	0.00757	0.00746733
49725	201.106	0.00832	0.00852	0.00852	0.00834	0.0085	0.00746703
49724	201.11	0.00832	0.00793	0.00793	0.00834	0.00957	0.00714531
49723	201.114	0.00833	0.00669	0.00669	0.00835	0.0093	0.00660111
49722	201.118	0.00833	0.00582	0.00582	0.00835	0.00835	0.00600751
49721	201.122	0.00833	0.00497	0.00497	0.00835	0.00679	0.00541396
49720	201.126	0.00834	0.00395	0.00395	0.00836	0.00712	0.00496878
49719	201.13	0.00834	0.00411	0.00411	0.00836	0.00785	0.00469667
49718	201.134	0.00834	0.00486	0.00486	0.00836	0.00772	0.00457288
49717	201.138	0.00835	0.00508	0.00508	0.00837	0.00717	0.0044244
49716	201.143	0.00835	0.00449	0.00449	0.00837	0.00647	0.00417706
49715	201.147	0.00835	0.00438	0.00438	0.00837	0.00676	0.00383087
49714	201.151	0.00835	0.00369	0.00369	0.00838	0.00807	0.00333643
49713	201.155	0.00836	0.00239	0.00239	0.00838	0.00916	0.00279261
49712	201.159	0.00836	0.00159	0.00159	0.00838	0.00831	0.00234273
49711	201.163	0.00836	0.00157	0.00157	0.00839	0.00698	0.00211282
49710	201.167	0.00836	0.00152	0.00152	0.00839	0.00569	0.00211026
49709	201.171	0.00837	0.00168	0.00168	0.00839	0.00424	0.00234492
49708	201.175	0.00837	0.00254	0.00254	0.0084	0.00418	0.00279204
49707	201.179	0.00837	0.0035	0.0035	0.0084	0.00617	0.0033602
49706	201.183	0.00838	0.00432	0.00432	0.0084	0.00673	0.00395302
49705	201.187	0.00838	0.00454	0.00454	0.00841	0.00613	0.00447167
49704	201.191	0.00838	0.00514	0.00514	0.00841	0.00677	0.00491617
49703	201.195	0.00838	0.00565	0.00565	0.00841	0.00752	0.00523712
49702	201.199	0.00839	0.00583	0.00583	0.00842	0.00723	0.00538512
49701	201.203	0.00839	0.00557	0.00557	0.00842	0.00777	0.00543431
49700	201.207	0.00839	0.00544	0.00544	0.00842	0.00812	0.00545879
49699	201.211	0.00839	0.00523	0.00523	0.00843	0.00694	0.00553267
49698	201.215	0.0084	0.00519	0.00519	0.00843	0.00739	0.00573003
49697	201.219	0.0084	0.00527	0.00527	0.00843	0.00632	0.00612496
49696	201.223	0.0084	0.00612	0.00612	0.00844	0.00619	0.00669273
49695	201.227	0.00841	0.00763	0.00763	0.00844	0.00715	0.00733454
49694	201.232	0.00841	0.0087	0.0087	0.00844	0.00813	0.00792691
49693	201.236	0.00841	0.00927	0.00927	0.00845	0.00898	0.00832169
49692	201.24	0.00841	0.00919	0.00919	0.00845	0.0102	0.0084942
49691	201.244	0.00842	0.00866	0.00866	0.00845	0.0106	0.00841979
49690	201.248	0.00842	0.00814	0.00814	0.00846	0.0104	0.00822192
49689	201.252	0.00842	0.00779	0.00779	0.00846	0.00928	0.0079747
49688	201.256	0.00843	0.00731	0.00731	0.00846	0.00837	0.00780156
49687	201.26	0.00843	0.00727	0.00727	0.00847	0.00641	0.00772718
49686	201.264	0.00843	0.00768	0.00768	0.00847	0.00728	0.00775156
49685	201.268	0.00843	0.00807	0.00807	0.00847	0.0085	0.0078253
49684	201.272	0.00844	0.00821	0.00821	0.00848	0.00911	0.00789904
49683	201.276	0.00844	0.00816	0.00816	0.00848	0.00959	0.00792341
49682	201.28	0.00844	0.00781	0.00781	0.00848	0.0098	0.00789841
49681	201.284	0.00845	0.00765	0.00765	0.00849	0.00987	0.00782404
49680	201.288	0.00845	0.00779	0.00779	0.00849	0.00944	0.00774969
49679	201.292	0.00845	0.00789	0.00789	0.00849	0.00854	0.00767534
49678	201.296	0.00846	0.00761	0.00761	0.00849	0.00959	0.00752696
49677	201.3	0.00846	0.00741	0.00741	0.0085	0.00982	0.00735391
49676	201.304	0.00846	0.00736	0.00736	0.0085	0.00985	0.00718088
49675	201.309	0.00847	0.00707	0.00707	0.0085	0.00934	0.00698318
49674	201.313	0.00847	0.00641	0.00641	0.00851	0.00979	0.00683485
49673	201.317	0.00847	0.00615	0.00615	0.00851	0.00987	0.00676056
49672	201.321	0.00848	0.00677	0.00677	0.00851	0.00886	0.00680963
49671	201.325	0.00848	0.00718	0.00718	0.00851	0.00816	0.00690804
49670	201.329	0.00848	0.00692	0.00692	0.00852	0.00753	0.00693244
49669	201.333	0.00849	0.00705	0.00705	0.00852	0.00883	0.00690749
49668	201.337	0.00849	0.00769	0.00769	0.00852	0.00923	0.00678387
49667	201.341	0.00849	0.00707	0.00707	0.00853	0.0092	0.00648758
49666	201.345	0.0085	0.00573	0.00573	0.00853	0.00948	0.00604332
49665	201.349	0.0085	0.00545	0.00545	0.00853	0.00907	0.00557443
49664	201.353	0.0085	0.00498	0.00498	0.00854	0.0101	0.00515491
49663	201.357	0.00851	0.00452	0.00452	0.00854	0.01	0.00485874
49662	201.361	0.00851	0.00414	0.00414	0.00854	0.0108	0.0046859
49661	201.365	0.00851	0.00416	0.00416	0.00854	0.01	0.00468571
49660	201.369	0.00852	0.00471	0.00471	0.00855	0.0111	0.00478417
49659	201.373	0.00852	0.00546	0.00546	0.00855	0.00973	0.00488261
49658	201.377	0.00852	0.00536	0.00536	0.00855	0.0111	0.00485776
49657	201.381	0.00853	0.00517	0.00517	0.00856	0.0104	0.00463564
49656	201.386	0.00853	0.00508	0.00508	0.00856	0.0101	0.00426561
49655	201.39	0.00854	0.00383	0.00383	0.00856	0.00789	0.00384629
49654	201.394	0.00854	0.00248	0.00248	0.00856	0.00729	0.00350097
49653	201.398	0.00854	0.00182	0.00182	0.00857	0.00784	0.00347617
49652	201.402	0.00855	0.00275	0.00275	0.00857	0.00817	0.00377187
49651	201.406	0.00855	0.00395	0.00395	0.00857	0.00929	0.0043387
49650	201.41	0.00855	0.00556	0.00556	0.00858	0.00908	0.0050041
49649	201.414	0.00856	0.00695	0.00695	0.00858	0.00865	0.00562014
49648	201.418	0.00856	0.00703	0.00703	0.00858	0.00956	0.00601429
49647	201.422	0.00856	0.00629	0.00629	0.00859	0.00858	0.00621123
49646	201.426	0.00857	0.00588	0.00588	0.00859	0.00914	0.00633422
49645	201.43	0.00857	0.0056	0.0056	0.00859	0.00673	0.0064079
49644	201.434	0.00857	0.00606	0.00606	0.00859	0.0065	0.00650622
49643	201.438	0.00857	0.00733	0.00733	0.0086	0.00695	0.00655525
49642	201.442	0.00857	0.00787	0.00787	0.0086	0.00858	0.00643177
49641	201.446	0.00858	0.00712	0.00712	0.0086	0.009	0.00608652
49640	201.45	0.00858	0.00571	0.00571	0.00861	0.00931	0.0056181
49639	201.454	0.00858	0.00405	0.00405	0.00861	0.00861	0.00512508
49638	201.459	0.00858	0.00338	0.00338	0.00861	0.00848	0.00482921
49637	201.463	0.00858	0.00391	0.00391	0.00861	0.00869	0.00477974
49636	201.467	0.00859	0.0049	0.0049	0.00862	0.01	0.00492737
49635	201.471	0.00859	0.00588	0.00588	0.00862	0.0111	0.00512425
49634	201.475	0.00859	0.00641	0.00641	0.00862	0.00927	0.00529649
49633	201.479	0.00859	0.00569	0.00569	0.00863	0.00872	0.00529628
49632	201.483	0.00859	0.00479	0.00479	0.00863	0.00931	0.00522217
49631	201.487	0.0086	0.00468	0.00468	0.00863	0.00819	0.00519732
49630	201.491	0.0086	0.00449	0.00449	0.00863	0.00629	0.00532027
49629	201.495	0.0086	0.0047	0.0047	0.00864	0.00599	0.00566487
49628	201.499	0.0086	0.00627	0.00627	0.00864	0.00624	0.00625574
49627	201.503	0.0086	0.00733	0.00733	0.00864	0.00657	0.00689581
49626	201.507	0.00861	0.00773	0.00773	0.00865	0.00707	0.00746195
49625	201.511	0.00861	0.00849	0.00849	0.00865	0.00788	0.00792954
49624	201.515	0.00861	0.00911	0.00911	0.00865	0.00896	0.0082001
49623	201.519	0.00861	0.00841	0.00841	0.00866	0.00849	0.00829826
49622	201.524	0.00861	0.00804	0.00804	0.00866	0.00939	0.00829793
49621	201.528	0.00862	0.00788	0.00788	0.00866	0.00786	0.00829759
49620	201.532	0.00862	0.00824	0.00824	0.00866	0.00989	0.00829726
49619	201.536	0.00862	0.00839	0.00839	0.00867	0.0112	0.00834616
49618	201.54	0.00862	0.00853	0.00853	0.00867	0.00962	0.00839507
49617	201.544	0.00862	0.00861	0.00861	0.00867	0.0104	0.00841935
49616	201.548	0.00863	0.00871	0.00871	0.00868	0.00926	0.00839439
49615	201.552	0.00863	0.00845	0.00845	0.00868	0.00853	0.0083202
49614	201.556	0.00863	0.00778	0.00778	0.00868	0.00833	0.00827064
49613	201.56	0.00863	0.00789	0.00789	0.00868	0.00812	0.00827031
49612	201.564	0.00863	0.00836	0.00836	0.00869	0.00655	0.00834381
49611	201.568	0.00864	0.00852	0.00852	0.00869	0.0072	0.00841731
49610	201.572	0.00864	0.00842	0.00842	0.00869	0.00709	0.00846619
49609	201.576	0.00864	0.00902	0.00902	0.0087	0.00812	0.00841663
49608	201.58	0.00864	0.009	0.009	0.0087	0.00772	0.00819481
49607	201.584	0.00864	0.00831	0.00831	0.0087	0.0073	0.00777614
49606	201.589	0.00864	0.00709	0.00709	0.00871	0.00767	0.00725908
49605	201.593	0.00865	0.00626	0.00626	0.00871	0.00771	0.00666824
49604	201.597	0.00865	0.006	0.006	0.00871	0.0083	0.00610206
49603	201.601	0.00865	0.0057	0.0057	0.00871	0.00845	0.00556052
49602	201.605	0.00865	0.0047	0.0047	0.00872	0.00891	0.00504363
49601	201.609	0.00865	0.00474	0.00474	0.00872	0.00945	0.00462519
49600	201.613	0.00865	0.00459	0.00459	0.00872	0.00925	0.00425599
49599	201.617	0.00865	0.00334	0.00334	0.00873	0.00902	0.00391142
49598	201.621	0.00866	0.00302	0.00302	0.00873	0.00957	0.00364067
49597	201.625	0.00866	0.0037	0.0037	0.00873	0.00844	0.00351753
49596	201.629	0.00866	0.00351	0.00351	0.00873	0.00899	0.0034436
49595	201.633	0.00866	0.00299	0.00299	0.00874	0.00881	0.00349265
49594	201.637	0.00866	0.0033	0.0033	0.00874	0.00697	0.00368927
49593	201.641	0.00866	0.00383	0.00383	0.00874	0.00669	0.00400885
49592	201.645	0.00866	0.00421	0.00421	0.00875	0.00758	0.00435299
49591	201.649	0.00866	0.00486	0.00486	0.00875	0.00714	0.0047217
49590	201.654	0.00867	0.00544	0.00544	0.00875	0.00834	0.00506578
49589	201.658	0.00867	0.00595	0.00595	0.00875	0.0093	0.00536066
49588	201.662	0.00867	0.00557	0.00557	0.00875	0.00815	0.00563093
49587	201.666	0.00867	0.00509	0.00509	0.00876	0.00733	0.00599952
49586	201.67	0.00867	0.0057	0.0057	0.00876	0.00644	0.00651561
49585	201.674	0.00867	0.0069	0.0069	0.00876	0.00605	0.00713001
49584	201.678	0.00867	0.00794	0.00794	0.00876	0.00633	0.00776893
49583	201.682	0.00868	0.00914	0.00914	0.00876	0.00759	0.00828489
49582	201.686	0.00868	0.0102	0.0102	0.00876	0.00972	0.00855497
49581	201.69	0.00868	0.00943	0.00943	0.00876	0.0108	0.00838255
49580	201.694	0.00868	0.00815	0.00815	0.00877	0.00958	0.00789059
49579	201.698	0.00868	0.00744	0.00744	0.00877	0.00897	0.00720202
49578	201.702	0.00868	0.00611	0.00611	0.00877	0.00843	0.00646435
49577	201.706	0.00868	0.00472	0.00472	0.00877	0.00752	0.00584963
49576	201.71	0.00868	0.00449	0.00449	0.00877	0.0079	0.00555447
49575	201.715	0.00869	0.00497	0.00497	0.00877	0.00799	0.00565255
49574	201.719	0.00869	0.00538	0.00538	0.00877	0.00666	0.0060701
49573	201.723	0.00869	0.00636	0.00636	0.00878	0.00661	0.00673337
49572	201.727	0.00869	0.00765	0.00765	0.00878	0.00843	0.00749487
49571	201.731	0.00869	0.00899	0.00899	0.00878	0.00828	0.00815802
49570	201.735	0.00869	0.00975	0.00975	0.00878	0.0101	0.0085754
49569	201.739	0.00869	0.00946	0.00946	0.00878	0.011	0.00869791
49568	201.743	0.00869	0.00894	0.00894	0.00878	0.0107	0.008501
49567	201.747	0.00869	0.00827	0.00827	0.00878	0.0113	0.00805843
49566	201.751	0.0087	0.00762	0.00762	0.00879	0.0112	0.00744392
49565	201.755	0.0087	0.00679	0.00679	0.00879	0.0109	0.00670663
49564	201.759	0.0087	0.0059	0.0059	0.00879	0.00974	0.00594483
49563	201.763	0.0087	0.00519	0.00519	0.00879	0.00821	0.00525678
49562	201.768	0.0087	0.0043	0.0043	0.00879	0.00786	0.00469161
49561	201.772	0.0087	0.00338	0.00338	0.00879	0.00834	0.00429843
49560	201.776	0.0087	0.00337	0.00337	0.0088	0.00652	0.00417544
49559	201.78	0.0087	0.00401	0.00401	0.0088	0.00589	0.0042244
49558	201.784	0.0087	0.00431	0.00431	0.0088	0.00587	0.00434702
49557	201.788	0.0087	0.00509	0.00509	0.0088	0.00708	0.0044942
49556	201.792	0.0087	0.00548	0.00548	0.0088	0.00815	0.00456769
49555	201.796	0.0087	0.00476	0.00476	0.0088	0.0105	0.00451839
49554	201.8	0.00871	0.00384	0.00384	0.0088	0.0102	0.00441999
49553	201.804	0.00871	0.00381	0.00381	0.00881	0.0087	0.00441981
49552	201.808	0.00871	0.00403	0.00403	0.00881	0.00956	0.0045424
49551	201.812	0.00871	0.00455	0.00455	0.00881	0.0081	0.00478774
49550	201.816	0.00871	0.00517	0.00517	0.00881	0.00952	0.00515582
49549	201.82	0.00871	0.00585	0.00585	0.00881	0.00912	0.00557297
49548	201.825	0.00871	0.00617	0.00617	0.00881	0.011	0.00594099
49547	201.829	0.00871	0.00656	0.00656	0.00881	0.0117	0.00618624
49546	201.833	0.00871	0.00658	0.00658	0.00882	0.0124	0.00630872
49545	201.837	0.00871	0.00666	0.00666	0.00882	0.0127	0.00628392
49544	201.841	0.00871	0.00628	0.00628	0.00882	0.0121	0.00616094
49543	201.845	0.00871	0.0061	0.0061	0.00882	0.011	0.00606251
49542	201.849	0.00871	0.0053	0.0053	0.00882	0.0101	0.00598864
49541	201.853	0.00872	0.00548	0.00548	0.00882	0.00974	0.00601294
49540	201.857	0.00872	0.00603	0.00603	0.00882	0.00968	0.00611086
49539	201.861	0.00872	0.00675	0.00675	0.00883	0.00838	0.00623332
49538	201.865	0.00872	0.00652	0.00652	0.00883	0.00913	0.00633123
49537	201.869	0.00872	0.00666	0.00666	0.00883	0.0105	0.00645366
49536	201.873	0.00872	0.00631	0.00631	0.00883	0.0118	0.00657609
49535	201.877	0.00872	0.00635	0.00635	0.00883	0.0111	0.00674758
49534	201.881	0.00872	0.00644	0.00644	0.00883	0.0102	0.00691906
49533	201.886	0.00872	0.00731	0.00731	0.00883	0.00963	0.00716413
49532	201.89	0.00872	0.00807	0.00807	0.00884	0.00931	0.00736011
49531	201.894	0.00872	0.00796	0.00796	0.00884	0.0084	0.00745794
49530	201.898	0.00872	0.00744	0.00744	0.00884	0.00848	0.00745764
49529	201.902	0.00872	0.00752	0.00752	0.00884	0.00804	0.00745734
49528	201.906	0.00872	0.00706	0.00706	0.00884	0.00841	0.00745704
49527	201.91	0.00872	0.00681	0.00681	0.00884	0.00852	0.00755485
49526	201.914	0.00872	0.00753	0.00753	0.00885	0.00684	0.00779982
49525	201.918	0.00872	0.00825	0.00825	0.00885	0.00626	0.00802025
49524	201.922	0.00872	0.00862	0.00862	0.00885	0.00715	0.00816708
49523	201.926	0.00872	0.00927	0.00927	0.00885	0.0087	0.0081177
49522	201.93	0.00872	0.00891	0.00891	0.00885	0.00946	0.00779857
49521	201.935	0.00872	0.00733	0.00733	0.00885	0.0109	0.00723423
49520	201.939	0.00872	0.00632	0.00632	0.00885	0.00904	0.00657184
49519	201.943	0.00872	0.00526	0.00526	0.00886	0.00886	0.00598308
49518	201.947	0.00872	0.00461	0.00461	0.00886	0.0084	0.00546792
49517	201.951	0.00872	0.00482	0.00482	0.00886	0.00728	0.00514896
49516	201.955	0.00872	0.00531	0.00531	0.00886	0.0078	0.00490357
49515	201.959	0.00872	0.00518	0.00518	0.00886	0.00964	0.00468272
49514	201.963	0.00872	0.00477	0.00477	0.00886	0.00947	0.00443737
49513	201.967	0.00872	0.00398	0.00398	0.00886	0.00946	0.00421656
49512	201.971	0.00872	0.00325	0.00325	0.00887	0.00761	0.00411833
49511	201.975	0.00872	0.00327	0.00327	0.00887	0.00685	0.00421622
49510	201.979	0.00872	0.00404	0.00404	0.00887	0.00603	0.00458373
49509	201.983	0.00872	0.00486	0.00486	0.00887	0.00764	0.0051718
49508	201.988	0.00872	0.00592	0.00592	0.00887	0.00938	0.00588238
49507	201.992	0.00872	0.00693	0.00693	0.00887	0.00952	0.00664192
49506	201.996	0.00872	0.00791	0.00791	0.00887	0.01	0.00732788
49505	202	0.00872	0.00814	0.00814	0.00888	0.0107	0.00784223
49504	202.004	0.00872	0.00864	0.00864	0.00888	0.0112	0.008234
49503	202.008	0.00872	0.00867	0.00867	0.00888	0.0114	0.00840521
49502	202.012	0.00872	0.00866	0.00866	0.00888	0.0104	0.00840487
49501	202.016	0.00872	0.00874	0.00874	0.00888	0.00947	0.00828201
49500	202.02	0.00872	0.00847	0.00847	0.00888	0.0101	0.00801216
49499	202.024	0.00872	0.00737	0.00737	0.00888	0.00976	0.00759532
49498	202.028	0.00872	0.00723	0.00723	0.00888	0.0103	0.00717851
49497	202.032	0.00872	0.00695	0.00695	0.00888	0.0101	0.00678623
49496	202.036	0.00872	0.00611	0.00611	0.00888	0.0108	0.00646748
49495	202.041	0.00872	0.00528	0.00528	0.00888	0.00904	0.00632024
49494	202.045	0.00872	0.00585	0.00585	0.00888	0.00752	0.00644246
49493	202.049	0.00872	0.00647	0.00647	0.00888	0.00542	0.00678514
49492	202.053	0.00872	0.00688	0.00688	0.00888	0.00714	0.00729924
49491	202.057	0.00872	0.00777	0.00777	0.00889	0.00728	0.00786228
49490	202.061	0.00872	0.00923	0.00923	0.00889	0.00781	0.00835181
49489	202.065	0.00872	0.00981	0.00981	0.00889	0.00902	0.0085474
49488	202.069	0.00872	0.00945	0.00945	0.00889	0.0101	0.00835113
49487	202.073	0.00873	0.00889	0.00889	0.00889	0.00965	0.00783652
49486	202.077	0.00873	0.00717	0.00717	0.00889	0.00754	0.00707708
49485	202.081	0.00873	0.00534	0.00534	0.00889	0.00683	0.00626871
49484	202.085	0.00873	0.00457	0.00457	0.00889	0.00813	0.00570528
49483	202.09	0.00873	0.00441	0.00441	0.00889	0.00958	0.0054602
49482	202.094	0.00873	0.00447	0.00447	0.00889	0.0095	0.0055824
49481	202.098	0.00873	0.00565	0.00565	0.00889	0.00916	0.00604735
49480	202.102	0.00873	0.00718	0.00718	0.00889	0.00993	0.00668364
49479	202.106	0.00873	0.00786	0.00786	0.00889	0.009	0.00727092
49478	202.11	0.00873	0.00816	0.00816	0.00889	0.00899	0.00771127
49477	202.114	0.00874	0.00857	0.00857	0.00889	0.00797	0.00793127
49476	202.118	0.00874	0.00861	0.00861	0.00889	0.00895	0.00780856
49475	202.122	0.00874	0.00805	0.00805	0.00889	0.00983	0.0073187
49474	202.126	0.00874	0.0074	0.0074	0.00889	0.0109	0.00655964
49473	202.131	0.00874	0.00596	0.00596	0.00889	0.0113	0.00558036
49472	202.135	0.00874	0.00426	0.00426	0.00889	0.00991	0.00450327
49471	202.139	0.00874	0.00278	0.00278	0.00889	0.00836	0.00352416
49470	202.143	0.00874	0.00169	0.00169	0.00889	0.0083	0.00276537
49469	202.147	0.00874	0.0013	0.0013	0.00889	0.00668	0.00237861
49468	202.151	0.00875	0.00177	0.00177	0.0089	0.00674	0.00237607
49467	202.155	0.00875	0.00209	0.00209	0.0089	0.00866	0.00266716
49466	202.159	0.00875	0.00295	0.00295	0.0089	0.00949	0.00320536
49465	202.163	0.00875	0.00419	0.00419	0.0089	0.00835	0.00386584
49464	202.167	0.00875	0.00489	0.00489	0.0089	0.00815	0.00450181
49463	202.171	0.00875	0.00515	0.00515	0.0089	0.00785	0.0050154
49462	202.175	0.00875	0.0058	0.0058	0.0089	0.00679	0.0053577
49461	202.179	0.00875	0.0064	0.0064	0.0089	0.00713	0.00545534
49460	202.184	0.00875	0.00607	0.00607	0.0089	0.00724	0.00530834
49459	202.188	0.00875	0.00509	0.00509	0.0089	0.00869	0.00501459
49458	202.192	0.00876	0.00423	0.00423	0.0089	0.00855	0.00467195
49457	202.196	0.00876	0.00384	0.00384	0.0089	0.0074	0.00435378
49456	202.2	0.00876	0.00366	0.00366	0.0089	0.00773	0.00410902
49455	202.204	0.00876	0.00395	0.00395	0.0089	0.00789	0.00393765
49454	202.208	0.00876	0.00416	0.00416	0.0089	0.00625	0.00379075
49453	202.212	0.00876	0.0041	0.0041	0.0089	0.00746	0.00364387
49452	202.216	0.00876	0.00357	0.00357	0.0089	0.00817	0.00347254
49451	202.22	0.00876	0.00273	0.00273	0.0089	0.00785	0.00335013
49450	202.225	0.00876	0.00249	0.00249	0.0089	0.00799	0.00332554
49449	202.229	0.00876	0.00329	0.00329	0.0089	0.00791	0.00342322
49448	202.233	0.00876	0.00386	0.00386	0.0089	0.0076	0.00354533
49447	202.237	0.00876	0.00405	0.00405	0.00891	0.00608	0.00364299
49446	202.241	0.00876	0.00419	0.00419	0.00891	0.00731	0.00376508
49445	202.245	0.00876	0.00393	0.00393	0.00891	0.00634	0.00386272
49444	202.249	0.00876	0.0029	0.0029	0.00891	0.00715	0.00396035
49443	202.253	0.00876	0.00346	0.00346	0.00891	0.00772	0.00420464
49442	202.257	0.00876	0.00482	0.00482	0.00891	0.00905	0.0045467
49441	202.261	0.00876	0.00539	0.00539	0.00891	0.00761	0.0048154
49440	202.265	0.00876	0.00538	0.00538	0.00891	0.00658	0.0049863
49439	202.269	0.00876	0.00598	0.00598	0.00891	0.00531	0.00503498
49438	202.274	0.00876	0.00536	0.00536	0.00891	0.00609	0.00491257
49437	202.278	0.00876	0.0041	0.0041	0.00891	0.0072	0.00464354
49436	202.282	0.00876	0.00375	0.00375	0.00891	0.00776	0.0044234
49435	202.286	0.00876	0.00434	0.00434	0.00891	0.0087	0.00432547
49434	202.29	0.00876	0.00397	0.00397	0.00891	0.0104	0.00430086
49433	202.294	0.00876	0.0039	0.0039	0.00891	0.00965	0.0044473
49432	202.298	0.00876	0.00485	0.00485	0.00891	0.00956	0.00476477
49431	202.302	0.00876	0.00522	0.00522	0.00891	0.00731	0.00510665
49430	202.306	0.00876	0.00517	0.00517	0.00891	0.00527	0.00535077
49429	202.31	0.00876	0.00609	0.00609	0.00891	0.00622	0.00549715
49428	202.315	0.00876	0.00668	0.00668	0.00891	0.0076	0.00542363
49427	202.319	0.00876	0.00567	0.00567	0.00891	0.00782	0.00500811
49426	202.323	0.00876	0.00491	0.00491	0.00891	0.0101	0.00439718
49425	202.327	0.00876	0.00375	0.00375	0.00892	0.0111	0.00366417
49424	202.331	0.00876	0.00225	0.00225	0.00892	0.0107	0.00290679
49423	202.335	0.00876	0.00132	0.00132	0.00892	0.0104	0.00236198
49422	202.339	0.00876	0.00126	0.00126	0.00892	0.0102	0.00215916
49421	202.343	0.00877	0.00138	0.00138	0.00892	0.00834	0.00232759
49420	202.347	0.00877	0.00211	0.00211	0.00892	0.00736	0.00285748
49419	202.351	0.00877	0.00333	0.00333	0.00892	0.00686	0.00361444
49418	202.355	0.00877	0.00474	0.00474	0.00892	0.00707	0.00449344
49417	202.359	0.00877	0.00616	0.00616	0.00892	0.0079	0.00529912
49416	202.364	0.00877	0.00667	0.00667	0.00892	0.0089	0.00598264
49415	202.368	0.00877	0.00668	0.00668	0.00892	0.0081	0.00649517
49414	202.372	0.00877	0.00683	0.00683	0.00892	0.00823	0.00690999
49413	202.376	0.00877	0.00709	0.00709	0.00892	0.00909	0.00727595
49412	202.38	0.00878	0.00734	0.00734	0.00892	0.00962	0.00759305
49411	202.384	0.00878	0.00801	0.00801	0.00893	0.00999	0.00783689
49410	202.388	0.00878	0.00872	0.00872	0.00893	0.0113	0.00795863
49409	202.392	0.00878	0.00891	0.00891	0.00893	0.0117	0.00783625
49408	202.396	0.00878	0.00823	0.00823	0.00893	0.0113	0.00749418
49407	202.4	0.00878	0.00703	0.00703	0.00894	0.0127	0.00703009
49406	202.405	0.00878	0.00575	0.00575	0.00894	0.0123	0.00656603
49405	202.409	0.00878	0.00523	0.00523	0.00894	0.0111	0.00627287
49404	202.413	0.00878	0.00533	0.00533	0.00894	0.00967	0.00624821
49403	202.417	0.00879	0.006	0.006	0.00894	0.00863	0.00639439
49402	202.421	0.00879	0.00706	0.00706	0.00895	0.0103	0.00658937
49401	202.425	0.00879	0.008	0.008	0.00895	0.00889	0.00668672
49400	202.429	0.00879	0.00776	0.00776	0.00895	0.00913	0.00658884
49399	202.433	0.00879	0.00651	0.00651	0.00895	0.0108	0.00627134
49398	202.437	0.00879	0.00508	0.00508	0.00895	0.00911	0.00592948
49397	202.441	0.00879	0.00462	0.00462	0.00896	0.00919	0.00570963
49396	202.446	0.00879	0.00488	0.00488	0.00896	0.00911	0.0056606
49395	202.45	0.00879	0.00551	0.00551	0.00896	0.00988	0.00573357
49394	202.454	0.00879	0.00659	0.00659	0.00896	0.0106	0.00580653
49393	202.458	0.0088	0.00727	0.00727	0.00896	0.0107	0.00570871
49392	202.462	0.0088	0.00624	0.00624	0.00897	0.0102	0.00529376
49391	202.466	0.0088	0.00494	0.00494	0.00897	0.00952	0.0046349
49390	202.47	0.0088	0.00353	0.00353	0.00897	0.00908	0.00390292
49389	202.474	0.0088	0.00223	0.00223	0.00897	0.00689	0.00319538
49388	202.478	0.0088	0.00145	0.00145	0.00897	0.00585	0.00268304
49387	202.482	0.0088	0.00219	0.00219	0.00898	0.00683	0.00243659
49386	202.487	0.0088	0.00259	0.00259	0.00898	0.00753	0.00234869
49385	202.491	0.0088	0.00262	0.00262	0.00898	0.00848	0.00232664
49384	202.495	0.00881	0.00248	0.00248	0.00898	0.00927	0.00231679
49383	202.499	0.00881	0.00235	0.00235	0.00898	0.00885	0.00232645
49382	202.503	0.00881	0.00212	0.00212	0.00899	0.00827	0.00238001
49381	202.507	0.00881	0.00185	0.00185	0.00899	0.00683	0.00256035
49380	202.511	0.00881	0.00205	0.00205	0.00899	0.00832	0.00295038
49379	202.515	0.00881	0.00317	0.00317	0.00899	0.00931	0.00355982
49378	202.519	0.00882	0.00442	0.00442	0.00899	0.00921	0.00433988
49377	202.523	0.00882	0.00511	0.00511	0.009	0.00858	0.00514426
49376	202.528	0.00882	0.00623	0.00623	0.009	0.00746	0.00594857
49375	202.532	0.00882	0.0074	0.0074	0.009	0.00764	0.00663093
49374	202.536	0.00882	0.00773	0.00773	0.009	0.00678	0.00706945
49373	202.54	0.00882	0.00769	0.00769	0.009	0.00623	0.00728856
49372	202.544	0.00883	0.00757	0.00757	0.00901	0.00721	0.00736139
49371	202.548	0.00883	0.00722	0.00722	0.00901	0.00819	0.00733671
49370	202.552	0.00883	0.00717	0.00717	0.00901	0.0104	0.00723892
49369	202.556	0.00883	0.00711	0.00711	0.00901	0.0109	0.00714114
49368	202.56	0.00883	0.00704	0.00704	0.00901	0.0098	0.00701899
49367	202.565	0.00884	0.00705	0.00705	0.00902	0.0103	0.00684811
49366	202.569	0.00884	0.00713	0.00713	0.00902	0.00983	0.00662851
49365	202.573	0.00884	0.0066	0.0066	0.00902	0.0105	0.00628708
49364	202.577	0.00884	0.00584	0.00584	0.00902	0.0104	0.00584821
49363	202.581	0.00884	0.00537	0.00537	0.00903	0.0087	0.00538501
49362	202.585	0.00884	0.0048	0.0048	0.00903	0.00841	0.00489748
49361	202.589	0.00885	0.00436	0.00436	0.00903	0.00911	0.00438563
49360	202.593	0.00885	0.00393	0.00393	0.00903	0.00802	0.00389818
49359	202.597	0.00885	0.00347	0.00347	0.00903	0.00779	0.00343513
49358	202.601	0.00885	0.00303	0.00303	0.00904	0.00696	0.00299648
49357	202.606	0.00885	0.00241	0.00241	0.00904	0.0067	0.00260659
49356	202.61	0.00885	0.00197	0.00197	0.00904	0.00537	0.00226058
49355	202.614	0.00886	0.00183	0.00183	0.00904	0.00341	0.00199254
49354	202.618	0.00886	0.0017	0.0017	0.00904	0.00259	0.00177567
49353	202.622	0.00886	0.00152	0.00152	0.00905	0.0028	0.00159293
49352	202.626	0.00886	0.00167	0.00167	0.00905	0.00336	0.00143942
49351	202.63	0.00886	0.00137	0.00137	0.00905	0.00404	0.00126401
49350	202.634	0.00886	0.001	0.001	0.00905	0.00447	0.00108374
49349	202.638	0.00887	0.000862	0.000862	0.00905	0.00584	0.000937581
49348	202.643	0.00887	0.000636	0.000636	0.00906	0.00504	0.000852312
49347	202.647	0.00887	0.000468	0.000468	0.00906	0.00429	0.000862017
49346	202.651	0.00887	0.000612	0.000612	0.00906	0.0029	0.00100808
49345	202.655	0.00888	0.00101	0.00101	0.00906	0.00198	0.00127831
49344	202.659	0.00888	0.00155	0.00155	0.00906	0.00298	0.00164591
49343	202.663	0.00888	0.00215	0.00215	0.00907	0.00372	0.00207192
49342	202.667	0.00889	0.00265	0.00265	0.00907	0.00473	0.00248328
49341	202.671	0.00889	0.00299	0.00299	0.00907	0.00621	0.00287269
49340	202.675	0.0089	0.00343	0.00343	0.00907	0.00598	0.00318905
49339	202.679	0.0089	0.00373	0.00373	0.00907	0.00629	0.00343234
49338	202.684	0.0089	0.00356	0.00356	0.00908	0.00733	0.00357826
49337	202.688	0.00891	0.0036	0.0036	0.00908	0.00711	0.00365113
49336	202.692	0.00891	0.00393	0.00393	0.00908	0.0085	0.00369967
49335	202.696	0.00891	0.00399	0.00399	0.00908	0.00829	0.00369952
49334	202.7	0.00892	0.00351	0.00351	0.00908	0.00641	0.00365069
49333	202.704	0.00892	0.00355	0.00355	0.00909	0.00743	0.00357753
49332	202.708	0.00892	0.00364	0.00364	0.00909	0.00838	0.00350438
49331	202.712	0.00893	0.00352	0.00352	0.00909	0.00853	0.0034799
49330	202.716	0.00893	0.00297	0.00297	0.00909	0.00771	0.0035041
49329	202.72	0.00893	0.00311	0.00311	0.0091	0.00727	0.00372295
49328	202.725	0.00894	0.00377	0.00377	0.0091	0.0061	0.00408778
49327	202.729	0.00894	0.00436	0.00436	0.0091	0.00508	0.00457424
49326	202.733	0.00894	0.005	0.005	0.0091	0.00489	0.00513364
49325	202.737	0.00895	0.00604	0.00604	0.00911	0.00614	0.00574166
49324	202.741	0.00895	0.00672	0.00672	0.00911	0.00769	0.00622799
49323	202.745	0.00896	0.00706	0.00706	0.00912	0.00894	0.00654399
49322	202.749	0.00896	0.00729	0.00729	0.00912	0.00942	0.00664103
49321	202.753	0.00896	0.00713	0.00713	0.00913	0.00995	0.00651913
49320	202.757	0.00897	0.00648	0.00648	0.00913	0.00959	0.00622698
49319	202.762	0.00897	0.00567	0.00567	0.00913	0.0101	0.0058862
49318	202.766	0.00897	0.00506	0.00506	0.00914	0.00902	0.00566706
49317	202.77	0.00898	0.00459	0.00459	0.00914	0.00908	0.00561819
49316	202.774	0.00898	0.00497	0.00497	0.00915	0.00597	0.00583684
49315	202.778	0.00898	0.00603	0.00603	0.00915	0.00636	0.00627435
49314	202.782	0.00899	0.00731	0.00731	0.00916	0.00677	0.0068091
49313	202.786	0.00899	0.00773	0.00773	0.00916	0.00972	0.00729517
49312	202.79	0.00899	0.00832	0.00832	0.00917	0.0116	0.00761098
49311	202.794	0.009	0.00832	0.00832	0.00917	0.0105	0.00768362
49310	202.799	0.009	0.00813	0.00813	0.00917	0.0103	0.00746448
49309	202.803	0.00901	0.0074	0.0074	0.00918	0.00939	0.00697791
49308	202.807	0.00901	0.00664	0.00664	0.00918	0.0108	0.00636982
49307	202.811	0.00902	0.00535	0.00535	0.00919	0.0114	0.00571316
49306	202.815	0.00902	0.00461	0.00461	0.00919	0.0109	0.00522672
49305	202.819	0.00903	0.00382	0.00382	0.0092	0.00989	0.00488618
49304	202.823	0.00903	0.0041	0.0041	0.0092	0.00902	0.00483736
49303	202.827	0.00903	0.00495	0.00495	0.00921	0.00907	0.00500732
49302	202.832	0.00904	0.00576	0.00576	0.00921	0.00892	0.00529879
49301	202.836	0.00904	0.00548	0.00548	0.00921	0.0107	0.00561455
49300	202.84	0.00905	0.00605	0.00605	0.00922	0.0104	0.00597888
49299	202.844	0.00905	0.0065	0.0065	0.00922	0.00908	0.00631889
49298	202.848	0.00906	0.00634	0.00634	0.00923	0.00831	0.00653735
49297	202.852	0.00906	0.00678	0.00678	0.00923	0.00867	0.0067072
49296	202.856	0.00907	0.00763	0.00763	0.00924	0.00889	0.00673123
49295	202.86	0.00907	0.00738	0.00738	0.00924	0.011	0.00653656
49294	202.864	0.00908	0.0065	0.0065	0.00925	0.0109	0.00619612
49293	202.869	0.00908	0.00567	0.00567	0.00925	0.0127	0.0058071
49292	202.873	0.00909	0.00468	0.00468	0.00925	0.0105	0.00549101
49291	202.877	0.00909	0.00421	0.00421	0.00926	0.0109	0.00529643
49290	202.881	0.00909	0.00478	0.00478	0.00926	0.0122	0.0053448
49289	202.885	0.0091	0.00578	0.00578	0.00927	0.0103	0.00546605
49288	202.889	0.0091	0.0064	0.0064	0.00927	0.00924	0.005563
49287	202.893	0.00911	0.00623	0.00623	0.00928	0.00866	0.0054899
49286	202.897	0.00911	0.00608	0.00608	0.00928	0.00853	0.00529535
49285	202.901	0.00912	0.00495	0.00495	0.00929	0.00866	0.00497937
49284	202.906	0.00912	0.00347	0.00347	0.00929	0.0081	0.00468771
49283	202.91	0.00913	0.00345	0.00345	0.00929	0.00789	0.00461465
49282	202.914	0.00913	0.00438	0.00438	0.0093	0.00882	0.00476019
49281	202.918	0.00914	0.00513	0.00513	0.0093	0.00832	0.00495428
49280	202.922	0.00914	0.00602	0.00602	0.00931	0.00714	0.00512407
49279	202.926	0.00915	0.00637	0.00637	0.00931	0.00813	0.00509958
49278	202.93	0.00915	0.00551	0.00551	0.00932	0.00889	0.0047837
49277	202.934	0.00915	0.00433	0.00433	0.00932	0.00972	0.00432215
49276	202.939	0.00916	0.00335	0.00335	0.00933	0.00971	0.00388492
49275	202.943	0.00916	0.00213	0.00213	0.00933	0.00915	0.00364197
49274	202.947	0.00917	0.00233	0.00233	0.00933	0.00816	0.00371465
49273	202.951	0.00917	0.0038	0.0038	0.00934	0.00915	0.00412722
49272	202.955	0.00918	0.005	0.005	0.00934	0.00927	0.00473398
49271	202.959	0.00918	0.00578	0.00578	0.00935	0.00969	0.00534068
49270	202.963	0.00919	0.00667	0.00667	0.00935	0.00956	0.00577741
49269	202.967	0.00919	0.007	0.007	0.00936	0.00977	0.00589855
49268	202.971	0.0092	0.00654	0.00654	0.00936	0.0105	0.00570412
49267	202.976	0.0092	0.00547	0.00547	0.00937	0.0115	0.00524273
49266	202.98	0.00921	0.00444	0.00444	0.00937	0.0114	0.00466001
49265	202.984	0.00921	0.00349	0.00349	0.00937	0.00902	0.00415015
49264	202.988	0.00922	0.00309	0.00309	0.00938	0.00795	0.00381022
49263	202.992	0.00922	0.00286	0.00286	0.00938	0.00548	0.0037858
49262	202.996	0.00922	0.00344	0.00344	0.00939	0.00577	0.00407685
49261	203	0.00923	0.00397	0.00397	0.00939	0.00592	0.00461053
49260	203.005	0.00923	0.00545	0.00545	0.0094	0.00607	0.00531403
49259	203.009	0.00924	0.00656	0.00656	0.0094	0.00704	0.006066
49258	203.013	0.00924	0.00717	0.00717	0.00941	0.00792	0.00669659
49257	203.017	0.00925	0.00745	0.00745	0.00941	0.00947	0.00713304
49256	203.021	0.00925	0.00808	0.00808	0.00941	0.0108	0.00737536
49255	203.025	0.00926	0.00814	0.00814	0.00942	0.0101	0.00742358
49254	203.029	0.00926	0.00743	0.00743	0.00942	0.00952	0.00730198
49253	203.033	0.00927	0.00642	0.00642	0.00943	0.00956	0.00718039
49252	203.037	0.00927	0.00661	0.00661	0.00943	0.0106	0.0071801
49251	203.042	0.00928	0.00699	0.00699	0.00944	0.0118	0.00730109
49250	203.046	0.00928	0.00725	0.00725	0.00944	0.0123	0.00751909
49249	203.05	0.00929	0.00779	0.00779	0.00945	0.0108	0.00776133
49248	203.054	0.00929	0.00885	0.00885	0.00945	0.0116	0.00788228
49247	203.058	0.00929	0.00896	0.00896	0.00946	0.0104	0.00773644
49246	203.062	0.0093	0.00827	0.00827	0.00946	0.00881	0.00732386
49245	203.066	0.0093	0.00664	0.00664	0.00946	0.00841	0.00671731
49244	203.07	0.00931	0.00549	0.00549	0.00947	0.00917	0.00606231
49243	203.075	0.00931	0.00472	0.00472	0.00947	0.00977	0.0055286
49242	203.079	0.00932	0.00434	0.00434	0.00948	0.00903	0.00526165
49241	203.083	0.00932	0.00441	0.00441	0.00948	0.00713	0.00528569
49240	203.087	0.00933	0.00533	0.00533	0.00949	0.00654	0.00560066
49239	203.091	0.00933	0.00605	0.00605	0.00949	0.00791	0.00603683
49238	203.095	0.00934	0.0071	0.0071	0.00949	0.00765	0.00649721
49237	203.099	0.00934	0.00747	0.00747	0.0095	0.0092	0.00683634
49236	203.103	0.00935	0.0075	0.0075	0.0095	0.00837	0.00702999
49235	203.107	0.00935	0.00707	0.00707	0.00951	0.00998	0.00705394
49234	203.112	0.00936	0.00704	0.00704	0.00951	0.0105	0.00698094
49233	203.116	0.00936	0.00683	0.00683	0.00952	0.0104	0.00681099
49232	203.12	0.00936	0.0066	0.0066	0.00952	0.0109	0.00666529
49231	203.124	0.00937	0.00638	0.00638	0.00952	0.0114	0.00656807
49230	203.128	0.00937	0.0065	0.0065	0.00953	0.0112	0.00659204
49229	203.132	0.00938	0.00615	0.00615	0.00953	0.01	0.00676141
49228	203.136	0.00938	0.00633	0.00633	0.00954	0.00948	0.00710041
49227	203.141	0.00939	0.00728	0.00728	0.00954	0.00962	0.007609
49226	203.145	0.00939	0.00831	0.00831	0.00954	0.0116	0.00814178
49225	203.149	0.0094	0.00924	0.00924	0.00955	0.0126	0.00860183
49224	203.153	0.0094	0.0102	0.0102	0.00955	0.0115	0.00886801
49223	203.157	0.00941	0.00949	0.00949	0.00956	0.0115	0.00889188
49222	203.161	0.00941	0.00875	0.00875	0.00956	0.0111	0.00872192
49221	203.165	0.00942	0.00808	0.00808	0.00957	0.0117	0.00843085
49220	203.169	0.00942	0.00784	0.00784	0.00957	0.0115	0.0081398
49219	203.174	0.00943	0.00767	0.00767	0.00957	0.0114	0.007873
49218	203.178	0.00943	0.00798	0.00798	0.00958	0.0115	0.00770311
49217	203.182	0.00944	0.00735	0.00735	0.00958	0.0111	0.00760591
49216	203.186	0.00944	0.00732	0.00732	0.00959	0.00979	0.00765404
49215	203.19	0.00944	0.00725	0.00725	0.00959	0.0102	0.00787172
49214	203.194	0.00945	0.00763	0.00763	0.00959	0.00983	0.00818625
49213	203.198	0.00945	0.00845	0.00845	0.0096	0.0105	0.00852498
49212	203.202	0.00946	0.0098	0.0098	0.0096	0.0101	0.00879103
49211	203.207	0.00946	0.0101	0.0101	0.00961	0.0109	0.00881489
49210	203.211	0.00947	0.00961	0.00961	0.00961	0.0121	0.00857238
49209	203.215	0.00947	0.00812	0.00812	0.00961	0.0127	0.00816038
49208	203.219	0.00948	0.00708	0.00708	0.00962	0.0122	0.00774841
49207	203.223	0.00948	0.0062	0.0062	0.00962	0.0103	0.00750597
49206	203.227	0.00949	0.00626	0.00626	0.00963	0.00976	0.00760251
49205	203.231	0.00949	0.00735	0.00735	0.00963	0.00921	0.00803799
49204	203.236	0.0095	0.00898	0.00898	0.00964	0.00902	0.00869133
49203	203.24	0.0095	0.01	0.01	0.00964	0.00938	0.0092962
49202	203.244	0.00951	0.0108	0.0108	0.00964	0.0104	0.00970736
49201	203.248	0.00951	0.011	0.011	0.00965	0.0108	0.00980379
49200	203.252	0.00952	0.0101	0.0101	0.00965	0.0109	0.00956133
49199	203.256	0.00952	0.00902	0.00902	0.00966	0.0112	0.00910105
49198	203.26	0.00952	0.00821	0.00821	0.00966	0.0115	0.00864081
49197	203.264	0.00953	0.00755	0.00755	0.00966	0.0102	0.00825321
49196	203.269	0.00953	0.00716	0.00716	0.00967	0.00948	0.00801085
49195	203.273	0.00954	0.00777	0.00777	0.00967	0.00934	0.00793792
49194	203.277	0.00954	0.00847	0.00847	0.00968	0.0106	0.0078892
49193	203.281	0.00955	0.00847	0.00847	0.00968	0.0121	0.00769529
49192	203.285	0.00955	0.00828	0.00828	0.00968	0.012	0.00730781
49191	203.289	0.00956	0.00722	0.00722	0.00969	0.0122	0.00672678
49190	203.293	0.00956	0.00596	0.00596	0.00969	0.0108	0.00604902
49189	203.298	0.00956	0.00439	0.00439	0.0097	0.0111	0.00549228
49188	203.302	0.00957	0.00372	0.00372	0.0097	0.00945	0.00522593
49187	203.306	0.00957	0.00419	0.00419	0.00971	0.00844	0.00529829
49186	203.31	0.00958	0.00546	0.00546	0.00971	0.00919	0.00566096
49185	203.314	0.00958	0.00659	0.00659	0.00971	0.00827	0.00616874
49184	203.318	0.00959	0.00745	0.00745	0.00972	0.00876	0.0066523
49183	203.322	0.00959	0.00787	0.00787	0.00972	0.00917	0.00706324
49182	203.326	0.0096	0.00721	0.00721	0.00973	0.00807	0.00735321
49181	203.331	0.0096	0.00708	0.00708	0.00973	0.00873	0.00761897
49180	203.335	0.00961	0.00735	0.00735	0.00973	0.0101	0.00788471
49179	203.339	0.00961	0.00811	0.00811	0.00974	0.00856	0.00815043
49178	203.343	0.00961	0.00885	0.00885	0.00974	0.00959	0.00836776
49177	203.347	0.00962	0.00948	0.00948	0.00975	0.00969	0.00843997
49176	203.351	0.00962	0.00926	0.00926	0.00975	0.00994	0.00829453
49175	203.355	0.00963	0.00816	0.00816	0.00976	0.0097	0.00788311
49174	203.359	0.00963	0.00706	0.00706	0.00976	0.00972	0.00730246
49173	203.364	0.00964	0.00648	0.00648	0.00976	0.00887	0.00662514
49172	203.368	0.00964	0.00617	0.00617	0.00977	0.00911	0.00589952
49171	203.372	0.00965	0.00522	0.00522	0.00977	0.00803	0.00514978
49170	203.376	0.00965	0.00439	0.00439	0.00978	0.00874	0.00437593
49169	203.38	0.00965	0.00372	0.00372	0.00978	0.0094	0.00365049
49168	203.384	0.00966	0.00287	0.00287	0.00978	0.00871	0.00294928
49167	203.388	0.00966	0.00173	0.00173	0.00979	0.00855	0.00233999
49166	203.393	0.00967	0.0013	0.0013	0.00979	0.00795	0.00188303
49165	203.397	0.00967	0.00134	0.00134	0.0098	0.00806	0.00160015
49164	203.401	0.00968	0.00144	0.00144	0.0098	0.00606	0.00151066
49163	203.405	0.00968	0.00117	0.00117	0.0098	0.00503	0.00163144
49162	203.409	0.00969	0.0013	0.0013	0.00981	0.00532	0.0019649
49161	203.413	0.00969	0.00167	0.00167	0.00981	0.00593	0.00246509
49160	203.417	0.0097	0.00312	0.00312	0.00982	0.00581	0.00311749
49159	203.422	0.0097	0.00441	0.00441	0.00982	0.00501	0.00381816
49158	203.426	0.0097	0.00487	0.00487	0.00983	0.00589	0.00449462
49157	203.43	0.00971	0.00503	0.00503	0.00983	0.00796	0.00514685
49156	203.434	0.00971	0.0058	0.0058	0.00983	0.00814	0.00582319
49155	203.438	0.00972	0.00608	0.00608	0.00984	0.00815	0.00647532
49154	203.442	0.00972	0.0067	0.0067	0.00984	0.00717	0.00717572
49153	203.446	0.00973	0.00804	0.00804	0.00985	0.00789	0.00782774
49152	203.451	0.00973	0.00933	0.00933	0.00985	0.00953	0.00838307
49151	203.455	0.00974	0.00982	0.00982	0.00986	0.0104	0.00869678
49150	203.459	0.00974	0.00935	0.00935	0.00986	0.0119	0.00879305
49149	203.463	0.00975	0.00866	0.00866	0.00987	0.0117	0.00869607
49148	203.467	0.00975	0.00802	0.00802	0.00987	0.0103	0.00852663
49147	203.471	0.00975	0.00797	0.00797	0.00988	0.0116	0.00833306
49146	203.475	0.00976	0.00826	0.00826	0.00988	0.0107	0.00821195
49145	203.48	0.00976	0.00837	0.00837	0.00989	0.0102	0.00806671
49144	203.484	0.00977	0.00789	0.00789	0.00989	0.00909	0.00784902
49143	203.488	0.00977	0.00819	0.00819	0.0099	0.00864	0.0075589
49142	203.492	0.00978	0.00784	0.00784	0.0099	0.00724	0.00709977
49141	203.496	0.00978	0.00651	0.00651	0.00991	0.00607	0.00644749
49140	203.5	0.00979	0.00534	0.00534	0.00991	0.00619	0.00577111
49139	203.504	0.00979	0.00519	0.00519	0.00992	0.00658	0.00514308
49138	203.508	0.0098	0.00436	0.00436	0.00992	0.00774	0.00463583
49137	203.513	0.0098	0.00327	0.00327	0.00993	0.00598	0.00437006
49136	203.517	0.0098	0.00322	0.00322	0.00993	0.00573	0.00446645
49135	203.521	0.00981	0.00419	0.00419	0.00994	0.00632	0.00492497
49134	203.525	0.00981	0.00536	0.00536	0.00994	0.00696	0.00562485
49133	203.529	0.00982	0.0063	0.0063	0.00995	0.00711	0.00637297
49132	203.533	0.00982	0.00804	0.00804	0.00995	0.00885	0.0070486
49131	203.537	0.00983	0.00916	0.00916	0.00996	0.00959	0.00743452
49130	203.542	0.00983	0.00868	0.00868	0.00996	0.0107	0.00741008
49129	203.546	0.00984	0.00708	0.00708	0.00997	0.0117	0.00707188
49128	203.55	0.00984	0.00621	0.00621	0.00997	0.0103	0.00656475
49127	203.554	0.00985	0.00571	0.00571	0.00998	0.0103	0.00603353
49126	203.558	0.00985	0.00508	0.00508	0.00998	0.00805	0.00559889
49125	203.562	0.00986	0.00459	0.00459	0.00999	0.00578	0.00535734
49124	203.566	0.00986	0.00502	0.00502	0.00999	0.00771	0.00540539
49123	203.571	0.00987	0.00554	0.00554	0.01	0.00776	0.0056706
49122	203.575	0.00987	0.00559	0.00559	0.01	0.00698	0.00612882
49121	203.579	0.00988	0.00608	0.00608	0.01	0.00728	0.00668352
49120	203.583	0.00989	0.00772	0.00772	0.01	0.00812	0.00733468
49119	203.587	0.00989	0.00867	0.00867	0.01	0.00977	0.00788929
49118	203.591	0.0099	0.00893	0.00893	0.01	0.0107	0.0082991
49117	203.595	0.0099	0.00875	0.00875	0.01	0.0117	0.00861238
49116	203.6	0.00991	0.00866	0.00866	0.01	0.0103	0.00887738
49115	203.604	0.00992	0.00873	0.00873	0.01	0.0118	0.00909412
49114	203.608	0.00992	0.00908	0.00908	0.01	0.0101	0.00931084
49113	203.612	0.00993	0.00961	0.00961	0.01	0.0105	0.00955167
49112	203.616	0.00993	0.0104	0.0104	0.0101	0.0124	0.00972012
49111	203.62	0.00994	0.0103	0.0103	0.0101	0.0127	0.00971972
49110	203.625	0.00995	0.01	0.01	0.0101	0.0126	0.0095505
49109	203.629	0.00995	0.00967	0.00967	0.0101	0.012	0.0092366
49108	203.633	0.00996	0.0088	0.0088	0.0101	0.0121	0.00875391
49107	203.637	0.00996	0.00796	0.00796	0.0101	0.011	0.00822304
49106	203.641	0.00997	0.00762	0.00762	0.0101	0.0103	0.00771632
49105	203.645	0.00998	0.00696	0.00696	0.0101	0.00945	0.00730609
49104	203.649	0.00998	0.00665	0.00665	0.0101	0.00875	0.00704057
49103	203.654	0.00999	0.00656	0.00656	0.0101	0.00732	0.00694384
49102	203.658	0.00999	0.00661	0.00661	0.0101	0.00767	0.00696767
49101	203.662	0.01	0.00714	0.00714	0.0101	0.0084	0.00711203
49100	203.666	0.01	0.0074	0.0074	0.0101	0.00949	0.0072805
49099	203.67	0.01	0.00755	0.00755	0.0101	0.011	0.00749716
49098	203.674	0.01	0.00773	0.00773	0.0101	0.0117	0.00771381
49097	203.678	0.01	0.00792	0.00792	0.0101	0.0147	0.00793043
49096	203.683	0.01	0.00792	0.00792	0.0101	0.0138	0.00805063
49095	203.687	0.01	0.00857	0.00857	0.0101	0.0131	0.0080744
49094	203.691	0.01	0.00869	0.00869	0.0101	0.0123	0.00790536
49093	203.695	0.01	0.00833	0.00833	0.0101	0.0125	0.00751943
49092	203.699	0.0101	0.00727	0.00727	0.0102	0.0127	0.00694073
49091	203.703	0.0101	0.00611	0.00611	0.0102	0.0126	0.00626568
49090	203.708	0.0101	0.00523	0.00523	0.0102	0.0107	0.00563888
49089	203.712	0.0101	0.0046	0.0046	0.0102	0.00989	0.00518081
49088	203.716	0.0101	0.00379	0.00379	0.0102	0.00739	0.00489145
49087	203.72	0.0101	0.00417	0.00417	0.0102	0.00735	0.00493944
49086	203.724	0.0101	0.00541	0.00541	0.0102	0.00676	0.00522837
49085	203.728	0.0101	0.00579	0.00579	0.0102	0.00614	0.00566183
49084	203.732	0.0101	0.00557	0.00557	0.0102	0.00772	0.00619162
49083	203.737	0.0101	0.0068	0.0068	0.0102	0.0103	0.00684182
49082	203.741	0.0101	0.00777	0.00777	0.0102	0.0118	0.00749197
49081	203.745	0.0101	0.00801	0.00801	0.0102	0.0117	0.0080698
49080	203.749	0.0101	0.0087	0.0087	0.0102	0.0128	0.00855123
49079	203.753	0.0101	0.00982	0.00982	0.0102	0.0119	0.00891219
49078	203.757	0.0101	0.00987	0.00987	0.0102	0.0114	0.00898408
49077	203.761	0.0101	0.00922	0.00922	0.0102	0.0102	0.00881512
49076	203.766	0.0101	0.00878	0.00878	0.0102	0.00902	0.00847758
49075	203.77	0.0101	0.00782	0.00782	0.0102	0.0109	0.00804374
49074	203.774	0.0101	0.00735	0.00735	0.0102	0.011	0.00758586
49073	203.778	0.0101	0.00674	0.00674	0.0103	0.0101	0.00724841
49072	203.782	0.0101	0.00668	0.00668	0.0103	0.00928	0.0070314
49071	203.786	0.0102	0.00663	0.00663	0.0103	0.0111	0.00698295
49070	203.791	0.0102	0.00695	0.00695	0.0103	0.00955	0.00703082
49069	203.795	0.0102	0.00715	0.00715	0.0103	0.0111	0.00712684
49068	203.799	0.0102	0.00765	0.00765	0.0103	0.0105	0.00722286
49067	203.803	0.0102	0.00748	0.00748	0.0103	0.0109	0.00729479
49066	203.807	0.0102	0.00726	0.00726	0.0103	0.011	0.00736672
49065	203.811	0.0102	0.00701	0.00701	0.0103	0.0107	0.00743863
49064	203.815	0.0102	0.0074	0.0074	0.0103	0.0107	0.00755869
49063	203.82	0.0102	0.00775	0.00775	0.0103	0.0112	0.00765467
49062	203.824	0.0102	0.00809	0.00809	0.0103	0.0119	0.00765436
49061	203.828	0.0102	0.00821	0.00821	0.0103	0.0121	0.00758184
49060	203.832	0.0102	0.00805	0.00805	0.0103	0.011	0.00736491
49059	203.836	0.0102	0.00679	0.00679	0.0103	0.0113	0.0070036
49058	203.84	0.0102	0.00614	0.00614	0.0103	0.0122	0.00664232
49057	203.845	0.0102	0.00645	0.00645	0.0103	0.0114	0.00635327
49056	203.849	0.0102	0.00572	0.00572	0.0103	0.0102	0.00611236
49055	203.853	0.0102	0.00539	0.00539	0.0103	0.0101	0.00601586
49054	203.857	0.0102	0.0059	0.0059	0.0103	0.0106	0.00606374
49053	203.861	0.0102	0.00633	0.00633	0.0103	0.0119	0.00615974
49052	203.865	0.0102	0.0064	0.0064	0.0103	0.0114	0.00618355
49051	203.869	0.0102	0.00682	0.00682	0.0103	0.0118	0.00611112
49050	203.874	0.0102	0.00639	0.00639	0.0104	0.0113	0.00587028
49049	203.878	0.0103	0.00581	0.00581	0.0104	0.00988	0.0055573
49048	203.882	0.0103	0.005	0.005	0.0104	0.00976	0.00529245
49047	203.886	0.0103	0.00376	0.00376	0.0104	0.0093	0.0051479
49046	203.89	0.0103	0.00409	0.00409	0.0104	0.00845	0.00526796
49045	203.894	0.0103	0.00559	0.00559	0.0104	0.00961	0.00558044
49044	203.899	0.0103	0.00655	0.00655	0.0104	0.0104	0.0058929
49043	203.903	0.0103	0.00687	0.00687	0.0104	0.0103	0.00606102
49042	203.907	0.0103	0.00746	0.00746	0.0104	0.00999	0.00601267
49041	203.911	0.0103	0.00642	0.00642	0.0104	0.0101	0.00560358
49040	203.915	0.0103	0.00493	0.00493	0.0104	0.0107	0.00495404
49039	203.919	0.0103	0.00359	0.00359	0.0104	0.0105	0.00435264
49038	203.923	0.0103	0.0029	0.0029	0.0104	0.00978	0.00396772
49037	203.928	0.0103	0.00242	0.00242	0.0104	0.00911	0.00389542
49036	203.932	0.0103	0.00328	0.00328	0.0104	0.00819	0.0041838
49035	203.936	0.0103	0.00477	0.00477	0.0104	0.00843	0.00476068
49034	203.94	0.0103	0.00626	0.00626	0.0104	0.00733	0.0053856
49033	203.944	0.0103	0.00678	0.00678	0.0104	0.00735	0.00589026
49032	203.948	0.0103	0.00667	0.00667	0.0104	0.00823	0.00617851
49031	203.953	0.0103	0.0068	0.0068	0.0104	0.0104	0.00629845
49030	203.957	0.0103	0.00629	0.00629	0.0104	0.0112	0.00627416
49029	203.961	0.0103	0.00527	0.00527	0.0104	0.00981	0.00622583
49028	203.965	0.0103	0.00565	0.00565	0.0104	0.00965	0.00632172
49027	203.969	0.0103	0.00683	0.00683	0.0104	0.0092	0.00658586
49026	203.973	0.0103	0.00685	0.00685	0.0105	0.00904	0.00684997
49025	203.978	0.0103	0.00698	0.00698	0.0105	0.00875	0.00716214
49024	203.982	0.0104	0.00805	0.00805	0.0105	0.00909	0.00749831
49023	203.986	0.0104	0.00819	0.00819	0.0105	0.00837	0.00773832
49022	203.99	0.0104	0.00751	0.00751	0.0105	0.00897	0.00783413
49021	203.994	0.0104	0.00798	0.00798	0.0105	0.00885	0.00795396
49020	203.998	0.0104	0.00853	0.00853	0.0105	0.00759	0.00809781
49019	204.002	0.0104	0.00774	0.00774	0.0105	0.00761	0.00816957
49018	204.007	0.0104	0.00767	0.00767	0.0105	0.00777	0.00831339
49017	204.011	0.0104	0.00885	0.00885	0.0105	0.00798	0.00852929
49016	204.015	0.0104	0.00918	0.00918	0.0105	0.00874	0.00867309
49015	204.019	0.0104	0.00893	0.00893	0.0105	0.00793	0.00874481
49014	204.023	0.0104	0.00881	0.00881	0.0105	0.00916	0.00874446
49013	204.028	0.0104	0.00892	0.00892	0.0105	0.00954	0.00864801
49012	204.032	0.0104	0.0088	0.0088	0.0105	0.00828	0.00833538
49011	204.036	0.0104	0.00833	0.00833	0.0105	0.00907	0.00785464
49010	204.04	0.0104	0.00756	0.00756	0.0105	0.00942	0.00725383
49009	204.044	0.0104	0.00691	0.00691	0.0105	0.00951	0.00658102
49008	204.048	0.0104	0.00557	0.00557	0.0105	0.00881	0.00598032
49007	204.053	0.0104	0.00444	0.00444	0.0105	0.00685	0.00554778
49006	204.057	0.0104	0.00408	0.00408	0.0105	0.00677	0.00540346
49005	204.061	0.0104	0.00478	0.00478	0.0105	0.00696	0.00545127
49004	204.065	0.0104	0.00628	0.00628	0.0105	0.00749	0.00559513
49003	204.069	0.0105	0.00717	0.00717	0.0105	0.00774	0.00564293
49002	204.073	0.0105	0.00655	0.00655	0.0106	0.00894	0.0054506
49001	204.077	0.0105	0.00532	0.00532	0.0106	0.0102	0.0050422
49000	204.082	0.0105	0.00398	0.00398	0.0106	0.0111	0.00458582
48999	204.086	0.0105	0.00311	0.00311	0.0106	0.00845	0.0042255
48998	204.09	0.0105	0.0029	0.0029	0.0106	0.00813	0.00415331
48997	204.094	0.0105	0.00362	0.00362	0.0106	0.0103	0.00444122
48996	204.098	0.0105	0.00491	0.00491	0.0106	0.011	0.00501717
48995	204.102	0.0105	0.00599	0.00599	0.0106	0.0119	0.00576111
48994	204.107	0.0105	0.00674	0.00674	0.0106	0.0119	0.00648098
48993	204.111	0.0105	0.00756	0.00756	0.0106	0.0119	0.00700877
48992	204.115	0.0105	0.00848	0.00848	0.0106	0.0112	0.0072245
48991	204.119	0.0105	0.00829	0.00829	0.0106	0.0106	0.0070802
48990	204.123	0.0105	0.00723	0.00723	0.0106	0.0113	0.00669592
48989	204.127	0.0105	0.00567	0.00567	0.0106	0.0122	0.00621567
48988	204.132	0.0105	0.00473	0.00473	0.0106	0.0107	0.00583145
48987	204.136	0.0105	0.0045	0.0045	0.0106	0.00902	0.00566324
48986	204.14	0.0105	0.00496	0.00496	0.0106	0.00888	0.00573499
48985	204.144	0.0105	0.00629	0.00629	0.0106	0.0105	0.00592672
48984	204.148	0.0105	0.00725	0.00725	0.0106	0.0107	0.00609443
48983	204.153	0.0106	0.00727	0.00727	0.0106	0.0102	0.00607019
48982	204.157	0.0106	0.00619	0.00619	0.0106	0.0112	0.00580603
48981	204.161	0.0106	0.00519	0.00519	0.0106	0.0118	0.00542194
48980	204.165	0.0106	0.00447	0.00447	0.0106	0.0103	0.00503788
48979	204.169	0.0106	0.00387	0.00387	0.0106	0.00988	0.00482178
48978	204.173	0.0106	0.00384	0.00384	0.0107	0.00959	0.00489354
48977	204.178	0.0106	0.00493	0.00493	0.0107	0.00943	0.00532511
48976	204.182	0.0106	0.00579	0.00579	0.0107	0.00984	0.00597251
48975	204.186	0.0106	0.00646	0.00646	0.0107	0.0101	0.00671581
48974	204.19	0.0106	0.008	0.008	0.0107	0.0109	0.00741107
48973	204.194	0.0106	0.00919	0.00919	0.0107	0.0113	0.00793839
48972	204.198	0.0106	0.00896	0.00896	0.0107	0.0115	0.00820187
48971	204.202	0.0106	0.00842	0.00842	0.0107	0.0152	0.00822552
48970	204.207	0.0106	0.00796	0.00796	0.0107	0.0129	0.00812926
48969	204.211	0.0106	0.00784	0.00784	0.0107	0.0112	0.00793709
48968	204.215	0.0106	0.00761	0.00761	0.0107	0.0106	0.00767301
48967	204.219	0.0106	0.00752	0.00752	0.0107	0.0109	0.00740895
48966	204.223	0.0106	0.00755	0.00755	0.0107	0.0107	0.00714491
48965	204.227	0.0106	0.00707	0.00707	0.0107	0.0112	0.00685691
48964	204.232	0.0106	0.00608	0.00608	0.0107	0.0107	0.00666484
48963	204.236	0.0106	0.00586	0.00586	0.0107	0.00952	0.00664059
48962	204.24	0.0107	0.00596	0.00596	0.0107	0.00966	0.00680813
48961	204.244	0.0107	0.00675	0.00675	0.0107	0.0106	0.00716742
48960	204.248	0.0107	0.00788	0.00788	0.0107	0.0111	0.00762256
48959	204.252	0.0107	0.00878	0.00878	0.0107	0.0105	0.00812561
48958	204.257	0.0107	0.00892	0.00892	0.0107	0.0109	0.00855671
48957	204.261	0.0107	0.00896	0.00896	0.0108	0.0112	0.00884397
48956	204.265	0.0107	0.00912	0.00912	0.0108	0.0128	0.00908327
48955	204.269	0.0107	0.00927	0.00927	0.0108	0.0131	0.00925066
48954	204.273	0.0107	0.00926	0.00926	0.0108	0.012	0.00941803
48953	204.278	0.0107	0.00938	0.00938	0.0108	0.0123	0.00960935
48952	204.282	0.0107	0.0099	0.0099	0.0108	0.0127	0.00984858
48951	204.286	0.0107	0.0102	0.0102	0.0108	0.0125	0.0101118
48950	204.29	0.0107	0.0104	0.0104	0.0108	0.0126	0.010327
48949	204.294	0.0107	0.0106	0.0106	0.0108	0.0131	0.0104464
48948	204.298	0.0107	0.011	0.011	0.0108	0.0125	0.0104459
48947	204.303	0.0107	0.0111	0.0111	0.0108	0.0118	0.0102059
48946	204.307	0.0107	0.0103	0.0103	0.0108	0.0127	0.00970243
48945	204.311	0.0107	0.00926	0.00926	0.0108	0.0124	0.00900732
48944	204.315	0.0107	0.00846	0.00846	0.0108	0.0128	0.0082404
48943	204.319	0.0107	0.00693	0.00693	0.0108	0.0108	0.00754541
48942	204.323	0.0107	0.00579	0.00579	0.0108	0.00926	0.00709
48941	204.328	0.0107	0.0057	0.0057	0.0108	0.00793	0.0069939
48940	204.332	0.0108	0.00644	0.00644	0.0108	0.0107	0.00723312
48939	204.336	0.0108	0.00754	0.00754	0.0108	0.0112	0.00768788
48938	204.34	0.0108	0.00911	0.00911	0.0108	0.0115	0.00811864
48937	204.344	0.0108	0.00973	0.00973	0.0108	0.0112	0.00835779
48936	204.349	0.0108	0.00936	0.00936	0.0108	0.0125	0.00823771
48935	204.353	0.0108	0.00863	0.00863	0.0109	0.0126	0.00785424
48934	204.357	0.0108	0.00686	0.00686	0.0109	0.0136	0.0072553
48933	204.361	0.0108	0.00563	0.00563	0.0109	0.0131	0.00670429
48932	204.365	0.0108	0.00535	0.00535	0.0109	0.0125	0.00634487
48931	204.369	0.0108	0.0058	0.0058	0.0109	0.0117	0.00620096
48930	204.374	0.0108	0.00613	0.00613	0.0109	0.0112	0.00617677
48929	204.378	0.0108	0.00693	0.00693	0.0109	0.0108	0.00627227
48928	204.382	0.0108	0.00678	0.00678	0.0109	0.0103	0.00636777
48927	204.386	0.0108	0.00643	0.00643	0.0109	0.0112	0.00643933
48926	204.39	0.0108	0.0058	0.0058	0.0109	0.0115	0.00658269
48925	204.394	0.0108	0.00614	0.00614	0.0109	0.0105	0.00689359
48924	204.399	0.0108	0.00683	0.00683	0.0109	0.00898	0.00732414
48923	204.403	0.0108	0.00797	0.00797	0.0109	0.00907	0.00787432
48922	204.407	0.0108	0.00883	0.00883	0.0109	0.0103	0.00842446
48921	204.411	0.0109	0.00967	0.00967	0.0109	0.00969	0.00892669
48920	204.415	0.0109	0.00957	0.00957	0.0109	0.0115	0.00923743
48919	204.42	0.0109	0.00962	0.00962	0.0109	0.0111	0.00933278
48918	204.424	0.0109	0.00975	0.00975	0.0109	0.0111	0.00921275
48917	204.428	0.0109	0.00954	0.00954	0.0109	0.0108	0.00887738
48916	204.432	0.0109	0.00876	0.00876	0.0109	0.01	0.00844632
48915	204.436	0.0109	0.00747	0.00747	0.0109	0.0103	0.00796745
48914	204.44	0.0109	0.00686	0.00686	0.011	0.0104	0.00758432
48913	204.445	0.0109	0.00683	0.00683	0.011	0.00915	0.00732084
48912	204.449	0.0109	0.00698	0.00698	0.011	0.00784	0.007177
48911	204.453	0.0109	0.00732	0.00732	0.011	0.00674	0.00712887
48910	204.457	0.0109	0.00737	0.00737	0.011	0.00886	0.0071525
48909	204.461	0.0109	0.00723	0.00723	0.011	0.0109	0.00724788
48908	204.465	0.0109	0.007	0.007	0.011	0.0097	0.00741502
48907	204.47	0.0109	0.00687	0.00687	0.011	0.0103	0.00765391
48906	204.474	0.0109	0.00762	0.00762	0.011	0.00988	0.00801236
48905	204.478	0.0109	0.00893	0.00893	0.011	0.00951	0.00839469
48904	204.482	0.0109	0.00952	0.00952	0.011	0.0101	0.00870525
48903	204.486	0.0109	0.00928	0.00928	0.011	0.0117	0.00892012
48902	204.491	0.0109	0.00907	0.00907	0.011	0.0113	0.00906324
48901	204.495	0.011	0.00878	0.00878	0.011	0.0108	0.00915852
48900	204.499	0.011	0.00892	0.00892	0.011	0.011	0.00925379
48899	204.503	0.011	0.00916	0.00916	0.011	0.0108	0.00932515
48898	204.507	0.011	0.00977	0.00977	0.011	0.0101	0.00937258
48897	204.512	0.011	0.0102	0.0102	0.011	0.0114	0.00930048
48896	204.516	0.011	0.00992	0.00992	0.011	0.0112	0.00898929
48895	204.52	0.011	0.00864	0.00864	0.011	0.0111	0.00851079
48894	204.524	0.011	0.00775	0.00775	0.011	0.0117	0.00803233
48893	204.528	0.011	0.00686	0.00686	0.011	0.00998	0.00764952
48892	204.532	0.011	0.00618	0.00618	0.0111	0.00905	0.00738627
48891	204.537	0.011	0.00681	0.00681	0.0111	0.00874	0.00740987
48890	204.541	0.011	0.00816	0.00816	0.0111	0.00909	0.00757688
48889	204.545	0.011	0.00833	0.00833	0.0111	0.011	0.00776778
48888	204.549	0.011	0.00783	0.00783	0.0111	0.012	0.00793476
48887	204.553	0.011	0.00828	0.00828	0.0111	0.0106	0.00810173
48886	204.558	0.011	0.00808	0.00808	0.0111	0.00981	0.00826868
48885	204.562	0.011	0.00791	0.00791	0.0111	0.00975	0.00841172
48884	204.566	0.011	0.0083	0.0083	0.0111	0.00934	0.00862644
48883	204.57	0.011	0.00945	0.00945	0.0111	0.0098	0.00879336
48882	204.574	0.011	0.00947	0.00947	0.0111	0.0104	0.0087691
48881	204.578	0.011	0.00951	0.00951	0.0111	0.0106	0.00862538
48880	204.583	0.011	0.00865	0.00865	0.0111	0.0119	0.00829054
48879	204.587	0.011	0.00753	0.00753	0.0111	0.0111	0.00790795
48878	204.591	0.011	0.0066	0.0066	0.0111	0.0114	0.00764483
48877	204.595	0.011	0.00691	0.00691	0.0111	0.0117	0.00762063
48876	204.599	0.011	0.00698	0.00698	0.0111	0.0117	0.0078592
48875	204.604	0.0111	0.00789	0.00789	0.0111	0.0113	0.00833662
48874	204.608	0.0111	0.00928	0.00928	0.0111	0.0105	0.00900509
48873	204.612	0.0111	0.0104	0.0104	0.0111	0.01	0.00967351
48872	204.616	0.0111	0.0105	0.0105	0.0111	0.0128	0.0102225
48871	204.62	0.0111	0.0108	0.0108	0.0111	0.0133	0.010628
48870	204.625	0.0111	0.0113	0.0113	0.0111	0.0129	0.0108664
48869	204.629	0.0111	0.0114	0.0114	0.0111	0.0132	0.0109138
48868	204.633	0.0111	0.0111	0.0111	0.0111	0.0135	0.0108178
48867	204.637	0.0111	0.0107	0.0107	0.0111	0.0139	0.0106263
48866	204.641	0.0111	0.0103	0.0103	0.0111	0.0135	0.010411
48865	204.645	0.0111	0.00993	0.00993	0.0111	0.0127	0.0102195
48864	204.65	0.0111	0.00965	0.00965	0.0111	0.0121	0.0101475
48863	204.654	0.0111	0.0098	0.0098	0.0111	0.0132	0.0101471
48862	204.658	0.0111	0.0103	0.0103	0.0111	0.0122	0.0102421
48861	204.662	0.0111	0.0107	0.0107	0.0111	0.0116	0.0103611
48860	204.666	0.0111	0.0108	0.0108	0.0111	0.0102	0.0104084
48859	204.671	0.0111	0.0105	0.0105	0.0111	0.0111	0.0103602
48858	204.675	0.0111	0.0104	0.0104	0.0112	0.0113	0.0102643
48857	204.679	0.0111	0.0103	0.0103	0.0112	0.0124	0.0100491
48856	204.683	0.0111	0.00977	0.00977	0.0112	0.0126	0.00980999
48855	204.687	0.0111	0.00938	0.00938	0.0112	0.0116	0.00952318
48854	204.691	0.0111	0.00935	0.00935	0.0112	0.0119	0.00921252
48853	204.696	0.0111	0.009	0.009	0.0112	0.0114	0.00887803
48852	204.7	0.0111	0.00868	0.00868	0.0112	0.0125	0.00856742
48851	204.704	0.0111	0.00824	0.00824	0.0112	0.0132	0.00825685
48850	204.708	0.0111	0.00756	0.00756	0.0112	0.0124	0.00801788
48849	204.713	0.0111	0.00744	0.00744	0.0112	0.0123	0.0079221
48848	204.717	0.0111	0.00763	0.00763	0.0112	0.011	0.00799336
48847	204.721	0.0111	0.00773	0.00773	0.0112	0.0118	0.00823163
48846	204.725	0.0111	0.00845	0.00845	0.0112	0.0121	0.00856532
48845	204.729	0.0111	0.00927	0.00927	0.0112	0.0109	0.00894669
48844	204.733	0.0111	0.00966	0.00966	0.0112	0.011	0.00930418
48843	204.738	0.0111	0.01	0.01	0.0112	0.0108	0.00954236
48842	204.742	0.0111	0.00986	0.00986	0.0112	0.0126	0.00966124
48841	204.746	0.0111	0.00961	0.00961	0.0112	0.0137	0.00966085
48840	204.75	0.0111	0.00977	0.00977	0.0112	0.0138	0.00958889
48839	204.754	0.0112	0.00967	0.00967	0.0112	0.0135	0.00942154
48838	204.759	0.0112	0.00914	0.00914	0.0112	0.013	0.00923034
48837	204.763	0.0112	0.00909	0.00909	0.0112	0.0118	0.00901531
48836	204.767	0.0112	0.00884	0.00884	0.0112	0.0114	0.0088003
48835	204.771	0.0112	0.00839	0.00839	0.0112	0.0112	0.00860916
48834	204.775	0.0112	0.00824	0.00824	0.0112	0.00988	0.00841803
48833	204.78	0.0112	0.00835	0.00835	0.0112	0.0101	0.00817922
48832	204.784	0.0112	0.00836	0.00836	0.0112	0.00924	0.0078689
48831	204.788	0.0112	0.00822	0.00822	0.0112	0.0102	0.00746323
48830	204.792	0.0112	0.00716	0.00716	0.0112	0.00962	0.00698606
48829	204.796	0.0112	0.00582	0.00582	0.0112	0.00911	0.00658045
48828	204.8	0.0112	0.00532	0.00532	0.0112	0.00886	0.00638945
48827	204.805	0.0112	0.00558	0.00558	0.0112	0.00626	0.00653223
48826	204.809	0.0112	0.00576	0.00576	0.0112	0.00608	0.00698491
48825	204.813	0.0112	0.00734	0.00734	0.0112	0.00636	0.00767594
48824	204.817	0.0112	0.00938	0.00938	0.0112	0.00737	0.00843842
48823	204.821	0.0112	0.0105	0.0105	0.0113	0.0086	0.00901015
48822	204.826	0.0112	0.0101	0.0101	0.0113	0.00921	0.00931964
48821	204.83	0.0112	0.00956	0.00956	0.0113	0.00972	0.00934309
48820	204.834	0.0112	0.00913	0.00913	0.0113	0.0115	0.00917587
48819	204.838	0.0112	0.0088	0.0088	0.0113	0.012	0.00888951
48818	204.843	0.0112	0.00827	0.00827	0.0113	0.0103	0.00857933
48817	204.847	0.0112	0.0081	0.0081	0.0113	0.01	0.00831685
48816	204.851	0.0112	0.0084	0.0084	0.0113	0.0105	0.00810204
48815	204.855	0.0112	0.00816	0.00816	0.0113	0.0103	0.00788725
48814	204.859	0.0112	0.00757	0.00757	0.0113	0.0105	0.00774396
48813	204.863	0.0112	0.0069	0.0069	0.0113	0.0115	0.00762451
48812	204.868	0.0112	0.00734	0.00734	0.0113	0.012	0.00764803
48811	204.872	0.0112	0.00791	0.00791	0.0113	0.0109	0.00774301
48810	204.876	0.0112	0.00792	0.00792	0.0113	0.0106	0.00793328
48809	204.88	0.0112	0.00786	0.00786	0.0113	0.0105	0.00819501
48808	204.884	0.0112	0.00845	0.00845	0.0113	0.0103	0.00852818
48807	204.889	0.0112	0.00882	0.00882	0.0113	0.012	0.00886132
48806	204.893	0.0112	0.00915	0.00915	0.0113	0.0126	0.00912297
48805	204.897	0.0112	0.00989	0.00989	0.0113	0.0107	0.00919405
48804	204.901	0.0112	0.0104	0.0104	0.0113	0.0117	0.00897932
48803	204.905	0.0112	0.00952	0.00952	0.0113	0.0116	0.00843116
48802	204.91	0.0112	0.008	0.008	0.0113	0.0118	0.00759726
48801	204.914	0.0112	0.00618	0.00618	0.0113	0.0127	0.00666817
48800	204.918	0.0112	0.00497	0.00497	0.0113	0.0121	0.00585822
48799	204.922	0.0112	0.00407	0.00407	0.0113	0.00969	0.00528647
48798	204.926	0.0112	0.00398	0.00398	0.0113	0.0102	0.00507195
48797	204.931	0.0112	0.00465	0.00465	0.0113	0.0113	0.00526223
48796	204.935	0.0112	0.0057	0.0057	0.0113	0.0116	0.00566678
48795	204.939	0.0112	0.00642	0.00642	0.0113	0.0108	0.00616654
48794	204.943	0.0113	0.00702	0.00702	0.0113	0.0129	0.00661864
48793	204.947	0.0113	0.00782	0.00782	0.0113	0.0103	0.00688025
48792	204.952	0.0113	0.00728	0.00728	0.0113	0.0125	0.00690377
48791	204.956	0.0113	0.00721	0.00721	0.0113	0.0114	0.00673685
48790	204.96	0.0113	0.00664	0.00664	0.0113	0.0115	0.00647473
48789	204.964	0.0113	0.00563	0.00563	0.0113	0.0104	0.00621263
48788	204.968	0.0113	0.00515	0.00515	0.0113	0.0104	0.00606956
48787	204.973	0.0113	0.00581	0.00581	0.0113	0.0111	0.00614072
48786	204.977	0.0113	0.00592	0.00592	0.0113	0.00979	0.00630707
48785	204.981	0.0113	0.00675	0.00675	0.0113	0.0104	0.0065448
48784	204.985	0.0113	0.00764	0.00764	0.0113	0.0103	0.00671112
48783	204.989	0.0113	0.00732	0.00732	0.0113	0.0102	0.00666325
48782	204.994	0.0113	0.00711	0.00711	0.0113	0.0109	0.00644881
48781	204.998	0.0113	0.00621	0.00621	0.0113	0.0101	0.00611541
48780	205.002	0.0113	0.00489	0.00489	0.0113	0.011	0.00582963
48779	205.006	0.0113	0.00456	0.00456	0.0113	0.0101	0.00571042
48778	205.011	0.0113	0.00537	0.00537	0.0113	0.00892	0.00592432
48777	205.015	0.0113	0.00584	0.00584	0.0113	0.0098	0.00635232
48776	205.019	0.0113	0.00675	0.00675	0.0113	0.00937	0.00697062
48775	205.023	0.0113	0.00806	0.00806	0.0113	0.0109	0.00766022
48774	205.027	0.0113	0.00901	0.00901	0.0113	0.0115	0.00825462
48773	205.031	0.0113	0.00933	0.00933	0.0113	0.0111	0.00863489
48772	205.036	0.0113	0.00923	0.00923	0.0113	0.0114	0.00880104
48771	205.04	0.0113	0.00901	0.00901	0.0113	0.0114	0.00882446
48770	205.044	0.0113	0.0088	0.0088	0.0113	0.0103	0.00872896
48769	205.048	0.0113	0.00827	0.00827	0.0113	0.0112	0.00860969
48768	205.053	0.0113	0.00806	0.00806	0.0113	0.0112	0.00853799
48767	205.057	0.0113	0.00852	0.00852	0.0113	0.0127	0.00853764
48766	205.061	0.0113	0.0089	0.0089	0.0113	0.0122	0.00856107
48765	205.065	0.0113	0.00862	0.00862	0.0113	0.0121	0.00856071
48764	205.069	0.0113	0.00856	0.00856	0.0113	0.0132	0.00853658
48763	205.073	0.0113	0.0086	0.0086	0.0113	0.0113	0.0084649
48762	205.078	0.0113	0.00844	0.00844	0.0113	0.0107	0.00827434
48761	205.082	0.0113	0.00841	0.00841	0.0113	0.0118	0.00798869
48760	205.086	0.0113	0.00814	0.00814	0.0113	0.0111	0.00763174
48759	205.09	0.0113	0.00724	0.00724	0.0113	0.0108	0.00717972
48758	205.095	0.0113	0.00626	0.00626	0.0113	0.0127	0.00679906
48757	205.099	0.0113	0.00585	0.00585	0.0113	0.0133	0.00658483
48756	205.103	0.0113	0.0058	0.0058	0.0113	0.0109	0.00658456
48755	205.107	0.0113	0.0061	0.0061	0.0113	0.0114	0.00679822
48754	205.111	0.0113	0.00709	0.00709	0.0113	0.012	0.00720202
48753	205.116	0.0113	0.00826	0.00826	0.0113	0.0117	0.00762955
48752	205.12	0.0113	0.00866	0.00866	0.0113	0.012	0.00798574
48751	205.124	0.0113	0.0086	0.0086	0.0113	0.0113	0.00810424
48750	205.128	0.0113	0.00859	0.00859	0.0113	0.0105	0.00803262
48749	205.132	0.0113	0.0081	0.0081	0.0113	0.0126	0.00777088
48748	205.137	0.0113	0.00753	0.00753	0.0113	0.0118	0.00746164
48747	205.141	0.0113	0.00637	0.00637	0.0113	0.0113	0.0071049
48746	205.145	0.0113	0.00633	0.00633	0.0113	0.0118	0.006867
48745	205.149	0.0113	0.00658	0.00658	0.0113	0.0112	0.00670039
48744	205.154	0.0113	0.00709	0.00709	0.0113	0.0103	0.00662884
48743	205.158	0.0113	0.0066	0.0066	0.0113	0.0095	0.00653354
48742	205.162	0.0113	0.00646	0.00646	0.0113	0.00857	0.00648575
48741	205.166	0.0113	0.0063	0.0063	0.0113	0.0104	0.006533
48740	205.17	0.0113	0.00618	0.00618	0.0113	0.0115	0.00667526
48739	205.174	0.0113	0.00615	0.00615	0.0113	0.0105	0.0069838
48738	205.179	0.0113	0.00701	0.00701	0.0113	0.00964	0.00748233
48737	205.183	0.0113	0.00833	0.00833	0.0113	0.0114	0.00809959
48736	205.187	0.0113	0.00914	0.00914	0.0113	0.0112	0.00864554
48735	205.191	0.0113	0.00973	0.00973	0.0113	0.0121	0.0090727
48734	205.196	0.0113	0.01	0.01	0.0113	0.0123	0.00930982
48733	205.2	0.0113	0.00982	0.00982	0.0113	0.0119	0.00930944
48732	205.204	0.0113	0.00943	0.00943	0.0113	0.0119	0.00919032
48731	205.208	0.0113	0.00839	0.00839	0.0113	0.0109	0.00904746
48730	205.212	0.0113	0.00828	0.00828	0.0113	0.0108	0.00902334
48729	205.217	0.0113	0.00864	0.00864	0.0113	0.0116	0.00911795
48728	205.221	0.0113	0.00928	0.00928	0.0113	0.0117	0.00933127
48727	205.225	0.0113	0.00996	0.00996	0.0113	0.0121	0.00954457
48726	205.229	0.0113	0.0106	0.0106	0.0113	0.0114	0.00968663
48725	205.233	0.0113	0.0101	0.0101	0.0113	0.0122	0.00956753
48724	205.238	0.0113	0.00965	0.00965	0.0113	0.0124	0.00928226
48723	205.242	0.0113	0.00916	0.00916	0.0113	0.0123	0.00883084
48722	205.246	0.0113	0.00833	0.00833	0.0113	0.0124	0.00828451
48721	205.25	0.0113	0.00707	0.00707	0.0113	0.0117	0.00771448
48720	205.255	0.0113	0.00691	0.00691	0.0113	0.0126	0.00726318
48719	205.259	0.0113	0.00693	0.00693	0.0113	0.0118	0.00695433
48718	205.263	0.0113	0.00653	0.00653	0.0113	0.0125	0.00676417
48717	205.267	0.0113	0.0058	0.0058	0.0113	0.011	0.00674017
48716	205.271	0.0113	0.00686	0.00686	0.0113	0.0123	0.00695348
48715	205.276	0.0113	0.00728	0.00728	0.0113	0.00998	0.00723796
48714	205.28	0.0113	0.00741	0.00741	0.0113	0.00841	0.00756989
48713	205.284	0.0113	0.00781	0.00781	0.0113	0.0091	0.00787805
48712	205.288	0.0113	0.00888	0.00888	0.0113	0.0108	0.00811501
48711	205.292	0.0113	0.00898	0.00898	0.0113	0.0121	0.00823331
48710	205.297	0.0113	0.00853	0.00853	0.0113	0.0114	0.00820925
48709	205.301	0.0113	0.00736	0.00736	0.0113	0.0117	0.00806656
48708	205.305	0.0113	0.00776	0.00776	0.0113	0.0124	0.00792389
48707	205.309	0.0113	0.00828	0.00828	0.0113	0.0125	0.0077575
48706	205.314	0.0113	0.00771	0.00771	0.0113	0.011	0.00751996
48705	205.318	0.0113	0.007	0.007	0.0113	0.0105	0.00728243
48704	205.322	0.0113	0.00717	0.00717	0.0113	0.0111	0.00706865
48703	205.326	0.0113	0.00707	0.00707	0.0113	0.0118	0.00683117
48702	205.33	0.0113	0.00637	0.00637	0.0113	0.0112	0.0065937
48701	205.335	0.0113	0.00612	0.00612	0.0113	0.012	0.00642741
48700	205.339	0.0113	0.00609	0.00609	0.0113	0.0114	0.00640343
48699	205.343	0.0113	0.00624	0.00624	0.0113	0.0116	0.00652175
48698	205.347	0.0113	0.00615	0.00615	0.0113	0.0129	0.00675862
48697	205.351	0.0113	0.00679	0.00679	0.0113	0.0133	0.00713776
48696	205.356	0.0113	0.00786	0.00786	0.0113	0.0133	0.00756429
48695	205.36	0.0113	0.00854	0.00854	0.0113	0.0116	0.00791965
48694	205.364	0.0113	0.00875	0.00875	0.0113	0.0134	0.00813273
48693	205.368	0.0113	0.00863	0.00863	0.0113	0.014	0.00820352
48692	205.373	0.0113	0.00818	0.00818	0.0113	0.0127	0.00808464
48691	205.377	0.0113	0.00762	0.00762	0.0113	0.0115	0.00791835
48690	205.381	0.0113	0.00788	0.00788	0.0113	0.00995	0.00775208
48689	205.385	0.0113	0.00733	0.00733	0.0113	0.0113	0.00765694
48688	205.389	0.0113	0.00703	0.00703	0.0113	0.0116	0.00768033
48687	205.394	0.0113	0.00753	0.00753	0.0113	0.0107	0.00786965
48686	205.398	0.0113	0.00827	0.00827	0.0113	0.00955	0.00813005
48685	205.402	0.0113	0.00841	0.00841	0.0113	0.00986	0.00839044
48684	205.406	0.0113	0.00908	0.00908	0.0113	0.0111	0.0086745
48683	205.411	0.0113	0.00911	0.00911	0.0113	0.0123	0.00886375
48682	205.415	0.0113	0.00913	0.00913	0.0113	0.0123	0.00895818
48681	205.419	0.0113	0.00916	0.00916	0.0113	0.0123	0.00898151
48680	205.423	0.0113	0.00904	0.00904	0.0113	0.0126	0.00888635
48679	205.427	0.0113	0.00851	0.00851	0.0113	0.0132	0.00876751
48678	205.432	0.0113	0.00903	0.00903	0.0113	0.0135	0.00864867
48677	205.436	0.0113	0.00847	0.00847	0.0113	0.0114	0.00848246
48676	205.44	0.0113	0.00793	0.00793	0.0113	0.01	0.00829257
48675	205.444	0.0113	0.00824	0.00824	0.0113	0.0108	0.00817376
48674	205.448	0.0113	0.00828	0.00828	0.0113	0.0109	0.00805497
48673	205.453	0.0113	0.00774	0.00774	0.0113	0.0129	0.00795988
48672	205.457	0.0113	0.00771	0.00771	0.0113	0.0111	0.00793587
48671	205.461	0.0113	0.00797	0.00797	0.0113	0.0113	0.0080066
48670	205.465	0.0113	0.00764	0.00764	0.0113	0.0108	0.00807734
48669	205.47	0.0113	0.00832	0.00832	0.0113	0.0119	0.00821912
48668	205.474	0.0113	0.00868	0.00868	0.0113	0.0119	0.00833721
48667	205.478	0.0113	0.00874	0.00874	0.0113	0.0122	0.00840792
48666	205.482	0.0113	0.00853	0.00853	0.0113	0.0121	0.00843126
48665	205.487	0.0113	0.00836	0.00836	0.0113	0.0127	0.00840723
48664	205.491	0.0113	0.00823	0.00823	0.0113	0.0134	0.00833584
48663	205.495	0.0113	0.00825	0.00825	0.0113	0.0116	0.00819342
48662	205.499	0.0113	0.00847	0.00847	0.0113	0.0121	0.00800364
48661	205.503	0.0113	0.00796	0.00796	0.0113	0.0119	0.00776653
48660	205.508	0.0113	0.00767	0.00767	0.0113	0.0105	0.00752944
48659	205.512	0.0113	0.00686	0.00686	0.0113	0.013	0.00726868
48658	205.516	0.0113	0.00666	0.00666	0.0113	0.0125	0.00710266
48657	205.52	0.0113	0.00672	0.00672	0.0113	0.00918	0.00698399
48656	205.524	0.0113	0.00708	0.00708	0.0113	0.00964	0.00693636
48655	205.529	0.0113	0.00703	0.00703	0.0113	0.0104	0.00695974
48654	205.533	0.0113	0.00722	0.00722	0.0113	0.0126	0.00703047
48653	205.537	0.0113	0.00675	0.00675	0.0113	0.0137	0.00717221
48652	205.541	0.0113	0.00679	0.00679	0.0113	0.0111	0.00740861
48651	205.546	0.0113	0.00741	0.00741	0.0113	0.0108	0.00773967
48650	205.55	0.0113	0.00825	0.00825	0.0113	0.00935	0.00816537
48649	205.554	0.0113	0.00879	0.00879	0.0113	0.00973	0.00856737
48648	205.558	0.0113	0.00948	0.00948	0.0113	0.00972	0.00896934
48647	205.562	0.0113	0.00955	0.00955	0.0113	0.0115	0.00925294
48646	205.567	0.0113	0.00947	0.00947	0.0113	0.0116	0.00934722
48645	205.571	0.0113	0.0095	0.0095	0.0113	0.011	0.00922852
48644	205.575	0.0113	0.00978	0.00978	0.0113	0.0116	0.0089442
48643	205.579	0.0113	0.00939	0.00939	0.0113	0.0113	0.00844695
48642	205.584	0.0113	0.00779	0.00779	0.0113	0.0127	0.00778413
48641	205.588	0.0113	0.00649	0.00649	0.0113	0.0136	0.0070977
48640	205.592	0.0113	0.00589	0.00589	0.0113	0.0112	0.00645864
48639	205.596	0.0113	0.0056	0.0056	0.0113	0.00861	0.00591426
48638	205.601	0.0113	0.00543	0.00543	0.0113	0.00791	0.00536993
48637	205.605	0.0113	0.0054	0.0054	0.0113	0.00888	0.00484929
48636	205.609	0.0113	0.00496	0.00496	0.0113	0.00962	0.00430505
48635	205.613	0.0113	0.00383	0.00383	0.0113	0.008	0.00371354
48634	205.618	0.0113	0.0024	0.0024	0.0113	0.00656	0.00319304
48633	205.622	0.0113	0.00158	0.00158	0.0113	0.00641	0.00293275
48632	205.626	0.0113	0.00199	0.00199	0.0113	0.00573	0.00297993
48631	205.63	0.0113	0.00275	0.00275	0.0113	0.00504	0.00338184
48630	205.634	0.0113	0.00381	0.00381	0.0113	0.0066	0.00404386
48629	205.639	0.0113	0.00507	0.00507	0.0113	0.00692	0.00489499
48628	205.643	0.0113	0.00608	0.00608	0.0113	0.00859	0.00576971
48627	205.647	0.0113	0.00689	0.00689	0.0113	0.00787	0.00657341
48626	205.651	0.0113	0.00742	0.00742	0.0113	0.00752	0.00723518
48625	205.655	0.0113	0.00809	0.00809	0.0113	0.00809	0.00780233
48624	205.66	0.0113	0.00862	0.00862	0.0113	0.00787	0.00825121
48623	205.664	0.0113	0.00869	0.00869	0.0113	0.00949	0.00858185
48622	205.668	0.0113	0.00877	0.00877	0.0113	0.0103	0.00891247
48621	205.672	0.0113	0.00916	0.00916	0.0113	0.0123	0.00921942
48620	205.677	0.0113	0.00941	0.00941	0.0113	0.0125	0.0095027
48619	205.681	0.0113	0.00967	0.00967	0.0113	0.0123	0.00971505
48618	205.685	0.0113	0.0104	0.0104	0.0113	0.0132	0.0098801
48617	205.689	0.0113	0.0107	0.0107	0.0113	0.0131	0.00990333
48616	205.694	0.0113	0.0101	0.0101	0.0113	0.0138	0.00978475
48615	205.698	0.0113	0.00949	0.00949	0.0113	0.013	0.00957165
48614	205.702	0.0113	0.00908	0.00908	0.0113	0.0126	0.00935856
48613	205.706	0.0113	0.00879	0.00879	0.0113	0.0127	0.00916912
48612	205.71	0.0113	0.00876	0.00876	0.0113	0.0126	0.00907422
48611	205.715	0.0113	0.00898	0.00898	0.0113	0.0123	0.00909748
48610	205.719	0.0113	0.00908	0.00908	0.0113	0.0119	0.00921525
48609	205.723	0.0113	0.00945	0.00945	0.0113	0.0125	0.00940389
48608	205.727	0.0113	0.00964	0.00964	0.0113	0.0138	0.00961614
48607	205.732	0.0113	0.00967	0.00967	0.0113	0.0118	0.00982838
48606	205.736	0.0113	0.0101	0.0101	0.0113	0.0114	0.0100406
48605	205.74	0.0113	0.0106	0.0106	0.0113	0.0131	0.0101583
48604	205.744	0.0113	0.0105	0.0105	0.0113	0.0138	0.0101579
48603	205.749	0.0113	0.0103	0.0103	0.0113	0.0136	0.00999212
48602	205.753	0.0113	0.0103	0.0103	0.0113	0.0132	0.00970826
48601	205.757	0.0113	0.00957	0.00957	0.0113	0.0129	0.00928269
48600	205.761	0.0113	0.00864	0.00864	0.0113	0.0118	0.00876269
48599	205.766	0.0113	0.00784	0.00784	0.0113	0.0121	0.00831359
48598	205.77	0.0113	0.00762	0.00762	0.0113	0.0121	0.0079826
48597	205.774	0.0113	0.00726	0.00726	0.0113	0.0121	0.00769888
48596	205.778	0.0113	0.00735	0.00735	0.0113	0.012	0.00748603
48595	205.782	0.0113	0.00782	0.00782	0.0113	0.0131	0.00732042
48594	205.787	0.0113	0.00794	0.00794	0.0113	0.0114	0.00713121
48593	205.791	0.0113	0.00659	0.00659	0.0113	0.0115	0.00691841
48592	205.795	0.0113	0.00588	0.00588	0.0113	0.0113	0.0068709
48591	205.799	0.0113	0.0063	0.0063	0.0113	0.0099	0.00703589
48590	205.804	0.0113	0.00665	0.00665	0.0113	0.00946	0.00738974
48589	205.808	0.0113	0.0075	0.0075	0.0113	0.00804	0.00788521
48588	205.812	0.0113	0.00928	0.00928	0.0113	0.00931	0.00847508
48587	205.816	0.0113	0.0101	0.0101	0.0113	0.0112	0.00892325
48586	205.821	0.0113	0.00957	0.00957	0.0113	0.0116	0.00915894
48585	205.825	0.0113	0.00928	0.00928	0.0113	0.0111	0.00925298
48584	205.829	0.0113	0.00908	0.00908	0.0113	0.012	0.00920539
48583	205.833	0.0113	0.00891	0.00891	0.0113	0.0135	0.0091106
48582	205.838	0.0113	0.00903	0.00903	0.0113	0.012	0.00901582
48581	205.842	0.0113	0.00899	0.00899	0.0113	0.0122	0.00892105
48580	205.846	0.0113	0.00895	0.00895	0.0113	0.0121	0.00877908
48579	205.85	0.0113	0.00889	0.00889	0.0113	0.012	0.00854273
48578	205.855	0.0113	0.00856	0.00856	0.0113	0.0111	0.00814122
48577	205.859	0.0114	0.00803	0.00803	0.0113	0.011	0.00752737
48576	205.863	0.0114	0.00757	0.00757	0.0113	0.0104	0.00677199
48575	205.867	0.0114	0.00605	0.00605	0.0113	0.0102	0.00587511
48574	205.871	0.0114	0.00432	0.00432	0.0113	0.0103	0.00507268
48573	205.876	0.0114	0.00326	0.00326	0.0113	0.00804	0.00450624
48572	205.88	0.0114	0.00308	0.00308	0.0113	0.00594	0.00434091
48571	205.884	0.0114	0.0034	0.0034	0.0113	0.00467	0.00460023
48570	205.888	0.0114	0.00465	0.00465	0.0113	0.00478	0.00523697
48569	205.893	0.0114	0.0063	0.0063	0.0113	0.00654	0.00610955
48568	205.897	0.0114	0.00763	0.00763	0.0113	0.00778	0.00700564
48567	205.901	0.0114	0.00843	0.00843	0.0113	0.00899	0.00773655
48566	205.905	0.0114	0.00904	0.00904	0.0113	0.0102	0.00825513
48565	205.91	0.0114	0.0092	0.0092	0.0113	0.0109	0.00849064
48564	205.914	0.0114	0.00874	0.00874	0.0113	0.0118	0.00853746
48563	205.918	0.0114	0.00813	0.00813	0.0113	0.0104	0.00848994
48562	205.922	0.0114	0.00799	0.00799	0.0113	0.00969	0.00839526
48561	205.927	0.0114	0.00827	0.00827	0.0113	0.0107	0.00830059
48560	205.931	0.0114	0.0086	0.0086	0.0113	0.0108	0.00822951
48559	205.935	0.0114	0.00849	0.00849	0.0113	0.0108	0.00815843
48558	205.939	0.0114	0.00786	0.00786	0.0113	0.0109	0.00806378
48557	205.944	0.0114	0.0079	0.0079	0.0113	0.0109	0.00808703
48556	205.948	0.0114	0.00782	0.00782	0.0113	0.0116	0.00820458
48555	205.952	0.0114	0.00748	0.00748	0.0113	0.0101	0.00843999
48554	205.956	0.0114	0.00838	0.00838	0.0113	0.00926	0.00888756
48553	205.96	0.0114	0.00995	0.00995	0.0113	0.00934	0.00942938
48552	205.965	0.0114	0.0104	0.0104	0.0113	0.011	0.00994759
48551	205.969	0.0114	0.0106	0.0106	0.0113	0.0103	0.0103243
48550	205.973	0.0114	0.0112	0.0112	0.0113	0.0104	0.0105596
48549	205.977	0.0114	0.0111	0.0111	0.0114	0.013	0.0106063
48548	205.982	0.0114	0.0107	0.0107	0.0114	0.0132	0.0105116
48547	205.986	0.0114	0.00995	0.00995	0.0114	0.0146	0.0103933
48546	205.99	0.0114	0.00989	0.00989	0.0114	0.0131	0.0103458
48545	205.994	0.0114	0.0101	0.0101	0.0114	0.0131	0.0103218
48544	205.999	0.0114	0.0104	0.0104	0.0114	0.0137	0.0102742
48543	206.003	0.0114	0.0107	0.0107	0.0114	0.0145	0.010156
48542	206.007	0.0114	0.0112	0.0112	0.0114	0.0126	0.00989636
48541	206.011	0.0114	0.00986	0.00986	0.0114	0.014	0.00942472
48540	206.016	0.0114	0.00852	0.00852	0.0114	0.0137	0.00888243
48539	206.02	0.0114	0.00761	0.00761	0.0114	0.0117	0.00843443
48538	206.024	0.0114	0.00722	0.00722	0.0114	0.012	0.00819849
48537	206.028	0.0114	0.00714	0.00714	0.0114	0.0136	0.0081746
48536	206.033	0.0114	0.00837	0.00837	0.0114	0.0116	0.00829205
48535	206.037	0.0114	0.00945	0.00945	0.0114	0.0122	0.00836237
48534	206.041	0.0114	0.00975	0.00975	0.0114	0.0121	0.00824425
48533	206.045	0.0114	0.00862	0.00862	0.0114	0.0137	0.0078906
48532	206.05	0.0114	0.00721	0.00721	0.0114	0.0138	0.00744277
48531	206.054	0.0114	0.00595	0.00595	0.0114	0.0113	0.00701852
48530	206.058	0.0114	0.00534	0.00534	0.0114	0.00867	0.00682983
48529	206.062	0.0115	0.00579	0.00579	0.0114	0.00856	0.00687664
48528	206.067	0.0115	0.00742	0.00742	0.0114	0.0091	0.0071825
48527	206.071	0.0115	0.00875	0.00875	0.0114	0.0114	0.00753543
48526	206.075	0.0115	0.00858	0.00858	0.0114	0.0127	0.0077235
48525	206.079	0.0115	0.00798	0.00798	0.0114	0.0119	0.00777027
48524	206.084	0.0115	0.00774	0.00774	0.0114	0.0135	0.0077464
48523	206.088	0.0115	0.00725	0.00725	0.0114	0.0112	0.00767545
48522	206.092	0.0115	0.00644	0.00644	0.0114	0.00969	0.00772222
48521	206.096	0.0115	0.00755	0.00755	0.0114	0.0103	0.00802795
48520	206.101	0.0115	0.00881	0.00881	0.0114	0.0125	0.00847491
48519	206.105	0.0115	0.00908	0.00908	0.0115	0.0136	0.00892183
48518	206.109	0.0115	0.00953	0.00953	0.0115	0.0141	0.00929809
48517	206.113	0.0115	0.0105	0.0105	0.0115	0.0121	0.00948602
48516	206.118	0.0115	0.0103	0.0103	0.0115	0.0141	0.00929733
48515	206.122	0.0115	0.00966	0.00966	0.0115	0.0126	0.00877914
48514	206.126	0.0115	0.00866	0.00866	0.0115	0.0132	0.00802564
48513	206.13	0.0115	0.00688	0.00688	0.0115	0.0136	0.00715453
48512	206.135	0.0115	0.00522	0.00522	0.0115	0.0123	0.00637762
48511	206.139	0.0115	0.00463	0.00463	0.0115	0.0126	0.0059773
48510	206.143	0.0115	0.00474	0.00474	0.0115	0.0117	0.00597706
48509	206.147	0.0115	0.00542	0.00542	0.0115	0.0116	0.00637683
48508	206.152	0.0115	0.00701	0.00701	0.0115	0.0124	0.00701187
48507	206.156	0.0115	0.00871	0.00871	0.0115	0.0123	0.00769392
48506	206.16	0.0115	0.00936	0.00936	0.0115	0.0129	0.00823474
48505	206.164	0.0115	0.00921	0.00921	0.0115	0.0131	0.00851672
48504	206.169	0.0115	0.00871	0.00871	0.0115	0.0129	0.00858695
48503	206.173	0.0115	0.00821	0.00821	0.0115	0.012	0.00851602
48502	206.177	0.0115	0.00808	0.00808	0.0115	0.0111	0.0084451
48501	206.181	0.0115	0.00813	0.00813	0.0115	0.0105	0.00839771
48500	206.186	0.0115	0.00841	0.00841	0.0115	0.00991	0.00837384
48499	206.19	0.0115	0.0088	0.0088	0.0115	0.00918	0.00830293
48498	206.194	0.0115	0.00878	0.00878	0.0115	0.00906	0.00809091
48497	206.198	0.0115	0.00812	0.00812	0.0115	0.00946	0.00769075
48496	206.203	0.0115	0.00756	0.00756	0.0115	0.0123	0.00707896
48495	206.207	0.0115	0.00676	0.00676	0.0115	0.0131	0.0063026
48494	206.211	0.0115	0.00536	0.00536	0.0115	0.0113	0.00545576
48493	206.215	0.0116	0.00402	0.00402	0.0115	0.00972	0.00470305
48492	206.22	0.0116	0.0032	0.0032	0.0115	0.00869	0.00418554
48491	206.224	0.0116	0.00292	0.00292	0.0115	0.00668	0.00402077
48490	206.228	0.0116	0.00328	0.00328	0.0115	0.00668	0.00420871
48489	206.232	0.0116	0.0043	0.0043	0.0116	0.0066	0.00467876
48488	206.237	0.0116	0.00558	0.00558	0.0116	0.00672	0.00531334
48487	206.241	0.0116	0.00668	0.00668	0.0116	0.00733	0.00592437
48486	206.245	0.0116	0.00693	0.00693	0.0116	0.00932	0.00632377
48485	206.249	0.0116	0.00724	0.00724	0.0116	0.00933	0.00655858
48484	206.254	0.0116	0.00711	0.00711	0.0116	0.00999	0.0065113
48483	206.258	0.0116	0.00619	0.00619	0.0116	0.0112	0.00632299
48482	206.262	0.0116	0.00583	0.00583	0.0116	0.00935	0.00611118
48481	206.266	0.0116	0.00575	0.00575	0.0116	0.00684	0.00599342
48480	206.271	0.0116	0.00514	0.00514	0.0116	0.00587	0.00594616
48479	206.275	0.0116	0.00558	0.00558	0.0116	0.00536	0.00606343
48478	206.279	0.0116	0.00681	0.00681	0.0116	0.00819	0.00625118
48477	206.283	0.0116	0.00684	0.00684	0.0116	0.00792	0.00639192
48476	206.288	0.0116	0.00684	0.00684	0.0116	0.0103	0.00648565
48475	206.292	0.0116	0.00654	0.00654	0.0116	0.0113	0.00655588
48474	206.296	0.0116	0.00613	0.00613	0.0116	0.0101	0.0066026
48473	206.3	0.0116	0.00629	0.00629	0.0116	0.00889	0.00664932
48472	206.305	0.0116	0.00681	0.00681	0.0116	0.00827	0.00674303
48471	206.309	0.0116	0.00725	0.00725	0.0116	0.00857	0.00678973
48470	206.313	0.0116	0.00745	0.00745	0.0116	0.00985	0.00681295
48469	206.317	0.0116	0.00662	0.00662	0.0116	0.0116	0.00678917
48468	206.322	0.0116	0.00626	0.00626	0.0116	0.0119	0.00681239
48467	206.326	0.0116	0.00642	0.00642	0.0116	0.0125	0.00692955
48466	206.33	0.0116	0.00685	0.00685	0.0116	0.0117	0.00716416
48465	206.334	0.0116	0.00716	0.00716	0.0116	0.0137	0.00751618
48464	206.339	0.0117	0.00814	0.00814	0.0116	0.0149	0.00798562
48463	206.343	0.0117	0.00888	0.00888	0.0117	0.014	0.00850198
48462	206.347	0.0117	0.00912	0.00912	0.0117	0.0117	0.00897134
48461	206.351	0.0117	0.00908	0.00908	0.0117	0.0112	0.00939368
48460	206.356	0.0117	0.00983	0.00983	0.0117	0.0116	0.00976902
48459	206.36	0.0117	0.0107	0.0107	0.0117	0.0112	0.0100504
48458	206.364	0.0117	0.0107	0.0107	0.0117	0.0135	0.0101674
48457	206.369	0.0117	0.0102	0.0102	0.0117	0.0123	0.0101435
48456	206.373	0.0117	0.0103	0.0103	0.0117	0.0131	0.0100022
48455	206.377	0.0117	0.0103	0.0103	0.0117	0.0127	0.00972005
48454	206.381	0.0117	0.00932	0.00932	0.0117	0.0135	0.00927358
48453	206.386	0.0117	0.0087	0.0087	0.0117	0.013	0.00878019
48452	206.39	0.0117	0.00835	0.00835	0.0117	0.0126	0.00831032
48451	206.394	0.0117	0.00787	0.00787	0.0117	0.012	0.00791091
48450	206.398	0.0117	0.00672	0.00672	0.0117	0.00986	0.0076289
48449	206.403	0.0117	0.00681	0.00681	0.0117	0.00991	0.00758164
48448	206.407	0.0117	0.00735	0.00735	0.0118	0.00906	0.00767521
48447	206.411	0.0117	0.00807	0.00807	0.0118	0.0093	0.00783919
48446	206.415	0.0117	0.00843	0.00843	0.0118	0.0105	0.00790928
48445	206.42	0.0117	0.00911	0.00911	0.0118	0.012	0.00781508
48444	206.424	0.0117	0.00822	0.00822	0.0118	0.0126	0.00746274
48443	206.428	0.0117	0.00699	0.00699	0.0118	0.012	0.00699309
48442	206.432	0.0117	0.006	0.006	0.0118	0.0125	0.00657042
48441	206.437	0.0118	0.00472	0.00472	0.0118	0.0111	0.00635897
48440	206.441	0.0118	0.00502	0.00502	0.0118	0.0102	0.00652295
48439	206.445	0.0118	0.00659	0.00659	0.0118	0.00911	0.00708579
48438	206.45	0.0118	0.00795	0.00795	0.0118	0.00844	0.00790667
48437	206.454	0.0118	0.00905	0.00905	0.0118	0.00879	0.00877439
48436	206.458	0.0118	0.0106	0.0106	0.0118	0.0106	0.00954821
48435	206.462	0.0118	0.0111	0.0111	0.0118	0.0124	0.010017
48434	206.466	0.0118	0.011	0.011	0.0118	0.0134	0.0101573
48433	206.471	0.0118	0.00997	0.00997	0.0118	0.0129	0.0100396
48432	206.475	0.0118	0.00981	0.00981	0.0119	0.0128	0.00975774
48431	206.479	0.0118	0.00937	0.00937	0.0119	0.0131	0.00933514
48430	206.484	0.0118	0.00869	0.00869	0.0119	0.0137	0.00886567
48429	206.488	0.0118	0.00858	0.00858	0.0119	0.0125	0.00844315
48428	206.492	0.0118	0.00826	0.00826	0.0119	0.0119	0.00809102
48427	206.496	0.0118	0.0071	0.0071	0.0119	0.0125	0.00783272
48426	206.501	0.0118	0.00706	0.00706	0.0119	0.0127	0.00780895
48425	206.505	0.0118	0.00753	0.00753	0.0119	0.0118	0.00801967
48424	206.509	0.0119	0.00769	0.00769	0.0119	0.0111	0.00837106
48423	206.513	0.0119	0.00895	0.00895	0.0119	0.0108	0.00888656
48422	206.518	0.0119	0.0101	0.0101	0.0119	0.0116	0.00942546
48421	206.522	0.0119	0.0103	0.0103	0.0119	0.0118	0.00991743
48420	206.526	0.0119	0.0104	0.0104	0.0119	0.0125	0.0102687
48419	206.53	0.0119	0.0107	0.0107	0.0119	0.0126	0.0104793
48418	206.535	0.0119	0.0109	0.0109	0.0119	0.0136	0.0104319
48417	206.539	0.0119	0.0111	0.0111	0.0119	0.0122	0.0101502
48416	206.543	0.0119	0.0107	0.0107	0.012	0.0126	0.00961065
48415	206.548	0.0119	0.00906	0.00906	0.012	0.0134	0.00886018
48414	206.552	0.0119	0.00757	0.00757	0.012	0.0141	0.0080629
48413	206.556	0.0119	0.00681	0.00681	0.012	0.0138	0.00740631
48412	206.56	0.0119	0.00583	0.00583	0.012	0.0131	0.00693727
48411	206.565	0.0119	0.00541	0.00541	0.012	0.013	0.0067495
48410	206.569	0.0119	0.00676	0.00676	0.012	0.0129	0.00686639
48409	206.573	0.0119	0.00792	0.00792	0.012	0.0129	0.00710045
48408	206.577	0.0119	0.00767	0.00767	0.012	0.0136	0.00728762
48407	206.582	0.012	0.00765	0.00765	0.012	0.013	0.00738105
48406	206.586	0.012	0.00764	0.00764	0.012	0.0132	0.00733388
48405	206.59	0.012	0.00735	0.00735	0.012	0.013	0.00709928
48404	206.595	0.012	0.00689	0.00689	0.012	0.0115	0.00667726
48403	206.599	0.012	0.00667	0.00667	0.012	0.0123	0.00611471
48402	206.603	0.012	0.00585	0.00585	0.012	0.00964	0.0054585
48401	206.607	0.012	0.00475	0.00475	0.0121	0.01	0.00482577
48400	206.612	0.012	0.00332	0.00332	0.0121	0.00992	0.0043805
48399	206.616	0.012	0.00276	0.00276	0.0121	0.00905	0.00421635
48398	206.62	0.012	0.00319	0.00319	0.0121	0.0071	0.00442698
48397	206.624	0.012	0.00456	0.00456	0.0121	0.00661	0.00496551
48396	206.629	0.012	0.00619	0.00619	0.0121	0.00757	0.00566794
48395	206.633	0.012	0.00722	0.00722	0.0121	0.00892	0.00632348
48394	206.637	0.012	0.00743	0.00743	0.0121	0.00902	0.00676818
48393	206.642	0.0121	0.00765	0.00765	0.0121	0.0116	0.00695525
48392	206.646	0.0121	0.00749	0.00749	0.0121	0.011	0.00686129
48391	206.65	0.0121	0.00662	0.00662	0.0121	0.0104	0.00660343
48390	206.654	0.0121	0.00609	0.00609	0.0121	0.0118	0.00634558
48389	206.659	0.0121	0.00544	0.00544	0.0121	0.011	0.00618142
48388	206.663	0.0121	0.00532	0.00532	0.0121	0.0104	0.0062514
48387	206.667	0.0121	0.00583	0.00583	0.0121	0.01	0.00657892
48386	206.671	0.0121	0.00712	0.00712	0.0121	0.00903	0.00711712
48385	206.676	0.0121	0.00786	0.00786	0.0122	0.0113	0.0077255
48384	206.68	0.0121	0.00882	0.00882	0.0122	0.0122	0.00828701
48383	206.684	0.0121	0.00944	0.00944	0.0122	0.013	0.00870802
48382	206.688	0.0121	0.00953	0.00953	0.0122	0.0126	0.00884811
48381	206.693	0.0121	0.00922	0.00922	0.0122	0.0134	0.00875412
48380	206.697	0.0122	0.00877	0.00877	0.0122	0.0126	0.00847288
48379	206.701	0.0122	0.00817	0.00817	0.0122	0.0121	0.00812146
48378	206.706	0.0122	0.00715	0.00715	0.0122	0.0125	0.00781688
48377	206.71	0.0122	0.00683	0.00683	0.0122	0.0112	0.00767614
48376	206.714	0.0122	0.00701	0.00701	0.0122	0.00978	0.00774603
48375	206.718	0.0122	0.00779	0.00779	0.0122	0.0102	0.00797972
48374	206.723	0.0122	0.00863	0.00863	0.0122	0.0115	0.00823678
48373	206.727	0.0122	0.00932	0.00932	0.0123	0.0129	0.00849383
48372	206.731	0.0122	0.00916	0.00916	0.0123	0.0128	0.00861047
48371	206.735	0.0122	0.00863	0.00863	0.0123	0.0118	0.00861011
48370	206.74	0.0122	0.00818	0.00818	0.0123	0.013	0.00856297
48369	206.744	0.0122	0.00839	0.00839	0.0123	0.0124	0.00853922
48368	206.748	0.0122	0.00829	0.00829	0.0123	0.0127	0.00853886
48367	206.752	0.0123	0.00843	0.00843	0.0123	0.0121	0.0085853
48366	206.757	0.0123	0.00883	0.00883	0.0123	0.0131	0.00865512
48365	206.761	0.0123	0.0094	0.0094	0.0123	0.0128	0.00874833
48364	206.765	0.0123	0.00854	0.00854	0.0123	0.0133	0.00874796
48363	206.77	0.0123	0.00844	0.00844	0.0123	0.0121	0.00879438
48362	206.774	0.0123	0.00884	0.00884	0.0123	0.0126	0.00879402
48361	206.778	0.0123	0.00897	0.00897	0.0124	0.0131	0.00867672
48360	206.782	0.0123	0.00883	0.00883	0.0124	0.0132	0.00839572
48359	206.787	0.0123	0.00914	0.00914	0.0124	0.0129	0.00797444
48358	206.791	0.0123	0.00801	0.00801	0.0124	0.0136	0.00734273
48357	206.795	0.0123	0.00631	0.00631	0.0124	0.0133	0.00661753
48356	206.8	0.0123	0.00496	0.00496	0.0124	0.0134	0.0060327
48355	206.804	0.0123	0.00443	0.00443	0.0124	0.0107	0.00575187
48354	206.808	0.0123	0.00461	0.00461	0.0124	0.0095	0.00586853
48353	206.812	0.0124	0.00551	0.00551	0.0124	0.00817	0.00638264
48352	206.817	0.0124	0.00703	0.00703	0.0124	0.00981	0.00717725
48351	206.821	0.0124	0.00878	0.00878	0.0124	0.0111	0.00808869
48350	206.825	0.0124	0.00981	0.00981	0.0124	0.0132	0.00885979
48349	206.829	0.0124	0.01	0.01	0.0125	0.0135	0.00937369
48348	206.834	0.0124	0.0103	0.0103	0.0125	0.0118	0.0095603
48347	206.838	0.0124	0.0102	0.0102	0.0125	0.0124	0.00941966
48346	206.842	0.0124	0.0096	0.0096	0.0125	0.0137	0.00902193
48345	206.847	0.0124	0.00833	0.00833	0.0125	0.0123	0.00843726
48344	206.851	0.0124	0.00738	0.00738	0.0125	0.0132	0.00787601
48343	206.855	0.0124	0.00719	0.00719	0.0125	0.0119	0.00745502
48342	206.859	0.0124	0.00631	0.00631	0.0125	0.012	0.00722102
48341	206.864	0.0124	0.00609	0.00609	0.0125	0.0107	0.00726746
48340	206.868	0.0124	0.00727	0.00727	0.0125	0.0102	0.00761767
48339	206.872	0.0124	0.00848	0.00848	0.0125	0.0105	0.00810804
48338	206.877	0.0125	0.00871	0.00871	0.0125	0.0132	0.00859837
48337	206.881	0.0125	0.00961	0.00961	0.0126	0.0119	0.00899521
48336	206.885	0.0125	0.00996	0.00996	0.0126	0.0115	0.00922847
48335	206.889	0.0125	0.00969	0.00969	0.0126	0.0129	0.00925145
48334	206.894	0.0125	0.00934	0.00934	0.0126	0.0141	0.00908754
48333	206.898	0.0125	0.00872	0.00872	0.0126	0.0126	0.00880684
48332	206.902	0.0125	0.00831	0.00831	0.0126	0.014	0.00840936
48331	206.906	0.0125	0.00811	0.00811	0.0126	0.0115	0.0079652
48330	206.911	0.0125	0.00792	0.00792	0.0126	0.0108	0.00747437
48329	206.915	0.0125	0.00714	0.00714	0.0126	0.0109	0.00696022
48328	206.919	0.0125	0.0062	0.0062	0.0126	0.00993	0.00649282
48327	206.924	0.0125	0.00536	0.00536	0.0126	0.0113	0.0062123
48326	206.928	0.0125	0.00529	0.00529	0.0126	0.0118	0.00618869
48325	206.932	0.0126	0.00537	0.00537	0.0127	0.0109	0.0063986
48324	206.936	0.0126	0.00638	0.00638	0.0127	0.009	0.00681867
48323	206.941	0.0126	0.00827	0.00827	0.0127	0.00929	0.00730875
48322	206.945	0.0126	0.0089	0.0089	0.0127	0.0104	0.00765869
48321	206.949	0.0126	0.00841	0.00841	0.0127	0.0116	0.00775177
48320	206.954	0.0126	0.00807	0.00807	0.0127	0.0124	0.00770475
48319	206.958	0.0126	0.00712	0.00712	0.0127	0.0117	0.00756436
48318	206.962	0.0126	0.00647	0.00647	0.0127	0.0125	0.00747066
48317	206.966	0.0126	0.00674	0.00674	0.0127	0.0123	0.00756373
48316	206.971	0.0126	0.00765	0.00765	0.0127	0.0115	0.00789023
48315	206.975	0.0126	0.00834	0.00834	0.0127	0.00956	0.00833342
48314	206.979	0.0126	0.00927	0.00927	0.0128	0.00837	0.00879991
48313	206.984	0.0127	0.00961	0.00961	0.0128	0.0102	0.00919634
48312	206.988	0.0127	0.01	0.01	0.0128	0.0129	0.00940602
48311	206.992	0.0127	0.00979	0.00979	0.0128	0.0127	0.0093823
48310	206.996	0.0127	0.00945	0.00945	0.0128	0.0126	0.00917186
48309	207.001	0.0127	0.00937	0.00937	0.0128	0.012	0.00884476
48308	207.005	0.0127	0.00847	0.00847	0.0128	0.0128	0.00847102
48307	207.009	0.0127	0.00718	0.00718	0.0128	0.0129	0.00814398
48306	207.014	0.0127	0.00731	0.00731	0.0128	0.0121	0.00802697
48305	207.018	0.0127	0.00778	0.00778	0.0128	0.0128	0.00809664
48304	207.022	0.0127	0.00785	0.00785	0.0128	0.0101	0.00832962
48303	207.026	0.0127	0.00861	0.00861	0.0128	0.0098	0.00867925
48302	207.031	0.0127	0.00984	0.00984	0.0129	0.0104	0.00907551
48301	207.035	0.0128	0.00988	0.00988	0.0129	0.0111	0.00937841
48300	207.039	0.0128	0.0094	0.0094	0.0129	0.0114	0.00951799
48299	207.044	0.0128	0.00975	0.00975	0.0129	0.0113	0.00963424
48298	207.048	0.0128	0.01	0.01	0.0129	0.0102	0.00965717
48297	207.052	0.0128	0.00941	0.00941	0.0129	0.0131	0.00963344
48296	207.056	0.0128	0.00932	0.00932	0.0129	0.0129	0.00970301
48295	207.061	0.0128	0.00968	0.00968	0.0129	0.012	0.00984255
48294	207.065	0.0128	0.00981	0.00981	0.0129	0.0104	0.0100287
48293	207.069	0.0128	0.0101	0.0101	0.0129	0.0102	0.0101916
48292	207.074	0.0128	0.0111	0.0111	0.0129	0.0112	0.0102844
48291	207.078	0.0128	0.011	0.011	0.0129	0.0132	0.0101907
48290	207.082	0.0128	0.0107	0.0107	0.0129	0.014	0.00991047
48289	207.087	0.0128	0.00957	0.00957	0.0129	0.0108	0.00951366
48288	207.091	0.0129	0.00827	0.00827	0.013	0.0115	0.00911688
48287	207.095	0.0129	0.00787	0.00787	0.013	0.0108	0.00888334
48286	207.099	0.0129	0.00836	0.00836	0.013	0.0109	0.00888297
48285	207.104	0.0129	0.00854	0.00854	0.013	0.0123	0.00906912
48284	207.108	0.0129	0.00942	0.00942	0.013	0.0124	0.00941844
48283	207.112	0.0129	0.0105	0.0105	0.013	0.0116	0.00981435
48282	207.117	0.0129	0.0107	0.0107	0.013	0.0132	0.0100704
48281	207.121	0.0129	0.0105	0.0105	0.013	0.0134	0.0101632
48280	207.125	0.0129	0.0103	0.0103	0.013	0.0136	0.0101628
48279	207.129	0.0129	0.00994	0.00994	0.013	0.0143	0.0101157
48278	207.134	0.0129	0.00974	0.00974	0.013	0.0134	0.0101153
48277	207.138	0.0129	0.00975	0.00975	0.013	0.0117	0.0102547
48276	207.142	0.0129	0.0101	0.0101	0.013	0.0113	0.0105107
48275	207.147	0.013	0.0108	0.0108	0.0131	0.013	0.0108365
48274	207.151	0.013	0.0116	0.0116	0.0131	0.0142	0.0111856
48273	207.155	0.013	0.0121	0.0121	0.0131	0.0145	0.0113948
48272	207.159	0.013	0.0121	0.0121	0.0131	0.0147	0.0114876
48271	207.164	0.013	0.0118	0.0118	0.0131	0.0132	0.0114405
48270	207.168	0.013	0.011	0.011	0.0131	0.0128	0.0113002
48269	207.172	0.013	0.0106	0.0106	0.0131	0.0143	0.01116
48268	207.177	0.013	0.0108	0.0108	0.0131	0.0117	0.0110896
48267	207.181	0.013	0.0112	0.0112	0.0131	0.0133	0.0110892
48266	207.185	0.013	0.011	0.011	0.0131	0.0137	0.0110654
48265	207.19	0.013	0.0115	0.0115	0.0131	0.0134	0.0110417
48264	207.194	0.013	0.0114	0.0114	0.0131	0.0127	0.0109247
48263	207.198	0.0131	0.0109	0.0109	0.0131	0.0128	0.0107146
48262	207.202	0.0131	0.0101	0.0101	0.0131	0.0125	0.0104813
48261	207.207	0.0131	0.00994	0.00994	0.0132	0.0116	0.0103178
48260	207.211	0.0131	0.0098	0.0098	0.0132	0.0118	0.0102475
48259	207.215	0.0131	0.00997	0.00997	0.0132	0.0113	0.0102937
48258	207.22	0.0131	0.0103	0.0103	0.0132	0.0107	0.0103631
48257	207.224	0.0131	0.0109	0.0109	0.0132	0.0112	0.0104325
48256	207.228	0.0131	0.0112	0.0112	0.0132	0.0108	0.0103855
48255	207.232	0.0131	0.0109	0.0109	0.0132	0.0119	0.0102221
48254	207.237	0.0131	0.00957	0.00957	0.0132	0.0119	0.00998884
48253	207.241	0.0131	0.00899	0.00899	0.0132	0.0128	0.00984872
48252	207.245	0.0131	0.00911	0.00911	0.0132	0.0117	0.00984832
48251	207.25	0.0131	0.00952	0.00952	0.0132	0.00916	0.0099876
48250	207.254	0.0131	0.0103	0.0103	0.0132	0.00965	0.01022
48249	207.258	0.0132	0.0116	0.0116	0.0132	0.0122	0.0104291
48248	207.262	0.0132	0.0112	0.0112	0.0132	0.0131	0.0103821
48247	207.267	0.0132	0.0106	0.0106	0.0133	0.0126	0.0101256
48246	207.271	0.0132	0.0101	0.0101	0.0133	0.0114	0.00970621
48245	207.275	0.0132	0.00897	0.00897	0.0133	0.0112	0.00917048
48244	207.28	0.0132	0.00782	0.00782	0.0133	0.0106	0.00865806
48243	207.284	0.0132	0.00779	0.00779	0.0133	0.0109	0.00840169
48242	207.288	0.0132	0.00781	0.00781	0.0133	0.0105	0.00840134
48241	207.293	0.0132	0.008	0.008	0.0133	0.00992	0.00865698
48240	207.297	0.0132	0.00856	0.00856	0.0133	0.0105	0.0091453
48239	207.301	0.0132	0.00988	0.00988	0.0133	0.0105	0.00974993
48238	207.305	0.0132	0.011	0.011	0.0133	0.014	0.0102614
48237	207.31	0.0132	0.0116	0.0116	0.0133	0.0138	0.0105402
48236	207.314	0.0133	0.0113	0.0113	0.0133	0.0141	0.0105165
48235	207.318	0.0133	0.0111	0.0111	0.0133	0.0147	0.0102136
48234	207.323	0.0133	0.0101	0.0101	0.0133	0.0136	0.00967812
48233	207.327	0.0133	0.00837	0.00837	0.0134	0.0139	0.00909612
48232	207.331	0.0133	0.00762	0.00762	0.0134	0.0138	0.00867701
48231	207.335	0.0133	0.00747	0.00747	0.0134	0.0119	0.00851382
48230	207.34	0.0133	0.00802	0.00802	0.0134	0.0129	0.00860651
48229	207.344	0.0133	0.00895	0.00895	0.0134	0.0125	0.00888527
48228	207.348	0.0133	0.00983	0.00983	0.0134	0.0119	0.00925705
48227	207.353	0.0133	0.0101	0.0101	0.0134	0.0122	0.0095125
48226	207.357	0.0133	0.0101	0.0101	0.0134	0.0122	0.00960514
48225	207.361	0.0133	0.00979	0.00979	0.0134	0.012	0.00953497
48224	207.366	0.0133	0.00948	0.00948	0.0134	0.0133	0.00934853
48223	207.37	0.0134	0.00884	0.00884	0.0134	0.0143	0.00904584
48222	207.374	0.0134	0.0085	0.0085	0.0134	0.0136	0.00874318
48221	207.379	0.0134	0.00873	0.00873	0.0134	0.0137	0.00844054
48220	207.383	0.0134	0.00845	0.00845	0.0135	0.0125	0.00813792
48219	207.387	0.0134	0.00756	0.00756	0.0135	0.0106	0.00785858
48218	207.391	0.0134	0.00739	0.00739	0.0135	0.011	0.00771876
48217	207.396	0.0134	0.00725	0.00725	0.0135	0.0128	0.00771844
48216	207.4	0.0134	0.0071	0.0071	0.0135	0.0129	0.00795059
48215	207.404	0.0134	0.00769	0.00769	0.0135	0.0129	0.00846168
48214	207.409	0.0134	0.00872	0.00872	0.0135	0.014	0.00913545
48213	207.413	0.0134	0.0103	0.0103	0.0135	0.0152	0.00992538
48212	207.417	0.0134	0.0114	0.0114	0.0135	0.0144	0.0106455
48211	207.422	0.0134	0.012	0.012	0.0135	0.0147	0.0111797
48210	207.426	0.0134	0.0118	0.0118	0.0135	0.0146	0.0114581
48209	207.43	0.0135	0.0119	0.0119	0.0135	0.0147	0.0115041
48208	207.435	0.0135	0.0117	0.0117	0.0135	0.016	0.0113642
48207	207.439	0.0135	0.0113	0.0113	0.0135	0.0142	0.0110616
48206	207.443	0.0135	0.0105	0.0105	0.0135	0.0147	0.0107126
48205	207.447	0.0135	0.0101	0.0101	0.0135	0.0154	0.0104333
48204	207.452	0.0135	0.00993	0.00993	0.0136	0.0155	0.010247
48203	207.456	0.0135	0.00977	0.00977	0.0136	0.0142	0.0101071
48202	207.46	0.0135	0.00983	0.00983	0.0136	0.0133	0.00994409
48201	207.465	0.0135	0.0105	0.0105	0.0136	0.0146	0.00975781
48200	207.469	0.0135	0.0106	0.0106	0.0136	0.0146	0.00936246
48199	207.473	0.0135	0.00931	0.00931	0.0136	0.0139	0.0087813
48198	207.477	0.0135	0.00773	0.00773	0.0136	0.0163	0.0081305
48197	207.482	0.0135	0.00698	0.00698	0.0136	0.0144	0.00757266
48196	207.486	0.0136	0.00609	0.00609	0.0136	0.0134	0.00717747
48195	207.49	0.0136	0.00598	0.00598	0.0136	0.0109	0.00708427
48194	207.495	0.0136	0.00682	0.00682	0.0136	0.0114	0.00729301
48193	207.499	0.0136	0.0081	0.0081	0.0136	0.012	0.00775721
48192	207.503	0.0136	0.00824	0.00824	0.0136	0.0114	0.00831427
48191	207.508	0.0136	0.00891	0.00891	0.0136	0.0126	0.0089874
48190	207.512	0.0136	0.00964	0.00964	0.0136	0.0138	0.00966047
48189	207.516	0.0136	0.0103	0.0103	0.0136	0.0123	0.0102638
48188	207.52	0.0136	0.0109	0.0109	0.0137	0.0126	0.0107742
48187	207.525	0.0136	0.0118	0.0118	0.0137	0.0117	0.0111685
48186	207.529	0.0136	0.0122	0.0122	0.0137	0.0109	0.0113074
48185	207.534	0.0136	0.0119	0.0119	0.0137	0.0118	0.0111676
48184	207.538	0.0136	0.0111	0.0111	0.0137	0.0129	0.0107725
48183	207.542	0.0136	0.0104	0.0104	0.0137	0.0132	0.0102148
48182	207.546	0.0137	0.00957	0.00957	0.0137	0.0124	0.00961083
48181	207.551	0.0137	0.00861	0.00861	0.0137	0.0135	0.00903009
48180	207.555	0.0137	0.0076	0.0076	0.0137	0.0124	0.00861189
48179	207.559	0.0137	0.0079	0.0079	0.0137	0.0136	0.00844905
48178	207.564	0.0137	0.00848	0.00848	0.0137	0.0145	0.00854154
48177	207.568	0.0137	0.0084	0.0084	0.0137	0.0146	0.0087965
48176	207.572	0.0137	0.00865	0.00865	0.0137	0.0151	0.00921389
48175	207.577	0.0137	0.0099	0.0099	0.0137	0.0139	0.00974729
48174	207.581	0.0137	0.0107	0.0107	0.0137	0.0141	0.010211
48173	207.585	0.0137	0.0109	0.0109	0.0137	0.013	0.0105355
48172	207.589	0.0137	0.0115	0.0115	0.0138	0.0122	0.0107439
48171	207.594	0.0137	0.0113	0.0113	0.0138	0.0131	0.0107898
48170	207.598	0.0137	0.0104	0.0104	0.0138	0.0153	0.010743
48169	207.602	0.0137	0.0101	0.0101	0.0138	0.0153	0.0107425
48168	207.607	0.0137	0.0104	0.0104	0.0138	0.0143	0.0107885
48167	207.611	0.0138	0.0107	0.0107	0.0138	0.015	0.0108345
48166	207.615	0.0138	0.0114	0.0114	0.0138	0.0144	0.0108804
48165	207.62	0.0138	0.0121	0.0121	0.0138	0.015	0.0108568
48164	207.624	0.0138	0.011	0.011	0.0138	0.0148	0.0106939
48163	207.628	0.0138	0.00971	0.00971	0.0138	0.015	0.0105079
48162	207.633	0.0138	0.00961	0.00961	0.0138	0.015	0.0104147
48161	207.637	0.0138	0.01	0.01	0.0138	0.013	0.0104606
48160	207.641	0.0138	0.0102	0.0102	0.0138	0.0119	0.0106226
48159	207.645	0.0138	0.0112	0.0112	0.0138	0.0124	0.0108309
48158	207.65	0.0138	0.0118	0.0118	0.0138	0.0127	0.0109696
48157	207.654	0.0138	0.0119	0.0119	0.0138	0.0148	0.0109227
48156	207.658	0.0138	0.0114	0.0114	0.0138	0.0137	0.010644
48155	207.663	0.0138	0.00994	0.00994	0.0139	0.0133	0.010203
48154	207.667	0.0138	0.00919	0.00919	0.0139	0.0144	0.00973879
48153	207.671	0.0138	0.00906	0.00906	0.0139	0.014	0.00943696
48152	207.676	0.0138	0.00861	0.00861	0.0139	0.0125	0.00932064
48151	207.68	0.0139	0.0082	0.0082	0.0139	0.0131	0.00938981
48150	207.684	0.0139	0.00974	0.00974	0.0139	0.0127	0.00962125
48149	207.689	0.0139	0.011	0.011	0.0139	0.0135	0.00978313
48148	207.693	0.0139	0.0112	0.0112	0.0139	0.0153	0.00978273
48147	207.697	0.0139	0.00972	0.00972	0.0139	0.0145	0.00959687
48146	207.702	0.0139	0.00886	0.00886	0.0139	0.0143	0.00938786
48145	207.706	0.0139	0.0084	0.0084	0.0139	0.0156	0.00931793
48144	207.71	0.0139	0.00828	0.00828	0.0139	0.0151	0.00945661
48143	207.714	0.0139	0.00871	0.00871	0.0139	0.0143	0.00989658
48142	207.719	0.0139	0.0107	0.0107	0.0139	0.013	0.0106146
48141	207.723	0.0139	0.0123	0.0123	0.0139	0.0144	0.011379
48140	207.727	0.0139	0.0129	0.0129	0.0139	0.0151	0.0120274
48139	207.732	0.0139	0.0128	0.0128	0.014	0.0151	0.0125367
48138	207.736	0.0139	0.013	0.013	0.014	0.0158	0.0128606
48137	207.74	0.014	0.013	0.013	0.014	0.014	0.0130454
48136	207.745	0.014	0.0131	0.0131	0.014	0.0142	0.0131144
48135	207.749	0.014	0.0133	0.0133	0.014	0.0142	0.0131138
48134	207.753	0.014	0.0135	0.0135	0.014	0.0147	0.0130438
48133	207.758	0.014	0.0133	0.0133	0.014	0.0163	0.0128811
48132	207.762	0.014	0.0125	0.0125	0.014	0.0145	0.012672
48131	207.766	0.014	0.0121	0.0121	0.014	0.0154	0.012463
48130	207.771	0.014	0.012	0.012	0.014	0.0161	0.0123003
48129	207.775	0.014	0.012	0.012	0.014	0.0143	0.0120914
48128	207.779	0.014	0.0122	0.0122	0.014	0.0137	0.0117897
48127	207.784	0.014	0.0125	0.0125	0.014	0.015	0.0113492
48126	207.788	0.014	0.0118	0.0118	0.014	0.0148	0.0107234
48125	207.792	0.014	0.0096	0.0096	0.0141	0.0158	0.00998182
48124	207.797	0.014	0.00814	0.00814	0.0141	0.0157	0.00937928
48123	207.801	0.014	0.00785	0.00785	0.0141	0.0159	0.00903152
48122	207.805	0.0141	0.00806	0.00806	0.0141	0.0146	0.00896168
48121	207.81	0.0141	0.00858	0.00858	0.0141	0.0133	0.00916971
48120	207.814	0.0141	0.0102	0.0102	0.0141	0.0129	0.0095398
48119	207.818	0.0141	0.011	0.011	0.0141	0.0118	0.00984041
48118	207.822	0.0141	0.0106	0.0106	0.0141	0.0108	0.00993261
48117	207.827	0.0141	0.0103	0.0103	0.0141	0.0106	0.00986274
48116	207.831	0.0141	0.00933	0.00933	0.0141	0.0101	0.00958452
48115	207.835	0.0141	0.00896	0.00896	0.0141	0.011	0.00930632
48114	207.84	0.0141	0.0091	0.0091	0.0141	0.0117	0.00914389
48113	207.844	0.0141	0.00854	0.00854	0.0141	0.0131	0.00909721
48112	207.848	0.0141	0.00815	0.00815	0.0142	0.0139	0.00923572
48111	207.853	0.0141	0.00966	0.00966	0.0142	0.0159	0.00955938
48110	207.857	0.0141	0.0104	0.0104	0.0142	0.016	0.00983673
48109	207.861	0.0141	0.0104	0.0104	0.0142	0.0151	0.00995204
48108	207.866	0.0142	0.0109	0.0109	0.0142	0.0148	0.0098822
48107	207.87	0.0142	0.0107	0.0107	0.0142	0.0136	0.00962722
48106	207.874	0.0142	0.00876	0.00876	0.0142	0.0134	0.00923342
48105	207.879	0.0142	0.00789	0.00789	0.0142	0.012	0.00895535
48104	207.883	0.0142	0.0075	0.0075	0.0142	0.011	0.00897811
48103	207.887	0.0142	0.00827	0.00827	0.0142	0.0109	0.00934796
48102	207.892	0.0142	0.0095	0.0095	0.0142	0.0114	0.0100417
48101	207.896	0.0142	0.0114	0.0114	0.0142	0.0124	0.0108973
48100	207.9	0.0142	0.0126	0.0126	0.0143	0.0146	0.0117298
48099	207.905	0.0142	0.0133	0.0133	0.0143	0.0158	0.0123308
48098	207.909	0.0142	0.0134	0.0134	0.0143	0.0147	0.0126079
48097	207.913	0.0142	0.0132	0.0132	0.0143	0.0143	0.0125611
48096	207.917	0.0142	0.0127	0.0127	0.0143	0.0137	0.0122136
48095	207.922	0.0142	0.0118	0.0118	0.0143	0.014	0.0116579
48094	207.926	0.0143	0.011	0.011	0.0143	0.0135	0.0110329
48093	207.93	0.0143	0.0104	0.0104	0.0143	0.0133	0.0104543
48092	207.935	0.0143	0.00906	0.00906	0.0143	0.0121	0.00999126
48091	207.939	0.0143	0.00904	0.00904	0.0143	0.0108	0.0097827
48090	207.943	0.0143	0.0094	0.0094	0.0143	0.0103	0.00989793
48089	207.948	0.0143	0.00956	0.00956	0.0143	0.00993	0.0102675
48088	207.952	0.0143	0.0103	0.0103	0.0143	0.0104	0.0108914
48087	207.956	0.0143	0.0119	0.0119	0.0144	0.0109	0.0117003
48086	207.961	0.0143	0.0127	0.0127	0.0144	0.0114	0.0125091
48085	207.965	0.0143	0.0136	0.0136	0.0144	0.0134	0.0132484
48084	207.969	0.0143	0.0145	0.0145	0.0144	0.014	0.013849
48083	207.974	0.0143	0.0149	0.0149	0.0144	0.0136	0.0141952
48082	207.978	0.0143	0.0148	0.0148	0.0144	0.0142	0.0142871
48081	207.982	0.0144	0.0145	0.0145	0.0144	0.0153	0.014194
48080	207.987	0.0144	0.014	0.014	0.0144	0.0171	0.0139392
48079	207.991	0.0144	0.0135	0.0135	0.0144	0.0175	0.013615
48078	207.995	0.0144	0.0134	0.0134	0.0144	0.0176	0.0132677
48077	208	0.0144	0.013	0.013	0.0144	0.0173	0.0129204
48076	208.004	0.0144	0.0122	0.0122	0.0144	0.0174	0.0125963
48075	208.008	0.0144	0.0122	0.0122	0.0144	0.0156	0.0123647
48074	208.013	0.0144	0.0123	0.0123	0.0145	0.0154	0.0122255
48073	208.017	0.0144	0.0118	0.0118	0.0145	0.0142	0.0121557
48072	208.021	0.0144	0.0116	0.0116	0.0145	0.0125	0.0122014
48071	208.026	0.0144	0.0123	0.0123	0.0145	0.0108	0.0123395
48070	208.03	0.0145	0.0128	0.0128	0.0145	0.0115	0.0125239
48069	208.034	0.0145	0.0129	0.0129	0.0145	0.0126	0.0126389
48068	208.039	0.0145	0.0128	0.0128	0.0145	0.0135	0.0127077
48067	208.043	0.0145	0.0131	0.0131	0.0145	0.0134	0.012684
48066	208.047	0.0145	0.0129	0.0129	0.0145	0.0137	0.0125449
48065	208.052	0.0145	0.0123	0.0123	0.0145	0.0156	0.0122902
48064	208.056	0.0145	0.0119	0.0119	0.0145	0.0166	0.0119894
48063	208.06	0.0145	0.0121	0.0121	0.0145	0.0157	0.0116655
48062	208.065	0.0145	0.011	0.011	0.0145	0.0164	0.0112262
48061	208.069	0.0145	0.0107	0.0107	0.0146	0.0171	0.0107637
48060	208.073	0.0145	0.0109	0.0109	0.0146	0.0163	0.0103013
48059	208.078	0.0146	0.0102	0.0102	0.0146	0.0149	0.00976969
48058	208.082	0.0146	0.00828	0.00828	0.0146	0.0134	0.00923809
48057	208.086	0.0146	0.00839	0.00839	0.0146	0.0111	0.0088682
48056	208.091	0.0146	0.0086	0.0086	0.0146	0.0101	0.00868309
48055	208.095	0.0146	0.00811	0.00811	0.0146	0.0104	0.00861345
48054	208.099	0.0146	0.00804	0.00804	0.0146	0.0117	0.00879782
48053	208.104	0.0146	0.00889	0.00889	0.0146	0.0123	0.00928235
48052	208.108	0.0146	0.00977	0.00977	0.0146	0.0122	0.00992847
48051	208.112	0.0146	0.0103	0.0103	0.0146	0.0126	0.0107131
48050	208.117	0.0146	0.0113	0.0113	0.0147	0.0145	0.0115669
48049	208.121	0.0146	0.0129	0.0129	0.0147	0.0154	0.0123513
48048	208.125	0.0147	0.0142	0.0142	0.0147	0.0162	0.0128587
48047	208.13	0.0147	0.0144	0.0144	0.0147	0.0163	0.0129505
48046	208.134	0.0147	0.0139	0.0139	0.0147	0.014	0.0126268
48045	208.138	0.0147	0.0127	0.0127	0.0147	0.0134	0.0119107
48044	208.143	0.0147	0.0105	0.0105	0.0147	0.0147	0.0109869
48043	208.147	0.0147	0.0092	0.0092	0.0147	0.013	0.0101556
48042	208.151	0.0147	0.00837	0.00837	0.0148	0.0111	0.00964738
48041	208.155	0.0147	0.00807	0.00807	0.0148	0.0114	0.00948543
48040	208.16	0.0147	0.00879	0.00879	0.0148	0.0128	0.00964658
48039	208.164	0.0148	0.0107	0.0107	0.0148	0.0127	0.00999233
48038	208.168	0.0148	0.0116	0.0116	0.0148	0.0129	0.0102227
48037	208.173	0.0148	0.0117	0.0117	0.0148	0.0131	0.0101761
48036	208.177	0.0148	0.0103	0.0103	0.0148	0.0137	0.00980649
48035	208.181	0.0148	0.00912	0.00912	0.0149	0.0144	0.0092754
48034	208.186	0.0148	0.00795	0.00795	0.0149	0.0134	0.00869821
48033	208.19	0.0148	0.00721	0.00721	0.0149	0.0116	0.00830564
48032	208.195	0.0148	0.0072	0.0072	0.0149	0.0115	0.00823608
48031	208.199	0.0149	0.00828	0.00828	0.0149	0.0106	0.00851257
48030	208.203	0.0149	0.00862	0.00862	0.0149	0.0111	0.00904278
48029	208.208	0.0149	0.00955	0.00955	0.0149	0.0115	0.00980363
48028	208.212	0.0149	0.0107	0.0107	0.015	0.0132	0.0106797
48027	208.216	0.0149	0.0116	0.0116	0.015	0.0133	0.0115327
48026	208.22	0.0149	0.0125	0.0125	0.015	0.013	0.0123395
48025	208.225	0.0149	0.0137	0.0137	0.015	0.0117	0.013054
48024	208.229	0.0149	0.0141	0.0141	0.015	0.0124	0.0136069
48023	208.234	0.015	0.0141	0.0141	0.015	0.0152	0.0139984
48022	208.238	0.015	0.0143	0.0143	0.015	0.0166	0.0141823
48021	208.242	0.015	0.0147	0.0147	0.0151	0.0172	0.0141125
48020	208.247	0.015	0.0147	0.0147	0.0151	0.016	0.0137199
48019	208.251	0.015	0.0143	0.0143	0.0151	0.0151	0.0129815
48018	208.255	0.015	0.0129	0.0129	0.0151	0.0125	0.0119434
48017	208.26	0.015	0.0104	0.0104	0.0151	0.0113	0.0107671
48016	208.264	0.015	0.00853	0.00853	0.0151	0.01	0.00979833
48015	208.268	0.0151	0.00744	0.00744	0.0151	0.0111	0.00919852
48014	208.273	0.0151	0.00705	0.00705	0.0152	0.0128	0.00912897
48013	208.277	0.0151	0.00837	0.00837	0.0152	0.0138	0.00956658
48012	208.281	0.0151	0.0109	0.0109	0.0152	0.0153	0.0103499
48011	208.286	0.0151	0.0124	0.0124	0.0152	0.0154	0.0111101
48010	208.29	0.0151	0.0127	0.0127	0.0152	0.015	0.0116398
48009	208.294	0.0151	0.0129	0.0129	0.0152	0.0138	0.0118698
48008	208.299	0.0152	0.0124	0.0124	0.0152	0.013	0.0118002
48007	208.303	0.0152	0.0112	0.0112	0.0153	0.0126	0.0115462
48006	208.307	0.0152	0.0103	0.0103	0.0153	0.0117	0.0113383
48005	208.312	0.0152	0.0106	0.0106	0.0153	0.0115	0.0113378
48004	208.316	0.0152	0.0112	0.0112	0.0153	0.0119	0.0115217
48003	208.32	0.0152	0.0117	0.0117	0.0153	0.013	0.0118438
48002	208.325	0.0152	0.0125	0.0125	0.0153	0.0136	0.0121659
[truncated: 47,952 more rows]
