# Supplementary material for: Towards global carbon transparency: Spaceborne imaging spectroscopy enables precise CO2 emission quantification at facility scale
Source: Research Square preprint supplement (doi:10.21203/rs.3.rs-5913782/v1), 2025-01-29
Supplement: Supplementary file 28 [file H2O_k_v2.xlsx]

## Sheet: k_ZY1E
Wavelength	FWHM	k_Summer_M	k_Winter_M	k_1976_M
1005.6	16.26	0.00580059	0.00580059	0.00580059
1022.21	16.26	0.00572371	0.00572371	0.00572371
1039.19	16.26	0.000379315	0.000379315	0.000379315
1055.87	16.26	0.000130139	0.000130139	0.000130139
1072.55	16.26	0.00846519	0.00846519	0.00846519
1089.23	16.26	0.0335399	0.0335399	0.0335399
1105.91	16.26	0.180872	0.180872	0.180872
1122.59	16.26	0.831249	0.831249	0.831249
1139.44	16.26	0.509782	0.509782	0.509782
1156.41	16.26	0.382346	0.382346	0.382346
1173.29	16.26	0.118172	0.118172	0.118172
1190.17	16.26	0.102925	0.102925	0.102925
1207.04	16.26	0.0648555	0.0648555	0.0648555
1223.92	16.26	0.0399842	0.0399842	0.0399842
1240.8	16.26	0.00194454	0.00194454	0.00194454
1257.4	16.26	0.000672399	0.000672399	0.000672399
1274.15	16.26	0.00525525	0.00525525	0.00525525
1290.9	16.26	0.0282716	0.0282716	0.0282716
1307.65	16.26	0.128282	0.128282	0.128282
1324.4	16.26	0.234582	0.234582	0.234582
1341.16	16.26	0.539082	0.539082	0.539082
1357.91	16.26	0.945449	0.945449	0.945449
1374.87	16.26	1.42591	1.42591	1.42591
1391.65	16.26	1.57734	1.57734	1.57734
1408.49	16.26	1.82449	1.82449	1.82449
1425.33	16.26	1.42024	1.42024	1.42024
1442.17	16.26	1.26889	1.26889	1.26889
1459.01	16.26	0.724856	0.724856	0.724856
1475.85	16.26	0.792588	0.792588	0.792588
1492.7	16.26	0.327786	0.327786	0.327786
1509.54	16.26	0.116509	0.116509	0.116509
1526.38	16.26	0.0466822	0.0466822	0.0466822
1543.22	16.26	0.0137152	0.0137152	0.0137152
1560.06	16.26	0.0045938	0.0045938	0.0045938
1576.9	16.26	0.00366104	0.00366104	0.00366104
1593.71	16.26	0.00547913	0.00547913	0.00547913
1610.39	16.26	0.00203958	0.00203958	0.00203958
1627.13	16.26	0.00109945	0.00109945	0.00109945
1644.01	16.26	0.00432549	0.00432549	0.00432549
1660.89	16.26	0.00858319	0.00858319	0.00858319
1677.77	16.26	0.00741142	0.00741142	0.00741142
1694.65	16.26	0.0230133	0.0230133	0.0230133
1711.53	16.26	0.0411721	0.0411721	0.0411721
1728.41	16.26	0.0606106	0.0606106	0.0606106
1745.28	16.26	0.0967519	0.0967519	0.0967519
1762.16	16.26	0.136042	0.136042	0.136042
1778.85	16.26	0.310236	0.310236	0.310236
1795.43	16.26	0.684767	0.684767	0.684767
1812.02	16.26	1.85834	1.85834	1.85834
1828.82	16.26	2.20595	2.20595	2.20595
1845.62	16.26	1.48499	1.48499	1.48499
1862.42	16.26	1.63618	1.63618	1.63618
1880.13	16.26	1.98844	1.98844	1.98844
1896.11	16.26	2.07566	2.07566	2.07566
1912.97	16.26	2.13606	2.13606	2.13606
1929.93	16.26	2.33619	2.33619	2.33619
1946.82	16.26	1.27595	1.27595	1.27595
1963.72	16.26	0.491432	0.491432	0.491432
1980.61	16.26	0.260882	0.260882	0.260882
1997.51	16.26	0.196796	0.196796	0.196796
2014.4	16.26	0.112246	0.112246	0.112246
2031.3	16.26	0.0614918	0.0614918	0.0614918
2048.13	16.26	0.0433024	0.0433024	0.0433024
2064.9	16.26	0.0506507	0.0506507	0.0506507
2081.61	16.26	0.027713	0.027713	0.027713
2098.45	16.26	0.037533	0.037533	0.037533
2115.29	16.26	0.0309427	0.0309427	0.0309427
2132.13	16.26	0.0175704	0.0175704	0.0175704
2148.97	16.26	0.0270088	0.0270088	0.0270088
2165.81	16.26	0.0357281	0.0357281	0.0357281
2182.64	16.26	0.0529143	0.0529143	0.0529143
2199.48	16.26	0.0439477	0.0439477	0.0439477
2216.32	16.26	0.0198984	0.0198984	0.0198984
2233.16	16.26	0.00732345	0.00732345	0.00732345
2250	16.26	0.00524168	0.00524168	0.00524168
2266.84	16.26	0.0069453	0.0069453	0.0069453
2283.67	16.26	0.00774946	0.00774946	0.00774946
2300.51	16.26	0.018112	0.018112	0.018112
2317.35	16.26	0.0341373	0.0341373	0.0341373
2334.19	16.26	0.0445985	0.0445985	0.0445985
2350.4	16.26	0.095892	0.095892	0.095892
2366.68	16.26	0.110245	0.110245	0.110245
2384.12	16.26	0.217426	0.217426	0.217426
2400.81	16.26	0.221045	0.221045	0.221045
2417.5	16.26	0.372839	0.372839	0.372839
2434.19	16.26	0.316779	0.316779	0.316779
2450.88	16.26	0.516809	0.516809	0.516809
2467.57	16.26	0.596793	0.596793	0.596793
2484.32	16.26	1.25273	1.25273	1.25273
2501.08	16.26	1.65084	1.65084	1.65084

## Sheet: k_ZY1F
Wavelength	FWHM	k_Summer_M	k_Winter_M	k_1976_M
1009.7	16.848	0.00911443	0.00911443	0.00911443
1026.55	16.846	0.00337197	0.00337197	0.00337197
1043.4	16.846	0.000288586	0.000288586	0.000288586
1060.24	16.849	0.000425918	0.000425918	0.000425918
1077.09	16.845	0.0120361	0.0120361	0.0120361
1093.94	16.845	0.0668138	0.0668138	0.0668138
1110.78	16.848	0.233302	0.233302	0.233302
1127.63	16.848	1.01621	1.01621	1.01621
1144.48	16.845	0.646669	0.646669	0.646669
1161.32	16.849	0.225221	0.225221	0.225221
1178.17	16.845	0.0983846	0.0983846	0.0983846
1195.02	16.848	0.0773875	0.0773875	0.0773875
1211.86	16.845	0.0769686	0.0769686	0.0769686
1228.71	16.848	0.0227801	0.0227801	0.0227801
1245.56	16.848	0.000962309	0.000962309	0.000962309
1262.4	16.846	0.00130806	0.00130806	0.00130806
1279.25	16.845	0.00847838	0.00847838	0.00847838
1296.09	16.849	0.0484546	0.0484546	0.0484546
1312.94	16.845	0.174307	0.174307	0.174307
1329.79	16.846	0.41036	0.41036	0.41036
1346.63	16.848	1.02631	1.02631	1.02631
1363.48	16.848	0.824287	0.824287	0.824287
1380.33	16.845	1.3229	1.3229	1.3229
1397.17	16.848	1.55367	1.55367	1.55367
1414.02	16.848	1.78799	1.78799	1.78799
1430.87	16.845	1.19671	1.19671	1.19671
1447.71	16.846	1.05509	1.05509	1.05509
1464.56	16.846	0.795974	0.795974	0.795974
1481.41	16.846	0.667417	0.667417	0.667417
1498.25	16.849	0.204068	0.204068	0.204068
1515.1	16.844	0.104952	0.104952	0.104952
1531.94	16.848	0.0290226	0.0290226	0.0290226
1548.79	16.848	0.0101897	0.0101897	0.0101897
1565.64	16.846	0.00608868	0.00608868	0.00608868
1582.49	16.845	0.00459149	0.00459149	0.00459149
1599.33	16.848	0.00458508	0.00458508	0.00458508
1616.18	16.846	0.00221866	0.00221866	0.00221866
1633.03	16.846	0.00183742	0.00183742	0.00183742
1649.87	16.848	0.00687252	0.00687252	0.00687252
1666.72	16.845	0.00832866	0.00832866	0.00832866
1683.56	16.849	0.00748714	0.00748714	0.00748714
1700.41	16.845	0.0227953	0.0227953	0.0227953
1717.26	16.846	0.0366529	0.0366529	0.0366529
1734.1	16.849	0.0693545	0.0693545	0.0693545
1750.95	16.845	0.102556	0.102556	0.102556
1767.8	16.845	0.17139	0.17139	0.17139
1784.64	16.849	0.385227	0.385227	0.385227
1801.49	16.845	0.968838	0.968838	0.968838
1818.34	16.846	2.33378	2.33378	2.33378
1835.18	16.849	1.21161	1.21161	1.21161
1852.03	16.846	1.36016	1.36016	1.36016
1868.88	16.845	1.52667	1.52667	1.52667
1885.72	16.848	2.27068	2.27068	2.27068
1902.57	16.845	1.89776	1.89776	1.89776
1919.41	16.848	2.49553	2.49553	2.49553
1936.26	16.849	1.87738	1.87738	1.87738
1953.11	16.845	1.04372	1.04372	1.04372
1969.96	16.845	0.346197	0.346197	0.346197
1986.8	16.846	0.227831	0.227831	0.227831
2003.65	16.846	0.149904	0.149904	0.149904
2020.49	16.848	0.107237	0.107237	0.107237
2037.34	16.846	0.0538883	0.0538883	0.0538883
2054.19	16.848	0.0389707	0.0389707	0.0389707
2071.03	16.845	0.0413283	0.0413283	0.0413283
2087.88	16.846	0.0230567	0.0230567	0.0230567
2104.73	16.846	0.0328226	0.0328226	0.0328226
2121.57	16.849	0.0321404	0.0321404	0.0321404
2138.42	16.845	0.00763731	0.00763731	0.00763731
2155.27	16.848	0.0407878	0.0407878	0.0407878
2172.11	16.846	0.0362207	0.0362207	0.0362207
2188.96	16.846	0.0530761	0.0530761	0.0530761
2205.81	16.845	0.035005	0.035005	0.035005
2222.65	16.85	0.0148495	0.0148495	0.0148495
2239.5	16.846	0.0063469	0.0063469	0.0063469
2256.35	16.845	0.00451516	0.00451516	0.00451516
2273.19	16.846	0.00664371	0.00664371	0.00664371
2290.04	16.848	0.0157368	0.0157368	0.0157368
2306.89	16.845	0.0149986	0.0149986	0.0149986
2323.73	16.848	0.0411248	0.0411248	0.0411248
2340.58	16.846	0.0660718	0.0660718	0.0660718
2357.43	16.848	0.0935215	0.0935215	0.0935215
2374.27	16.846	0.165238	0.165238	0.165238
2391.12	16.845	0.207609	0.207609	0.207609
2407.96	16.848	0.302244	0.302244	0.302244
2424.81	16.848	0.329882	0.329882	0.329882
2441.66	16.845	0.399451	0.399451	0.399451
2458.5	16.849	0.514496	0.514496	0.514496
2475.35	16.845	0.832766	0.832766	0.832766
2492.2	16.846	1.65662	1.65662	1.65662
2509.04	16.849	1.81719	1.81719	1.81719

## Sheet: k_GF5B
Wavelength	FWHM	k_Summer_M	k_Winter_M	k_1976_M
1009	8.546	0.00792766	0.00792766	0.00792766
1017.42	8.546	0.00441585	0.00441585	0.00441585
1025.83	8.546	0.00495588	0.00495588	0.00495588
1034.25	8.546	0.000662304	0.000662304	0.000662304
1042.67	8.546	0.000254123	0.000254123	0.000254123
1051.08	8.546	0.000115494	0.000115494	0.000115494
1059.5	8.546	0.000402955	0.000402955	0.000402955
1067.92	8.546	0.00310146	0.00310146	0.00310146
1076.33	8.546	0.0115066	0.0115066	0.0115066
1084.75	8.546	0.0292797	0.0292797	0.0292797
1093.17	8.546	0.0569483	0.0569483	0.0569483
1101.58	8.546	0.137403	0.137403	0.137403
1110	8.546	0.228057	0.228057	0.228057
1118.42	8.546	0.69678	0.69678	0.69678
1126.83	8.546	0.886455	0.886455	0.886455
1135.25	8.546	0.691888	0.691888	0.691888
1143.67	8.546	0.63724	0.63724	0.63724
1152.08	8.546	0.522477	0.522477	0.522477
1160.5	8.546	0.246547	0.246547	0.246547
1168.92	8.546	0.13511	0.13511	0.13511
1177.33	8.546	0.105519	0.105519	0.105519
1185.75	8.546	0.121485	0.121485	0.121485
1194.17	8.546	0.0800604	0.0800604	0.0800604
1202.58	8.546	0.0930398	0.0930398	0.0930398
1211	8.546	0.077118	0.077118	0.077118
1219.42	8.546	0.0438296	0.0438296	0.0438296
1227.83	8.546	0.0261933	0.0261933	0.0261933
1236.25	8.546	0.00684245	0.00684245	0.00684245
1244.67	8.546	0.00127677	0.00127677	0.00127677
1253.08	8.546	0.000660176	0.000660176	0.000660176
1261.5	8.546	0.00102735	0.00102735	0.00102735
1269.92	8.546	0.00349215	0.00349215	0.00349215
1278.33	8.546	0.00732346	0.00732346	0.00732346
1286.75	8.546	0.015314	0.015314	0.015314
1295.17	8.546	0.0455931	0.0455931	0.0455931
1303.58	8.546	0.0915683	0.0915683	0.0915683
1312	8.546	0.156844	0.156844	0.156844
1320.42	8.546	0.208624	0.208624	0.208624
1328.83	8.546	0.361392	0.361392	0.361392
1337.25	8.546	0.458766	0.458766	0.458766
1345.66	8.546	0.828676	0.828676	0.828676
1354.08	8.546	1.62587	1.62587	1.62587
1362.5	8.546	0.804565	0.804565	0.804565
1370.91	8.546	1.03516	1.03516	1.03516
1379.33	8.546	1.37729	1.37729	1.37729
1387.75	8.546	1.45692	1.45692	1.45692
1396.16	8.546	1.5526	1.5526	1.5526
1404.58	8.546	1.76996	1.76996	1.76996
1413	8.546	1.79275	1.79275	1.79275
1421.41	8.546	1.57967	1.57967	1.57967
1429.83	8.546	1.2037	1.2037	1.2037
1438.25	8.546	1.30398	1.30398	1.30398
1446.66	8.546	1.0806	1.0806	1.0806
1455.08	8.546	0.776268	0.776268	0.776268
1463.5	8.546	0.749299	0.749299	0.749299
1471.91	8.546	0.904894	0.904894	0.904894
1480.33	8.546	0.694008	0.694008	0.694008
1488.75	8.546	0.462314	0.462314	0.462314
1497.16	8.546	0.23335	0.23335	0.23335
1505.58	8.546	0.15395	0.15395	0.15395
1514	8.546	0.10629	0.10629	0.10629
1522.41	8.546	0.0606487	0.0606487	0.0606487
1530.83	8.546	0.0343661	0.0343661	0.0343661
1539.25	8.546	0.0156464	0.0156464	0.0156464
1547.66	8.546	0.010394	0.010394	0.010394
1556.08	8.546	0.00492194	0.00492194	0.00492194
1564.5	8.546	0.00586035	0.00586035	0.00586035
1572.91	8.546	0.00397009	0.00397009	0.00397009
1581.33	8.546	0.00412575	0.00412575	0.00412575
1589.75	8.546	0.00489712	0.00489712	0.00489712
1598.16	8.546	0.00456913	0.00456913	0.00456913
1606.58	8.546	0.00201687	0.00201687	0.00201687
1615	8.546	0.00241864	0.00241864	0.00241864
1623.41	8.546	0.00107199	0.00107199	0.00107199
1631.83	8.546	0.00198878	0.00198878	0.00198878
1640.25	8.546	0.00341915	0.00341915	0.00341915
1648.66	8.546	0.00579451	0.00579451	0.00579451
1657.08	8.546	0.00814654	0.00814654	0.00814654
1665.5	8.546	0.00764216	0.00764216	0.00764216
1673.91	8.546	0.00789152	0.00789152	0.00789152
1682.33	8.546	0.00839035	0.00839035	0.00839035
1690.75	8.546	0.0181315	0.0181315	0.0181315
1699.16	8.546	0.0240645	0.0240645	0.0240645
1707.58	8.546	0.0350012	0.0350012	0.0350012
1716	8.546	0.0378753	0.0378753	0.0378753
1724.41	8.546	0.0604235	0.0604235	0.0604235
1732.83	8.546	0.066789	0.066789	0.066789
1741.25	8.546	0.0878595	0.0878595	0.0878595
1749.66	8.546	0.0967821	0.0967821	0.0967821
1758.08	8.546	0.11198	0.11198	0.11198
1766.5	8.546	0.168823	0.168823	0.168823
1774.91	8.546	0.253379	0.253379	0.253379
1783.33	8.546	0.373857	0.373857	0.373857
1791.75	8.546	0.555111	0.555111	0.555111
1800.16	8.546	0.915257	0.915257	0.915257
1808.58	8.546	1.56661	1.56661	1.56661
1817	8.546	2.19929	2.19929	2.19929
1825.41	8.546	2.36059	2.36059	2.36059
1833.83	8.546	1.45104	1.45104	1.45104
1842.25	8.546	1.38459	1.38459	1.38459
1850.66	8.546	1.42558	1.42558	1.42558
1859.08	8.546	1.52855	1.52855	1.52855
1867.5	8.546	1.56479	1.56479	1.56479
1875.91	8.546	1.65101	1.65101	1.65101
1884.33	8.546	2.25376	2.25376	2.25376
1892.75	8.546	2.25413	2.25413	2.25413
1901.16	8.546	1.76176	1.76176	1.76176
1909.58	8.546	1.79012	1.79012	1.79012
1918	8.546	2.44386	2.44386	2.44386
1926.41	8.546	2.50985	2.50985	2.50985
1934.83	8.546	2.11492	2.11492	2.11492
1943.25	8.546	1.50424	1.50424	1.50424
1951.66	8.546	1.06609	1.06609	1.06609
1960.08	8.546	0.758392	0.758392	0.758392
1968.5	8.546	0.354576	0.354576	0.354576
1976.91	8.546	0.290561	0.290561	0.290561
1985.33	8.546	0.231337	0.231337	0.231337
1993.75	8.546	0.198465	0.198465	0.198465
2002.16	8.546	0.167151	0.167151	0.167151
2010.58	8.546	0.0839869	0.0839869	0.0839869
2019	8.546	0.121938	0.121938	0.121938
2027.41	8.546	0.0791709	0.0791709	0.0791709
2035.83	8.546	0.0494323	0.0494323	0.0494323
2044.25	8.546	0.0499075	0.0499075	0.0499075
2052.66	8.546	0.0354456	0.0354456	0.0354456
2061.08	8.546	0.0549004	0.0549004	0.0549004
2069.49	8.546	0.0416909	0.0416909	0.0416909
2077.91	8.546	0.0325445	0.0325445	0.0325445
2086.33	8.546	0.0236798	0.0236798	0.0236798
2094.74	8.546	0.0333465	0.0333465	0.0333465
2103.16	8.546	0.0358788	0.0358788	0.0358788
2111.58	8.546	0.0262583	0.0262583	0.0262583
2119.99	8.546	0.0357816	0.0357816	0.0357816
2128.41	8.546	0.0240917	0.0240917	0.0240917
2136.83	8.546	0.0103688	0.0103688	0.0103688
2145.24	8.546	0.0127462	0.0127462	0.0127462
2153.66	8.546	0.0443746	0.0443746	0.0443746
2162.08	8.546	0.039427	0.039427	0.039427
2170.49	8.546	0.0325285	0.0325285	0.0325285
2178.91	8.546	0.04309	0.04309	0.04309
2187.33	8.546	0.0588959	0.0588959	0.0588959
2195.74	8.546	0.0490139	0.0490139	0.0490139
2204.16	8.546	0.0374879	0.0374879	0.0374879
2212.58	8.546	0.0219279	0.0219279	0.0219279
2220.99	8.546	0.0150734	0.0150734	0.0150734
2229.41	8.546	0.00770147	0.00770147	0.00770147
2237.83	8.546	0.0064238	0.0064238	0.0064238
2246.24	8.546	0.00662452	0.00662452	0.00662452
2254.66	8.546	0.0041735	0.0041735	0.0041735
2263.08	8.546	0.00575735	0.00575735	0.00575735
2271.49	8.546	0.00735056	0.00735056	0.00735056
2279.91	8.546	0.00516109	0.00516109	0.00516109
2288.33	8.546	0.0126164	0.0126164	0.0126164
2296.74	8.546	0.0225551	0.0225551	0.0225551
2305.16	8.546	0.0137161	0.0137161	0.0137161
2313.58	8.546	0.0208653	0.0208653	0.0208653
2321.99	8.546	0.052211	0.052211	0.052211
2330.41	8.546	0.0329666	0.0329666	0.0329666
2338.83	8.546	0.0615452	0.0615452	0.0615452
2347.24	8.546	0.0893844	0.0893844	0.0893844
2355.66	8.546	0.0958895	0.0958895	0.0958895
2364.08	8.546	0.0936243	0.0936243	0.0936243
2372.49	8.546	0.143407	0.143407	0.143407
2380.91	8.546	0.225394	0.225394	0.225394
2389.33	8.546	0.21666	0.21666	0.21666
2397.74	8.546	0.190924	0.190924	0.190924
2406.16	8.546	0.278922	0.278922	0.278922
2414.58	8.546	0.403499	0.403499	0.403499
2422.99	8.546	0.329152	0.329152	0.329152
2431.41	8.546	0.296802	0.296802	0.296802
2439.83	8.546	0.326723	0.326723	0.326723
2448.24	8.546	0.620531	0.620531	0.620531
2456.66	8.546	0.463291	0.463291	0.463291
2465.08	8.546	0.560429	0.560429	0.560429
2473.49	8.546	0.799533	0.799533	0.799533
2481.91	8.546	1.21975	1.21975	1.21975
2490.33	8.546	1.76869	1.76869	1.76869
2498.74	8.546	1.5282	1.5282	1.5282
2507.16	8.546	1.87016	1.87016	1.87016
2515.58	8.546	2.538	2.538	2.538

## Sheet: k_GF5A
Wavelength	FWHM	k_Summer_M	k_Winter_M	k_1976_M
1014.15	8.25	0.00397606	0.00397606	0.00397606
1022.56	8.25	0.00494986	0.00494986	0.00494986
1030.98	8.25	0.00146572	0.00146572	0.00146572
1039.4	8.25	0.0003349	0.0003349	0.0003349
1047.81	8.25	0.000123463	0.000123463	0.000123463
1056.23	8.25	0.000155258	0.000155258	0.000155258
1064.65	8.25	0.00139305	0.00139305	0.00139305
1073.06	8.25	0.00751367	0.00751367	0.00751367
1081.48	8.25	0.0200848	0.0200848	0.0200848
1089.9	8.25	0.0385381	0.0385381	0.0385381
1098.31	8.25	0.0996533	0.0996533	0.0996533
1106.73	8.25	0.182577	0.182577	0.182577
1115.15	8.25	0.44954	0.44954	0.44954
1123.56	8.25	0.853076	0.853076	0.853076
1131.98	8.25	0.753549	0.753549	0.753549
1140.4	8.25	0.512949	0.512949	0.512949
1148.81	8.25	0.631718	0.631718	0.631718
1157.23	8.25	0.351937	0.351937	0.351937
1165.65	8.25	0.164893	0.164893	0.164893
1174.06	8.25	0.114438	0.114438	0.114438
1182.48	8.25	0.115728	0.115728	0.115728
1190.9	8.25	0.0951496	0.0951496	0.0951496
1199.31	8.25	0.0979927	0.0979927	0.0979927
1207.73	8.25	0.0720129	0.0720129	0.0720129
1216.15	8.25	0.0597455	0.0597455	0.0597455
1224.56	8.25	0.0364033	0.0364033	0.0364033
1232.98	8.25	0.0120123	0.0120123	0.0120123
1241.4	8.25	0.00193732	0.00193732	0.00193732
1249.81	8.25	0.000833414	0.000833414	0.000833414
1258.23	8.25	0.000698425	0.000698425	0.000698425
1266.65	8.25	0.00244958	0.00244958	0.00244958
1275.06	8.25	0.00546405	0.00546405	0.00546405
1283.48	8.25	0.0101912	0.0101912	0.0101912
1291.9	8.25	0.0322247	0.0322247	0.0322247
1300.31	8.25	0.0734923	0.0734923	0.0734923
1308.73	8.25	0.128602	0.128602	0.128602
1317.15	8.25	0.189091	0.189091	0.189091
1325.56	8.25	0.26678	0.26678	0.26678
1333.98	8.25	0.464366	0.464366	0.464366
1342.4	8.25	0.606859	0.606859	0.606859
1350.81	8.25	1.50431	1.50431	1.50431
1359.23	8.25	0.951055	0.951055	0.951055
1367.65	8.25	0.813839	0.813839	0.813839
1376.06	8.25	1.4216	1.4216	1.4216
1384.48	8.25	1.1481	1.1481	1.1481
1392.9	8.25	1.5827	1.5827	1.5827
1401.31	8.25	1.73073	1.73073	1.73073
1409.73	8.25	1.81954	1.81954	1.81954
1418.15	8.25	1.7258	1.7258	1.7258
1426.56	8.25	1.31518	1.31518	1.31518
1434.98	8.25	1.24746	1.24746	1.24746
1443.4	8.25	1.17449	1.17449	1.17449
1451.81	8.25	0.898349	0.898349	0.898349
1460.23	8.25	0.704543	0.704543	0.704543
1468.65	8.25	0.912491	0.912491	0.912491
1477.06	8.25	0.752387	0.752387	0.752387
1485.48	8.25	0.582955	0.582955	0.582955
1493.9	8.25	0.308018	0.308018	0.308018
1502.31	8.25	0.177543	0.177543	0.177543
1510.73	8.25	0.114459	0.114459	0.114459
1519.15	8.25	0.0814438	0.0814438	0.0814438
1527.56	8.25	0.04396	0.04396	0.04396
1535.98	8.25	0.0196994	0.0196994	0.0196994
1544.4	8.25	0.0129798	0.0129798	0.0129798
1552.81	8.25	0.00662869	0.00662869	0.00662869
1561.23	8.25	0.00523493	0.00523493	0.00523493
1569.65	8.25	0.00480761	0.00480761	0.00480761
1578.06	8.25	0.00387495	0.00387495	0.00387495
1586.48	8.25	0.00442182	0.00442182	0.00442182
1594.9	8.25	0.00535436	0.00535436	0.00535436
1603.31	8.25	0.00250456	0.00250456	0.00250456
1611.73	8.25	0.00230999	0.00230999	0.00230999
1620.15	8.25	0.00171778	0.00171778	0.00171778
1628.56	8.25	0.00121104	0.00121104	0.00121104
1636.98	8.25	0.00283487	0.00283487	0.00283487
1645.4	8.25	0.0045919	0.0045919	0.0045919
1653.81	8.25	0.00797254	0.00797254	0.00797254
1662.23	8.25	0.00836137	0.00836137	0.00836137
1670.65	8.25	0.0069871	0.0069871	0.0069871
1679.06	8.25	0.00838988	0.00838988	0.00838988
1687.48	8.25	0.0130796	0.0130796	0.0130796
1695.9	8.25	0.0229963	0.0229963	0.0229963
1704.31	8.25	0.0279152	0.0279152	0.0279152
1712.73	8.25	0.0376726	0.0376726	0.0376726
1721.15	8.25	0.0512575	0.0512575	0.0512575
1729.56	8.25	0.0597654	0.0597654	0.0597654
1737.98	8.25	0.0802233	0.0802233	0.0802233
1746.4	8.25	0.099242	0.099242	0.099242
1754.81	8.25	0.102703	0.102703	0.102703
1763.23	8.25	0.143105	0.143105	0.143105
1771.65	8.25	0.207147	0.207147	0.207147
1780.06	8.25	0.326213	0.326213	0.326213
1788.48	8.25	0.44789	0.44789	0.44789
1796.9	8.25	0.782614	0.782614	0.782614
1805.31	8.25	1.33146	1.33146	1.33146
1813.73	8.25	1.98107	1.98107	1.98107
1822.15	8.25	2.40711	2.40711	2.40711
1830.56	8.25	1.87009	1.87009	1.87009
1838.98	8.25	1.16632	1.16632	1.16632
1847.4	8.25	1.50133	1.50133	1.50133
1855.82	8.25	1.37671	1.37671	1.37671
1864.23	8.25	1.70145	1.70145	1.70145
1872.65	8.25	1.19199	1.19199	1.19199
1881.07	8.25	2.13825	2.13825	2.13825
1889.48	8.25	2.3076	2.3076	2.3076
1897.9	8.25	2.1053	2.1053	2.1053
1906.32	8.25	1.64656	1.64656	1.64656
1914.73	8.25	2.17719	2.17719	2.17719
1923.15	8.25	2.56274	2.56274	2.56274
1931.57	8.25	2.2751	2.2751	2.2751
1939.98	8.25	1.71793	1.71793	1.71793
1948.4	8.25	1.21858	1.21858	1.21858
1956.82	8.25	0.914035	0.914035	0.914035
1965.23	8.25	0.449863	0.449863	0.449863
1973.65	8.25	0.319592	0.319592	0.319592
1982.07	8.25	0.249521	0.249521	0.249521
1990.48	8.25	0.212715	0.212715	0.212715
1998.9	8.25	0.18563	0.18563	0.18563
2007.32	8.25	0.0927739	0.0927739	0.0927739
2015.73	8.25	0.137825	0.137825	0.137825
2024.15	8.25	0.0837454	0.0837454	0.0837454
2032.57	8.25	0.0614249	0.0614249	0.0614249
2040.98	8.25	0.0554414	0.0554414	0.0554414
2049.4	8.25	0.0315733	0.0315733	0.0315733
2057.82	8.25	0.0506606	0.0506606	0.0506606
2066.23	8.25	0.04794	0.04794	0.04794
2074.65	8.25	0.0347366	0.0347366	0.0347366
2083.07	8.25	0.0261099	0.0261099	0.0261099
2091.48	8.25	0.0263588	0.0263588	0.0263588
2099.9	8.25	0.0444913	0.0444913	0.0444913
2108.32	8.25	0.0227414	0.0227414	0.0227414
2116.73	8.25	0.0334526	0.0334526	0.0334526
2125.15	8.25	0.0324128	0.0324128	0.0324128
2133.57	8.25	0.0118757	0.0118757	0.0118757
2141.98	8.25	0.00721231	0.00721231	0.00721231
2150.4	8.25	0.0391974	0.0391974	0.0391974
2158.82	8.25	0.0363889	0.0363889	0.0363889
2167.23	8.25	0.0349308	0.0349308	0.0349308
2175.65	8.25	0.0390269	0.0390269	0.0390269
2184.07	8.25	0.0611443	0.0611443	0.0611443
2192.48	8.25	0.043031	0.043031	0.043031
2200.9	8.25	0.0457599	0.0457599	0.0457599
2209.32	8.25	0.025189	0.025189	0.025189
2217.73	8.25	0.0190892	0.0190892	0.0190892
2226.15	8.25	0.0122387	0.0122387	0.0122387
2234.57	8.25	0.0064473	0.0064473	0.0064473
2242.98	8.25	0.00654945	0.00654945	0.00654945
2251.4	8.25	0.0044255	0.0044255	0.0044255
2259.82	8.25	0.00459782	0.00459782	0.00459782
2268.23	8.25	0.00892069	0.00892069	0.00892069
2276.65	8.25	0.00460531	0.00460531	0.00460531
2285.07	8.25	0.00772723	0.00772723	0.00772723
2293.48	8.25	0.0242476	0.0242476	0.0242476
2301.9	8.25	0.0137812	0.0137812	0.0137812
2310.32	8.25	0.0174573	0.0174573	0.0174573
2318.73	8.25	0.0389315	0.0389315	0.0389315
2327.15	8.25	0.0388159	0.0388159	0.0388159
2335.57	8.25	0.0410173	0.0410173	0.0410173
2343.98	8.25	0.0780853	0.0780853	0.0780853
2352.4	8.25	0.114797	0.114797	0.114797
2360.82	8.25	0.079582	0.079582	0.079582
2369.23	8.25	0.129971	0.129971	0.129971
2377.65	8.25	0.188764	0.188764	0.188764
2386.07	8.25	0.243448	0.243448	0.243448
2394.48	8.25	0.19126	0.19126	0.19126
2402.9	8.25	0.219918	0.219918	0.219918
2411.32	8.25	0.351906	0.351906	0.351906
2419.73	8.25	0.398256	0.398256	0.398256
2428.15	8.25	0.269844	0.269844	0.269844
2436.57	8.25	0.353928	0.353928	0.353928
2444.98	8.25	0.46335	0.46335	0.46335
2453.4	8.25	0.575984	0.575984	0.575984
2461.82	8.25	0.482686	0.482686	0.482686
2470.23	8.25	0.711939	0.711939	0.711939
2478.65	8.25	0.968096	0.968096	0.968096
2487.07	8.25	1.66057	1.66057	1.66057
2495.48	8.25	1.62517	1.62517	1.62517
2503.9	8.25	1.67326	1.67326	1.67326
2512.32	8.25	2.23705	2.23705	2.23705
2520.73	8.25	2.92922	2.92922	2.92922

## Sheet: k_GF5
Wavelength	FWHM	k_Summer_M	k_Winter_M	k_1976_M
1004.77	7.67828	0.00742653	0.00742653	0.00742653
1013.2	7.68189	0.00442439	0.00442439	0.00442439
1021.62	7.68551	0.00543558	0.00543558	0.00543558
1030.05	7.68912	0.00219652	0.00219652	0.00219652
1038.48	7.69273	0.000383738	0.000383738	0.000383738
1046.91	7.69634	0.000125316	0.000125316	0.000125316
1055.33	7.69995	0.000140914	0.000140914	0.000140914
1063.76	7.70356	0.00108882	0.00108882	0.00108882
1072.19	7.70718	0.00741487	0.00741487	0.00741487
1080.62	7.71079	0.0206801	0.0206801	0.0206801
1089.04	7.7144	0.0366692	0.0366692	0.0366692
1097.47	7.71801	0.0924435	0.0924435	0.0924435
1105.9	7.72162	0.180802	0.180802	0.180802
1114.32	7.72523	0.401032	0.401032	0.401032
1122.75	7.72885	0.865278	0.865278	0.865278
1131.18	7.73246	0.758878	0.758878	0.758878
1139.61	7.73607	0.516286	0.516286	0.516286
1148.03	7.73968	0.653254	0.653254	0.653254
1156.46	7.74329	0.378127	0.378127	0.378127
1164.89	7.7469	0.175574	0.175574	0.175574
1173.32	7.75052	0.109918	0.109918	0.109918
1181.74	7.75413	0.122689	0.122689	0.122689
1190.17	7.75774	0.0981403	0.0981403	0.0981403
1198.6	7.76135	0.0954835	0.0954835	0.0954835
1206.8	7.3271	0.0704825	0.0704825	0.0704825
1215.2	7.76857	0.0662775	0.0662775	0.0662775
1223.6	8.1949	0.0390123	0.0390123	0.0390123
1232.34	8.48475	0.0130102	0.0130102	0.0130102
1240.76	8.26	0.00249431	0.00249431	0.00249431
1249.21	7.78302	0.000823674	0.000823674	0.000823674
1257.66	7.78663	0.000568051	0.000568051	0.000568051
1266.1	7.79024	0.00196244	0.00196244	0.00196244
1274.55	7.79386	0.00476546	0.00476546	0.00476546
1283	7.79747	0.00885557	0.00885557	0.00885557
1291.45	7.80108	0.030587	0.030587	0.030587
1299.9	7.80469	0.0713507	0.0713507	0.0713507
1308.34	7.8083	0.125417	0.125417	0.125417
1316.79	7.81191	0.184679	0.184679	0.184679
1325.24	7.81553	0.260835	0.260835	0.260835
1333.69	7.81914	0.463933	0.463933	0.463933
1342.14	7.82275	0.587811	0.587811	0.587811
1350.58	7.82636	1.46003	1.46003	1.46003
1359.03	7.82997	0.974248	0.974248	0.974248
1367.48	7.83358	0.811403	0.811403	0.811403
1375.93	7.8372	1.42272	1.42272	1.42272
1384.37	7.84081	1.10457	1.10457	1.10457
1392.82	7.84442	1.5734	1.5734	1.5734
1401.27	7.84803	1.73109	1.73109	1.73109
1409.72	7.85164	1.82123	1.82123	1.82123
1418.17	7.85525	1.72885	1.72885	1.72885
1426.61	7.85887	1.31641	1.31641	1.31641
1435.06	7.86248	1.2559	1.2559	1.2559
1443.51	7.86609	1.179	1.179	1.179
1451.96	7.8697	0.888747	0.888747	0.888747
1460.4	7.87331	0.707535	0.707535	0.707535
1468.85	7.87692	0.926765	0.926765	0.926765
1477.3	7.88054	0.748662	0.748662	0.748662
1485.75	7.88415	0.577799	0.577799	0.577799
1494.2	7.88776	0.303066	0.303066	0.303066
1502.64	7.89137	0.175946	0.175946	0.175946
1511.09	7.89498	0.112175	0.112175	0.112175
1519.54	7.89859	0.078136	0.078136	0.078136
1527.99	7.90221	0.0440059	0.0440059	0.0440059
1536.43	7.90582	0.0186778	0.0186778	0.0186778
1544.88	7.90943	0.01268	0.01268	0.01268
1553.33	6.6598	0.00647437	0.00647437	0.00647437
1560.93	8.4042	0.00515695	0.00515695	0.00515695
1569.23	7.8809	0.00494677	0.00494677	0.00494677
1577.61	7.45885	0.00387228	0.00387228	0.00387228
1586.31	7.4983	0.00445341	0.00445341	0.00445341
1594.96	7.7622	0.00541318	0.00541318	0.00541318
1603.38	7.93471	0.00246961	0.00246961	0.00246961
1611.79	7.93832	0.00232748	0.00232748	0.00232748
1620.21	7.94194	0.00171711	0.00171711	0.00171711
1628.63	7.94555	0.0011895	0.0011895	0.0011895
1637.05	7.94916	0.00283948	0.00283948	0.00283948
1645.47	7.95277	0.00466435	0.00466435	0.00466435
1653.89	7.95638	0.0080788	0.0080788	0.0080788
1662.31	7.95999	0.00841607	0.00841607	0.00841607
1670.73	7.96361	0.00697022	0.00697022	0.00697022
1679.15	7.96722	0.00831764	0.00831764	0.00831764
1687.57	7.97083	0.0130623	0.0130623	0.0130623
1695.99	7.97444	0.023192	0.023192	0.023192
1704.41	7.97805	0.0277464	0.0277464	0.0277464
1712.83	7.98166	0.0376788	0.0376788	0.0376788
1721.25	7.98528	0.0513257	0.0513257	0.0513257
1729.67	7.98889	0.059655	0.059655	0.059655
1738.08	7.9925	0.0811401	0.0811401	0.0811401
1746.5	7.99611	0.0998169	0.0998169	0.0998169
1754.92	7.99972	0.103841	0.103841	0.103841
1763.34	8.00333	0.143075	0.143075	0.143075
1771.76	8.00695	0.206241	0.206241	0.206241
1780.18	8.01056	0.329554	0.329554	0.329554
1788.6	8.01417	0.44594	0.44594	0.44594
1797.02	8.01778	0.784955	0.784955	0.784955
1805.44	8.02139	1.33903	1.33903	1.33903
1813.86	8.025	1.99125	1.99125	1.99125
1822.28	8.02862	2.41084	2.41084	2.41084
1830.7	8.03223	1.80603	1.80603	1.80603
1839.12	8.03584	1.16398	1.16398	1.16398
1847.54	8.03945	1.50325	1.50325	1.50325
1855.96	8.04306	1.37034	1.37034	1.37034
1864.38	8.04667	1.70708	1.70708	1.70708
1872.79	8.05029	1.16279	1.16279	1.16279
1881.21	8.0539	2.13904	2.13904	2.13904
1889.63	8.05751	2.30895	2.30895	2.30895
1898.05	8.06112	2.10876	2.10876	2.10876
1906.47	8.06473	1.6659	1.6659	1.6659
1914.89	8.06834	2.21224	2.21224	2.21224
1923.31	8.07196	2.56451	2.56451	2.56451
1931.73	8.07557	2.27652	2.27652	2.27652
1940.15	8.07918	1.6868	1.6868	1.6868
1948.57	8.08279	1.21892	1.21892	1.21892
1956.99	8.0864	0.916985	0.916985	0.916985
1965.41	8.09001	0.450033	0.450033	0.450033
1973.83	8.09363	0.317386	0.317386	0.317386
1982.25	8.09724	0.249439	0.249439	0.249439
1990.67	8.10085	0.210586	0.210586	0.210586
1999.09	8.10446	0.183906	0.183906	0.183906
2007.5	8.10807	0.087884	0.087884	0.087884
2015.92	8.11168	0.139021	0.139021	0.139021
2024.34	8.1153	0.083505	0.083505	0.083505
2032.76	8.11891	0.05912	0.05912	0.05912
2041.18	8.12252	0.0560254	0.0560254	0.0560254
2049.6	8.12613	0.0312832	0.0312832	0.0312832
2058.02	8.12974	0.051736	0.051736	0.051736
2066.44	8.13335	0.0471235	0.0471235	0.0471235
2074.86	8.13697	0.0347166	0.0347166	0.0347166
2083.28	8.14058	0.0257226	0.0257226	0.0257226
2091.7	8.14419	0.0262977	0.0262977	0.0262977
2100.12	8.1478	0.0447534	0.0447534	0.0447534
2108.54	8.4804	0.023039	0.023039	0.023039
2116.97	8.023	0.0335115	0.0335115	0.0335115
2125.41	8.476	0.031646	0.031646	0.031646
2134.3	8.38695	0.0113396	0.0113396	0.0113396
2142.31	8.12115	0.00708966	0.00708966	0.00708966
2150.88	8.16947	0.0415257	0.0415257	0.0415257
2159.31	8.17308	0.0365269	0.0365269	0.0365269
2167.73	8.1767	0.0340859	0.0340859	0.0340859
2176.16	8.18031	0.0394408	0.0394408	0.0394408
2184.59	8.18392	0.0625778	0.0625778	0.0625778
2193.01	8.18753	0.0432233	0.0432233	0.0432233
2201.44	8.19114	0.0429789	0.0429789	0.0429789
2209.87	8.19475	0.024149	0.024149	0.024149
2218.3	8.19837	0.0183637	0.0183637	0.0183637
2226.72	8.20198	0.0116434	0.0116434	0.0116434
2235.15	8.20559	0.00654708	0.00654708	0.00654708
2243.58	8.2092	0.006678	0.006678	0.006678
2252.01	8.21281	0.00418013	0.00418013	0.00418013
2260.43	8.21642	0.00468229	0.00468229	0.00468229
2268.86	8.22004	0.00890193	0.00890193	0.00890193
2277.29	8.22365	0.00459551	0.00459551	0.00459551
2285.71	8.22726	0.00822207	0.00822207	0.00822207
2294.14	8.23087	0.0246798	0.0246798	0.0246798
2302.57	8.23448	0.0134562	0.0134562	0.0134562
2311	8.23809	0.0178437	0.0178437	0.0178437
2319.42	8.24171	0.0450266	0.0450266	0.0450266
2327.85	8.24532	0.0370509	0.0370509	0.0370509
2336.28	8.24893	0.0469067	0.0469067	0.0469067
2344.71	8.25254	0.0784788	0.0784788	0.0784788
2353.13	8.25615	0.113322	0.113322	0.113322
2361.56	8.25976	0.0823882	0.0823882	0.0823882
2369.99	8.26338	0.135506	0.135506	0.135506
2378.41	8.26699	0.202449	0.202449	0.202449
2386.84	8.2706	0.240139	0.240139	0.240139
2395.27	8.27421	0.190769	0.190769	0.190769
2403.7	8.27782	0.238322	0.238322	0.238322
2412.12	8.28143	0.361568	0.361568	0.361568
2420.55	8.28505	0.37358	0.37358	0.37358
2428.98	8.28866	0.270669	0.270669	0.270669
2437.41	8.29227	0.34636	0.34636	0.34636
2445.83	8.29588	0.496025	0.496025	0.496025
2454.26	8.29949	0.547662	0.547662	0.547662
2462.69	8.3031	0.498649	0.498649	0.498649
2471.11	8.30672	0.732253	0.732253	0.732253
2479.54	8.31033	1.00847	1.00847	1.00847
2487.97	8.31394	1.71507	1.71507	1.71507
2496.4	8.31755	1.59428	1.59428	1.59428
2504.82	8.32116	1.75678	1.75678	1.75678
2513.25	8.32477	2.29282	2.29282	2.29282
