# Supplementary material for: Towards global carbon transparency: Spaceborne imaging spectroscopy enables precise CO2 emission quantification at facility scale
Source: Research Square preprint supplement (doi:10.21203/rs.3.rs-5913782/v1), 2025-01-29
Supplement: Supplementary file 29 [file H2O_k_v3.xlsx]

## Sheet: k_ZY1E
Wavelength	FWHM	k_Summer_M	k_Winter_M	k_1976_M
1005.6	16.26	0.00758705	0.00758705	0.00758705
1022.21	16.26	0.00430294	0.00430294	0.00430294
1039.19	16.26	0.000396213	0.000396213	0.000396213
1055.87	16.26	0.000255811	0.000255811	0.000255811
1072.55	16.26	0.00826087	0.00826087	0.00826087
1089.23	16.26	0.0415461	0.0415461	0.0415461
1105.91	16.26	0.184206	0.184206	0.184206
1122.59	16.26	0.786684	0.786684	0.786684
1139.44	16.26	0.623847	0.623847	0.623847
1156.41	16.26	0.355166	0.355166	0.355166
1173.29	16.26	0.117614	0.117614	0.117614
1190.17	16.26	0.0972604	0.0972604	0.0972604
1207.04	16.26	0.0813784	0.0813784	0.0813784
1223.92	16.26	0.0336584	0.0336584	0.0336584
1240.8	16.26	0.00339456	0.00339456	0.00339456
1257.4	16.26	0.000852772	0.000852772	0.000852772
1274.15	16.26	0.00563918	0.00563918	0.00563918
1290.9	16.26	0.0308255	0.0308255	0.0308255
1307.65	16.26	0.125778	0.125778	0.125778
1324.4	16.26	0.266165	0.266165	0.266165
1341.16	16.26	0.562937	0.562937	0.562937
1357.91	16.26	1.38055	1.38055	1.38055
1374.87	16.26	1.26274	1.26274	1.26274
1391.65	16.26	1.53382	1.53382	1.53382
1408.49	16.26	1.78377	1.78377	1.78377
1425.33	16.26	1.33798	1.33798	1.33798
1442.17	16.26	1.17265	1.17265	1.17265
1459.01	16.26	0.745518	0.745518	0.745518
1475.85	16.26	0.783837	0.783837	0.783837
1492.7	16.26	0.335129	0.335129	0.335129
1509.54	16.26	0.130992	0.130992	0.130992
1526.38	16.26	0.0454462	0.0454462	0.0454462
1543.22	16.26	0.0131827	0.0131827	0.0131827
1560.06	16.26	0.00530649	0.00530649	0.00530649
1576.9	16.26	0.00387848	0.00387848	0.00387848
1593.71	16.26	0.00490025	0.00490025	0.00490025
1610.39	16.26	0.00200502	0.00200502	0.00200502
1627.13	16.26	0.00126424	0.00126424	0.00126424
1644.01	16.26	0.00431901	0.00431901	0.00431901
1660.89	16.26	0.00793573	0.00793573	0.00793573
1677.77	16.26	0.00799464	0.00799464	0.00799464
1694.65	16.26	0.0221673	0.0221673	0.0221673
1711.53	16.26	0.0363976	0.0363976	0.0363976
1728.41	16.26	0.0651386	0.0651386	0.0651386
1745.28	16.26	0.0909845	0.0909845	0.0909845
1762.16	16.26	0.141236	0.141236	0.141236
1778.85	16.26	0.303494	0.303494	0.303494
1795.43	16.26	0.636639	0.636639	0.636639
1812.02	16.26	1.68532	1.68532	1.68532
1828.82	16.26	2.19453	2.19453	2.19453
1845.62	16.26	1.42784	1.42784	1.42784
1862.42	16.26	1.58675	1.58675	1.58675
1880.13	16.26	2.0227	2.0227	2.0227
1896.11	16.26	2.09959	2.09959	2.09959
1912.97	16.26	2.15679	2.15679	2.15679
1929.93	16.26	2.33802	2.33802	2.33802
1946.82	16.26	1.26134	1.26134	1.26134
1963.72	16.26	0.489328	0.489328	0.489328
1980.61	16.26	0.258567	0.258567	0.258567
1997.51	16.26	0.19354	0.19354	0.19354
2014.4	16.26	0.111253	0.111253	0.111253
2031.3	16.26	0.0603721	0.0603721	0.0603721
2048.13	16.26	0.0450674	0.0450674	0.0450674
2064.9	16.26	0.0513689	0.0513689	0.0513689
2081.61	16.26	0.0277793	0.0277793	0.0277793
2098.45	16.26	0.0375849	0.0375849	0.0375849
2115.29	16.26	0.030741	0.030741	0.030741
2132.13	16.26	0.0195904	0.0195904	0.0195904
2148.97	16.26	0.0290019	0.0290019	0.0290019
2165.81	16.26	0.0350497	0.0350497	0.0350497
2182.64	16.26	0.0553986	0.0553986	0.0553986
2199.48	16.26	0.0441417	0.0441417	0.0441417
2216.32	16.26	0.0166745	0.0166745	0.0166745
2233.16	16.26	0.00727334	0.00727334	0.00727334
2250	16.26	0.00576628	0.00576628	0.00576628
2266.84	16.26	0.00708925	0.00708925	0.00708925
2283.67	16.26	0.00683601	0.00683601	0.00683601
2300.51	16.26	0.0170553	0.0170553	0.0170553
2317.35	16.26	0.0382023	0.0382023	0.0382023
2334.19	16.26	0.0458951	0.0458951	0.0458951
2350.4	16.26	0.0914749	0.0914749	0.0914749
2366.68	16.26	0.104468	0.104468	0.104468
2384.12	16.26	0.241719	0.241719	0.241719
2400.81	16.26	0.214516	0.214516	0.214516
2417.5	16.26	0.392656	0.392656	0.392656
2434.19	16.26	0.287994	0.287994	0.287994
2450.88	16.26	0.584569	0.584569	0.584569
2467.57	16.26	0.639793	0.639793	0.639793
2484.32	16.26	1.30506	1.30506	1.30506
2501.08	16.26	1.60748	1.60748	1.60748

## Sheet: k_ZY1F
Wavelength	FWHM	k_Summer_M	k_Winter_M	k_1976_M
1009.7	16.848	0.00658354	0.00658354	0.00658354
1026.55	16.846	0.00348004	0.00348004	0.00348004
1043.4	16.846	0.000239109	0.000239109	0.000239109
1060.24	16.849	0.000676418	0.000676418	0.000676418
1077.09	16.845	0.0142239	0.0142239	0.0142239
1093.94	16.845	0.0674136	0.0674136	0.0674136
1110.78	16.848	0.273024	0.273024	0.273024
1127.63	16.848	0.816218	0.816218	0.816218
1144.48	16.845	0.58092	0.58092	0.58092
1161.32	16.849	0.243891	0.243891	0.243891
1178.17	16.845	0.114335	0.114335	0.114335
1195.02	16.848	0.094831	0.094831	0.094831
1211.86	16.845	0.0666658	0.0666658	0.0666658
1228.71	16.848	0.0245478	0.0245478	0.0245478
1245.56	16.848	0.00132063	0.00132063	0.00132063
1262.4	16.846	0.00130264	0.00130264	0.00130264
1279.25	16.845	0.00723904	0.00723904	0.00723904
1296.09	16.849	0.0535062	0.0535062	0.0535062
1312.94	16.845	0.156096	0.156096	0.156096
1329.79	16.846	0.356362	0.356362	0.356362
1346.63	16.848	0.733337	0.733337	0.733337
1363.48	16.848	0.864547	0.864547	0.864547
1380.33	16.845	1.29407	1.29407	1.29407
1397.17	16.848	1.64805	1.64805	1.64805
1414.02	16.848	1.76162	1.76162	1.76162
1430.87	16.845	1.27089	1.27089	1.27089
1447.71	16.846	1.02084	1.02084	1.02084
1464.56	16.846	0.794636	0.794636	0.794636
1481.41	16.846	0.6734	0.6734	0.6734
1498.25	16.849	0.229327	0.229327	0.229327
1515.1	16.844	0.0968297	0.0968297	0.0968297
1531.94	16.848	0.0324479	0.0324479	0.0324479
1548.79	16.848	0.00988642	0.00988642	0.00988642
1565.64	16.846	0.00520939	0.00520939	0.00520939
1582.49	16.845	0.00419261	0.00419261	0.00419261
1599.33	16.848	0.00399274	0.00399274	0.00399274
1616.18	16.846	0.00209131	0.00209131	0.00209131
1633.03	16.846	0.00210921	0.00210921	0.00210921
1649.87	16.848	0.0066485	0.0066485	0.0066485
1666.72	16.845	0.00735251	0.00735251	0.00735251
1683.56	16.849	0.011325	0.011325	0.011325
1700.41	16.845	0.0257989	0.0257989	0.0257989
1717.26	16.846	0.0428867	0.0428867	0.0428867
1734.1	16.849	0.0693543	0.0693543	0.0693543
1750.95	16.845	0.102049	0.102049	0.102049
1767.8	16.845	0.173707	0.173707	0.173707
1784.64	16.849	0.379113	0.379113	0.379113
1801.49	16.845	0.991257	0.991257	0.991257
1818.34	16.846	2.26946	2.26946	2.26946
1835.18	16.849	1.32339	1.32339	1.32339
1852.03	16.846	1.42083	1.42083	1.42083
1868.88	16.845	1.50611	1.50611	1.50611
1885.72	16.848	2.23272	2.23272	2.23272
1902.57	16.845	1.94263	1.94263	1.94263
1919.41	16.848	2.47407	2.47407	2.47407
1936.26	16.849	1.87101	1.87101	1.87101
1953.11	16.845	1.04781	1.04781	1.04781
1969.96	16.845	0.34425	0.34425	0.34425
1986.8	16.846	0.22679	0.22679	0.22679
2003.65	16.846	0.146492	0.146492	0.146492
2020.49	16.848	0.104439	0.104439	0.104439
2037.34	16.846	0.0552259	0.0552259	0.0552259
2054.19	16.848	0.0379874	0.0379874	0.0379874
2071.03	16.845	0.0413668	0.0413668	0.0413668
2087.88	16.846	0.0243633	0.0243633	0.0243633
2104.73	16.846	0.0347782	0.0347782	0.0347782
2121.57	16.849	0.034218	0.034218	0.034218
2138.42	16.845	0.00776479	0.00776479	0.00776479
2155.27	16.848	0.0423655	0.0423655	0.0423655
2172.11	16.846	0.0333219	0.0333219	0.0333219
2188.96	16.846	0.0536329	0.0536329	0.0536329
2205.81	16.845	0.0309349	0.0309349	0.0309349
2222.65	16.85	0.0155567	0.0155567	0.0155567
2239.5	16.846	0.00705106	0.00705106	0.00705106
2256.35	16.845	0.00386386	0.00386386	0.00386386
2273.19	16.846	0.00687485	0.00687485	0.00687485
2290.04	16.848	0.0171407	0.0171407	0.0171407
2306.89	16.845	0.0147403	0.0147403	0.0147403
2323.73	16.848	0.0438203	0.0438203	0.0438203
2340.58	16.846	0.0590491	0.0590491	0.0590491
2357.43	16.848	0.0971005	0.0971005	0.0971005
2374.27	16.846	0.165362	0.165362	0.165362
2391.12	16.845	0.218462	0.218462	0.218462
2407.96	16.848	0.293247	0.293247	0.293247
2424.81	16.848	0.300065	0.300065	0.300065
2441.66	16.845	0.42025	0.42025	0.42025
2458.5	16.849	0.503166	0.503166	0.503166
2475.35	16.845	0.878305	0.878305	0.878305
2492.2	16.846	1.66777	1.66777	1.66777
2509.04	16.849	1.95879	1.95879	1.95879

## Sheet: k_GF5B
Wavelength	FWHM	k_Summer_M	k_Winter_M	k_1976_M
1009	8.546	0.00770483	0.00770483	0.00770483
1017.42	8.546	0.00391613	0.00391613	0.00391613
1025.83	8.546	0.00452336	0.00452336	0.00452336
1034.25	8.546	0.000701587	0.000701587	0.000701587
1042.67	8.546	0.000250485	0.000250485	0.000250485
1051.08	8.546	0.000127076	0.000127076	0.000127076
1059.5	8.546	0.000397989	0.000397989	0.000397989
1067.92	8.546	0.00310981	0.00310981	0.00310981
1076.33	8.546	0.012566	0.012566	0.012566
1084.75	8.546	0.0282609	0.0282609	0.0282609
1093.17	8.546	0.054633	0.054633	0.054633
1101.58	8.546	0.136935	0.136935	0.136935
1110	8.546	0.233015	0.233015	0.233015
1118.42	8.546	0.661315	0.661315	0.661315
1126.83	8.546	0.877125	0.877125	0.877125
1135.25	8.546	0.653739	0.653739	0.653739
1143.67	8.546	0.62359	0.62359	0.62359
1152.08	8.546	0.511321	0.511321	0.511321
1160.5	8.546	0.244222	0.244222	0.244222
1168.92	8.546	0.135638	0.135638	0.135638
1177.33	8.546	0.105519	0.105519	0.105519
1185.75	8.546	0.121485	0.121485	0.121485
1194.17	8.546	0.0799564	0.0799564	0.0799564
1202.58	8.546	0.0931009	0.0931009	0.0931009
1211	8.546	0.0764199	0.0764199	0.0764199
1219.42	8.546	0.0418627	0.0418627	0.0418627
1227.83	8.546	0.0261251	0.0261251	0.0261251
1236.25	8.546	0.00655743	0.00655743	0.00655743
1244.67	8.546	0.00134278	0.00134278	0.00134278
1253.08	8.546	0.000685684	0.000685684	0.000685684
1261.5	8.546	0.00109301	0.00109301	0.00109301
1269.92	8.546	0.00355572	0.00355572	0.00355572
1278.33	8.546	0.00747232	0.00747232	0.00747232
1286.75	8.546	0.0160729	0.0160729	0.0160729
1295.17	8.546	0.0462772	0.0462772	0.0462772
1303.58	8.546	0.0944294	0.0944294	0.0944294
1312	8.546	0.162035	0.162035	0.162035
1320.42	8.546	0.212005	0.212005	0.212005
1328.83	8.546	0.361406	0.361406	0.361406
1337.25	8.546	0.452769	0.452769	0.452769
1345.66	8.546	0.844846	0.844846	0.844846
1354.08	8.546	1.61277	1.61277	1.61277
1362.5	8.546	0.80369	0.80369	0.80369
1370.91	8.546	0.893309	0.893309	0.893309
1379.33	8.546	1.41812	1.41812	1.41812
1387.75	8.546	1.48744	1.48744	1.48744
1396.16	8.546	1.55557	1.55557	1.55557
1404.58	8.546	1.81184	1.81184	1.81184
1413	8.546	1.76509	1.76509	1.76509
1421.41	8.546	1.64023	1.64023	1.64023
1429.83	8.546	1.1542	1.1542	1.1542
1438.25	8.546	1.33365	1.33365	1.33365
1446.66	8.546	1.0499	1.0499	1.0499
1455.08	8.546	0.75608	0.75608	0.75608
1463.5	8.546	0.767153	0.767153	0.767153
1471.91	8.546	0.872933	0.872933	0.872933
1480.33	8.546	0.718319	0.718319	0.718319
1488.75	8.546	0.480761	0.480761	0.480761
1497.16	8.546	0.223788	0.223788	0.223788
1505.58	8.546	0.166964	0.166964	0.166964
1514	8.546	0.100714	0.100714	0.100714
1522.41	8.546	0.056572	0.056572	0.056572
1530.83	8.546	0.0332873	0.0332873	0.0332873
1539.25	8.546	0.0159993	0.0159993	0.0159993
1547.66	8.546	0.00989014	0.00989014	0.00989014
1556.08	8.546	0.00441489	0.00441489	0.00441489
1564.5	8.546	0.00624411	0.00624411	0.00624411
1572.91	8.546	0.00361778	0.00361778	0.00361778
1581.33	8.546	0.00395538	0.00395538	0.00395538
1589.75	8.546	0.0046546	0.0046546	0.0046546
1598.16	8.546	0.00515581	0.00515581	0.00515581
1606.58	8.546	0.00178573	0.00178573	0.00178573
1615	8.546	0.00254944	0.00254944	0.00254944
1623.41	8.546	0.000734232	0.000734232	0.000734232
1631.83	8.546	0.00209646	0.00209646	0.00209646
1640.25	8.546	0.00304045	0.00304045	0.00304045
1648.66	8.546	0.00601751	0.00601751	0.00601751
1657.08	8.546	0.00685366	0.00685366	0.00685366
1665.5	8.546	0.0084653	0.0084653	0.0084653
1673.91	8.546	0.00762454	0.00762454	0.00762454
1682.33	8.546	0.00751173	0.00751173	0.00751173
1690.75	8.546	0.0193386	0.0193386	0.0193386
1699.16	8.546	0.0253562	0.0253562	0.0253562
1707.58	8.546	0.0379934	0.0379934	0.0379934
1716	8.546	0.0341911	0.0341911	0.0341911
1724.41	8.546	0.0680739	0.0680739	0.0680739
1732.83	8.546	0.0733244	0.0733244	0.0733244
1741.25	8.546	0.0771726	0.0771726	0.0771726
1749.66	8.546	0.0982103	0.0982103	0.0982103
1758.08	8.546	0.109267	0.109267	0.109267
1766.5	8.546	0.184531	0.184531	0.184531
1774.91	8.546	0.256495	0.256495	0.256495
1783.33	8.546	0.385472	0.385472	0.385472
1791.75	8.546	0.529939	0.529939	0.529939
1800.16	8.546	0.902631	0.902631	0.902631
1808.58	8.546	1.53943	1.53943	1.53943
1817	8.546	2.27529	2.27529	2.27529
1825.41	8.546	2.41356	2.41356	2.41356
1833.83	8.546	1.35701	1.35701	1.35701
1842.25	8.546	1.45522	1.45522	1.45522
1850.66	8.546	1.3561	1.3561	1.3561
1859.08	8.546	1.52672	1.52672	1.52672
1867.5	8.546	1.54396	1.54396	1.54396
1875.91	8.546	1.61065	1.61065	1.61065
1884.33	8.546	2.29679	2.29679	2.29679
1892.75	8.546	2.19119	2.19119	2.19119
1901.16	8.546	1.2759	1.2759	1.2759
1909.58	8.546	1.79279	1.79279	1.79279
1918	8.546	2.4269	2.4269	2.4269
1926.41	8.546	2.57437	2.57437	2.57437
1934.83	8.546	2.21193	2.21193	2.21193
1943.25	8.546	1.48701	1.48701	1.48701
1951.66	8.546	1.02922	1.02922	1.02922
1960.08	8.546	0.840273	0.840273	0.840273
1968.5	8.546	0.334124	0.334124	0.334124
1976.91	8.546	0.298865	0.298865	0.298865
1985.33	8.546	0.21193	0.21193	0.21193
1993.75	8.546	0.199451	0.199451	0.199451
2002.16	8.546	0.16505	0.16505	0.16505
2010.58	8.546	0.0586882	0.0586882	0.0586882
2019	8.546	0.136658	0.136658	0.136658
2027.41	8.546	0.0834055	0.0834055	0.0834055
2035.83	8.546	0.0403405	0.0403405	0.0403405
2044.25	8.546	0.0550315	0.0550315	0.0550315
2052.66	8.546	0.0362203	0.0362203	0.0362203
2061.08	8.546	0.0573323	0.0573323	0.0573323
2069.49	8.546	0.0455083	0.0455083	0.0455083
2077.91	8.546	0.032774	0.032774	0.032774
2086.33	8.546	0.0242008	0.0242008	0.0242008
2094.74	8.546	0.0320355	0.0320355	0.0320355
2103.16	8.546	0.0357417	0.0357417	0.0357417
2111.58	8.546	0.0264264	0.0264264	0.0264264
2119.99	8.546	0.0346459	0.0346459	0.0346459
2128.41	8.546	0.0280314	0.0280314	0.0280314
2136.83	8.546	0.0117419	0.0117419	0.0117419
2145.24	8.546	0.0060084	0.0060084	0.0060084
2153.66	8.546	0.0505349	0.0505349	0.0505349
2162.08	8.546	0.0436768	0.0436768	0.0436768
2170.49	8.546	0.0305808	0.0305808	0.0305808
2178.91	8.546	0.037542	0.037542	0.037542
2187.33	8.546	0.072189	0.072189	0.072189
2195.74	8.546	0.0544656	0.0544656	0.0544656
2204.16	8.546	0.0365742	0.0365742	0.0365742
2212.58	8.546	0.0207665	0.0207665	0.0207665
2220.99	8.546	0.0125122	0.0125122	0.0125122
2229.41	8.546	0.00493976	0.00493976	0.00493976
2237.83	8.546	0.0068163	0.0068163	0.0068163
2246.24	8.546	0.00783553	0.00783553	0.00783553
2254.66	8.546	0.00419382	0.00419382	0.00419382
2263.08	8.546	0.00435546	0.00435546	0.00435546
2271.49	8.546	0.00816502	0.00816502	0.00816502
2279.91	8.546	0.00525478	0.00525478	0.00525478
2288.33	8.546	0.0118669	0.0118669	0.0118669
2296.74	8.546	0.0224857	0.0224857	0.0224857
2305.16	8.546	0.0130536	0.0130536	0.0130536
2313.58	8.546	0.0189309	0.0189309	0.0189309
2321.99	8.546	0.0629454	0.0629454	0.0629454
2330.41	8.546	0.0302723	0.0302723	0.0302723
2338.83	8.546	0.072045	0.072045	0.072045
2347.24	8.546	0.0734975	0.0734975	0.0734975
2355.66	8.546	0.100393	0.100393	0.100393
2364.08	8.546	0.0847245	0.0847245	0.0847245
2372.49	8.546	0.138291	0.138291	0.138291
2380.91	8.546	0.234548	0.234548	0.234548
2389.33	8.546	0.215434	0.215434	0.215434
2397.74	8.546	0.186222	0.186222	0.186222
2406.16	8.546	0.295467	0.295467	0.295467
2414.58	8.546	0.420213	0.420213	0.420213
2422.99	8.546	0.337424	0.337424	0.337424
2431.41	8.546	0.275739	0.275739	0.275739
2439.83	8.546	0.285752	0.285752	0.285752
2448.24	8.546	0.715271	0.715271	0.715271
2456.66	8.546	0.424947	0.424947	0.424947
2465.08	8.546	0.585768	0.585768	0.585768
2473.49	8.546	0.810075	0.810075	0.810075
2481.91	8.546	1.44488	1.44488	1.44488
2490.33	8.546	1.86442	1.86442	1.86442
2498.74	8.546	1.46493	1.46493	1.46493
2507.16	8.546	1.97524	1.97524	1.97524
2515.58	8.546	2.67692	2.67692	2.67692

## Sheet: k_GF5A
Wavelength	FWHM	k_Summer_M	k_Winter_M	k_1976_M
1014.15	8.25	0.00406374	0.00406374	0.00406374
1022.56	8.25	0.00503429	0.00503429	0.00503429
1030.98	8.25	0.00185126	0.00185126	0.00185126
1039.4	8.25	0.000357085	0.000357085	0.000357085
1047.81	8.25	0.000128232	0.000128232	0.000128232
1056.23	8.25	0.000148503	0.000148503	0.000148503
1064.65	8.25	0.00137991	0.00137991	0.00137991
1073.06	8.25	0.00744829	0.00744829	0.00744829
1081.48	8.25	0.0214479	0.0214479	0.0214479
1089.9	8.25	0.0408689	0.0408689	0.0408689
1098.31	8.25	0.100653	0.100653	0.100653
1106.73	8.25	0.18478	0.18478	0.18478
1115.15	8.25	0.448238	0.448238	0.448238
1123.56	8.25	0.852533	0.852533	0.852533
1131.98	8.25	0.759491	0.759491	0.759491
1140.4	8.25	0.517158	0.517158	0.517158
1148.81	8.25	0.632522	0.632522	0.632522
1157.23	8.25	0.351937	0.351937	0.351937
1165.65	8.25	0.164893	0.164893	0.164893
1174.06	8.25	0.115532	0.115532	0.115532
1182.48	8.25	0.117455	0.117455	0.117455
1190.9	8.25	0.0951611	0.0951611	0.0951611
1199.31	8.25	0.0965088	0.0965088	0.0965088
1207.73	8.25	0.0707887	0.0707887	0.0707887
1216.15	8.25	0.0583572	0.0583572	0.0583572
1224.56	8.25	0.0359963	0.0359963	0.0359963
1232.98	8.25	0.0124342	0.0124342	0.0124342
1241.4	8.25	0.00181076	0.00181076	0.00181076
1249.81	8.25	0.000852473	0.000852473	0.000852473
1258.23	8.25	0.000567411	0.000567411	0.000567411
1266.65	8.25	0.00214179	0.00214179	0.00214179
1275.06	8.25	0.00444536	0.00444536	0.00444536
1283.48	8.25	0.0086668	0.0086668	0.0086668
1291.9	8.25	0.0325798	0.0325798	0.0325798
1300.31	8.25	0.0750634	0.0750634	0.0750634
1308.73	8.25	0.118305	0.118305	0.118305
1317.15	8.25	0.189024	0.189024	0.189024
1325.56	8.25	0.263675	0.263675	0.263675
1333.98	8.25	0.470838	0.470838	0.470838
1342.4	8.25	0.591183	0.591183	0.591183
1350.81	8.25	1.62713	1.62713	1.62713
1359.23	8.25	0.934842	0.934842	0.934842
1367.65	8.25	0.79281	0.79281	0.79281
1376.06	8.25	1.48087	1.48087	1.48087
1384.48	8.25	0.948861	0.948861	0.948861
1392.9	8.25	1.53563	1.53563	1.53563
1401.31	8.25	1.73299	1.73299	1.73299
1409.73	8.25	1.8556	1.8556	1.8556
1418.15	8.25	1.75579	1.75579	1.75579
1426.56	8.25	1.29034	1.29034	1.29034
1434.98	8.25	1.31732	1.31732	1.31732
1443.4	8.25	1.27403	1.27403	1.27403
1451.81	8.25	0.9075	0.9075	0.9075
1460.23	8.25	0.688582	0.688582	0.688582
1468.65	8.25	1.02116	1.02116	1.02116
1477.06	8.25	0.75131	0.75131	0.75131
1485.48	8.25	0.61491	0.61491	0.61491
1493.9	8.25	0.305691	0.305691	0.305691
1502.31	8.25	0.177949	0.177949	0.177949
1510.73	8.25	0.115203	0.115203	0.115203
1519.15	8.25	0.0799657	0.0799657	0.0799657
1527.56	8.25	0.0498575	0.0498575	0.0498575
1535.98	8.25	0.0171079	0.0171079	0.0171079
1544.4	8.25	0.0137578	0.0137578	0.0137578
1552.81	8.25	0.00681841	0.00681841	0.00681841
1561.23	8.25	0.00545384	0.00545384	0.00545384
1569.65	8.25	0.00480186	0.00480186	0.00480186
1578.06	8.25	0.00383116	0.00383116	0.00383116
1586.48	8.25	0.00461494	0.00461494	0.00461494
1594.9	8.25	0.00589085	0.00589085	0.00589085
1603.31	8.25	0.00193783	0.00193783	0.00193783
1611.73	8.25	0.00234995	0.00234995	0.00234995
1620.15	8.25	0.00179853	0.00179853	0.00179853
1628.56	8.25	0.00125985	0.00125985	0.00125985
1636.98	8.25	0.00274328	0.00274328	0.00274328
1645.4	8.25	0.00424141	0.00424141	0.00424141
1653.81	8.25	0.00901215	0.00901215	0.00901215
1662.23	8.25	0.00848069	0.00848069	0.00848069
1670.65	8.25	0.00597513	0.00597513	0.00597513
1679.06	8.25	0.00817609	0.00817609	0.00817609
1687.48	8.25	0.0149639	0.0149639	0.0149639
1695.9	8.25	0.0207783	0.0207783	0.0207783
1704.31	8.25	0.0264528	0.0264528	0.0264528
1712.73	8.25	0.0418235	0.0418235	0.0418235
1721.15	8.25	0.0545474	0.0545474	0.0545474
1729.56	8.25	0.0554239	0.0554239	0.0554239
1737.98	8.25	0.0876945	0.0876945	0.0876945
1746.4	8.25	0.0957596	0.0957596	0.0957596
1754.81	8.25	0.113439	0.113439	0.113439
1763.23	8.25	0.144813	0.144813	0.144813
1771.65	8.25	0.196155	0.196155	0.196155
1780.06	8.25	0.317497	0.317497	0.317497
1788.48	8.25	0.429638	0.429638	0.429638
1796.9	8.25	0.795684	0.795684	0.795684
1805.31	8.25	1.43254	1.43254	1.43254
1813.73	8.25	2.16435	2.16435	2.16435
1822.15	8.25	2.45293	2.45293	2.45293
1830.56	8.25	1.56543	1.56543	1.56543
1838.98	8.25	0.70572	0.70572	0.70572
1847.4	8.25	1.54124	1.54124	1.54124
1855.82	8.25	1.19255	1.19255	1.19255
1864.23	8.25	1.80497	1.80497	1.80497
1872.65	8.25	0.51887	0.51887	0.51887
1881.07	8.25	2.15332	2.15332	2.15332
1889.48	8.25	2.31919	2.31919	2.31919
1897.9	8.25	2.20824	2.20824	2.20824
1906.32	8.25	1.71516	1.71516	1.71516
1914.73	8.25	2.18507	2.18507	2.18507
1923.15	8.25	2.55985	2.55985	2.55985
1931.57	8.25	2.22439	2.22439	2.22439
1939.98	8.25	1.67754	1.67754	1.67754
1948.4	8.25	1.19489	1.19489	1.19489
1956.82	8.25	0.974822	0.974822	0.974822
1965.23	8.25	0.462489	0.462489	0.462489
1973.65	8.25	0.329535	0.329535	0.329535
1982.07	8.25	0.240017	0.240017	0.240017
1990.48	8.25	0.219166	0.219166	0.219166
1998.9	8.25	0.186911	0.186911	0.186911
2007.32	8.25	0.0821926	0.0821926	0.0821926
2015.73	8.25	0.160206	0.160206	0.160206
2024.15	8.25	0.0755615	0.0755615	0.0755615
2032.57	8.25	0.0634571	0.0634571	0.0634571
2040.98	8.25	0.0664308	0.0664308	0.0664308
2049.4	8.25	0.0212058	0.0212058	0.0212058
2057.82	8.25	0.0522235	0.0522235	0.0522235
2066.23	8.25	0.0478951	0.0478951	0.0478951
2074.65	8.25	0.0378423	0.0378423	0.0378423
2083.07	8.25	0.0233839	0.0233839	0.0233839
2091.48	8.25	0.0263827	0.0263827	0.0263827
2099.9	8.25	0.0509959	0.0509959	0.0509959
2108.32	8.25	0.0223767	0.0223767	0.0223767
2116.73	8.25	0.0332688	0.0332688	0.0332688
2125.15	8.25	0.0325384	0.0325384	0.0325384
2133.57	8.25	0.00880496	0.00880496	0.00880496
2141.98	8.25	0.00520712	0.00520712	0.00520712
2150.4	8.25	0.0489393	0.0489393	0.0489393
2158.82	8.25	0.0254653	0.0254653	0.0254653
2167.23	8.25	0.0368069	0.0368069	0.0368069
2175.65	8.25	0.0447093	0.0447093	0.0447093
2184.07	8.25	0.0666475	0.0666475	0.0666475
2192.48	8.25	0.0321938	0.0321938	0.0321938
2200.9	8.25	0.0452927	0.0452927	0.0452927
2209.32	8.25	0.0192617	0.0192617	0.0192617
2217.73	8.25	0.0213051	0.0213051	0.0213051
2226.15	8.25	0.0141682	0.0141682	0.0141682
2234.57	8.25	0.00712971	0.00712971	0.00712971
2242.98	8.25	0.00679937	0.00679937	0.00679937
2251.4	8.25	0.00353667	0.00353667	0.00353667
2259.82	8.25	0.00407812	0.00407812	0.00407812
2268.23	8.25	0.0102636	0.0102636	0.0102636
2276.65	8.25	0.00379669	0.00379669	0.00379669
2285.07	8.25	0.00668615	0.00668615	0.00668615
2293.48	8.25	0.0301352	0.0301352	0.0301352
2301.9	8.25	0.0119844	0.0119844	0.0119844
2310.32	8.25	0.0168308	0.0168308	0.0168308
2318.73	8.25	0.0366052	0.0366052	0.0366052
2327.15	8.25	0.0320441	0.0320441	0.0320441
2335.57	8.25	0.0319434	0.0319434	0.0319434
2343.98	8.25	0.0779682	0.0779682	0.0779682
2352.4	8.25	0.124457	0.124457	0.124457
2360.82	8.25	0.0834486	0.0834486	0.0834486
2369.23	8.25	0.138183	0.138183	0.138183
2377.65	8.25	0.180896	0.180896	0.180896
2386.07	8.25	0.256847	0.256847	0.256847
2394.48	8.25	0.200664	0.200664	0.200664
2402.9	8.25	0.201683	0.201683	0.201683
2411.32	8.25	0.343854	0.343854	0.343854
2419.73	8.25	0.400665	0.400665	0.400665
2428.15	8.25	0.231625	0.231625	0.231625
2436.57	8.25	0.420044	0.420044	0.420044
2444.98	8.25	0.506739	0.506739	0.506739
2453.4	8.25	0.656696	0.656696	0.656696
2461.82	8.25	0.48647	0.48647	0.48647
2470.23	8.25	0.757298	0.757298	0.757298
2478.65	8.25	0.937554	0.937554	0.937554
2487.07	8.25	1.70419	1.70419	1.70419
2495.48	8.25	1.66301	1.66301	1.66301
2503.9	8.25	1.71548	1.71548	1.71548
2512.32	8.25	2.65946	2.65946	2.65946
2520.73	8.25	3.01957	3.01957	3.01957

## Sheet: k_GF5
Wavelength	FWHM	k_Summer_M	k_Winter_M	k_1976_M
1004.77	7.67828	0.00745176	0.00745176	0.00745176
1013.2	7.68189	0.00537205	0.00537205	0.00537205
1021.62	7.68551	0.00497181	0.00497181	0.00497181
1030.05	7.68912	0.00220971	0.00220971	0.00220971
1038.48	7.69273	0.000376203	0.000376203	0.000376203
1046.91	7.69634	0.0001285	0.0001285	0.0001285
1055.33	7.69995	0.000166885	0.000166885	0.000166885
1063.76	7.70356	0.00116946	0.00116946	0.00116946
1072.19	7.70718	0.00708449	0.00708449	0.00708449
1080.62	7.71079	0.0200048	0.0200048	0.0200048
1089.04	7.7144	0.039425	0.039425	0.039425
1097.47	7.71801	0.0908522	0.0908522	0.0908522
1105.9	7.72162	0.181426	0.181426	0.181426
1114.32	7.72523	0.402312	0.402312	0.402312
1122.75	7.72885	0.865278	0.865278	0.865278
1131.18	7.73246	0.758878	0.758878	0.758878
1139.61	7.73607	0.516082	0.516082	0.516082
1148.03	7.73968	0.649564	0.649564	0.649564
1156.46	7.74329	0.37178	0.37178	0.37178
1164.89	7.7469	0.173639	0.173639	0.173639
1173.32	7.75052	0.108357	0.108357	0.108357
1181.74	7.75413	0.117858	0.117858	0.117858
1190.17	7.75774	0.10047	0.10047	0.10047
1198.6	7.76135	0.0961446	0.0961446	0.0961446
1206.8	7.3271	0.0714758	0.0714758	0.0714758
1215.2	7.76857	0.0677535	0.0677535	0.0677535
1223.6	8.1949	0.0386519	0.0386519	0.0386519
1232.34	8.48475	0.0128469	0.0128469	0.0128469
1240.76	8.26	0.00268089	0.00268089	0.00268089
1249.21	7.78302	0.000899596	0.000899596	0.000899596
1257.66	7.78663	0.000602649	0.000602649	0.000602649
1266.1	7.79024	0.00206626	0.00206626	0.00206626
1274.55	7.79386	0.00456971	0.00456971	0.00456971
1283	7.79747	0.00892127	0.00892127	0.00892127
1291.45	7.80108	0.028332	0.028332	0.028332
1299.9	7.80469	0.0639033	0.0639033	0.0639033
1308.34	7.8083	0.114404	0.114404	0.114404
1316.79	7.81191	0.191106	0.191106	0.191106
1325.24	7.81553	0.256305	0.256305	0.256305
1333.69	7.81914	0.465069	0.465069	0.465069
1342.14	7.82275	0.560699	0.560699	0.560699
1350.58	7.82636	1.63115	1.63115	1.63115
1359.03	7.82997	0.922893	0.922893	0.922893
1367.48	7.83358	0.802105	0.802105	0.802105
1375.93	7.8372	1.4851	1.4851	1.4851
1384.37	7.84081	0.946423	0.946423	0.946423
1392.82	7.84442	1.55436	1.55436	1.55436
1401.27	7.84803	1.7492	1.7492	1.7492
1409.72	7.85164	1.85542	1.85542	1.85542
1418.17	7.85525	1.77898	1.77898	1.77898
1426.61	7.85887	1.33462	1.33462	1.33462
1435.06	7.86248	1.32677	1.32677	1.32677
1443.51	7.86609	1.26845	1.26845	1.26845
1451.96	7.8697	0.928197	0.928197	0.928197
1460.4	7.87331	0.685691	0.685691	0.685691
1468.85	7.87692	1.09316	1.09316	1.09316
1477.3	7.88054	0.740735	0.740735	0.740735
1485.75	7.88415	0.611043	0.611043	0.611043
1494.2	7.88776	0.302005	0.302005	0.302005
1502.64	7.89137	0.17947	0.17947	0.17947
1511.09	7.89498	0.118072	0.118072	0.118072
1519.54	7.89859	0.0797056	0.0797056	0.0797056
1527.99	7.90221	0.0510523	0.0510523	0.0510523
1536.43	7.90582	0.0173546	0.0173546	0.0173546
1544.88	7.90943	0.0138422	0.0138422	0.0138422
1553.33	6.6598	0.0070237	0.0070237	0.0070237
1560.93	8.4042	0.00526746	0.00526746	0.00526746
1569.23	7.8809	0.00486953	0.00486953	0.00486953
1577.61	7.45885	0.00391339	0.00391339	0.00391339
1586.31	7.4983	0.00448356	0.00448356	0.00448356
1594.96	7.7622	0.00604288	0.00604288	0.00604288
1603.38	7.93471	0.00194459	0.00194459	0.00194459
1611.79	7.93832	0.00228355	0.00228355	0.00228355
1620.21	7.94194	0.00179187	0.00179187	0.00179187
1628.63	7.94555	0.000999514	0.000999514	0.000999514
1637.05	7.94916	0.00279586	0.00279586	0.00279586
1645.47	7.95277	0.00442236	0.00442236	0.00442236
1653.89	7.95638	0.00916792	0.00916792	0.00916792
1662.31	7.95999	0.00852905	0.00852905	0.00852905
1670.73	7.96361	0.0059934	0.0059934	0.0059934
1679.15	7.96722	0.0079193	0.0079193	0.0079193
1687.57	7.97083	0.0133724	0.0133724	0.0133724
1695.99	7.97444	0.0218565	0.0218565	0.0218565
1704.41	7.97805	0.0236131	0.0236131	0.0236131
1712.83	7.98166	0.0354162	0.0354162	0.0354162
1721.25	7.98528	0.0545213	0.0545213	0.0545213
1729.67	7.98889	0.0563569	0.0563569	0.0563569
1738.08	7.9925	0.0883973	0.0883973	0.0883973
1746.5	7.99611	0.0964524	0.0964524	0.0964524
1754.92	7.99972	0.116974	0.116974	0.116974
1763.34	8.00333	0.151314	0.151314	0.151314
1771.76	8.00695	0.192444	0.192444	0.192444
1780.18	8.01056	0.30619	0.30619	0.30619
1788.6	8.01417	0.427985	0.427985	0.427985
1797.02	8.01778	0.795168	0.795168	0.795168
1805.44	8.02139	1.4304	1.4304	1.4304
1813.86	8.025	2.16486	2.16486	2.16486
1822.28	8.02862	2.45259	2.45259	2.45259
1830.7	8.03223	1.57303	1.57303	1.57303
1839.12	8.03584	0.720104	0.720104	0.720104
1847.54	8.03945	1.50051	1.50051	1.50051
1855.96	8.04306	1.19195	1.19195	1.19195
1864.38	8.04667	1.80525	1.80525	1.80525
1872.79	8.05029	0.518136	0.518136	0.518136
1881.21	8.0539	2.15504	2.15504	2.15504
1889.63	8.05751	2.32083	2.32083	2.32083
1898.05	8.06112	2.20811	2.20811	2.20811
1906.47	8.06473	1.73601	1.73601	1.73601
1914.89	8.06834	2.24166	2.24166	2.24166
1923.31	8.07196	2.57963	2.57963	2.57963
1931.73	8.07557	2.224	2.224	2.224
1940.15	8.07918	1.65304	1.65304	1.65304
1948.57	8.08279	1.19661	1.19661	1.19661
1956.99	8.0864	0.976409	0.976409	0.976409
1965.41	8.09001	0.462685	0.462685	0.462685
1973.83	8.09363	0.334034	0.334034	0.334034
1982.25	8.09724	0.240265	0.240265	0.240265
1990.67	8.10085	0.21609	0.21609	0.21609
1999.09	8.10446	0.177267	0.177267	0.177267
2007.5	8.10807	0.0758374	0.0758374	0.0758374
2015.92	8.11168	0.168346	0.168346	0.168346
2024.34	8.1153	0.0708427	0.0708427	0.0708427
2032.76	8.11891	0.051589	0.051589	0.051589
2041.18	8.12252	0.0698964	0.0698964	0.0698964
2049.6	8.12613	0.0212207	0.0212207	0.0212207
2058.02	8.12974	0.0518921	0.0518921	0.0518921
2066.44	8.13335	0.0461423	0.0461423	0.0461423
2074.86	8.13697	0.0377334	0.0377334	0.0377334
2083.28	8.14058	0.023974	0.023974	0.023974
2091.7	8.14419	0.0263967	0.0263967	0.0263967
2100.12	8.1478	0.0511314	0.0511314	0.0511314
2108.54	8.4804	0.0225393	0.0225393	0.0225393
2116.97	8.023	0.0346465	0.0346465	0.0346465
2125.41	8.476	0.0331377	0.0331377	0.0331377
2134.3	8.38695	0.00999701	0.00999701	0.00999701
2142.31	8.12115	0.00546936	0.00546936	0.00546936
2150.88	8.16947	0.0527312	0.0527312	0.0527312
2159.31	8.17308	0.0281203	0.0281203	0.0281203
2167.73	8.1767	0.0256433	0.0256433	0.0256433
2176.16	8.18031	0.0446136	0.0446136	0.0446136
2184.59	8.18392	0.0737745	0.0737745	0.0737745
2193.01	8.18753	0.0350015	0.0350015	0.0350015
2201.44	8.19114	0.0442219	0.0442219	0.0442219
2209.87	8.19475	0.0186386	0.0186386	0.0186386
2218.3	8.19837	0.0195767	0.0195767	0.0195767
2226.72	8.20198	0.0135224	0.0135224	0.0135224
2235.15	8.20559	0.00736344	0.00736344	0.00736344
2243.58	8.2092	0.00723467	0.00723467	0.00723467
2252.01	8.21281	0.00343457	0.00343457	0.00343457
2260.43	8.21642	0.00408059	0.00408059	0.00408059
2268.86	8.22004	0.0105552	0.0105552	0.0105552
2277.29	8.22365	0.00387003	0.00387003	0.00387003
2285.71	8.22726	0.0066072	0.0066072	0.0066072
2294.14	8.23087	0.0300778	0.0300778	0.0300778
2302.57	8.23448	0.0116481	0.0116481	0.0116481
2311	8.23809	0.0174817	0.0174817	0.0174817
2319.42	8.24171	0.0546845	0.0546845	0.0546845
2327.85	8.24532	0.0288415	0.0288415	0.0288415
2336.28	8.24893	0.0412291	0.0412291	0.0412291
2344.71	8.25254	0.0697291	0.0697291	0.0697291
2353.13	8.25615	0.129445	0.129445	0.129445
2361.56	8.25976	0.0764082	0.0764082	0.0764082
2369.99	8.26338	0.149423	0.149423	0.149423
2378.41	8.26699	0.19861	0.19861	0.19861
2386.84	8.2706	0.252614	0.252614	0.252614
2395.27	8.27421	0.196125	0.196125	0.196125
2403.7	8.27782	0.245727	0.245727	0.245727
2412.12	8.28143	0.343993	0.343993	0.343993
2420.55	8.28505	0.37716	0.37716	0.37716
2428.98	8.28866	0.239546	0.239546	0.239546
2437.41	8.29227	0.368683	0.368683	0.368683
2445.83	8.29588	0.554393	0.554393	0.554393
2454.26	8.29949	0.585125	0.585125	0.585125
2462.69	8.3031	0.516939	0.516939	0.516939
2471.11	8.30672	0.807515	0.807515	0.807515
2479.54	8.31033	0.991633	0.991633	0.991633
2487.97	8.31394	1.6942	1.6942	1.6942
2496.4	8.31755	1.58863	1.58863	1.58863
2504.82	8.32116	1.87196	1.87196	1.87196
2513.25	8.32477	2.66103	2.66103	2.66103
