# Supplementary material for: Towards global carbon transparency: Spaceborne imaging spectroscopy enables precise CO2 emission quantification at facility scale
Source: Research Square preprint supplement (doi:10.21203/rs.3.rs-5913782/v1), 2025-01-29
Supplement: Supplementary file 30 [file Togtoh(备份20250116).xlsx]

## Sheet: 定量
id	filename	foldername	facility	type	Latitude	Longitude	satellite	date	Time of Satellite	UTC	Local Standard Time	反演结果	不确定度	风速	排放	提取	备注
1	ZY1E_AHSI_E111.29_N40.15_20210928_010717_L1A0000342006	Togtoh_20210928_L1A0000342006	Togtoh Datang power station	electricity	40.1941	111.359	ZY1E	20210928	2021-09-28 03:46:26	2021-09-28 03:46:26	2021-09-28 11:46:26	2821.38	261.913	6.04	1	1
2	GF5B_AHSI_E111.0_N40.2_20211024_000685_L10000102095	Togtoh_20211024_L10000102095	Togtoh Datang power station	electricity	40.1941	111.359	GF5B	20211024	2021-10-24 11:25:45	2021-10-24 03:25:45	2021-10-24 11:25:45	2698.9	432.406	2.9	1	1
3	ZY1E_AHSI_E111.00_N40.15_20211122_011506_L1A0000368095	Togtoh_20211122_L1A0000368095	Togtoh Datang power station	electricity	40.1941	111.359	ZY1E	20211122	2021-11-22 03:47:34	2021-11-22 03:47:34	2021-11-22 11:47:34	2497.52	264.838	4.93	1	-1
4	ZY1E_AHSI_E111.67_N40.15_20211221_011922_L1A0000381339	Togtoh_20211221_L1A0000381339	Togtoh Datang power station	electricity	40.1941	111.359	ZY1E	20211221	2021-12-21 03:44:52	2021-12-21 03:44:52	2021-12-21 11:44:52	1823.27	264.395	3.26	1	-1
5	ZY1E_AHSI_E111.34_N40.15_20220116_012295_L1A0000392483	Togtoh_20220116_L1A0000392483	Togtoh Datang power station	electricity	40.1941	111.359	ZY1E	20220116	2022-01-16 03:46:08	2022-01-16 03:46:08	2022-01-16 11:46:08	3225.07	440.569	3.4	0.7	-1
6	GF5B_AHSI_E111.4_N40.2_20220120_001967_L10000063293	Togtoh_20220120_L10000063293	Togtoh Datang power station	electricity	40.1941	111.359	GF5B	20220120	2022-01-20 11:27:06	2022-01-20 03:27:06	2022-01-20 11:27:06	822.196	92.6619	1.86	1	1
7	ZY1F_AHSI_E111.33_N40.15_20220423_001693_L1A0000115943	Togtoh_20220423_L1A0000115943	Togtoh Datang power station	electricity	40.1941	111.359	ZY1F	20220423	2022-04-23 03:38:16	2022-04-23 03:38:16	2022-04-23 11:38:16	737.135	57.761	8.35	1	-1
8	GF5B_AHSI_E111.3_N40.2_20220425_003351_L10000119396	Togtoh_20220425_L10000119396	Togtoh Datang power station	electricity	40.1941	111.359	GF5B	20220425	2022-04-25 11:30:16	2022-04-25 03:30:16	2022-04-25 11:30:16	1625.9	135.824	7.92	1	1
9	ZY1F_AHSI_E111.33_N40.15_20220426_001736_L1A0000088439	Togtoh_20220426_L1A0000088439	Togtoh Datang power station	electricity	40.1941	111.359	ZY1F	20220426	2022-04-26 03:34:46	2022-04-26 03:34:46	2022-04-26 11:34:46	1686.04	160.888	5.19	0.7	-1
10	ZY1E_AHSI_E111.70_N40.15_20220604_014289_L1A0000458795	Togtoh_20220604_L1A0000458795	Togtoh Datang power station	electricity	40.1941	111.359	ZY1E	20220604	2022-06-04 03:43:38	2022-06-04 03:43:38	2022-06-04 11:43:38	2238.64	381.98	2.73	1	1
11	GF5B_AHSI_E111.4_N40.1_20220615_004094_L10000182395	Togtoh_20220615_L10000182395	Togtoh Datang power station	electricity	40.1941	111.359	GF5B	20220615	2022-06-15 11:31:08	2022-06-15 03:31:08	2022-06-15 11:31:08	3402.12	677.001	2.33	1	-1
12	ZY1F_AHSI_E111.39_N40.15_20220617_002483_L1A0000196545	Togtoh_20220617_L1A0000196545	Togtoh Datang power station	electricity	40.1941	111.359	ZY1F	20220617	2022-06-17 03:39:35	2022-06-17 03:39:35	2022-06-17 11:39:35	3915.19	345.924	6.03	1	1
13	ZY1F_AHSI_E111.34_N40.15_20220811_003272_L1A0000286196	Togtoh_20220811_L1A0000286196	Togtoh Datang power station	electricity	40.1941	111.359	ZY1F	20220811	2022-08-11 03:41:31	2022-08-11 03:41:31	2022-08-11 11:41:31	3704.93	357.09	1.14	1	1
14	GF5B_AHSI_E111.1_N40.2_20221016_005886_L10000220902	Togtoh_20221016_L10000220902	Togtoh Datang power station	electricity	40.1941	111.359	GF5B	20221016	2022-10-16 11:35:04	2022-10-16 03:35:04	2022-10-16 11:35:04	1472.97	203.857	3.64	1	-1
15	ZY1E_AHSI_E111.56_N40.15_20221018_016240_L1A0000516536	Togtoh_20221018_L1A0000516536	Togtoh Datang power station	electricity	40.1941	111.359	ZY1E	20221018	2022-10-18 03:43:36	2022-10-18 03:43:36	2022-10-18 11:43:36	3080	484.068	2.97	1	-1
16	ZY1E_AHSI_E111.27_N40.15_20221021_016283_L1A0000517831	Togtoh_20221021_L1A0000517831	Togtoh Datang power station	electricity	40.1941	111.359	ZY1E	20221021	2022-10-21 03:40:01	2022-10-21 03:40:01	2022-10-21 11:40:01	3296.87	391.25	4.1	1	-1
17	ZY1E_AHSI_E111.69_N40.15_20221116_016656_L1A0000529699	Togtoh_20221116_L1A0000529699	Togtoh Datang power station	electricity	40.1941	111.359	ZY1E	20221116	2022-11-16 03:41:39	2022-11-16 03:41:39	2022-11-16 11:41:39	3206.78	418.654	3.7	1	1
18	ZY1E_AHSI_E111.52_N40.15_20221119_016699_L1A0000531081	Togtoh_20221119_L1A0000531081	Togtoh Datang power station	electricity	40.1941	111.359	ZY1E	20221119	2022-11-19 03:38:01	2022-11-19 03:38:01	2022-11-19 11:38:01	3115.42	500.443	3	1	1
19	ZY1F_AHSI_E111.45_N40.15_20221205_004935_L1A0000303353	Togtoh_20221205_L1A0000303353	Togtoh Datang power station	electricity	40.1941	111.359	ZY1F	20221205	2022-12-05 03:37:42	2022-12-05 03:37:42	2022-12-05 11:37:42	2277.54	235.808	1.71	1	-1
20	GF5B_AHSI_E111.0_N40.2_20221206_006629_L10000250924	Togtoh_20221206_L10000250924	Togtoh Datang power station	electricity	40.1941	111.359	GF5B	20221206	2022-12-06 11:36:09	2022-12-06 03:36:09	2022-12-06 11:36:09	2549.18	483.83	2.47	1	-1
21	ZY1F_AHSI_E111.36_N40.15_20230123_005638_L1A0000341980	Togtoh_20230123_L1A0000341980	Togtoh Datang power station	electricity	40.1941	111.359	ZY1F	20230123	2023-01-23 03:45:48	2023-01-23 03:45:48	2023-01-23 11:45:48	1283.55	155.433	4.25	0.7	-1
22	GF5A_AHSI_E111.5_N40.2_20230208_000897_L10000006227	Togtoh_20230208_L10000006227	Togtoh Datang power station	electricity	40.1941	111.359	GF5A	20230208	2023-02-08 05:39:23	2023-02-08 05:39:23	2023-02-08 13:39:23	3000.94	419.896	3.35	0.7	-1
23	GF5A_AHSI_E111.0_N40.2_20230215_001001_L10000008924	Togtoh_20230215_L10000008924	Togtoh Datang power station	electricity	40.1941	111.359	GF5A	20230215	2023-02-15 05:40:48	2023-02-15 05:40:48	2023-02-15 13:40:48	2746.34	271.457	5.25	1	1
24	ZY1E_AHSI_E111.70_N40.15_20230306_018234_L1A0000862232	Togtoh_20230306_L1A0000862232	Togtoh Datang power station	electricity	40.1941	111.359	ZY1E	20230306	2023-03-06 03:39:32	2023-03-06 03:39:32	2023-03-06 11:39:32	2130	435.339	2.3	1	1
25	GF5B_AHSI_E111.0_N40.2_20230318_008115_L10000303878	Togtoh_20230318_L10000303878	Togtoh Datang power station	electricity	40.1941	111.359	GF5B	20230318	2023-03-18 11:37:24	2023-03-18 03:37:24	2023-03-18 11:37:24	1364.52	146.918	1.53	1	1
26	ZY1E_AHSI_E111.25_N40.15_20230401_018607_L1A0000586797	Togtoh_20230401_L1A0000586797	Togtoh Datang power station	electricity	40.1941	111.359	ZY1E	20230401	2023-04-01 03:40:43	2023-04-01 03:40:43	2023-04-01 11:40:43	2747.32	307.458	4.5	1	1
27	ZY1E_AHSI_E111.69_N40.15_20230430_019023_L1A0000597780	Togtoh_20230430_L1A0000597780	Togtoh Datang power station	electricity	40.1941	111.359	ZY1E	20230430	2023-04-30 03:38:14	2023-04-30 03:38:14	2023-04-30 11:38:14	1976.88	227.094	4.33	1	1
28	ZY1F_AHSI_E111.36_N40.15_20230513_007216_L1A0000434376	Togtoh_20230513_L1A0000434376	Togtoh Datang power station	electricity	40.1941	111.359	ZY1F	20230513	2023-05-13 03:47:55	2023-05-13 03:47:55	2023-05-13 11:47:55	3707.35	348.537	5.46	1	1
29	ZY1E_AHSI_E111.26_N40.15_20230526_019396_L1A0000607748	Togtoh_20230526_L1A0000607748	Togtoh Datang power station	electricity	40.1941	111.359	ZY1E	20230526	2023-05-26 03:39:17	2023-05-26 03:39:17	2023-05-26 11:39:17	2148.68	387.142	2.62	1	1
30	ZY1F_AHSI_E111.31_N40.15_20230611_007632_L1A0000457569	Togtoh_20230611_L1A0000457569	Togtoh Datang power station	electricity	40.1941	111.359	ZY1F	20230611	2023-06-11 03:46:46	2023-06-11 03:46:46	2023-06-11 11:46:46	3339.19	365.801	4.52	1	1
31	ZY1F_AHSI_E111.30_N40.15_20230831_008794_L1A0000524626	Togtoh_20230831_L1A0000524626	Togtoh Datang power station	electricity	40.1941	111.359	ZY1F	20230831	2023-08-31 03:49:54	2023-08-31 03:49:54	2023-08-31 11:49:54	3104.83	601.056	2.41	1	-1
32	ZY1E_AHSI_E111.58_N40.15_20230913_020974_L1A0000652982	Togtoh_20230913_L1A0000652982	Togtoh Datang power station	electricity	40.1941	111.359	ZY1E	20230913	2023-09-13 03:37:34	2023-09-13 03:37:34	2023-09-13 11:37:34	4524.46	502.019	4.47	1	1
33	GF5A_AHSI_E111.2_N40.2_20230914_004074_L10000052427	Togtoh_20230914_L10000052427	Togtoh Datang power station	electricity	40.1941	111.359	GF5A	20230914	2023-09-14 05:33:26	2023-09-14 05:33:26	2023-09-14 13:33:26	2960.72	277.566	5.59	1	-1
34	ZY1F_AHSI_E111.59_N40.15_20230926_009167_L1A0000545697	Togtoh_20230926_L1A0000545697	Togtoh Datang power station	electricity	40.1941	111.359	ZY1F	20230926	2023-09-26 03:52:03	2023-09-26 03:52:03	2023-09-26 11:52:03	2596.43	617.603	2.02	1	-1
35	ZY1E_AHSI_E111.56_N40.15_20231009_021347_L1A0000864825	Togtoh_20231009_L1A0000864825	Togtoh Datang power station	electricity	40.1941	111.359	ZY1E	20231009	2023-10-09 03:38:36	2023-10-09 03:38:36	2023-10-09 11:38:36	2533.74	543.873	2.21	1	-1
36	ZY1E_AHSI_E111.45_N40.15_20231015_021433_L1A0000866666	Togtoh_20231015_L1A0000866666	Togtoh Datang power station	electricity	40.1941	111.359	ZY1E	20231015	2023-10-15 03:31:08	2023-10-15 03:31:08	2023-10-15 11:31:08	2920.67	283.612	1.12	1	-1
37	ZY1F_AHSI_E111.59_N40.15_20231025_009583_L1A0000569055	Togtoh_20231025_L1A0000569055	Togtoh Datang power station	electricity	40.1941	111.359	ZY1F	20231025	2023-10-25 03:50:34	2023-10-25 03:50:34	2023-10-25 11:50:34	2465.41	416.839	2.73	1	-1
38	ZY1F_AHSI_E111.64_N40.15_20231028_009626_L1A0000571469	Togtoh_20231028_L1A0000571469	Togtoh Datang power station	electricity	40.1941	111.359	ZY1F	20231028	2023-10-28 03:47:02	2023-10-28 03:47:02	2023-10-28 11:47:02	2182.57	309.655	3.28	1	1
39	GF5B_AHSI_E111.5_N40.2_20231121_011728_L10000424029	Togtoh_20231121_L10000424029	Togtoh Datang power station	electricity	40.1941	111.359	GF5B	20231121	2023-11-21 11:36:36	2023-11-21 03:36:36	2023-11-21 11:36:36	2652.14	266.207	1.56	1	-1
40	GF5B_AHSI_E111.1_N40.2_20231128_011830_L10000427640	Togtoh_20231128_L10000427640	Togtoh Datang power station	electricity	40.1941	111.359	GF5B	20231128	2023-11-28 11:38:24	2023-11-28 03:38:24	2023-11-28 11:38:24	3457.44	376.67	4.61	0.7	-1
41	ZY1E_AHSI_E111.46_N40.15_20231209_022222_L1A0000688990	Togtoh_20231209_L1A0000688990	Togtoh Datang power station	electricity	40.1941	111.359	ZY1E	20231209	2023-12-09 03:28:13	2023-12-09 03:28:13	2023-12-09 11:28:13	2158.98	201.992	0.67	1	1
42	GF5B_AHSI_E111.3_N40.2_20240111_012471_L10000451083	Togtoh_20240111_L10000451083	Togtoh Datang power station	electricity	40.1941	111.359	GF5B	20240111	2024-01-11 11:37:33	2024-01-11 03:37:33	2024-01-11 11:37:33	3280.65	328.144	1	1	1
43	GF5B_AHSI_E111.5_N40.2_20240302_013214_L10000479237	Togtoh_20240302_L10000479237	Togtoh Datang power station	electricity	40.1941	111.359	GF5B	20240302	2024-03-02 11:36:20	2024-03-02 03:36:20	2024-03-02 11:36:20	3631.57	314.447	6.31	1	1
44	ZY1F_AHSI_E111.33_N40.15_20240407_011950_L1A0000704707	Togtoh_20240407_L1A0000704707	Togtoh Datang power station	electricity	40.1941	111.359	ZY1F	20240407	2024-04-07 03:51:45	2024-04-07 03:51:45	2024-04-07 11:51:45	2078.32	213.88	1.5	1	1
45	ZY1E_AHSI_E111.24_N40.15_20240420_024131_L1A0000753672	Togtoh_20240420_L1A0000753672	Togtoh Datang power station	electricity	40.1941	111.359	ZY1E	20240420	2024-04-20 03:28:41	2024-04-20 03:28:41	2024-04-20 11:28:41	2691.86	455.987	2.77	1	1
46	GF5A_AHSI_E111.3_N40.2_20240421_007279_L10000117961	Togtoh_20240421_L10000117961	Togtoh Datang power station	electricity	40.1941	111.359	GF5A	20240421	2024-04-21 05:27:52	2024-04-21 05:27:52	2024-04-21 13:27:52	2388.6	204.316	6.91	1	-1
47	ZY1F_AHSI_E111.28_N40.15_20240601_012739_L1A0000750058	Togtoh_20240601_L1A0000750058	Togtoh Datang power station	electricity	40.1941	111.359	ZY1F	20240601	2024-06-01 03:52:06	2024-06-01 03:52:06	2024-06-01 11:52:06	1693.9	160.685	0.78	1	-1
48	GF5A_AHSI_E111.2_N40.2_20240611_008022_L10000135492	Togtoh_20240611_L10000135492	Togtoh Datang power station	electricity	40.1941	111.359	GF5A	20240611	2024-06-11 05:27:34	2024-06-11 05:27:34	2024-06-11 13:27:34	2241.71	350.391	2.98	1	1
49	ZY1E_AHSI_E111.20_N40.15_20240614_024919_L1A0000870812	Togtoh_20240614_L1A0000870812	Togtoh Datang power station	electricity	40.1941	111.359	ZY1E	20240614	2024-06-14 03:26:28	2024-06-14 03:26:28	2024-06-14 11:26:28	1818.3	237.772	3.77	0.7	-1
50	ZY1F_AHSI_E111.32_N40.15_20240627_013112_L1A0000771705	Togtoh_20240627_L1A0000771705	Togtoh Datang power station	electricity	40.1941	111.359	ZY1F	20240627	2024-06-27 03:54:00	2024-06-27 03:54:00	2024-06-27 11:54:00	2917.69	374.841	3.66	1	-1
51	ZY1F_AHSI_E111.50_N40.15_20240630_013155_L1A0000773785	Togtoh_20240630_L1A0000773785	Togtoh Datang power station	electricity	40.1941	111.359	ZY1F	20240630	2024-06-30 03:50:22	2024-06-30 03:50:22	2024-06-30 11:50:22	2200.01	254.911	4.3	1	-1
52	ZY1F_AHSI_E111.31_N40.15_20240726_013528_L1A0000794946	Togtoh_20240726_L1A0000794946	Togtoh Datang power station	electricity	40.1941	111.359	ZY1F	20240726	2024-07-26 03:52:04	2024-07-26 03:52:04	2024-07-26 11:52:04	3047.34	323.112	1.82	1	1
53	GF5B_AHSI_E111.5_N40.2_20240922_016186_L10000613044	Togtoh_20240922_L10000613044	Togtoh Datang power station	electricity	40.1941	111.359	GF5B	20240922	2024-09-22 11:34:18	2024-09-22 03:34:18	2024-09-22 11:34:18	2734.61	248.207	0.41	1	-1
54	ZY1F_AHSI_E111.36_N40.15_20240922_014360_L1A0000842179	Togtoh_20240922_L1A0000842179	Togtoh Datang power station	electricity	40.1941	111.359	ZY1F	20240922	2024-09-22 03:48:57	2024-09-22 03:48:57	2024-09-22 11:48:57	2578.24	231.077	0.41	1	1
55	ZY1E_AHSI_E111.17_N40.15_20241002_026497_L1A0000836764	Togtoh_20241002_L1A0000836764	Togtoh Datang power station	electricity	40.1941	111.359	ZY1E	20241002	2024-10-02 03:21:40	2024-10-02 03:21:40	2024-10-02 11:21:40	2044.2	218.291	1.49	1	-1
56	ZY1F_AHSI_E111.33_N40.15_20241209_015479_L1A0000916049	Togtoh_20241209_L1A0000916049	Togtoh Datang power station	electricity	40.1941	111.359	ZY1F	20241209	2024-12-09 03:53:59	2024-12-09 03:53:59	2024-12-09 11:53:59	2678.74	259.205	1.1	1	1

## Sheet: 部分遮挡
id	filename	foldername	facility	type	Latitude	Longitude	satellite	date	Time of Satellite	UTC	Local Standard Time	反演结果	不确定度	风速	排放	提取	备注	Var19	Var20	Var21
1	ZY1E_AHSI_E111.29_N40.15_20210928_010717_L1A0000342006	Togtoh_20210928_L1A0000342006	Togtoh Datang power station	electricity	40.1941	111.359	ZY1E	20210928	2021-09-28 03:46:26	2021-09-28 03:46:26	2021-09-28 11:46:26	5150.67	1007.32	6.04	1	-1
2	GF5B_AHSI_E111.5_N40.2_20211017_000583_L10000009108	Togtoh_20211017_L10000009108	Togtoh Datang power station	electricity	40.1941	111.359	GF5B	20211017	2021-10-17 11:23:34	2021-10-17 03:23:34	2021-10-17 11:23:34	453.768	208.871	0.36	-1	1
3	GF5B_AHSI_E111.0_N40.2_20211024_000685_L10000102095	Togtoh_20211024_L10000102095	Togtoh Datang power station	electricity	40.1941	111.359	GF5B	20211024	2021-10-24 11:25:45	2021-10-24 03:25:45	2021-10-24 11:25:45	4591.56	1056.07	2.9	1	1
4	ZY1E_AHSI_E111.00_N40.15_20211122_011506_L1A0000368095	Togtoh_20211122_L1A0000368095	Togtoh Datang power station	electricity	40.1941	111.359	ZY1E	20211122	2021-11-22 03:47:34	2021-11-22 03:47:34	2021-11-22 11:47:34	3699.16	778.47	4.93	1	-1
5	ZY1E_AHSI_E111.67_N40.15_20211221_011922_L1A0000381339	Togtoh_20211221_L1A0000381339	Togtoh Datang power station	electricity	40.1941	111.359	ZY1E	20211221	2021-12-21 03:44:52	2021-12-21 03:44:52	2021-12-21 11:44:52	3630.47	823.165	3.26	1	-1
6	ZY1E_AHSI_E111.34_N40.15_20220116_012295_L1A0000392483	Togtoh_20220116_L1A0000392483	Togtoh Datang power station	electricity	40.1941	111.359	ZY1E	20220116	2022-01-16 03:46:08	2022-01-16 03:46:08	2022-01-16 11:46:08	3742.4	841.187	3.4	0.5	-1
7	GF5B_AHSI_E111.4_N40.2_20220120_001967_L10000063293	Togtoh_20220120_L10000063293	Togtoh Datang power station	electricity	40.1941	111.359	GF5B	20220120	2022-01-20 11:27:06	2022-01-20 03:27:06	2022-01-20 11:27:06	1224.27	332.766	1.86	1	1
8	GF5B_AHSI_E111.5_N40.1_20220305_002608_L10000088669	Togtoh_20220305_L10000088669	Togtoh Datang power station	electricity	40.1941	111.359	GF5B	20220305	2022-03-05 11:27:58	2022-03-05 03:27:58	2022-03-05 11:27:58	551.023	259.404	0.32	-1	1
9	ZY1F_AHSI_E111.33_N40.15_20220423_001693_L1A0000115943	Togtoh_20220423_L1A0000115943	Togtoh Datang power station	electricity	40.1941	111.359	ZY1F	20220423	2022-04-23 03:38:16	2022-04-23 03:38:16	2022-04-23 11:38:16	1518.89	283.894	8.35	1	-1
10	GF5B_AHSI_E111.3_N40.2_20220425_003351_L10000119396	Togtoh_20220425_L10000119396	Togtoh Datang power station	electricity	40.1941	111.359	GF5B	20220425	2022-04-25 11:30:16	2022-04-25 03:30:16	2022-04-25 11:30:16	2997.08	567.775	7.92	1	1
11	ZY1F_AHSI_E111.33_N40.15_20220426_001736_L1A0000088439	Togtoh_20220426_L1A0000088439	Togtoh Datang power station	electricity	40.1941	111.359	ZY1F	20220426	2022-04-26 03:34:46	2022-04-26 03:34:46	2022-04-26 11:34:46	1265.42	251.965	5.19	0.7	-1
12	ZY1E_AHSI_E111.70_N40.15_20220604_014289_L1A0000458795	Togtoh_20220604_L1A0000458795	Togtoh Datang power station	electricity	40.1941	111.359	ZY1E	20220604	2022-06-04 03:43:38	2022-06-04 03:43:38	2022-06-04 11:43:38	3146.89	733.451	2.73	1	1
13	GF5B_AHSI_E111.4_N40.1_20220615_004094_L10000182395	Togtoh_20220615_L10000182395	Togtoh Datang power station	electricity	40.1941	111.359	GF5B	20220615	2022-06-15 11:31:08	2022-06-15 03:31:08	2022-06-15 11:31:08	4277.89	1040.6	2.33	1	1
14	ZY1F_AHSI_E111.39_N40.15_20220617_002483_L1A0000196545	Togtoh_20220617_L1A0000196545	Togtoh Datang power station	electricity	40.1941	111.359	ZY1F	20220617	2022-06-17 03:39:35	2022-06-17 03:39:35	2022-06-17 11:39:35	6387.1	1220.34	6.03	1	1
15	ZY1F_AHSI_E111.34_N40.15_20220811_003272_L1A0000286196	Togtoh_20220811_L1A0000286196	Togtoh Datang power station	electricity	40.1941	111.359	ZY1F	20220811	2022-08-11 03:41:31	2022-08-11 03:41:31	2022-08-11 11:41:31	3155.1	980.082	1.14	1	1
16	GF5B_AHSI_E111.1_N40.2_20221016_005886_L10000220902	Togtoh_20221016_L10000220902	Togtoh Datang power station	electricity	40.1941	111.359	GF5B	20221016	2022-10-16 11:35:04	2022-10-16 03:35:04	2022-10-16 11:35:04	2741.84	619.604	3.64	1	1
17	ZY1E_AHSI_E111.56_N40.15_20221018_016240_L1A0000516536	Togtoh_20221018_L1A0000516536	Togtoh Datang power station	electricity	40.1941	111.359	ZY1E	20221018	2022-10-18 03:43:36	2022-10-18 03:43:36	2022-10-18 11:43:36	4528.35	1047.95	2.97	1	-1
18	ZY1E_AHSI_E111.27_N40.15_20221021_016283_L1A0000517831	Togtoh_20221021_L1A0000517831	Togtoh Datang power station	electricity	40.1941	111.359	ZY1E	20221021	2022-10-21 03:40:01	2022-10-21 03:40:01	2022-10-21 11:40:01	5767.54	1216.31	4.1	1	1
19	ZY1E_AHSI_E111.69_N40.15_20221116_016656_L1A0000529699	Togtoh_20221116_L1A0000529699	Togtoh Datang power station	electricity	40.1941	111.359	ZY1E	20221116	2022-11-16 03:41:39	2022-11-16 03:41:39	2022-11-16 11:41:39	4641.97	1022.47	3.7	1	-1
20	ZY1E_AHSI_E111.52_N40.15_20221119_016699_L1A0000531081	Togtoh_20221119_L1A0000531081	Togtoh Datang power station	electricity	40.1941	111.359	ZY1E	20221119	2022-11-19 03:38:01	2022-11-19 03:38:01	2022-11-19 11:38:01	6357.08	1478.01	3	1	1
21	ZY1F_AHSI_E111.45_N40.15_20221205_004935_L1A0000303353	Togtoh_20221205_L1A0000303353	Togtoh Datang power station	electricity	40.1941	111.359	ZY1F	20221205	2022-12-05 03:37:42	2022-12-05 03:37:42	2022-12-05 11:37:42	3254.67	889.392	1.71	1	1
22	GF5B_AHSI_E111.0_N40.2_20221206_006629_L10000250924	Togtoh_20221206_L10000250924	Togtoh Datang power station	electricity	40.1941	111.359	GF5B	20221206	2022-12-06 11:36:09	2022-12-06 03:36:09	2022-12-06 11:36:09	2920.47	712.842	2.47	-3	-1	不完全观测
23	GF5B_AHSI_E111.5_N40.2_20230119_007270_L10000275617	Togtoh_20230119_L10000275617	Togtoh Datang power station	electricity	40.1941	111.359	GF5B	20230119	2023-01-19 11:35:04	2023-01-19 03:35:04	2023-01-19 11:35:04	6287.24	1233.96	7.21	0.5	-1
24	ZY1F_AHSI_E111.36_N40.15_20230123_005638_L1A0000341980	Togtoh_20230123_L1A0000341980	Togtoh Datang power station	electricity	40.1941	111.359	ZY1F	20230123	2023-01-23 03:45:48	2023-01-23 03:45:48	2023-01-23 11:45:48	2238.85	488.046	4.25	0.7	-1
25	GF5A_AHSI_E111.5_N40.2_20230208_000897_L10000006227	Togtoh_20230208_L10000006227	Togtoh Datang power station	electricity	40.1941	111.359	GF5A	20230208	2023-02-08 05:39:23	2023-02-08 05:39:23	2023-02-08 13:39:23	4578.23	1013.44	3.35	0.7	-1
26	GF5A_AHSI_E111.0_N40.2_20230215_001001_L10000008924	Togtoh_20230215_L10000008924	Togtoh Datang power station	electricity	40.1941	111.359	GF5A	20230215	2023-02-15 05:40:48	2023-02-15 05:40:48	2023-02-15 13:40:48	5846.19	1149.91	5.25	1	1				0.36333
27	ZY1E_AHSI_E111.70_N40.15_20230306_018234_L1A0000862232	Togtoh_20230306_L1A0000862232	Togtoh Datang power station	electricity	40.1941	111.359	ZY1E	20230306	2023-03-06 03:39:32	2023-03-06 03:39:32	2023-03-06 11:39:32	3848.02	943.535	2.3	1	1
28	GF5B_AHSI_E111.0_N40.2_20230318_008115_L10000303878	Togtoh_20230318_L10000303878	Togtoh Datang power station	electricity	40.1941	111.359	GF5B	20230318	2023-03-18 11:37:24	2023-03-18 03:37:24	2023-03-18 11:37:24	1984.58	571.669	1.53	1	-1
29	ZY1E_AHSI_E111.25_N40.15_20230401_018607_L1A0000586797	Togtoh_20230401_L1A0000586797	Togtoh Datang power station	electricity	40.1941	111.359	ZY1E	20230401	2023-04-01 03:40:43	2023-04-01 03:40:43	2023-04-01 11:40:43	5612.08	1167.2	4.5	1	-1
30	GF5A_AHSI_E111.4_N40.2_20230407_001743_L10000021457	Togtoh_20230407_L10000021457	Togtoh Datang power station	electricity	40.1941	111.359	GF5A	20230407	2023-04-07 05:37:37	2023-04-07 05:37:37	2023-04-07 13:37:37	3167.63	715.158	4.02	-3	-1	有云
31	ZY1E_AHSI_E111.69_N40.15_20230430_019023_L1A0000597780	Togtoh_20230430_L1A0000597780	Togtoh Datang power station	electricity	40.1941	111.359	ZY1E	20230430	2023-04-30 03:38:14	2023-04-30 03:38:14	2023-04-30 11:38:14	4070.77	840.746	4.33	1	-1
32	ZY1F_AHSI_E111.36_N40.15_20230513_007216_L1A0000434376	Togtoh_20230513_L1A0000434376	Togtoh Datang power station	electricity	40.1941	111.359	ZY1F	20230513	2023-05-13 03:47:55	2023-05-13 03:47:55	2023-05-13 11:47:55	4814.77	965.372	5.46	1	-1
33	ZY1E_AHSI_E111.26_N40.15_20230526_019396_L1A0000607748	Togtoh_20230526_L1A0000607748	Togtoh Datang power station	electricity	40.1941	111.359	ZY1E	20230526	2023-05-26 03:39:17	2023-05-26 03:39:17	2023-05-26 11:39:17	2466.64	632.563	2.62	1	1
34	GF5A_AHSI_E111.5_N40.2_20230604_002589_L10000032038	Togtoh_20230604_L10000032038	Togtoh Datang power station	electricity	40.1941	111.359	GF5A	20230604	2023-06-04 05:35:25	2023-06-04 05:35:25	2023-06-04 13:35:25	1404.89	340.851	2.7	-3	1	不完全观测
35	ZY1F_AHSI_E111.31_N40.15_20230611_007632_L1A0000457569	Togtoh_20230611_L1A0000457569	Togtoh Datang power station	electricity	40.1941	111.359	ZY1F	20230611	2023-06-11 03:46:46	2023-06-11 03:46:46	2023-06-11 11:46:46	5322.25	1087.99	4.52	1	1
36	ZY1F_AHSI_E111.30_N40.15_20230831_008794_L1A0000524626	Togtoh_20230831_L1A0000524626	Togtoh Datang power station	electricity	40.1941	111.359	ZY1F	20230831	2023-08-31 03:49:54	2023-08-31 03:49:54	2023-08-31 11:49:54	3367.1	817.759	2.41	1	-1
37	ZY1E_AHSI_E111.58_N40.15_20230913_020974_L1A0000652982	Togtoh_20230913_L1A0000652982	Togtoh Datang power station	electricity	40.1941	111.359	ZY1E	20230913	2023-09-13 03:37:34	2023-09-13 03:37:34	2023-09-13 11:37:34	5410.66	1132.08	4.47	1	-1
38	GF5A_AHSI_E111.2_N40.2_20230914_004074_L10000052427	Togtoh_20230914_L10000052427	Togtoh Datang power station	electricity	40.1941	111.359	GF5A	20230914	2023-09-14 05:33:26	2023-09-14 05:33:26	2023-09-14 13:33:26	4921.53	1005.85	5.59	1	-1
39	ZY1F_AHSI_E111.59_N40.15_20230926_009167_L1A0000545697	Togtoh_20230926_L1A0000545697	Togtoh Datang power station	electricity	40.1941	111.359	ZY1F	20230926	2023-09-26 03:52:03	2023-09-26 03:52:03	2023-09-26 11:52:03	3361.54	861.997	2.02	1	1
40	GF5B_AHSI_E111.1_N40.2_20231001_010985_L10000398910	Togtoh_20231001_L10000398910	Togtoh Datang power station	electricity	40.1941	111.359	GF5B	20231001	2023-10-01 11:38:23	2023-10-01 03:38:23	2023-10-01 11:38:23	1262.04	576.37	0.36	-1	1
41	ZY1E_AHSI_E111.56_N40.15_20231009_021347_L1A0000864825	Togtoh_20231009_L1A0000864825	Togtoh Datang power station	electricity	40.1941	111.359	ZY1E	20231009	2023-10-09 03:38:36	2023-10-09 03:38:36	2023-10-09 11:38:36	3637.03	912.346	2.21	1	-1
42	ZY1E_AHSI_E111.45_N40.15_20231015_021433_L1A0000866666	Togtoh_20231015_L1A0000866666	Togtoh Datang power station	electricity	40.1941	111.359	ZY1E	20231015	2023-10-15 03:31:08	2023-10-15 03:31:08	2023-10-15 11:31:08	4346.52	1362.9	1.12	1	-1
43	ZY1F_AHSI_E111.59_N40.15_20231025_009583_L1A0000569055	Togtoh_20231025_L1A0000569055	Togtoh Datang power station	electricity	40.1941	111.359	ZY1F	20231025	2023-10-25 03:50:34	2023-10-25 03:50:34	2023-10-25 11:50:34	3141.43	734.296	2.73	1	-1
44	ZY1F_AHSI_E111.64_N40.15_20231028_009626_L1A0000571469	Togtoh_20231028_L1A0000571469	Togtoh Datang power station	electricity	40.1941	111.359	ZY1F	20231028	2023-10-28 03:47:02	2023-10-28 03:47:02	2023-10-28 11:47:02	3006.16	669.55	3.28	1	-1
45	GF5B_AHSI_E111.5_N40.2_20231121_011728_L10000424029	Togtoh_20231121_L10000424029	Togtoh Datang power station	electricity	40.1941	111.359	GF5B	20231121	2023-11-21 11:36:36	2023-11-21 03:36:36	2023-11-21 11:36:36	4159.13	1158.76	1.56	1	1
46	GF5B_AHSI_E111.1_N40.2_20231128_011830_L10000427640	Togtoh_20231128_L10000427640	Togtoh Datang power station	electricity	40.1941	111.359	GF5B	20231128	2023-11-28 11:38:24	2023-11-28 03:38:24	2023-11-28 11:38:24	6101.83	1263.95	4.61	0.5	-1
47	ZY1E_AHSI_E111.46_N40.15_20231209_022222_L1A0000688990	Togtoh_20231209_L1A0000688990	Togtoh Datang power station	electricity	40.1941	111.359	ZY1E	20231209	2023-12-09 03:28:13	2023-12-09 03:28:13	2023-12-09 11:28:13	1925.17	727.162	0.67	-1	-1
48	GF5A_AHSI_E111.4_N40.2_20240110_005796_L10000083311	Togtoh_20240110_L10000083311	Togtoh Datang power station	electricity	40.1941	111.359	GF5A	20240110	2024-01-10 05:29:24	2024-01-10 05:29:24	2024-01-10 13:29:24	6796.86	1406.77	5.19	0.5	-1
49	GF5B_AHSI_E111.3_N40.2_20240111_012471_L10000451083	Togtoh_20240111_L10000451083	Togtoh Datang power station	electricity	40.1941	111.359	GF5B	20240111	2024-01-11 11:37:33	2024-01-11 03:37:33	2024-01-11 11:37:33	3497.21	1160.29	1	1	-1
50	ZY1F_AHSI_E111.33_N40.15_20240212_011161_L1A0000659419	Togtoh_20240212_L1A0000659419	Togtoh Datang power station	electricity	40.1941	111.359	ZY1F	20240212	2024-02-12 03:51:32	2024-02-12 03:51:32	2024-02-12 11:51:32	5673.76	1167.41	5.1	0.5	-1
51	GF5B_AHSI_E111.5_N40.2_20240302_013214_L10000479237	Togtoh_20240302_L10000479237	Togtoh Datang power station	electricity	40.1941	111.359	GF5B	20240302	2024-03-02 11:36:20	2024-03-02 03:36:20	2024-03-02 11:36:20	5185.23	998.12	6.31	1	-1
52	ZY1F_AHSI_E111.33_N40.15_20240407_011950_L1A0000704707	Togtoh_20240407_L1A0000704707	Togtoh Datang power station	electricity	40.1941	111.359	ZY1F	20240407	2024-04-07 03:51:45	2024-04-07 03:51:45	2024-04-07 11:51:45	1712.05	493.486	1.5	1	-1
53	ZY1E_AHSI_E111.24_N40.15_20240420_024131_L1A0000753672	Togtoh_20240420_L1A0000753672	Togtoh Datang power station	electricity	40.1941	111.359	ZY1E	20240420	2024-04-20 03:28:41	2024-04-20 03:28:41	2024-04-20 11:28:41	3518.97	826.174	2.77	1	-1
54	GF5A_AHSI_E111.3_N40.2_20240421_007279_L10000117961	Togtoh_20240421_L10000117961	Togtoh Datang power station	electricity	40.1941	111.359	GF5A	20240421	2024-04-21 05:27:52	2024-04-21 05:27:52	2024-04-21 13:27:52	4862.74	913.289	6.91	1	-1
55	ZY1E_AHSI_E111.68_N40.15_20240519_024546_L1A0000870734	Togtoh_20240519_L1A0000870734	Togtoh Datang power station	electricity	40.1941	111.359	ZY1E	20240519	2024-05-19 03:25:40	2024-05-19 03:25:40	2024-05-19 11:25:40	5410.84	1025.18	6.11	-3	-1	不完全观测
56	ZY1F_AHSI_E111.28_N40.15_20240601_012739_L1A0000750058	Togtoh_20240601_L1A0000750058	Togtoh Datang power station	electricity	40.1941	111.359	ZY1F	20240601	2024-06-01 03:52:06	2024-06-01 03:52:06	2024-06-01 11:52:06	1022.46	366.188	0.78	1	1
57	GF5A_AHSI_E111.2_N40.2_20240611_008022_L10000135492	Togtoh_20240611_L10000135492	Togtoh Datang power station	electricity	40.1941	111.359	GF5A	20240611	2024-06-11 05:27:34	2024-06-11 05:27:34	2024-06-11 13:27:34	3420.27	784.116	2.98	1	1
58	ZY1E_AHSI_E111.20_N40.15_20240614_024919_L1A0000870812	Togtoh_20240614_L1A0000870812	Togtoh Datang power station	electricity	40.1941	111.359	ZY1E	20240614	2024-06-14 03:26:28	2024-06-14 03:26:28	2024-06-14 11:26:28	3217.68	710.077	3.77	0.7	-1
59	ZY1F_AHSI_E111.32_N40.15_20240627_013112_L1A0000771705	Togtoh_20240627_L1A0000771705	Togtoh Datang power station	electricity	40.1941	111.359	ZY1F	20240627	2024-06-27 03:54:00	2024-06-27 03:54:00	2024-06-27 11:54:00	2980.9	645.668	3.66	1	1
60	ZY1F_AHSI_E111.50_N40.15_20240630_013155_L1A0000773785	Togtoh_20240630_L1A0000773785	Togtoh Datang power station	electricity	40.1941	111.359	ZY1F	20240630	2024-06-30 03:50:22	2024-06-30 03:50:22	2024-06-30 11:50:22	3461.59	733.128	4.3	1	1
61	ZY1E_AHSI_E111.63_N40.15_20240713_025335_L1A0000870594	Togtoh_20240713_L1A0000870594	Togtoh Datang power station	electricity	40.1941	111.359	ZY1E	20240713	2024-07-13 03:23:32	2024-07-13 03:23:32	2024-07-13 11:23:32	1688.38	858.744	0.22	-1	1
62	ZY1F_AHSI_E111.31_N40.15_20240726_013528_L1A0000794946	Togtoh_20240726_L1A0000794946	Togtoh Datang power station	electricity	40.1941	111.359	ZY1F	20240726	2024-07-26 03:52:04	2024-07-26 03:52:04	2024-07-26 11:52:04	3380.53	907.077	1.82	1	1
63	GF5B_AHSI_E111.5_N40.2_20240922_016186_L10000613044	Togtoh_20240922_L10000613044	Togtoh Datang power station	electricity	40.1941	111.359	GF5B	20240922	2024-09-22 11:34:18	2024-09-22 03:34:18	2024-09-22 11:34:18	1867.31	816.739	0.41	1	-1
64	ZY1F_AHSI_E111.36_N40.15_20240922_014360_L1A0000842179	Togtoh_20240922_L1A0000842179	Togtoh Datang power station	electricity	40.1941	111.359	ZY1F	20240922	2024-09-22 03:48:57	2024-09-22 03:48:57	2024-09-22 11:48:57	1613.9	704.611	0.41	1	-1
65	ZY1E_AHSI_E111.17_N40.15_20241002_026497_L1A0000836764	Togtoh_20241002_L1A0000836764	Togtoh Datang power station	electricity	40.1941	111.359	ZY1E	20241002	2024-10-02 03:21:40	2024-10-02 03:21:40	2024-10-02 11:21:40	1964.57	579.611	1.49	1	-1
66	ZY1F_AHSI_E111.33_N40.15_20241209_015479_L1A0000916049	Togtoh_20241209_L1A0000916049	Togtoh Datang power station	electricity	40.1941	111.359	ZY1F	20241209	2024-12-09 03:53:59	2024-12-09 03:53:59	2024-12-09 11:53:59	2968.09	938.934	1.1	1	-1

## Sheet: 总表
id	filename	foldername	facility	type	Latitude	Longitude	satellite	date	Time of Satellite	UTC	Local Standard Time	反演结果	不确定度	风速	排放	提取	备注
1	ZY1E_AHSI_E111.30_N40.15_20210312_007848_L1A0000252769	Togtoh_20210312_L1A0000252769	Togtoh Datang power station	electricity	40.1941	111.359	ZY1E	20210312	2021-03-12 03:45:27	2021-03-12 03:45:27	2021-03-12 11:45:27	3760.92	1332.5	0.85	-3	-1
2	ZY1E_AHSI_E111.03_N40.15_20210801_009885_L1A0000313082	Togtoh_20210801_L1A0000313082	Togtoh Datang power station	electricity	40.1941	111.359	ZY1E	20210801	2021-08-01 03:47:17	2021-08-01 03:47:17	2021-08-01 11:47:17	6016.45	1223.92	4.81	-3	-1
3	ZY1E_AHSI_E111.29_N40.15_20210928_010717_L1A0000342006	Togtoh_20210928_L1A0000342006	Togtoh Datang power station	electricity	40.1941	111.359	ZY1E	20210928	2021-09-28 03:46:26	2021-09-28 03:46:26	2021-09-28 11:46:26	5150.67	1007.32	6.04	1	-1
4	GF5B_AHSI_E111.5_N40.2_20211017_000583_L10000009108	Togtoh_20211017_L10000009108	Togtoh Datang power station	electricity	40.1941	111.359	GF5B	20211017	2021-10-17 11:23:34	2021-10-17 03:23:34	2021-10-17 11:23:34	453.768	208.871	0.36	-1	1
5	GF5B_AHSI_E111.0_N40.2_20211024_000685_L10000102095	Togtoh_20211024_L10000102095	Togtoh Datang power station	electricity	40.1941	111.359	GF5B	20211024	2021-10-24 11:25:45	2021-10-24 03:25:45	2021-10-24 11:25:45	4591.56	1056.07	2.9	1	1
6	ZY1E_AHSI_E111.00_N40.15_20211122_011506_L1A0000368095	Togtoh_20211122_L1A0000368095	Togtoh Datang power station	electricity	40.1941	111.359	ZY1E	20211122	2021-11-22 03:47:34	2021-11-22 03:47:34	2021-11-22 11:47:34	3699.16	778.47	4.93	1	-1
7	ZY1E_AHSI_E111.67_N40.15_20211221_011922_L1A0000381339	Togtoh_20211221_L1A0000381339	Togtoh Datang power station	electricity	40.1941	111.359	ZY1E	20211221	2021-12-21 03:44:52	2021-12-21 03:44:52	2021-12-21 11:44:52	3630.47	823.165	3.26	1	-1
8	ZY1E_AHSI_E111.34_N40.15_20220116_012295_L1A0000392483	Togtoh_20220116_L1A0000392483	Togtoh Datang power station	electricity	40.1941	111.359	ZY1E	20220116	2022-01-16 03:46:08	2022-01-16 03:46:08	2022-01-16 11:46:08	3742.4	841.187	3.4	0.5	-1
9	GF5B_AHSI_E111.4_N40.2_20220120_001967_L10000063293	Togtoh_20220120_L10000063293	Togtoh Datang power station	electricity	40.1941	111.359	GF5B	20220120	2022-01-20 11:27:06	2022-01-20 03:27:06	2022-01-20 11:27:06	1323.48	351.028	1.86		1
10	GF5B_AHSI_E111.5_N40.1_20220305_002608_L10000088669	Togtoh_20220305_L10000088669	Togtoh Datang power station	electricity	40.1941	111.359	GF5B	20220305	2022-03-05 11:27:58	2022-03-05 03:27:58	2022-03-05 11:27:58	583.153	272.159	0.32		1
11	ZY1E_AHSI_E111.30_N40.15_20220312_013084_L1A0000417921	Togtoh_20220312_L1A0000417921	Togtoh Datang power station	electricity	40.1941	111.359	ZY1E	20220312	2022-03-12 03:46:00	2022-03-12 03:46:00	2022-03-12 11:46:00	1213.29	350.922	1.49	-3	1	被云遮挡
12	ZY1F_AHSI_E111.33_N40.15_20220423_001693_L1A0000115943	Togtoh_20220423_L1A0000115943	Togtoh Datang power station	electricity	40.1941	111.359	ZY1F	20220423	2022-04-23 03:38:16	2022-04-23 03:38:16	2022-04-23 11:38:16	1478.6	268.839	8.35		-1
13	GF5B_AHSI_E111.3_N40.2_20220425_003351_L10000119396	Togtoh_20220425_L10000119396	Togtoh Datang power station	electricity	40.1941	111.359	GF5B	20220425	2022-04-25 11:30:16	2022-04-25 03:30:16	2022-04-25 11:30:16	3184.47	582.963	7.92		1
14	ZY1F_AHSI_E111.33_N40.15_20220426_001736_L1A0000088439	Togtoh_20220426_L1A0000088439	Togtoh Datang power station	electricity	40.1941	111.359	ZY1F	20220426	2022-04-26 03:34:46	2022-04-26 03:34:46	2022-04-26 11:34:46	1610.05	315.371	5.19		-1
15	ZY1E_AHSI_E111.70_N40.15_20220604_014289_L1A0000458795	Togtoh_20220604_L1A0000458795	Togtoh Datang power station	electricity	40.1941	111.359	ZY1E	20220604	2022-06-04 03:43:38	2022-06-04 03:43:38	2022-06-04 11:43:38	3146.89	733.451	2.73	1	1
16	GF5B_AHSI_E111.4_N40.1_20220615_004094_L10000182395	Togtoh_20220615_L10000182395	Togtoh Datang power station	electricity	40.1941	111.359	GF5B	20220615	2022-06-15 11:31:08	2022-06-15 03:31:08	2022-06-15 11:31:08	4277.89	1040.6	2.33	1	1
17	ZY1F_AHSI_E111.39_N40.15_20220617_002483_L1A0000196545	Togtoh_20220617_L1A0000196545	Togtoh Datang power station	electricity	40.1941	111.359	ZY1F	20220617	2022-06-17 03:39:35	2022-06-17 03:39:35	2022-06-17 11:39:35	6387.1	1220.34	6.03	1	1
18	ZY1F_AHSI_E111.34_N40.15_20220811_003272_L1A0000286196	Togtoh_20220811_L1A0000286196	Togtoh Datang power station	electricity	40.1941	111.359	ZY1F	20220811	2022-08-11 03:41:31	2022-08-11 03:41:31	2022-08-11 11:41:31	3155.1	980.082	1.14	1	1
19	GF5B_AHSI_E111.1_N40.2_20221016_005886_L10000220902	Togtoh_20221016_L10000220902	Togtoh Datang power station	electricity	40.1941	111.359	GF5B	20221016	2022-10-16 11:35:04	2022-10-16 03:35:04	2022-10-16 11:35:04	2741.84	619.604	3.64	1	1
20	ZY1E_AHSI_E111.56_N40.15_20221018_016240_L1A0000516536	Togtoh_20221018_L1A0000516536	Togtoh Datang power station	electricity	40.1941	111.359	ZY1E	20221018	2022-10-18 03:43:36	2022-10-18 03:43:36	2022-10-18 11:43:36	4528.35	1047.95	2.97	1	-1
21	ZY1E_AHSI_E111.27_N40.15_20221021_016283_L1A0000517831	Togtoh_20221021_L1A0000517831	Togtoh Datang power station	electricity	40.1941	111.359	ZY1E	20221021	2022-10-21 03:40:01	2022-10-21 03:40:01	2022-10-21 11:40:01	5378.12	1117.68	4.1		1
22	ZY1E_AHSI_E111.69_N40.15_20221116_016656_L1A0000529699	Togtoh_20221116_L1A0000529699	Togtoh Datang power station	electricity	40.1941	111.359	ZY1E	20221116	2022-11-16 03:41:39	2022-11-16 03:41:39	2022-11-16 11:41:39	4641.97	1022.47	3.7	1	-1
23	ZY1E_AHSI_E111.52_N40.15_20221119_016699_L1A0000531081	Togtoh_20221119_L1A0000531081	Togtoh Datang power station	electricity	40.1941	111.359	ZY1E	20221119	2022-11-19 03:38:01	2022-11-19 03:38:01	2022-11-19 11:38:01	5190.74	1194.64	3		-1
24	ZY1F_AHSI_E111.45_N40.15_20221205_004935_L1A0000303353	Togtoh_20221205_L1A0000303353	Togtoh Datang power station	electricity	40.1941	111.359	ZY1F	20221205	2022-12-05 03:37:42	2022-12-05 03:37:42	2022-12-05 11:37:42	3224.98	872.23	1.71		-1
25	GF5B_AHSI_E111.0_N40.2_20221206_006629_L10000250924	Togtoh_20221206_L10000250924	Togtoh Datang power station	electricity	40.1941	111.359	GF5B	20221206	2022-12-06 11:36:09	2022-12-06 03:36:09	2022-12-06 11:36:09	3090.89	743.697	2.47		1
26	GF5B_AHSI_E111.5_N40.2_20230119_007270_L10000275617	Togtoh_20230119_L10000275617	Togtoh Datang power station	electricity	40.1941	111.359	GF5B	20230119	2023-01-19 11:35:04	2023-01-19 03:35:04	2023-01-19 11:35:04	5188	1006.46	7.21		1
27	ZY1F_AHSI_E111.36_N40.15_20230123_005638_L1A0000341980	Togtoh_20230123_L1A0000341980	Togtoh Datang power station	electricity	40.1941	111.359	ZY1F	20230123	2023-01-23 03:45:48	2023-01-23 03:45:48	2023-01-23 11:45:48	2002.71	424.21	4.25		-1
28	GF5A_AHSI_E111.5_N40.2_20230208_000897_L10000006227	Togtoh_20230208_L10000006227	Togtoh Datang power station	electricity	40.1941	111.359	GF5A	20230208	2023-02-08 05:39:23	2023-02-08 05:39:23	2023-02-08 13:39:23	4197.19	919.511	3.35		-1
29	GF5A_AHSI_E111.0_N40.2_20230215_001001_L10000008924	Togtoh_20230215_L10000008924	Togtoh Datang power station	electricity	40.1941	111.359	GF5A	20230215	2023-02-15 05:40:48	2023-02-15 05:40:48	2023-02-15 13:40:48	6168.97	1197.57	5.25		1
30	ZY1E_AHSI_E111.70_N40.15_20230306_018234_L1A0000862232	Togtoh_20230306_L1A0000862232	Togtoh Datang power station	electricity	40.1941	111.359	ZY1E	20230306	2023-03-06 03:39:32	2023-03-06 03:39:32	2023-03-06 11:39:32	3848.02	943.535	2.3	1	1
31	GF5B_AHSI_E111.0_N40.2_20230318_008115_L10000303878	Togtoh_20230318_L10000303878	Togtoh Datang power station	electricity	40.1941	111.359	GF5B	20230318	2023-03-18 11:37:24	2023-03-18 03:37:24	2023-03-18 11:37:24	1984.58	571.669	1.53	1	-1
32	ZY1F_AHSI_E111.37_N40.15_20230319_006427_L1A0000390455	Togtoh_20230319_L1A0000390455	Togtoh Datang power station	electricity	40.1941	111.359	ZY1F	20230319	2023-03-19 03:46:54	2023-03-19 03:46:54	2023-03-19 11:46:54	3606.89	758.572	4.53	-3	-1
33	ZY1E_AHSI_E111.25_N40.15_20230401_018607_L1A0000586797	Togtoh_20230401_L1A0000586797	Togtoh Datang power station	electricity	40.1941	111.359	ZY1E	20230401	2023-04-01 03:40:43	2023-04-01 03:40:43	2023-04-01 11:40:43	5612.08	1167.2	4.5	1	-1
34	GF5A_AHSI_E111.4_N40.2_20230407_001743_L10000021457	Togtoh_20230407_L10000021457	Togtoh Datang power station	electricity	40.1941	111.359	GF5A	20230407	2023-04-07 05:37:37	2023-04-07 05:37:37	2023-04-07 13:37:37	3167.63	715.158	4.02	1	1
35	ZY1E_AHSI_E111.69_N40.15_20230430_019023_L1A0000597780	Togtoh_20230430_L1A0000597780	Togtoh Datang power station	electricity	40.1941	111.359	ZY1E	20230430	2023-04-30 03:38:14	2023-04-30 03:38:14	2023-04-30 11:38:14	4070.77	840.746	4.33	1	-1
36	ZY1F_AHSI_E111.36_N40.15_20230513_007216_L1A0000434376	Togtoh_20230513_L1A0000434376	Togtoh Datang power station	electricity	40.1941	111.359	ZY1F	20230513	2023-05-13 03:47:55	2023-05-13 03:47:55	2023-05-13 11:47:55	4814.77	965.372	5.46	1	-1
37	ZY1E_AHSI_E111.26_N40.15_20230526_019396_L1A0000607748	Togtoh_20230526_L1A0000607748	Togtoh Datang power station	electricity	40.1941	111.359	ZY1E	20230526	2023-05-26 03:39:17	2023-05-26 03:39:17	2023-05-26 11:39:17	2466.64	632.563	2.62	1	1
38	GF5A_AHSI_E111.5_N40.2_20230604_002589_L10000032038	Togtoh_20230604_L10000032038	Togtoh Datang power station	electricity	40.1941	111.359	GF5A	20230604	2023-06-04 05:35:25	2023-06-04 05:35:25	2023-06-04 13:35:25	1422.2	335.668	2.7		1
39	ZY1F_AHSI_E111.31_N40.15_20230611_007632_L1A0000457569	Togtoh_20230611_L1A0000457569	Togtoh Datang power station	electricity	40.1941	111.359	ZY1F	20230611	2023-06-11 03:46:46	2023-06-11 03:46:46	2023-06-11 11:46:46	5591.01	1124.99	4.52		1
40	GF5A_AHSI_E111.0_N40.2_20230611_002690_L10000033082	Togtoh_20230611_L10000033082	Togtoh Datang power station	electricity	40.1941	111.359	GF5A	20230611	2023-06-11 05:36:55	2023-06-11 05:36:55	2023-06-11 13:36:55	4531.85	952.019	5.55	-3	-1
41	ZY1F_AHSI_E111.30_N40.15_20230831_008794_L1A0000524626	Togtoh_20230831_L1A0000524626	Togtoh Datang power station	electricity	40.1941	111.359	ZY1F	20230831	2023-08-31 03:49:54	2023-08-31 03:49:54	2023-08-31 11:49:54	4252.17	1022.31	2.41		1
42	ZY1E_AHSI_E111.58_N40.15_20230913_020974_L1A0000652982	Togtoh_20230913_L1A0000652982	Togtoh Datang power station	electricity	40.1941	111.359	ZY1E	20230913	2023-09-13 03:37:34	2023-09-13 03:37:34	2023-09-13 11:37:34	6472.71	1319.06	4.47		1
43	GF5A_AHSI_E111.2_N40.2_20230914_004074_L10000052427	Togtoh_20230914_L10000052427	Togtoh Datang power station	electricity	40.1941	111.359	GF5A	20230914	2023-09-14 05:33:26	2023-09-14 05:33:26	2023-09-14 13:33:26	4921.53	1005.85	5.59	1	-1
44	ZY1F_AHSI_E111.59_N40.15_20230926_009167_L1A0000545697	Togtoh_20230926_L1A0000545697	Togtoh Datang power station	electricity	40.1941	111.359	ZY1F	20230926	2023-09-26 03:52:03	2023-09-26 03:52:03	2023-09-26 11:52:03	2907.18	740.937	2.02		1
45	GF5B_AHSI_E111.1_N40.2_20231001_010985_L10000398910	Togtoh_20231001_L10000398910	Togtoh Datang power station	electricity	40.1941	111.359	GF5B	20231001	2023-10-01 11:38:23	2023-10-01 03:38:23	2023-10-01 11:38:23	1262.04	576.37	0.36	-1	1
46	ZY1E_AHSI_E111.56_N40.15_20231009_021347_L1A0000864825	Togtoh_20231009_L1A0000864825	Togtoh Datang power station	electricity	40.1941	111.359	ZY1E	20231009	2023-10-09 03:38:36	2023-10-09 03:38:36	2023-10-09 11:38:36	3637.03	912.346	2.21	1	-1
47	ZY1E_AHSI_E111.45_N40.15_20231015_021433_L1A0000866666	Togtoh_20231015_L1A0000866666	Togtoh Datang power station	electricity	40.1941	111.359	ZY1E	20231015	2023-10-15 03:31:08	2023-10-15 03:31:08	2023-10-15 11:31:08	4346.52	1362.9	1.12	1	-1
48	ZY1F_AHSI_E111.59_N40.15_20231025_009583_L1A0000569055	Togtoh_20231025_L1A0000569055	Togtoh Datang power station	electricity	40.1941	111.359	ZY1F	20231025	2023-10-25 03:50:34	2023-10-25 03:50:34	2023-10-25 11:50:34	3141.43	734.296	2.73	1	-1
49	ZY1F_AHSI_E111.64_N40.15_20231028_009626_L1A0000571469	Togtoh_20231028_L1A0000571469	Togtoh Datang power station	electricity	40.1941	111.359	ZY1F	20231028	2023-10-28 03:47:02	2023-10-28 03:47:02	2023-10-28 11:47:02	3006.16	669.55	3.28	1	-1
50	GF5B_AHSI_E111.5_N40.2_20231121_011728_L10000424029	Togtoh_20231121_L10000424029	Togtoh Datang power station	electricity	40.1941	111.359	GF5B	20231121	2023-11-21 11:36:36	2023-11-21 03:36:36	2023-11-21 11:36:36	4159.13	1158.76	1.56	1	1
51	GF5B_AHSI_E111.1_N40.2_20231128_011830_L10000427640	Togtoh_20231128_L10000427640	Togtoh Datang power station	electricity	40.1941	111.359	GF5B	20231128	2023-11-28 11:38:24	2023-11-28 03:38:24	2023-11-28 11:38:24	6101.83	1263.95	4.61	0.5	-1
52	ZY1E_AHSI_E111.46_N40.15_20231209_022222_L1A0000688990	Togtoh_20231209_L1A0000688990	Togtoh Datang power station	electricity	40.1941	111.359	ZY1E	20231209	2023-12-09 03:28:13	2023-12-09 03:28:13	2023-12-09 11:28:13	1710.72	643.227	0.67		-1
53	ZY1F_AHSI_E111.34_N40.15_20231219_010372_L1A0000614193	Togtoh_20231219_L1A0000614193	Togtoh Datang power station	electricity	40.1941	111.359	ZY1F	20231219	2023-12-19 03:51:02	2023-12-19 03:51:02	2023-12-19 11:51:02	9788.34	2433.09	2.22	-3	1	被云遮挡
54	GF5A_AHSI_E111.4_N40.2_20240110_005796_L10000083311	Togtoh_20240110_L10000083311	Togtoh Datang power station	electricity	40.1941	111.359	GF5A	20240110	2024-01-10 05:29:24	2024-01-10 05:29:24	2024-01-10 13:29:24	5336.44	1090.17	5.19		-1
55	GF5B_AHSI_E111.3_N40.2_20240111_012471_L10000451083	Togtoh_20240111_L10000451083	Togtoh Datang power station	electricity	40.1941	111.359	GF5B	20240111	2024-01-11 11:37:33	2024-01-11 03:37:33	2024-01-11 11:37:33	3430.91	1124.8	1		1
56	ZY1F_AHSI_E111.33_N40.15_20240212_011161_L1A0000659419	Togtoh_20240212_L1A0000659419	Togtoh Datang power station	electricity	40.1941	111.359	ZY1F	20240212	2024-02-12 03:51:32	2024-02-12 03:51:32	2024-02-12 11:51:32	4225.93	865.471	5.1		1
57	GF5B_AHSI_E111.5_N40.2_20240302_013214_L10000479237	Togtoh_20240302_L10000479237	Togtoh Datang power station	electricity	40.1941	111.359	GF5B	20240302	2024-03-02 11:36:20	2024-03-02 03:36:20	2024-03-02 11:36:20	6487.18	1220.58	6.31		1
58	ZY1F_AHSI_E111.33_N40.15_20240407_011950_L1A0000704707	Togtoh_20240407_L1A0000704707	Togtoh Datang power station	electricity	40.1941	111.359	ZY1F	20240407	2024-04-07 03:51:45	2024-04-07 03:51:45	2024-04-07 11:51:45	1471.59	421.568	1.5		1
59	ZY1E_AHSI_E111.24_N40.15_20240420_024131_L1A0000753672	Togtoh_20240420_L1A0000753672	Togtoh Datang power station	electricity	40.1941	111.359	ZY1E	20240420	2024-04-20 03:28:41	2024-04-20 03:28:41	2024-04-20 11:28:41	3500.76	810.827	2.77		1
60	GF5A_AHSI_E111.3_N40.2_20240421_007279_L10000117961	Togtoh_20240421_L10000117961	Togtoh Datang power station	electricity	40.1941	111.359	GF5A	20240421	2024-04-21 05:27:52	2024-04-21 05:27:52	2024-04-21 13:27:52	4881.39	901.831	6.91		1
61	ZY1E_AHSI_E111.68_N40.15_20240519_024546_L1A0000870734	Togtoh_20240519_L1A0000870734	Togtoh Datang power station	electricity	40.1941	111.359	ZY1E	20240519	2024-05-19 03:25:40	2024-05-19 03:25:40	2024-05-19 11:25:40	5012.78	942.534	6.11		1
62	ZY1F_AHSI_E111.28_N40.15_20240601_012739_L1A0000750058	Togtoh_20240601_L1A0000750058	Togtoh Datang power station	electricity	40.1941	111.359	ZY1F	20240601	2024-06-01 03:52:06	2024-06-01 03:52:06	2024-06-01 11:52:06	1075.46	382.06	0.78		1
63	GF5A_AHSI_E111.2_N40.2_20240611_008022_L10000135492	Togtoh_20240611_L10000135492	Togtoh Datang power station	electricity	40.1941	111.359	GF5A	20240611	2024-06-11 05:27:34	2024-06-11 05:27:34	2024-06-11 13:27:34	2923.29	664.925	2.98		1
64	ZY1E_AHSI_E111.20_N40.15_20240614_024919_L1A0000870812	Togtoh_20240614_L1A0000870812	Togtoh Datang power station	electricity	40.1941	111.359	ZY1E	20240614	2024-06-14 03:26:28	2024-06-14 03:26:28	2024-06-14 11:26:28	3642.63	782.023	3.77		-1
65	ZY1F_AHSI_E111.32_N40.15_20240627_013112_L1A0000771705	Togtoh_20240627_L1A0000771705	Togtoh Datang power station	electricity	40.1941	111.359	ZY1F	20240627	2024-06-27 03:54:00	2024-06-27 03:54:00	2024-06-27 11:54:00	2481.44	533.264	3.66		1
66	ZY1F_AHSI_E111.50_N40.15_20240630_013155_L1A0000773785	Togtoh_20240630_L1A0000773785	Togtoh Datang power station	electricity	40.1941	111.359	ZY1F	20240630	2024-06-30 03:50:22	2024-06-30 03:50:22	2024-06-30 11:50:22	3461.59	733.128	4.3	1	1
67	ZY1E_AHSI_E111.63_N40.15_20240713_025335_L1A0000870594	Togtoh_20240713_L1A0000870594	Togtoh Datang power station	electricity	40.1941	111.359	ZY1E	20240713	2024-07-13 03:23:32	2024-07-13 03:23:32	2024-07-13 11:23:32	1475.4	748.457	0.22		1
68	GF5A_AHSI_E111.5_N40.2_20240725_008663_L10000151124	Togtoh_20240725_L10000151124	Togtoh Datang power station	electricity	40.1941	111.359	GF5A	20240725	2024-07-25 05:25:34	2024-07-25 05:25:34	2024-07-25 13:25:34	5644.91	1320.02	2.88	-3	-1
69	ZY1F_AHSI_E111.31_N40.15_20240726_013528_L1A0000794946	Togtoh_20240726_L1A0000794946	Togtoh Datang power station	electricity	40.1941	111.359	ZY1F	20240726	2024-07-26 03:52:04	2024-07-26 03:52:04	2024-07-26 11:52:04	3575.21	945.842	1.82		1
70	GF5B_AHSI_E111.5_N40.2_20240922_016186_L10000613044	Togtoh_20240922_L10000613044	Togtoh Datang power station	electricity	40.1941	111.359	GF5B	20240922	2024-09-22 11:34:18	2024-09-22 03:34:18	2024-09-22 11:34:18	1294.44	565.85	0.41		1
71	ZY1F_AHSI_E111.36_N40.15_20240922_014360_L1A0000842179	Togtoh_20240922_L1A0000842179	Togtoh Datang power station	electricity	40.1941	111.359	ZY1F	20240922	2024-09-22 03:48:57	2024-09-22 03:48:57	2024-09-22 11:48:57	731.915	321.706	0.41		1
72	ZY1E_AHSI_E111.17_N40.15_20241002_026497_L1A0000836764	Togtoh_20241002_L1A0000836764	Togtoh Datang power station	electricity	40.1941	111.359	ZY1E	20241002	2024-10-02 03:21:40	2024-10-02 03:21:40	2024-10-02 11:21:40	1495.82	437.88	1.49		1
73	ZY1F_AHSI_E111.33_N40.15_20241209_015479_L1A0000916049	Togtoh_20241209_L1A0000916049	Togtoh Datang power station	electricity	40.1941	111.359	ZY1F	20241209	2024-12-09 03:53:59	2024-12-09 03:53:59	2024-12-09 11:53:59	2617.6	824.308	1.1		1

## Sheet: 检修时间表
设备	级别	起始时间	结束时间
3	A	20220413	20220520
12	C	20221218	20230105
7	B	20230525	20230607
8	B	20230823	20231002
10	A	20231007	20231211
1	C	20240111	20240204
9	A	20240304	20240417
6	B	20240515	20240630
12	A	20240607	20240627
5	B	20240827	20241011
