# Supplementary material for: Towards global carbon transparency: Spaceborne imaging spectroscopy enables precise CO2 emission quantification at facility scale
Source: Research Square preprint supplement (doi:10.21203/rs.3.rs-5913782/v1), 2025-01-29
Supplement: Supplementary file 31 [file Togtoh.xlsx]

## Sheet: 2025.1.16
id	latitude	longitude	altitude	datetime	local_datetime	ipcc_sector	gas	algorithm	plume_bounds	platform	emission	emission_uncertainty	wind_speed	wind_speed_std	wind_direction	plume_length	vertical_mass_atmosphere	filename	foldername	facility	date	state	timezone	correction	extraction	plume_quality	remarks	uncertainty_ime_part	uncertainty_wind_part	inversion_std	ratio_plume_bkg	wind_direction_offset	wind_deviation	wind_fit	ratio_rgb_outlier	id_epa_facility	q_former	q_latter	emission_epa	quantification_error
1	40.1941	111.359	1067	2021-09-28 03:46:26	2021-09-28 11:46:26	Electricity Generation (1.A.1.a.i)	CO2		[111.335419, 40.193345, 111.402451, 40.241094]	ZY1E	2809.23	271.774	6.04	0.635164	219	2438.43	639253	ZY1E_AHSI_E111.29_N40.15_20210928_010717_L1A0000342006	Togtoh_20210928_L1A0000342006	Togtoh Datang power station	20210928		+08	0	1	1		32.7845	238.99	10.1904	7.05146	11.3825	22.9167		0.0403429
2	40.1941	111.359	1067	2021-10-24 03:25:45	2021-10-24 11:25:45	Electricity Generation (1.A.1.a.i)	CO2		[111.350537, 40.185934, 111.409314, 40.229076]	GF5B	2890.15	488.598	2.9	0.0305505	224	2864.3	1.33853e+06	GF5B_AHSI_E111.0_N40.2_20211024_000685_L10000102095	Togtoh_20211024_L10000102095	Togtoh Datang power station	20211024		+08	0	-1	0.7		20.3676	468.23	9.22625	7.75732	0.822454	0.795038		0.0179816
3	40.1941	111.359	1067	2021-11-22 03:47:34	2021-11-22 11:47:34	Electricity Generation (1.A.1.a.i)	CO2		[111.340242, 40.169281, 111.379733, 40.205098]	ZY1E	2050.6	238.722	4.93	0.349476	264	1960.54	490855	ZY1E_AHSI_E111.00_N40.15_20211122_011506_L1A0000368095	Togtoh_20211122_L1A0000368095	Togtoh Datang power station	20211122		+08	0	-1	0.7		35.4327	203.289	11.9332	6.14497	73.075	120.087		0.0226866
4	40.1941	111.359	1067	2021-12-21 03:44:52	2021-12-21 11:44:52	Electricity Generation (1.A.1.a.i)	CO2		[111.335102, 40.180761, 111.406780, 40.225483]	ZY1E	1735.31	273.329	3.26	0.425793	223	2024.23	530059	ZY1E_AHSI_E111.67_N40.15_20211221_011922_L1A0000381339	Togtoh_20211221_L1A0000381339	Togtoh Datang power station	20211221		+08	0	-1	0.7		24.3006	249.028	10.0515	4.58794	156.621	170.195		0.0251816
5	40.1941	111.359	1067	2022-01-16 03:46:08	2022-01-16 11:46:08	Electricity Generation (1.A.1.a.i)	CO2		[111.339894, 40.173223, 111.451673, 40.212422]	ZY1E	2506.23	374.66	3.4	0.868504	272	3101.01	1.1453e+06	ZY1E_AHSI_E111.34_N40.15_20220116_012295_L1A0000392483	Togtoh_20220116_L1A0000392483	Togtoh Datang power station	20220116		+08	0	-1	0.7		29.6666	344.993	13.4003	5.85302	136.655	154.876		0.0112102
6	40.1941	111.359	1067	2022-01-20 03:27:06	2022-01-20 11:27:06	Electricity Generation (1.A.1.a.i)	CO2		[111.347948, 40.197965, 111.365347, 40.238272]	GF5B	944.158	146.554	1.86	0.91	126	1646.85	334972	GF5B_AHSI_E111.4_N40.2_20220120_001967_L10000063293	Togtoh_20220120_L10000063293	Togtoh Datang power station	20220120		+08	0	1	1		14.9008	131.654	9.13211	4.68747	52.3303	32.4448		0.0320531
8	40.1941	111.359	1067	2022-04-25 03:30:16	2022-04-25 11:30:16	Electricity Generation (1.A.1.a.i)	CO2		[111.357013, 40.193976, 111.395037, 40.213713]	GF5B	1400.03	120.873	7.92	1.10387	233	1330.28	199168	GF5B_AHSI_E111.3_N40.2_20220425_003351_L10000119396	Togtoh_20220425_L10000119396	Togtoh Datang power station	20220425		+08	0	1	1		21.3653	99.5074	6.06215	5.95209	9.76481	25.7791		0.0405306
9	40.1941	111.359	1067	2022-04-26 03:34:46	2022-04-26 11:34:46	Electricity Generation (1.A.1.a.i)	CO2		[111.268283, 40.101423, 111.375851, 40.194884]	ZY1F	1324.18	132.087	5.19	0.115326	25	4576.05	722689	ZY1F_AHSI_E111.33_N40.15_20220426_001736_L1A0000088439	Togtoh_20220426_L1A0000088439	Togtoh Datang power station	20220426		+08	0	-1	0.7		6.00237	126.085	1.9424	9.09656	15.2699	26.4168		0.0413633
10	40.1941	111.359	1067	2022-06-04 03:43:38	2022-06-04 11:43:38	Electricity Generation (1.A.1.a.i)	CO2		[111.339416, 40.164704, 111.385878, 40.198308]	ZY1E	1896.91	342.75	2.73	0.355012	298	2422.08	787957	ZY1E_AHSI_E111.70_N40.15_20220604_014289_L1A0000458795	Togtoh_20220604_L1A0000458795	Togtoh Datang power station	20220604		+08	0	1	1		14.5017	328.248	6.78484	14.9548	44.5306	40.5228		0.0231871
11	40.1941	111.359	1067	2022-06-15 03:31:08	2022-06-15 11:31:08	Electricity Generation (1.A.1.a.i)	CO2		[111.349836, 40.168638, 111.426673, 40.216698]	GF5B	2684.25	569.585	2.33	0.417892	170	3205.97	1.87163e+06	GF5B_AHSI_E111.4_N40.1_20220615_004094_L10000182395	Togtoh_20220615_L10000182395	Togtoh Datang power station	20220615		+08	0	1	1		11.0081	558.577	5.45586	17.2129	109.854	85.3197		0.0388735
12	40.1941	111.359	1067	2022-06-17 03:39:35	2022-06-17 11:39:35	Electricity Generation (1.A.1.a.i)	CO2		[111.353402, 40.193689, 111.442064, 40.228103]	ZY1F	3293.21	301.751	6.03	0.328684	220	2184.99	820541	ZY1F_AHSI_E111.39_N40.15_20220617_002483_L1A0000196545	Togtoh_20220617_L1A0000196545	Togtoh Datang power station	20220617		+08	0	1	1		21.2555	280.495	6.72394	16.5072	19.5499	39.2952		0.043902
13	40.1941	111.359	1067	2022-08-11 03:41:31	2022-08-11 11:41:31	Electricity Generation (1.A.1.a.i)	CO2		[111.271831, 40.174421, 111.367760, 40.207078]	ZY1F	2725.8	390.862	1.14	0.268514	232	3249.77	2.12724e+06	ZY1F_AHSI_E111.34_N40.15_20220811_003272_L1A0000286196	Togtoh_20220811_L1A0000286196	Togtoh Datang power station	20220811		+08	0	1	1		12.6498	378.212	8.87032	18.1412	143.492	54.527		0.0371143
14	40.1941	111.359	1067	2022-10-16 03:35:04	2022-10-16 11:35:04	Electricity Generation (1.A.1.a.i)	CO2		[111.334871, 40.114639, 111.365880, 40.193466]	GF5B	2064.86	289.903	3.64	0.652559	16	2225.45	652390	GF5B_AHSI_E111.1_N40.2_20221016_005886_L10000220902	Togtoh_20221016_L10000220902	Togtoh Datang power station	20221016		+08	0	-1	0.7		23.6779	266.226	9.18994	6.97997	27.8603	33.8038		0.0144102
15	40.1941	111.359	1067	2022-10-18 03:43:36	2022-10-18 11:43:36	Electricity Generation (1.A.1.a.i)	CO2		[111.314896, 40.172612, 111.399906, 40.231038]	ZY1E	2531.32	425.686	2.97	0.0173205	228	2929.1	1.18164e+06	ZY1E_AHSI_E111.56_N40.15_20221018_016240_L1A0000516536	Togtoh_20221018_L1A0000516536	Togtoh Datang power station	20221018		+08	0	-1	0.7		25.8688	399.817	12.1409	6.91095	112.935	111.806		0.0225633
16	40.1941	111.359	1067	2022-10-21 03:40:01	2022-10-21 11:40:01	Electricity Generation (1.A.1.a.i)	CO2		[111.346314, 40.191402, 111.435121, 40.240674]	ZY1E	3215.99	402.591	4.1	0.900666	267	2945.04	1.26392e+06	ZY1E_AHSI_E111.27_N40.15_20221021_016283_L1A0000517831	Togtoh_20221021_L1A0000517831	Togtoh Datang power station	20221021		+08	0	-1	0.7		30.5401	372.051	11.2016	6.87278	32.1474	43.9348		0.0180816
17	40.1941	111.359	1067	2022-11-16 03:41:39	2022-11-16 11:41:39	Electricity Generation (1.A.1.a.i)	CO2		[111.332056, 40.165423, 111.404255, 40.232653]	ZY1E	4355.73	591.324	3.7	0.4769	218	3671.61	2.25073e+06	ZY1E_AHSI_E111.69_N40.15_20221116_016656_L1A0000529699	Togtoh_20221116_L1A0000529699	Togtoh Datang power station	20221116		+08	0	-1	0.7		38.2717	553.053	16.8667	5.56986	74.2533	91.5791		0.0212993
18	40.1941	111.359	1067	2022-11-19 03:38:01	2022-11-19 11:38:01	Electricity Generation (1.A.1.a.i)	CO2		[111.335443, 40.175858, 111.402584, 40.231168]	ZY1E	3913.04	664.009	3	0.183303	240	2628.04	1.62903e+06	ZY1E_AHSI_E111.52_N40.15_20221119_016699_L1A0000531081	Togtoh_20221119_L1A0000531081	Togtoh Datang power station	20221119		+08	0	-1	0.7		52.4651	611.544	24.4749	4.43975	97.2574	97.2574		0.0529551
19	40.1941	111.359	1067	2022-12-05 03:37:42	2022-12-05 11:37:42	Electricity Generation (1.A.1.a.i)	CO2		[111.341837, 40.182839, 111.448764, 40.215786]	ZY1F	2306.07	340.779	1.71	0.390043	263	3184.46	1.63728e+06	ZY1F_AHSI_E111.45_N40.15_20221205_004935_L1A0000303353	Togtoh_20221205_L1A0000303353	Togtoh Datang power station	20221205		+08	0	-1	0.7		19.5067	321.273	11.457	8.17661	166.286	94.7832		0.030651
20	40.1941	111.359	1067	2022-12-06 03:36:09	2022-12-06 11:36:09	Electricity Generation (1.A.1.a.i)	CO2		[111.334045, 40.176779, 111.396207, 40.207860]	GF5B	2322.68	475.512	2.47	0.42004	284	2305.97	921019	GF5B_AHSI_E111.0_N40.2_20221206_006629_L10000250924	Togtoh_20221206_L10000250924	Togtoh Datang power station	20221206		+08	0	1	1		24.8414	450.67	12.9228	7.69426	52.5804	43.2912		0.0213755
21	40.1941	111.359	1067	2023-01-23 03:45:48	2023-01-23 11:45:48	Electricity Generation (1.A.1.a.i)	CO2		[111.330856, 40.175795, 111.380133, 40.207577]	ZY1F	1226.29	160.274	4.25	0.795885	333	1440.06	231465	ZY1F_AHSI_E111.36_N40.15_20230123_005638_L1A0000341980	Togtoh_20230123_L1A0000341980	Togtoh Datang power station	20230123		+08	0	-1	0.7		22.784	137.49	8.36696	5.25358	74.4233	105.433		0.0490735
22	40.1941	111.359	1067	2023-02-08 05:39:23	2023-02-08 13:39:23	Electricity Generation (1.A.1.a.i)	CO2		[111.245041, 40.175605, 111.355345, 40.233212]	GF5A	4018.81	589.343	3.35	0.56	73	4873.67	2.91036e+06	GF5A_AHSI_E111.5_N40.2_20230208_000897_L10000006227	Togtoh_20230208_L10000006227	Togtoh Datang power station	20230208		+08	0	-1	0.7		28.0259	561.317	10.9265	7.02694	135.815	151.66		0.0409571
23	40.1941	111.359	1067	2023-02-15 05:40:48	2023-02-15 13:40:48	Electricity Generation (1.A.1.a.i)	CO2		[111.353432, 40.192238, 111.398320, 40.240402]	GF5A	3374.58	346.936	5.25	0.205508	239	2581.56	1.00967e+06	GF5A_AHSI_E111.0_N40.2_20230215_001001_L10000008924	Togtoh_20230215_L10000008924	Togtoh Datang power station	20230215		+08	0	1	1		28.4526	318.483	8.44711	7.94381	13.1262	22.9709		0.0243331
24	40.1941	111.359	1067	2023-03-06 03:39:32	2023-03-06 11:39:32	Electricity Generation (1.A.1.a.i)	CO2		[111.351656, 40.194423, 111.452801, 40.233010]	ZY1E	2224.91	484.757	2.3	0.305505	270	3314.7	1.43319e+06	ZY1E_AHSI_E111.70_N40.15_20230306_018234_L1A0000862232	Togtoh_20230306_L1A0000862232	Togtoh Datang power station	20230306		+08	0	1	1		14.3545	470.403	7.51686	9.94583	17.9947	13.7959		0.0189552
25	40.1941	111.359	1067	2023-03-18 03:37:24	2023-03-18 11:37:24	Electricity Generation (1.A.1.a.i)	CO2		[111.314643, 40.184290, 111.369788, 40.214765]	GF5B	1182.59	179.729	1.53	0.871225	79	1888.93	635194	GF5B_AHSI_E111.0_N40.2_20230318_008115_L10000303878	Togtoh_20230318_L10000303878	Togtoh Datang power station	20230318		+08	0	1	1		15.1664	164.563	9.77993	6.77105	25.5277	13.0191		0.0305429
26	40.1941	111.359	1067	2023-04-01 03:40:43	2023-04-01 11:40:43	Electricity Generation (1.A.1.a.i)	CO2		[111.337158, 40.190249, 111.368446, 40.244638]	ZY1E	2690.94	312.158	4.5	0.120968	177	2334.9	800860	ZY1E_AHSI_E111.25_N40.15_20230401_018607_L1A0000586797	Togtoh_20230401_L1A0000586797	Togtoh Datang power station	20230401		+08	0	-1	0.7		24.762	287.396	9.00256	6.81558	21.9651	32.9477		0.0586204
27	40.1941	111.359	1067	2023-04-30 03:38:14	2023-04-30 11:38:14	Electricity Generation (1.A.1.a.i)	CO2		[111.353646, 40.169149, 111.412990, 40.200137]	ZY1E	1752.85	210.602	4.33	0.469184	289	2134.6	527714	ZY1E_AHSI_E111.69_N40.15_20230430_019023_L1A0000597780	Togtoh_20230430_L1A0000597780	Togtoh Datang power station	20230430		+08	0	1	1		17.1984	193.404	6.12839	6.87765	15.4069	22.2374		0.0252289
28	40.1941	111.359	1067	2023-05-13 03:47:55	2023-05-13 11:47:55	Electricity Generation (1.A.1.a.i)	CO2		[111.348692, 40.191531, 111.413734, 40.254531]	ZY1F	3062.87	300.422	5.46	1.30931	206	3623.61	1.3994e+06	ZY1F_AHSI_E111.36_N40.15_20230513_007216_L1A0000434376	Togtoh_20230513_L1A0000434376	Togtoh Datang power station	20230513		+08	0	1	1		19.8554	280.567	6.61921	9.78794	3.09853	5.63932		0.0393163
29	40.1941	111.359	1067	2023-05-26 03:39:17	2023-05-26 11:39:17	Electricity Generation (1.A.1.a.i)	CO2		[111.353241, 40.193840, 111.406442, 40.230086]	ZY1E	1779.57	340.142	2.62	0.212838	198	2111.43	843040	ZY1E_AHSI_E111.26_N40.15_20230526_019396_L1A0000607748	Togtoh_20230526_L1A0000607748	Togtoh Datang power station	20230526		+08	0	1	1		17.6322	322.51	8.27537	6.47122	21.2848	18.5887		0.0937204
30	40.1941	111.359	1067	2023-06-11 03:46:46	2023-06-11 11:46:46	Electricity Generation (1.A.1.a.i)	CO2		[111.338419, 40.149442, 111.364744, 40.195365]	ZY1F	2798.46	318.901	4.52	0.752352	25	2182.41	779733	ZY1F_AHSI_E111.31_N40.15_20230611_007632_L1A0000457569	Togtoh_20230611_L1A0000457569	Togtoh Datang power station	20230611		+08	0	1	1		21.1284	297.773	7.47734	20.0184	12.565	18.9312		0.0383408
31	40.1941	111.359	1067	2023-08-31 03:49:54	2023-08-31 11:49:54	Electricity Generation (1.A.1.a.i)	CO2		[111.318646, 40.142332, 111.376981, 40.198334]	ZY1F	2888.72	593.623	2.41	0.521664	85	3312.96	1.7448e+06	ZY1F_AHSI_E111.30_N40.15_20230831_008794_L1A0000524626	Togtoh_20230831_L1A0000524626	Togtoh Datang power station	20230831		+08	0	-1	0.7		16.5225	577.1	8.44603	9.88515	41.7289	33.5223		0.0448163
32	40.1941	111.359	1067	2023-09-13 03:37:34	2023-09-13 11:37:34	Electricity Generation (1.A.1.a.i)	CO2		[111.345481, 40.191749, 111.425150, 40.247724]	ZY1E	4318.61	500.17	4.47	0.08	207	3243.45	1.33418e+06	ZY1E_AHSI_E111.58_N40.15_20230913_020974_L1A0000652982	Togtoh_20230913_L1A0000652982	Togtoh Datang power station	20230913		+08	0	1	1		36.3435	463.827	13.5866	6.61456	5.56795	8.29625		0.0465531
33	40.1941	111.359	1067	2023-09-14 05:33:26	2023-09-14 13:33:26	Electricity Generation (1.A.1.a.i)	CO2		[111.343229, 40.183397, 111.384859, 40.268952]	GF5A	2874.72	281.593	5.59	0.164418	190	3064.55	1.01667e+06	GF5A_AHSI_E111.2_N40.2_20230914_004074_L10000052427	Togtoh_20230914_L10000052427	Togtoh Datang power station	20230914		+08	0	-1	0.7		22.8545	258.738	6.85732	8.38007	6.68382	12.4542		0.0503673
34	40.1941	111.359	1067	2023-09-26 03:52:03	2023-09-26 11:52:03	Electricity Generation (1.A.1.a.i)	CO2		[111.353487, 40.183350, 111.433587, 40.222523]	ZY1F	2079.07	532.216	2.02	0.372872	237	2964.27	1.30642e+06	ZY1F_AHSI_E111.59_N40.15_20230926_009167_L1A0000545697	Togtoh_20230926_L1A0000545697	Togtoh Datang power station	20230926		+08	0	1	1		13.0747	519.141	7.38622	13.7559	33.3373	22.4471		0.0474755
35	40.1941	111.359	1067	2023-10-09 03:38:36	2023-10-09 11:38:36	Electricity Generation (1.A.1.a.i)	CO2		[111.325795, 40.175511, 111.381983, 40.213166]	ZY1E	1981.93	462.235	2.21	1.03595	5	2473.76	950616	ZY1E_AHSI_E111.56_N40.15_20231009_021347_L1A0000864825	Togtoh_20231009_L1A0000864825	Togtoh Datang power station	20231009		+08	0	-1	0.7		21.8407	440.395	11.7705	4.7467	169.619	124.953		0.0355122
36	40.1941	111.359	1067	2023-10-15 03:31:08	2023-10-15 11:31:08	Electricity Generation (1.A.1.a.i)	CO2		[111.269400, 40.131702, 111.366387, 40.210706]	ZY1E	2504.19	362.365	1.12	0.243379	350	3891.99	2.51889e+06	ZY1E_AHSI_E111.45_N40.15_20231015_021433_L1A0000866666	Togtoh_20231015_L1A0000866666	Togtoh Datang power station	20231015		+08	0	-1	0.7		14.9602	347.405	10.4307	7.76953	66.5018	24.8273		0.024498
37	40.1941	111.359	1067	2023-10-25 03:50:34	2023-10-25 11:50:34	Electricity Generation (1.A.1.a.i)	CO2		[111.335746, 40.172452, 111.420610, 40.206864]	ZY1F	2030.13	366.595	2.73	0.176163	278	3162.45	1.07789e+06	ZY1F_AHSI_E111.59_N40.15_20231025_009583_L1A0000569055	Togtoh_20231025_L1A0000569055	Togtoh Datang power station	20231025		+08	0	-1	0.7		15.2938	351.302	7.23765	7.95508	7.12076	6.47989		0.0216878
38	40.1941	111.359	1067	2023-10-28 03:47:02	2023-10-28 11:47:02	Electricity Generation (1.A.1.a.i)	CO2		[111.328995, 40.168795, 111.410727, 40.246133]	ZY1F	2247.62	336.284	3.28	0.156312	211	3490.65	1.17979e+06	ZY1F_AHSI_E111.64_N40.15_20231028_009626_L1A0000571469	Togtoh_20231028_L1A0000571469	Togtoh Datang power station	20231028		+08	0	-1	0.7		15.7036	320.581	6.50227	5.86563	120.44	131.681		0.0185653
39	40.1941	111.359	1067	2023-11-21 03:36:36	2023-11-21 11:36:36	Electricity Generation (1.A.1.a.i)	CO2		[111.353945, 40.193425, 111.460799, 40.259627]	GF5B	2917.66	421.325	1.56	0.655769	310	4094	2.8091e+06	GF5B_AHSI_E111.5_N40.2_20231121_011728_L10000424029	Togtoh_20231121_L10000424029	Togtoh Datang power station	20231121		+08	0	1	1		15.237	406.088	9.76768	6.10359	65.8689	34.2518		0.0258367
40	40.1941	111.359	1067	2023-11-28 03:38:24	2023-11-28 11:38:24	Electricity Generation (1.A.1.a.i)	CO2		[111.350441, 40.175431, 111.442431, 40.236951]	GF5B	4219.48	479.73	4.61	0.363456	257	3290.79	1.74952e+06	GF5B_AHSI_E111.1_N40.2_20231128_011830_L10000427640	Togtoh_20231128_L10000427640	Togtoh Datang power station	20231128		+08	0	-1	0.7		38.0402	441.69	13.8719	4.21077	165.802	254.783		0.0293163
41	40.1941	111.359	1067	2023-12-09 03:28:13	2023-12-09 11:28:13	Electricity Generation (1.A.1.a.i)	CO2		[111.279242, 40.185985, 111.369708, 40.226027]	ZY1E	1831.59	269.843	0.67	0.113725	117	3134.11	1.68862e+06	ZY1E_AHSI_E111.46_N40.15_20231209_022222_L1A0000688990	Togtoh_20231209_L1A0000688990	Togtoh Datang power station	20231209		+08	0	-1	0.7		16.8278	253.015	13.9381	8.0162	15.7549	3.51858		0.0229776
42	40.1941	111.359	1067	2024-01-11 03:37:33	2024-01-11 11:37:33	Electricity Generation (1.A.1.a.i)	CO2		[111.339927, 40.176937, 111.424846, 40.207079]	GF5B	3499.56	521.53	1	0.26	276	2794.07	3.16511e+06	GF5B_AHSI_E111.3_N40.2_20240111_012471_L10000451083	Togtoh_20240111_L10000451083	Togtoh Datang power station	20240111		+08	0	1	1		36.5378	484.992	27.6307	6.43007	6.58037	2.19346		0.00485714
43	40.1941	111.359	1067	2024-03-02 03:36:20	2024-03-02 11:36:20	Electricity Generation (1.A.1.a.i)	CO2		[111.345064, 40.180793, 111.417051, 40.217367]	GF5B	3721.58	333.768	6.31	0.395011	273	3093.69	1.21519e+06	GF5B_AHSI_E111.5_N40.2_20240302_013214_L10000479237	Togtoh_20240302_L10000479237	Togtoh Datang power station	20240302		+08	0	1	1		26.7646	307.003	8.32266	9.49804	35.2181	74.0754		0.0261571
44	40.1941	111.359	1067	2024-04-07 03:51:45	2024-04-07 11:51:45	Electricity Generation (1.A.1.a.i)	CO2		[111.349764, 40.187933, 111.383898, 40.217690]	ZY1F	1090.48	166.292	1.5	0.210079	180	1707.83	436558	ZY1F_AHSI_E111.33_N40.15_20240407_011950_L1A0000704707	Togtoh_20240407_L1A0000704707	Togtoh Datang power station	20240407		+08	0	-1	0.7		14.5771	151.715	9.47811	8.6956	59.202	29.601		0.0500551
45	40.1941	111.359	1067	2024-04-20 03:28:41	2024-04-20 11:28:41	Electricity Generation (1.A.1.a.i)	CO2		[111.340543, 40.174363, 111.407812, 40.208583]	ZY1E	2423.63	432.962	2.77	0.156312	283	2633.48	846683	ZY1E_AHSI_E111.24_N40.15_20240420_024131_L1A0000753672	Togtoh_20240420_L1A0000753672	Togtoh Datang power station	20240420		+08	0	1	1		20.2589	412.704	9.36099	15.8058	20.1665	18.6204		0.0394918
46	40.1941	111.359	1067	2024-04-21 05:27:52	2024-04-21 13:27:52	Electricity Generation (1.A.1.a.i)	CO2		[111.353588, 40.189915, 111.406410, 40.259142]	GF5A	2394.75	211.694	6.91	0.130767	211	2610.09	660268	GF5A_AHSI_E111.3_N40.2_20240421_007279_L10000117961	Togtoh_20240421_L10000117961	Togtoh Datang power station	20240421		+08	0	-1	0.7		25.9679	185.726	6.74993	13.1694	2.97849	6.86045		0.0279184
47	40.1941	111.359	1067	2024-06-01 03:52:06	2024-06-01 11:52:06	Electricity Generation (1.A.1.a.i)	CO2		[111.336977, 40.190956, 111.389775, 40.213126]	ZY1F	1017.63	148.537	0.78	0.213854	130	2078.67	649655	ZY1F_AHSI_E111.28_N40.15_20240601_012739_L1A0000750058	Togtoh_20240601_L1A0000750058	Togtoh Datang power station	20240601		+08	0	1	1		7.80064	140.737	5.93491	15.056	2.79273	0.72611		0.0362633
48	40.1941	111.359	1067	2024-06-11 05:27:34	2024-06-11 13:27:34	Electricity Generation (1.A.1.a.i)	CO2		[111.354115, 40.135925, 111.473715, 40.199166]	GF5A	2162.54	355.637	2.98	0.245832	284	4234.58	1.15894e+06	GF5A_AHSI_E111.2_N40.2_20240611_008022_L10000135492	Togtoh_20240611_L10000135492	Togtoh Datang power station	20240611		+08	0	1	1		15.2789	340.358	6.56801	10.0677	5.03654	5.00296		0.0427367
49	40.1941	111.359	1067	2024-06-14 03:26:28	2024-06-14 11:26:28	Electricity Generation (1.A.1.a.i)	CO2		[111.333507, 40.160035, 111.370041, 40.195108]	ZY1E	1425.22	195.905	3.77	0.685493	22	1622.74	322276	ZY1E_AHSI_E111.20_N40.15_20240614_024919_L1A0000870812	Togtoh_20240614_L1A0000870812	Togtoh Datang power station	20240614		+08	0	-1	0.7		18.0634	177.842	7.24326	8.50479	127.238	159.896		0.0457184
50	40.1941	111.359	1067	2024-06-27 03:54:00	2024-06-27 11:54:00	Electricity Generation (1.A.1.a.i)	CO2		[111.351725, 40.182270, 111.402219, 40.247066]	ZY1F	1913.97	260.912	3.66	0.072111	215	2642.72	685124	ZY1F_AHSI_E111.32_N40.15_20240627_013112_L1A0000771705	Togtoh_20240627_L1A0000771705	Togtoh Datang power station	20240627		+08	0	1	1		15.4089	245.503	6.62383	9.83234	18.7398	22.8626		0.0406918
51	40.1941	111.359	1067	2024-06-30 03:50:22	2024-06-30 11:50:22	Electricity Generation (1.A.1.a.i)	CO2		[111.352974, 40.175954, 111.423632, 40.199312]	ZY1F	1603.73	196.646	4.3	0.362951	273	1818.03	379956	ZY1F_AHSI_E111.50_N40.15_20240630_013155_L1A0000773785	Togtoh_20240630_L1A0000773785	Togtoh Datang power station	20240630		+08	0	-1	0.7		18.6392	178.006	6.88661	8.53619	154.262	221.109		0.0372633
52	40.1941	111.359	1067	2024-07-26 03:52:04	2024-07-26 11:52:04	Electricity Generation (1.A.1.a.i)	CO2		[111.353375, 40.166293, 111.454915, 40.211228]	ZY1F	3625.63	525.584	1.82	0.47184	261	3735.74	2.94439e+06	ZY1F_AHSI_E111.31_N40.15_20240726_013528_L1A0000794946	Togtoh_20240726_L1A0000794946	Togtoh Datang power station	20240726		+08	0	-1	0.7		20.1425	505.441	12.0863	12.7909	27.8233	16.8795		0.0330184
53	40.1941	111.359	1067	2024-09-22 03:34:18	2024-09-22 11:34:18	Electricity Generation (1.A.1.a.i)	CO2		[111.277071, 40.186356, 111.367722, 40.259630]	GF5B	1880.49	271.311	0.41	0.345302	76	3668.39	2.20534e+06	GF5B_AHSI_E111.5_N40.2_20240922_016186_L10000613044	Togtoh_20240922_L10000613044	Togtoh Datang power station	20240922		+08	1	-1	0.7		12.3347	258.977	11.4143	11.9133	102.186	13.9655		0.0447122
54	40.1941	111.359	1067	2024-09-22 03:48:57	2024-09-22 11:48:57	Electricity Generation (1.A.1.a.i)	CO2		[111.272660, 40.189868, 111.366872, 40.260014]	ZY1F	1603.07	231.558	0.41	0.345302	76	3903.33	2.00039e+06	ZY1F_AHSI_E111.36_N40.15_20240922_014360_L1A0000842179	Togtoh_20240922_L1A0000842179	Togtoh Datang power station	20240922		+08	0	-1	0.7		10.7877	220.77	9.73887	8.74844	41.9054	5.72708		0.0458367
55	40.1941	111.359	1067	2024-10-02 03:21:40	2024-10-02 11:21:40	Electricity Generation (1.A.1.a.i)	CO2		[111.343483, 40.175273, 111.382937, 40.218233]	ZY1E	1209.13	190.967	1.49	0.113578	222	1529.65	434618	ZY1E_AHSI_E111.17_N40.15_20241002_026497_L1A0000836764	Togtoh_20241002_L1A0000836764	Togtoh Datang power station	20241002		+08	0	-1	0.7		22.7561	168.211	15.1634	5.68076	31.6088	15.699		0.0360327
56	40.1941	111.359	1067	2024-12-09 03:53:59	2024-12-09 11:53:59	Electricity Generation (1.A.1.a.i)	CO2		[111.351972, 40.187307, 111.460639, 40.232877]	ZY1F	2717.92	393.281	1.1	0.581062	321	4275.34	3.01945e+06	ZY1F_AHSI_E111.33_N40.15_20241209_015479_L1A0000916049	Togtoh_20241209_L1A0000916049	Togtoh Datang power station	20241209		+08	0	-1	0.7		16.2876	376.993	11.9902	5.22161	63.6674	23.3447		0.030551
56	40.1941	111.359	1067	2024-12-09 03:53:59	2024-12-09 11:53:59	Electricity Generation (1.A.1.a.i)	CO2		[111.351972, 40.187307, 111.460639, 40.232877]	ZY1F	2717.92	393.281	1.1	0.581062	321	4275.34	3.01945e+06	ZY1F_AHSI_E111.33_N40.15_20241209_015479_L1A0000916049	Togtoh_20241209_L1A0000916049	Togtoh Datang power station	20241209		+08	0	-1	0.7		16.2876	376.993	11.9902	5.22161	63.6674	23.3447		0.030551

## Sheet: 检修时间表
设备	级别	起始时间	结束时间
3	A	20220413	20220520
12	C	20221218	20230105
7	B	20230525	20230607
8	B	20230823	20231002
10	A	20231007	20231211
1	C	20240111	20240204
9	A	20240304	20240417
6	B	20240515	20240630
12	A	20240607	20240627
5	B	20240827	20241011
