# Supplementary material for: Towards global carbon transparency: Spaceborne imaging spectroscopy enables precise CO2 emission quantification at facility scale
Source: Research Square preprint supplement (doi:10.21203/rs.3.rs-5913782/v1), 2025-01-29
Supplement: Supplementary file 32 [file US_electricity.xlsx]

## Sheet: 2025.1.12
id	latitude	longitude	altitude	datetime	local_datetime	ipcc_sector	gas	algorithm	plume_bounds	platform	emission	emission_uncertainty	wind_speed	wind_speed_std	wind_direction	plume_length	vertical_mass_atmosphere	filename	foldername	facility	date	state	timezone	correction	extraction	plume_quality	remarks	uncertainty_ime_part	uncertainty_wind_part	inversion_std	ratio_plume_bkg	wind_direction_offset	wind_deviation	wind_fit	ratio_rgb_outlier	id_epa_facility	q_former	q_latter	emission_epa	quantification_error	quantification_error2
1	40.4627	-107.591	1939	2019-08-02 20:08:09	2019-08-02 13:08:09	Electricity Generation (1.A.1.a.i)	CO2	RMFa	[-107.591898, 40.456378, -107.578467, 40.467516]	GF5	1466.05	247.353	3.26	0.20232	310	772.022	170791	GF5_AHSI_W107.84_N40.19_20190803_006569_L10000052859	Craig_20190802	Craig	20190803	CO	-07	0	-1	0.7		36.9661	210.387	15.2629	8.44143	1.22786	1.33427	1.5487	0.0762875	6021	1356.3	1381	1233.4	0.188622	0.188622
2	39.1747	-111.029	1725	2019-11-17 20:20:29	2019-11-17 13:20:29	Electricity Generation (1.A.1.a.i)	CO2	RMFa	[-111.048401, 39.172197, -111.016696, 39.221696]	GF5	766.44	116.173	0.91	0.0550757	96	2478.61	520463	GF5_AHSI_W111.09_N39.21_20191118_008126_L10000065664	Hunter_20191118	Hunter	20191118	UT	-07	0	-1	0.7		10.0414	106.131	8.33056	5.07501	164.466	49.8879	1.06556	0.0379813	6165	889	885.7	805.489	0.0484784	-0.0484784
3	38.5847	-85.4117	144	2019-12-24 18:36:43	2019-12-24 13:36:43	Electricity Generation (1.A.1.a.i)	CO2	RMFa	[-85.452758, 38.559955, -85.390255, 38.610859]	GF5	858.646	130.718	1.06	0.18037	139	3024.17	591435	GF5_AHSI_W85.14_N38.72_20191225_008664_L10000068784	Trimble County_20191225	Trimble County	20191225	KY	-05	0	1	1		11.6593	119.059	7.99742	6.51537	73.0137	25.7982	1.37027	0.0293375	6071	1037.4	1080.8	964.737	0.109968	-0.109968
4	47.3714	-101.834	590	2024-08-23 19:29:30	2024-08-23 13:29:30	Electricity Generation (1.A.1.a.i)	CO2	RMFa	[-101.840581, 47.365472, -101.834366, 47.370225]	GF5A	696.139	111.335	6.29	0.105357	134	345.472	58530	GF5A_AHSI_W101.6_N47.5_20240823_009093_L10000162368	Antelope Valley_20240823	Antelope Valley	20240823	ND	-06	0	1	1		53.7816	57.5536	13.3971	5.12878	137.522	288.339	1.39129	0.0573063	6469	988.6	878.5	848.567	0.179629	-0.179629
5	47.3714	-101.834	590	2024-08-30 19:31:07	2024-08-30 13:31:07	Electricity Generation (1.A.1.a.i)	CO2	RMFa	[-101.837295, 47.375042, -101.833185, 47.383637]	GF5A	486.323	95.3728	4.4	0.620672	287	366.096	22942	GF5A_AHSI_W102.1_N47.6_20240830_009196_L10000164953	Antelope Valley_20240830	Antelope Valley	20240830	ND	-06	0	-1	0.7		42.4408	52.9319	11.2629	2.36894	171.411	251.402	2.18128	0.0449375	6469	538	546.6	492.096	0.0117327	-0.0117327
6	40.4627	-107.591	1939	2023-09-16 20:09:27	2023-09-16 13:09:27	Electricity Generation (1.A.1.a.i)	CO2	RMFa	[-107.617336, 40.459746, -107.584881, 40.488595]	GF5A	1251.1	296.633	2.24	0.295691	280	1568.91	321522	GF5A_AHSI_W107.8_N40.2_20230916_004111_L10000052906	Craig_20230916	Craig	20230916	CO	-07	0	1	1		23.3008	273.332	12.5671	4.6291	119.969	89.5767	1.18259	0.0356901	6021	962.5	957.4	872.471	0.433972	0.433972
7	40.4627	-107.591	1939	2023-12-06 20:05:46	2023-12-06 13:05:46	Electricity Generation (1.A.1.a.i)	CO2	RMFa	[-107.600744, 40.457132, -107.567426, 40.482533]	GF5A	879.445	137.251	0.92	0.352326	77	1917.08	460586	GF5A_AHSI_W107.6_N40.7_20231206_005292_L10000072037	Craig_20231206	Craig	20231206	CO	-07	0	-1	0.7		15.4602	121.791	12.6543	4.43005	130.12	39.9033	0.935821	0.0438375	6021	892.1	893.5	809.405	0.0865321	0.0865321
8	40.4627	-107.591	1939	2024-06-06 20:02:05	2024-06-06 13:02:05	Electricity Generation (1.A.1.a.i)	CO2	RMFa	[-107.599209, 40.461066, -107.584372, 40.474914]	GF5A	460.86	76.5122	1.35	0.179536	48	885.885	99349.9	GF5A_AHSI_W107.6_N40.7_20240606_007957_L10000134130	Craig_20240606	Craig	20240606	CO	-07	0	-1	0.7		12.4624	64.0498	8.11624	6.97849	163.098	73.3939	1.12248	0.0434312	6021	497.9	547.3	453.181	0.0169436	0.0169436
9	40.4627	-107.591	1939	2024-06-13 20:03:23	2024-06-13 13:03:23	Electricity Generation (1.A.1.a.i)	CO2	RMFa	[-107.591571, 40.458482, -107.582726, 40.465034]	GF5A	978.512	148.473	4	0.426185	273	538.418	71193.9	GF5A_AHSI_W107.8_N40.2_20240613_008059_L10000136449	Craig_20240613	Craig	20240613	CO	-07	0	-1	0.7		32.7641	115.709	12.7069	11.7735	154.825	206.434	1.91596	0.0439935	6021	1002.9	1051.9	912.038	0.0728849	0.0728849
10	36.69	-108.481	1630	2023-12-27 20:12:59	2023-12-27 13:12:59	Electricity Generation (1.A.1.a.i)	CO2	RMFa	[-108.477337, 36.661524, -108.444572, 36.689878]	GF5A	605.56	83.0529	4.38	0.553745	315	1125.85	88047.3	GF5A_AHSI_W108.6_N36.7_20231227_005597_L10000078715	Four Corners Steam Elec Station_20231227	Four Corners Steam Elec Station	20231227	NM	-07	0	-1	0.7		16.8878	66.1651	5.74363	3.46382	137.91	201.349	2.568	0.063725	2442	797	796.8	722.99	0.162422	-0.162422
11	36.69	-108.481	1630	2024-04-07 20:11:50	2024-04-07 13:11:50	Electricity Generation (1.A.1.a.i)	CO2	RMFa	[-108.476512, 36.678480, -108.453208, 36.692022]	GF5A	992.864	146.197	3.47	1.19601	327	1250.31	180884	GF5A_AHSI_W108.8_N36.7_20240407_007083_L10000113789	Four Corners Steam Elec Station_20240407	Four Corners Steam Elec Station	20240407	NM	-07	0	1	1		12.2072	133.989	4.57289	7.47232	41.9641	48.5385	1.80093	0.04855	2442	1033.2	1037.1	937.952	0.058545	0.058545
12	36.69	-108.481	1630	2024-07-11 20:09:06	2024-07-11 13:09:06	Electricity Generation (1.A.1.a.i)	CO2	RMFa	[-108.479216, 36.660184, -108.430685, 36.688230]	GF5A	1616.28	196.037	4.31	1.2554	22	1894.26	337722	GF5A_AHSI_W108.5_N36.7_20240711_008467_L10000146576	Four Corners Steam Elec Station_20240711	Four Corners Steam Elec Station	20240711	NM	-07	0	1	1		16.9936	179.043	5.74779	7.68824	95.495	137.194	1.99992	0.0750688	2442	1414.9	1415.2	1283.62	0.259163	0.259163
13	41.0808	-101.141	948	2023-09-13 19:40:39	2023-09-13 13:40:39	Electricity Generation (1.A.1.a.i)	CO2	RMFa	[-101.147962, 41.060161, -101.111778, 41.091365]	GF5A	1580.61	187.202	4.53	0.205264	174	1797.04	144469	GF5A_AHSI_W100.9_N41.2_20230913_004068_L10000052333	Gerald Gentleman Station_20230913	Gerald Gentleman Station	20230913	NE	-06	0	1	1		19.3252	167.877	5.72342	6.2483	131.042	197.874	4.20531	0.0320312	6077	1345.6	1339.6	1217.08	0.29869	0.29869
14	41.0808	-101.141	948	2024-02-29 19:37:26	2024-02-29 13:37:26	Electricity Generation (1.A.1.a.i)	CO2	RMFa	[-101.146632, 41.085475, -101.133024, 41.096428]	GF5A	301.188	44.583	4.3	0.527289	192	714.478	28043.4	GF5A_AHSI_W101.1_N41.2_20240229_006530_L10000101560	Gerald Gentleman Station_20240229	Gerald Gentleman Station	20240229	NE	-06	0	1	1		11.1525	33.4305	3.42015	3.91405	6.93362	9.93818	1.52072	0.0833813	6077	236	237.4	214.879	0.401666	0.401666
15	41.0808	-101.141	948	2024-06-10 19:34:47	2024-06-10 13:34:47	Electricity Generation (1.A.1.a.i)	CO2	RMFa	[-101.145011, 41.076286, -101.139252, 41.081707]	GF5A	1185.72	137.855	8.3	0.151767	181	415.295	48469.7	GF5A_AHSI_W100.9_N41.2_20240610_008016_L10000135380	Gerald Gentleman Station_20240610	Gerald Gentleman Station	20240610	NE	-06	0	-1	0.5		55.9516	81.9034	14.0069	12.4066	88.8724	245.88	1.47557	0.0355375	6077	682.9	683.8	619.979	0.912523	0.912523
16	41.0808	-101.141	948	2024-09-27 19:34:25	2024-09-27 13:34:25	Electricity Generation (1.A.1.a.i)	CO2	RMFa	[-101.206975, 41.074179, -101.138552, 41.128319]	GF5A	1355.45	253.593	2.66	0.337194	86	3533.21	830879	GF5A_AHSI_W101.2_N41.2_20240927_009603_L10000174913	Gerald Gentleman Station_20240927	Gerald Gentleman Station	20240927	NE	-06	0	1	1		12.1256	241.467	5.3947	6.94309	30.4027	26.9571	1.43978	0.0659062	6077	1344	1343.3	1218.9	0.112027	0.112027
17	35.2972	-101.748	1090	2023-03-28 19:54:51	2023-03-28 13:54:51	Electricity Generation (1.A.1.a.i)	CO2	RMFa	[-101.778602, 35.292049, -101.742193, 35.324626]	GF5A	405.262	61.7002	1.6	0.412351	94	2328.13	215884	GF5A_AHSI_W101.7_N35.3_20230328_001612_L10000019840	Harrington Station_20230328	Harrington Station	20230328	TX	-06	0	-1	0.7		5.27999	56.4202	3.02358	4.64362	6.69304	3.56962	1.31369	0.0283312	6193	482.6	483.5	438.542	0.075888	-0.075888
18	35.2972	-101.748	1090	2023-09-04 19:50:29	2023-09-04 13:50:29	Electricity Generation (1.A.1.a.i)	CO2	RMFa	[-101.749152, 35.295088, -101.733331, 35.308117]	GF5A	539.863	57.8121	7.75	0.231589	210	722.916	124041	GF5A_AHSI_W101.9_N35.3_20230904_003936_L10000050446	Harrington Station_20230904	Harrington Station	20230904	TX	-06	0	1	1		18.9212	38.8909	4.66412	4.72241	2.09259	5.40586	1.0442	0.05045	6193	760.5	701.1	645.008	0.163014	-0.163014
19	35.2972	-101.748	1090	2023-10-18 19:47:26	2023-10-18 13:47:26	Electricity Generation (1.A.1.a.i)	CO2	RMFa	[-101.755052, 35.277643, -101.743262, 35.301842]	GF5A	271.866	32.1753	7.43	0.572917	20	660.533	18435.3	GF5A_AHSI_W101.4_N35.3_20231018_004577_L10000059390	Harrington Station_20231018	Harrington Station	20231018	TX	-06	0	-1	0.5		12.0625	20.1128	3.12495	4.26353	172.505	427.238	1.32803	0.0384437	6193	153	145.45	133.434	1.03745	1.03745
20	35.2972	-101.748	1090	2024-02-13 19:45:52	2024-02-13 13:45:52	Electricity Generation (1.A.1.a.i)	CO2	RMFa	[-101.756384, 35.286071, -101.738388, 35.311823]	GF5A	196.112	36.1745	3.31	0.265016	267	744.939	21855.3	GF5A_AHSI_W101.7_N35.3_20240213_006298_L10000094521	Harrington Station_20240213	Harrington Station	20240213	TX	-06	0	-1	0.7		8.4554	27.7191	3.38506	4.13108	165.919	183.064	2.80096	0.0484812	6193	324.6	326.6	295.833	0.337087	-0.337087
21	35.2972	-101.748	1090	2024-04-11 19:44:10	2024-04-11 13:44:10	Electricity Generation (1.A.1.a.i)	CO2	RMFa	[-101.769410, 35.291619, -101.723152, 35.325769]	GF5A	314.085	46.8254	0.14	0.699238	45	2312.9	288379	GF5A_AHSI_W101.6_N35.3_20240411_007143_L10000114980	Harrington Station_20240411	Harrington Station	20240411	TX	-06	0	1	1		3.73472	43.0907	3.44668	6.18613	115.804	5.40417	1.11241	0.0495437	6193	635.1	519.6	499.314	0.370967	-0.370967
22	39.3844	-80.3325	299	2023-08-19 18:21:53	2023-08-19 13:21:53	Electricity Generation (1.A.1.a.i)	CO2	RMFa	[-80.336656, 39.355096, -80.267990, 39.400765]	GF5A	1419.2	211.734	1.3	0.157162	270	3439.01	1.06433e+06	GF5A_AHSI_W80.5_N39.2_20230819_003702_L10000047101	Harrison Power Station_20230819	Harrison Power Station	20230819	WV	-05	0	1	1		14.5689	197.165	8.58201	9.82598	4.41134	1.91158	1.11168	0.0481688	3944	1369.6	1357.3	1238.57	0.14583	0.14583
23	39.3844	-80.3325	299	2023-11-15 18:17:57	2023-11-15 13:17:57	Electricity Generation (1.A.1.a.i)	CO2	RMFa	[-80.351471, 39.367445, -80.311974, 39.402086]	GF5A	1245.61	173.247	3.96	0.252389	223	1560.79	264070	GF5A_AHSI_W80.1_N39.2_20231115_004984_L10000065474	Harrison Power Station_20231115	Harrison Power Station	20231115	WV	-05	0	-1	0.7		24.6222	148.625	8.3873	5.69494	152.644	201.49	2.93761	0.0430625	3944	1970.3	1977.4	1789.25	0.303837	-0.303837
24	39.3844	-80.3325	299	2024-03-12 18:14:51	2024-03-12 13:14:51	Electricity Generation (1.A.1.a.i)	CO2	RMFa	[-80.341995, 39.373333, -80.292464, 39.405706]	GF5A	1153.52	151.05	4.29	0.212838	242	2153.05	324026	GF5A_AHSI_W80.0_N39.2_20240312_006703_L10000103880	Harrison Power Station_20240312	Harrison Power Station	20240312	WV	-05	0	-1	0.7		22.7582	128.291	7.42671	6.8058	99.9782	142.969	1.79247	0.0412125	3944	1069.7	1073.1	971.135	0.187803	0.187803
25	39.3844	-80.3325	299	2024-03-19 18:16:18	2024-03-19 13:16:18	Electricity Generation (1.A.1.a.i)	CO2	RMFa	[-80.331537, 39.384155, -80.314380, 39.405845]	GF5A	938.786	108.353	5.66	0.108167	228	1090.3	117484	GF5A_AHSI_W80.4_N39.2_20240319_006805_L10000106623	Harrison Power Station_20240319	Harrison Power Station	20240319	WV	-05	0	-1	0.7		24.6328	83.7199	6.31339	4.19143	41.8931	79.0384	2.56439	0.0414812	3944	1116	1043	994.758	0.0562671	-0.0562671
26	39.1747	-111.029	1725	2024-09-28 20:16:35	2024-09-28 13:16:35	Electricity Generation (1.A.1.a.i)	CO2	RMFa	[-111.042911, 39.168232, -111.017310, 39.182490]	GF5A	403.806	70.4715	1.61	0.270247	120	842.184	69727.5	GF5A_AHSI_W111.2_N39.2_20240928_009618_L10000175260	Hunter_20240928	Hunter	20240928	UT	-07	0	1	1		14.2502	56.2212	8.92021	3.83313	148.777	79.8438	1.64498	0.007	6165	538.7	545.3	490.297	0.176405	-0.176405
27	29.3091	-98.3205	149	2023-08-14 19:42:15	2023-08-14 13:42:15	Electricity Generation (1.A.1.a.i)	CO2	RMFa	[-98.334625, 29.306384, -98.310174, 29.325826]	GF5A	1189.91	176.768	1.7	0.011547	140	1404.86	368618	GF5A_AHSI_W98.5_N29.3_20230814_003630_L10000044804	J K Spruce_20230814	J K Spruce	20230814	TX	-06	0	1	1	完美	11.0049	165.763	5.51496	12.9851	24.6262	13.9548	1.34729	0.022475	7097	1389.2	1408.7	1272.64	0.0650094	-0.0650094
28	29.3091	-98.3205	149	2023-09-20 19:39:18	2023-09-20 13:39:18	Electricity Generation (1.A.1.a.i)	CO2	RMFa	[-98.333251, 29.305276, -98.307325, 29.367736]	GF5A	1368.32	222.938	3.06	0.127671	169	2143.56	488208	GF5A_AHSI_W98.0_N29.3_20230920_004169_L10000053680	J K Spruce_20230920	J K Spruce	20230920	TX	-06	0	1	1		13.4708	209.467	4.9582	11.1392	17.0291	17.3697	1.44139	0.0139	7097	1303	1302.6	1181.83	0.157803	0.157803
29	29.3091	-98.3205	149	2023-12-17 19:38:50	2023-12-17 13:38:50	Electricity Generation (1.A.1.a.i)	CO2	RMFa	[-98.324957, 29.301626, -98.298144, 29.319894]	GF5A	559.175	114.254	2.62	0.338674	220	1198.93	115572	GF5A_AHSI_W98.5_N29.3_20231217_005451_L10000075253	J K Spruce_20231217	J K Spruce	20231217	TX	-06	0	-1	0.7		12.9156	101.339	5.09381	5.4401	69.4542	60.6566	1.45746	0.0272312	7097	556.7	558	505.777	0.105577	0.105577
30	41.7378	-108.787	2044	2023-09-23 20:11:46	2023-09-23 13:11:46	Electricity Generation (1.A.1.a.i)	CO2	RMFa	[-108.788978, 41.737591, -108.783632, 41.740932]	GF5A	185.493	28.4419	7.1	0.44658	268	294.298	5704.82	GF5A_AHSI_W108.8_N41.7_20230923_004213_L10000054221	Jim Bridger_20230923	Jim Bridger	20230923	WY	-07	0	-1	0.5		14.3105	14.1314	3.96408	3.60612	29.646	70.1621	5.97091	0.0335937	8066	460.9	452.2	416.674	0.554825	-0.554825
31	41.7378	-108.787	2044	2023-12-13 20:08:54	2023-12-13 13:08:54	Electricity Generation (1.A.1.a.i)	CO2	RMFa	[-108.799783, 41.711603, -108.779824, 41.741542]	GF5A	858.266	131.142	4	0.674858	58	1125.57	122958	GF5A_AHSI_W108.7_N41.7_20231213_005393_L10000074107	Jim Bridger_20231213	Jim Bridger	20231213	WY	-07	0	1	1		29.6526	101.49	11.2929	4.22495	84.322	112.429	4.16617	0.0471125	8066	1825.9	1677	1638.42	0.476162	-0.476162
32	41.7378	-108.787	2044	2024-08-03 20:04:32	2024-08-03 13:04:32	Electricity Generation (1.A.1.a.i)	CO2	RMFa	[-108.822678, 41.734563, -108.778889, 41.778687]	GF5A	725.159	94.1736	4.27	0.145717	147	1527.56	144855	GF5A_AHSI_W108.6_N41.7_20240803_008802_L10000154428	Jim Bridger_20240803	Jim Bridger	20240803	WY	-07	0	-1	0.7		13.1984	80.9752	4.69159	6.26067	59.8071	85.1254	3.86551	0.0390187	8066	1441.8	1634.1	1319.61	0.450474	-0.450474
33	38.3472	-94.6467	263	2023-10-08 19:17:58	2023-10-08 13:17:58	Electricity Generation (1.A.1.a.i)	CO2	RMFa	[-94.646871, 38.342323, -94.626698, 38.357693]	GF5A	571.577	94.1496	3.4	0.138684	256	966.531	81411.3	GF5A_AHSI_W94.7_N38.2_20231008_004431_L10000057166	La Cygne_20231008	La Cygne	20231008	KS	-06	0	-1	0.7		15.4696	78.68	5.6819	6.02848	123.171	139.594	1.95161	0.0483437	1241	654.4	647.1	591.785	0.0341487	-0.0341487
34	32.2597	-94.5703	98	2023-09-08 19:22:37	2023-09-08 13:22:37	Electricity Generation (1.A.1.a.i)	CO2	RMFa	[-94.616933, 32.252032, -94.568042, 32.277081]	GF5A	2798.87	406.351	3.48	0.440038	108	2203.1	897062	GF5A_AHSI_W94.3_N32.3_20230908_003994_L10000051261	Martin Lake_20230908	Martin Lake	20230908	TX	-06	0	-1	0.7	有羽流、但周围水汽干扰也很大	29.6855	376.666	9.61623	9.99309	23.3763	27.1165	1.67783	0.049025	6146	2712.1	2709.3	2459.44	0.13801	0.13801
35	32.2597	-94.5703	98	2024-02-24 19:19:38	2024-02-24 13:19:38	Electricity Generation (1.A.1.a.i)	CO2	RMFa	[-94.618189, 32.254944, -94.572619, 32.266110]	GF5A	973.117	148.133	1.84	0.209523	319	1733.45	365042	GF5A_AHSI_W94.6_N32.3_20240224_006456_L10000098053	Martin Lake_20240224	Martin Lake	20240224	TX	-06	0	-1	0.5		12.457	135.676	5.82837	5.03538	81.2302	49.8212	0.88817	0.0406188	6146	742.7	741.2	673.335	0.445219	0.445219
36	32.2597	-94.5703	98	2024-04-22 19:19:10	2024-04-22 13:19:10	Electricity Generation (1.A.1.a.i)	CO2	RMFa	[-94.584144, 32.256461, -94.567837, 32.272164]	GF5A	646.652	106.604	1.28	0.083865	141	939.932	150585	GF5A_AHSI_W94.8_N32.3_20240422_007301_L10000118547	Martin Lake_20240422	Martin Lake	20240422	TX	-06	0	-1	0.7		16.7801	89.8239	9.18449	5.00958	84.9433	36.2425	1.13495	0.0384437	6146	723.8	716.7	654.581	0.0121132	-0.0121132
37	45.3792	-93.8958	292	2024-07-14 19:02:06	2024-07-14 13:02:06	Electricity Generation (1.A.1.a.i)	CO2	RMFa	[-93.897687, 45.343407, -93.863004, 45.379861]	GF5A	1112.67	249.971	2.36	0.155242	324	1548.64	264907	GF5A_AHSI_W94.0_N45.6_20240714_008510_L10000147652	Sherburne County_20240714	Sherburne County	20240714	MN	-06	0	1	1		22.0056	227.966	9.32593	8.03896	1.10257	0.867359	2.4241	0.0225125	6090	1646	1631.2	1492.78	0.254633	-0.254633
38	38.5847	-85.4117	144	2024-04-14 18:35:41	2024-04-14 13:35:41	Electricity Generation (1.A.1.a.i)	CO2	RMFa	[-85.428167, 38.578382, -85.387887, 38.602550]	GF5A	1797.33	183.293	5.73	0.106927	226	1766.48	404548	GF5A_AHSI_W85.3_N38.7_20240414_007185_L10000115875	Trimble County_20240414	Trimble County	20240414	KY	-05	0	1	1		24.4521	158.841	6.22146	12.3711	19.1844	36.6423	1.46431	0.045275	6071	1297.4	1354.6	1207.25	0.488782	0.488782
39	34.4236	-92.1392	93	2024-06-14 19:05:28	2024-06-14 13:05:28	Electricity Generation (1.A.1.a.i)	CO2	RMFa	[-92.142350, 34.399909, -92.122389, 34.423555]	GF5A	719.623	119.198	1.86	0.525198	36	1042.96	161689	GF5A_AHSI_W92.0_N34.3_20240614_008073_L10000136769	White Bluff_20240614	White Bluff	20240614	AR	-06	0	-1	0.7		18.8532	100.344	9.41628	8.67738	99.2047	61.5069	1.50745	0.0392125	6009	927.4	927.3	841.316	0.144645	-0.144645
40	47.371	-101.836	590	2022-03-16 17:50:55	2022-03-16 11:50:55	Electricity Generation (1.A.1.a.i)	CO2	RMFa		GF5B	672.202	81.5306	9.18	0.197569	294			GF5B_AHSI_W102.0_N47.5_20220316_002777_L10000118963	Antelope Valley_20220316	Antelope Valley	20220316	ND	-06	0	-1	0		38.2061	43.3245	9.41628	7.49039	80.7576	247.118	0.861796	0.0418625	6469	560.6	524.1	480.974	0.397583	0.397583
41	47.371	-101.836	590	2022-06-19 17:51:31	2022-06-19 11:51:31	Electricity Generation (1.A.1.a.i)	CO2	RMFa	[-101.867490, 47.343237, -101.816786, 47.381566]	GF5B	1186.97	97.1063	4.53	0.499032	227			GF5B_AHSI_W101.6_N47.5_20220619_004161_L10000151101	Antelope Valley_20220619	Antelope Valley	20220619	ND	-06	0	-1	0		34.3067	62.7996	9.41628	3.44954	69.0458	104.259	0.908905	0.0873063	6469	522.7	565.6	507.266	1.33993	1.33993
42	47.371	-101.836	590	2022-06-26 17:53:27	2022-06-26 11:53:27	Electricity Generation (1.A.1.a.i)	CO2	RMFa	[-101.837160, 47.367066, -101.832328, 47.371898]	GF5B	553.305	85.6232	6.59	0.0378594	318	281.346	16761.5	GF5B_AHSI_W102.1_N47.5_20220626_004263_L10000154923	Antelope Valley_20220626	Antelope Valley	20220626	ND	-06	0	1	1	能看见一点	41.323	44.3003	11.6599	4.22472	9.21328	20.2385	3.4221	0.0692062	6469	667	827.8	733.949	0.246126	-0.246126
43	47.3714	-101.834	590	2023-01-30 17:57:28	2023-01-30 11:57:28	Electricity Generation (1.A.1.a.i)	CO2	RMFa	[-101.844177, 47.367768, -101.836031, 47.376819]	GF5B	1115.49	183.882	4.48	0.661992	219	478.14	68129.7	GF5B_AHSI_W102.0_N47.5_20230130_007439_L10000282305	Antelope Valley_20230130	Antelope Valley	20230130	ND	-06	0	-1	0.7		64.3012	119.581	23.7625	3.51926	163.464	244.106	1.8277	0.0676563	6469	1034.6	1033.4	937.539	0.189802	0.189802
44	47.3714	-101.834	590	2024-06-23 17:57:48	2024-06-23 11:57:48	Electricity Generation (1.A.1.a.i)	CO2	RMFa	[-101.842603, 47.367919, -101.835652, 47.373964]	GF5B	852.407	208.699	2.28	0.395095	119	433.023	284041	GF5B_AHSI_W102.1_N47.5_20240623_014869_L10000537123	Antelope Valley_20240623	Antelope Valley	20240623	ND	-06	1	1	1		26.5254	182.173	13.4701	6.30682	152.954	116.245	0.401988	0.0836812	6469	1055.5	1045.9	949.26	0.10203	-0.10203
45	40.4627	-107.591	1939	2022-10-18 18:11:02	2022-10-18 11:11:02	Electricity Generation (1.A.1.a.i)	CO2	RMFa	[-107.593320, 40.451999, -107.548598, 40.487137]	GF5B	825.052	123.962	1.63	0.911281	281	2143.83	297999	GF5B_AHSI_W107.8_N40.7_20221018_005924_L10000222668	Craig_20221018	Craig	20221018	CO	-07	0	1	1	两个源	9.07654	114.885	6.52094	6.19764	4.11595	2.23633	1.5061	0.0565375	6021	830.6	831.6	753.674	0.0947061	0.0947061
46	40.4627	-107.591	1939	2023-09-26 18:12:39	2023-09-26 11:12:39	Electricity Generation (1.A.1.a.i)	CO2	RMFa	[-107.596528, 40.460441, -107.572172, 40.482187]	GF5B	719.974	109.897	1.1	0.943946	265	1409.69	263730	GF5B_AHSI_W107.5_N40.2_20230926_010921_L10000396892	Craig_20230926	Craig	20230926	CO	-07	0	-1	0.7		10.0318	99.8649	7.84655	7.27339	15.8608	5.81564	1.06515	0.05215	6021	761.2	909.1	717.384	0.00361077	0.00361077
47	40.4627	-107.591	1939	2024-01-13 18:13:26	2024-01-13 11:13:26	Electricity Generation (1.A.1.a.i)	CO2	RMFa	[-107.598263, 40.456196, -107.580838, 40.466651]	GF5B	755.962	204.446	2.08	0.161658	55	740.785	113629	GF5B_AHSI_W107.6_N40.7_20240113_012509_L10000452553	Craig_20240113	Craig	20240113	CO	-07	0	-1	0.7		22.8523	181.594	15.5445	7.11087	139.467	96.6971	1.87906	0.0431313	6021	1143.7	1144.1	1037.63	0.27145	-0.27145
48	36.69	-108.481	1630	2022-04-20 18:05:10	2022-04-20 11:05:10	Electricity Generation (1.A.1.a.i)	CO2	RMFa	[-108.492452, 36.678815, -108.457570, 36.694826]	GF5B	556.431	125.75	2.3	0.194679	272	1269.83	126679	GF5B_AHSI_W108.3_N36.7_20220420_003287_L10000117219	Four Corners Steam Elec Station_20220420	Four Corners Steam Elec Station	20220420	NM	-07	0	1	1	有排放	8.10589	117.644	4.45954	5.6311	162.158	124.321	1.3795	0.0774625	2442	539.3	621.1	495.429	0.12313	0.12313
49	36.69	-108.481	1630	2022-06-10 18:06:07	2022-06-10 11:06:07	Electricity Generation (1.A.1.a.i)	CO2	RMFa	[-108.497533, 36.656166, -108.440746, 36.693264]	GF5B	1187.19	198.858	2.97	0.766877	312	2061.58	394254	GF5B_AHSI_W108.2_N36.7_20220610_004030_L10000145798	Four Corners Steam Elec Station_20220610	Four Corners Steam Elec Station	20220610	NM	-07	0	1	1	完美	11.3431	187.514	5.2082	12.1307	1.06612	1.05546	1.88384	0.0724875	2442	1471.5	1052.86	1296.94	0.0846233	-0.0846233
50	36.69	-108.481	1630	2024-01-06 18:12:33	2024-01-06 11:12:33	Electricity Generation (1.A.1.a.i)	CO2	RMFa	[-108.514623, 36.671530, -108.460091, 36.695513]	GF5B	1066.78	167.569	1.32	0.358515	279	1618.06	423265	GF5B_AHSI_W108.3_N36.7_20240106_012407_L10000448627	Four Corners Steam Elec Station_20240106	Four Corners Steam Elec Station	20240106	NM	-07	0	-1	0.7		19.342	148.227	14.7564	7.18924	73.9211	32.5253	1.27556	0.0707125	2442	1357.4	1191	1201.22	0.111923	-0.111923
51	41.0808	-101.141	948	2021-12-20 17:37:21	2021-12-20 11:37:21	Electricity Generation (1.A.1.a.i)	CO2	RMFa	[-101.159898, 41.064950, -101.136559, 41.092665]	GF5B	542.688	74.1033	4.12	0.571781	29	1476.36	144529	GF5B_AHSI_W101.1_N41.2_20211220_001524_L10000044164	Gerald Gentleman Station_20211220	Gerald Gentleman Station	20211220	NE	-06	0	1	1		11.5891	62.5142	4.5211	4.70322	52.7262	72.4106	3.222	0.0158875	6077	1201.3	1283	1135.51	0.522074	-0.522074
52	41.0808	-101.141	948	2022-06-28 17:41:40	2022-06-28 11:41:40	Electricity Generation (1.A.1.a.i)	CO2	RMFa	[-101.192832, 41.079999, -101.133451, 41.130647]	GF5B	755.186	113.074	2	0.825611	177	2508.16	395598	GF5B_AHSI_W100.9_N41.2_20220628_004292_L10000156032	Gerald Gentleman Station_20220628	Gerald Gentleman Station	20220628	NE	-06	0	-1	0.7	24波段可见排放，有排放，但是算不准，靠近湖边	7.68848	105.385	4.44459	17.1369	32.5036	21.6691	2.10628	0.0338313	6077	1314.5	1320.1	1195.97	0.368555	-0.368555
53	35.2972	-101.748	1090	2022-04-24 17:38:35	2022-04-24 11:38:35	Electricity Generation (1.A.1.a.i)	CO2	RMFa	[-101.765816, 35.279579, -101.748199, 35.298332]	GF5B	333.809	38.6133	6.66	0.208407	41	839.644	30049.4	GF5B_AHSI_W101.9_N35.3_20220424_003345_L10000118254	Harrington Station_20220424	Harrington Station	20220424	TX	-06	0	-1	0.5		12.0777	26.5355	3.60894	3.80877	17.3811	38.586	2.07047	0.0448812	6193	296.2	292.8	266.755	0.251371	0.251371
54	35.2972	-101.748	1090	2024-01-10 17:45:52	2024-01-10 11:45:52	Electricity Generation (1.A.1.a.i)	CO2	RMFa	[-101.759525, 35.294277, -101.743067, 35.309032]	GF5B	427.087	49.2676	7	0.449592	272	836.051	37524.5	GF5B_AHSI_W101.9_N35.3_20240110_012465_L10000450920	Harrington Station_20240110	Harrington Station	20240110	TX	-06	0	-1	0.5		16.4267	32.841	5.2982	3.91079	173.128	403.966	0.858035	0.0435875	6193	152.9	152.8	138.641	2.08053	2.08053
55	35.2972	-101.748	1090	2024-03-01 17:44:39	2024-03-01 11:44:39	Electricity Generation (1.A.1.a.i)	CO2	RMFa	[-101.745656, 35.295347, -101.739973, 35.303303]	GF5B	178.419	32.5358	4.22	1.38121	275	417.608	9800.52	GF5B_AHSI_W101.7_N35.3_20240301_013208_L10000477342	Harrington Station_20240301	Harrington Station	20240301	TX	-06	0	-1	0		12.4088	20.127	4.33844	2.72328	126.922	178.537	1.53858	0.043975	6193	142.7	143.5	129.987	0.372584	0.372584
56	39.3844	-80.3325	299	2023-10-12 16:23:33	2023-10-12 11:23:33	Electricity Generation (1.A.1.a.i)	CO2	RMFa	[-80.340490, 39.379109, -80.326925, 39.389211]	GF5B	328	58.2544	0.73	0.046188	164	751.641	71210.2	GF5B_AHSI_W80.4_N39.2_20231012_011153_L10000404427	Harrison Power Station_20231012	Harrison Power Station	20231012	WV	-05	0	-1	0.5	伪排放	12.9158	45.3385	10.4307	8.12512	85.1864	20.7287	0.609874	0.0482375	3944	229.9	228.3	208.005	0.576883	0.576883
57	39.3844	-80.3325	299	2024-01-22 16:23:19	2024-01-22 11:23:19	Electricity Generation (1.A.1.a.i)	CO2	RMFa	[-80.381974, 39.352382, -80.326282, 39.391049]	GF5B	1291.81	318.992	2.15	0.710422	208	1820.97	465490	GF5B_AHSI_W80.4_N39.2_20240122_012639_L10000457433	Harrison Power Station_20240122	Harrison Power Station	20240122	WV	-05	0	-1	0.7		21.7176	297.275	11.8163	4.94378	158.589	113.655	1.44367	0.059925	3944	1467.2	1460.1	1328.55	0.0276594	-0.0276594
58	39.3844	-80.3325	299	2024-03-13 16:22:14	2024-03-13 11:22:14	Electricity Generation (1.A.1.a.i)	CO2	RMFa	[-80.338833, 39.380903, -80.290580, 39.405752]	GF5B	1012.15	201.693	2.58	0.134288	216	1745.14	307585	GF5B_AHSI_W80.2_N39.2_20240313_013382_L10000483618	Harrison Power Station_20240313	Harrison Power Station	20240313	WV	-05	0	-1	0.7		15.0087	186.685	6.76915	9.12878	19.8166	17.0423	1.52601	0.063475	3944	1067.4	1067.2	968.262	0.0453284	0.0453284
59	39.1747	-111.029	1725	2022-04-18 18:17:59	2022-04-18 11:17:59	Electricity Generation (1.A.1.a.i)	CO2	RMFa	[-111.083296, 39.163281, -111.010221, 39.192742]	GF5B	548.266	81.0352	0.6	0.175214	180	2273.28	374687	GF5B_AHSI_W110.9_N39.2_20220418_003258_L10000114473	Hunter_20220418	Hunter	20220418	UT	-07	0	-1	0.7	低风速	5.35668	75.6785	4.83366	8.91263	13.4743	2.69487	1.38639	0.0246625	6165	909.6	899.7	822.631	0.333521	-0.333521
60	39.1747	-111.029	1725	2024-01-04 18:25:25	2024-01-04 11:25:25	Electricity Generation (1.A.1.a.i)	CO2	RMFa	[-111.042589, 39.151062, -111.009106, 39.177329]	GF5B	476.242	74.6676	0.6	0.444672	180	1627.86	233061	GF5B_AHSI_W110.9_N39.2_20240104_012378_L10000447404	Hunter_20240104	Hunter	20240104	UT	-07	0	-1	0.5		8.9308	65.7368	8.45136	5.46714	165.365	33.0731	0.621232	0.0612625	6165	353.2	352.6	320.191	0.487368	0.487368
61	29.3091	-98.3205	149	2024-02-04 17:25:53	2024-02-04 11:25:53	Electricity Generation (1.A.1.a.i)	CO2	RMFa	[-98.328688, 29.302684, -98.308105, 29.314367]	GF5B	823.552	79.5979	8.28	0.922406	282	1120.29	90895.5	GF5B_AHSI_W98.2_N29.3_20240204_012829_L10000463990	J K Spruce_20240204	J K Spruce	20240204	TX	-06	0	-1	0.5		22.6288	56.9692	5.74055	4.03074	14.8911	41.0994	1.66267	0.032375	7097	534.5	536.5	485.646	0.695785	0.695785
62	29.3091	-98.3205	149	2024-02-11 17:27:36	2024-02-11 11:27:36	Electricity Generation (1.A.1.a.i)	CO2	RMFa	[-98.326427, 29.293447, -98.316967, 29.312644]	GF5B	572.067	71.1757	5.79	0.279702	339	905.152	58853.9	GF5B_AHSI_W98.6_N29.3_20240211_012931_L10000467494	J K Spruce_20240211	J K Spruce	20240211	TX	-06	0	-1	0.7		21.0023	50.1734	6.57198	4.23246	132.244	255.231	2.10701	0.0255125	7097	559.5	524.3	493.2	0.159908	0.159908
63	41.7378	-108.787	2044	2022-02-12 18:10:06	2022-02-12 11:10:06	Electricity Generation (1.A.1.a.i)	CO2	RMFa	[-108.793121, 41.736578, -108.774448, 41.750583]	GF5B	580.657	76.095	4.49	0.520288	249	836.048	61944.3	GF5B_AHSI_W108.8_N41.7_20220212_002311_L10000077220	Jim Bridger_20220212	Jim Bridger	20220212	WY	-07	0	-1	0.7	有排放，但周围噪声明显更大，不适合反演	13.9645	62.1305	5.57318	7.42357	82.6083	123.637	1.9531	0.0355562	8066	580.1	545	520.951	0.11461	0.11461
64	41.7378	-108.787	2044	2023-10-31 18:20:04	2023-10-31 11:20:04	Electricity Generation (1.A.1.a.i)	CO2	RMFa	[-108.791611, 41.735995, -108.749816, 41.757489]	GF5B	968.995	98.2069	6.01	0.413078	252	1593.75	172761	GF5B_AHSI_W109.0_N41.6_20231031_011431_L10000413197	Jim Bridger_20231031	Jim Bridger	20231031	WY	-07	0	-1	0.7		15.4779	82.729	5.20012	5.91716	48.6927	97.5477	2.78376	0.0386625	8066	1208.8	1174.8	1086.32	0.108005	-0.108005
65	41.7378	-108.787	2044	2023-12-21 18:20:37	2023-12-21 11:20:37	Electricity Generation (1.A.1.a.i)	CO2	RMFa	[-108.792518, 41.728167, -108.779946, 41.744929]	GF5B	538.433	97.4605	3.18	0.485386	242	877.079	582783	GF5B_AHSI_W109.1_N41.6_20231221_012174_L10000440228	Jim Bridger_20231221	Jim Bridger	20231221	WY	-07	0	1	1		18.23	79.2304	9.00885	4.16703	179.462	190.23	0.361222	0.0353	8066	994.7	868	864.063	0.376859	-0.376859
66	38.3472	-94.6467	263	2022-10-19 17:15:33	2022-10-19 11:15:33	Electricity Generation (1.A.1.a.i)	CO2	RMFa	[-94.647897, 38.339566, -94.589313, 38.355935]	GF5B	680.449	135.511	2.6	0.057735	272	1539.53	181497	GF5B_AHSI_W94.5_N38.2_20221019_005938_L10000223276	La Cygne_20221019	La Cygne	20221019	KS	-06	0	-1	0.7	32波段可见排放源	11.1117	124.399	4.68904	6.17089	160.896	139.443	1.51743	0.062575	1241	708.8	713.2	644.01	0.05658	0.05658
67	32.2597	-94.5703	98	2022-04-07 17:05:50	2022-04-07 11:05:50	Electricity Generation (1.A.1.a.i)	CO2	RMFa	[-94.575395, 32.255241, -94.558807, 32.281951]	GF5B	1230.24	130.463	6.16	0.576397	306	1165.76	158782	GF5B_AHSI_W94.5_N32.3_20220407_003097_L10000107611	Martin Lake_20220407	Martin Lake	20220407	TX	-06	0	-1	0.7		27.2524	103.211	7.24457	6.16338	36	73.92	2.72547	0.04465	6146	1469.4	1514	1336.39	0.0794306	-0.0794306
68	32.2597	-94.5703	98	2023-07-17 17:13:09	2023-07-17 11:13:09	Electricity Generation (1.A.1.a.i)	CO2	RMFa	[-94.571135, 32.256608, -94.536684, 32.291628]	GF5B	2375.92	308.46	3.97	0.223681	229	1843.1	594034	GF5B_AHSI_W94.5_N32.1_20230717_009886_L10000361780	Martin Lake_20230717	Martin Lake	20230717	TX	-06	1	-1	0.7		25.6093	282.851	8.59591	12.1552	9.10524	12.0493	1.98366	0.0505625	6146	2491.4	2702.3	2301.61	0.0322834	0.0322834
69	32.2597	-94.5703	98	2023-09-06 17:13:22	2023-09-06 11:13:22	Electricity Generation (1.A.1.a.i)	CO2	RMFa	[-94.577260, 32.251630, -94.514368, 32.292903]	GF5B	2066.16	379.539	2.72	0.502129	234	2691.38	935792	GF5B_AHSI_W94.4_N32.3_20230906_010629_L10000386730	Martin Lake_20230906	Martin Lake	20230906	TX	-06	0	-1	0.7		20.5406	358.998	8.60707	7.0624	13.9661	12.6626	1.93328	0.0471312	6146	2665.3	2675.5	2419.92	0.146186	-0.146186
70	32.2597	-94.5703	98	2023-11-03 17:12:54	2023-11-03 11:12:54	Electricity Generation (1.A.1.a.i)	CO2	RMFa	[-94.579683, 32.249187, -94.556639, 32.315229]	GF5B	1857.44	402.56	2.34	0.189033	160	2692.97	930858	GF5B_AHSI_W94.3_N32.3_20231103_011474_L10000414550	Martin Lake_20231103	Martin Lake	20231103	TX	-06	0	-1	0.7	有羽流，水面噪声大	18.0505	384.509	8.85384	7.24135	43.7926	34.1582	1.08483	0.0438562	6146	1488.1	1487.9	1349.95	0.375936	0.375936
71	32.2597	-94.5703	98	2024-02-13 17:13:08	2024-02-13 11:13:08	Electricity Generation (1.A.1.a.i)	CO2	RMFa	[-94.589192, 32.260461, -94.555766, 32.307651]	GF5B	1516.6	224.932	1.3	0.542433	203	2604.18	973458	GF5B_AHSI_W94.4_N32.3_20240213_012960_L10000468942	Martin Lake_20240213	Martin Lake	20240213	TX	-06	0	-1	0.7		14.2346	210.698	8.48216	5.53315	160.356	69.4876	0.740558	0.0434063	6146	1097.1	1103.7	996.57	0.521825	0.521825
72	32.2597	-94.5703	98	2024-04-04 17:12:16	2024-04-04 11:12:16	Electricity Generation (1.A.1.a.i)	CO2	RMFa	[-94.582585, 32.254100, -94.550820, 32.279681]	GF5B	1931.14	295.312	3.31	0.226053	273	1965.9	567949	GF5B_AHSI_W94.3_N32.3_20240404_013703_L10000494997	Martin Lake_20240404	Martin Lake	20240404	TX	-06	0	-1	0.7		22.3581	272.954	8.07561	11.6385	83.1185	91.7074	0.964197	0.0385187	6146	1103	1115	1002.8	0.925742	0.925742
73	32.2597	-94.5703	98	2024-06-01 17:13:43	2024-06-01 11:13:43	Electricity Generation (1.A.1.a.i)	CO2	RMFa	[-94.587019, 32.252474, -94.568788, 32.266217]	GF5B	892.693	143.169	1.53	0.051316	101	1117.47	232134	GF5B_AHSI_W94.8_N32.3_20240601_014548_L10000524560	Martin Lake_20240601	Martin Lake	20240601	TX	-06	1	-1	0.7		18.946	124.222	11.8033	7.4878	54.5608	27.826	0.782205	0.0466063	6146	647.8	634	584.962	0.52607	0.52607
74	31.185	-96.4853	129	2022-10-19 17:17:28	2022-10-19 11:17:28	Electricity Generation (1.A.1.a.i)	CO2	RMFa	[-96.509720, 31.130075, -96.485941, 31.184347]	GF5B	1772.67	260.588	1.55	0.104083	15	2132.65	875476	GF5B_AHSI_W96.5_N31.3_20221019_005938_L10000223290	Oak Grove_20221019	Oak Grove	20221019	TX	-06	0	-1	0.7	有排放	13.8796	246.708	7.2537	15.8966	46.2392	23.8903	1.10044	0.0297437	6180	1788.5	1803.2	1626.28	0.0900141	0.0900141
75	29.9172	-96.7506	115	2022-10-19 17:17:53	2022-10-19 11:17:53	Electricity Generation (1.A.1.a.i)	CO2	RMFa	[-96.762707, 29.878356, -96.747673, 29.917054]	GF5B	784.328	153.577	2.61	0.380175	32	1324.11	179481	GF5B_AHSI_W96.9_N29.8_20221019_005938_L10000223293	Sam Seymour_20221019	Sam Seymour	20221019	TX	-06	0	-1	0.7		10.8136	142.763	4.21751	6.32392	159.045	138.369	1.80046	0.0209875	6179	964.3	979	878.577	0.107274	-0.107274
76	37.1517	-88.775	105	2022-03-26 16:46:28	2022-03-26 10:46:28	Electricity Generation (1.A.1.a.i)	CO2	RMFa	[-88.783432, 37.146948, -88.767976, 37.162691]	GF5B	953.547	104.746	5.61	0.153948	292	963.453	105855	GF5B_AHSI_W88.6_N37.2_20220326_002922_L10000100107	Shawnee_20220326	Shawnee	20220326	KY	-06	0	-1	0.7	羽流飘到了水面上，水汽干扰大	19.1499	85.5964	5.23997	4.89353	162.744	304.331	1.80754	0.0356438	1379	811.401	780.998	714.945	0.333735	0.333735
77	37.1517	-88.775	105	2023-08-25 16:54:41	2023-08-25 10:54:41	Electricity Generation (1.A.1.a.i)	CO2	RMFa	[-88.791362, 37.148551, -88.764453, 37.170593]	GF5B	1040.72	210.97	2.61	0.346458	274	1311.97	235969	GF5B_AHSI_W88.7_N37.2_20230825_010454_L10000380643	Shawnee_20230825	Shawnee	20230825	KY	-06	0	-1	0.7	有排放，圆形，无羽流形状	21.5376	189.432	9.29026	8.03327	118.968	103.502	1.7678	0.0513438	1379	1266.6	1261.2	1144.63	0.0907811	-0.0907811
78	37.1517	-88.775	105	2023-12-12 16:54:21	2023-12-12 10:54:21	Electricity Generation (1.A.1.a.i)	CO2	RMFa	[-88.796158, 37.144607, -88.759933, 37.172068]	GF5B	704.981	109.436	1.77	0.140119	227	1811.19	280759	GF5B_AHSI_W88.6_N37.1_20231212_012042_L10000435322	Shawnee_20231212	Shawnee	20231212	KY	-06	0	-1	0.7	羽流飘到了水面上，水汽干扰大	11.1847	98.2509	6.29577	5.00747	129.473	76.3889	1.51108	0.0422063	1379	943.299	928	843.255	0.163977	-0.163977
79	45.3792	-93.8958	292	2022-06-02 17:19:01	2022-06-02 11:19:01	Electricity Generation (1.A.1.a.i)	CO2	RMFa	[-93.897237, 45.377273, -93.880238, 45.382045]	GF5B	475.963	70.3803	4.82	1.11862	265	552.724	32458.2	GF5B_AHSI_W94.2_N45.6_20220602_003913_L10000141558	Sherburne County_20220602	Sherburne County	20220602	MN	-06	0	-1	0.7		22.3348	48.0455	7.06757	3.53577	30.1974	48.5172	1.76659	0.036	6090	411.9	411.2	373.468	0.274439	0.274439
80	38.5847	-85.4117	144	2023-07-14 16:42:09	2023-07-14 11:42:09	Electricity Generation (1.A.1.a.i)	CO2	RMFa	[-85.414993, 38.571341, -85.372620, 38.593536]	GF5B	1277.14	195.766	1.52	0.269629	293	1471.36	357485	GF5B_AHSI_W85.3_N38.7_20230714_009842_L10000360353	Trimble County_20230714	Trimble County	20230714	KY	-05	0	1	1		18.0566	177.709	10.5955	7.88359	16.7804	8.50206	1.44312	0.052025	6071	1373.5	1399.05	1262.24	0.0118058	0.0118058
81	38.5847	-85.4117	144	2023-10-31 16:42:01	2023-10-31 11:42:01	Electricity Generation (1.A.1.a.i)	CO2	RMFa	[-85.421111, 38.578944, -85.400656, 38.589316]	GF5B	899.263	155.126	3.2	0.365103	250	848.434	116364	GF5B_AHSI_W85.2_N38.7_20231031_011430_L10000413176	Trimble County_20231031	Trimble County	20231031	KY	-05	0	-1	0.5	探测到了，但算的不准（该案例说明GF5的探测下限达到256t/h, 3m/s）	23.6387	131.487	8.979	5.94026	42.1526	44.9628	0.519885	0.048225	6071	278.2	284.99	256.691	2.50329	2.50329
82	34.4236	-92.1392	93	2023-10-06 17:05:59	2023-10-06 11:05:59	Electricity Generation (1.A.1.a.i)	CO2	RMFa	[-92.144386, 34.419821, -92.139024, 34.428287]	GF5B	461.831	103.092	2.8	0.356978	35	455.438	34754.9	GF5B_AHSI_W92.2_N34.3_20231006_011066_L10000401605	White Bluff_20231006	White Bluff	20231006	AR	-06	0	-1	0.5		25.3736	77.7181	12.0632	4.84143	60.1416	56.1322	1.07325	0.0541813	6009	320	380.1	294.843	0.566363	0.566363
83	47.371	-101.836	590	2020-11-23 18:05:58	2020-11-23 12:05:58	Electricity Generation (1.A.1.a.i)	CO2	RMFa	[-101.846555, 47.374787, -101.838317, 47.386511]	ZY1E	391.914	51.0767	6.44	0.18735	144	616.211	26249.2	ZY1E_AHSI_W101.95_N47.64_20201123_006296_L1A0000193277	Antelope Valley_20201123	Antelope Valley	20201123	ND	-06	0	-1	0.7	这一景还是不太好反演	19.1999	31.8768	6.74546	8.24866	27.1087	58.1933	2.20143	0.0541688	6469	372.7	365.9	337.594	0.160905	0.160905
84	40.4627	-107.591	1939	2023-07-15 18:14:00	2023-07-15 11:14:00	Electricity Generation (1.A.1.a.i)	CO2	RMFa	[-107.592094, 40.461049, -107.549321, 40.483315]	ZY1E	1064.54	193.017	2.81	0.76173	274	1456.3	255595	ZY1E_AHSI_W107.63_N40.60_20230715_020127_L1A0000628485	Craig_20230715	Craig	20230715	CO	-07	0	-1	0.7	19波段较好	14.5695	178.448	7.08408	7.48529	173.007	162.05	1.28499	0.0421625	6021	892.4	903.4	811.9	0.311176	0.311176
85	40.4627	-107.591	1939	2023-10-07 18:11:00	2023-10-07 11:11:00	Electricity Generation (1.A.1.a.i)	CO2	RMFa	[-107.594438, 40.459166, -107.574226, 40.471762]	ZY1E	447.58	74.1459	1.36	0.706329	287	870.662	94588.8	ZY1E_AHSI_W107.47_N40.60_20231007_021332_L1A0000663395	Craig_20231007	Craig	20231007	CO	-07	0	-1	0.7	有排放 不像羽流	11.9371	62.2088	8.62926	3.78147	3.93013	1.78166	1.14322	0.0556	6021	487.2	518.1	447.12	0.00102939	0.00102939
86	36.69	-108.481	1630	2020-09-17 18:19:28	2020-09-17 11:19:28	Electricity Generation (1.A.1.a.i)	CO2	RMFa	[-108.530196, 36.685677, -108.476997, 36.724670]	ZY1E	1231.46	224.301	2.71	0.885042	176	2736.63	568451	ZY1E_AHSI_W108.64_N36.61_20200917_005334_L1A0000154763	Four Corners Steam Elec Station_20200917	Four Corners Steam Elec Station	20200917	NM	-07	0	-1	0.7	羽流形状好	9.45446	214.846	4.29812	7.92858	72.6146	65.5951	1.82834	0.07115	2442	1507.6	1506	1367.21	0.0992945	-0.0992945
87	36.69	-108.481	1630	2023-10-07 18:12:07	2023-10-07 11:12:07	Electricity Generation (1.A.1.a.i)	CO2	RMFa	[-108.538679, 36.681934, -108.475404, 36.736580]	ZY1E	956.879	140.306	1.7	1.14006	130	2735.8	487396	ZY1E_AHSI_W108.72_N36.61_20231007_021332_L1A0000663404	Four Corners Steam Elec Station_20231007	Four Corners Steam Elec Station	20231007	NM	-07	0	1	1	羽流很完整，可以作为案例	7.00593	133.3	4.46398	11.5273	16.8391	9.54215	2.16107	0.075475	2442	1532.3	1509.9	1386.01	0.309619	-0.309619
88	36.3156	-86.4006	140	2022-03-27 16:51:51	2022-03-27 10:51:51	Electricity Generation (1.A.1.a.i)	CO2	RMFa	[-86.404690, 36.310102, -86.395635, 36.318252]	ZY1E	249.226	68.8569	2.48	0.176163	317	406.808	18126.8	ZY1E_AHSI_W86.17_N36.17_20220327_013308_L1A0000425155	Gallatin_20220327	Gallatin	20220327	TN	-06	0	-1	0.5		20.7288	48.128	8.88252	2.63891	76.3407	63.1083	1.73331	0.027275	3403	307	306.4	278.043	0.103641	-0.103641
89	36.3156	-86.4006	140	2022-10-04 16:51:33	2022-10-04 10:51:33	Electricity Generation (1.A.1.a.i)	CO2	RMFa	[-86.414187, 36.309572, -86.400122, 36.323925]	ZY1E	699.308	116.102	1.48	0.200333	28	999.213	164603	ZY1E_AHSI_W86.59_N36.17_20221004_016048_L1A0000511602	Gallatin_20221004	Gallatin	20221004	TN	-06	0	-1	0.7	像伪排放源	18.8231	97.2791	11.0705	6.86821	121.249	59.8162	1.16786	0.0308563	3403	758.6	764.3	692.586	0.00970678	0.00970678
90	41.0808	-101.141	948	2023-08-05 17:48:20	2023-08-05 11:48:20	Electricity Generation (1.A.1.a.i)	CO2	RMFa	[-101.144645, 41.075996, -101.115866, 41.084512]	ZY1E	1685.28	182.906	6.02	0.531162	275	899.518	169465	ZY1E_AHSI_W101.24_N41.04_20230805_020428_L1A0000637084	Gerald Gentleman Station_20230805	Gerald Gentleman Station	20230805	NE	-06	0	-1	0.7		39.1947	143.712	11.8798	9.14549	18.938	38.0022	1.81562	0.0268563	6077	1358.5	1357.1	1231.39	0.368594	0.368594
91	35.2972	-101.748	1090	2022-03-05 17:52:24	2022-03-05 11:52:24	Electricity Generation (1.A.1.a.i)	CO2	RMFa	[-101.750338, 35.296227, -101.743117, 35.302846]	ZY1E	188.817	26.903	10.76	0.244404	253	440.106	7459.14	ZY1E_AHSI_W101.46_N35.28_20220305_012995_L1A0000414997	Harrington Station_20220305	Harrington Station	20220305	TX	-06	0	-1	0	排放强度太低了，无法检测到	15.6339	11.2691	3.98017	4.47605	131.341	471.076	2.61613	0.0379875	6193	167.2	177.3	159.622	0.182902	0.182902
92	35.2972	-101.748	1090	2022-03-31 17:54:08	2022-03-31 11:54:08	Electricity Generation (1.A.1.a.i)	CO2	RMFa	[-101.749115, 35.282484, -101.713300, 35.302046]	ZY1E	658.269	72.7401	5.28	0.730821	295	1371.99	116967	ZY1E_AHSI_W101.95_N35.28_20220331_013368_L1A0000427095	Harrington Station_20220331	Harrington Station	20220331	TX	-06	0	1	1		10.8857	61.8544	3.30953	6.70016	8.95617	15.7629	1.88885	0.0470625	6193	641.9	638.7	579.709	0.135516	0.135516
93	39.1747	-111.029	1725	2020-09-05 18:32:32	2020-09-05 11:32:32	Electricity Generation (1.A.1.a.i)	CO2	RMFa	[-111.064226, 39.172978, -111.025169, 39.223325]	ZY1E	906.792	136.597	1.91	0.331512	137	1785.98	345015	ZY1E_AHSI_W111.31_N39.27_20200905_005163_L1A0000144224	Hunter_20200905	Hunter	20200905	UT	-07	0	-1	0.7	有羽流	10.1179	126.479	6.02183	7.70073	48.6635	30.9824	1.54536	0.00791875	6165	1057.9	1295.6	1074.72	0.156251	-0.156251
94	39.1747	-111.029	1725	2020-10-04 18:32:36	2020-10-04 11:32:36	Electricity Generation (1.A.1.a.i)	CO2	RMFa	[-111.040303, 39.172439, -111.018027, 39.200207]	ZY1E	739.533	182.795	2.13	0.147309	131	1481.37	218046	ZY1E_AHSI_W111.21_N39.27_20201004_005578_L1A0000168618	Hunter_20201004	Hunter	20201004	UT	-07	0	1	1	完美	10.5521	172.243	6.05902	6.46679	52.1185	37.0041	1.14646	0.0165812	6165	656	681.6	607.499	0.21734	0.21734
95	29.3091	-98.3205	149	2020-09-30 17:33:03	2020-09-30 11:33:03	Electricity Generation (1.A.1.a.i)	CO2	RMFa	[-98.322927, 29.305711, -98.287392, 29.349242]	ZY1E	1337.02	215.389	3.18	0.105987	224	1924.98	393958	ZY1E_AHSI_W98.50_N29.51_20200930_005521_L1A0000170469	J K Spruce_20200930	J K Spruce	20200930	TX	-06	0	-1	0.7		18.6468	196.742	6.859	8.92399	114.827	121.716	1.15586	0.0273688	7097	914.9	958.2	851.588	0.570026	0.570026
96	29.3091	-98.3205	149	2020-10-29 17:33:12	2020-10-29 11:33:12	Electricity Generation (1.A.1.a.i)	CO2	RMFa	[-98.321909, 29.284365, -98.302392, 29.311570]	ZY1E	610.979	70.7275	7.17	0.072111	337	867.891	37675.9	ZY1E_AHSI_W98.51_N29.06_20201029_005935_L1A0000194928	J K Spruce_20201029	J K Spruce	20201029	TX	-06	0	1	1	有团块排放	24.478	46.2495	6.41848	5.10314	28.6926	68.5753	3.13082	0.0222437	7097	508.1	564.9	489.281	0.248728	0.248728
97	29.3091	-98.3205	149	2022-04-18 17:33:49	2022-04-18 11:33:49	Electricity Generation (1.A.1.a.i)	CO2	RMFa	[-98.328761, 29.302490, -98.317835, 29.311455]	ZY1E	603.09	69.5556	6.44	0.0378594	42	659.678	43242.4	ZY1E_AHSI_W98.20_N29.06_20220418_013626_L1A0000435959	J K Spruce_20220418	J K Spruce	20220418	TX	-06	0	-1	0.7		20.5024	49.0531	5.72646	6.84472	170.742	366.526	2.41802	0.0274688	7097	629.1	628.9	570.61	0.0569221	0.0569221
98	29.3091	-98.3205	149	2022-05-14 17:35:16	2022-05-14 11:35:16	Electricity Generation (1.A.1.a.i)	CO2	RMFa	[-98.328823, 29.304021, -98.289564, 29.356740]	ZY1E	1598.23	389.185	2.12	0.744737	188	2187.28	699108	ZY1E_AHSI_W98.53_N29.51_20220514_013997_L1A0000447750	J K Spruce_20220514	J K Spruce	20220514	TX	-06	0	-1	0.7		14.6719	374.513	7.20897	10.8114	24.8767	17.5795	0.81807	0.0294188	7097	1041	1035.2	941.31	0.697883	0.697883
99	29.3091	-98.3205	149	2022-09-30 17:31:53	2022-09-30 11:31:53	Electricity Generation (1.A.1.a.i)	CO2	RMFa	[-98.350328, 29.275908, -98.313315, 29.314042]	ZY1E	1615.29	239.117	1.61	0.0984886	83	2437.21	898637	ZY1E_AHSI_W98.07_N29.51_20220930_015991_L1A0000509878	J K Spruce_20220930	J K Spruce	20220930	TX	-06	0	-1	0.7	有噪声，有羽流	14.2236	224.893	8.07928	14.2642	40.4718	21.7199	1.02535	0.0173875	7097	1501.1	1499.5	1361.03	0.186815	0.186815
100	41.7378	-108.787	2044	2020-08-13 18:24:46	2020-08-13 11:24:46	Electricity Generation (1.A.1.a.i)	CO2	RMFa	[-108.788696, 41.735285, -108.739362, 41.756252]	ZY1E	863.347	91.0255	5.41	0.911062	254	1473.72	148957	ZY1E_AHSI_W108.78_N41.92_20200813_004832_L1A0000126505	Jim Bridger_20200813	Jim Bridger	20200813	WY	-07	0	-1	0.7	羽流形状很好，不过怎么风速有点问题	11.3898	79.6357	3.85474	8.25923	33.8276	61.0024	4.48162	0.0555812	8066	1902.1	1640.8	1630.74	0.470579	-0.470579
101	41.7378	-108.787	2044	2020-09-11 18:24:53	2020-09-11 11:24:53	Electricity Generation (1.A.1.a.i)	CO2	RMFa	[-108.798241, 41.729702, -108.726378, 41.749441]	ZY1E	1607.26	141.681	7.11	0.170392	256	1990.88	334207	ZY1E_AHSI_W108.68_N41.92_20200911_005248_L1A0000148906	Jim Bridger_20200911	Jim Bridger	20200911	WY	-07	0	-1	0.7	排放位置在山上，不像排放源	19.3472	122.333	6.09276	6.85083	64.0552	151.811	2.08389	0.063525	8066	1437.4	1314.4	1259.35	0.276257	0.276257
102	38.3472	-94.6467	263	2020-07-11 17:23:19	2020-07-11 11:23:19	Electricity Generation (1.A.1.a.i)	CO2	RMFa	[-94.648627, 38.339054, -94.611004, 38.356708]	ZY1E	1818.18	344.287	2.72	0.231805	287	1401.32	266508	ZY1E_AHSI_W94.49_N38.38_20200711_004357_L1A0000107667	La Cygne_20200711	La Cygne	20200711	KS	-06	0	1	1	反演效果不好，只有一团排放；感觉有点像是把水汽也核算进去了，偏高很多；误差太大了	28.3763	315.911	12.4145	13.269	11.9465	10.8315	2.12016	0.0438062	1241	1601.4	1598	1451.58	0.25255	0.25255
103	38.3472	-94.6467	263	2021-09-13 17:27:32	2021-09-13 11:27:32	Electricity Generation (1.A.1.a.i)	CO2	RMFa	[-94.647928, 38.346809, -94.642452, 38.357761]	ZY1E	608.6	92.5033	5.41	0.230072	196	502.932	35834.6	ZY1E_AHSI_W94.44_N38.38_20210913_010511_L1A0000334632	La Cygne_20210913	La Cygne	20210913	KS	-06	0	-1	0.7		36.3656	56.1377	11.7195	6.30529	58.2414	105.029	2.35679	0.044475	1241	662.6	671	604.53	0.00673264	0.00673264
104	38.3472	-94.6467	263	2021-12-06 17:27:03	2021-12-06 11:27:03	Electricity Generation (1.A.1.a.i)	CO2	RMFa	[-94.647965, 38.345567, -94.641853, 38.350457]	ZY1E	336.752	57.1481	4.78	0.30315	340	411.378	17158.7	ZY1E_AHSI_W94.33_N38.38_20211206_011716_L1A0000374910	La Cygne_20211206	La Cygne	20211206	KS	-06	0	-1	0.5		22.9255	34.2225	7.21236	5.56317	167.762	267.301	2.41862	0.0279125	1241	365.5	442.9	363.173	0.0727522	-0.0727522
105	38.5583	-90.8361	146	2021-09-25 17:13:23	2021-09-25 11:13:23	Electricity Generation (1.A.1.a.i)	CO2	RMFa	[-90.842451, 38.545736, -90.811985, 38.572241]	ZY1E	1626.66	287.495	2.94	0.581292	280	1627.01	424379	ZY1E_AHSI_W90.79_N38.83_20210925_010683_L1A0000340283	Labadie_20210925	Labadie	20210925	MO	-06	0	-1	0.7		27.7882	259.707	11.5916	6.73284	34.8007	34.1047	1.68449	0.0544063	2103	1746.6	1732.6	1581.74	0.028398	0.028398
106	38.5583	-90.8361	146	2022-01-13 17:13:19	2022-01-13 11:13:19	Electricity Generation (1.A.1.a.i)	CO2	RMFa	[-90.846636, 38.497453, -90.823816, 38.557089]	ZY1E	1038.07	162.307	1.73	0.289194	280	1904.85	438820	ZY1E_AHSI_W90.90_N38.38_20220113_012261_L1A0000391512	Labadie_20220113	Labadie	20220113	MO	-06	0	-1	0.7		17.6688	144.638	10.1099	4.99246	124.135	71.5845	2.01621	0.041875	2103	1841.4	1849.6	1672.1	0.379181	-0.379181
107	38.5583	-90.8361	146	2023-03-29 17:07:56	2023-03-29 11:07:56	Electricity Generation (1.A.1.a.i)	CO2	RMFa	[-90.840681, 38.561619, -90.778336, 38.614105]	ZY1E	1714.52	250.829	1.58	0.291433	235	2449.92	951184	ZY1E_AHSI_W90.98_N38.38_20230329_018573_L1A0000585856	Labadie_20230329	Labadie	20230329	MO	-06	0	1	1	羽流沿着江面规整陈列	12.1661	238.663	6.56925	6.16419	4.01467	2.11439	1.59874	0.0442688	2103	2464.5	2453.2	2234.56	0.232726	-0.232726
108	42.1103	-104.883	1393	2020-08-25 18:10:51	2020-08-25 11:10:51	Electricity Generation (1.A.1.a.i)	CO2	RMFa	[-104.897530, 42.103682, -104.878370, 42.121606]	ZY1E	595.07	100.296	3.13	0.629788	287	1173.02	107835	ZY1E_AHSI_W105.13_N42.36_20200825_005004_L1A0000136593	Laramie River_20200825	Laramie River	20200825	WY	-07	0	-1	0.7		11.3027	88.9929	4.79727	8.03571	168.65	175.959	1.42633	0.0381063	6204	520.3	520.5	472.038	0.260639	0.260639
109	42.1103	-104.883	1393	2023-06-25 18:05:08	2023-06-25 11:05:08	Electricity Generation (1.A.1.a.i)	CO2	RMFa	[-104.886549, 42.108139, -104.862067, 42.128197]	ZY1E	1049.91	217.554	2.52	0.25697	97	1100.85	162164	ZY1E_AHSI_W104.93_N41.92_20230625_019840_L1A0000620580	Laramie River_20230625	Laramie River	20230625	WY	-07	0	1	1	有排放	18.5649	198.989	9.33602	10.1331	127.53	107.125	1.79508	0.066525	6204	1043.4	1114.7	951.947	0.10291	0.10291
110	42.1103	-104.883	1393	2023-09-17 18:02:08	2023-09-17 11:02:08	Electricity Generation (1.A.1.a.i)	CO2	RMFa	[-104.887364, 42.108374, -104.857581, 42.122528]	ZY1E	1424.9	131.126	7.79	0.59808	261	1128.18	162056	ZY1E_AHSI_W104.76_N41.92_20230917_021045_L1A0000655064	Laramie River_20230917	Laramie River	20230917	WY	-07	0	-1	0.7	羽流良好	28.8072	102.319	7.82748	4.10036	172.107	446.905	2.93717	0.0451063	6204	1667.1	1881.6	1518.85	0.0618569	-0.0618569
111	32.2597	-94.5703	98	2021-01-04 17:21:40	2021-01-04 11:21:40	Electricity Generation (1.A.1.a.i)	CO2	RMFa	[-94.571779, 32.232940, -94.517503, 32.269920]	ZY1E	1144.46	176.302	1.96	0.0416333	285	2488.65	600090	ZY1E_AHSI_W94.77_N32.17_20210104_006896_L1A0000221658	Martin Lake_20210104	Martin Lake	20210104	TX	-06	0	-1	0.7	水汽干扰大，几乎无反演结果	16.6279	159.674	9.02415	4.77836	41.2087	26.923	1.39234	0.0507375	6146	1286	1418.3	1208.65	0.0531026	-0.0531026
112	32.2597	-94.5703	98	2021-04-01 17:20:59	2021-04-01 11:20:59	Electricity Generation (1.A.1.a.i)	CO2	RMFa	[-94.594071, 32.238930, -94.567832, 32.260994]	ZY1E	986.936	174.124	3.06	0.725465	38	1090.45	168482	ZY1E_AHSI_W94.40_N32.17_20210401_008144_L1A0000261751	Martin Lake_20210401	Martin Lake	20210401	TX	-06	0	-1	0.7	有羽流	23.0409	151.083	8.69338	6.06083	171.651	175.084	1.94247	0.04435	6146	1201.3	1170.4	1080.46	0.0865568	-0.0865568
113	32.2597	-94.5703	98	2022-03-03 17:22:15	2022-03-03 11:22:15	Electricity Generation (1.A.1.a.i)	CO2	RMFa	[-94.606540, 32.259023, -94.565099, 32.319247]	ZY1E	1160.62	171.553	0.58	0.17088	239	2710.89	951833	ZY1E_AHSI_W94.59_N32.17_20220303_012967_L1A0000414108	Martin Lake_20220303	Martin Lake	20220303	TX	-06	0	-1	0.7	这一景本应该能够看到完美羽流的，但是羽流的方向刚好经过了湖面，导致出现一段非常大的异常高值	11.3864	160.166	7.87856	7.01141	15.7014	3.0356	1.3324	0.0434438	6146	1866.9	1838.5	1684.18	0.31087	-0.31087
114	31.185	-96.4853	129	2020-06-12 17:25:12	2020-06-12 11:25:12	Electricity Generation (1.A.1.a.i)	CO2	RMFa	[-96.503365, 31.171179, -96.485253, 31.183631]	ZY1E	1793.96	243.484	4	0.183303	53	889.826	215712	ZY1E_AHSI_W96.74_N31.10_20200612_003941_L1A0000093912	Oak Grove_20200612	Oak Grove	20200612	TX	-06	0	-1	0.7	排放羽流很清晰	31.3494	212.135	10.8662	9.96656	13.825	18.4333	1.83005	0.0377062	6180	1759.1	1762.5	1597.11	0.12325	0.12325
115	31.185	-96.4853	129	2020-07-11 17:25:19	2020-07-11 11:25:19	Electricity Generation (1.A.1.a.i)	CO2	RMFa	[-96.497545, 31.180464, -96.467103, 31.227538]	ZY1E	1829.19	285.853	3.26	0.733848	207	1795.52	343015	ZY1E_AHSI_W96.58_N31.29_20200711_004359_L1A0000107694	Oak Grove_20200711	Oak Grove	20200711	TX	-06	0	1	1	羽流可以	23.3528	262.5	8.55839	12.7114	2.72311	2.95911	2.46944	0.0343313	6180	1869.6	1875.6	1698.34	0.0770449	0.0770449
116	31.185	-96.4853	129	2020-10-06 17:25:38	2020-10-06 11:25:38	Electricity Generation (1.A.1.a.i)	CO2	RMFa	[-96.498519, 31.179168, -96.464917, 31.228828]	ZY1E	1626.46	245.634	1.93	0.527162	201	2725.29	940116	ZY1E_AHSI_W96.26_N31.29_20201006_005607_L1A0000169633	Oak Grove_20201006	Oak Grove	20201006	TX	-06	0	-1	0.7	有排放，无羽流	18.7503	226.883	10.1058	9.63766	2.98368	1.9195	1.37072	0.0304312	6180	1874.4	1879.2	1702.24	0.0445196	-0.0445196
117	31.185	-96.4853	129	2021-04-24 17:27:56	2021-04-24 11:27:56	Electricity Generation (1.A.1.a.i)	CO2	RMFa	[-96.493105, 31.145604, -96.470205, 31.183970]	ZY1E	1319.53	140.433	5.95	0.369098	340	1685.88	249918	ZY1E_AHSI_W96.28_N31.29_20210424_008474_L1A0000271419	Oak Grove_20210424	Oak Grove	20210424	TX	-06	0	-1	0.7	偏高	26.9638	113.47	7.9842	9.80798	170.486	338.13	1.52461	0.0375562	6180	893.6	900.9	813.64	0.621766	0.621766
118	31.185	-96.4853	129	2021-12-06 17:29:06	2021-12-06 11:29:06	Electricity Generation (1.A.1.a.i)	CO2	RMFa	[-96.496021, 31.141122, -96.483528, 31.182469]	ZY1E	1563.13	147.396	7.76	0.252389	7	1488.26	234862	ZY1E_AHSI_W96.41_N31.29_20211206_011716_L1A0000374926	Oak Grove_20211206	Oak Grove	20211206	TX	-06	0	-1	0.7	有一点点羽流	34.8814	112.515	9.23102	5.79687	153.353	396.672	2.86559	0.0217938	6180	1798.7	1790.1	1627.98	0.0398361	-0.0398361
119	31.185	-96.4853	129	2022-01-30 17:28:05	2022-01-30 11:28:05	Electricity Generation (1.A.1.a.i)	CO2	RMFa	[-96.490442, 31.176617, -96.449693, 31.212608]	ZY1E	1209.23	147.767	4.62	0.316596	231	1714.12	260893	ZY1E_AHSI_W96.19_N31.29_20220130_012507_L1A0000399543	Oak Grove_20220130	Oak Grove	20220130	TX	-06	0	-1	0.7		21.412	126.355	6.56105	8.29032	81.7044	125.825	2.31354	0.0190875	6180	1396	1398.9	1267.66	0.0460883	-0.0460883
120	31.185	-96.4853	129	2022-03-26 17:27:55	2022-03-26 11:27:55	Electricity Generation (1.A.1.a.i)	CO2	RMFa	[-96.493738, 31.178648, -96.479163, 31.210475]	ZY1E	959.816	153.893	3.3	1.15117	180	1592.27	229025	ZY1E_AHSI_W96.23_N31.29_20220326_013296_L1A0000424559	Oak Grove_20220326	Oak Grove	20220326	TX	-06	0	-1	0.7		17.82	136.073	6.50166	8.25263	8.57102	9.42812	1.39814	0.0251563	6180	767.3	835.6	723.965	0.325777	0.325777
121	29.9172	-96.7506	115	2020-06-12 17:25:31	2020-06-12 11:25:31	Electricity Generation (1.A.1.a.i)	CO2	RMFa	[-96.771010, 29.899329, -96.749111, 29.917016]	ZY1E	1324.58	191.667	3.64	0.0757188	53	1039.63	400344	ZY1E_AHSI_W97.05_N29.95_20200612_003941_L1A0000093915	Sam Seymour_20200612	Sam Seymour	20200612	TX	-06	0	1	1	羽流形状很好，可以作为案例	20.8864	170.781	7.02538	14.8897	15.4617	18.7602	0.986308	0.02765	6179	1467.5	1562.8	1367.32	0.0312526	-0.0312526
122	29.9172	-96.7506	115	2020-07-11 17:25:42	2020-07-11 11:25:42	Electricity Generation (1.A.1.a.i)	CO2	RMFa	[-96.757181, 29.911699, -96.713075, 29.973222]	ZY1E	1511.16	266.768	2.82	0.305123	203	2479.75	616446	ZY1E_AHSI_W96.95_N29.95_20200711_004359_L1A0000107697	Sam Seymour_20200711	Sam Seymour	20200711	TX	-06	0	-1	0.7	有羽流，还不错，飘到水面上了，前16波段清晰；作为强吸收和弱吸收的案例	14.4339	252.334	5.88557	16.3008	31.2127	29.3399	1.83108	0.0312375	6179	1793.1	1824.9	1638.69	0.0778271	-0.0778271
123	29.9172	-96.7506	115	2021-04-24 17:28:19	2021-04-24 11:28:19	Electricity Generation (1.A.1.a.i)	CO2	RMFa	[-96.751427, 29.866208, -96.726228, 29.916608]	ZY1E	1232.42	126.627	6.15	0.410041	338	1709.34	233390	ZY1E_AHSI_W96.65_N29.95_20210424_008474_L1A0000271422	Sam Seymour_20210424	Sam Seymour	20210424	TX	-06	0	-1	0.7		23.1146	103.512	6.35861	5.84304	167.454	343.281	2.02437	0.0373	6179	1037.5	1164.7	995.055	0.238543	0.238543
124	29.9172	-96.7506	115	2022-01-30 17:28:28	2022-01-30 11:28:28	Electricity Generation (1.A.1.a.i)	CO2	RMFa	[-96.751281, 29.915041, -96.712146, 29.955955]	ZY1E	1153.12	207.122	2.83	0.533292	238	2202.82	416944	ZY1E_AHSI_W96.55_N29.95_20220130_012507_L1A0000399546	Sam Seymour_20220130	Sam Seymour	20220130	TX	-06	0	-1	0.7		15.3135	191.808	6.02584	8.63763	13.4658	12.7027	1.85425	0.0214875	6179	1394.8	1390.4	1263.48	0.0873428	-0.0873428
125	29.9172	-96.7506	115	2022-03-26 17:28:17	2022-03-26 11:28:17	Electricity Generation (1.A.1.a.i)	CO2	RMFa	[-96.756139, 29.915677, -96.698627, 29.976450]	ZY1E	1556.98	204.619	3.98	0.457857	205	2668.63	562913	ZY1E_AHSI_W96.59_N29.95_20220326_013296_L1A0000424562	Sam Seymour_20220326	Sam Seymour	20220326	TX	-06	0	-1	0.7	能看到排放，但羽流飘到了湖面上	19.6803	184.939	6.42993	10.7321	31.147	41.3217	2.11377	0.083525	6179	1765.4	1773.9	1605.14	0.0300071	-0.0300071
126	37.1517	-88.775	105	2020-12-21 17:03:04	2020-12-21 11:03:04	Electricity Generation (1.A.1.a.i)	CO2	RMFa	[-88.780400, 37.147685, -88.771925, 37.155555]	ZY1E	448.296	59.9145	6.44	0.140475	244	638.525	31112.7	ZY1E_AHSI_W89.08_N37.06_20201221_006696_L1A0000212411	Shawnee_20201221	Shawnee	20201221	KY	-06	0	-1	0.5		23.4518	36.4627	7.25866	6.01712	63.6169	136.564	2.00085	0.0404813	1379	386.9	386.599	350.976	0.277283	0.277283
127	37.1517	-88.775	105	2021-01-19 17:02:53	2021-01-19 11:02:53	Electricity Generation (1.A.1.a.i)	CO2	RMFa	[-88.801516, 37.139358, -88.768516, 37.169936]	ZY1E	573.657	93.776	1.57	0.105987	333	1331.43	232107	ZY1E_AHSI_W88.95_N37.06_20210119_007111_L1A0000229838	Shawnee_20210119	Shawnee	20210119	KY	-06	0	1	1	右下角伪排放源	13.9276	79.8484	8.1857	4.2641	150.271	78.6416	1.24584	0.0245437	1379	868.501	669.401	781.87	0.266301	-0.266301
128	37.1517	-88.775	105	2021-11-28 17:03:59	2021-11-28 11:03:59	Electricity Generation (1.A.1.a.i)	CO2	RMFa	[-88.785906, 37.143676, -88.767442, 37.159719]	ZY1E	404.541	73.9297	3.51	0.18037	340	721.002	42233.6	ZY1E_AHSI_W88.87_N37.06_20211128_011601_L1A0000371189	Shawnee_20211128	Shawnee	20211128	KY	-06	0	-1	0.7	有排放	19.9358	53.9939	7.52683	5.73959	129.867	151.944	1.74834	0.0540062	1379	406.4	406.4	368.68	0.0972691	0.0972691
129	45.3792	-93.8958	292	2022-03-20 17:31:14	2022-03-20 11:31:14	Electricity Generation (1.A.1.a.i)	CO2	RMFa	[-93.901589, 45.377468, -93.872751, 45.413516]	ZY1E	917.986	151.085	1.91	0.665307	133	1387.59	271362	ZY1E_AHSI_W93.56_N45.45_20220320_013210_L1A0000421897	Sherburne County_20220320	Sherburne County	20220320	MN	-06	0	-1	0.7		23.0447	128.04	12.7121	5.36997	10.6585	6.78592	1.77675	0.0484687	6090	1451.2	1311.2	1250.89	0.266132	-0.266132
130	45.3792	-93.8958	292	2022-09-27 17:31:08	2022-09-27 11:31:08	Electricity Generation (1.A.1.a.i)	CO2	RMFa	[-93.901165, 45.344382, -93.872597, 45.383475]	ZY1E	1622.25	259.526	3.34	0.267644	351	1534.03	370404	ZY1E_AHSI_W94.02_N45.45_20220927_015948_L1A0000508557	Sherburne County_20220927	Sherburne County	20220927	MN	-06	0	-1	0.7	有羽流	32.2719	227.254	14.0393	4.82544	8.86685	9.87176	1.09885	0.0586125	6090	1052.9	1052.9	955.175	0.698382	0.698382
131	38.5847	-85.4117	144	2022-03-27 16:51:14	2022-03-27 11:51:14	Electricity Generation (1.A.1.a.i)	CO2	RMFa	[-85.414421, 38.582981, -85.408335, 38.587241]	ZY1E	285.704	57.1645	3.62	0.505866	309	349.361	14212.7	ZY1E_AHSI_W85.49_N38.38_20220327_013308_L1A0000425150	Trimble County_20220327	Trimble County	20220327	KY	-05	0	-1	0		20.1363	37.0282	6.65458	4.49226	131.126	158.225	2.53814	0.0470625	6071	412.9	409.2	371.723	0.231406	-0.231406
132	34.4236	-92.1392	93	2022-01-13 17:14:27	2022-01-13 11:14:27	Electricity Generation (1.A.1.a.i)	CO2	RMFa	[-92.150734, 34.417032, -92.111426, 34.437736]	ZY1E	840.238	200.631	2.28	0.205183	255	1516.93	241609	ZY1E_AHSI_W92.11_N34.40_20220113_012261_L1A0000391521	White Bluff_20220113	White Bluff	20220113	AR	-06	0	-1	0.7	没有排放	21.0584	179.573	10.9839	8.51252	120.971	91.9379	1.42443	0.0509625	6009	901.3	897.1	816.757	0.02875	0.02875
133	34.4236	-92.1392	93	2022-03-09 17:14:19	2022-03-09 11:14:19	Electricity Generation (1.A.1.a.i)	CO2	RMFa	[-92.148857, 34.419160, -92.135065, 34.429354]	ZY1E	1304.45	242.946	2.83	0.465224	32	838.729	179586	ZY1E_AHSI_W92.15_N34.40_20220309_013050_L1A0000416988	White Bluff_20220309	White Bluff	20220309	AR	-06	0	-1	0.5	很多云，不适合反演	25.9653	216.98	10.0627	10.078	65.9652	62.2272	0.329558	0.0207437	6009	280.3	279.1	254.03	4.13504	4.13504
134	34.4236	-92.1392	93	2022-07-26 17:12:13	2022-07-26 11:12:13	Electricity Generation (1.A.1.a.i)	CO2	RMFa	[-92.142261, 34.422451, -92.107479, 34.446399]	ZY1E	1444.27	239.461	3.26	0.219317	227	1425.06	310575	ZY1E_AHSI_W91.94_N34.40_20220726_015044_L1A0000481359	White Bluff_20220726	White Bluff	20220726	AR	-06	0	-1	0.7	微弱的排放	32.1998	207.261	12.9651	6.4823	162.055	176.099	1.6881	0.0465062	6009	1389.4	1742.2	1324.45	0.0904623	0.0904623
135	34.4236	-92.1392	93	2023-11-04 17:03:42	2023-11-04 11:03:42	Electricity Generation (1.A.1.a.i)	CO2	RMFa	[-92.147950, 34.412935, -92.134265, 34.431182]	ZY1E	432.901	75.9623	0.86	0.250599	234	811.465	115865	ZY1E_AHSI_W92.33_N34.40_20231104_021729_L1A0000674441	White Bluff_20231104	White Bluff	20231104	AR	-06	0	1	1		16.0457	59.9166	11.5296	5.29441	105.856	30.3454	0.939075	0.0518812	6009	537.3	433.2	482.708	0.103184	-0.103184
136	40.4627	-107.591	1939	2023-10-20 18:26:24	2023-10-20 11:26:24	Electricity Generation (1.A.1.a.i)	CO2	RMFa	[-107.593263, 40.466393, -107.589463, 40.471654]	ZY1F	98.5667	22.1438	0.42	0.470779	45	302.411	9497.5	ZY1F_AHSI_W107.55_N40.59_20231020_009525_L1A0000564874	Craig_20231020	Craig	20231020	CO	-07	0	-1	0.5	22有一个羽流 24双羽流0.001	8.5677	13.5761	8.0553	3.02812	17.6086	2.46521	5.89768	0.0544688	6021	729.3	742.5	666.799	0.852179	-0.852179
137	36.3156	-86.4006	140	2023-03-05 16:54:32	2023-03-05 10:54:32	Electricity Generation (1.A.1.a.i)	CO2	RMFa	[-86.405280, 36.311334, -86.395249, 36.319645]	ZY1F	306.706	72.455	2.5	0.0950438	90	641.53	34988.6	ZY1F_AHSI_W86.57_N36.17_20230305_006234_L1A0000379047	Gallatin_20230305	Gallatin	20230305	TN	-06	0	-1	0	无排放	13.7822	58.6728	5.88714	3.40173	132.513	110.427	1.2763	0.0280437	3403	278.3	276	250.592	0.223929	0.223929
138	41.0808	-101.141	948	2023-06-24 18:00:53	2023-06-24 12:00:53	Electricity Generation (1.A.1.a.i)	CO2	RMFa	[-101.141503, 41.078717, -101.123926, 41.083404]	ZY1F	627.198	63.757	7.6	0.685152	272	419.622	33255.3	ZY1F_AHSI_W101.48_N41.04_20230624_007827_L1A0000469131	Gerald Gentleman Station_20230624	Gerald Gentleman Station	20230624	NE	-06	0	1	1	10波段效果好	18.0174	45.7396	5.41224	37.6989	16.4594	41.6971	2.18765	0.0373313	6077	688	687.2	624.143	0.00489408	0.00489408
139	41.0808	-101.141	948	2023-09-16 18:00:26	2023-09-16 12:00:26	Electricity Generation (1.A.1.a.i)	CO2	RMFa	[-101.142124, 41.067103, -101.103448, 41.087027]	ZY1F	1349.57	178.847	3.96	0.310215	280	1462.96	266200	ZY1F_AHSI_W101.04_N41.04_20230916_009032_L1A0000537816	Gerald Gentleman Station_20230916	Gerald Gentleman Station	20230916	NE	-06	0	1	1		17.8186	161.029	6.41537	15.3829	26.7232	35.2746	1.84302	0.034175	6077	1330.8	1109.2	1207.28	0.117856	0.117856
140	41.0808	-101.141	948	2023-11-10 18:01:07	2023-11-10 12:01:07	Electricity Generation (1.A.1.a.i)	CO2	RMFa	[-101.142148, 41.078844, -101.085611, 41.131572]	ZY1F	933.422	104.87	4.88	0.102632	208	1960.97	224539	ZY1F_AHSI_W101.05_N41.04_20231110_009821_L1A0000582861	Gerald Gentleman Station_20231110	Gerald Gentleman Station	20231110	NE	-06	0	-1	0.7		11.5778	93.2918	3.70375	6.01796	88.4433	143.868	2.87012	0.0268812	6077	1304.1	1307.4	1183.11	0.211043	-0.211043
141	39.3844	-80.3325	299	2022-06-21 16:24:44	2022-06-21 11:24:44	Electricity Generation (1.A.1.a.i)	CO2	RMFa	[-80.337384, 39.381433, -80.303111, 39.414254]	ZY1F	1445.95	318.165	2.33	0.291033	211	1668.19	443987	ZY1F_AHSI_W80.08_N39.27_20220621_002553_L1A0000190867	Harrison Power Station_20220621	Harrison Power Station	20220621	WV	-05	0	1	1	非常清晰	17.2716	300.893	8.09804	13.6686	25.0074	19.4224	1.84036	0.046025	3944	1900.6	2008.4	1763.31	0.179982	-0.179982
142	39.3844	-80.3325	299	2023-04-18 16:34:27	2023-04-18 11:34:27	Electricity Generation (1.A.1.a.i)	CO2	RMFa	[-80.340163, 39.382395, -80.325640, 39.397209]	ZY1F	573.061	67.4876	5.73	0.131149	258	877.321	57400.3	ZY1F_AHSI_W80.61_N39.27_20230418_006865_L1A0000414746	Harrison Power Station_20230418	Harrison Power Station	20230418	WV	-05	0	-1	0.7		16.8427	50.6448	4.93018	6.81492	153.128	292.475	2.40297	0.0325312	3944	631.6	618	565.987	0.0124987	0.0124987
143	39.1747	-111.029	1725	2023-06-23 18:36:03	2023-06-23 11:36:03	Electricity Generation (1.A.1.a.i)	CO2	RMFa	[-111.032231, 39.169656, -111.018868, 39.181857]	ZY1F	595.719	63.8166	6.19	0.263881	236	820.797	54025.1	ZY1F_AHSI_W110.73_N39.27_20230623_007813_L1A0000468861	Hunter_20230623	Hunter	20230623	UT	-07	0	-1	0.7	有点不像	14.0095	49.8071	4.56144	3.8432	53.6943	110.789	1.61151	0.0267812	6165	422.6	419.8	381.852	0.560077	0.560077
144	39.1747	-111.029	1725	2023-07-19 18:38:10	2023-07-19 11:38:10	Electricity Generation (1.A.1.a.i)	CO2	RMFa	[-111.068890, 39.165429, -111.027644, 39.188666]	ZY1F	449.85	66.651	0.5	0.430852	37	1697.29	130613	ZY1F_AHSI_W111.15_N39.27_20230719_008186_L1A0000490264	Hunter_20230719	Hunter	20230719	UT	-07	0	1	1	清晰完美	4.62946	62.0215	4.22384	18.752	60.6595	10.1099	2.34268	0.0084	6165	656.412	749.552	649.001	0.306857	-0.306857
145	39.1747	-111.029	1725	2023-08-17 18:36:51	2023-08-17 11:36:51	Electricity Generation (1.A.1.a.i)	CO2	RMFa	[-111.067763, 39.162627, -111.026514, 39.189933]	ZY1F	791.526	199.385	2.06	1.37558	219	1744.37	87875.4	ZY1F_AHSI_W110.71_N39.27_20230817_008602_L1A0000512937	Hunter_20230817	Hunter	20230817	UT	-07	0	1	1		6.81749	192.567	4.07648	15.3518	123.896	85.0751	3.26457	0.0088375	6165	654	651.7	592.047	0.336931	0.336931
146	29.3091	-98.3205	149	2022-10-13 17:33:02	2022-10-13 11:33:02	Electricity Generation (1.A.1.a.i)	CO2	RMFa	[-98.358363, 29.273718, -98.317481, 29.310400]	ZY1F	1643.36	162.349	5.76	0.121655	39	2023.33	378772	ZY1F_AHSI_W98.47_N29.51_20221013_004183_L1A0000250381	J K Spruce_20221013	J K Spruce	20221013	TX	-06	0	-1	0.7	噪声较大	17.6688	144.68	4.80873	7.99624	165.417	317.6	2.01147	0.0246375	7097	1492.3	1495.9	1355.59	0.212289	0.212289
147	38.3472	-94.6467	263	2022-09-20 17:24:31	2022-09-20 11:24:31	Electricity Generation (1.A.1.a.i)	CO2	RMFa	[-94.648885, 38.347134, -94.633553, 38.363912]	ZY1F	720.471	91.0259	5.01	0.83	206	979.537	85530.1	ZY1F_AHSI_W94.55_N38.38_20220920_003853_L1A0000229994	La Cygne_20220920	La Cygne	20220920	KS	-06	0	-1	0.7	水汽影响太大了	20.5062	70.5197	6.30174	4.8992	129.153	215.685	2.19826	0.0315812	1241	759.1	765.6	691.003	0.0426461	0.0426461
148	38.3472	-94.6467	263	2023-01-08 17:27:27	2023-01-08 11:27:27	Electricity Generation (1.A.1.a.i)	CO2	RMFa	[-94.649381, 38.329123, -94.588927, 38.367015]	ZY1F	855.083	127.681	1.2	0.0305505	222	2848.08	616107	ZY1F_AHSI_W94.58_N38.38_20230108_005431_L1A0000329362	La Cygne_20230108	La Cygne	20230108	KS	-06	0	-1	0.7	噪声较大	8.97868	118.702	6.10645	5.25258	27.2676	10.907	1.63409	0.0195563	1241	1406.5	1398.2	1272.57	0.328065	-0.328065
149	38.3472	-94.6467	263	2023-08-16 17:31:23	2023-08-16 11:31:23	Electricity Generation (1.A.1.a.i)	CO2	RMFa	[-94.657236, 38.333432, -94.616153, 38.352238]	ZY1F	959.76	178.554	2.8	0.0635085	178	1510.94	246166	ZY1F_AHSI_W94.56_N38.38_20230816_008587_L1A0000512042	La Cygne_20230816	La Cygne	20230816	KS	-06	0	1	1	飘到湖面上了	17.0435	161.511	7.2679	14.7619	136.6	127.494	2.10384	0.048675	1241	1273.7	1441.1	1233.94	0.222201	-0.222201
150	38.5583	-90.8361	146	2023-07-04 17:16:01	2023-07-04 11:16:01	Electricity Generation (1.A.1.a.i)	CO2	RMFa	[-90.839565, 38.561305, -90.784484, 38.588556]	ZY1F	2642.7	551.764	2.41	0.438786	132	1662.48	800995	ZY1F_AHSI_W90.79_N38.83_20230704_007970_L1A0000476992	Labadie_20230704	Labadie	20230704	MO	-06	0	1	1	构成羽流，有排放	23.812	527.952	10.416	16.8258	113.658	91.305	1.33894	0.0224312	2103	2560.7	2558.1	2322.4	0.137918	0.137918
151	38.5583	-90.8361	146	2023-10-22 17:17:43	2023-10-22 11:17:43	Electricity Generation (1.A.1.a.i)	CO2	RMFa	[-90.885718, 38.548185, -90.836248, 38.575090]	ZY1F	1629.74	246.213	1.92	0.172143	81	2163.49	749483	ZY1F_AHSI_W90.93_N38.38_20231022_009549_L1A0000565683	Labadie_20231022	Labadie	20231022	MO	-06	0	-1	0.7	受江水影响较大	18.8836	227.329	9.84907	6.28392	80.5951	51.5808	1.59789	0.052475	2103	2197.7	2194	1992.77	0.182171	-0.182171
152	42.1103	-104.883	1393	2023-09-30 18:16:43	2023-09-30 11:16:43	Electricity Generation (1.A.1.a.i)	CO2	RMFa	[-104.891838, 42.108115, -104.874772, 42.119002]	ZY1F	760.833	117.481	3.4	1.52844	118	944.545	105903	ZY1F_AHSI_W104.83_N41.92_20230930_009233_L1A0000549577	Laramie River_20230930	Laramie River	20230930	WY	-07	0	-1	0.7	有羽流	12.749	104.732	5.06363	6.83198	11.1797	12.6704	1.71298	0.0519437	6204	798.9	661.1	691.414	0.100402	0.100402
153	32.2597	-94.5703	98	2022-08-02 17:17:29	2022-08-02 11:17:29	Electricity Generation (1.A.1.a.i)	CO2	RMFa	[-94.571951, 32.259098, -94.514058, 32.297223]	ZY1F	2239.1	336.163	3.39	0.392471	225	2085.35	689222	ZY1F_AHSI_W94.57_N32.17_20220802_003150_L1A0000184740	Martin Lake_20220802	Martin Lake	20220802	TX	-06	0	-1	0.7	有排放，圆形，堆叠状，飘到湖面上	27.0508	309.112	10.0443	9.09322	129.249	146.051	1.80366	0.0468688	6146	2263.6	2623.6	2146.04	0.0433645	0.0433645
154	32.2597	-94.5703	98	2022-11-20 17:20:45	2022-11-20 11:20:45	Electricity Generation (1.A.1.a.i)	CO2	RMFa	[-94.616748, 32.242709, -94.569307, 32.274902]	ZY1F	1843.67	316.558	2.97	0.366606	70	2165.72	636339	ZY1F_AHSI_W94.61_N32.17_20221120_004728_L1A0000290523	Martin Lake_20221120	Martin Lake	20221120	TX	-06	0	-1	0.7	有一点羽流比较稀疏	25.3545	291.203	10.0281	7.95664	161.852	160.233	2.26842	0.0447875	6146	2635.2	2664.4	2399.44	0.231627	-0.231627
155	32.2597	-94.5703	98	2023-12-10 17:27:08	2023-12-10 11:27:08	Electricity Generation (1.A.1.a.i)	CO2	RMFa	[-94.586954, 32.244626, -94.564927, 32.271453]	ZY1F	1035.82	128	4.79	0.737496	331	1250.58	68071.1	ZY1F_AHSI_W94.55_N32.17_20231210_010251_L1A0000608285	Martin Lake_20231210	Martin Lake	20231210	TX	-06	0	1	1	有羽流	22.9122	105.088	7.11065	8.09015	109.321	174.549	4.75486	0.0413562	6146	1027.6	1026.4	931.733	0.11171	0.11171
156	31.185	-96.4853	129	2022-07-27 17:24:51	2022-07-27 11:24:51	Electricity Generation (1.A.1.a.i)	CO2	RMFa	[-96.520343, 31.178478, -96.478951, 31.230569]	ZY1F	1582.59	213.39	3.79	0.187172	192	2192.73	482217	ZY1F_AHSI_W96.64_N31.29_20220727_003064_L1A0000178119	Oak Grove_20220727	Oak Grove	20220727	TX	-06	0	-1	0.7		16.8714	196.518	5.56171	10.9684	8.60864	10.8756	1.53785	0.0293937	6180	1241	1493.7	1217.51	0.299853	0.299853
157	31.185	-96.4853	129	2023-01-08 17:29:27	2023-01-08 11:29:27	Electricity Generation (1.A.1.a.i)	CO2	RMFa	[-96.507131, 31.152236, -96.484042, 31.184054]	ZY1F	1204.74	146.498	4.4	0.247049	1	1466.76	227361	ZY1F_AHSI_W96.67_N31.29_20230108_005431_L1A0000329378	Oak Grove_20230108	Oak Grove	20230108	TX	-06	0	1	1	有羽流，水池下方有一个点源	15.3724	131.126	4.84096	8.92698	6.0298	8.84371	3.19547	0.0279063	6180	1957.3	1974.5	1783.17	0.324383	-0.324383
158	31.185	-96.4853	129	2023-03-04 17:30:35	2023-03-04 11:30:35	Electricity Generation (1.A.1.a.i)	CO2	RMFa	[-96.493099, 31.177963, -96.482963, 31.192041]	ZY1F	577.679	86.6036	3.8	0.10504	182	809.928	64926.3	ZY1F_AHSI_W96.65_N31.29_20230304_006220_L1A0000378222	Oak Grove_20230304	Oak Grove	20230304	TX	-06	0	-1	0.7	被云挡住了	15.044	71.5596	5.2081	8.20109	27.1425	34.3805	2.05069	0.0306125	6180	650.4	654.3	591.802	0.0238647	-0.0238647
159	31.185	-96.4853	129	2023-08-16 17:33:23	2023-08-16 11:33:23	Electricity Generation (1.A.1.a.i)	CO2	RMFa	[-96.505172, 31.140852, -96.475886, 31.183091]	ZY1F	2369.37	447.466	2.6	0.695006	360	1961.73	688469	ZY1F_AHSI_W96.65_N31.29_20230816_008587_L1A0000512058	Oak Grove_20230816	Oak Grove	20230816	TX	-06	0	1	1	羽流很好，简直完美！！！适合作为案例	14.3	433.166	5.57203	22.2723	1.70123	1.4744	1.3017	0.026525	6180	1820.5	1806.6	1644.59	0.4407	0.4407
160	29.9172	-96.7506	115	2023-03-04 17:30:57	2023-03-04 11:30:57	Electricity Generation (1.A.1.a.i)	CO2	RMFa	[-96.771428, 29.915802, -96.741703, 29.950575]	ZY1F	1216.2	204.818	3.01	0.262742	176	1927.53	404580	ZY1F_AHSI_W97.01_N29.95_20230304_006220_L1A0000378225	Sam Seymour_20230304	Sam Seymour	20230304	TX	-06	0	1	1		15.4082	189.41	5.8514	8.3629	19.567	19.6323	0.932847	0.0215375	6179	672.8	881.2	704.883	0.7254	0.7254
161	29.9172	-96.7506	115	2023-08-16 17:33:45	2023-08-16 11:33:45	Electricity Generation (1.A.1.a.i)	CO2	RMFa	[-96.778529, 29.873562, -96.749084, 29.917869]	ZY1F	1398.67	296.259	2.37	0.358515	28	1943.18	299889	ZY1F_AHSI_W97.01_N29.95_20230816_008587_L1A0000512061	Sam Seymour_20230816	Sam Seymour	20230816	TX	-06	0	1	1		11.158	285.101	4.67023	10.5175	5.74815	4.54104	2.22018	0.0271125	6179	1354.8	1363.7	1233.49	0.13391	0.13391
162	37.1517	-88.775	105	2023-10-31 17:07:20	2023-10-31 11:07:20	Electricity Generation (1.A.1.a.i)	CO2	RMFa	[-88.779982, 37.141833, -88.749494, 37.159665]	ZY1F	989.884	150.307	3.6	0.79689	270	1339.2	189327	ZY1F_AHSI_W88.63_N37.05_20231031_009677_L1A0000574307	Shawnee_20231031	Shawnee	20231031	KY	-06	0	-1	0.7	羽流飘到了水面上，水汽干扰大	21.3406	128.966	7.78841	4.14454	97.4551	116.946	1.569	0.0618688	1379	879.1	888.799	798.533	0.239629	0.239629
163	45.3792	-93.8958	292	2022-07-21 17:27:56	2022-07-21 11:27:56	Electricity Generation (1.A.1.a.i)	CO2	RMFa	[-93.899069, 45.356748, -93.870272, 45.381946]	ZY1F	2131.82	213.487	5.9	0.219621	309	1039.79	177975	ZY1F_AHSI_W93.93_N45.45_20220721_002978_L1A0000173921	Sherburne County_20220721	Sherburne County	20220721	MN	-06	0	1	1	适合作为反演案例	29.0502	184.437	8.47072	11.689	4.37206	8.59839	3.54729	0.0379	6090	2400.9	2419.9	2185.82	0.0247028	-0.0247028

## Sheet: Supplementary Table 1
Facility Name	EPA inventory(t/h)	Inversion Error	Estimated Intensity	Quantification	Emission	Clear-sky
Antelope Valley	716.501	-0.0314686	683 ± 123	6	6	8
Craig	804.82	0.0938026	885 ± 161	10	11	11
Four Corners Steam Elec Station	1086.42	-0.0408805	1027 ± 160	8	8	8
Gallatin	692.586	0.00970678	699 ± 116	1	2	3
Gerald Gentleman Station	1025.36	0.0224506	1015 ± 134	9	10	10
Harrington Station	491.681	-0.162288	423 ± 55	5	8	10
Harrison Power Station	1202.48	-0.0220357	1135 ± 194	8	9	9
Hunter	677.942	0.0116046	650 ± 115	8	9	9
J K Spruce	902.285	0.233094	1110 ± 173	10	11	11
Jim Bridger	1188.49	-0.21303	877 ± 104	7	8	8
La Cygne	927.06	-0.0322722	888 ± 152	7	8	8
Labadie	1960.71	-0.125552	1730 ± 300	5	5	5
Laramie River	908.563	0.100524	958 ± 142	4	4	4
Martin Lake	1503.78	0.117004	1582 ± 247	15	16	16
Oak Grove	1357.86	0.124976	1484 ± 210	12	12	12
Sam Seymour	1210.83	0.0955187	1272 ± 206	8	8	8
Shawnee	775.319	0.0249291	778 ± 124	6	7	7
Sherburne County	1251.62	0.0854707	1252 ± 189	5	5	5
Trimble County	1144.74	0.130207	1311 ± 170	3	4	5
White Bluff	866.309	-0.0321543	859 ± 159	4	6	6
Total	1078.57	0.035355	1087 ± 170	141	157	163

## Sheet: Supplementary Table 2
'Total'	141	1087.45	170.106	18.8958	151.21	1087.45	t/h	1087 t/h	170.106	t/h	0.156427	170 t/h (15.6%)	18.8958	t/h	0.0173763	19 t/h (1.7%)	151.21	t/h	0.13905	151 t/h (13.9%)
'High Confidence Plume'	49	1088.17	178.523	17.4839	161.039	1088.17	t/h	1088 t/h	178.523	t/h	0.164058	179 t/h (16.4%)	17.4839	t/h	0.0160673	17 t/h (1.6%)	161.039	t/h	0.147991	161 t/h (14.8%)
'Medium Confidence Plume'	92	1087.06	165.623	19.6478	145.975	1087.06	t/h	1087 t/h	165.623	t/h	0.152358	166 t/h (15.2%)	19.6478	t/h	0.0180742	20 t/h (1.8%)	145.975	t/h	0.134284	146 t/h (13.4%)
'Low Wind Speed (U<3m/s)'	72	1091.24	145.151	22.6347	122.517	1091.24	t/h	1091 t/h	145.151	t/h	0.133015	145 t/h (13.3%)	22.6347	t/h	0.0207422	23 t/h (2.1%)	122.517	t/h	0.112273	123 t/h (11.2%)
'High Wind Speed (U≥3m/s)'	69	1083.49	196.145	14.9943	181.151	1083.49	t/h	1083 t/h	196.145	t/h	0.181031	196 t/h (18.1%)	14.9943	t/h	0.0138389	15 t/h (1.4%)	181.151	t/h	0.167192	181 t/h (16.7%)
'Weak Emission (Q<1kt/h)'	69	1509.16	235.205	21.2108	213.994	1509.16	t/h	1509 t/h	235.205	t/h	0.155851	235 t/h (15.6%)	21.2108	t/h	0.0140547	21 t/h (1.4%)	213.994	t/h	0.141796	214 t/h (14.2%)
'Strong Emission (Q≥1kt/h)'	72	683.301	107.719	16.6772	91.0417	683.301	t/h	683 t/h	107.719	t/h	0.157645	108 t/h (15.8%)	16.6772	t/h	0.0244068	17 t/h (2.4%)	91.0417	t/h	0.133238	91 t/h (13.3%)
Categories	Scenes	Emission Rate	Total Uncertainty	Uncertainty of IME	Uncertainty of Wind
Total	141	1087 t/h	170 t/h (15.6%)	19 t/h (1.7%)	151 t/h (13.9%)
High Confidence Plume	49	1088 t/h	179 t/h (16.4%)	17 t/h (1.6%)	161 t/h (14.8%)
Medium Confidence Plume	92	1087 t/h	166 t/h (15.2%)	20 t/h (1.8%)	146 t/h (13.4%)
Low Wind Speed (U<3m/s)	72	1091 t/h	145 t/h (13.3%)	23 t/h (2.1%)	123 t/h (11.2%)
High Wind Speed (U≥3m/s)	69	1083 t/h	196 t/h (18.1%)	15 t/h (1.4%)	181 t/h (16.7%)
Weak Emission (Q<1kt/h)	69	1509 t/h	235 t/h (15.6%)	21 t/h (1.4%)	214 t/h (14.2%)
Strong Emission (Q≥1kt/h)	72	683 t/h	108 t/h (15.8%)	17 t/h (2.4%)	91 t/h (13.3%)

## Sheet: Supplementary Table 3
Latitude	Longitude	Facility	ID	Satellite	Date	EPA (t/h)	Estimate (t/h)	%Δ	Uncertainty (t/h)	Wind speed (m/s)
32.2597	-94.5703	Martin Lake	1	GF5A	20230908	2459.44	2798.87	0.13801	406.351	3.48
			2	GF5A	20240422	654.581	646.652	-0.0121132	106.604	1.28
			3	GF5B	20220407	1336.39	1230.24	-0.0794306	130.463	6.16
			4	GF5B	20230717	2301.61	2375.92	0.0322834	308.46	3.97
			5	GF5B	20230906	2419.92	2066.16	-0.146186	379.539	2.72
			6	GF5B	20231103	1349.95	1857.44	0.375936	402.56	2.34
			7	GF5B	20240213	996.57	1516.6	0.521825	224.932	1.3
			8	GF5B	20240404	1002.8	1931.14	0.925742	295.312	3.31
			9	GF5B	20240601	584.962	892.693	0.52607	143.169	1.53
			10	ZY1E	20210104	1208.65	1144.46	-0.0531026	176.302	1.96
			11	ZY1E	20210401	1080.46	986.936	-0.0865568	174.124	3.06
			12	ZY1E	20220303	1684.18	1160.62	-0.31087	171.553	0.58
			13	ZY1F	20220802	2146.04	2239.1	0.0433645	336.163	3.39
			14	ZY1F	20221120	2399.44	1843.67	-0.231627	316.558	2.97
			15	ZY1F	20231210	931.733	1035.82	0.11171	128	4.79
			16	PRISMA	20220716	1807	1451	-0.197012	315	2.43
			17	PRISMA	20220923	1139	1961	0.721686	462	1.97
			18	PRISMA	20220402	2399	2598	0.0829512	983	0.94
38.5583	-90.8361	Labadie	1	ZY1E	20210925	1581.74	1626.66	0.028398	287.495	1.58
			2	ZY1E	20220113	1672.1	1038.07	-0.379181	162.307	1.58
			3	ZY1E	20230329	2234.56	1714.52	-0.232726	250.829	1.58
			4	ZY1F	20230704	2322.4	2642.7	0.137918	551.764	1.58
			5	ZY1F	20231022	1992.77	1629.74	-0.182171	246.213	1.58
			6	PRISMA	07/10/2022	2121	730	-0.655823	182	1.81
40.4627	-107.591	Craig	1	GF5	20190803	1233.4	1466.05	0.188622	247.353	3.26
			2	GF5A	20230916	872.471	1251.1	0.433972	296.633	2.24
			3	GF5A	20231206	809.405	879.445	0.0865321	137.251	0.92
			4	GF5A	20240606	453.181	460.86	0.0169436	76.5122	1.35
			5	GF5A	20240613	912.038	978.512	0.0728849	148.473	4
			6	GF5B	20221018	753.674	825.052	0.0947061	123.962	1.63
			7	GF5B	20230926	717.384	719.974	0.00361077	109.897	1.1
			8	GF5B	20240113	1037.63	755.962	-0.27145	204.446	2.08
			9	ZY1E	20230715	811.9	1064.54	0.311176	193.017	2.81
			10	ZY1E	20231007	447.12	447.58	0.00102939	74.1459	1.36
			11	PRISMA	20220708	1245	799	-0.358233	169	2.44
			12	PRISMA	20210829	901	776	-0.138735	216	1.46
			13	PRISMA	20220823	961	672	-0.300728	171	1.69
			14	PRISMA	20220418	864	632	-0.268519	141	2.19
			15	PRISMA	20210915	531	555	0.0451977	107	3.07
34.4236	-92.1392	White Bluff	1	GF5A	20240614	841.316	719.623	-0.144645	119.198	1.86
			2	ZY1E	20220113	816.757	840.238	0.02875	200.631	2.28
			3	ZY1E	20220726	1324.45	1444.27	0.0904623	239.461	3.26
			4	ZY1E	20231104	482.708	432.901	-0.103184	75.9623	0.86
			5	OCO-2	08/15/2015	1513	1917	0.267019	596	2.35
id	latitude	longitude	altitude	datetime	local_datetime	ipcc_sector	gas	algorithm	plume_bounds	platform	emission	emission_uncertainty	wind_speed	wind_speed_std	wind_direction	plume_length	vertical_mass_atmosphere	filename	foldername	facility	date	state	timezone	correction	extraction	plume_quality	remarks	uncertainty_ime_part	uncertainty_wind_part	inversion_std	ratio_plume_bkg	wind_direction_offset	wind_deviation	wind_fit	ratio_rgb_outlier	id_epa_facility	q_former	q_latter	emission_epa	quantification_error	quantification_error2
34	32.2597	-94.5703	98	2023-09-08 19:22:37	2023-09-08 13:22:37	Electricity Generation (1.A.1.a.i)	CO2	RMFa	[-94.616933, 32.252032, -94.568042, 32.277081]	GF5A	2798.87	406.351	3.48	0.440038	108	2203.1	897062	GF5A_AHSI_W94.3_N32.3_20230908_003994_L10000051261	Martin Lake_20230908	Martin Lake	20230908	TX	-06	0	-1	0.7		29.6855	376.666	9.61623	9.99309	23.3763	27.1165	1.67783	0.049025	6146	2712.1	2709.3	2459.44	0.13801	0.13801
36	32.2597	-94.5703	98	2024-04-22 19:19:10	2024-04-22 13:19:10	Electricity Generation (1.A.1.a.i)	CO2	RMFa	[-94.584144, 32.256461, -94.567837, 32.272164]	GF5A	646.652	106.604	1.28	0.083865	141	939.932	150585	GF5A_AHSI_W94.8_N32.3_20240422_007301_L10000118547	Martin Lake_20240422	Martin Lake	20240422	TX	-06	0	-1	0.7		16.7801	89.8239	9.18449	5.00958	84.9433	36.2425	1.13495	0.0384437	6146	723.8	716.7	654.581	0.0121132	-0.0121132
67	32.2597	-94.5703	98	2022-04-07 17:05:50	2022-04-07 11:05:50	Electricity Generation (1.A.1.a.i)	CO2	RMFa	[-94.575395, 32.255241, -94.558807, 32.281951]	GF5B	1230.24	130.463	6.16	0.576397	306	1165.76	158782	GF5B_AHSI_W94.5_N32.3_20220407_003097_L10000107611	Martin Lake_20220407	Martin Lake	20220407	TX	-06	0	-1	0.7		27.2524	103.211	7.24457	6.16338	36	73.92	2.72547	0.04465	6146	1469.4	1514	1336.39	0.0794306	-0.0794306
68	32.2597	-94.5703	98	2023-07-17 17:13:09	2023-07-17 11:13:09	Electricity Generation (1.A.1.a.i)	CO2	RMFa	[-94.571135, 32.256608, -94.536684, 32.291628]	GF5B	2375.92	308.46	3.97	0.223681	229	1843.1	594034	GF5B_AHSI_W94.5_N32.1_20230717_009886_L10000361780	Martin Lake_20230717	Martin Lake	20230717	TX	-06	1	-1	0.7		25.6093	282.851	8.59591	12.1552	9.10524	12.0493	1.98366	0.0505625	6146	2491.4	2702.3	2301.61	0.0322834	0.0322834
69	32.2597	-94.5703	98	2023-09-06 17:13:22	2023-09-06 11:13:22	Electricity Generation (1.A.1.a.i)	CO2	RMFa	[-94.577260, 32.251630, -94.514368, 32.292903]	GF5B	2066.16	379.539	2.72	0.502129	234	2691.38	935792	GF5B_AHSI_W94.4_N32.3_20230906_010629_L10000386730	Martin Lake_20230906	Martin Lake	20230906	TX	-06	0	-1	0.7		20.5406	358.998	8.60707	7.0624	13.9661	12.6626	1.93328	0.0471312	6146	2665.3	2675.5	2419.92	0.146186	-0.146186
70	32.2597	-94.5703	98	2023-11-03 17:12:54	2023-11-03 11:12:54	Electricity Generation (1.A.1.a.i)	CO2	RMFa	[-94.579683, 32.249187, -94.556639, 32.315229]	GF5B	1857.44	402.56	2.34	0.189033	160	2692.97	930858	GF5B_AHSI_W94.3_N32.3_20231103_011474_L10000414550	Martin Lake_20231103	Martin Lake	20231103	TX	-06	0	-1	0.7		18.0505	384.509	8.85384	7.24135	43.7926	34.1582	1.08483	0.0438562	6146	1488.1	1487.9	1349.95	0.375936	0.375936
71	32.2597	-94.5703	98	2024-02-13 17:13:08	2024-02-13 11:13:08	Electricity Generation (1.A.1.a.i)	CO2	RMFa	[-94.589192, 32.260461, -94.555766, 32.307651]	GF5B	1516.6	224.932	1.3	0.542433	203	2604.18	973458	GF5B_AHSI_W94.4_N32.3_20240213_012960_L10000468942	Martin Lake_20240213	Martin Lake	20240213	TX	-06	0	-1	0.7		14.2346	210.698	8.48216	5.53315	160.356	69.4876	0.740558	0.0434063	6146	1097.1	1103.7	996.57	0.521825	0.521825
72	32.2597	-94.5703	98	2024-04-04 17:12:16	2024-04-04 11:12:16	Electricity Generation (1.A.1.a.i)	CO2	RMFa	[-94.582585, 32.254100, -94.550820, 32.279681]	GF5B	1931.14	295.312	3.31	0.226053	273	1965.9	567949	GF5B_AHSI_W94.3_N32.3_20240404_013703_L10000494997	Martin Lake_20240404	Martin Lake	20240404	TX	-06	0	-1	0.7		22.3581	272.954	8.07561	11.6385	83.1185	91.7074	0.964197	0.0385187	6146	1103	1115	1002.8	0.925742	0.925742
73	32.2597	-94.5703	98	2024-06-01 17:13:43	2024-06-01 11:13:43	Electricity Generation (1.A.1.a.i)	CO2	RMFa	[-94.587019, 32.252474, -94.568788, 32.266217]	GF5B	892.693	143.169	1.53	0.051316	101	1117.47	232134	GF5B_AHSI_W94.8_N32.3_20240601_014548_L10000524560	Martin Lake_20240601	Martin Lake	20240601	TX	-06	1	-1	0.7		18.946	124.222	11.8033	7.4878	54.5608	27.826	0.782205	0.0466063	6146	647.8	634	584.962	0.52607	0.52607
111	32.2597	-94.5703	98	2021-01-04 17:21:40	2021-01-04 11:21:40	Electricity Generation (1.A.1.a.i)	CO2	RMFa	[-94.571779, 32.232940, -94.517503, 32.269920]	ZY1E	1144.46	176.302	1.96	0.0416333	285	2488.65	600090	ZY1E_AHSI_W94.77_N32.17_20210104_006896_L1A0000221658	Martin Lake_20210104	Martin Lake	20210104	TX	-06	0	-1	0.7		16.6279	159.674	9.02415	4.77836	41.2087	26.923	1.39234	0.0507375	6146	1286	1418.3	1208.65	0.0531026	-0.0531026
112	32.2597	-94.5703	98	2021-04-01 17:20:59	2021-04-01 11:20:59	Electricity Generation (1.A.1.a.i)	CO2	RMFa	[-94.594071, 32.238930, -94.567832, 32.260994]	ZY1E	986.936	174.124	3.06	0.725465	38	1090.45	168482	ZY1E_AHSI_W94.40_N32.17_20210401_008144_L1A0000261751	Martin Lake_20210401	Martin Lake	20210401	TX	-06	0	-1	0.7		23.0409	151.083	8.69338	6.06083	171.651	175.084	1.94247	0.04435	6146	1201.3	1170.4	1080.46	0.0865568	-0.0865568
113	32.2597	-94.5703	98	2022-03-03 17:22:15	2022-03-03 11:22:15	Electricity Generation (1.A.1.a.i)	CO2	RMFa	[-94.606540, 32.259023, -94.565099, 32.319247]	ZY1E	1160.62	171.553	0.58	0.17088	239	2710.89	951833	ZY1E_AHSI_W94.59_N32.17_20220303_012967_L1A0000414108	Martin Lake_20220303	Martin Lake	20220303	TX	-06	0	-1	0.7		11.3864	160.166	7.87856	7.01141	15.7014	3.0356	1.3324	0.0434438	6146	1866.9	1838.5	1684.18	0.31087	-0.31087
153	32.2597	-94.5703	98	2022-08-02 17:17:29	2022-08-02 11:17:29	Electricity Generation (1.A.1.a.i)	CO2	RMFa	[-94.571951, 32.259098, -94.514058, 32.297223]	ZY1F	2239.1	336.163	3.39	0.392471	225	2085.35	689222	ZY1F_AHSI_W94.57_N32.17_20220802_003150_L1A0000184740	Martin Lake_20220802	Martin Lake	20220802	TX	-06	0	-1	0.7		27.0508	309.112	10.0443	9.09322	129.249	146.051	1.80366	0.0468688	6146	2263.6	2623.6	2146.04	0.0433645	0.0433645
154	32.2597	-94.5703	98	2022-11-20 17:20:45	2022-11-20 11:20:45	Electricity Generation (1.A.1.a.i)	CO2	RMFa	[-94.616748, 32.242709, -94.569307, 32.274902]	ZY1F	1843.67	316.558	2.97	0.366606	70	2165.72	636339	ZY1F_AHSI_W94.61_N32.17_20221120_004728_L1A0000290523	Martin Lake_20221120	Martin Lake	20221120	TX	-06	0	-1	0.7		25.3545	291.203	10.0281	7.95664	161.852	160.233	2.26842	0.0447875	6146	2635.2	2664.4	2399.44	0.231627	-0.231627
155	32.2597	-94.5703	98	2023-12-10 17:27:08	2023-12-10 11:27:08	Electricity Generation (1.A.1.a.i)	CO2	RMFa	[-94.586954, 32.244626, -94.564927, 32.271453]	ZY1F	1035.82	128	4.79	0.737496	331	1250.58	68071.1	ZY1F_AHSI_W94.55_N32.17_20231210_010251_L1A0000608285	Martin Lake_20231210	Martin Lake	20231210	TX	-06	0	1	1		22.9122	105.088	7.11065	8.09015	109.321	174.549	4.75486	0.0413562	6146	1027.6	1026.4	931.733	0.11171	0.11171
105	38.5583	-90.8361	146	2021-09-25 17:13:23	2021-09-25 11:13:23	Electricity Generation (1.A.1.a.i)	CO2	RMFa	[-90.842451, 38.545736, -90.811985, 38.572241]	ZY1E	1626.66	287.495	2.94	0.581292	280	1627.01	424379	ZY1E_AHSI_W90.79_N38.83_20210925_010683_L1A0000340283	Labadie_20210925	Labadie	20210925	MO	-06	0	-1	0.7		27.7882	259.707	11.5916	6.73284	34.8007	34.1047	1.68449	0.0544063	2103	1746.6	1732.6	1581.74	0.028398	0.028398
106	38.5583	-90.8361	146	2022-01-13 17:13:19	2022-01-13 11:13:19	Electricity Generation (1.A.1.a.i)	CO2	RMFa	[-90.846636, 38.497453, -90.823816, 38.557089]	ZY1E	1038.07	162.307	1.73	0.289194	280	1904.85	438820	ZY1E_AHSI_W90.90_N38.38_20220113_012261_L1A0000391512	Labadie_20220113	Labadie	20220113	MO	-06	0	-1	0.7		17.6688	144.638	10.1099	4.99246	124.135	71.5845	2.01621	0.041875	2103	1841.4	1849.6	1672.1	0.379181	-0.379181
107	38.5583	-90.8361	146	2023-03-29 17:07:56	2023-03-29 11:07:56	Electricity Generation (1.A.1.a.i)	CO2	RMFa	[-90.840681, 38.561619, -90.778336, 38.614105]	ZY1E	1714.52	250.829	1.58	0.291433	235	2449.92	951184	ZY1E_AHSI_W90.98_N38.38_20230329_018573_L1A0000585856	Labadie_20230329	Labadie	20230329	MO	-06	0	1	1		12.1661	238.663	6.56925	6.16419	4.01467	2.11439	1.59874	0.0442688	2103	2464.5	2453.2	2234.56	0.232726	-0.232726
150	38.5583	-90.8361	146	2023-07-04 17:16:01	2023-07-04 11:16:01	Electricity Generation (1.A.1.a.i)	CO2	RMFa	[-90.839565, 38.561305, -90.784484, 38.588556]	ZY1F	2642.7	551.764	2.41	0.438786	132	1662.48	800995	ZY1F_AHSI_W90.79_N38.83_20230704_007970_L1A0000476992	Labadie_20230704	Labadie	20230704	MO	-06	0	1	1		23.812	527.952	10.416	16.8258	113.658	91.305	1.33894	0.0224312	2103	2560.7	2558.1	2322.4	0.137918	0.137918
151	38.5583	-90.8361	146	2023-10-22 17:17:43	2023-10-22 11:17:43	Electricity Generation (1.A.1.a.i)	CO2	RMFa	[-90.885718, 38.548185, -90.836248, 38.575090]	ZY1F	1629.74	246.213	1.92	0.172143	81	2163.49	749483	ZY1F_AHSI_W90.93_N38.38_20231022_009549_L1A0000565683	Labadie_20231022	Labadie	20231022	MO	-06	0	-1	0.7		18.8836	227.329	9.84907	6.28392	80.5951	51.5808	1.59789	0.052475	2103	2197.7	2194	1992.77	0.182171	-0.182171
1	40.4627	-107.591	1939	2019-08-02 20:08:09	2019-08-02 13:08:09	Electricity Generation (1.A.1.a.i)	CO2	RMFa	[-107.591898, 40.456378, -107.578467, 40.467516]	GF5	1466.05	247.353	3.26	0.20232	310	772.022	170791	GF5_AHSI_W107.84_N40.19_20190803_006569_L10000052859	Craig_20190802	Craig	20190803	CO	-07	0	-1	0.7		36.9661	210.387	15.2629	8.44143	1.22786	1.33427	1.5487	0.0762875	6021	1356.3	1381	1233.4	0.188622	0.188622
6	40.4627	-107.591	1939	2023-09-16 20:09:27	2023-09-16 13:09:27	Electricity Generation (1.A.1.a.i)	CO2	RMFa	[-107.617336, 40.459746, -107.584881, 40.488595]	GF5A	1251.1	296.633	2.24	0.295691	280	1568.91	321522	GF5A_AHSI_W107.8_N40.2_20230916_004111_L10000052906	Craig_20230916	Craig	20230916	CO	-07	0	1	1		23.3008	273.332	12.5671	4.6291	119.969	89.5767	1.18259	0.0356901	6021	962.5	957.4	872.471	0.433972	0.433972
7	40.4627	-107.591	1939	2023-12-06 20:05:46	2023-12-06 13:05:46	Electricity Generation (1.A.1.a.i)	CO2	RMFa	[-107.600744, 40.457132, -107.567426, 40.482533]	GF5A	879.445	137.251	0.92	0.352326	77	1917.08	460586	GF5A_AHSI_W107.6_N40.7_20231206_005292_L10000072037	Craig_20231206	Craig	20231206	CO	-07	0	-1	0.7		15.4602	121.791	12.6543	4.43005	130.12	39.9033	0.935821	0.0438375	6021	892.1	893.5	809.405	0.0865321	0.0865321
8	40.4627	-107.591	1939	2024-06-06 20:02:05	2024-06-06 13:02:05	Electricity Generation (1.A.1.a.i)	CO2	RMFa	[-107.599209, 40.461066, -107.584372, 40.474914]	GF5A	460.86	76.5122	1.35	0.179536	48	885.885	99349.9	GF5A_AHSI_W107.6_N40.7_20240606_007957_L10000134130	Craig_20240606	Craig	20240606	CO	-07	0	-1	0.7		12.4624	64.0498	8.11624	6.97849	163.098	73.3939	1.12248	0.0434312	6021	497.9	547.3	453.181	0.0169436	0.0169436
9	40.4627	-107.591	1939	2024-06-13 20:03:23	2024-06-13 13:03:23	Electricity Generation (1.A.1.a.i)	CO2	RMFa	[-107.591571, 40.458482, -107.582726, 40.465034]	GF5A	978.512	148.473	4	0.426185	273	538.418	71193.9	GF5A_AHSI_W107.8_N40.2_20240613_008059_L10000136449	Craig_20240613	Craig	20240613	CO	-07	0	-1	0.7		32.7641	115.709	12.7069	11.7735	154.825	206.434	1.91596	0.0439935	6021	1002.9	1051.9	912.038	0.0728849	0.0728849
45	40.4627	-107.591	1939	2022-10-18 18:11:02	2022-10-18 11:11:02	Electricity Generation (1.A.1.a.i)	CO2	RMFa	[-107.593320, 40.451999, -107.548598, 40.487137]	GF5B	825.052	123.962	1.63	0.911281	281	2143.83	297999	GF5B_AHSI_W107.8_N40.7_20221018_005924_L10000222668	Craig_20221018	Craig	20221018	CO	-07	0	1	1		9.07654	114.885	6.52094	6.19764	4.11595	2.23633	1.5061	0.0565375	6021	830.6	831.6	753.674	0.0947061	0.0947061
46	40.4627	-107.591	1939	2023-09-26 18:12:39	2023-09-26 11:12:39	Electricity Generation (1.A.1.a.i)	CO2	RMFa	[-107.596528, 40.460441, -107.572172, 40.482187]	GF5B	719.974	109.897	1.1	0.943946	265	1409.69	263730	GF5B_AHSI_W107.5_N40.2_20230926_010921_L10000396892	Craig_20230926	Craig	20230926	CO	-07	0	-1	0.7		10.0318	99.8649	7.84655	7.27339	15.8608	5.81564	1.06515	0.05215	6021	761.2	909.1	717.384	0.00361077	0.00361077
47	40.4627	-107.591	1939	2024-01-13 18:13:26	2024-01-13 11:13:26	Electricity Generation (1.A.1.a.i)	CO2	RMFa	[-107.598263, 40.456196, -107.580838, 40.466651]	GF5B	755.962	204.446	2.08	0.161658	55	740.785	113629	GF5B_AHSI_W107.6_N40.7_20240113_012509_L10000452553	Craig_20240113	Craig	20240113	CO	-07	0	-1	0.7		22.8523	181.594	15.5445	7.11087	139.467	96.6971	1.87906	0.0431313	6021	1143.7	1144.1	1037.63	0.27145	-0.27145
84	40.4627	-107.591	1939	2023-07-15 18:14:00	2023-07-15 11:14:00	Electricity Generation (1.A.1.a.i)	CO2	RMFa	[-107.592094, 40.461049, -107.549321, 40.483315]	ZY1E	1064.54	193.017	2.81	0.76173	274	1456.3	255595	ZY1E_AHSI_W107.63_N40.60_20230715_020127_L1A0000628485	Craig_20230715	Craig	20230715	CO	-07	0	-1	0.7		14.5695	178.448	7.08408	7.48529	173.007	162.05	1.28499	0.0421625	6021	892.4	903.4	811.9	0.311176	0.311176
85	40.4627	-107.591	1939	2023-10-07 18:11:00	2023-10-07 11:11:00	Electricity Generation (1.A.1.a.i)	CO2	RMFa	[-107.594438, 40.459166, -107.574226, 40.471762]	ZY1E	447.58	74.1459	1.36	0.706329	287	870.662	94588.8	ZY1E_AHSI_W107.47_N40.60_20231007_021332_L1A0000663395	Craig_20231007	Craig	20231007	CO	-07	0	-1	0.7		11.9371	62.2088	8.62926	3.78147	3.93013	1.78166	1.14322	0.0556	6021	487.2	518.1	447.12	0.00102939	0.00102939
39	34.4236	-92.1392	93	2024-06-14 19:05:28	2024-06-14 13:05:28	Electricity Generation (1.A.1.a.i)	CO2	RMFa	[-92.142350, 34.399909, -92.122389, 34.423555]	GF5A	719.623	119.198	1.86	0.525198	36	1042.96	161689	GF5A_AHSI_W92.0_N34.3_20240614_008073_L10000136769	White Bluff_20240614	White Bluff	20240614	AR	-06	0	-1	0.7		18.8532	100.344	9.41628	8.67738	99.2047	61.5069	1.50745	0.0392125	6009	927.4	927.3	841.316	0.144645	-0.144645
132	34.4236	-92.1392	93	2022-01-13 17:14:27	2022-01-13 11:14:27	Electricity Generation (1.A.1.a.i)	CO2	RMFa	[-92.150734, 34.417032, -92.111426, 34.437736]	ZY1E	840.238	200.631	2.28	0.205183	255	1516.93	241609	ZY1E_AHSI_W92.11_N34.40_20220113_012261_L1A0000391521	White Bluff_20220113	White Bluff	20220113	AR	-06	0	-1	0.7		21.0584	179.573	10.9839	8.51252	120.971	91.9379	1.42443	0.0509625	6009	901.3	897.1	816.757	0.02875	0.02875
134	34.4236	-92.1392	93	2022-07-26 17:12:13	2022-07-26 11:12:13	Electricity Generation (1.A.1.a.i)	CO2	RMFa	[-92.142261, 34.422451, -92.107479, 34.446399]	ZY1E	1444.27	239.461	3.26	0.219317	227	1425.06	310575	ZY1E_AHSI_W91.94_N34.40_20220726_015044_L1A0000481359	White Bluff_20220726	White Bluff	20220726	AR	-06	0	-1	0.7		32.1998	207.261	12.9651	6.4823	162.055	176.099	1.6881	0.0465062	6009	1389.4	1742.2	1324.45	0.0904623	0.0904623
135	34.4236	-92.1392	93	2023-11-04 17:03:42	2023-11-04 11:03:42	Electricity Generation (1.A.1.a.i)	CO2	RMFa	[-92.147950, 34.412935, -92.134265, 34.431182]	ZY1E	432.901	75.9623	0.86	0.250599	234	811.465	115865	ZY1E_AHSI_W92.33_N34.40_20231104_021729_L1A0000674441	White Bluff_20231104	White Bluff	20231104	AR	-06	0	1	1		16.0457	59.9166	11.5296	5.29441	105.856	30.3454	0.939075	0.0518812	6009	537.3	433.2	482.708	0.103184	-0.103184

## Sheet: 2025.1.9
id	latitude	longitude	altitude	datetime	local_datetime	ipcc_sector	gas	algorithm	plume_bounds	platform	emission	emission_uncertainty	wind_speed	wind_speed_std	wind_direction	filename	foldername	facility	date	state	timezone	extraction	plume_quality	remarks	uncertainty_ime_part	uncertainty_wind_part	inversion_std	ratio_plume_bkg	wind_direction_offset	wind_deviation	ratio_rgb_outlier	id_epa_facility	q_former	q_latter	emission_epa	quantification_error
1	40.4627	-107.591	1939	2019-08-02 20:08:09	2019-08-02 13:08:09	Electricity Generation (1.A.1.a.i)	CO2	RMF		GF5	1544.82	255.483	3.26			GF5_AHSI_W107.84_N40.19_20190803_006569_L10000052859	Craig_20190802	Craig	20190803	CO	-07	-1	0.7		37.3465	218.136	16.8162	8.53903	1.00418	1.0912	0.0762875	6021	1356.3	1381	1233.4	0.252486
2	39.1747	-111.029	1725	2019-11-17 20:20:29	2019-11-17 13:20:29	Electricity Generation (1.A.1.a.i)	CO2	RMF		GF5	832.967	99.8835	0.91			GF5_AHSI_W111.09_N39.21_20191118_008126_L10000065664	Hunter_20191118	Hunter	20191118	UT	-07	-1	0.7		10.64	89.2435	9.07213	4.68331	160.343	48.6375	0.0379813	6165	889	885.7	805.489	0.0341127
3	38.5847	-85.4117	144	2019-12-24 18:36:43	2019-12-24 13:36:43	Electricity Generation (1.A.1.a.i)	CO2	RMF		GF5	837.032	102.85	1.06			GF5_AHSI_W85.14_N38.72_20191225_008664_L10000068784	Trimble County_20191225	Trimble County	20191225	KY	-05	1	1		12.2065	90.6435	8.57702	6.46667	76.5812	27.0587	0.0293375	6071	1037.4	1080.8	964.737	0.132372
4	47.3714	-101.834	590	2024-08-23 19:29:30	2024-08-23 13:29:30	Electricity Generation (1.A.1.a.i)	CO2	RMF		GF5A	641.71	102.227	6.29			GF5A_AHSI_W101.6_N47.5_20240823_009093_L10000162368	Antelope Valley_20240823	Antelope Valley	20240823	ND	-06	1	1		49.7947	52.4321	14.3295	5.08699	137.522	288.339	0.0573063	6469	988.6	878.5	848.567	0.243772
5	47.3714	-101.834	590	2024-08-30 19:31:07	2024-08-30 13:31:07	Electricity Generation (1.A.1.a.i)	CO2	RMF		GF5A	746.753	118.167	4.4			GF5A_AHSI_W102.1_N47.6_20240830_009196_L10000164953	Antelope Valley_20240830	Antelope Valley	20240830	ND	-06	-1	0.7		38.005	80.1619	12.0011	3.67416	173.639	254.67	0.0449375	6469	538	546.6	492.096	0.517494
6	40.4627	-107.591	1939	2023-12-06 20:05:46	2023-12-06 13:05:46	Electricity Generation (1.A.1.a.i)	CO2	RMF		GF5A	780.748	101.378	0.92			GF5A_AHSI_W107.6_N40.7_20231206_005292_L10000072037	Craig_20231206	Craig	20231206	CO	-07	-1	0.7		17.6677	83.7107	14.9327	4.10681	40.0655	12.2868	0.0438375	6021	892.1	893.5	809.405	0.035405
7	40.4627	-107.591	1939	2024-06-06 20:02:05	2024-06-06 13:02:05	Electricity Generation (1.A.1.a.i)	CO2	RMF		GF5A	474.085	65.1359	1.35			GF5A_AHSI_W107.6_N40.7_20240606_007957_L10000134130	Craig_20240606	Craig	20240606	CO	-07	-1	0.7		12.8342	52.3017	8.86614	7.02238	163.287	73.4791	0.0434312	6021	497.9	547.3	453.181	0.0461275
8	40.4627	-107.591	1939	2023-09-16 20:09:27	2023-09-16 13:09:27	Electricity Generation (1.A.1.a.i)	CO2	RMF		GF5A	1265	294.437	2.24			GF5A_AHSI_W107.8_N40.2_20230916_004111_L10000052906	Craig_20230916	Craig	20230916	CO	-07	1	1		23.6818	270.756	13.8098	4.6119	120.903	90.2744	0.0356901	6021	962.5	957.4	872.471	0.449908
9	40.4627	-107.591	1939	2024-06-13 20:03:23	2024-06-13 13:03:23	Electricity Generation (1.A.1.a.i)	CO2	RMF		GF5A	1169.75	171.082	4			GF5A_AHSI_W107.8_N40.2_20240613_008059_L10000136449	Craig_20240613	Craig	20240613	CO	-07	-1	0.7		34.7495	136.332	14.4225	11.5844	114.5	152.667	0.0439935	6021	1002.9	1051.9	912.038	0.282563
10	36.69	-108.481	1630	2023-12-27 20:12:59	2023-12-27 13:12:59	Electricity Generation (1.A.1.a.i)	CO2	RMF		GF5A	608.159	82.5025	4.38			GF5A_AHSI_W108.6_N36.7_20231227_005597_L10000078715	Four Corners Steam Elec Station_20231227	Four Corners Steam Elec Station	20231227	NM	-07	-1	0.7		16.9676	65.5349	6.24215	3.5126	137.839	201.245	0.063725	2442	797	796.8	722.99	0.158828
11	36.69	-108.481	1630	2024-07-11 20:09:06	2024-07-11 13:09:06	Electricity Generation (1.A.1.a.i)	CO2	RMF		GF5A	1634.26	195.604	4.31			GF5A_AHSI_W108.5_N36.7_20240711_008467_L10000146576	Four Corners Steam Elec Station_20240711	Four Corners Steam Elec Station	20240711	NM	-07	1	1		17.0795	178.524	6.25135	7.76358	95.5417	137.262	0.0750688	2442	1414.9	1415.2	1283.62	0.273165
12	36.69	-108.481	1630	2024-04-07 20:11:50	2024-04-07 13:11:50	Electricity Generation (1.A.1.a.i)	CO2	RMF		GF5A	1000.11	145.136	3.47			GF5A_AHSI_W108.8_N36.7_20240407_007083_L10000113789	Four Corners Steam Elec Station_20240407	Four Corners Steam Elec Station	20240407	NM	-07	1	1		12.2592	132.876	4.95653	7.45664	41.9551	48.5281	0.04855	2442	1033.2	1037.1	937.952	0.0662721
13	41.0808	-101.141	948	2023-09-13 19:40:39	2023-09-13 13:40:39	Electricity Generation (1.A.1.a.i)	CO2	RMF		GF5A	1527.69	178.972	4.53			GF5A_AHSI_W100.9_N41.2_20230913_004068_L10000052333	Gerald Gentleman Station_20230913	Gerald Gentleman Station	20230913	NE	-06	1	1		18.9114	160.06	6.18529	6.49617	131.893	199.159	0.0320312	6077	1345.6	1339.6	1217.08	0.255212
14	41.0808	-101.141	948	2024-06-10 19:34:47	2024-06-10 13:34:47	Electricity Generation (1.A.1.a.i)	CO2	RMF		GF5A	1116.36	130.323	8.3			GF5A_AHSI_W100.9_N41.2_20240610_008016_L10000135380	Gerald Gentleman Station_20240610	Gerald Gentleman Station	20240610	NE	-06	-1	0.5		54.0225	76.301	15.1211	10.9217	86.9803	240.646	0.0355375	6077	682.9	683.8	619.979	0.800641
15	41.0808	-101.141	948	2024-02-29 19:37:26	2024-02-29 13:37:26	Electricity Generation (1.A.1.a.i)	CO2	RMF		GF5A	295.872	43.2864	4.3			GF5A_AHSI_W101.1_N41.2_20240229_006530_L10000101560	Gerald Gentleman Station_20240229	Gerald Gentleman Station	20240229	NE	-06	1	1		10.9018	32.3846	3.69524	4.0914	6.0771	8.7105	0.0833813	6077	236	237.4	214.879	0.376924
16	41.0808	-101.141	948	2024-09-27 19:34:25	2024-09-27 13:34:25	Electricity Generation (1.A.1.a.i)	CO2	RMF		GF5A	1334.46	245.334	2.66			GF5A_AHSI_W101.2_N41.2_20240927_009603_L10000174913	Gerald Gentleman Station_20240927	Gerald Gentleman Station	20240927	NE	-06	1	1		11.909	233.425	5.82703	6.94677	30.3649	26.9235	0.0659062	6077	1344	1343.3	1218.9	0.09481
17	35.2972	-101.748	1090	2023-10-18 19:47:26	2023-10-18 13:47:26	Electricity Generation (1.A.1.a.i)	CO2	RMF		GF5A	269.939	31.7358	7.43			GF5A_AHSI_W101.4_N35.3_20231018_004577_L10000059390	Harrington Station_20231018	Harrington Station	20231018	TX	-06	-1	0.5		11.9845	19.7512	3.36537	4.21862	176.839	437.97	0.0384437	6193	153	145.45	133.434	1.02301
18	35.2972	-101.748	1090	2024-04-11 19:44:10	2024-04-11 13:44:10	Electricity Generation (1.A.1.a.i)	CO2	RMF		GF5A	355.397	39.6855	0.14			GF5A_AHSI_W101.6_N35.3_20240411_007143_L10000114980	Harrington Station_20240411	Harrington Station	20240411	TX	-06	1	1		4.22631	35.4591	3.70917	6.27586	114.976	5.36553	0.0495437	6193	635.1	519.6	499.314	0.28823
19	35.2972	-101.748	1090	2023-03-28 19:54:51	2023-03-28 13:54:51	Electricity Generation (1.A.1.a.i)	CO2	RMF		GF5A	613.02	73.9517	1.6			GF5A_AHSI_W101.7_N35.3_20230328_001612_L10000019840	Harrington Station_20230328	Harrington Station	20230328	TX	-06	1	1		5.36099	68.5907	3.26429	4.61273	5.25312	2.80166	0.0283312	6193	482.6	483.5	438.542	0.397859
20	35.2972	-101.748	1090	2024-02-13 19:45:52	2024-02-13 13:45:52	Electricity Generation (1.A.1.a.i)	CO2	RMF		GF5A	189.38	34.8713	3.31			GF5A_AHSI_W101.7_N35.3_20240213_006298_L10000094521	Harrington Station_20240213	Harrington Station	20240213	TX	-06	-1	0.7		8.52924	26.3421	3.6404	4.12972	167.414	184.713	0.0484812	6193	324.6	326.6	295.833	0.35984
21	35.2972	-101.748	1090	2023-09-04 19:50:29	2023-09-04 13:50:29	Electricity Generation (1.A.1.a.i)	CO2	RMF		GF5A	539.946	57.5411	7.75			GF5A_AHSI_W101.9_N35.3_20230904_003936_L10000050446	Harrington Station_20230904	Harrington Station	20230904	TX	-06	1	1		19.064	38.4771	5.06564	4.67825	2.37178	6.12709	0.05045	6193	760.5	701.1	645.008	0.162886
22	39.3844	-80.3325	299	2024-03-12 18:14:51	2024-03-12 13:14:51	Electricity Generation (1.A.1.a.i)	CO2	RMF		GF5A	1139.46	147.81	4.29			GF5A_AHSI_W80.0_N39.2_20240312_006703_L10000103880	Harrison Power Station_20240312	Harrison Power Station	20240312	WV	-05	-1	0.7		22.8427	124.967	7.93278	6.79152	108.609	155.311	0.0412125	3944	1069.7	1073.1	971.135	0.173327
23	39.3844	-80.3325	299	2023-11-15 18:17:57	2023-11-15 13:17:57	Electricity Generation (1.A.1.a.i)	CO2	RMF		GF5A	1631.76	216.585	3.96			GF5A_AHSI_W80.1_N39.2_20231115_004984_L10000065474	Harrison Power Station_20231115	Harrison Power Station	20231115	WV	-05	-1	0.7		24.7006	191.885	9.00685	5.51824	152.61	201.445	0.0430625	3944	1970.3	1977.4	1789.25	0.0880213
24	39.3844	-80.3325	299	2024-03-19 18:16:18	2024-03-19 13:16:18	Electricity Generation (1.A.1.a.i)	CO2	RMF		GF5A	938.887	106.875	5.66			GF5A_AHSI_W80.4_N39.2_20240319_006805_L10000106623	Harrison Power Station_20240319	Harrison Power Station	20240319	WV	-05	-1	0.7		24.171	82.7037	6.78806	4.20272	41.7708	78.8076	0.0414812	3944	1116	1043	994.758	0.0561657
25	39.3844	-80.3325	299	2023-08-19 18:21:53	2023-08-19 13:21:53	Electricity Generation (1.A.1.a.i)	CO2	RMF		GF5A	1461.69	175.673	1.3			GF5A_AHSI_W80.5_N39.2_20230819_003702_L10000047101	Harrison Power Station_20230819	Harrison Power Station	20230819	WV	-05	1	1		14.9042	160.769	9.24066	9.94416	4.08119	1.76852	0.0481688	3944	1369.6	1357.3	1238.57	0.180135
26	39.1747	-111.029	1725	2024-09-28 20:16:35	2024-09-28 13:16:35	Electricity Generation (1.A.1.a.i)	CO2	RMF		GF5A	403.727	59.7247	1.61			GF5A_AHSI_W111.2_N39.2_20240928_009618_L10000175260	Hunter_20240928	Hunter	20240928	UT	-07	1	1		14.5277	45.1971	9.71988	3.71266	148.89	79.9042	0.007	6165	538.7	545.3	490.297	0.176566
27	29.3091	-98.3205	149	2023-08-14 19:42:15	2023-08-14 13:42:15	Electricity Generation (1.A.1.a.i)	CO2	RMF		GF5A	1227.98	149.483	1.7			GF5A_AHSI_W98.5_N29.3_20230814_003630_L10000044804	J K Spruce_20230814	J K Spruce	20230814	TX	-06	1	1	完美	11.3647	138.118	5.90463	13.0267	24.606	13.9434	0.022475	7097	1389.2	1408.7	1272.64	0.0350941
28	29.3091	-98.3205	149	2023-09-20 19:39:18	2023-09-20 13:39:18	Electricity Generation (1.A.1.a.i)	CO2	RMF		GF5A	1396.04	223.368	3.06			GF5A_AHSI_W98.0_N29.3_20230920_004169_L10000053680	J K Spruce_20230920	J K Spruce	20230920	TX	-06	1	1		13.2112	210.156	5.21595	11.3123	11.6499	11.8829	0.0139	7097	1303	1302.6	1181.83	0.181255
29	29.3091	-98.3205	149	2023-12-17 19:38:50	2023-12-17 13:38:50	Electricity Generation (1.A.1.a.i)	CO2	RMF		GF5A	580.484	116.431	2.62			GF5A_AHSI_W98.5_N29.3_20231217_005451_L10000075253	J K Spruce_20231217	J K Spruce	20231217	TX	-06	-1	0.7		13.1528	103.278	5.44311	5.4731	69.7214	60.89	0.0272312	7097	556.7	558	505.777	0.147709
30	41.7378	-108.787	2044	2023-12-13 20:08:54	2023-12-13 13:08:54	Electricity Generation (1.A.1.a.i)	CO2	RMF		GF5A	786.743	120.627	4			GF5A_AHSI_W108.7_N41.7_20231213_005393_L10000074107	Jim Bridger_20231213	Jim Bridger	20231213	WY	-07	1	1		28.9328	91.6938	12.3746	4.24097	89.5278	119.37	0.0471125	8066	1825.9	1677	1638.42	0.519816
31	41.7378	-108.787	2044	2023-09-23 20:11:46	2023-09-23 13:11:46	Electricity Generation (1.A.1.a.i)	CO2	RMF		GF5A	180.638	27.7262	7.1			GF5A_AHSI_W108.8_N41.7_20230923_004213_L10000054221	Jim Bridger_20230923	Jim Bridger	20230923	WY	-07	-1	0.5		14.1182	13.608	4.34858	3.58401	29.0041	68.643	0.0335937	8066	460.9	452.2	416.674	0.566476
32	41.7378	-108.787	2044	2024-08-03 20:04:32	2024-08-03 13:04:32	Electricity Generation (1.A.1.a.i)	CO2	RMF		GF5A	708.526	91.0197	4.27			GF5A_AHSI_W108.6_N41.7_20240803_008802_L10000154428	Jim Bridger_20240803	Jim Bridger	20240803	WY	-07	-1	0.7		13.0036	78.0161	5.13308	6.20308	60.3414	85.8859	0.0390187	8066	1441.8	1634.1	1319.61	0.463078
33	38.3472	-94.6467	263	2023-10-08 19:17:58	2023-10-08 13:17:58	Electricity Generation (1.A.1.a.i)	CO2	RMF		GF5A	571.487	92.837	3.4			GF5A_AHSI_W94.7_N38.2_20231008_004431_L10000057166	La Cygne_20231008	La Cygne	20231008	KS	-06	-1	0.7		15.4017	77.4353	6.10086	5.98225	123.505	139.972	0.0483437	1241	654.4	647.1	591.785	0.0342998
34	32.2597	-94.5703	98	2023-09-08 19:22:37	2023-09-08 13:22:37	Electricity Generation (1.A.1.a.i)	CO2	RMF		GF5A	3282.43	464.745	3.48			GF5A_AHSI_W94.3_N32.3_20230908_003994_L10000051261	Martin Lake_20230908	Martin Lake	20230908	TX	-06	1	1	有羽流、但周围水汽干扰也很大	29.8365	434.909	10.3527	11.6799	22.4367	26.0266	0.049025	6146	2712.1	2709.3	2459.44	0.334624
35	32.2597	-94.5703	98	2024-02-24 19:19:38	2024-02-24 13:19:38	Electricity Generation (1.A.1.a.i)	CO2	RMF		GF5A	983.351	124.06	1.84			GF5A_AHSI_W94.6_N32.3_20240224_006456_L10000098053	Martin Lake_20240224	Martin Lake	20240224	TX	-06	-1	0.7		12.6851	111.374	6.24763	4.90738	79.414	48.7072	0.0406188	6146	742.7	741.2	673.335	0.460418
36	32.2597	-94.5703	98	2024-04-22 19:19:10	2024-04-22 13:19:10	Electricity Generation (1.A.1.a.i)	CO2	RMF		GF5A	678.391	92.0026	1.28			GF5A_AHSI_W94.8_N32.3_20240422_007301_L10000118547	Martin Lake_20240422	Martin Lake	20240422	TX	-06	-1	0.7		17.479	74.5236	9.80037	5.09303	84.381	36.0025	0.0384437	6146	723.8	716.7	654.581	0.0363751
37	45.3792	-93.8958	292	2024-07-14 19:02:06	2024-07-14 13:02:06	Electricity Generation (1.A.1.a.i)	CO2	RMF		GF5A	1037.22	229.455	2.36			GF5A_AHSI_W94.0_N45.6_20240714_008510_L10000147652	Sherburne County_20240714	Sherburne County	20240714	MN	-06	1	1		21.1093	208.346	10.0444	8.20767	3.07837	2.42165	0.0225125	6090	1646	1631.2	1492.78	0.305175
38	38.5847	-85.4117	144	2024-04-14 18:35:41	2024-04-14 13:35:41	Electricity Generation (1.A.1.a.i)	CO2	RMF		GF5A	1758.43	177.509	5.73			GF5A_AHSI_W85.3_N38.7_20240414_007185_L10000115875	Trimble County_20240414	Trimble County	20240414	KY	-05	1	1		23.9988	153.511	6.67698	12.3829	18.0856	34.5434	0.045275	6071	1297.4	1354.6	1207.25	0.456559
39	34.4236	-92.1392	93	2024-06-14 19:05:28	2024-06-14 13:05:28	Electricity Generation (1.A.1.a.i)	CO2	RMF		GF5A	731.794	101.299	1.86			GF5A_AHSI_W92.0_N34.3_20240614_008073_L10000136769	White Bluff_20240614	White Bluff	20240614	AR	-06	-1	0.7		18.3366	82.9627	9.68779	9.13038	173.421	107.521	0.0392125	6009	927.4	927.3	841.316	0.130179
40	47.371	-101.836	590	2022-06-19 17:51:31	2022-06-19 11:51:31	Electricity Generation (1.A.1.a.i)	CO2	RMF		GF5B	1272.26	172.296	4.53			GF5B_AHSI_W101.6_N47.5_20220619_004161_L10000151101	Antelope Valley_20220619	Antelope Valley	20220619	ND	-06	-1	0		38.9984	133.298	11.9362	3.41855	127.072	191.879	0.0873063	6469	522.7	565.6	507.266	1.50807
41	47.371	-101.836	590	2022-03-16 17:50:55	2022-03-16 11:50:55	Electricity Generation (1.A.1.a.i)	CO2	RMF		GF5B	672.202	81.5306	9.18			GF5B_AHSI_W102.0_N47.5_20220316_002777_L10000118963	Antelope Valley_20220316	Antelope Valley	20220316	ND	-06	-1	0		38.2061	43.3245	9.7894	7.49039	80.7576	247.118	0.0418625	6469	560.6	524.1	480.974	0.397583
42	47.371	-101.836	590	2022-06-26 17:53:27	2022-06-26 11:53:27	Electricity Generation (1.A.1.a.i)	CO2	RMF		GF5B	623.459	95.0225	6.59			GF5B_AHSI_W102.1_N47.5_20220626_004263_L10000154923	Antelope Valley_20220626	Antelope Valley	20220626	ND	-06	1	1	能看见一点	45.6791	49.3433	12.5443	4.20348	9.99462	21.9548	0.0692062	6469	667	827.8	733.949	0.150541
43	47.3714	-101.834	590	2023-01-30 17:57:28	2023-01-30 11:57:28	Electricity Generation (1.A.1.a.i)	CO2	RMF		GF5B	1266.65	206.596	4.48			GF5B_AHSI_W102.0_N47.5_20230130_007439_L10000282305	Antelope Valley_20230130	Antelope Valley	20230130	ND	-06	-1	0.7		72.6579	133.938	25.6654	3.54035	163.538	244.216	0.0676563	6469	1034.6	1033.4	937.539	0.351042
44	47.3714	-101.834	590	2024-06-23 17:57:48	2024-06-23 11:57:48	Electricity Generation (1.A.1.a.i)	CO2	RMF		GF5B	1088.83	258.926	2.28			GF5B_AHSI_W102.1_N47.5_20240623_014869_L10000537123	Antelope Valley_20240623	Antelope Valley	20240623	ND	-06	-1	0.7		30.8945	228.031	14.6558	6.11031	117.537	89.3283	0.0827937	6469	1055.5	1045.9	949.26	0.147026
45	40.4627	-107.591	1939	2023-09-26 18:12:39	2023-09-26 11:12:39	Electricity Generation (1.A.1.a.i)	CO2	RMF		GF5B	852.217	104.368	1.1			GF5B_AHSI_W107.5_N40.2_20230926_010921_L10000396892	Craig_20230926	Craig	20230926	CO	-07	-1	0.7		11.8292	92.5392	8.56715	7.36248	16.0703	5.89245	0.05215	6021	761.2	909.1	717.384	0.187952
46	40.4627	-107.591	1939	2022-10-18 18:11:02	2022-10-18 11:11:02	Electricity Generation (1.A.1.a.i)	CO2	RMF		GF5B	957.702	117.737	1.63			GF5B_AHSI_W107.8_N40.7_20221018_005924_L10000222668	Craig_20221018	Craig	20221018	CO	-07	1	1	两个源	10.4093	107.328	7.11936	6.2139	3.98094	2.16298	0.0565375	6021	830.6	831.6	753.674	0.270711
47	40.4627	-107.591	1939	2024-01-13 18:13:26	2024-01-13 11:13:26	Electricity Generation (1.A.1.a.i)	CO2	RMF		GF5B	864.429	229.116	2.08			GF5B_AHSI_W107.6_N40.7_20240113_012509_L10000452553	Craig_20240113	Craig	20240113	CO	-07	-1	0.7		25.9193	203.196	16.9289	7.11332	142.891	99.0712	0.0431313	6021	1143.7	1144.1	1037.63	0.166917
48	36.69	-108.481	1630	2022-06-10 18:06:07	2022-06-10 11:06:07	Electricity Generation (1.A.1.a.i)	CO2	RMF		GF5B	1313.91	216.588	2.97			GF5B_AHSI_W108.2_N36.7_20220610_004030_L10000145798	Four Corners Steam Elec Station_20220610	Four Corners Steam Elec Station	20220610	NM	-07	1	1	完美	12.5694	204.018	5.63675	12.1177	0.998694	0.988708	0.0724875	2442	1471.5	1052.86	1296.94	0.013084
49	36.69	-108.481	1630	2022-04-20 18:05:10	2022-04-20 11:05:10	Electricity Generation (1.A.1.a.i)	CO2	RMF		GF5B	615.623	136.572	2.3			GF5B_AHSI_W108.3_N36.7_20220420_003287_L10000117219	Four Corners Steam Elec Station_20220420	Four Corners Steam Elec Station	20220420	NM	-07	1	1	有排放	9.00834	127.563	4.82815	5.58266	162.266	124.404	0.0774625	2442	539.3	621.1	495.429	0.242607
50	36.69	-108.481	1630	2024-01-06 18:12:33	2024-01-06 11:12:33	Electricity Generation (1.A.1.a.i)	CO2	RMF		GF5B	1221.5	156.579	1.32			GF5B_AHSI_W108.3_N36.7_20240106_012407_L10000448627	Four Corners Steam Elec Station_20240106	Four Corners Steam Elec Station	20240106	NM	-07	-1	0.7		22.0637	134.515	15.9322	7.16413	9.27573	4.08132	0.0707125	2442	1357.4	1191	1201.22	0.0168834
51	41.0808	-101.141	948	2022-06-28 17:41:40	2022-06-28 11:41:40	Electricity Generation (1.A.1.a.i)	CO2	RMF		GF5B	850.626	105.678	2			GF5B_AHSI_W100.9_N41.2_20220628_004292_L10000156032	Gerald Gentleman Station_20220628	Gerald Gentleman Station	20220628	NE	-06	-1	0.7	24波段可见排放，有排放，但是算不准，靠近湖边	8.61435	97.0637	4.79302	17.4102	33.3561	22.2374	0.0338313	6077	1314.5	1320.1	1195.97	0.288754
52	41.0808	-101.141	948	2021-12-20 17:37:21	2021-12-20 11:37:21	Electricity Generation (1.A.1.a.i)	CO2	RMF		GF5B	600.608	81.0337	4.12			GF5B_AHSI_W101.1_N41.2_20211220_001524_L10000044164	Gerald Gentleman Station_20211220	Gerald Gentleman Station	20211220	NE	-06	1	1		12.8281	68.2056	4.86762	4.67926	52.4801	72.0727	0.0158875	6077	1201.3	1283	1135.51	0.471066
53	41.0808	-101.141	948	2022-06-28 17:41:40	2022-06-28 11:41:40	Electricity Generation (1.A.1.a.i)	CO2	RMF		GF5B	850.626	105.678	2			GF5B_AHSI_W100.9_N41.2_20220628_004292_L10000156032	Gerald Gentleman Station_20220628	Gerald Gentleman Station	20220628	NE	-06	-1	0.7		8.61435	97.0637	4.79302	17.4102	33.3561	22.2374	0.0338313	6077	1314.5	1320.1	1195.97	0.288754
54	35.2972	-101.748	1090	2022-04-24 17:38:35	2022-04-24 11:38:35	Electricity Generation (1.A.1.a.i)	CO2	RMF		GF5B	363.425	41.7495	6.66			GF5B_AHSI_W101.9_N35.3_20220424_003345_L10000118254	Harrington Station_20220424	Harrington Station	20220424	TX	-06	-1	0.5		13.1903	28.5591	3.88651	3.73307	17.6714	39.2305	0.0448812	6193	296.2	292.8	266.755	0.362395
55	35.2972	-101.748	1090	2024-03-01 17:44:39	2024-03-01 11:44:39	Electricity Generation (1.A.1.a.i)	CO2	RMF		GF5B	194.154	35.1904	4.22			GF5B_AHSI_W101.7_N35.3_20240301_013208_L10000477342	Harrington Station_20240301	Harrington Station	20240301	TX	-06	-1	0		13.5951	21.5953	4.67309	2.72557	126.835	178.414	0.043975	6193	142.7	143.5	129.987	0.493637
56	35.2972	-101.748	1090	2022-04-24 17:38:35	2022-04-24 11:38:35	Electricity Generation (1.A.1.a.i)	CO2	RMF		GF5B	363.425	41.7495	6.66			GF5B_AHSI_W101.9_N35.3_20220424_003345_L10000118254	Harrington Station_20220424	Harrington Station	20220424	TX	-06	-1	0.7		13.1903	28.5591	3.88651	3.73307	17.6714	39.2305	0.0448812	6193	296.2	292.8	266.755	0.362395
57	35.2972	-101.748	1090	2024-01-10 17:45:52	2024-01-10 11:45:52	Electricity Generation (1.A.1.a.i)	CO2	RMF		GF5B	466.72	53.4789	7			GF5B_AHSI_W101.9_N35.3_20240110_012465_L10000450920	Harrington Station_20240110	Harrington Station	20240110	TX	-06	-1	0		17.9931	35.4858	5.70755	3.92516	173.211	404.16	0.0435875	6193	152.9	152.8	138.641	2.36641
58	39.3844	-80.3325	299	2023-10-12 16:23:33	2023-10-12 11:23:33	Electricity Generation (1.A.1.a.i)	CO2	RMF		GF5B	391.725	56.741	0.73			GF5B_AHSI_W80.4_N39.2_20231012_011153_L10000404427	Harrison Power Station_20231012	Harrison Power Station	20231012	WV	-05	-1	0.5	伪排放	15.3547	41.3863	11.2241	8.25406	85.0392	20.6929	0.0482375	3944	229.9	228.3	208.005	0.883243
59	39.3844	-80.3325	299	2024-03-13 16:22:14	2024-03-13 11:22:14	Electricity Generation (1.A.1.a.i)	CO2	RMF		GF5B	1114.27	218.347	2.58			GF5B_AHSI_W80.2_N39.2_20240313_013382_L10000483618	Harrison Power Station_20240313	Harrison Power Station	20240313	WV	-05	-1	0.7		16.6216	201.726	7.26946	9.17965	19.6097	16.8644	0.063475	3944	1067.4	1067.2	968.262	0.150793
60	39.3844	-80.3325	299	2024-01-22 16:23:19	2024-01-22 11:23:19	Electricity Generation (1.A.1.a.i)	CO2	RMF		GF5B	1441.33	348.784	2.15			GF5B_AHSI_W80.4_N39.2_20240122_012639_L10000457433	Harrison Power Station_20240122	Harrison Power Station	20240122	WV	-05	-1	0.7		24.0401	324.744	12.6602	4.88978	158.937	113.905	0.059925	3944	1467.2	1460.1	1328.55	0.0848885
61	39.1747	-111.029	1725	2022-04-18 18:17:59	2022-04-18 11:17:59	Electricity Generation (1.A.1.a.i)	CO2	RMF		GF5B	663.185	75.7678	0.6			GF5B_AHSI_W110.9_N39.2_20220418_003258_L10000114473	Hunter_20220418	Hunter	20220418	UT	-07	-1	0.7	低风速	6.46636	69.3014	5.24596	8.79682	13.4157	2.68314	0.0246625	6165	909.6	899.7	822.631	0.193824
62	39.1747	-111.029	1725	2024-01-04 18:25:25	2024-01-04 11:25:25	Electricity Generation (1.A.1.a.i)	CO2	RMF		GF5B	584.059	71.9252	0.6			GF5B_AHSI_W110.9_N39.2_20240104_012378_L10000447404	Hunter_20240104	Hunter	20240104	UT	-07	-1	0.5		10.8923	61.0329	9.25425	5.53036	164.418	32.8835	0.0612625	6165	353.2	352.6	320.191	0.824096
63	29.3091	-98.3205	149	2024-02-04 17:25:53	2024-02-04 11:25:53	Electricity Generation (1.A.1.a.i)	CO2	RMF		GF5B	881.794	84.5898	8.28			GF5B_AHSI_W98.2_N29.3_20240204_012829_L10000463990	J K Spruce_20240204	J K Spruce	20240204	TX	-06	-1	0.5		24.2339	60.3559	6.14357	4.08228	14.8908	41.0987	0.032375	7097	534.5	536.5	485.646	0.815712
64	29.3091	-98.3205	149	2024-02-11 17:27:36	2024-02-11 11:27:36	Electricity Generation (1.A.1.a.i)	CO2	RMF		GF5B	694.023	84.6442	5.79			GF5B_AHSI_W98.6_N29.3_20240211_012931_L10000467494	J K Spruce_20240211	J K Spruce	20240211	TX	-06	1	1		24.5127	60.1315	7.4029	4.10638	129.583	250.096	0.0255125	7097	559.5	524.3	493.2	0.407183
65	41.7378	-108.787	2044	2022-02-12 18:10:06	2022-02-12 11:10:06	Electricity Generation (1.A.1.a.i)	CO2	RMF		GF5B	889.996	110.012	4.49			GF5B_AHSI_W108.8_N41.7_20220212_002311_L10000077220	Jim Bridger_20220212	Jim Bridger	20220212	WY	-07	1	1	有排放，但周围噪声明显更大，不适合反演	16.0768	93.9354	6.11913	7.00465	82.2714	123.133	0.0355562	8066	580.1	545	520.951	0.708407
66	41.7378	-108.787	2044	2023-10-31 18:20:04	2023-10-31 11:20:04	Electricity Generation (1.A.1.a.i)	CO2	RMF		GF5B	1071.42	107.445	6.01			GF5B_AHSI_W109.0_N41.6_20231031_011431_L10000413197	Jim Bridger_20231031	Jim Bridger	20231031	WY	-07	-1	0.7		17.064	90.3814	5.68249	5.91724	48.7785	97.7196	0.0386625	8066	1208.8	1174.8	1086.32	0.0137214
67	41.7378	-108.787	2044	2023-12-21 18:20:37	2023-12-21 11:20:37	Electricity Generation (1.A.1.a.i)	CO2	RMF		GF5B	585.226	104.899	3.18			GF5B_AHSI_W109.1_N41.6_20231221_012174_L10000440228	Jim Bridger_20231221	Jim Bridger	20231221	WY	-07	1	1		20.1834	84.7155	9.8608	4.16843	170.105	180.311	0.0353	8066	994.7	868	864.063	0.322705
68	38.3472	-94.6467	263	2022-10-19 17:15:33	2022-10-19 11:15:33	Electricity Generation (1.A.1.a.i)	CO2	RMF		GF5B	463.681	95.3591	2.6			GF5B_AHSI_W94.5_N38.2_20221019_005938_L10000223276	La Cygne_20221019	La Cygne	20221019	KS	-06	-1	0.7	32波段可见排放源	12.1465	83.2127	5.00181	6.30329	160.814	139.372	0.062575	1241	708.8	713.2	644.01	0.280011
69	32.2597	-94.5703	98	2023-11-03 17:12:54	2023-11-03 11:12:54	Electricity Generation (1.A.1.a.i)	CO2	RMF		GF5B	1362.69	296.402	2.34			GF5B_AHSI_W94.3_N32.3_20231103_011474_L10000414550	Martin Lake_20231103	Martin Lake	20231103	TX	-06	-1	0.7	有羽流，水面噪声大	19.8692	276.533	9.52309	6.62079	43.7369	34.1148	0.0438562	6146	1488.1	1487.9	1349.95	0.00944042
70	32.2597	-94.5703	98	2022-04-07 17:05:50	2022-04-07 11:05:50	Electricity Generation (1.A.1.a.i)	CO2	RMF		GF5B	1328.55	139.518	6.16			GF5B_AHSI_W94.5_N32.3_20220407_003097_L10000107611	Martin Lake_20220407	Martin Lake	20220407	TX	-06	-1	0.7		29.3761	110.142	7.74544	6.98061	36	73.92	0.04465	6146	1469.4	1514	1336.39	0.00586396
71	32.2597	-94.5703	98	2024-04-04 17:12:16	2024-04-04 11:12:16	Electricity Generation (1.A.1.a.i)	CO2	RMF		GF5B	1928.69	292.729	3.31			GF5B_AHSI_W94.3_N32.3_20240404_013703_L10000494997	Martin Lake_20240404	Martin Lake	20240404	TX	-06	-1	0.7		24.4559	268.273	8.67321	11.6365	82.4111	90.927	0.0385187	6146	1103	1115	1002.8	0.9233
72	32.2597	-94.5703	98	2023-09-06 17:13:22	2023-09-06 11:13:22	Electricity Generation (1.A.1.a.i)	CO2	RMF		GF5B	1910.32	348.401	2.72			GF5B_AHSI_W94.4_N32.3_20230906_010629_L10000386730	Martin Lake_20230906	Martin Lake	20230906	TX	-06	-1	0.7		22.4054	325.996	9.25999	7.09863	13.8401	12.5484	0.0471312	6146	2665.3	2675.5	2419.92	0.210586
73	32.2597	-94.5703	98	2024-02-13 17:13:08	2024-02-13 11:13:08	Electricity Generation (1.A.1.a.i)	CO2	RMF		GF5B	1665.16	199.183	1.3			GF5B_AHSI_W94.4_N32.3_20240213_012960_L10000468942	Martin Lake_20240213	Martin Lake	20240213	TX	-06	-1	0.7		16.0345	183.148	9.09611	5.53475	158.532	68.6973	0.0434063	6146	1097.1	1103.7	996.57	0.670889
74	32.2597	-94.5703	98	2023-07-17 17:13:09	2023-07-17 11:13:09	Electricity Generation (1.A.1.a.i)	CO2	RMF		GF5B	2759.44	353.617	3.97			GF5B_AHSI_W94.5_N32.1_20230717_009886_L10000361780	Martin Lake_20230717	Martin Lake	20230717	TX	-06	-1	0.7		29.8526	323.765	10.2314	10.9841	58.4662	77.3702	0.0504062	6146	2491.4	2702.3	2301.61	0.198914
75	32.2597	-94.5703	98	2024-06-01 17:13:43	2024-06-01 11:13:43	Electricity Generation (1.A.1.a.i)	CO2	RMF		GF5B	935.909	124.288	1.53			GF5B_AHSI_W94.8_N32.3_20240601_014548_L10000524560	Martin Lake_20240601	Martin Lake	20240601	TX	-06	-1	0.7		19.9655	104.322	12.0335	7.34456	168.96	86.1696	0.0445625	6146	647.8	634	584.962	0.599949
76	31.185	-96.4853	129	2022-10-19 17:17:28	2022-10-19 11:17:28	Electricity Generation (1.A.1.a.i)	CO2	RMF		GF5B	1959.27	233.938	1.55			GF5B_AHSI_W96.5_N31.3_20221019_005938_L10000223290	Oak Grove_20221019	Oak Grove	20221019	TX	-06	-1	0.7	有排放	15.3063	218.632	7.74811	15.9355	46.4769	24.0131	0.0297437	6180	1788.5	1803.2	1626.28	0.204759
77	29.9172	-96.7506	115	2022-10-19 17:17:53	2022-10-19 11:17:53	Electricity Generation (1.A.1.a.i)	CO2	RMF		GF5B	853.344	164.137	2.61			GF5B_AHSI_W96.9_N29.8_20221019_005938_L10000223293	Sam Seymour_20221019	Sam Seymour	20221019	TX	-06	-1	0.7		11.6571	152.48	4.49569	6.36253	157.782	137.27	0.0209875	6179	964.3	979	878.577	0.0287194
78	37.1517	-88.775	105	2023-12-12 16:54:21	2023-12-12 10:54:21	Electricity Generation (1.A.1.a.i)	CO2	RMF		GF5B	765.836	98.6237	1.77			GF5B_AHSI_W88.6_N37.1_20231212_012042_L10000435322	Shawnee_20231212	Shawnee	20231212	KY	-06	-1	0.7	羽流飘到了水面上，水汽干扰大	12.1814	86.4423	6.75291	5.07017	129.663	76.5014	0.0422063	1379	943.299	928	843.255	0.0918096
79	37.1517	-88.775	105	2022-03-26 16:46:28	2022-03-26 10:46:28	Electricity Generation (1.A.1.a.i)	CO2	RMF		GF5B	934.195	103.691	5.61			GF5B_AHSI_W88.6_N37.2_20220326_002922_L10000100107	Shawnee_20220326	Shawnee	20220326	KY	-06	-1	0.7	羽流飘到了水面上，水汽干扰大	20.8622	82.8285	5.57866	4.91551	162.886	304.597	0.0356438	1379	811.401	780.998	714.945	0.306667
80	37.1517	-88.775	105	2023-08-25 16:54:41	2023-08-25 10:54:41	Electricity Generation (1.A.1.a.i)	CO2	RMF		GF5B	1157.35	230.534	2.61			GF5B_AHSI_W88.7_N37.2_20230825_010454_L10000380643	Shawnee_20230825	Shawnee	20230825	KY	-06	-1	0.7	有排放，圆形，无羽流形状	23.7326	206.801	10.0136	7.87344	118.857	103.406	0.0513438	1379	1266.6	1261.2	1144.63	0.0111123
81	45.3792	-93.8958	292	2022-06-02 17:19:01	2022-06-02 11:19:01	Electricity Generation (1.A.1.a.i)	CO2	RMF		GF5B	569.558	81.2547	4.82			GF5B_AHSI_W94.2_N45.6_20220602_003913_L10000141558	Sherburne County_20220602	Sherburne County	20220602	MN	-06	-1	0.7		24.5175	56.7373	7.57318	3.45015	54.1627	87.0213	0.036	6090	411.9	411.2	373.468	0.525049
82	38.5847	-85.4117	144	2023-10-31 16:42:01	2023-10-31 11:42:01	Electricity Generation (1.A.1.a.i)	CO2	RMF		GF5B	992.23	168.901	3.2			GF5B_AHSI_W85.2_N38.7_20231031_011430_L10000413176	Trimble County_20231031	Trimble County	20231031	KY	-05	-1	0.5	探测到了，但算的不准（该案例说明GF5的探测下限达到256t/h, 3m/s）	26.171	142.73	9.6528	5.90156	36.4664	38.8975	0.048225	6071	278.2	284.99	256.691	2.86547
83	38.5847	-85.4117	144	2023-07-14 16:42:09	2023-07-14 11:42:09	Electricity Generation (1.A.1.a.i)	CO2	RMF		GF5B	1450.72	182.087	1.52			GF5B_AHSI_W85.3_N38.7_20230714_009842_L10000360353	Trimble County_20230714	Trimble County	20230714	KY	-05	1	1		20.4702	161.616	11.4319	7.95761	16.6218	8.42173	0.052025	6071	1373.5	1399.05	1262.24	0.149317
84	34.4236	-92.1392	93	2023-10-06 17:05:59	2023-10-06 11:05:59	Electricity Generation (1.A.1.a.i)	CO2	RMF		GF5B	510.752	112.23	2.8			GF5B_AHSI_W92.2_N34.3_20231006_011066_L10000401605	White Bluff_20231006	White Bluff	20231006	AR	-06	-1	0.5		27.7865	84.4438	12.9888	4.8617	60.2811	56.2624	0.0541813	6009	320	380.1	294.843	0.732287
85	47.371	-101.836	590	2020-11-23 18:05:58	2020-11-23 12:05:58	Electricity Generation (1.A.1.a.i)	CO2	RMF		ZY1E	417.25	53.9557	6.44			ZY1E_AHSI_W101.95_N47.64_20201123_006296_L1A0000193277	Antelope Valley_20201123	Antelope Valley	20201123	ND	-06	-1	0	这一景还是不太好反演	20.4119	33.5438	7.23912	8.15057	22.4736	48.2433	0.0541688	6469	372.7	365.9	337.594	0.235954
86	40.4627	-107.591	1939	2023-10-07 18:11:00	2023-10-07 11:11:00	Electricity Generation (1.A.1.a.i)	CO2	RMF		ZY1E	516.639	70.7507	1.36			ZY1E_AHSI_W107.47_N40.60_20231007_021332_L1A0000663395	Craig_20231007	Craig	20231007	CO	-07	1	1	有排放 不像羽流	13.7204	57.0303	9.39571	3.83911	4.05055	1.83625	0.0556	6021	487.2	518.1	447.12	0.155482
87	40.4627	-107.591	1939	2023-07-15 18:14:00	2023-07-15 11:14:00	Electricity Generation (1.A.1.a.i)	CO2	RMF		ZY1E	1197.34	213.476	2.81			ZY1E_AHSI_W107.63_N40.60_20230715_020127_L1A0000628485	Craig_20230715	Craig	20230715	CO	-07	-1	0.7	19波段较好	16.2778	197.198	7.72764	7.4937	172.558	161.63	0.0421625	6021	892.4	903.4	811.9	0.474744
88	36.69	-108.481	1630	2020-09-17 18:19:28	2020-09-17 11:19:28	Electricity Generation (1.A.1.a.i)	CO2	RMF		ZY1E	1435.49	255.788	2.71			ZY1E_AHSI_W108.64_N36.61_20200917_005334_L1A0000154763	Four Corners Steam Elec Station_20200917	Four Corners Steam Elec Station	20200917	NM	-07	1	1	羽流形状好	9.82525	245.963	4.62185	6.65403	71.6126	64.6901	0.07115	2442	1507.6	1506	1367.21	0.0499404
89	36.69	-108.481	1630	2023-10-07 18:12:07	2023-10-07 11:12:07	Electricity Generation (1.A.1.a.i)	CO2	RMF		ZY1E	1060.45	127.023	1.7			ZY1E_AHSI_W108.72_N36.61_20231007_021332_L1A0000663404	Four Corners Steam Elec Station_20231007	Four Corners Steam Elec Station	20231007	NM	-07	1	1	羽流很完整，可以作为案例	7.74829	119.275	4.79945	11.5649	16.847	9.54663	0.075475	2442	1532.3	1509.9	1386.01	0.234893
90	36.3156	-86.4006	140	2022-03-27 16:51:51	2022-03-27 10:51:51	Electricity Generation (1.A.1.a.i)	CO2	RMF		ZY1E	286.939	75.9796	2.48			ZY1E_AHSI_W86.17_N36.17_20220327_013308_L1A0000425155	Gallatin_20220327	Gallatin	20220327	TN	-06	-1	0.5		21.6186	54.361	9.50697	2.63933	76.3407	63.1083	0.027275	3403	307	306.4	278.043	0.031994
91	36.3156	-86.4006	140	2022-10-04 16:51:33	2022-10-04 10:51:33	Electricity Generation (1.A.1.a.i)	CO2	RMF		ZY1E	791.633	109.13	1.48			ZY1E_AHSI_W86.59_N36.17_20221004_016048_L1A0000511602	Gallatin_20221004	Gallatin	20221004	TN	-06	-1	0.7	像伪排放源	21.1349	87.9949	11.8997	6.95218	121.334	59.858	0.0308563	3403	758.6	764.3	692.586	0.14301
92	41.0808	-101.141	948	2023-08-05 17:48:20	2023-08-05 11:48:20	Electricity Generation (1.A.1.a.i)	CO2	RMF		ZY1E	2493.72	253.828	6.02			ZY1E_AHSI_W101.24_N41.04_20230805_020428_L1A0000637084	Gerald Gentleman Station_20230805	Gerald Gentleman Station	20230805	NE	-06	-1	0.7		43.7131	210.115	12.8536	9.28425	19.0869	38.3011	0.0268563	6077	1358.5	1357.1	1231.39	1.02512
93	35.2972	-101.748	1090	2022-03-05 17:52:24	2022-03-05 11:52:24	Electricity Generation (1.A.1.a.i)	CO2	RMF		ZY1E	184.381	26.6859	10.76			ZY1E_AHSI_W101.46_N35.28_20220305_012995_L1A0000414997	Harrington Station_20220305	Harrington Station	20220305	TX	-06	-1	0	排放强度太低了，无法检测到	15.7873	10.8986	4.25049	4.59089	126.422	453.435	0.0379875	6193	167.2	177.3	159.622	0.155106
94	35.2972	-101.748	1090	2022-03-31 17:54:08	2022-03-31 11:54:08	Electricity Generation (1.A.1.a.i)	CO2	RMF		ZY1E	671.099	73.3219	5.28			ZY1E_AHSI_W101.95_N35.28_20220331_013368_L1A0000427095	Harrington Station_20220331	Harrington Station	20220331	TX	-06	1	1		11.0579	62.2641	3.51887	6.74526	9.12498	16.06	0.0470625	6193	641.9	638.7	579.709	0.157648
95	39.1747	-111.029	1725	2020-10-04 18:32:36	2020-10-04 11:32:36	Electricity Generation (1.A.1.a.i)	CO2	RMF		ZY1E	783.192	189.702	2.13			ZY1E_AHSI_W111.21_N39.27_20201004_005578_L1A0000168618	Hunter_20201004	Hunter	20201004	UT	-07	1	1	完美	11.133	178.569	6.52555	6.54078	51.9697	36.8985	0.0165812	6165	656	681.6	607.499	0.289207
96	39.1747	-111.029	1725	2020-09-05 18:32:32	2020-09-05 11:32:32	Electricity Generation (1.A.1.a.i)	CO2	RMF		ZY1E	956.178	119.493	1.91			ZY1E_AHSI_W111.31_N39.27_20200905_005163_L1A0000144224	Hunter_20200905	Hunter	20200905	UT	-07	-1	0.7	有羽流	10.8355	108.658	6.57145	7.63792	22.4944	14.3214	0.00791875	6165	1057.9	1295.6	1074.72	0.110298
97	29.3091	-98.3205	149	2022-09-30 17:31:53	2022-09-30 11:31:53	Electricity Generation (1.A.1.a.i)	CO2	RMF		ZY1E	1184.41	148.483	1.61			ZY1E_AHSI_W98.07_N29.51_20220930_015991_L1A0000509878	J K Spruce_20220930	J K Spruce	20220930	TX	-06	-1	0.7	有噪声，有羽流	15.8886	132.594	8.62854	14.2649	41.4006	22.2183	0.0173875	7097	1501.1	1499.5	1361.03	0.129763
98	29.3091	-98.3205	149	2022-04-18 17:33:49	2022-04-18 11:33:49	Electricity Generation (1.A.1.a.i)	CO2	RMF		ZY1E	648.389	73.7614	6.44			ZY1E_AHSI_W98.20_N29.06_20220418_013626_L1A0000435959	J K Spruce_20220418	J K Spruce	20220418	TX	-06	-1	0.7		21.6358	52.1256	6.11914	6.86404	170.841	366.739	0.0274688	7097	629.1	628.9	570.61	0.136308
99	29.3091	-98.3205	149	2020-09-30 17:33:03	2020-09-30 11:33:03	Electricity Generation (1.A.1.a.i)	CO2	RMF		ZY1E	1016.11	166.559	3.18			ZY1E_AHSI_W98.50_N29.51_20200930_005521_L1A0000170469	J K Spruce_20200930	J K Spruce	20200930	TX	-06	-1	0.7		19.4697	147.089	7.28708	9.05522	116.942	123.958	0.0273688	7097	914.9	958.2	851.588	0.193198
100	29.3091	-98.3205	149	2020-10-29 17:33:12	2020-10-29 11:33:12	Electricity Generation (1.A.1.a.i)	CO2	RMF		ZY1E	461.32	58.5345	7.17			ZY1E_AHSI_W98.51_N29.06_20201029_005935_L1A0000194928	J K Spruce_20201029	J K Spruce	20201029	TX	-06	1	1	有团块排放	24.002	34.5325	6.82703	5.10618	0.403266	0.963806	0.0222437	7097	508.1	564.9	489.281	0.0571469
101	29.3091	-98.3205	149	2022-05-14 17:35:16	2022-05-14 11:35:16	Electricity Generation (1.A.1.a.i)	CO2	RMF		ZY1E	1195.36	289.867	2.12			ZY1E_AHSI_W98.53_N29.51_20220514_013997_L1A0000447750	J K Spruce_20220514	J K Spruce	20220514	TX	-06	-1	0.7		15.6811	274.186	7.68078	11.0935	24.8087	17.5315	0.0294188	7097	1041	1035.2	941.31	0.269889
102	41.7378	-108.787	2044	2020-09-11 18:24:53	2020-09-11 11:24:53	Electricity Generation (1.A.1.a.i)	CO2	RMF		ZY1E	1710.25	149.183	7.11			ZY1E_AHSI_W108.68_N41.92_20200911_005248_L1A0000148906	Jim Bridger_20200911	Jim Bridger	20200911	WY	-07	-1	0.7	排放位置在山上，不像排放源	20.4624	128.721	6.60441	6.79421	63.6503	150.851	0.063525	8066	1437.4	1314.4	1259.35	0.358041
103	41.7378	-108.787	2044	2020-08-13 18:24:46	2020-08-13 11:24:46	Electricity Generation (1.A.1.a.i)	CO2	RMF		ZY1E	1370.89	136.954	5.41			ZY1E_AHSI_W108.78_N41.92_20200813_004832_L1A0000126505	Jim Bridger_20200813	Jim Bridger	20200813	WY	-07	1	1	羽流形状很好，不过怎么风速有点问题	12.0808	124.873	4.1694	8.24685	33.7319	60.8299	0.0555812	8066	1902.1	1640.8	1630.74	0.159343
104	38.3472	-94.6467	263	2021-12-06 17:27:03	2021-12-06 11:27:03	Electricity Generation (1.A.1.a.i)	CO2	RMF		ZY1E	348.696	59.2032	4.78			ZY1E_AHSI_W94.33_N38.38_20211206_011716_L1A0000374910	La Cygne_20211206	La Cygne	20211206	KS	-06	-1	0.5		24.2346	34.9686	7.83144	5.52911	154.044	245.443	0.0279125	1241	365.5	442.9	363.173	0.0398624
105	38.3472	-94.6467	263	2021-09-13 17:27:32	2021-09-13 11:27:32	Electricity Generation (1.A.1.a.i)	CO2	RMF		ZY1E	629.251	94.8137	5.41			ZY1E_AHSI_W94.44_N38.38_20210913_010511_L1A0000334632	La Cygne_20210913	La Cygne	20210913	KS	-06	-1	0.5		37.4958	57.3179	12.5655	6.36248	58.2375	105.022	0.044475	1241	662.6	671	604.53	0.0408933
106	38.3472	-94.6467	263	2020-07-11 17:23:19	2020-07-11 11:23:19	Electricity Generation (1.A.1.a.i)	CO2	RMF		ZY1E	1991.16	370.743	2.72			ZY1E_AHSI_W94.49_N38.38_20200711_004357_L1A0000107667	La Cygne_20200711	La Cygne	20200711	KS	-06	1	1	反演效果不好，只有一团排放；感觉有点像是把水汽也核算进去了，偏高很多；误差太大了	30.9524	339.79	13.2889	13.2576	13.3357	12.091	0.0438062	1241	1601.4	1598	1451.58	0.371714
107	38.5583	-90.8361	146	2021-09-25 17:13:23	2021-09-25 11:13:23	Electricity Generation (1.A.1.a.i)	CO2	RMF		ZY1E	1477.32	261.302	2.94			ZY1E_AHSI_W90.79_N38.83_20210925_010683_L1A0000340283	Labadie_20210925	Labadie	20210925	MO	-06	1	1		29.4539	231.849	12.1852	6.86417	2.74145	2.68662	0.0544063	2103	1746.6	1732.6	1581.74	0.0660171
108	38.5583	-90.8361	146	2022-01-13 17:13:19	2022-01-13 11:13:19	Electricity Generation (1.A.1.a.i)	CO2	RMF		ZY1E	1083.04	140.469	1.73			ZY1E_AHSI_W90.90_N38.38_20220113_012261_L1A0000391512	Labadie_20220113	Labadie	20220113	MO	-06	-1	0.7		18.4675	122.001	10.7721	4.98901	124.233	71.641	0.041875	2103	1841.4	1849.6	1672.1	0.352289
109	38.5583	-90.8361	146	2023-03-29 17:07:56	2023-03-29 11:07:56	Electricity Generation (1.A.1.a.i)	CO2	RMF		ZY1E	1938.24	230.137	1.58			ZY1E_AHSI_W90.98_N38.38_20230329_018573_L1A0000585856	Labadie_20230329	Labadie	20230329	MO	-06	1	1	羽流沿着江面规整陈列	13.5009	216.636	7.01033	6.20069	4.015	2.11456	0.0442688	2103	2464.5	2453.2	2234.56	0.13261
110	42.1103	-104.883	1393	2023-09-17 18:02:08	2023-09-17 11:02:08	Electricity Generation (1.A.1.a.i)	CO2	RMF		ZY1E	1574.87	143.686	7.79			ZY1E_AHSI_W104.76_N41.92_20230917_021045_L1A0000655064	Laramie River_20230917	Laramie River	20230917	WY	-07	-1	0.7	羽流良好	31.8157	111.87	8.45558	4.16364	172.905	448.975	0.0451063	6204	1667.1	1881.6	1518.85	0.0368816
111	42.1103	-104.883	1393	2023-06-25 18:05:08	2023-06-25 11:05:08	Electricity Generation (1.A.1.a.i)	CO2	RMF		ZY1E	1178.4	239.776	2.52			ZY1E_AHSI_W104.93_N41.92_20230625_019840_L1A0000620580	Laramie River_20230625	Laramie River	20230625	WY	-07	1	1	有排放	20.6217	219.154	10.0876	10.3877	127.687	107.257	0.066525	6204	1043.4	1114.7	951.947	0.23788
112	42.1103	-104.883	1393	2020-08-25 18:10:51	2020-08-25 11:10:51	Electricity Generation (1.A.1.a.i)	CO2	RMF		ZY1E	627.075	104.186	3.13			ZY1E_AHSI_W105.13_N42.36_20200825_005004_L1A0000136593	Laramie River_20200825	Laramie River	20200825	WY	-07	-1	0.7		11.9461	92.2402	5.16341	7.95905	168.891	176.209	0.0381063	6204	520.3	520.5	472.038	0.32844
113	32.2597	-94.5703	98	2021-04-01 17:20:59	2021-04-01 11:20:59	Electricity Generation (1.A.1.a.i)	CO2	RMF		ZY1E	1006.5	174.962	3.06			ZY1E_AHSI_W94.40_N32.17_20210401_008144_L1A0000261751	Martin Lake_20210401	Martin Lake	20210401	TX	-06	-1	0.7	有羽流	23.4455	151.517	9.26453	6.07439	171.17	174.594	0.04435	6146	1201.3	1170.4	1080.46	0.0684478
114	32.2597	-94.5703	98	2022-03-03 17:22:15	2022-03-03 11:22:15	Electricity Generation (1.A.1.a.i)	CO2	RMF		ZY1E	1274.72	145.463	0.58			ZY1E_AHSI_W94.59_N32.17_20220303_012967_L1A0000414108	Martin Lake_20220303	Martin Lake	20220303	TX	-06	-1	1	这一景本应该能够看到完美羽流的，但是羽流的方向刚好经过了湖面，导致出现一段非常大的异常高值	12.4922	132.971	8.37224	7.03888	16.032	3.09952	0.0434438	6146	1866.9	1838.5	1684.18	0.24312
115	32.2597	-94.5703	98	2021-01-04 17:21:40	2021-01-04 11:21:40	Electricity Generation (1.A.1.a.i)	CO2	RMF		ZY1E	1165.36	149.532	1.96			ZY1E_AHSI_W94.77_N32.17_20210104_006896_L1A0000221658	Martin Lake_20210104	Martin Lake	20210104	TX	-06	-1	0.5	水汽干扰大，几乎无反演结果	16.7965	132.735	9.59377	4.78936	40.439	26.4201	0.0507375	6146	1286	1418.3	1208.65	0.0358173
116	31.185	-96.4853	129	2022-01-30 17:28:05	2022-01-30 11:28:05	Electricity Generation (1.A.1.a.i)	CO2	RMF		ZY1E	897.652	114.24	4.62			ZY1E_AHSI_W96.19_N31.29_20220130_012507_L1A0000399543	Oak Grove_20220130	Oak Grove	20220130	TX	-06	-1	0.7		21.7009	92.5394	6.98064	8.23632	82.6559	127.29	0.0190875	6180	1396	1398.9	1267.66	0.291881
117	31.185	-96.4853	129	2022-03-26 17:27:55	2022-03-26 11:27:55	Electricity Generation (1.A.1.a.i)	CO2	RMF		ZY1E	830.575	133.788	3.3			ZY1E_AHSI_W96.23_N31.29_20220326_013296_L1A0000424559	Oak Grove_20220326	Oak Grove	20220326	TX	-06	-1	0.7		17.9128	115.875	6.90581	8.21208	8.64284	9.50712	0.0251563	6180	767.3	835.6	723.965	0.147259
118	31.185	-96.4853	129	2020-10-06 17:25:38	2020-10-06 11:25:38	Electricity Generation (1.A.1.a.i)	CO2	RMF		ZY1E	1541.73	194.492	1.93			ZY1E_AHSI_W96.26_N31.29_20201006_005607_L1A0000169633	Oak Grove_20201006	Oak Grove	20201006	TX	-06	-1	0.7	有排放，无羽流	19.1304	175.362	10.8168	9.63164	2.80282	1.80315	0.0304312	6180	1874.4	1879.2	1702.24	0.0942929
119	31.185	-96.4853	129	2021-04-24 17:27:56	2021-04-24 11:27:56	Electricity Generation (1.A.1.a.i)	CO2	RMF		ZY1E	1338	140.912	5.95			ZY1E_AHSI_W96.28_N31.29_20210424_008474_L1A0000271419	Oak Grove_20210424	Oak Grove	20210424	TX	-06	-1	0.7	偏高	27.234	113.678	8.51841	9.80526	170.389	337.939	0.0375562	6180	893.6	900.9	813.64	0.644463
120	31.185	-96.4853	129	2021-12-06 17:29:06	2021-12-06 11:29:06	Electricity Generation (1.A.1.a.i)	CO2	RMF		ZY1E	1638.39	152.207	7.76			ZY1E_AHSI_W96.41_N31.29_20211206_011716_L1A0000374926	Oak Grove_20211206	Oak Grove	20211206	TX	-06	1	1	有一点点羽流	35.5472	116.66	9.85712	4.50301	152.929	395.576	0.0217938	6180	1798.7	1790.1	1627.98	0.00639315
121	31.185	-96.4853	129	2020-07-11 17:25:19	2020-07-11 11:25:19	Electricity Generation (1.A.1.a.i)	CO2	RMF		ZY1E	1971.87	303.459	3.26			ZY1E_AHSI_W96.58_N31.29_20200711_004359_L1A0000107694	Oak Grove_20200711	Oak Grove	20200711	TX	-06	1	1	羽流可以	25.021	278.438	9.1374	12.8693	1.63683	1.77868	0.0343313	6180	1869.6	1875.6	1698.34	0.161059
122	31.185	-96.4853	129	2020-06-12 17:25:12	2020-06-12 11:25:12	Electricity Generation (1.A.1.a.i)	CO2	RMF		ZY1E	1876.75	252.185	4			ZY1E_AHSI_W96.74_N31.10_20200612_003941_L1A0000093912	Oak Grove_20200612	Oak Grove	20200612	TX	-06	-1	0.7	排放羽流很清晰	33.4516	218.733	11.6421	10.8001	14.8252	19.7669	0.0377062	6180	1759.1	1762.5	1597.11	0.175091
123	29.9172	-96.7506	115	2022-01-30 17:28:28	2022-01-30 11:28:28	Electricity Generation (1.A.1.a.i)	CO2	RMF		ZY1E	876.157	158.818	2.83			ZY1E_AHSI_W96.55_N29.95_20220130_012507_L1A0000399546	Sam Seymour_20220130	Sam Seymour	20220130	TX	-06	-1	0.7		15.6178	143.2	6.40762	8.66151	13.4543	12.6919	0.0214875	6179	1394.8	1390.4	1263.48	0.306552
124	29.9172	-96.7506	115	2022-03-26 17:28:17	2022-03-26 11:28:17	Electricity Generation (1.A.1.a.i)	CO2	RMF		ZY1E	1826.82	233.484	3.98			ZY1E_AHSI_W96.59_N29.95_20220326_013296_L1A0000424562	Sam Seymour_20220326	Sam Seymour	20220326	TX	-06	1	1	能看到排放，但羽流飘到了湖面上	19.6218	213.862	6.82593	10.7273	29.6323	39.3122	0.083525	6179	1765.4	1773.9	1605.14	0.138104
125	29.9172	-96.7506	115	2021-04-24 17:28:19	2021-04-24 11:28:19	Electricity Generation (1.A.1.a.i)	CO2	RMF		ZY1E	1151.28	118.887	6.15			ZY1E_AHSI_W96.65_N29.95_20210424_008474_L1A0000271422	Sam Seymour_20210424	Sam Seymour	20210424	TX	-06	1	1		23.3328	95.5545	6.75929	4.14205	167.481	343.336	0.0373	6179	1037.5	1164.7	995.055	0.157007
126	29.9172	-96.7506	115	2020-07-11 17:25:42	2020-07-11 11:25:42	Electricity Generation (1.A.1.a.i)	CO2	RMF		ZY1E	1615.27	280.392	2.82			ZY1E_AHSI_W96.95_N29.95_20200711_004359_L1A0000107697	Sam Seymour_20200711	Sam Seymour	20200711	TX	-06	-1	0.7	有羽流，还不错，飘到水面上了，前16波段清晰；作为强吸收和弱吸收的案例	15.3813	265.011	6.25814	16.5075	36.5968	34.401	0.0312375	6179	1793.1	1824.9	1638.69	0.0142909
127	29.9172	-96.7506	115	2020-06-12 17:25:31	2020-06-12 11:25:31	Electricity Generation (1.A.1.a.i)	CO2	RMF		ZY1E	1414.28	201.806	3.64			ZY1E_AHSI_W97.05_N29.95_20200612_003941_L1A0000093915	Sam Seymour_20200612	Sam Seymour	20200612	TX	-06	1	1	羽流形状很好，可以作为案例	22.2143	179.592	7.48002	14.8057	15.7202	19.0738	0.02765	6179	1467.5	1562.8	1367.32	0.0343459
128	37.1517	-88.775	105	2021-11-28 17:03:59	2021-11-28 11:03:59	Electricity Generation (1.A.1.a.i)	CO2	RMF		ZY1E	302.381	60.6337	3.51			ZY1E_AHSI_W88.87_N37.06_20211128_011601_L1A0000371189	Shawnee_20211128	Shawnee	20211128	KY	-06	1	1	有排放	20.8964	39.7372	8.02407	3.21479	128.961	150.885	0.0540062	1379	406.4	406.4	368.68	0.179827
129	37.1517	-88.775	105	2021-01-19 17:02:53	2021-01-19 11:02:53	Electricity Generation (1.A.1.a.i)	CO2	RMF		ZY1E	639.524	85.8298	1.57			ZY1E_AHSI_W88.95_N37.06_20210119_007111_L1A0000229838	Shawnee_20210119	Shawnee	20210119	KY	-06	1	1	右下角伪排放源	14.3889	71.4409	8.69457	4.27976	151.407	79.2363	0.0245437	1379	868.501	669.401	781.87	0.182059
130	37.1517	-88.775	105	2020-12-21 17:03:04	2020-12-21 11:03:04	Electricity Generation (1.A.1.a.i)	CO2	RMF		ZY1E	461.112	61.0978	6.44			ZY1E_AHSI_W89.08_N37.06_20201221_006696_L1A0000212411	Shawnee_20201221	Shawnee	20201221	KY	-06	-1	0		24.0278	37.07	7.74834	5.9281	63.6019	136.532	0.0404813	1379	386.9	386.599	350.976	0.313799
131	45.3792	-93.8958	292	2022-03-20 17:31:14	2022-03-20 11:31:14	Electricity Generation (1.A.1.a.i)	CO2	RMF		ZY1E	1076.81	146.783	1.91			ZY1E_AHSI_W93.56_N45.45_20220320_013210_L1A0000421897	Sherburne County_20220320	Sherburne County	20220320	MN	-06	-1	0.7		24.417	122.366	13.5499	5.7328	4.62706	2.94589	0.0484687	6090	1451.2	1311.2	1250.89	0.139161
132	45.3792	-93.8958	292	2022-09-27 17:31:08	2022-09-27 11:31:08	Electricity Generation (1.A.1.a.i)	CO2	RMF		ZY1E	1049.2	181.651	3.34			ZY1E_AHSI_W94.02_N45.45_20220927_015948_L1A0000508557	Sherburne County_20220927	Sherburne County	20220927	MN	-06	-1	0.7	有羽流	36.9981	144.653	15.1422	4.84158	22.8149	25.4006	0.0586125	6090	1052.9	1052.9	955.175	0.0984389
133	38.5847	-85.4117	144	2022-03-27 16:51:14	2022-03-27 11:51:14	Electricity Generation (1.A.1.a.i)	CO2	RMF		ZY1E	290.923	56.8828	3.62			ZY1E_AHSI_W85.49_N38.38_20220327_013308_L1A0000425150	Trimble County_20220327	Trimble County	20220327	KY	-05	-1	0		19.7493	37.1335	6.89861	4.57908	111.436	134.466	0.0470625	6071	412.9	409.2	371.723	0.217367
134	34.4236	-92.1392	93	2022-07-26 17:12:13	2022-07-26 11:12:13	Electricity Generation (1.A.1.a.i)	CO2	RMF		ZY1E	957.05	168.93	3.26			ZY1E_AHSI_W91.94_N34.40_20220726_015044_L1A0000481359	White Bluff_20220726	White Bluff	20220726	AR	-06	-1	0.7	微弱的排放	33.7899	135.14	13.9936	6.52915	162.228	176.288	0.0465062	6009	1389.4	1742.2	1324.45	0.2774
135	34.4236	-92.1392	93	2022-01-13 17:14:27	2022-01-13 11:14:27	Electricity Generation (1.A.1.a.i)	CO2	RMF		ZY1E	498.995	125.085	2.28			ZY1E_AHSI_W92.11_N34.40_20220113_012261_L1A0000391521	White Bluff_20220113	White Bluff	20220113	AR	-06	-1	0.7	没有排放	20.5814	104.504	11.6792	8.62742	119.944	91.1574	0.0509625	6009	901.3	897.1	816.757	0.389052
136	34.4236	-92.1392	93	2022-03-09 17:14:19	2022-03-09 11:14:19	Electricity Generation (1.A.1.a.i)	CO2	RMF		ZY1E	1337.95	245.318	2.83			ZY1E_AHSI_W92.15_N34.40_20220309_013050_L1A0000416988	White Bluff_20220309	White Bluff	20220309	AR	-06	-1	0.5	很多云，不适合反演	26.642	218.676	10.729	10.1452	67.8404	63.9961	0.0207437	6009	280.3	279.1	254.03	4.26691
137	34.4236	-92.1392	93	2023-11-04 17:03:42	2023-11-04 11:03:42	Electricity Generation (1.A.1.a.i)	CO2	RMF		ZY1E	499.815	71.8373	0.86			ZY1E_AHSI_W92.33_N34.40_20231104_021729_L1A0000674441	White Bluff_20231104	White Bluff	20231104	AR	-06	1	1		18.4879	53.3493	12.4076	5.37124	104.693	30.012	0.0518812	6009	537.3	433.2	482.708	0.0354395
138	40.4627	-107.591	1939	2023-10-20 18:26:24	2023-10-20 11:26:24	Electricity Generation (1.A.1.a.i)	CO2	RMF		ZY1F	120.964	22.8712	0.42			ZY1F_AHSI_W107.55_N40.59_20231020_009525_L1A0000564874	Craig_20231020	Craig	20231020	CO	-07	-1	0.5	22有一个羽流 24双羽流0.001	10.4389	12.4324	8.71632	3.03636	17.6539	2.47155	0.0544688	6021	729.3	742.5	666.799	0.818591
139	36.3156	-86.4006	140	2023-03-05 16:54:32	2023-03-05 10:54:32	Electricity Generation (1.A.1.a.i)	CO2	RMF		ZY1F	329.239	76.5298	2.5			ZY1F_AHSI_W86.57_N36.17_20230305_006234_L1A0000379047	Gallatin_20230305	Gallatin	20230305	TN	-06	-1	0	无排放	14.7334	61.7964	6.22066	3.41463	132.656	110.547	0.0280437	3403	278.3	276	250.592	0.313846
140	41.0808	-101.141	948	2023-09-16 18:00:26	2023-09-16 12:00:26	Electricity Generation (1.A.1.a.i)	CO2	RMF		ZY1F	1475.34	192.871	3.96			ZY1F_AHSI_W101.04_N41.04_20230916_009032_L1A0000537816	Gerald Gentleman Station_20230916	Gerald Gentleman Station	20230916	NE	-06	1	1		19.381	173.49	6.82273	15.5633	26.5828	35.0893	0.034175	6077	1330.8	1109.2	1207.28	0.222033
141	41.0808	-101.141	948	2023-11-10 18:01:07	2023-11-10 12:01:07	Electricity Generation (1.A.1.a.i)	CO2	RMF		ZY1F	1016.97	112.927	4.88			ZY1F_AHSI_W101.05_N41.04_20231110_009821_L1A0000582861	Gerald Gentleman Station_20231110	Gerald Gentleman Station	20231110	NE	-06	-1	0.7		12.6135	100.313	3.9421	6.02035	83.0996	135.175	0.0268812	6077	1304.1	1307.4	1183.11	0.140427
142	41.0808	-101.141	948	2023-06-24 18:00:53	2023-06-24 12:00:53	Electricity Generation (1.A.1.a.i)	CO2	RMF		ZY1F	634.445	63.647	7.6			ZY1F_AHSI_W101.48_N41.04_20230624_007827_L1A0000469131	Gerald Gentleman Station_20230624	Gerald Gentleman Station	20230624	NE	-06	1	1	10波段效果好	17.8819	45.7651	5.75179	38.8239	34.456	87.2886	0.0373313	6077	688	687.2	624.143	0.0165061
143	39.3844	-80.3325	299	2022-06-21 16:24:44	2022-06-21 11:24:44	Electricity Generation (1.A.1.a.i)	CO2	RMF		ZY1F	1576.57	340.418	2.33			ZY1F_AHSI_W80.08_N39.27_20220621_002553_L1A0000190867	Harrison Power Station_20220621	Harrison Power Station	20220621	WV	-05	1	1	非常清晰	18.8267	321.591	8.6008	13.7901	25.0176	19.4303	0.046025	3944	1900.6	2008.4	1763.31	0.105907
144	39.3844	-80.3325	299	2023-04-18 16:34:27	2023-04-18 11:34:27	Electricity Generation (1.A.1.a.i)	CO2	RMF		ZY1F	700.163	79.5522	5.73			ZY1F_AHSI_W80.61_N39.27_20230418_006865_L1A0000414746	Harrison Power Station_20230418	Harrison Power Station	20230418	WV	-05	1	1		18.4282	61.124	5.30037	6.53356	169.114	323.007	0.0325312	3944	631.6	618	565.987	0.237067
145	39.1747	-111.029	1725	2023-08-17 18:36:51	2023-08-17 11:36:51	Electricity Generation (1.A.1.a.i)	CO2	RMF		ZY1F	870.733	214.743	2.06			ZY1F_AHSI_W110.71_N39.27_20230817_008602_L1A0000512937	Hunter_20230817	Hunter	20230817	UT	-07	1	1		7.48141	207.261	4.35271	15.5746	123.853	85.0454	0.0088375	6165	654	651.7	592.047	0.470716
146	39.1747	-111.029	1725	2023-06-23 18:36:03	2023-06-23 11:36:03	Electricity Generation (1.A.1.a.i)	CO2	RMF		ZY1F	589.342	64.0257	6.19			ZY1F_AHSI_W110.73_N39.27_20230623_007813_L1A0000468861	Hunter_20230623	Hunter	20230623	UT	-07	-1	0.7	有点不像	15.3328	48.6929	4.90173	3.84706	53.9514	111.32	0.0267812	6165	422.6	419.8	381.852	0.543377
147	39.1747	-111.029	1725	2023-07-19 18:38:10	2023-07-19 11:38:10	Electricity Generation (1.A.1.a.i)	CO2	RMF		ZY1F	535.23	60.9437	0.5			ZY1F_AHSI_W111.15_N39.27_20230719_008186_L1A0000490264	Hunter_20230719	Hunter	20230719	UT	-07	1	1	清晰完美	5.51476	55.4289	4.51397	18.8933	60.6186	10.1031	0.0084	6165	656.412	749.552	649.001	0.175301
148	29.3091	-98.3205	149	2022-10-13 17:33:02	2022-10-13 11:33:02	Electricity Generation (1.A.1.a.i)	CO2	RMF		ZY1F	1128.33	116.83	5.76			ZY1F_AHSI_W98.47_N29.51_20221013_004183_L1A0000250381	J K Spruce_20221013	J K Spruce	20221013	TX	-06	1	1	噪声较大	18.7003	98.1298	5.08199	7.99581	166.203	319.109	0.0246375	7097	1492.3	1495.9	1355.59	0.167644
149	38.3472	-94.6467	263	2022-09-20 17:24:31	2022-09-20 11:24:31	Electricity Generation (1.A.1.a.i)	CO2	RMF		ZY1F	774.733	96.9064	5.01			ZY1F_AHSI_W94.55_N38.38_20220920_003853_L1A0000229994	La Cygne_20220920	La Cygne	20220920	KS	-06	-1	0.7	水汽影响太大了	22.0552	74.8512	6.67484	4.93149	129.19	215.748	0.0315812	1241	759.1	765.6	691.003	0.121173
150	38.3472	-94.6467	263	2023-08-16 17:31:23	2023-08-16 11:31:23	Electricity Generation (1.A.1.a.i)	CO2	RMF		ZY1F	1040.3	190.436	2.8			ZY1F_AHSI_W94.56_N38.38_20230816_008587_L1A0000512042	La Cygne_20230816	La Cygne	20230816	KS	-06	1	1	飘到湖面上了	18.4404	171.996	7.70278	14.7593	136.528	127.426	0.048675	1241	1273.7	1441.1	1233.94	0.156927
151	38.3472	-94.6467	263	2023-01-08 17:27:27	2023-01-08 11:27:27	Electricity Generation (1.A.1.a.i)	CO2	RMF		ZY1F	1074.88	127.57	1.2			ZY1F_AHSI_W94.58_N38.38_20230108_005431_L1A0000329362	La Cygne_20230108	La Cygne	20230108	KS	-06	1	1	噪声较大	10.0832	117.487	6.45968	5.23319	27.3646	10.9459	0.0195563	1241	1406.5	1398.2	1272.57	0.155342
152	38.5583	-90.8361	146	2023-07-04 17:16:01	2023-07-04 11:16:01	Electricity Generation (1.A.1.a.i)	CO2	RMF		ZY1F	2827.86	579.329	2.41			ZY1F_AHSI_W90.79_N38.83_20230704_007970_L1A0000476992	Labadie_20230704	Labadie	20230704	MO	-06	1	1	构成羽流，有排放	25.2962	554.033	10.9846	17.0258	113.61	91.267	0.0224312	2103	2560.7	2558.1	2322.4	0.217644
153	38.5583	-90.8361	146	2023-10-22 17:17:43	2023-10-22 11:17:43	Electricity Generation (1.A.1.a.i)	CO2	RMF		ZY1F	1770.52	221.658	1.92			ZY1F_AHSI_W90.93_N38.38_20231022_009549_L1A0000565683	Labadie_20231022	Labadie	20231022	MO	-06	-1	0.7	受江水影响较大	20.3662	201.292	10.3641	6.37567	100.011	64.007	0.052475	2103	2197.7	2194	1992.77	0.111526
154	42.1103	-104.883	1393	2023-09-30 18:16:43	2023-09-30 11:16:43	Electricity Generation (1.A.1.a.i)	CO2	RMF		ZY1F	834.797	127.579	3.4			ZY1F_AHSI_W104.83_N41.92_20230930_009233_L1A0000549577	Laramie River_20230930	Laramie River	20230930	WY	-07	-1	0.7	有羽流	14.4659	113.113	5.60189	6.63395	15.3476	17.3939	0.0519437	6204	798.9	661.1	691.414	0.207376
155	32.2597	-94.5703	98	2023-12-10 17:27:08	2023-12-10 11:27:08	Electricity Generation (1.A.1.a.i)	CO2	RMF		ZY1F	1098.6	134.321	4.79			ZY1F_AHSI_W94.55_N32.17_20231210_010251_L1A0000608285	Martin Lake_20231210	Martin Lake	20231210	TX	-06	1	1	有羽流	24.3333	109.987	7.51168	8.10665	110.241	176.019	0.0413562	6146	1027.6	1026.4	931.733	0.179094
156	32.2597	-94.5703	98	2022-08-02 17:17:29	2022-08-02 11:17:29	Electricity Generation (1.A.1.a.i)	CO2	RMF		ZY1F	2385.03	352.866	3.39			ZY1F_AHSI_W94.57_N32.17_20220802_003150_L1A0000184740	Martin Lake_20220802	Martin Lake	20220802	TX	-06	-1	0.7	有排放，圆形，堆叠状，飘到湖面上	28.7752	324.091	10.633	9.10915	128.636	145.359	0.0468688	6146	2263.6	2623.6	2146.04	0.111363
157	32.2597	-94.5703	98	2022-11-20 17:20:45	2022-11-20 11:20:45	Electricity Generation (1.A.1.a.i)	CO2	RMF		ZY1F	2926.62	479.706	2.97			ZY1F_AHSI_W94.61_N32.17_20221120_004728_L1A0000290523	Martin Lake_20221120	Martin Lake	20221120	TX	-06	1	1	有一点羽流比较稀疏	25.2735	454.432	10.6008	7.91849	161.859	160.241	0.0447875	6146	2635.2	2664.4	2399.44	0.21971
158	31.185	-96.4853	129	2022-07-27 17:24:51	2022-07-27 11:24:51	Electricity Generation (1.A.1.a.i)	CO2	RMF		ZY1F	1679.18	223.323	3.79			ZY1F_AHSI_W96.64_N31.29_20220727_003064_L1A0000178119	Oak Grove_20220727	Oak Grove	20220727	TX	-06	-1	0.7		17.8939	205.429	5.88456	10.9634	8.60896	10.876	0.0293937	6180	1241	1493.7	1217.51	0.379186
159	31.185	-96.4853	129	2023-03-04 17:30:35	2023-03-04 11:30:35	Electricity Generation (1.A.1.a.i)	CO2	RMF		ZY1F	617.352	91.2692	3.8			ZY1F_AHSI_W96.65_N31.29_20230304_006220_L1A0000378222	Oak Grove_20230304	Oak Grove	20230304	TX	-06	-1	0.7	被云挡住了	15.9243	75.3449	5.50325	8.11752	27.2719	34.5444	0.0306125	6180	650.4	654.3	591.802	0.0431729
160	31.185	-96.4853	129	2023-08-16 17:33:23	2023-08-16 11:33:23	Electricity Generation (1.A.1.a.i)	CO2	RMF		ZY1F	2517.5	467.004	2.6			ZY1F_AHSI_W96.65_N31.29_20230816_008587_L1A0000512058	Oak Grove_20230816	Oak Grove	20230816	TX	-06	1	1	羽流很好，简直完美！！！适合作为案例	15.2119	451.793	5.89359	22.0618	1.68558	1.46084	0.026525	6180	1820.5	1806.6	1644.59	0.53077
161	31.185	-96.4853	129	2023-01-08 17:29:27	2023-01-08 11:29:27	Electricity Generation (1.A.1.a.i)	CO2	RMF		ZY1F	1274.53	153.074	4.4			ZY1F_AHSI_W96.67_N31.29_20230108_005431_L1A0000329378	Oak Grove_20230108	Oak Grove	20230108	TX	-06	1	1	有羽流，水池下方有一个点源	16.2558	136.818	5.11732	8.87919	6.04954	8.87266	0.0279063	6180	1957.3	1974.5	1783.17	0.285244
162	29.9172	-96.7506	115	2023-03-04 17:30:57	2023-03-04 11:30:57	Electricity Generation (1.A.1.a.i)	CO2	RMF		ZY1F	1288.34	213.592	3.01			ZY1F_AHSI_W97.01_N29.95_20230304_006220_L1A0000378225	Sam Seymour_20230304	Sam Seymour	20230304	TX	-06	1	1		16.3159	197.276	6.18047	8.39572	19.5928	19.6581	0.0215375	6179	672.8	881.2	704.883	0.827738
163	29.9172	-96.7506	115	2023-08-16 17:33:45	2023-08-16 11:33:45	Electricity Generation (1.A.1.a.i)	CO2	RMF		ZY1F	1482	308.011	2.37			ZY1F_AHSI_W97.01_N29.95_20230816_008587_L1A0000512061	Sam Seymour_20230816	Sam Seymour	20230816	TX	-06	1	1		11.8241	296.187	4.92906	10.5916	5.87723	4.64301	0.0271125	6179	1354.8	1363.7	1233.49	0.201465
164	37.1517	-88.775	105	2023-10-31 17:07:20	2023-10-31 11:07:20	Electricity Generation (1.A.1.a.i)	CO2	RMF		ZY1F	532.545	92.35	3.6			ZY1F_AHSI_W88.63_N37.05_20231031_009677_L1A0000574307	Shawnee_20231031	Shawnee	20231031	KY	-06	-1	0.5	羽流飘到了水面上，水汽干扰大	24.0218	68.3283	8.23313	3.78432	97.4388	116.927	0.0618688	1379	879.1	888.799	798.533	0.333095
165	45.3792	-93.8958	292	2022-07-21 17:27:56	2022-07-21 11:27:56	Electricity Generation (1.A.1.a.i)	CO2	RMF		ZY1F	2341.37	231.979	5.9			ZY1F_AHSI_W93.93_N45.45_20220721_002978_L1A0000173921	Sherburne County_20220721	Sherburne County	20220721	MN	-06	1	1	适合作为反演案例	31.8494	200.13	8.97732	11.7518	4.39687	8.64718	0.0379	6090	2400.9	2419.9	2185.82	0.0711671
