# Supplementary material for: Towards global carbon transparency: Spaceborne imaging spectroscopy enables precise CO2 emission quantification at facility scale
Source: Research Square preprint supplement (doi:10.21203/rs.3.rs-5913782/v1), 2025-01-29
Supplement: Supplementary file 33 [file Xinjiang-multisource.xlsx]

## Sheet: 2025.1.16
id	latitude	longitude	altitude	datetime	local_datetime	ipcc_sector	gas	algorithm	plume_bounds	platform	emission	emission_uncertainty	wind_speed	wind_speed_std	wind_direction	plume_length	vertical_mass_atmosphere	filename	foldername	facility	date	state	timezone	correction	extraction	plume_quality	remarks	uncertainty_ime_part	uncertainty_wind_part	inversion_std	ratio_plume_bkg	wind_direction_offset	wind_deviation	wind_fit	ratio_rgb_outlier	id_epa_facility	q_former	q_latter	emission_epa	quantification_error
1	44.8408	89.1946	603	2022-07-22 05:04:44	2022-07-22 13:04:44	Electricity Generation (1.A.1.a.i)	CO2	RMF	[89.120092, 44.840424, 89.194947, 44.902804]	GF5B	2028.58	274.419	3.62	0.730821	118	3355.97	969382	GF5B_AHSI_E89.4_N44.6_20220722_004634_L10000175325	Xinjiang_20220722_L10000175325	Chinacoal Energy	20220722	Xinjiang	+08	0	-1	0.7		11.509	262.91	4.2908	13.9816	8.86201	10.6935		0.0402959
2	44.6843	89.1167	502	2022-07-22 05:04:44	2022-07-22 13:04:44	Electricity Generation (1.A.1.a.i)	CO2	RMF	[89.081477, 44.680318, 89.117419, 44.699032]	GF5B	682.943	110.715	3.13	0.993244	97	1550.56	163592	GF5B_AHSI_E89.4_N44.6_20220722_004634_L10000175325	Xinjiang_20220722_L10000175325	East Hope Metals Wucaiwan-1	20220722	Xinjiang	+08	0	-1	0.7		8.58066	102.134	3.77654	10.1458	37.8958	39.5379		0.0417551
3	44.6972	89.1169	501	2022-07-22 05:04:44	2022-07-22 13:04:44	Electricity Generation (1.A.1.a.i)	CO2	RMF	[89.085932, 44.694576, 89.116528, 44.711211]	GF5B	538.386	89.6017	3.13	0.993244	97	1353.2	112549	GF5B_AHSI_E89.4_N44.6_20220722_004634_L10000175325	Xinjiang_20220722_L10000175325	East Hope Metals Wucaiwan-2	20220722	Xinjiang	+08	0	-1	0.7		9.08596	80.5157	3.91913	6.41974	38.459	40.1256		0.0444347
4	44.8544	89.1972	619	2022-07-22 05:04:44	2022-07-22 13:04:44	Electricity Generation (1.A.1.a.i)	CO2	RMF	[89.159599, 44.846662, 89.197918, 44.880525]	GF5B	1507.49	214.656	3.47	0.541233	136	2032.95	446554	GF5B_AHSI_E89.4_N44.6_20220722_004634_L10000175325	Xinjiang_20220722_L10000175325	Huadian North No.1	20220722	Xinjiang	+08	0	-1	0.7		11.2169	203.439	4.27425	11.3439	26.1188	30.2107		0.0394865
5	44.7979	89.1472	540	2022-07-22 05:04:44	2022-07-22 13:04:44	Electricity Generation (1.A.1.a.i)	CO2	RMF	[89.126627, 44.795274, 89.147420, 44.806265]	GF5B	558.325	86.8222	3.62	0.730821	118	950.341	75552.9	GF5B_AHSI_E89.4_N44.6_20220722_004634_L10000175325	Xinjiang_20220722_L10000175325	Huadian Wucaiwan	20220722	Xinjiang	+08	0	-1	0.7		14.4616	72.3606	5.33938	5.41666	20.1984	24.3727		0.0560939
6	44.8065	89.1946	584	2022-07-22 05:04:44	2022-07-22 13:04:44	Chemicals (1.A.2.c)	CO2	RMF	[89.165243, 44.805967, 89.194353, 44.820820]	GF5B	733.931	108.875	3.62	0.730821	118	1033.33	107989	GF5B_AHSI_E89.4_N44.6_20220722_004634_L10000175325	Xinjiang_20220722_L10000175325	Shaanxi Energy Investment Group	20220722	Xinjiang	+08	0	1	1		13.7554	95.1198	5.11077	11.2446	3.63059	4.38092		0.0641653
7	44.7889	89.1907	566	2022-07-22 05:04:44	2022-07-22 13:04:44	Chemicals (1.A.2.c)	CO2	RMF	[89.179798, 44.788739, 89.191086, 44.797650]	GF5B	499.389	78.67	3.62	0.730821	118	605.425	43051.2	GF5B_AHSI_E89.4_N44.6_20220722_004634_L10000175325	Xinjiang_20220722_L10000175325	Xinjiang Henglian	20220722	Xinjiang	+08	0	1	0.7		13.9476	64.7225	5.19608	5.56536	152.426	183.928		0.0648694
8	44.8972	89.2461	674	2022-07-22 05:04:44	2022-07-22 13:04:44	Chemicals (1.A.2.c)	CO2	RMF	[89.230890, 44.897457, 89.246039, 44.909933]	GF5B	270.967	55.695	3.06	0.534072	142	527.267	22367.1	GF5B_AHSI_E89.4_N44.6_20220722_004634_L10000175325	Xinjiang_20220722_L10000175325	Xinjiang Yihua	20220722	Xinjiang	+08	0	-1	0.7		14.2145	41.4805	5.7428	4.59088	116.69	119.024		0.0406803
9	44.6982	89.0733	501	2022-07-22 05:04:44	2022-07-22 13:04:44	Electricity Generation (1.A.1.a.i)	CO2	RMF	[89.072566, 44.703191, 89.088309, 44.720419]	GF5B	356.923	60.6191	3.2	1.03079	110	1058.94	57644.9	GF5B_AHSI_E89.4_N44.6_20220722_004634_L10000175325	Xinjiang_20220722_L10000175325	Guotai Xinhua Coal Chemical power station	20220722	Xinjiang	+08	0	-1	0.7		8.43093	52.1882	3.77783	4.45823	158.077	168.616		0.0354469
