# Supplementary material for: Towards global carbon transparency: Spaceborne imaging spectroscopy enables precise CO2 emission quantification at facility scale
Source: Research Square preprint supplement (doi:10.21203/rs.3.rs-5913782/v1), 2025-01-29
Supplement: Supplementary file 34 [file 点源坐标.xlsx]

## Sheet: Sheet1
id	name	ipcc_sector	longitude	latitude	altitude	名称	country	State	Province	Annual emissions	timezone	Facility ID(EPA)	卫星平台检索表达式	GoogleEarth平台	百度平台
1	Gezhouba Jingmen	Cement production (2.A.1)	112.188	31.1455		葛洲坝荆门水泥厂	CHN		Hubei		+08		POINT(112.1881 31.1455)	31.1455, 112.1881	112.1881, 31.1455
2	Yadong Ruichang No.2	Cement production (2.A.1)	115.579	29.8098		江西亚东水泥公司 瑞昌制造二厂	CHN		Jiangxi		+08		POINT(115.5789 29.8098)	29.8098, 115.5789	115.5789, 29.8098
3	Yadong Ruichang No.1	Cement production (2.A.1)	115.564	29.8289		江西亚东水泥公司 瑞昌制造一厂	CHN		Jiangxi		+08		POINT(115.5639 29.8289)	29.8289, 115.5639	115.5639, 29.8289
4	Huaxin Huangshi	Cement production (2.A.1)	115.372	29.9417		黄石华新水泥厂	CHN		Hubei		+08		POINT(115.3724 29.9417)	29.9417, 115.3724	115.3724, 29.9417
5	Yadong Huanggang	Cement production (2.A.1)	115.423	29.9173		黄冈亚东水泥厂	CHN		Hubei		+08		POINT(115.4231 29.9173)	29.9173, 115.4231	115.4231, 29.9173
6	Huaxin Wuxue	Cement production (2.A.1)	115.445	29.8944		武穴华新水泥厂	CHN		Hubei		+08		POINT(115.4452 29.8944)	29.8944, 115.4452	115.4452, 29.8944
7	Shuanghe	Cement production (2.A.1)	112.271	31.2748		双河水泥厂	CHN		Hubei		+08		POINT(112.2714 31.2748)	31.2748, 112.2714	112.2714, 31.2748
8	Yunyue	Chemicals (1.A.2.c)	115.442	29.9158		湖北云越能源	CHN		Hubei		+08		POINT(115.4418 29.9158)	29.9158, 115.4418	115.4418, 29.9158
9	Shaanxi Energy Investment Group	Chemicals (1.A.2.c)	89.1946	44.8065		陕西能源投资集团	CHN		Xinjiang		+08		POINT(89.1946 44.8065)	44.8065, 89.1946	89.1946, 44.8065
10	Xinjiang Henglian	Chemicals (1.A.2.c)	89.1907	44.7889		新疆恒联能源	CHN		Xinjiang		+08		POINT(89.1907 44.7889)	44.7889, 89.1907	89.1907, 44.7889
11	Xinjiang Yihua	Chemicals (1.A.2.c)	89.2461	44.8972		新疆宜化化工有限公司	CHN		Xinjiang		+08		POINT(89.2461 44.8972)	44.8972, 89.2461	89.2461, 44.8972
12	Xisaishan	Electricity Generation (1.A.1.a.i)	115.179	30.2029		湖北西塞山发电厂	CHN		Hubei		+08		POINT(115.1793 30.2029)	30.2029, 115.1793	115.1793, 30.2029
13	Huaneng Jingmen	Electricity Generation (1.A.1.a.i)	112.248	31.0576		华能荆门热电厂	CHN		Hubei		+08		POINT(112.2485 31.0576)	31.0576, 112.2485	112.2485, 31.0576
14	Togtoh Datang power station	Electricity Generation (1.A.1.a.i)	111.359	40.1941	1067	大唐托克托电厂	CHN		Inner Mongolia		+08		POINT(111.3593 40.1941)	40.1941, 111.3593	111.3593, 40.1941
15	Fugu Qingshuichuan	Electricity Generation (1.A.1.a.i)	111.119	39.2049		府谷清水川电厂	CHN		Shaanxi	10.223	+08		POINT(111.119 39.2049)	39.2049, 111.119	111.119, 39.2049
16	Chinalco Ningxia Maliantai	Electricity Generation (1.A.1.a.i)	106.57	38.1734		中铝宁夏马莲台电厂	CHN		Ningxia		+08		POINT(106.5696 38.1734)	38.1734, 106.5696	106.5696, 38.1734
17	Guodian Changyuan Hanchuan No. 1	Electricity Generation (1.A.1.a.i)	113.915	30.6553		国电长源汉川第一发电厂	CHN		Hubei		+08		POINT(113.9145 30.6553)	30.6553, 113.9145	113.9145, 30.6553
18	Ganneng Fengcheng	Electricity Generation (1.A.1.a.i)	115.709	28.1944		赣能股份丰城发电厂	CHN		Jiangxi	11.999	+08		POINT(115.7088 28.1944)	28.1944, 115.7088	115.7088, 28.1944
19	Shenhua Guoneng Hami	Electricity Generation (1.A.1.a.i)	93.0131	42.407		神华国能哈密煤电公司哈密电厂	CHN		Xinjiang	11.82	+08		POINT(93.0131 42.407)	42.407, 93.0131	93.0131, 42.407
20	Weiqiao Zouping-7	Electricity Generation (1.A.1.a.i)	117.861	36.8963		魏桥集团邹平七电	CHN		Shandong	11.82	+08		POINT(117.8605 36.8963)	36.8963, 117.8605	117.8605, 36.8963
21	Huadian Xiangyang	Electricity Generation (1.A.1.a.i)	112.167	31.9118		华电襄阳发电厂	CHN		Hubei	11.641	+08		POINT(112.1669 31.9118)	31.9118, 112.1669	112.1669, 31.9118
22	Guohua Taicang	Electricity Generation (1.A.1.a.i)	121.256	31.5877		神华国华太仓发电厂	CHN		Jiangsu	11.462	+08		POINT(121.2563 31.5877)	31.5877, 121.2563	121.2563, 31.5877
23	Boryeong	Electricity Generation (1.A.1.a.i)	126.491	36.4009		保宁发电站	KOR		South Chungcheong	17.555			POINT(126.4908 36.4009)	36.4009, 126.4908	126.4908, 36.4009
24	Belchatow Power Station	Electricity Generation (1.A.1.a.i)	19.3294	51.2674		贝乌哈图夫发电站	POL		Lodzkie		+01		POINT(19.3294 51.2674)	51.2674, 19.3294	19.3294, 51.2674
25	Antelope Valley	Electricity Generation (1.A.1.a.i)	-101.834	47.3714	590		USA	ND			-06	6469	POINT(-101.8344 47.3714)	47.3714, -101.8344	-101.8344, 47.3714
26	Craig	Electricity Generation (1.A.1.a.i)	-107.591	40.4627	1939		USA	CO			-07	6021	POINT(-107.5912 40.4627)	40.4627, -107.5912	-107.5912, 40.4627
27	Four Corners Steam Elec Station	Electricity Generation (1.A.1.a.i)	-108.481	36.69	1630		USA	NM			-07	2442	POINT(-108.4814 36.69)	36.69, -108.4814	-108.4814, 36.69
28	Gallatin	Electricity Generation (1.A.1.a.i)	-86.4006	36.3156	140		USA	TN			-06	3403	POINT(-86.4006 36.3156)	36.3156, -86.4006	-86.4006, 36.3156
29	Gerald Gentleman Station	Electricity Generation (1.A.1.a.i)	-101.141	41.0808	948		USA	NE			-06	6077	POINT(-101.1408 41.0808)	41.0808, -101.1408	-101.1408, 41.0808
30	Harrington Station	Electricity Generation (1.A.1.a.i)	-101.748	35.2972	1090		USA	TX			-06	6193	POINT(-101.7475 35.2972)	35.2972, -101.7475	-101.7475, 35.2972
31	Harrison Power Station	Electricity Generation (1.A.1.a.i)	-80.3325	39.3844	299		USA	WV			-05	3944	POINT(-80.3325 39.3844)	39.3844, -80.3325	-80.3325, 39.3844
32	Hunter	Electricity Generation (1.A.1.a.i)	-111.029	39.1747	1725		USA	UT			-07	`	POINT(-111.0289 39.1747)	39.1747, -111.0289	-111.0289, 39.1747
33	J K Spruce	Electricity Generation (1.A.1.a.i)	-98.3205	29.3091	149		USA	TX			-06	7097	POINT(-98.3205 29.3091)	29.3091, -98.3205	-98.3205, 29.3091
34	Jim Bridger	Electricity Generation (1.A.1.a.i)	-108.787	41.7378	2044		USA	WY			-07	8066	POINT(-108.7875 41.7378)	41.7378, -108.7875	-108.7875, 41.7378
35	La Cygne	Electricity Generation (1.A.1.a.i)	-94.6467	38.3472	263		USA	KS			-06	1241	POINT(-94.6467 38.3472)	38.3472, -94.6467	-94.6467, 38.3472
36	Labadie	Electricity Generation (1.A.1.a.i)	-90.8361	38.5583	146		USA	MO			-06	2103	POINT(-90.8361 38.5583)	38.5583, -90.8361	-90.8361, 38.5583
37	Laramie River	Electricity Generation (1.A.1.a.i)	-104.883	42.1103	1393		USA	WY			-07	6204	POINT(-104.8828 42.1103)	42.1103, -104.8828	-104.8828, 42.1103
38	Martin Lake	Electricity Generation (1.A.1.a.i)	-94.5703	32.2597	98		USA	TX			-06	6146	POINT(-94.5703 32.2597)	32.2597, -94.5703	-94.5703, 32.2597
39	Oak Grove	Electricity Generation (1.A.1.a.i)	-96.4853	31.185	129		USA	TX			-06	6180	POINT(-96.4853 31.185)	31.185, -96.4853	-96.4853, 31.185
40	Sam Seymour	Electricity Generation (1.A.1.a.i)	-96.7506	29.9172	115		USA	TX			-06	6179	POINT(-96.7506 29.9172)	29.9172, -96.7506	-96.7506, 29.9172
41	Shawnee	Electricity Generation (1.A.1.a.i)	-88.775	37.1517	105		USA	KY			-06	1379	POINT(-88.775 37.1517)	37.1517, -88.775	-88.775, 37.1517
42	Sherburne County	Electricity Generation (1.A.1.a.i)	-93.8958	45.3792	292		USA	MN			-06	6090	POINT(-93.8958 45.3792)	45.3792, -93.8958	-93.8958, 45.3792
43	Trimble County	Electricity Generation (1.A.1.a.i)	-85.4117	38.5847	144		USA	KY			-05	6071	POINT(-85.4117 38.5847)	38.5847, -85.4117	-85.4117, 38.5847
44	White Bluff	Electricity Generation (1.A.1.a.i)	-92.1392	34.4236	93		USA	AR			-06	6009	POINT(-92.1392 34.4236)	34.4236, -92.1392	-92.1392, 34.4236
45	Huadian Jiangling	Electricity Generation (1.A.1.a.i)	112.31	30.09		湖北华电江陵发电厂	CHN		Hubei		+08		POINT(112.3104 30.09)	30.09, 112.3104	112.3104, 30.09
46	Chinacoal Energy	Electricity Generation (1.A.1.a.i)	89.1946	44.8408		中煤能源新疆煤电化有限公司	CHN		Xinjiang		+08		POINT(89.1946 44.8408)	44.8408, 89.1946	89.1946, 44.8408
47	Huadian North No.1	Electricity Generation (1.A.1.a.i)	89.1972	44.8544		华电北一公司	CHN		Xinjiang		+08		POINT(89.1972 44.8544)	44.8544, 89.1972	89.1972, 44.8544
48	Huadian Wucaiwan	Electricity Generation (1.A.1.a.i)	89.1472	44.7979		华电新疆准东五彩湾发电厂	CHN		Xinjiang		+08		POINT(89.1472 44.7979)	44.7979, 89.1472	89.1472, 44.7979
49	East Hope Metals Wucaiwan-1	Electricity Generation (1.A.1.a.i)	89.1167	44.6843		东方希望有色金属公司五彩湾电厂1	CHN		Xinjiang	17.641	+08		POINT(89.1167 44.6843)	44.6843, 89.1167	89.1167, 44.6843
50	East Hope Metals Wucaiwan-2	Electricity Generation (1.A.1.a.i)	89.1169	44.6972		东方希望有色金属公司五彩湾电厂2	CHN		Xinjiang	17.641	+08		POINT(89.1169 44.6972)	44.6972, 89.1169	89.1169, 44.6972
51	Hubei Zhongwei	Lime production (2.A.2)	112.137	31.1906		湖北众为钙业	CHN		Hubei		+08		POINT(112.1371 31.1906)	31.1906, 112.1371	112.1371, 31.1906
52	Jingmen Petrochemical Plant	Petrochemical and Carbon Black Production (2.B.8)	112.231	31.037		荆门石化总厂	CHN		Hubei		+08		POINT(112.2306 31.037)	31.037, 112.2306	112.2306, 31.037
53	WISCO-1	Iron and Steel Production (2.C.1)	114.437	30.6304		武钢集团1	CHN		Hubei		+08		POINT(114.4374 30.6304)	30.6304, 114.4374	114.4374, 30.6304
54	WISCO-2	Iron and Steel Production (2.C.1)	114.437	30.6364		武钢集团2	CHN		Hubei		+08		POINT(114.4374 30.6364)	30.6364, 114.4374	114.4374, 30.6364
55	WISCO-3	Iron and Steel Production (2.C.1)	114.442	30.6264		武钢集团3	CHN		Hubei		+08		POINT(114.4421 30.6264)	30.6264, 114.4421	114.4421, 30.6264
56	WISCO-4	Iron and Steel Production (2.C.1)	114.435	30.6276		武钢集团4	CHN		Hubei		+08		POINT(114.4347 30.6276)	30.6276, 114.4347	114.4347, 30.6276
57	WISCO-5	Iron and Steel Production (2.C.1)	114.449	30.636		武钢集团5	CHN		Hubei		+08		POINT(114.4486 30.636)	30.636, 114.4486	114.4486, 30.636
51			118.532	37.4009	3.06		CHN		Shandong		+08		POINT(118.5322 37.4009)	37.4009, 118.5322	118.5322, 37.4009
52			118.237	37.5363			CHN		Shandong				#REF!	#REF!	#REF!
53			118.329	37.2752	4.26		CHN		Shandong				#REF!	#REF!	#REF!
