# Supplementary material for: Towards global carbon transparency: Spaceborne imaging spectroscopy enables precise CO2 emission quantification at facility scale
Source: Research Square preprint supplement (doi:10.21203/rs.3.rs-5913782/v1), 2025-01-29
Supplement: Supplementary file 35 [file 美国电厂GF5.xlsx]

## Sheet: 2025.1
id	filename	foldername	facility	type	Latitude	Longitude	Altitude	satellite	date	Time of Satellite	UTC	State	Zone	Local Standard Time	Facility ID	day LST	time	前整点Q	后整点Q	avg Q(ton/h)	反演结果	反演误差	不确定度	IME_u (t/h)	Wind_u (t/h)	MF_u (ppm)	q	diff_dir	phi	风速	提取	排放	背景	备注
1	GF5A_AHSI_W101.6_N47.5_20240823_009093_L10000162368	Antelope Valley_20240823	Antelope Valley	electricity	47.3714	-101.834	590	GF5A	20240823	2024-08-23 19:29:30	2024-08-23 19:29:30	ND	CST	2024-08-23 13:29:30	6469	08/23/2024	13:29	988.6	878.5	848.567	593.326	0.300791	93.2291	46.0402	47.1889	14.3295	5.08699	137.522	288.339	6.29	1	0.5	0.0573063
2	GF5A_AHSI_W102.1_N47.6_20240830_009196_L10000164953	Antelope Valley_20240830	Antelope Valley	electricity	47.3714	-101.834	590	GF5A	20240830	2024-08-30 19:31:07	2024-08-30 19:31:07	ND	CST	2024-08-30 13:31:07	6469	08/30/2024	13:31	538	546.6	492.096	693.602	0.409485	107.446	35.3	72.1457	12.0011	3.67416	173.639	254.67	4.4	-1	0.5	0.0449375
3	GF5B_AHSI_W102.0_N47.5_20230130_007439_L10000282305	Antelope Valley_20230130	Antelope Valley	electricity	47.3714	-101.834	590	GF5B	20230130	2023-01-31 01:57:28	2023-01-30 17:57:28	ND	CST	2023-01-30 11:57:28	6469	01/30/2023	11:57	1034.6	1033.4	937.539	1176.19	0.254546	188.013	67.4684	120.544	25.6654	3.54035	163.538	244.216	4.48	-1	0.5	0.0676563
4	GF5B_AHSI_W102.1_N47.5_20240623_014869_L10000537123	Antelope Valley_20240623	Antelope Valley	electricity	47.3714	-101.834	590	GF5B	20240623	2024-06-24 01:57:48	2024-06-23 17:57:48	ND	CST	2024-06-23 11:57:48	6469	06/23/2024	11:57	1055.5	1045.9	949.26	1025.82	0.0806475	234.335	29.1066	205.228	14.6558	6.11031	117.537	89.3283	2.28	-1	0.7	0.0827937
5	GF5A_AHSI_W107.6_N40.7_20231206_005292_L10000072037	Craig_20231206	Craig	electricity	40.4627	-107.591	1939	GF5A	20231206	2023-12-06 20:05:46	2023-12-06 20:05:46	CO	MST	2023-12-06 13:05:46	6021	12/06/2023	13:05	892.1	893.5	809.405	812.53	0.00386036	91.1787	18.3868	72.7919	14.9327	4.10681	40.0655	12.2868	0.92	-1	0.7	0.0438375
6	GF5A_AHSI_W107.6_N40.7_20240606_007957_L10000134130	Craig_20240606	Craig	electricity	40.4627	-107.591	1939	GF5A	20240606	2024-06-06 20:02:05	2024-06-06 20:02:05	CO	MST	2024-06-06 13:02:05	6021	06/06/2024	13:02	497.9	547.3	453.181	486.348	0.0731865	58.6459	13.1661	45.4798	8.86614	7.02238	163.287	73.4791	1.35	-1	0.7	0.0434312
7	GF5A_AHSI_W107.8_N40.2_20230916_004111_L10000052906	Craig_20230916	Craig	electricity	40.4627	-107.591	1939	GF5A	20230916	2023-09-16 20:09:27	2023-09-16 20:09:27	CO	MST	2023-09-16 13:09:27	6021	09/16/2023	13:09	962.5	957.4	872.471	1106.22	0.267917	248.348	22.2922	226.056	13.8098	4.6119	120.903	90.2744	2.24	-1	0.7	0.0356901
8	GF5A_AHSI_W107.8_N40.2_20240613_008059_L10000136449	Craig_20240613	Craig	electricity	40.4627	-107.591	1939	GF5A	20240613	2024-06-13 20:03:23	2024-06-13 20:03:23	CO	MST	2024-06-13 13:03:23	6021	06/13/2024	13:03	1002.9	1051.9	912.038	1088.11	0.193049	155.023	32.3243	122.699	14.4225	11.5844	114.5	152.667	4	-1	0.7	0.0439935
9	GF5B_AHSI_W107.6_N40.7_20240113_012509_L10000452553	Craig_20240113	Craig	electricity	40.4627	-107.591	1939	GF5B	20240113	2024-01-14 02:13:26	2024-01-13 18:13:26	CO	MST	2024-01-13 11:13:26	6021	01/13/2024	11:13	1143.7	1144.1	1037.63	816.913	0.212709	207.371	24.4946	182.877	16.9289	7.11332	142.891	99.0712	2.08	-1	0.7	0.0431313
10	GF5A_AHSI_W108.5_N36.7_20240711_008467_L10000146576	Four Corners Steam Elec Station_20240711	Four Corners Steam Elec Station	electricity	36.69	-108.481	1630	GF5A	20240711	2024-07-11 20:09:06	2024-07-11 20:09:06	NM	MST	2024-07-11 13:09:06	2442	07/11/2024	13:09	1414.9	1415.2	1283.62	1452.54	0.131603	169.649	15.9469	153.702	6.25135	7.76358	95.5417	137.262	4.31	-1	0.7	0.0750688
11	GF5A_AHSI_W108.8_N36.7_20240407_007083_L10000113789	Four Corners Steam Elec Station_20240407	Four Corners Steam Elec Station	electricity	36.69	-108.481	1630	GF5A	20240407	2024-04-07 20:11:50	2024-04-07 20:11:50	NM	MST	2024-04-07 13:11:50	2442	04/07/2024	13:11	1033.2	1037.1	937.952	932.64	0.00566366	131.021	11.4322	119.589	4.95653	7.45664	41.9551	48.5281	3.47	1	1	0.04855
12	GF5A_AHSI_W100.9_N41.2_20230913_004068_L10000052333	Gerald Gentleman Station_20230913	Gerald Gentleman Station	electricity	41.0808	-101.141	948	GF5A	20230913	2023-09-13 19:40:39	2023-09-13 19:40:39	NE	CST	2023-09-13 13:40:39	6077	09/13/2023	13:40	1345.6	1339.6	1217.08	1418.35	0.165372	161.612	17.5578	144.054	6.18529	6.49617	131.893	199.159	4.53	1	1	0.0320312
13	GF5A_AHSI_W100.9_N41.2_20240610_008016_L10000135380	Gerald Gentleman Station_20240610	Gerald Gentleman Station	electricity	41.0808	-101.141	948	GF5A	20240610	2024-06-10 19:34:47	2024-06-10 19:34:47	NE	CST	2024-06-10 13:34:47	6077	06/10/2024	13:34	682.9	683.8	619.979	1029.38	0.660352	118.484	49.8136	68.6709	15.1211	10.9217	86.9803	240.646	8.3	-1	0.5	0.0355375
14	GF5A_AHSI_W101.1_N41.2_20240229_006530_L10000101560	Gerald Gentleman Station_20240229	Gerald Gentleman Station	electricity	41.0808	-101.141	948	GF5A	20240229	2024-02-29 19:37:26	2024-02-29 19:37:26	NE	CST	2024-02-29 13:37:26	6077	02/29/2024	13:37	236	237.4	214.879	274.908	0.279363	39.2755	10.1294	29.1462	3.69524	4.0914	6.0771	8.7105	4.3	-1	0.7	0.0833813
15	GF5A_AHSI_W101.2_N41.2_20240927_009603_L10000174913	Gerald Gentleman Station_20240927	Gerald Gentleman Station	electricity	41.0808	-101.141	948	GF5A	20240927	2024-09-27 19:34:25	2024-09-27 19:34:25	NE	CST	2024-09-27 13:34:25	6077	09/27/2024	13:34	1344	1343.3	1218.9	1251.74	0.0269482	221.254	11.1708	210.083	5.82703	6.94677	30.3649	26.9235	2.66	1	1	0.0659062
16	GF5B_AHSI_W100.9_N41.2_20220628_004292_L10000156032	Gerald Gentleman Station_20220628	Gerald Gentleman Station	electricity	41.0808	-101.141	948	GF5B	20220628	2022-06-29 01:41:40	2022-06-28 17:41:40	NE	CST	2022-06-28 11:41:40	6077	06/28/2022	11:41	1314.5	1320.1	1195.97	857.22	0.28324	93.0844	8.68113	84.4032	4.79302	17.4102	33.3561	22.2374	2	-1	0.7	0.0338313
17	GF5A_AHSI_W101.4_N35.3_20231018_004577_L10000059390	Harrington Station_20231018	Harrington Station	electricity	35.2972	-101.748	1090	GF5A	20231018	2023-10-18 19:47:26	2023-10-18 19:47:26	TX	CST	2023-10-18 13:47:26	6193	10/18/2023	13:47	153	145.45	133.434	249.161	0.867296	28.8382	11.062	17.7761	3.36537	4.21862	176.839	437.97	7.43	-1	0	0.0384437
18	GF5A_AHSI_W101.6_N35.3_20240411_007143_L10000114980	Harrington Station_20240411	Harrington Station	electricity	35.2972	-101.748	1090	GF5A	20240411	2024-04-11 19:44:10	2024-04-11 19:44:10	TX	CST	2024-04-11 13:44:10	6193	04/11/2024	13:44	635.1	519.6	499.314	401.218	0.196462	36.8873	4.54595	32.3413	3.70917	6.27586	114.976	5.36553	0.14	-1	0.7	0.0495437
19	GF5A_AHSI_W101.7_N35.3_20230328_001612_L10000019840	Harrington Station_20230328	Harrington Station	electricity	35.2972	-101.748	1090	GF5A	20230328	2023-03-28 19:54:51	2023-03-28 19:54:51	TX	CST	2023-03-28 13:54:51	6193	03/28/2023	13:54	482.6	483.5	438.542	624.278	0.42353	65.1036	5.45944	59.6441	3.26429	4.61273	5.25312	2.80166	1.6	1	1	0.0283312
20	GF5A_AHSI_W101.7_N35.3_20240213_006298_L10000094521	Harrington Station_20240213	Harrington Station	electricity	35.2972	-101.748	1090	GF5A	20240213	2024-02-13 19:45:52	2024-02-13 19:45:52	TX	CST	2024-02-13 13:45:52	6193	02/13/2024	13:45	324.6	326.6	295.833	176.766	0.402481	31.669	7.96111	23.7079	3.6404	4.12972	167.414	184.713	3.31	-1	0.7	0.0484812
21	GF5A_AHSI_W101.9_N35.3_20230904_003936_L10000050446	Harrington Station_20230904	Harrington Station	electricity	35.2972	-101.748	1090	GF5A	20230904	2023-09-04 19:50:29	2023-09-04 19:50:29	TX	CST	2023-09-04 13:50:29	6193	09/04/2023	13:50	760.5	701.1	645.008	498.187	0.227627	52.219	17.5896	34.6294	5.06564	4.67825	2.37178	6.12709	7.75	1	1	0.05045
22	GF5B_AHSI_W101.7_N35.3_20240301_013208_L10000477342	Harrington Station_20240301	Harrington Station	electricity	35.2972	-101.748	1090	GF5B	20240301	2024-03-02 01:44:39	2024-03-01 17:44:39	TX	CST	2024-03-01 11:44:39	6193	03/01/2024	11:44	142.7	143.5	129.987	180.45	0.388207	32.0713	12.6355	19.4358	4.67309	2.72557	126.835	178.414	4.22	-1	0.7	0.043975
23	GF5B_AHSI_W101.9_N35.3_20220424_003345_L10000118254	Harrington Station_20220424	Harrington Station	electricity	35.2972	-101.748	1090	GF5B	20220424	2022-04-25 01:38:35	2022-04-24 17:38:35	TX	CST	2022-04-24 11:38:35	6193	04/24/2022	11:38	296.2	292.8	266.755	335.819	0.258904	37.8916	12.1884	25.7032	3.88651	3.73307	17.6714	39.2305	6.66	-1	0.7	0.0448812
24	GF5B_AHSI_W101.9_N35.3_20240110_012465_L10000450920	Harrington Station_20240110	Harrington Station	electricity	35.2972	-101.748	1090	GF5B	20240110	2024-01-11 01:45:52	2024-01-10 17:45:52	TX	CST	2024-01-10 11:45:52	6193	01/10/2024	11:45	152.9	152.8	138.641	447.78	2.22979	50.4905	17.3135	33.177	5.70755	3.92516	173.211	404.16	7	1	0	0.0435875
25	GF5A_AHSI_W80.0_N39.2_20240312_006703_L10000103880	Harrison Power Station_20240312	Harrison Power Station	electricity	39.3844	-80.3325	299	GF5A	20240312	2024-03-12 18:14:51	2024-03-12 18:14:51	WV	EST	2024-03-12 13:14:51	3944	03/12/2024	13:14	1069.7	1073.1	971.135	1058.76	0.0902305	133.695	21.2249	112.47	7.93278	6.79152	108.609	155.311	4.29	-1	0.7	0.0412125
26	GF5A_AHSI_W80.1_N39.2_20231115_004984_L10000065474	Harrison Power Station_20231115	Harrison Power Station	electricity	39.3844	-80.3325	299	GF5A	20231115	2023-11-15 18:17:57	2023-11-15 18:17:57	WV	EST	2023-11-15 13:17:57	3944	11/15/2023	13:17	1970.3	1977.4	1789.25	1518.12	0.151531	195.677	22.9805	172.696	9.00685	5.51824	152.61	201.445	3.96	-1	0.7	0.0430625
27	GF5A_AHSI_W80.4_N39.2_20240319_006805_L10000106623	Harrison Power Station_20240319	Harrison Power Station	electricity	39.3844	-80.3325	299	GF5A	20240319	2024-03-19 18:16:18	2024-03-19 18:16:18	WV	EST	2024-03-19 13:16:18	3944	03/19/2024	13:16	1116	1043	994.758	869.14	0.12628	96.8088	22.3754	74.4333	6.78806	4.20272	41.7708	78.8076	5.66	-1	0.7	0.0414812
28	GF5A_AHSI_W80.5_N39.2_20230819_003702_L10000047101	Harrison Power Station_20230819	Harrison Power Station	electricity	39.3844	-80.3325	299	GF5A	20230819	2023-08-19 18:21:53	2023-08-19 18:21:53	WV	EST	2023-08-19 13:21:53	3944	08/19/2023	13:21	1369.6	1357.3	1238.57	1501.82	0.212539	155.112	15.3134	139.799	9.24066	9.94416	4.08119	1.76852	1.3	1	1	0.0481688
29	GF5B_AHSI_W80.2_N39.2_20240313_013382_L10000483618	Harrison Power Station_20240313	Harrison Power Station	electricity	39.3844	-80.3325	299	GF5B	20240313	2024-03-14 00:22:14	2024-03-13 16:22:14	WV	EST	2024-03-13 11:22:14	3944	03/13/2024	11:22	1067.4	1067.2	968.262	1595.96	0.648269	292.532	15.5337	276.999	7.26946	9.17965	19.6097	16.8644	2.58	1	1	0.063475
30	GF5B_AHSI_W80.4_N39.2_20240122_012639_L10000457433	Harrison Power Station_20240122	Harrison Power Station	electricity	39.3844	-80.3325	299	GF5B	20240122	2024-01-23 00:23:19	2024-01-22 16:23:19	WV	EST	2024-01-22 11:23:19	3944	01/22/2024	11:23	1467.2	1460.1	1328.55	794.509	0.401974	193.934	23.2574	170.676	12.6602	4.88978	158.937	113.905	2.15	-1	0.7	0.059925
31	GF5A_AHSI_W111.2_N39.2_20240928_009618_L10000175260	Hunter_20240928	Hunter	electricity	39.1747	-111.029	1725	GF5A	20240928	2024-09-28 20:16:35	2024-09-28 20:16:35	UT	MST	2024-09-28 13:16:35	6165	09/28/2024	13:16	538.7	545.3	490.297	411.026	0.161679	54.0921	14.7903	39.3018	9.71988	3.71266	148.89	79.9042	1.61	1	1	0.007
32	GF5A_AHSI_W98.0_N29.3_20230920_004169_L10000053680	J K Spruce_20230920	J K Spruce	electricity	29.3091	-98.3205	149	GF5A	20230920	2023-09-20 19:39:18	2023-09-20 19:39:18	TX	CST	2023-09-20 13:39:18	7097	09/20/2023	13:39	1303	1302.6	1181.83	1305.18	0.104374	201.492	12.3514	189.141	5.21595	11.3123	11.6499	11.8829	3.06	1	1	0.0139
33	GF5A_AHSI_W98.5_N29.3_20231217_005451_L10000075253	J K Spruce_20231217	J K Spruce	electricity	29.3091	-98.3205	149	GF5A	20231217	2023-12-17 19:38:50	2023-12-17 19:38:50	TX	CST	2023-12-17 13:38:50	7097	12/17/2023	13:38	556.7	558	505.777	544.717	0.076991	105.292	12.3423	92.95	5.44311	5.4731	69.7214	60.89	2.62	-1	0.7	0.0272312
34	GF5B_AHSI_W98.2_N29.3_20240204_012829_L10000463990	J K Spruce_20240204	J K Spruce	electricity	29.3091	-98.3205	149	GF5B	20240204	2024-02-05 01:25:53	2024-02-04 17:25:53	TX	CST	2024-02-04 11:25:53	7097	02/04/2024	11:25	534.5	536.5	485.646	813.11	0.674284	76.6666	22.3463	54.3203	6.14357	4.08228	14.8908	41.0987	8.28	-1	0.5	0.032375
35	GF5B_AHSI_W98.6_N29.3_20240211_012931_L10000467494	J K Spruce_20240211	J K Spruce	electricity	29.3091	-98.3205	149	GF5B	20240211	2024-02-12 01:27:36	2024-02-11 17:27:36	TX	CST	2024-02-11 11:27:36	7097	02/11/2024	11:27	559.5	524.3	493.2	642.294	0.302299	76.804	22.6856	54.1183	7.4029	4.10638	129.583	250.096	5.79	1	0.5	0.0255125
36	GF5A_AHSI_W108.6_N41.7_20240803_008802_L10000154428	Jim Bridger_20240803	Jim Bridger	electricity	41.7378	-108.787	2044	GF5A	20240803	2024-08-03 20:04:32	2024-08-03 20:04:32	WY	MST	2024-08-03 13:04:32	8066	08/03/2024	13:04	1441.8	1634.1	1319.61	602.329	0.543555	76.3075	12.0721	64.2354	5.13308	6.20308	60.3414	85.8859	4.27	-1	0.7	0.0390187
37	GF5A_AHSI_W94.7_N38.2_20231008_004431_L10000057166	La Cygne_20231008	La Cygne	electricity	38.3472	-94.6467	263	GF5A	20231008	2023-10-08 19:17:58	2023-10-08 19:17:58	KS	CST	2023-10-08 13:17:58	1241	10/08/2023	13:17	654.4	647.1	591.785	712.576	0.204112	107.715	14.5677	93.1475	6.10086	5.98225	123.505	139.972	3.4	-1	0.7	0.0483437
38	GF5A_AHSI_W94.6_N32.3_20240224_006456_L10000098053	Martin Lake_20240224	Martin Lake	electricity	32.2597	-94.5703	98	GF5A	20240224	2024-02-24 19:19:38	2024-02-24 19:19:38	TX	CST	2024-02-24 13:19:38	6146	02/24/2024	13:19	742.7	741.2	673.335	388.558	0.422935	50.7249	12.9035	37.8213	6.24763	4.90738	79.414	48.7072	1.84	-1	0.7	0.0406188
39	GF5A_AHSI_W94.8_N32.3_20240422_007301_L10000118547	Martin Lake_20240422	Martin Lake	electricity	32.2597	-94.5703	98	GF5A	20240422	2024-04-22 19:19:10	2024-04-22 19:19:10	TX	CST	2024-04-22 13:19:10	6146	04/22/2024	13:19	723.8	716.7	654.581	697.457	0.0655012	82.7734	17.9703	64.8031	9.80037	5.09303	84.381	36.0025	1.28	-1	0.7	0.0384437
40	GF5B_AHSI_W94.3_N32.3_20240404_013703_L10000494997	Martin Lake_20240404	Martin Lake	electricity	32.2597	-94.5703	98	GF5B	20240404	2024-04-05 01:12:16	2024-04-04 17:12:16	TX	CST	2024-04-04 11:12:16	6146	04/04/2024	11:12	1103	1115	1002.8	2158.81	1.15278	312.191	22.6503	289.541	8.67321	11.6365	82.4111	90.927	3.31	1	0	0.0385187
41	GF5B_AHSI_W94.4_N32.3_20230906_010629_L10000386730	Martin Lake_20230906	Martin Lake	electricity	32.2597	-94.5703	98	GF5B	20230906	2023-09-07 01:13:22	2023-09-06 17:13:22	TX	CST	2023-09-06 11:13:22	6146	09/06/2023	11:13	2665.3	2675.5	2419.92	1248.12	0.48423	225.217	20.7416	204.475	9.25999	7.09863	13.8401	12.5484	2.72	-1	0.7	0.0471312
42	GF5B_AHSI_W94.4_N32.3_20240213_012960_L10000468942	Martin Lake_20240213	Martin Lake	electricity	32.2597	-94.5703	98	GF5B	20240213	2024-02-14 01:13:08	2024-02-13 17:13:08	TX	CST	2024-02-13 11:13:08	6146	02/13/2024	11:13	1097.1	1103.7	996.57	1729.84	0.735798	177.503	16.4785	161.025	9.09611	5.53475	158.532	68.6973	1.3	-1	0.5	0.0434063
43	GF5B_AHSI_W94.5_N32.1_20230717_009886_L10000361780	Martin Lake_20230717	Martin Lake	electricity	32.2597	-94.5703	98	GF5B	20230717	2023-07-18 01:13:09	2023-07-17 17:13:09	TX	CST	2023-07-17 11:13:09	6146	07/17/2023	11:13	2491.4	2702.3	2301.61	2644.36	0.148916	327.919	27.7683	300.151	10.2314	10.9841	58.4662	77.3702	3.97	-1	0.7	0.0504062
44	GF5B_AHSI_W94.8_N32.3_20240601_014548_L10000524560	Martin Lake_20240601	Martin Lake	electricity	32.2597	-94.5703	98	GF5B	20240601	2024-06-02 01:13:43	2024-06-01 17:13:43	TX	CST	2024-06-01 11:13:43	6146	06/01/2024	11:13	647.8	634	584.962	1198.14	1.04823	134.112	20.3014	113.811	12.0335	7.34456	168.96	86.1696	1.53	-1	0	0.0445625
45	GF5A_AHSI_W94.0_N45.6_20240714_008510_L10000147652	Sherburne County_20240714	Sherburne County	electricity	45.3792	-93.8958	292	GF5A	20240714	2024-07-14 19:02:06	2024-07-14 19:02:06	MN	CST	2024-07-14 13:02:06	6090	07/14/2024	13:02	1646	1631.2	1492.78	976.163	0.346076	207.378	19.8667	187.511	10.0444	8.20767	3.07837	2.42165	2.36	1	1	0.0225125
46	GF5A_AHSI_W85.3_N38.7_20240414_007185_L10000115875	Trimble County_20240414	Trimble County	electricity	38.5847	-85.4117	144	GF5A	20240414	2024-04-14 18:35:41	2024-04-14 18:35:41	KY	EST	2024-04-14 13:35:41	6071	04/14/2024	13:35	1297.4	1354.6	1207.25	1627.57	0.34816	160.372	22.2127	138.159	6.67698	12.3829	18.0856	34.5434	5.73	1	1	0.045275
47	GF5A_AHSI_W92.0_N34.3_20240614_008073_L10000136769	White Bluff_20240614	White Bluff	electricity	34.4236	-92.1392	93	GF5A	20240614	2024-06-14 19:05:28	2024-06-14 19:05:28	AR	CST	2024-06-14 13:05:28	6009	06/14/2024	13:05	927.4	927.3	841.316	740.056	0.120359	90.6851	18.5436	72.1415	9.68779	9.13038	173.421	107.521	1.86	-1	0.7	0.0392125
