# Supplementary material for: Towards global carbon transparency: Spaceborne imaging spectroscopy enables precise CO2 emission quantification at facility scale
Source: Research Square preprint supplement (doi:10.21203/rs.3.rs-5913782/v1), 2025-01-29
Supplement: Supplementary file 36 [file 美国碳源反演(备份20250107).xlsx]

## Sheet: 2025.1
id	filename	foldername	facility	type	Latitude	Longitude	Altitude	satellite	date	Time of Satellite	UTC	State	Zone	Local Standard Time	Facility ID	day LST	time	前整点Q	后整点Q	avg Q(ton/h)	反演结果	反演误差	不确定度	IME_u (t/h)	Wind_u (t/h)	MF_u (ppm)	q	diff_dir	phi	风速	提取	排放	背景	备注
1	GF5_AHSI_W107.84_N40.19_20190803_006569_L10000052859	Craig_20190802	Craig		40.4627	-107.591	1939	GF5	20190803	2019-08-03 04:08:09	2019-08-02 20:08:09	CO	MST	2019-08-02 13:08:09	6021	08/02/2019	13:08	1356.3	1381	1233.4	1344.21	0.0898422	227.092	31.2875	195.804	13.1139	8.92822	0.0496497	0.0539527	3.26	-1	1	0.0749387
2	GF5_AHSI_W111.09_N39.21_20191118_008126_L10000065664	Hunter_20191118	Hunter		39.1747	-111.029	1725	GF5	20191118	2019-11-18 04:20:29	2019-11-17 20:20:29	UT	MST	2019-11-17 13:20:29	6165	11/17/2019	13:20	889	885.7	805.489	778.372	0.0336654	141.159	8.54858	132.61	11.0787	4.87569	154.047	46.7277	0.91	-1	0.5	0.0379813
3	GF5_AHSI_W85.14_N38.72_20191225_008664_L10000068784	Trimble County_20191225	Trimble County		38.5847	-85.4117	144	GF5	20191225	2019-12-25 02:36:43	2019-12-24 18:36:43	KY	EST	2019-12-24 13:36:43	6071	12/24/2019	13:36	1037.4	1080.8	964.737	881.145	0.0866473	162.864	12.6987	150.165	13.2767	5.94025	72.5191	25.6234	1.06	1	1	0.0151375
4	GF5A_AHSI_W108.6_N36.7_20231227_005597_L10000078715	Four Corners Steam Elec Station_20231227	Four Corners Steam Elec Station		36.69	-108.481	1630	GF5A	20231227	2023-12-27 20:12:59	2023-12-27 20:12:59	NM	MST	2023-12-27 13:12:59	2442	12/27/2023	13:12	797	796.8	722.99	722.862	0.000176413	101.997	22.0007	79.9961	7.54453	3.46592	136.315	199.02	4.38	-1	0.7	0.063725
5	GF5A_AHSI_W108.7_N41.7_20231213_005393_L10000074107	Jim Bridger_20231213	Jim Bridger		41.7378	-108.787	2044	GF5A	20231213	2023-12-13 20:08:54	2023-12-13 20:08:54	WY	MST	2023-12-13 13:08:54	8066	12/13/2023	13:08	1825.9	1677	1638.42	1039.72	0.365413	162.884	38.2842	124.599	15.2748	4.58016	90.6268	120.836	4	1	1	0.00498125
6	GF5A_AHSI_W108.8_N41.7_20230923_004213_L10000054221	Jim Bridger_20230923	Jim Bridger		41.7378	-108.787	2044	GF5A	20230923	2023-09-23 20:11:46	2023-09-23 20:11:46	WY	MST	2023-09-23 13:11:46	8066	09/23/2023	13:11	460.9	452.2	416.674	431.019	0.0344255	45.9476	12.7709	33.1767	3.56145	3.73375	18.7826	44.4523	7.1	-1	0	0.0335937
7	GF5A_AHSI_W94.3_N32.3_20230908_003994_L10000051261	Martin Lake_20230908	Martin Lake		32.2597	-94.5703	98	GF5A	20230908	2023-09-08 19:22:37	2023-09-08 19:22:37	TX	CST	2023-09-08 13:22:37	6146	09/08/2023	13:22	2712.1	2709.3	2459.44	3193.59	0.2985	468.412	32.3986	436.013	10.3617	12.2315	25.5736	29.6654	3.48	-1	1	0.0517125	有羽流、但周围水汽干扰也很大
8	GF5A_AHSI_W98.5_N29.3_20230814_003630_L10000044804	J K Spruce_20230814	J K Spruce		29.3091	-98.3205	149	GF5A	20230814	2023-08-14 19:42:15	2023-08-14 19:42:15	TX	CST	2023-08-14 13:42:15	7097	08/14/2023	13:42	1389.2	1408.7	1272.64	1158.62	0.0895951	388.638	10.462	378.176	5.58553	13.2034	23.8777	13.5307	1.7	1	1	0.022475	完美
9	GF5B_AHSI_W100.9_N41.2_20220628_004292_L10000156032	Gerald Gentleman Station_20220628	Gerald Gentleman Station		41.0808	-101.141	948	GF5B	20220628	2022-06-29 01:41:40	2022-06-28 17:41:40	NE	CST	2022-06-28 11:41:40	6077	06/28/2022	11:41	1314.5	1320.1	1195.97	320.312	0.732173	90.2751	7.52054	82.7545	4.08217	17.7581	34.6332	23.0888	2	1	0.5	0.0338313	24波段可见排放，有排放，但是算不准，靠近湖边
10	GF5B_AHSI_W101.1_N41.2_20211220_001524_L10000044164	Gerald Gentleman Station_20211220	Gerald Gentleman Station		41.0808	-101.141	948	GF5B	20211220	2021-12-21 01:37:21	2021-12-20 17:37:21	NE	CST	2021-12-20 11:37:21	6077	12/20/2021	11:37	1201.3	1283	1135.51	982.863	0.134428	134.232	19.5134	114.719	6.92002	4.1151	2.21453	3.04128	4.12	1	1	0.0158875
11	GF5B_AHSI_W101.6_N47.5_20220619_004161_L10000151101	Antelope Valley_20220619	Antelope Valley		47.371	-101.836	590	GF5B	20220619	2022-06-20 01:51:31	2022-06-19 17:51:31	ND	CST	2022-06-19 11:51:31	6469	06/19/2022	11:51	522.7	565.6	507.266	652.096	0.28551	91.0587	0	0	0	0	0	0	4.53	-1	1	0.0848688
12	GF5B_AHSI_W101.9_N35.3_20220424_003345_L10000118254	Harrington Station_20220424	Harrington Station		35.2972	-101.748	1090	GF5B	20220424	2022-04-25 01:38:35	2022-04-24 17:38:35	TX	CST	2022-04-24 11:38:35	6193	04/24/2022	11:38	296.2	292.8	266.755	239.799	0.101049	32.2762	13.011	19.2652	3.35679	4.0118	26.0483	57.8272	6.66	-1	0	0.0448812
13	GF5B_AHSI_W102.0_N47.5_20220316_002777_L10000118963	Antelope Valley_20220316	Antelope Valley		47.371	-101.836	590	GF5B	20220316	2022-03-17 01:50:55	2022-03-16 17:50:55	ND	CST	2022-03-16 11:50:55	6469	03/16/2022	11:50	560.6	524.1	480.974	1073.45	1.23183	110.344	0	0	0	0	0	0	9.18	-1	0	0.0401063
14	GF5B_AHSI_W102.1_N47.5_20220626_004263_L10000154923	Antelope Valley_20220626	Antelope Valley		47.371	-101.836	590	GF5B	20220626	2022-06-27 01:53:27	2022-06-26 17:53:27	ND	CST	2022-06-26 11:53:27	6469	06/26/2022	11:53	667	827.8	733.949	616.452	0.160088	96.0143	46.1308	49.8835	11.9129	4.75579	160.926	353.502	6.59	1	1	0.0692062	能看见一点
15	GF5B_AHSI_W107.5_N40.2_20230926_010921_L10000396892	Craig_20230926	Craig		40.4627	-107.591	1939	GF5B	20230926	2023-09-27 02:12:39	2023-09-26 18:12:39	CO	MST	2023-09-26 11:12:39	6021	09/26/2023	11:12	761.2	909.1	717.384	582.148	0.188512	105.592	6.37437	99.2175	6.90679	7.70087	15.9899	5.86296	1.1	-1	0.7	0.114356
16	GF5B_AHSI_W107.8_N40.7_20221018_005924_L10000222668	Craig_20221018	Craig		40.4627	-107.591	1939	GF5B	20221018	2022-10-19 02:11:02	2022-10-18 18:11:02	CO	MST	2022-10-18 11:11:02	6021	10/18/2022	11:11	830.6	831.6	753.674	782.382	0.0380902	281.196	8.67443	272.521	6.28696	5.99465	17.8427	9.69454	1.63	1	1	0.0565375	两个源
17	GF5B_AHSI_W108.2_N36.7_20220610_004030_L10000145798	Four Corners Steam Elec Station_20220610	Four Corners Steam Elec Station		36.69	-108.481	1630	GF5B	20220610	2022-06-11 02:06:07	2022-06-10 18:06:07	NM	MST	2022-06-10 11:06:07	2442	06/10/2022	11:06	1471.5	1052.86	1296.94	1045.56	0.193831	178.041	10.2721	167.768	4.29093	12.0658	3.81284	3.77471	2.97	1	1	0.0724875	完美
18	GF5B_AHSI_W108.3_N36.7_20220420_003287_L10000117219	Four Corners Steam Elec Station_20220420	Four Corners Steam Elec Station		36.69	-108.481	1630	GF5B	20220420	2022-04-21 02:05:10	2022-04-20 18:05:10	NM	MST	2022-04-20 11:05:10	2442	04/20/2022	11:05	539.3	621.1	495.429	498.394	0.0059847	114.847	7.48816	107.359	3.80584	5.72091	163.262	125.168	2.3	1	0.7	0.0774625	有排放
19	GF5B_AHSI_W108.3_N36.7_20240106_012407_L10000448627	Four Corners Steam Elec Station_20240106	Four Corners Steam Elec Station		36.69	-108.481	1630	GF5B	20240106	2024-01-07 02:12:33	2024-01-06 18:12:33	NM	MST	2024-01-06 11:12:33	2442	01/06/2024	11:12	1357.4	1191	1201.22	944.522	0.213699	178.258	17.2168	161.041	18.3808	6.58562	7.38659	3.2501	1.32	-1	1	0.0707125
20	GF5B_AHSI_W108.8_N41.7_20220212_002311_L10000077220	Jim Bridger_20220212	Jim Bridger		41.7378	-108.787	2044	GF5B	20220212	2022-02-13 02:10:06	2022-02-12 18:10:06	WY	MST	2022-02-12 11:10:06	8066	02/12/2022	11:10	580.1	545	520.951	959.038	0.840939	121.831	17.9118	103.919	6.28585	6.81142	81.2275	121.571	4.49	1	1	0.0355562	有排放，但周围噪声明显更大，不适合反演
21	GF5B_AHSI_W109.0_N41.6_20231031_011431_L10000413197	Jim Bridger_20231031	Jim Bridger		41.7378	-108.787	2044	GF5B	20231031	2023-11-01 02:20:04	2023-10-31 18:20:04	WY	MST	2023-10-31 11:20:04	8066	10/31/2023	11:20	1208.8	1174.8	1086.32	1126.23	0.0367326	114.73	17.5092	97.2206	5.39957	6.07954	40.2518	80.6378	6.01	-1	1	0.0386625
22	GF5B_AHSI_W109.1_N41.6_20231221_012174_L10000440228	Jim Bridger_20231221	Jim Bridger		41.7378	-108.787	2044	GF5B	20231221	2023-12-22 02:20:37	2023-12-21 18:20:37	WY	MST	2023-12-21 11:20:37	8066	12/21/2023	11:20	994.7	868	864.063	727.896	0.157589	135.093	26.349	108.744	11.9186	4.16996	111.755	118.46	3.18	1	0.7	0.0353
23	GF5B_AHSI_W110.9_N39.2_20220418_003258_L10000114473	Hunter_20220418	Hunter		39.1747	-111.029	1725	GF5B	20220418	2022-04-19 02:17:59	2022-04-18 18:17:59	UT	MST	2022-04-18 11:17:59	6165	04/18/2022	11:17	909.6	899.7	822.631	204.04	0.751966	38.2253	3.48844	34.7369	4.3404	8.96504	13.789	2.75779	0.6	1	-1	0.0246625	低风速
24	GF5B_AHSI_W110.9_N39.2_20240104_012378_L10000447404	Hunter_20240104	Hunter		39.1747	-111.029	1725	GF5B	20240104	2024-01-05 02:25:25	2024-01-04 18:25:25	UT	MST	2024-01-04 11:25:25	6165	01/04/2024	11:25	353.2	352.6	320.191	442.617	0.382354	84.9757	9.62234	75.3534	12.5416	4.7933	145.432	29.0864	0.6	1	0.7	0.0612625
25	GF5B_AHSI_W80.4_N39.2_20231012_011153_L10000404427	Harrison Power Station_20231012	Harrison Power Station		39.3844	-80.3325	299	GF5B	20231012	2023-10-13 00:23:33	2023-10-12 16:23:33	WV	EST	2023-10-12 11:23:33	3944	10/12/2023	11:23	229.9	228.3	208.005	301.463	0.449303	63.1814	11.8424	51.339	13.4931	8.14914	151.512	36.8678	0.73	-1	0.5	0.0482375	伪排放
26	GF5B_AHSI_W85.2_N38.7_20231031_011430_L10000413176	Trimble County_20231031	Trimble County		38.5847	-85.4117	144	GF5B	20231031	2023-11-01 00:42:01	2023-10-31 16:42:01	KY	EST	2023-10-31 11:42:01	6071	10/31/2023	11:42	278.2	284.99	256.691	1333.2	4.19379	234.1	36.201	197.899	12.4622	5.79847	43.9359	46.865	3.2	-1	0.5	0.048225	探测到了，但算的不准（该案例说明GF5的探测下限达到256t/h, 3m/s）
27	GF5B_AHSI_W85.3_N38.7_20230714_009842_L10000360353	Trimble County_20230714	Trimble County		38.5847	-85.4117	144	GF5B	20230714	2023-07-15 00:42:09	2023-07-14 16:42:09	KY	EST	2023-07-14 11:42:09	6071	07/14/2023	11:42	1373.5	1399.05	1262.24	1408.16	0.115603	567.813	18.8189	548.994	11.7326	8.67969	17.0975	8.66274	1.52	1	1	0.052025
28	GF5B_AHSI_W88.6_N37.1_20231212_012042_L10000435322	Shawnee_20231212	Shawnee		37.1517	-88.775	105	GF5B	20231212	2023-12-13 00:54:21	2023-12-12 16:54:21	KY	CST	2023-12-12 10:54:21	1379	12/12/2023	10:54	943.299	928	843.255	654.977	0.223275	218.77	17.5425	201.227	10.0329	5.19307	70.1176	41.3694	1.77	-1	0.5	0.0422063	羽流飘到了水面上，水汽干扰大
29	GF5B_AHSI_W88.6_N37.2_20220326_002922_L10000100107	Shawnee_20220326	Shawnee		37.1517	-88.775	105	GF5B	20220326	2022-03-27 00:46:28	2022-03-26 16:46:28	KY	CST	2022-03-26 10:46:28	1379	03/26/2022	10:46	811.401	780.998	714.945	682.177	0.0458324	84.8165	22.8793	61.9372	5.70976	4.92184	164.546	307.7	5.61	-1	0.5	0.0356438	羽流飘到了水面上，水汽干扰大
30	GF5B_AHSI_W88.7_N37.2_20230825_010454_L10000380643	Shawnee_20230825	Shawnee		37.1517	-88.775	105	GF5B	20230825	2023-08-26 00:54:41	2023-08-25 16:54:41	KY	CST	2023-08-25 10:54:41	1379	08/25/2023	10:54	1266.6	1261.2	1144.63	1030.71	0.0995315	218.154	27.307	190.847	10.8936	5.82927	119.088	103.607	2.61	-1	1	0.0513438	有排放，圆形，无羽流形状
31	GF5B_AHSI_W92.2_N34.3_20231006_011066_L10000401605	White Bluff_20231006	White Bluff		34.4236	-92.1392	93	GF5B	20231006	2023-10-07 01:05:59	2023-10-06 17:05:59	AR	CST	2023-10-06 11:05:59	6009	10/06/2023	11:05	320	380.1	294.843	641.862	1.17697	144.9	35.1048	109.795	15.1641	5.02304	57.9461	54.083	2.8	-1	0.5	0.0541813
32	GF5B_AHSI_W94.2_N45.6_20220602_003913_L10000141558	Sherburne County_20220602	Sherburne County		45.3792	-93.8958	292	GF5B	20220602	2022-06-03 01:19:01	2022-06-02 17:19:01	MN	CST	2022-06-02 11:19:01	6090	06/02/2022	11:19	411.9	411.2	373.468	645.212	0.727622	91.4887	25.5599	65.9288	7.21918	3.62487	6.88395	11.0602	4.82	-1	0.7	0.0019125
33	GF5B_AHSI_W94.3_N32.3_20231103_011474_L10000414550	Martin Lake_20231103	Martin Lake		32.2597	-94.5703	98	GF5B	20231103	2023-11-04 01:12:54	2023-11-03 17:12:54	TX	CST	2023-11-03 11:12:54	6146	11/03/2023	11:12	1488.1	1487.9	1349.95	1332.59	0.0128578	306.616	25.6223	280.994	11.5029	6.56282	43.5034	33.9327	2.34	-1	1	0.0659062	有羽流，水面噪声大
34	GF5B_AHSI_W94.5_N32.3_20220407_003097_L10000107611	Martin Lake_20220407	Martin Lake		32.2597	-94.5703	98	GF5B	20220407	2022-04-08 01:05:50	2022-04-07 17:05:50	TX	CST	2022-04-07 11:05:50	6146	04/07/2022	11:05	1469.4	1514	1336.39	1404.83	0.0512159	151.479	32.3251	119.154	7.85308	6.56677	35.2284	72.3356	6.16	-1	0.5	0.04465
35	GF5B_AHSI_W94.5_N38.2_20221019_005938_L10000223276	La Cygne_20221019	La Cygne		38.3472	-94.6467	263	GF5B	20221019	2022-10-20 01:15:33	2022-10-19 17:15:33	KS	CST	2022-10-19 11:15:33	1241	10/19/2022	11:15	708.8	713.2	644.01	562.161	0.127094	119.442	14.8894	104.552	5.70355	6.12348	159.848	138.535	2.6	-1	0.7	0.062575	32波段可见排放源
36	GF5B_AHSI_W96.5_N31.3_20221019_005938_L10000223290	Oak Grove_20221019	Oak Grove		31.185	-96.4853	129	GF5B	20221019	2022-10-20 01:17:28	2022-10-19 17:17:28	TX	CST	2022-10-19 11:17:28	6180	10/19/2022	11:17	1788.5	1803.2	1626.28	1882.38	0.157477	725.762	15.0926	710.669	8.3765	15.8355	46.3693	23.9575	1.55	-1	1	0.0297437	有排放
37	GF5B_AHSI_W96.9_N29.8_20221019_005938_L10000223293	Sam Seymour_20221019	Sam Seymour		29.9172	-96.7506	115	GF5B	20221019	2022-10-20 01:17:53	2022-10-19 17:17:53	TX	CST	2022-10-19 11:17:53	6179	10/19/2022	11:17	964.3	979	878.577	946.106	0.0768621	188.493	13.3101	175.183	4.82658	6.19834	158.954	138.29	2.61	-1	0.7	0.0209875
38	ZY1E_AHSI_W101.24_N41.04_20230805_020428_L1A0000637084	Gerald Gentleman Station_20230805	Gerald Gentleman Station		41.0808	-101.141	948	ZY1E	20230805	2023-08-05 17:48:20	2023-08-05 17:48:20	NE	CST	2023-08-05 11:48:20	6077	08/05/2023	11:48	1358.5	1357.1	1231.39	2630.01	1.1358	269.466	42.7032	226.762	11.5827	9.23269	18.0385	36.1974	6.02	-1	0.7	0.0268563
39	ZY1E_AHSI_W101.46_N35.28_20220305_012995_L1A0000414997	Harrington Station_20220305	Harrington Station		35.2972	-101.748	1090	ZY1E	20220305	2022-03-05 17:52:24	2022-03-05 17:52:24	TX	CST	2022-03-05 11:52:24	6193	03/05/2022	11:52	167.2	177.3	159.622	174.992	0.0962915	25.0806	14.5438	10.5368	3.75513	5.06128	128.997	462.67	10.76	-1	0	0.0934062	排放强度太低了，无法检测到
40	ZY1E_AHSI_W101.95_N35.28_20220331_013368_L1A0000427095	Harrington Station_20220331	Harrington Station		35.2972	-101.748	1090	ZY1E	20220331	2022-03-31 17:54:08	2022-03-31 17:54:08	TX	CST	2022-03-31 11:54:08	6193	03/31/2022	11:54	641.9	638.7	579.709	592.59	0.0222198	65.7627	9.42525	56.3375	2.77909	7.28989	11.6654	20.5311	5.28	1	1	0.0470625
41	ZY1E_AHSI_W101.95_N47.64_20201123_006296_L1A0000193277	Antelope Valley_20201123	Antelope Valley		47.371	-101.836	590	ZY1E	20201123	2020-11-23 18:05:58	2020-11-23 18:05:58	ND	CST	2020-11-23 12:05:58	6469	11/23/2020	12:05	372.7	365.9	337.594	715.903	1.12061	93.9723	35.1153	58.857	11.3381	7.28168	82.5604	177.23	6.44	-1	0	0.0524937	这一景还是不太好反演
42	ZY1E_AHSI_W104.76_N41.92_20230917_021045_L1A0000655064	Laramie River_20230917	Laramie River		42.1103	-104.883	1393	ZY1E	20230917	2023-09-17 18:02:08	2023-09-17 18:02:08	WY	MST	2023-09-17 11:02:08	6204	09/17/2023	11:02	1667.1	1881.6	1518.85	1537.62	0.0123539	140.641	29.1246	111.517	7.15273	4.26008	4.47853	11.6292	7.79	-1	0.7	0.0451063	羽流良好
43	ZY1E_AHSI_W104.93_N41.92_20230625_019840_L1A0000620580	Laramie River_20230625	Laramie River		42.1103	-104.883	1393	ZY1E	20230625	2023-06-25 18:05:08	2023-06-25 18:05:08	WY	MST	2023-06-25 11:05:08	6204	06/25/2023	11:05	1043.4	1114.7	951.947	1035.47	0.0877375	216.48	16.7607	199.72	7.67589	12.7741	130.201	109.369	2.52	1	0.7	0.066525	有排放
44	ZY1E_AHSI_W105.13_N42.36_20200825_005004_L1A0000136593	Laramie River_20200825	Laramie River		42.1103	-104.883	1393	ZY1E	20200825	2020-08-25 18:10:51	2020-08-25 18:10:51	WY	MST	2020-08-25 11:10:51	6204	08/25/2020	11:10	520.3	520.5	472.038	476.611	0.00968621	82.0894	9.71436	72.375	3.9495	7.87273	166.261	173.466	3.13	-1	0.7	0.168362
45	ZY1E_AHSI_W107.47_N40.60_20231007_021332_L1A0000663395	Craig_20231007	Craig		40.4627	-107.591	1939	ZY1E	20231007	2023-10-07 18:11:00	2023-10-07 18:11:00	CO	MST	2023-10-07 11:11:00	6021	10/07/2023	11:11	487.2	518.1	447.12	524.459	0.172973	96.8314	7.40485	89.4266	7.60493	3.99984	3.91042	1.77272	1.36	1	0.7	0.0556	有排放 不像羽流
46	ZY1E_AHSI_W107.63_N40.60_20230715_020127_L1A0000628485	Craig_20230715	Craig		40.4627	-107.591	1939	ZY1E	20230715	2023-07-15 18:14:00	2023-07-15 18:14:00	CO	MST	2023-07-15 11:14:00	6021	07/15/2023	11:14	892.4	903.4	811.9	922.144	0.135785	168.974	11.8531	157.121	5.29372	7.37291	174.378	163.334	2.81	-1	0.7	0.0421625	19波段较好
47	ZY1E_AHSI_W108.64_N36.61_20200917_005334_L1A0000154763	Four Corners Steam Elec Station_20200917	Four Corners Steam Elec Station		36.69	-108.481	1630	ZY1E	20200917	2020-09-17 18:19:28	2020-09-17 18:19:28	NM	MST	2020-09-17 11:19:28	2442	09/17/2020	11:19	1507.6	1506	1367.21	1051.33	0.231042	194.481	7.97168	186.509	3.53832	8.07619	58.6515	52.9819	2.71	-1	1	0.07115	羽流形状好
48	ZY1E_AHSI_W108.68_N41.92_20200911_005248_L1A0000148906	Jim Bridger_20200911	Jim Bridger		41.7378	-108.787	2044	ZY1E	20200911	2020-09-11 18:24:53	2020-09-11 18:24:53	WY	MST	2020-09-11 11:24:53	8066	09/11/2020	11:24	1437.4	1314.4	1259.35	1320.65	0.048676	117.515	15.9541	101.56	4.81464	6.13111	61.48	145.708	7.11	-1	1	0.063525	排放位置在山上，不像排放源
49	ZY1E_AHSI_W108.72_N36.61_20231007_021332_L1A0000663404	Four Corners Steam Elec Station_20231007	Four Corners Steam Elec Station		36.69	-108.481	1630	ZY1E	20231007	2023-10-07 18:12:07	2023-10-07 18:12:07	NM	MST	2023-10-07 11:12:07	2442	10/07/2023	11:12	1532.3	1509.9	1386.01	884.423	0.361895	294.97	6.29269	288.677	4.01177	10.2965	16.9179	9.58681	1.7	1	1	0.075475	羽流很完整，可以作为案例
50	ZY1E_AHSI_W108.78_N41.92_20200813_004832_L1A0000126505	Jim Bridger_20200813	Jim Bridger		41.7378	-108.787	2044	ZY1E	20200813	2020-08-13 18:24:46	2020-08-13 18:24:46	WY	MST	2020-08-13 11:24:46	8066	08/13/2020	11:24	1902.1	1640.8	1630.74	642.505	0.606003	68.6564	8.7021	59.9543	2.79667	8.065	33.6239	60.6352	5.41	-1	0.7	0.0555812	羽流形状很好，不过怎么风速有点问题
51	ZY1E_AHSI_W111.21_N39.27_20201004_005578_L1A0000168618	Hunter_20201004	Hunter		39.1747	-111.029	1725	ZY1E	20201004	2020-10-04 18:32:36	2020-10-04 18:32:36	UT	MST	2020-10-04 11:32:36	6165	10/04/2020	11:32	656	681.6	607.499	727.893	0.198179	182.688	9.7731	172.915	5.38353	6.53669	51.1708	36.3313	2.13	1	1	0.0165812	完美
52	ZY1E_AHSI_W111.31_N39.27_20200905_005163_L1A0000144224	Hunter_20200905	Hunter		39.1747	-111.029	1725	ZY1E	20200905	2020-09-05 18:32:32	2020-09-05 18:32:32	UT	MST	2020-09-05 11:32:32	6165	09/05/2020	11:32	1057.9	1295.6	1074.72	781.744	0.272605	223.755	8.52196	215.233	4.98158	7.59946	70.1642	44.6712	1.91	-1	0.7	0	有羽流
53	ZY1E_AHSI_W85.49_N38.38_20220327_013308_L1A0000425150	Trimble County_20220327	Trimble County		38.5847	-85.4117	144	ZY1E	20220327	2022-03-27 16:51:14	2022-03-27 16:51:14	KY	EST	2022-03-27 11:51:14	6071	03/27/2022	11:51	412.9	409.2	371.723	292.157	0.214047	58.0589	19.6576	38.4013	6.39083	4.69778	179.691	216.827	3.62	-1	0	0.0470625
54	ZY1E_AHSI_W86.17_N36.17_20220327_013308_L1A0000425155	Gallatin_20220327	Gallatin		36.3156	-86.4006	140	ZY1E	20220327	2022-03-27 16:51:51	2022-03-27 16:51:51	TN	CST	2022-03-27 10:51:51	3403	03/27/2022	10:51	307	306.4	278.043	250.397	0.0994309	72.6156	23.3976	49.218	9.49795	2.68062	41.7127	34.4825	2.48	1	0	0.0394375
55	ZY1E_AHSI_W86.59_N36.17_20221004_016048_L1A0000511602	Gallatin_20221004	Gallatin		36.3156	-86.4006	140	ZY1E	20221004	2022-10-04 16:51:33	2022-10-04 16:51:33	TN	CST	2022-10-04 10:51:33	3403	10/04/2022	10:51	758.6	764.3	692.586	644.136	0.069955	125.972	16.1182	109.854	13.2383	7.45837	122.221	60.2956	1.48	-1	0.7	0.0308563	像伪排放源
56	ZY1E_AHSI_W88.87_N37.06_20211128_011601_L1A0000371189	Shawnee_20211128	Shawnee		37.1517	-88.775	105	ZY1E	20211128	2021-11-28 17:03:59	2021-11-28 17:03:59	KY	CST	2021-11-28 11:03:59	1379	11/28/2021	11:03	406.4	406.4	368.68	449.152	0.218271	88.6796	27.867	60.8126	10.4627	5.18198	172.419	201.73	3.51	-1	0.5	0.0540062	有排放
57	ZY1E_AHSI_W88.95_N37.06_20210119_007111_L1A0000229838	Shawnee_20210119	Shawnee		37.1517	-88.775	105	ZY1E	20210119	2021-01-19 17:02:53	2021-01-19 17:02:53	KY	CST	2021-01-19 11:02:53	1379	01/19/2021	11:02	868.501	669.401	781.87	798.541	0.0213221	313.056	17.7871	295.269	11.3209	4.01422	118.758	62.15	1.57	1	0.7	0.0245437	右下角伪排放源
58	ZY1E_AHSI_W89.08_N37.06_20201221_006696_L1A0000212411	Shawnee_20201221	Shawnee		37.1517	-88.775	105	ZY1E	20201221	2020-12-21 17:03:04	2020-12-21 17:03:04	KY	CST	2020-12-21 11:03:04	1379	12/21/2020	11:03	386.9	386.599	350.976	715.623	1.03895	94.7657	35.9318	58.8339	10.7543	5.43337	62.6197	134.424	6.44	-1	0	0.0490688
59	ZY1E_AHSI_W90.79_N38.83_20210925_010683_L1A0000340283	Labadie_20210925	Labadie		38.5583	-90.8361	146	ZY1E	20210925	2021-09-25 17:13:23	2021-09-25 17:13:23	MO	CST	2021-09-25 11:13:23	2103	09/25/2021	11:13	1746.6	1732.6	1581.74	1621.73	0.0252845	295.128	32.0663	263.062	12.5838	6.72634	3.18805	3.12428	2.94	-1	1	0.168331
60	ZY1E_AHSI_W90.90_N38.38_20220113_012261_L1A0000391512	Labadie_20220113	Labadie		38.5583	-90.8361	146	ZY1E	20220113	2022-01-13 17:13:19	2022-01-13 17:13:19	MO	CST	2022-01-13 11:13:19	2103	01/13/2022	11:13	1841.4	1849.6	1672.1	1457.75	0.128192	488.048	24.6598	463.388	14.7423	4.37293	126.709	73.0688	1.73	-1	0.7	0.041875
61	ZY1E_AHSI_W90.98_N38.38_20230329_018573_L1A0000585856	Labadie_20230329	Labadie		38.5583	-90.8361	146	ZY1E	20230329	2023-03-29 17:07:56	2023-03-29 17:07:56	MO	CST	2023-03-29 11:07:56	2103	03/29/2023	11:07	2464.5	2453.2	2234.56	1984.41	0.111946	738.968	12.6796	726.288	7.05535	6.71623	5.21618	2.74719	1.58	1	0.7	0.0442688	羽流沿着江面规整陈列
62	ZY1E_AHSI_W91.94_N34.40_20220726_015044_L1A0000481359	White Bluff_20220726	White Bluff		34.4236	-92.1392	93	ZY1E	20220726	2022-07-26 17:12:13	2022-07-26 17:12:13	AR	CST	2022-07-26 11:12:13	6009	07/26/2022	11:12	1389.4	1742.2	1324.45	1033.66	0.219556	186.887	36.3198	150.568	14.0645	6.64681	113.889	123.759	3.26	-1	0.7	0.0465062	微弱的排放
63	ZY1E_AHSI_W92.11_N34.40_20220113_012261_L1A0000391521	White Bluff_20220113	White Bluff		34.4236	-92.1392	93	ZY1E	20220113	2022-01-13 17:14:27	2022-01-13 17:14:27	AR	CST	2022-01-13 11:14:27	6009	01/13/2022	11:14	901.3	897.1	816.757	700.089	0.142843	180.967	28.5091	152.458	15.132	8.52773	97.2446	73.9059	2.28	-1	0.7	0.0509625	没有排放
64	ZY1E_AHSI_W92.15_N34.40_20220309_013050_L1A0000416988	White Bluff_20220309	White Bluff		34.4236	-92.1392	93	ZY1E	20220309	2022-03-09 17:14:19	2022-03-09 17:14:19	AR	CST	2022-03-09 11:14:19	6009	03/09/2022	11:14	280.3	279.1	254.03	1630.62	5.41899	305.085	29.4081	275.677	11.1307	10.4231	8.43599	7.95795	2.83	1	0.5	0.0207437	很多云，不适合反演
65	ZY1E_AHSI_W92.33_N34.40_20231104_021729_L1A0000674441	White Bluff_20231104	White Bluff		34.4236	-92.1392	93	ZY1E	20231104	2023-11-04 17:03:42	2023-11-04 17:03:42	AR	CST	2023-11-04 11:03:42	6009	11/04/2023	11:03	537.3	433.2	482.708	423.694	0.122256	87.3324	15.156	72.1763	15.5452	5.34963	106.273	30.4649	0.86	1	0.7	0.0518812
66	ZY1E_AHSI_W93.56_N45.45_20220320_013210_L1A0000421897	Sherburne County_20220320	Sherburne County		45.3792	-93.8958	292	ZY1E	20220320	2022-03-20 17:31:14	2022-03-20 17:31:14	MN	CST	2022-03-20 11:31:14	6090	03/20/2022	11:31	1451.2	1311.2	1250.89	1144.46	0.0850802	341.788	26.6903	315.098	14.2855	5.30546	7.7909	4.9602	1.91	-1	0.7	0.048475
67	ZY1E_AHSI_W94.02_N45.45_20220927_015948_L1A0000508557	Sherburne County_20220927	Sherburne County		45.3792	-93.8958	292	ZY1E	20220927	2022-09-27 17:31:08	2022-09-27 17:31:08	MN	CST	2022-09-27 11:31:08	6090	09/27/2022	11:31	1052.9	1052.9	955.175	1382.65	0.447536	243.552	46.9901	196.562	17.9028	4.84401	31.1443	34.6739	3.34	-1	1	0.0586125	有羽流
68	ZY1E_AHSI_W94.33_N38.38_20211206_011716_L1A0000374910	La Cygne_20211206	La Cygne		38.3472	-94.6467	263	ZY1E	20211206	2021-12-06 17:27:03	2021-12-06 17:27:03	KS	CST	2021-12-06 11:27:03	1241	12/06/2021	11:27	365.5	442.9	363.173	490.908	0.351719	85.1583	34.6554	50.5029	10.4737	5.49401	151.37	241.183	4.78	-1	0.5	0.126694
69	ZY1E_AHSI_W94.40_N32.17_20210401_008144_L1A0000261751	Martin Lake_20210401	Martin Lake		32.2597	-94.5703	98	ZY1E	20210401	2021-04-01 17:20:59	2021-04-01 17:20:59	TX	CST	2021-04-01 11:20:59	6146	04/01/2021	11:20	1201.3	1170.4	1080.46	1059.65	0.0192556	188.597	23.8504	164.747	8.81267	5.9326	171.058	174.48	3.06	-1	0.7	0.04435	有羽流
70	ZY1E_AHSI_W94.44_N38.38_20210913_010511_L1A0000334632	La Cygne_20210913	La Cygne		38.3472	-94.6467	263	ZY1E	20210913	2021-09-13 17:27:32	2021-09-13 17:27:32	KS	CST	2021-09-13 11:27:32	1241	09/13/2021	11:27	662.6	671	604.53	689.658	0.140818	104.641	40.2865	64.3543	12.5772	6.41225	65.0996	117.396	5.41	-1	0.5	0.044475
71	ZY1E_AHSI_W94.49_N38.38_20200711_004357_L1A0000107667	La Cygne_20200711	La Cygne		38.3472	-94.6467	263	ZY1E	20200711	2020-07-11 17:23:19	2020-07-11 17:23:19	KS	CST	2020-07-11 11:23:19	1241	07/11/2020	11:23	1601.4	1598	1451.58	1985.59	0.367878	381.179	30.385	350.794	12.2096	13.0798	12.8202	11.6237	2.72	1	1	0.0438062	反演效果不好，只有一团排放；感觉有点像是把水汽也核算进去了，偏高很多；误差太大了
72	ZY1E_AHSI_W94.59_N32.17_20220303_012967_L1A0000414108	Martin Lake_20220303	Martin Lake		32.2597	-94.5703	98	ZY1E	20220303	2022-03-03 17:22:15	2022-03-03 17:22:15	TX	CST	2022-03-03 11:22:15	6146	03/03/2022	11:22	1866.9	1838.5	1684.18	846.558	0.497346	152.315	8.19993	144.115	8.59914	7.33234	18.3848	3.5544	0.58	-1	-1	0.0434438	这一景本应该能够看到完美羽流的，但是羽流的方向刚好经过了湖面，导致出现一段非常大的异常高值
73	ZY1E_AHSI_W94.77_N32.17_20210104_006896_L1A0000221658	Martin Lake_20210104	Martin Lake		32.2597	-94.5703	98	ZY1E	20210104	2021-01-04 17:21:40	2021-01-04 17:21:40	TX	CST	2021-01-04 11:21:40	6146	01/04/2021	11:21	1286	1418.3	1208.65	1615.17	0.336349	451.873	22.8756	428.997	12.415	4.82149	62.5749	40.8823	1.96	-1	0.5	0.0507375	水汽干扰大，几乎无反演结果
74	ZY1E_AHSI_W96.19_N31.29_20220130_012507_L1A0000399543	Oak Grove_20220130	Oak Grove		31.185	-96.4853	129	ZY1E	20220130	2022-01-30 17:28:05	2022-01-30 17:28:05	TX	CST	2022-01-30 11:28:05	6180	01/30/2022	11:28	1396	1398.9	1267.66	1110.9	0.123657	143.429	25.8961	117.533	7.77691	7.51298	81.3964	125.351	4.62	-1	1	0.0780688
75	ZY1E_AHSI_W96.23_N31.29_20220326_013296_L1A0000424559	Oak Grove_20220326	Oak Grove		31.185	-96.4853	129	ZY1E	20220326	2022-03-26 17:27:55	2022-03-26 17:27:55	TX	CST	2022-03-26 11:27:55	6180	03/26/2022	11:27	767.3	835.6	723.965	853.005	0.17824	140.435	17.6991	122.736	6.38186	8.32344	9.15534	10.0709	3.3	-1	0.7	0.0251563
76	ZY1E_AHSI_W96.26_N31.29_20201006_005607_L1A0000169633	Oak Grove_20201006	Oak Grove		31.185	-96.4853	129	ZY1E	20201006	2020-10-06 17:25:38	2020-10-06 17:25:38	TX	CST	2020-10-06 11:25:38	6180	10/06/2020	11:25	1874.4	1879.2	1702.24	1691.52	0.00629706	479.762	20.7781	458.984	11.2244	8.95246	5.30203	3.41097	1.93	-1	1	0.0304312	有排放，无羽流
77	ZY1E_AHSI_W96.28_N31.29_20210424_008474_L1A0000271419	Oak Grove_20210424	Oak Grove		31.185	-96.4853	129	ZY1E	20210424	2021-04-24 17:27:56	2021-04-24 17:27:56	TX	CST	2021-04-24 11:27:56	6180	04/24/2021	11:27	893.6	900.9	813.64	1361.96	0.673904	145.479	27.0552	118.424	7.83286	9.35274	170.593	338.343	5.95	-1	0.7	0.0375562	偏高
78	ZY1E_AHSI_W96.41_N31.29_20211206_011716_L1A0000374926	Oak Grove_20211206	Oak Grove		31.185	-96.4853	129	ZY1E	20211206	2021-12-06 17:29:06	2021-12-06 17:29:06	TX	CST	2021-12-06 11:29:06	6180	12/06/2021	11:29	1798.7	1790.1	1627.98	1645.36	0.0106756	166.497	46.8775	119.62	11.8851	6.42153	157.652	407.793	7.76	-1	0.7	0.0217938	有一点点羽流
79	ZY1E_AHSI_W96.55_N29.95_20220130_012507_L1A0000399546	Sam Seymour_20220130	Sam Seymour		29.9172	-96.7506	115	ZY1E	20220130	2022-01-30 17:28:28	2022-01-30 17:28:28	TX	CST	2022-01-30 11:28:28	6179	01/30/2022	11:28	1394.8	1390.4	1263.48	1062.08	0.159399	198.108	18.5491	179.559	7.14322	8.34369	20.4007	19.2446	2.83	-1	0.7	0.0214875
80	ZY1E_AHSI_W96.58_N31.29_20200711_004359_L1A0000107694	Oak Grove_20200711	Oak Grove		31.185	-96.4853	129	ZY1E	20200711	2020-07-11 17:25:19	2020-07-11 17:25:19	TX	CST	2020-07-11 11:25:19	6180	07/11/2020	11:25	1869.6	1875.6	1698.34	2003.65	0.179769	316.313	24.4528	291.86	8.32176	13.6196	2.80795	3.0513	3.26	1	1	0.0343313	羽流可以
81	ZY1E_AHSI_W96.59_N29.95_20220326_013296_L1A0000424562	Sam Seymour_20220326	Sam Seymour		29.9172	-96.7506	115	ZY1E	20220326	2022-03-26 17:28:17	2022-03-26 17:28:17	TX	CST	2022-03-26 11:28:17	6179	03/26/2022	11:28	1765.4	1773.9	1605.14	1604.36	0.000489524	213.008	19.8719	193.136	6.40182	10.5284	28.9429	38.3976	3.98	-1	1	0.083525	能看到排放，但羽流飘到了湖面上
82	ZY1E_AHSI_W96.65_N29.95_20210424_008474_L1A0000271422	Sam Seymour_20210424	Sam Seymour		29.9172	-96.7506	115	ZY1E	20210424	2021-04-24 17:28:19	2021-04-24 17:28:19	TX	CST	2021-04-24 11:28:19	6179	04/24/2021	11:28	1037.5	1164.7	995.055	1175.94	0.181786	122.078	22.2232	99.8549	6.03953	5.94939	174.617	357.965	6.15	-1	0.7	0.0373
83	ZY1E_AHSI_W96.74_N31.10_20200612_003941_L1A0000093912	Oak Grove_20200612	Oak Grove		31.185	-96.4853	129	ZY1E	20200612	2020-06-12 17:25:12	2020-06-12 17:25:12	TX	CST	2020-06-12 11:25:12	6180	06/12/2020	11:25	1759.1	1762.5	1597.11	1852.99	0.16021	255.735	33.6732	222.061	10.8384	10.2558	11.5461	15.3947	4	-1	1	0.0377062	排放羽流很清晰
84	ZY1E_AHSI_W96.95_N29.95_20200711_004359_L1A0000107697	Sam Seymour_20200711	Sam Seymour		29.9172	-96.7506	115	ZY1E	20200711	2020-07-11 17:25:42	2020-07-11 17:25:42	TX	CST	2020-07-11 11:25:42	6179	07/11/2020	11:25	1793.1	1824.9	1638.69	1536.89	0.0621261	275.409	14.566	260.843	5.56631	16.4541	35.0831	32.9782	2.82	-1	1	0.0312375	有羽流，还不错，飘到水面上了，前16波段清晰；作为强吸收和弱吸收的案例
85	ZY1E_AHSI_W97.05_N29.95_20200612_003941_L1A0000093915	Sam Seymour_20200612	Sam Seymour		29.9172	-96.7506	115	ZY1E	20200612	2020-06-12 17:25:31	2020-06-12 17:25:31	TX	CST	2020-06-12 11:25:31	6179	06/12/2020	11:25	1467.5	1562.8	1367.32	1736.2	0.269784	248.268	21.2535	227.015	6.68245	14.6251	15.5828	18.9072	3.64	-1	1	0.0149875	羽流形状很好，可以作为案例
86	ZY1E_AHSI_W98.07_N29.51_20220930_015991_L1A0000509878	J K Spruce_20220930	J K Spruce		29.3091	-98.3205	149	ZY1E	20220930	2022-09-30 17:31:53	2022-09-30 17:31:53	TX	CST	2022-09-30 11:31:53	7097	09/30/2022	11:31	1501.1	1499.5	1361.03	1185.96	0.12863	436.186	14.9665	421.219	8.62206	13.9164	41.2876	22.1577	1.61	-1	1	0.00560625	有噪声，有羽流
87	ZY1E_AHSI_W98.20_N29.06_20220418_013626_L1A0000435959	J K Spruce_20220418	J K Spruce		29.3091	-98.3205	149	ZY1E	20220418	2022-04-18 17:33:49	2022-04-18 17:33:49	TX	CST	2022-04-18 11:33:49	7097	04/18/2022	11:33	629.1	628.9	570.61	658.333	0.153735	76.0849	21.961	54.1239	5.68521	7.0491	176.019	377.854	6.44	-1	0.7	0.032525
88	ZY1E_AHSI_W98.50_N29.51_20200930_005521_L1A0000170469	J K Spruce_20200930	J K Spruce		29.3091	-98.3205	149	ZY1E	20200930	2020-09-30 17:33:03	2020-09-30 17:33:03	TX	CST	2020-09-30 11:33:03	7097	09/30/2020	11:33	914.9	958.2	851.588	1072.99	0.259989	179.852	19.5525	160.3	6.85717	9.71607	108.472	114.981	3.18	-1	1	0.0273688
89	ZY1E_AHSI_W98.51_N29.06_20201029_005935_L1A0000194928	J K Spruce_20201029	J K Spruce		29.3091	-98.3205	149	ZY1E	20201029	2020-10-29 17:33:12	2020-10-29 17:33:12	TX	CST	2020-10-29 11:33:12	7097	10/29/2020	11:33	508.1	564.9	489.281	533.632	0.0906455	68.5475	27.7358	40.8117	7.12577	4.82762	6.66329	15.9253	7.17	1	0.7	0.012475	有团块排放
90	ZY1E_AHSI_W98.53_N29.51_20220514_013997_L1A0000447750	J K Spruce_20220514	J K Spruce		29.3091	-98.3205	149	ZY1E	20220514	2022-05-14 17:35:16	2022-05-14 17:35:16	TX	CST	2022-05-14 11:35:16	7097	05/14/2022	11:35	1041	1035.2	941.31	1212.5	0.288103	304.593	14.7772	289.816	6.7706	13.034	23.814	16.8286	2.12	-1	1	0.0990188
91	ZY1F_AHSI_W101.04_N41.04_20230916_009032_L1A0000537816	Gerald Gentleman Station_20230916	Gerald Gentleman Station		41.0808	-101.141	948	ZY1F	20230916	2023-09-16 18:00:26	2023-09-16 18:00:26	NE	CST	2023-09-16 12:00:26	6077	09/16/2023	12:00	1330.8	1109.2	1207.28	1409.53	0.167521	188.148	17.6917	170.456	5.81854	16.2368	30.4328	40.1713	3.96	1	0.7	0.034175
92	ZY1F_AHSI_W101.05_N41.04_20231110_009821_L1A0000582861	Gerald Gentleman Station_20231110	Gerald Gentleman Station		41.0808	-101.141	948	ZY1F	20231110	2023-11-10 18:01:07	2023-11-10 18:01:07	NE	CST	2023-11-10 12:01:07	6077	11/10/2023	12:01	1304.1	1307.4	1183.11	1212.01	0.0244283	137.707	15.0947	122.612	4.39306	5.58515	81.8445	133.134	4.88	-1	0.7	0.0268812
93	ZY1F_AHSI_W101.48_N41.04_20230624_007827_L1A0000469131	Gerald Gentleman Station_20230624	Gerald Gentleman Station		41.0808	-101.141	948	ZY1F	20230624	2023-06-24 18:00:53	2023-06-24 18:00:53	NE	CST	2023-06-24 12:00:53	6077	06/24/2023	12:00	688	687.2	624.143	517.705	0.170536	51.9738	13.8382	38.1356	4.26981	43.0331	34.6631	87.8131	7.6	1	1	0.104156	10波段效果好
94	ZY1F_AHSI_W104.83_N41.92_20230930_009233_L1A0000549577	Laramie River_20230930	Laramie River		42.1103	-104.883	1393	ZY1F	20230930	2023-09-30 18:16:43	2023-09-30 18:16:43	WY	MST	2023-09-30 11:16:43	6204	09/30/2023	11:16	798.9	661.1	691.414	753.9	0.0903748	117.775	12.4743	105.301	4.51662	6.87652	6.53842	7.41021	3.4	-1	1	0.0519437	有羽流
95	ZY1F_AHSI_W107.55_N40.59_20231020_009525_L1A0000564874	Craig_20231020	Craig		40.4627	-107.591	1939	ZY1F	20231020	2023-10-20 18:26:24	2023-10-20 18:26:24	CO	MST	2023-10-20 11:26:24	6021	10/20/2023	11:26	729.3	742.5	666.799	69.0798	0.896401	17.2756	5.52091	11.7547	7.30734	3.22388	153.096	21.4334	0.42	1	0.5	0.0544688	22有一个羽流 24双羽流0.001
96	ZY1F_AHSI_W110.71_N39.27_20230817_008602_L1A0000512937	Hunter_20230817	Hunter		39.1747	-111.029	1725	ZY1F	20230817	2023-08-17 18:36:51	2023-08-17 18:36:51	UT	MST	2023-08-17 11:36:51	6165	08/17/2023	11:36	654	651.7	592.047	665.394	0.123887	170.834	5.63724	165.197	3.12004	16.8348	122.981	84.4471	2.06	1	0.7	0.0395625
97	ZY1F_AHSI_W110.73_N39.27_20230623_007813_L1A0000468861	Hunter_20230623	Hunter		39.1747	-111.029	1725	ZY1F	20230623	2023-06-23 18:36:03	2023-06-23 18:36:03	UT	MST	2023-06-23 11:36:03	6165	06/23/2023	11:36	422.6	419.8	381.852	460.912	0.207042	50.9106	11.9518	38.9587	3.52327	3.8024	173.781	358.569	6.19	-1	0.7	0.0267812	有点不像
98	ZY1F_AHSI_W111.15_N39.27_20230719_008186_L1A0000490264	Hunter_20230719	Hunter		39.1747	-111.029	1725	ZY1F	20230719	2023-07-19 18:38:10	2023-07-19 18:38:10	UT	MST	2023-07-19 11:38:10	6165	07/19/2023	11:38	656.412	749.552	649.001	250.219	0.614455	45.0208	2.43349	42.5873	3.14717	19.5472	62.0923	10.3487	0.5	1	-1	0.0084	清晰完美
99	ZY1F_AHSI_W80.08_N39.27_20220621_002553_L1A0000190867	Harrison Power Station_20220621	Harrison Power Station		39.3844	-80.3325	299	ZY1F	20220621	2022-06-21 16:24:44	2022-06-21 16:24:44	WV	EST	2022-06-21 11:24:44	3944	06/21/2022	11:24	1900.6	2008.4	1763.31	1456.39	0.174062	325.981	17.2571	308.724	7.43318	13.696	23.6837	18.3943	2.33	1	1	0.0581187	非常清晰
100	ZY1F_AHSI_W80.61_N39.27_20230418_006865_L1A0000414746	Harrison Power Station_20230418	Harrison Power Station		39.3844	-80.3325	299	ZY1F	20230418	2023-04-18 16:34:27	2023-04-18 16:34:27	WV	EST	2023-04-18 11:34:27	3944	04/18/2023	11:34	631.6	618	565.987	633.83	0.119868	74.0239	17.3734	56.6504	4.64832	5.36263	169.022	322.831	5.73	1	0.7	0.0325312
101	ZY1F_AHSI_W86.57_N36.17_20230305_006234_L1A0000379047	Gallatin_20230305	Gallatin		36.3156	-86.4006	140	ZY1F	20230305	2023-03-05 16:54:32	2023-03-05 16:54:32	TN	CST	2023-03-05 10:54:32	3403	03/05/2023	10:54	278.3	276	250.592	344.679	0.375462	82.7717	15.6631	67.1086	6.23578	3.33891	134.49	112.075	2.5	-1	0	0.0280437	无排放
102	ZY1F_AHSI_W88.63_N37.05_20231031_009677_L1A0000574307	Shawnee_20231031	Shawnee		37.1517	-88.775	105	ZY1F	20231031	2023-10-31 17:07:20	2023-10-31 17:07:20	KY	CST	2023-10-31 11:07:20	1379	10/31/2023	11:07	879.1	888.799	798.533	621.003	0.22232	110.241	28.1833	82.0574	9.07848	3.58656	99.2852	119.142	3.6	1	0.5	0.0618688	羽流飘到了水面上，水汽干扰大
103	ZY1F_AHSI_W90.79_N38.83_20230704_007970_L1A0000476992	Labadie_20230704	Labadie		38.5583	-90.8361	146	ZY1F	20230704	2023-07-04 17:16:01	2023-07-04 17:16:01	MO	CST	2023-07-04 11:16:01	2103	07/04/2023	11:16	2560.7	2558.1	2322.4	2565.41	0.104638	544.568	22.7161	521.852	9.34277	17.3861	113.598	91.2567	2.41	1	0.7	0.0119125	构成羽流，有排放
104	ZY1F_AHSI_W90.93_N38.38_20231022_009549_L1A0000565683	Labadie_20231022	Labadie		38.5583	-90.8361	146	ZY1F	20231022	2023-10-22 17:17:43	2023-10-22 17:17:43	MO	CST	2023-10-22 11:17:43	2103	10/22/2023	11:17	2197.7	2194	1992.77	1943.97	0.0244886	553.822	22.5003	531.322	11.0771	6.39549	115.43	73.8755	1.92	-1	0.7	0.052475	受江水影响较大
105	ZY1F_AHSI_W93.93_N45.45_20220721_002978_L1A0000173921	Sherburne County_20220721	Sherburne County		45.3792	-93.8958	292	ZY1F	20220721	2022-07-21 17:27:56	2022-07-21 17:27:56	MN	CST	2022-07-21 11:27:56	6090	07/21/2022	11:27	2400.9	2419.9	2185.82	2201.01	0.00694918	221.988	29.4339	192.554	7.76566	12.2905	3.09046	6.07791	5.9	1	1	0.0379	适合作为反演案例
106	ZY1F_AHSI_W94.55_N32.17_20231210_010251_L1A0000608285	Martin Lake_20231210	Martin Lake		32.2597	-94.5703	98	ZY1F	20231210	2023-12-10 17:27:08	2023-12-10 17:27:08	TX	CST	2023-12-10 11:27:08	6146	12/10/2023	11:27	1027.6	1026.4	931.733	974.162	0.0455379	130.239	30.1913	100.048	8.84638	8.15663	176.117	281.2	4.79	-1	0.7	0.0413562	有羽流
107	ZY1F_AHSI_W94.55_N38.38_20220920_003853_L1A0000229994	La Cygne_20220920	La Cygne		38.3472	-94.6467	263	ZY1F	20220920	2022-09-20 17:24:31	2022-09-20 17:24:31	KS	CST	2022-09-20 11:24:31	1241	09/20/2022	11:24	759.1	765.6	691.003	784.609	0.135465	100.213	22.4911	77.7223	6.3375	5.14755	151.9	253.673	5.01	-1	0.7	0.0315812	水汽影响太大了
108	ZY1F_AHSI_W94.56_N38.38_20230816_008587_L1A0000512042	La Cygne_20230816	La Cygne		38.3472	-94.6467	263	ZY1F	20230816	2023-08-16 17:31:23	2023-08-16 17:31:23	KS	CST	2023-08-16 11:31:23	1241	08/16/2023	11:31	1273.7	1441.1	1233.94	996.412	0.192498	187.641	17.1967	170.444	6.75327	14.2979	136.329	127.241	2.8	1	0.7	0.048675	飘到湖面上了
109	ZY1F_AHSI_W94.57_N32.17_20220802_003150_L1A0000184740	Martin Lake_20220802	Martin Lake		32.2597	-94.5703	98	ZY1F	20220802	2022-08-02 17:17:29	2022-08-02 17:17:29	TX	CST	2022-08-02 11:17:29	6146	08/02/2022	11:17	2263.6	2623.6	2146.04	2257.86	0.0521058	343.054	26.7685	316.285	9.26071	9.25727	129.117	145.902	3.39	-1	0.7	0.0468688	有排放，圆形，堆叠状，飘到湖面上
110	ZY1F_AHSI_W94.58_N38.38_20230108_005431_L1A0000329362	La Cygne_20230108	La Cygne		38.3472	-94.6467	263	ZY1F	20230108	2023-01-08 17:27:27	2023-01-08 17:27:27	KS	CST	2023-01-08 11:27:27	1241	01/08/2023	11:27	1406.5	1398.2	1272.57	850.412	0.331735	153.773	8.80788	144.965	8.45771	5.40091	27.1128	10.8451	1.2	-1	0.7	0.0195563	噪声较大
111	ZY1F_AHSI_W94.61_N32.17_20221120_004728_L1A0000290523	Martin Lake_20221120	Martin Lake		32.2597	-94.5703	98	ZY1F	20221120	2022-11-20 17:20:45	2022-11-20 17:20:45	TX	CST	2022-11-20 11:20:45	6146	11/20/2022	11:20	2635.2	2664.4	2399.44	2374.8	0.0102719	413.203	32.1468	381.056	11.8472	7.65611	149.85	148.351	2.97	-1	0.7	0.0447875	有一点羽流比较稀疏
112	ZY1F_AHSI_W96.64_N31.29_20220727_003064_L1A0000178119	Oak Grove_20220727	Oak Grove		31.185	-96.4853	129	ZY1F	20220727	2022-07-27 17:24:51	2022-07-27 17:24:51	TX	CST	2022-07-27 11:24:51	6180	07/27/2022	11:24	1241	1493.7	1217.51	1534.33	0.260217	209.189	16.0275	193.161	4.95609	10.9533	0.332571	0.420148	3.79	-1	1	0.0293937
113	ZY1F_AHSI_W96.65_N31.29_20230304_006220_L1A0000378222	Oak Grove_20230304	Oak Grove		31.185	-96.4853	129	ZY1F	20230304	2023-03-04 17:30:35	2023-03-04 17:30:35	TX	CST	2023-03-04 11:30:35	6180	03/04/2023	11:30	650.4	654.3	591.802	643.772	0.0878161	97.5626	16.7142	80.8484	5.38006	7.77589	35.0182	44.3564	3.8	-1	1	0.0306125	被云挡住了
114	ZY1F_AHSI_W96.65_N31.29_20230816_008587_L1A0000512058	Oak Grove_20230816	Oak Grove		31.185	-96.4853	129	ZY1F	20230816	2023-08-16 17:33:23	2023-08-16 17:33:23	TX	CST	2023-08-16 11:33:23	6180	08/16/2023	11:33	1820.5	1806.6	1644.59	2230.02	0.355967	428.522	13.7774	414.745	5.03732	20.9655	2.06154	1.78667	2.6	1	1	0.026525	羽流很好，简直完美！！！适合作为案例
115	ZY1F_AHSI_W96.67_N31.29_20230108_005431_L1A0000329378	Oak Grove_20230108	Oak Grove		31.185	-96.4853	129	ZY1F	20230108	2023-01-08 17:29:27	2023-01-08 17:29:27	TX	CST	2023-01-08 11:29:27	6180	01/08/2023	11:29	1957.3	1974.5	1783.17	1568.79	0.120227	193.186	20.2496	172.937	5.94614	8.67992	5.59282	8.20281	4.4	1	1	0.0279063	有羽流，水池下方有一个点源
116	ZY1F_AHSI_W97.01_N29.95_20230304_006220_L1A0000378225	Sam Seymour_20230304	Sam Seymour		29.9172	-96.7506	115	ZY1F	20230304	2023-03-04 17:30:57	2023-03-04 17:30:57	TX	CST	2023-03-04 11:30:57	6179	03/04/2023	11:30	672.8	881.2	704.883	1419.72	1.01413	241.328	16.7366	224.592	5.93329	8.57796	12.9646	13.0079	3.01	1	1	0.0879875
117	ZY1F_AHSI_W97.01_N29.95_20230816_008587_L1A0000512061	Sam Seymour_20230816	Sam Seymour		29.9172	-96.7506	115	ZY1F	20230816	2023-08-16 17:33:45	2023-08-16 17:33:45	TX	CST	2023-08-16 11:33:45	6179	08/16/2023	11:33	1354.8	1363.7	1233.49	1355.44	0.0988656	292.053	10.6676	281.385	4.19236	10.9167	6.37748	5.03821	2.37	1	1	0.0804062
118	ZY1F_AHSI_W98.47_N29.51_20221013_004183_L1A0000250381	J K Spruce_20221013	J K Spruce		29.3091	-98.3205	149	ZY1F	20221013	2022-10-13 17:33:02	2022-10-13 17:33:02	TX	CST	2022-10-13 11:33:02	7097	10/13/2022	11:33	1492.3	1495.9	1355.59	1826.62	0.347471	181.629	18.9967	162.632	4.82342	7.90814	81.8923	157.233	5.76	-1	0.7	0.0246375	噪声较大

## Sheet: 排放设施信息
State	Facility Name	Facility ID	Longitude	Latitude	Altitude	Zone	检索表达式	Google检索表达式
ND	Antelope Valley	6469	-101.834	47.3714	590	CST	POINT(-101.8344 47.3714)	47.3714,-101.8344
CO	Craig	6021	-107.591	40.4627	1939	MST	POINT(-107.5912 40.4627)	40.4627,-107.5912
NM	Four Corners Steam Elec Station	2442	-108.481	36.69	1630	MST	POINT(-108.4814 36.69)	36.69,-108.4814
TN	Gallatin	3403	-86.4006	36.3156	140	CST	POINT(-86.4006 36.3156)	36.3156,-86.4006
NE	Gerald Gentleman Station	6077	-101.141	41.0808	948	CST	POINT(-101.1408 41.0808)	41.0808,-101.1408
TX	Harrington Station	6193	-101.748	35.2972	1090	CST	POINT(-101.7475 35.2972)	35.2972,-101.7475
WV	Harrison Power Station	3944	-80.3325	39.3844	299	EST	POINT(-80.3325 39.3844)	39.3844,-80.3325
UT	Hunter	6165	-111.029	39.1747	1725	MST	POINT(-111.0289 39.1747)	39.1747,-111.0289
TX	J K Spruce	7097	-98.3205	29.3091	149	CST	POINT(-98.3205 29.3091)	29.3091,-98.3205
WY	Jim Bridger	8066	-108.787	41.7378	2044	MST	POINT(-108.7875 41.7378)	41.7378,-108.7875
KS	La Cygne	1241	-94.6467	38.3472	263	CST	POINT(-94.6467059 38.347189)	38.347189,-94.6467059
MO	Labadie	2103	-90.8361	38.5583	146	CST	POINT(-90.8361 38.5583)	38.5583,-90.8361
WY	Laramie River	6204	-104.883	42.1103	1393	MST	POINT(-104.8828 42.1103)	42.1103,-104.8828
TX	Martin Lake	6146	-94.5703	32.2597	98	CST	POINT(-94.5703 32.2597)	32.2597,-94.5703
TX	Oak Grove	6180	-96.4853	31.185	129	CST	POINT(-96.4853 31.185)	31.185,-96.4853
TX	Sam Seymour	6179	-96.7506	29.9172	115	CST	POINT(-96.7506 29.9172)	29.9172,-96.7506
KY	Shawnee	1379	-88.775	37.1517	105	CST	POINT(-88.775 37.1517)	37.1517,-88.775
MN	Sherburne County	6090	-93.8958	45.3792	292	CST	POINT(-93.8958 45.3792)	45.3792,-93.8958
KY	Trimble County	6071	-85.4117	38.5847	144	EST	POINT(-85.4117 38.5847)	38.5847,-85.4117
AR	White Bluff	6009	-92.1392	34.4236	93	CST	POINT(-92.1392 34.4236)	34.4236,-92.1392

## Sheet: 2024.12
id	filename	foldername	facility	type	Latitude	Longitude	satellite	date	Time of Satellite	UTC	State	Zone	Local Standard Time	Facility ID	day LST	time	前整点Q	后整点Q	avg Q(ton/h)	反演结果	反演误差	不确定度	IME_u (t/h)	Wind_u (t/h)	MF_u (ppm)	q	diff_dir	phi	风速	提取	排放	背景	备注
1	GF5_AHSI_W107.84_N40.19_20190803_006569_L10000052859	Craig_20190802	Craig		40.4627	-107.591	GF5	20190803	2019-08-03 04:08:09	2019-08-02 20:08:09	CO	MST	2019-08-02 13:08:09	6021	08/02/2019	13:08	1356.3	1381	1233.4	1275.64	0.0342429	210.752	24.9369	185.815	10.4771	8.68304	0.340904	0.370449	3.26	1	1	0.0714101
2	GF5_AHSI_W111.09_N39.21_20191118_008126_L10000065664	Hunter_20191118	Hunter		39.1747	-111.029	GF5	20191118	2019-11-18 04:20:29	2019-11-17 20:20:29	UT	MST	2019-11-17 13:20:29	6165	11/17/2019	13:20	889	885.7	805.489	365.216	0.546591	202.639	8.34009	194.299	11.5013	4.29928	167.712	50.8727	0.91	-1	0.5	0.0354438
3	GF5_AHSI_W85.14_N38.72_20191225_008664_L10000068784	Trimble County_20191225	Trimble County		38.5847	-85.4117	GF5	20191225	2019-12-25 02:36:43	2019-12-24 18:36:43	KY	EST	2019-12-24 13:36:43	6071	12/24/2019	13:36	1037.4	1080.8	964.737	926.386	0.0397523	455.367	13.5155	441.851	13.6034	6.05125	71.5397	25.2774	1.06	1	1	0.0337625
4	GF5A_AHSI_W108.6_N36.7_20231227_005597_L10000078715	Four Corners Steam Elec Station_20231227	Four Corners Steam Elec Station		36.69	-108.481	GF5A	20231227	2023-12-27 20:12:59	2023-12-27 20:12:59	NM	MST	2023-12-27 13:12:59	2442	12/27/2023	13:12	797	796.8	722.99	705.125	0.0247092	100.667	22.6333	78.0333	7.77355	3.36382	137.343	200.52	4.38	-1	0.7	0.0563688
5	GF5A_AHSI_W108.7_N41.7_20231213_005393_L10000074107	Jim Bridger_20231213	Jim Bridger		41.7378	-108.787	GF5A	20231213	2023-12-13 20:08:54	2023-12-13 20:08:54	WY	MST	2023-12-13 13:08:54	8066	12/13/2023	13:08	1825.9	1677	1638.42	1035.07	0.368251	162.663	38.6206	124.042	15.3235	4.13556	75.8957	101.194	4	1	1	0.038825
6	GF5A_AHSI_W108.8_N41.7_20230923_004213_L10000054221	Jim Bridger_20230923	Jim Bridger		41.7378	-108.787	GF5A	20230923	2023-09-23 20:11:46	2023-09-23 20:11:46	WY	MST	2023-09-23 13:11:46	8066	09/23/2023	13:11	460.9	452.2	416.674	297.889	0.285079	32.3516	0	0	0	0	0	0	7.1	-1	0	0.0350562
7	GF5A_AHSI_W94.3_N32.3_20230908_003994_L10000051261	Martin Lake_20230908	Martin Lake		32.2597	-94.5703	GF5A	20230908	2023-09-08 19:22:37	2023-09-08 19:22:37	TX	CST	2023-09-08 13:22:37	6146	09/08/2023	13:22	2712.1	2709.3	2459.44	2593.78	0.0546195	374.401	20.278	354.123	6.63984	11.4244	20.9875	24.3455	3.48	1	1	0.0512125	有羽流、但周围水汽干扰也很大
8	GF5A_AHSI_W98.5_N29.3_20230814_003630_L10000044804	J K Spruce_20230814	J K Spruce		29.3091	-98.3205	GF5A	20230814	2023-08-14 19:42:15	2023-08-14 19:42:15	TX	CST	2023-08-14 13:42:15	7097	08/14/2023	13:42	1389.2	1408.7	1272.64	1105.93	0.130996	370.207	9.22849	360.978	4.9311	11.3693	20.1245	11.4039	1.7	1	1	0.0232187	完美
9	GF5B_AHSI_W100.9_N41.2_20220628_004292_L10000156032	Gerald Gentleman Station_20220628	Gerald Gentleman Station		41.0808	-101.141	GF5B	20220628	2022-06-29 01:41:40	2022-06-28 17:41:40	NE	CST	2022-06-28 11:41:40	6077	06/28/2022	11:41	1314.5	1320.1	1195.97	300.691	0.748579	84.7438	7.05849	77.6854	3.86634	16.9299	34.0683	22.7122	2	1	0.5	0.0267562	24波段可见排放，有排放，但是算不准，靠近湖边
10	GF5B_AHSI_W101.1_N41.2_20211220_001524_L10000044164	Gerald Gentleman Station_20211220	Gerald Gentleman Station		41.0808	-101.141	GF5B	20211220	2021-12-21 01:37:21	2021-12-20 17:37:21	NE	CST	2021-12-20 11:37:21	6077	12/20/2021	11:37	1201.3	1283	1135.51	1002.09	0.117494	136.824	19.8608	116.963	7.09825	4.20738	1.41633	1.94509	4.12	1	1	0.0156687
11	GF5B_AHSI_W101.6_N47.5_20220619_004161_L10000151101	Antelope Valley_20220619	Antelope Valley		47.371	-101.836	GF5B	20220619	2022-06-20 01:51:31	2022-06-19 17:51:31	ND	CST	2022-06-19 11:51:31	6469	06/19/2022	11:51	522.7	565.6	507.266	652.096	0.28551	91.0587	20.9246	70.1341	6.47374	7.75621	67.4867	101.905	4.53	-1	1	0.0848688
12	GF5B_AHSI_W101.9_N35.3_20220424_003345_L10000118254	Harrington Station_20220424	Harrington Station		35.2972	-101.748	GF5B	20220424	2022-04-25 01:38:35	2022-04-24 17:38:35	TX	CST	2022-04-24 11:38:35	6193	04/24/2022	11:38	296.2	292.8	266.755	97.287	0.635294	20.0235	12.2075	7.81592	3.19868	2.69457	107.058	237.669	6.66	-1	0	0.0456625
13	GF5B_AHSI_W102.0_N47.5_20220316_002777_L10000118963	Antelope Valley_20220316	Antelope Valley		47.371	-101.836	GF5B	20220316	2022-03-17 01:50:55	2022-03-16 17:50:55	ND	CST	2022-03-16 11:50:55	6469	03/16/2022	11:50	560.6	524.1	480.974	1073.45	1.23183	110.344	39.792	70.552	10.0877	9.33737	7.25622	22.204	9.18	-1	0	0.0401063
14	GF5B_AHSI_W102.1_N47.5_20220626_004263_L10000154923	Antelope Valley_20220626	Antelope Valley		47.371	-101.836	GF5B	20220626	2022-06-27 01:53:27	2022-06-26 17:53:27	ND	CST	2022-06-26 11:53:27	6469	06/26/2022	11:53	667	827.8	733.949	751.323	0.0236718	95.3512	34.554	60.7972	8.83823	3.51938	59.1577	129.95	6.59	1	1	0.0697312	能看见一点
15	GF5B_AHSI_W107.5_N40.2_20230926_010921_L10000396892	Craig_20230926	Craig		40.4627	-107.591	GF5B	20230926	2023-09-27 02:12:39	2023-09-26 18:12:39	CO	MST	2023-09-26 11:12:39	6021	09/26/2023	11:12	761.2	909.1	717.384	642.879	0.103856	306.697	7.87469	298.822	8.00757	6.92691	16.2364	5.95333	1.1	-1	0.7	0.0507563
16	GF5B_AHSI_W107.8_N40.7_20221018_005924_L10000222668	Craig_20221018	Craig		40.4627	-107.591	GF5B	20221018	2022-10-19 02:11:02	2022-10-18 18:11:02	CO	MST	2022-10-18 11:11:02	6021	10/18/2022	11:11	830.6	831.6	753.674	772.348	0.0247779	277.7	8.67347	269.027	6.31122	6.12691	17.7787	9.65977	1.63	1	1	0.0539313	两个源
17	GF5B_AHSI_W108.2_N36.7_20220610_004030_L10000145798	Four Corners Steam Elec Station_20220610	Four Corners Steam Elec Station		36.69	-108.481	GF5B	20220610	2022-06-11 02:06:07	2022-06-10 18:06:07	NM	MST	2022-06-10 11:06:07	2442	06/10/2022	11:06	1471.5	1052.86	1296.94	1013.26	0.218734	172.111	9.52519	162.586	4.03232	12.6047	1.46785	1.45317	2.97	1	1	0.070375	完美
18	GF5B_AHSI_W108.3_N36.7_20220420_003287_L10000117219	Four Corners Steam Elec Station_20220420	Four Corners Steam Elec Station		36.69	-108.481	GF5B	20220420	2022-04-21 02:05:10	2022-04-20 18:05:10	NM	MST	2022-04-20 11:05:10	2442	04/20/2022	11:05	539.3	621.1	495.429	232.696	0.530313	56.6233	6.4982	50.1251	3.34818	3.89354	126.118	96.6902	2.3	-1	0.7	0.0579875	有排放
19	GF5B_AHSI_W108.3_N36.7_20240106_012407_L10000448627	Four Corners Steam Elec Station_20240106	Four Corners Steam Elec Station		36.69	-108.481	GF5B	20240106	2024-01-07 02:12:33	2024-01-06 18:12:33	NM	MST	2024-01-06 11:12:33	2442	01/06/2024	11:12	1357.4	1191	1201.22	622.694	0.481616	275.633	19.5927	256.04	17.8938	6.63405	4.05297	1.78331	1.32	1	1	0.0705687
20	GF5B_AHSI_W108.8_N41.7_20220212_002311_L10000077220	Jim Bridger_20220212	Jim Bridger		41.7378	-108.787	GF5B	20220212	2022-02-13 02:10:06	2022-02-12 18:10:06	WY	MST	2022-02-12 11:10:06	8066	02/12/2022	11:10	580.1	545	520.951	699.748	0.343213	91.2137	15.3905	75.8232	5.48563	5.46019	53.5068	80.0819	4.49	1	1	0.03575	有排放，但周围噪声明显更大，不适合反演
21	GF5B_AHSI_W109.0_N41.6_20231031_011431_L10000413197	Jim Bridger_20231031	Jim Bridger		41.7378	-108.787	GF5B	20231031	2023-11-01 02:20:04	2023-10-31 18:20:04	WY	MST	2023-10-31 11:20:04	8066	10/31/2023	11:20	1208.8	1174.8	1086.32	1144	0.0530966	116.315	17.5595	98.7552	5.41513	6.18243	40.5408	81.2168	6.01	-1	1	0.0392938
22	GF5B_AHSI_W109.1_N41.6_20231221_012174_L10000440228	Jim Bridger_20231221	Jim Bridger		41.7378	-108.787	GF5B	20231221	2023-12-22 02:20:37	2023-12-21 18:20:37	WY	MST	2023-12-21 11:20:37	8066	12/21/2023	11:20	994.7	868	864.063	749.324	0.13279	139.266	27.3206	111.945	12.3466	4.14199	111.095	117.761	3.18	1	0.7	0.0367
23	GF5B_AHSI_W110.9_N39.2_20220418_003258_L10000114473	Hunter_20220418	Hunter		39.1747	-111.029	GF5B	20220418	2022-04-19 02:17:59	2022-04-18 18:17:59	UT	MST	2022-04-18 11:17:59	6165	04/18/2022	11:17	909.6	899.7	822.631	133.406	0.83783	100.062	2.27514	97.7865	4.2188	9.42285	10.4024	2.08048	0.6	1	-1	0.0220063	低风速
24	GF5B_AHSI_W110.9_N39.2_20240104_012378_L10000447404	Hunter_20240104	Hunter		39.1747	-111.029	GF5B	20240104	2024-01-05 02:25:25	2024-01-04 18:25:25	UT	MST	2024-01-04 11:25:25	6165	01/04/2024	11:25	353.2	352.6	320.191	267.579	0.164312	202.337	6.20152	196.136	11.9889	5.13519	145.343	29.0687	0.6	1	0.7	0.0627875
25	GF5B_AHSI_W80.4_N39.2_20231012_011153_L10000404427	Harrison Power Station_20231012	Harrison Power Station		39.3844	-80.3325	GF5B	20231012	2023-10-13 00:23:33	2023-10-12 16:23:33	WV	EST	2023-10-12 11:23:33	3944	10/12/2023	11:23	229.9	228.3	208.005	232.887	0.119621	155.776	9.53922	146.237	13.6651	7.0499	83.2661	20.2614	0.73	-1	0.5	0.0490937	伪排放
26	GF5B_AHSI_W85.2_N38.7_20231031_011430_L10000413176	Trimble County_20231031	Trimble County		38.5847	-85.4117	GF5B	20231031	2023-11-01 00:42:01	2023-10-31 16:42:01	KY	EST	2023-10-31 11:42:01	6071	10/31/2023	11:42	278.2	284.99	256.691	1221.28	3.75781	217.741	36.4535	181.287	12.6572	4.60675	14.8945	15.8875	3.2	-1	0.5	0.0450687	探测到了，但算的不准（该案例说明GF5的探测下限达到256t/h, 3m/s）
27	GF5B_AHSI_W85.3_N38.7_20230714_009842_L10000360353	Trimble County_20230714	Trimble County		38.5847	-85.4117	GF5B	20230714	2023-07-15 00:42:09	2023-07-14 16:42:09	KY	EST	2023-07-14 11:42:09	6071	07/14/2023	11:42	1373.5	1399.05	1262.24	1355.58	0.0739414	546.085	17.5931	528.492	11.1145	8.86538	17.3389	8.78506	1.52	1	1	0.05525
28	GF5B_AHSI_W88.6_N37.1_20231212_012042_L10000435322	Shawnee_20231212	Shawnee		37.1517	-88.775	GF5B	20231212	2023-12-13 00:54:21	2023-12-12 16:54:21	KY	CST	2023-12-12 10:54:21	1379	12/12/2023	10:54	943.299	928	843.255	1183.51	0.403497	382.04	18.433	363.607	10.3499	5.19579	72.1762	42.5839	1.77	1	0.5	0.0495688	羽流飘到了水面上，水汽干扰大
29	GF5B_AHSI_W88.6_N37.2_20220326_002922_L10000100107	Shawnee_20220326	Shawnee		37.1517	-88.775	GF5B	20220326	2022-03-27 00:46:28	2022-03-26 16:46:28	KY	CST	2022-03-26 10:46:28	1379	03/26/2022	10:46	811.401	780.998	714.945	670.614	0.0620056	87.6363	26.7489	60.8874	6.62806	4.42923	174.456	326.233	5.61	-1	0.5	0.042425	羽流飘到了水面上，水汽干扰大
30	GF5B_AHSI_W88.7_N37.2_20230825_010454_L10000380643	Shawnee_20230825	Shawnee		37.1517	-88.775	GF5B	20230825	2023-08-26 00:54:41	2023-08-25 16:54:41	KY	CST	2023-08-25 10:54:41	1379	08/25/2023	10:54	1266.6	1261.2	1144.63	996.715	0.129228	209.449	24.8957	184.553	9.9821	5.79251	11.7856	10.2535	2.61	1	1	0.0576313	有排放，圆形，无羽流形状
31	GF5B_AHSI_W92.2_N34.3_20231006_011066_L10000401605	White Bluff_20231006	White Bluff		34.4236	-92.1392	GF5B	20231006	2023-10-07 01:05:59	2023-10-06 17:05:59	AR	CST	2023-10-06 11:05:59	6009	10/06/2023	11:05	320	380.1	294.843	645.46	1.18917	145.308	34.8975	110.411	15.1686	5.09483	60.6134	56.5725	2.8	-1	0.5	0.0541563
32	GF5B_AHSI_W94.2_N45.6_20220602_003913_L10000141558	Sherburne County_20220602	Sherburne County		45.3792	-93.8958	GF5B	20220602	2022-06-03 01:19:01	2022-06-02 17:19:01	MN	CST	2022-06-02 11:19:01	6090	06/02/2022	11:19	411.9	411.2	373.468	630.636	0.688593	88.0789	23.6395	64.4394	6.84508	4.11651	13.259	21.3029	4.82	-1	0.7	0.0176625
33	GF5B_AHSI_W94.3_N32.3_20231103_011474_L10000414550	Martin Lake_20231103	Martin Lake		32.2597	-94.5703	GF5B	20231103	2023-11-04 01:12:54	2023-11-03 17:12:54	TX	CST	2023-11-03 11:12:54	6146	11/03/2023	11:12	1488.1	1487.9	1349.95	1692.31	0.253615	384.042	27.1952	356.847	12.3174	6.03126	43.4873	33.9201	2.34	-1	1	0.0430938	有羽流，水面噪声大
34	GF5B_AHSI_W94.5_N32.3_20220407_003097_L10000107611	Martin Lake_20220407	Martin Lake		32.2597	-94.5703	GF5B	20220407	2022-04-08 01:05:50	2022-04-07 17:05:50	TX	CST	2022-04-07 11:05:50	6146	04/07/2022	11:05	1469.4	1514	1336.39	674.393	0.495362	84.5231	27.3232	57.1999	7.10346	7.37089	36.4565	74.8574	6.16	1	0.5	0.0477
35	GF5B_AHSI_W94.5_N38.2_20221019_005938_L10000223276	La Cygne_20221019	La Cygne		38.3472	-94.6467	GF5B	20221019	2022-10-20 01:15:33	2022-10-19 17:15:33	KS	CST	2022-10-19 11:15:33	1241	10/19/2022	11:15	708.8	713.2	644.01	553.267	0.140904	117.502	14.6037	102.898	5.71005	6.1263	157.345	136.365	2.6	-1	0.7	0.0564438	32波段可见排放源
36	GF5B_AHSI_W96.5_N31.3_20221019_005938_L10000223290	Oak Grove_20221019	Oak Grove		31.185	-96.4853	GF5B	20221019	2022-10-20 01:17:28	2022-10-19 17:17:28	TX	CST	2022-10-19 11:17:28	6180	10/19/2022	11:17	1788.5	1803.2	1626.28	1548.93	0.0475589	595.197	10.4166	584.781	5.94808	19.165	2.96656	1.53272	1.55	1	1	0.0295312	有排放
37	GF5B_AHSI_W96.9_N29.8_20221019_005938_L10000223293	Sam Seymour_20221019	Sam Seymour		29.9172	-96.7506	GF5B	20221019	2022-10-20 01:17:53	2022-10-19 17:17:53	TX	CST	2022-10-19 11:17:53	6179	10/19/2022	11:17	964.3	979	878.577	1357.17	0.544734	261.618	10.3222	251.295	3.82084	6.73796	164.311	142.95	2.61	-1	0.7	0.0195875
38	ZY1E_AHSI_W101.24_N41.04_20230805_020428_L1A0000637084	Gerald Gentleman Station_20230805	Gerald Gentleman Station		41.0808	-101.141	ZY1E	20230805	2023-08-05 17:48:20	2023-08-05 17:48:20	NE	CST	2023-08-05 11:48:20	6077	08/05/2023	11:48	1358.5	1357.1	1231.39	1533.82	0.245599	165.676	33.4284	132.248	9.35563	5.6644	63.7204	127.866	6.02	-1	0.7	0.0280313
39	ZY1E_AHSI_W101.46_N35.28_20220305_012995_L1A0000414997	Harrington Station_20220305	Harrington Station		35.2972	-101.748	ZY1E	20220305	2022-03-05 17:52:24	2022-03-05 17:52:24	TX	CST	2022-03-05 11:52:24	6193	03/05/2022	11:52	167.2	177.3	159.622	808.979	4.06808	64.1378	15.4267	48.711	3.82618	4.98163	122.391	438.975	10.76	1	0	0.0384688	排放强度太低了，无法检测到
40	ZY1E_AHSI_W101.95_N35.28_20220331_013368_L1A0000427095	Harrington Station_20220331	Harrington Station		35.2972	-101.748	ZY1E	20220331	2022-03-31 17:54:08	2022-03-31 17:54:08	TX	CST	2022-03-31 11:54:08	6193	03/31/2022	11:54	641.9	638.7	579.709	604.156	0.04217	67.0406	9.60362	57.437	2.82949	7.31441	11.7654	20.7071	5.28	1	1	0.0459125
41	ZY1E_AHSI_W101.95_N47.64_20201123_006296_L1A0000193277	Antelope Valley_20201123	Antelope Valley		47.371	-101.836	ZY1E	20201123	2020-11-23 18:05:58	2020-11-23 18:05:58	ND	CST	2020-11-23 12:05:58	6469	11/23/2020	12:05	372.7	365.9	337.594	1748.72	4.17996	179.491	35.722	143.769	11.4914	8.68897	58.6143	125.825	6.44	1	0	0.0526625	这一景还是不太好反演
42	ZY1E_AHSI_W104.76_N41.92_20230917_021045_L1A0000655064	Laramie River_20230917	Laramie River		42.1103	-104.883	ZY1E	20230917	2023-09-17 18:02:08	2023-09-17 18:02:08	WY	MST	2023-09-17 11:02:08	6204	09/17/2023	11:02	1667.1	1881.6	1518.85	1523.98	0.00337354	140.169	29.6413	110.527	7.28854	4.1852	4.46415	11.5919	7.79	-1	0.7	0.0414187	羽流良好
43	ZY1E_AHSI_W104.93_N41.92_20230625_019840_L1A0000620580	Laramie River_20230625	Laramie River		42.1103	-104.883	ZY1E	20230625	2023-06-25 18:05:08	2023-06-25 18:05:08	WY	MST	2023-06-25 11:05:08	6204	06/25/2023	11:05	1043.4	1114.7	951.947	1041.59	0.0941639	217.738	16.8381	200.9	7.75722	12.8194	131.408	110.382	2.52	1	0.7	0.0652313	有排放
44	ZY1E_AHSI_W105.13_N42.36_20200825_005004_L1A0000136593	Laramie River_20200825	Laramie River		42.1103	-104.883	ZY1E	20200825	2020-08-25 18:10:51	2020-08-25 18:10:51	WY	MST	2020-08-25 11:10:51	6204	08/25/2020	11:10	520.3	520.5	472.038	515.95	0.0930255	88.3104	9.96162	78.3488	4.06271	7.91735	166.503	173.718	3.13	1	0.7	0.036375
45	ZY1E_AHSI_W107.47_N40.60_20231007_021332_L1A0000663395	Craig_20231007	Craig		40.4627	-107.591	ZY1E	20231007	2023-10-07 18:11:00	2023-10-07 18:11:00	CO	MST	2023-10-07 11:11:00	6021	10/07/2023	11:11	487.2	518.1	447.12	656.686	0.468704	274.214	9.37652	264.838	7.84729	3.96794	3.73454	1.69299	1.36	1	0.7	0.05565	有排放 不像羽流
46	ZY1E_AHSI_W107.63_N40.60_20230715_020127_L1A0000628485	Craig_20230715	Craig		40.4627	-107.591	ZY1E	20230715	2023-07-15 18:14:00	2023-07-15 18:14:00	CO	MST	2023-07-15 11:14:00	6021	07/15/2023	11:14	892.4	903.4	811.9	952.417	0.173071	174.639	12.36	162.279	5.52491	7.30098	174.366	163.323	2.81	-1	0.7	0.0320312	19波段较好
47	ZY1E_AHSI_W108.64_N36.61_20200917_005334_L1A0000154763	Four Corners Steam Elec Station_20200917	Four Corners Steam Elec Station		36.69	-108.481	ZY1E	20200917	2020-09-17 18:19:28	2020-09-17 18:19:28	NM	MST	2020-09-17 11:19:28	2442	09/17/2020	11:19	1507.6	1506	1367.21	858.119	0.372359	159.517	7.28369	152.233	3.28294	7.93946	47.2646	42.6957	2.71	1	1	0.0735313	羽流形状好
48	ZY1E_AHSI_W108.68_N41.92_20200911_005248_L1A0000148906	Jim Bridger_20200911	Jim Bridger		41.7378	-108.787	ZY1E	20200911	2020-09-11 18:24:53	2020-09-11 18:24:53	WY	MST	2020-09-11 11:24:53	8066	09/11/2020	11:24	1437.4	1314.4	1259.35	1352.99	0.0743528	121.187	17.1398	104.047	5.17439	5.89113	64.2902	152.368	7.11	-1	1	0.0567062	排放位置在山上，不像排放源
49	ZY1E_AHSI_W108.72_N36.61_20231007_021332_L1A0000663404	Four Corners Steam Elec Station_20231007	Four Corners Steam Elec Station		36.69	-108.481	ZY1E	20231007	2023-10-07 18:12:07	2023-10-07 18:12:07	NM	MST	2023-10-07 11:12:07	2442	10/07/2023	11:12	1532.3	1509.9	1386.01	875.727	0.368169	292.206	6.36713	285.839	4.06394	10.2258	16.4356	9.3135	1.7	1	1	0.0634563	羽流很完整，可以作为案例
50	ZY1E_AHSI_W108.78_N41.92_20200813_004832_L1A0000126505	Jim Bridger_20200813	Jim Bridger		41.7378	-108.787	ZY1E	20200813	2020-08-13 18:24:46	2020-08-13 18:24:46	WY	MST	2020-08-13 11:24:46	8066	08/13/2020	11:24	1902.1	1640.8	1630.74	647.743	0.602791	69.4326	8.98949	60.4431	2.89292	7.96739	28.5651	51.5124	5.41	-1	0.7	0.03605	羽流形状很好，不过怎么风速有点问题
51	ZY1E_AHSI_W111.21_N39.27_20201004_005578_L1A0000168618	Hunter_20201004	Hunter		39.1747	-111.029	ZY1E	20201004	2020-10-04 18:32:36	2020-10-04 18:32:36	UT	MST	2020-10-04 11:32:36	6165	10/04/2020	11:32	656	681.6	607.499	1002.94	0.650932	247.738	9.48377	238.254	5.22714	6.73968	55.4318	39.3566	2.13	1	1	0.0244812	完美
52	ZY1E_AHSI_W111.31_N39.27_20200905_005163_L1A0000144224	Hunter_20200905	Hunter		39.1747	-111.029	ZY1E	20200905	2020-09-05 18:32:32	2020-09-05 18:32:32	UT	MST	2020-09-05 11:32:32	6165	09/05/2020	11:32	1057.9	1295.6	1074.72	754.513	0.297943	215.837	8.10124	207.736	4.74944	7.61698	66.3399	42.2364	1.91	-1	0.7	0.0119375	有羽流
53	ZY1E_AHSI_W85.49_N38.38_20220327_013308_L1A0000425150	Trimble County_20220327	Trimble County		38.5847	-85.4117	ZY1E	20220327	2022-03-27 16:51:14	2022-03-27 16:51:14	KY	EST	2022-03-27 11:51:14	6071	03/27/2022	11:51	412.9	409.2	371.723	291.05	0.217027	59.6759	21.4202	38.2558	7.03208	3.92785	157.439	189.976	3.62	-1	0	0.0513625
54	ZY1E_AHSI_W86.17_N36.17_20220327_013308_L1A0000425155	Gallatin_20220327	Gallatin		36.3156	-86.4006	ZY1E	20220327	2022-03-27 16:51:51	2022-03-27 16:51:51	TN	CST	2022-03-27 10:51:51	3403	03/27/2022	10:51	307	306.4	278.043	199.182	0.283629	62.3026	23.1514	39.1512	9.62912	2.77519	109.894	90.8454	2.48	1	0	0.0322
55	ZY1E_AHSI_W86.59_N36.17_20221004_016048_L1A0000511602	Gallatin_20221004	Gallatin		36.3156	-86.4006	ZY1E	20221004	2022-10-04 16:51:33	2022-10-04 16:51:33	TN	CST	2022-10-04 10:51:33	3403	10/04/2022	10:51	758.6	764.3	692.586	885.581	0.278659	360.449	21.9899	338.46	13.8425	7.36626	123.453	60.9037	1.48	-1	0.7	0.0306937	像伪排放源
56	ZY1E_AHSI_W88.87_N37.06_20211128_011601_L1A0000371189	Shawnee_20211128	Shawnee		37.1517	-88.775	ZY1E	20211128	2021-11-28 17:03:59	2021-11-28 17:03:59	KY	CST	2021-11-28 11:03:59	1379	11/28/2021	11:03	406.4	406.4	368.68	464.253	0.259232	91.3928	28.5355	62.8573	10.7549	5.24539	172.657	202.009	3.51	-1	0.5	0.0546063	有排放
57	ZY1E_AHSI_W88.95_N37.06_20210119_007111_L1A0000229838	Shawnee_20210119	Shawnee		37.1517	-88.775	ZY1E	20210119	2021-01-19 17:02:53	2021-01-19 17:02:53	KY	CST	2021-01-19 11:02:53	1379	01/19/2021	11:02	868.501	669.401	781.87	834.872	0.0677887	327.041	18.3384	308.703	11.669	4.04656	121.412	63.5387	1.57	1	0.7	0.0230188	右下角伪排放源
58	ZY1E_AHSI_W89.08_N37.06_20201221_006696_L1A0000212411	Shawnee_20201221	Shawnee		37.1517	-88.775	ZY1E	20201221	2020-12-21 17:03:04	2020-12-21 17:03:04	KY	CST	2020-12-21 11:03:04	1379	12/21/2020	11:03	386.9	386.599	350.976	735.794	1.09642	101.225	40.7327	60.4923	12.1805	4.90056	62.4587	134.078	6.44	-1	0	0.0467062
59	ZY1E_AHSI_W90.79_N38.83_20210925_010683_L1A0000340283	Labadie_20210925	Labadie		38.5583	-90.8361	ZY1E	20210925	2021-09-25 17:13:23	2021-09-25 17:13:23	MO	CST	2021-09-25 11:13:23	2103	09/25/2021	11:13	1746.6	1732.6	1581.74	1683.52	0.0643468	306.283	33.1984	273.084	13.0243	6.76405	0.861715	0.844481	2.94	-1	1	0.0480438
60	ZY1E_AHSI_W90.90_N38.38_20220113_012261_L1A0000391512	Labadie_20220113	Labadie		38.5583	-90.8361	ZY1E	20220113	2022-01-13 17:13:19	2022-01-13 17:13:19	MO	CST	2022-01-13 11:13:19	2103	01/13/2022	11:13	1841.4	1849.6	1672.1	1513.31	0.0949654	506.308	25.2596	481.049	15.1399	4.45761	126.707	73.068	1.73	-1	0.7	0.0451375
61	ZY1E_AHSI_W90.98_N38.38_20230329_018573_L1A0000585856	Labadie_20230329	Labadie		38.5583	-90.8361	ZY1E	20230329	2023-03-29 17:07:56	2023-03-29 17:07:56	MO	CST	2023-03-29 11:07:56	2103	03/29/2023	11:07	2464.5	2453.2	2234.56	2043.98	0.0852885	761.121	13.0319	748.09	7.24797	6.80603	4.8803	2.57029	1.58	1	0.7	0.05215	羽流沿着江面规整陈列
62	ZY1E_AHSI_W91.94_N34.40_20220726_015044_L1A0000481359	White Bluff_20220726	White Bluff		34.4236	-92.1392	ZY1E	20220726	2022-07-26 17:12:13	2022-07-26 17:12:13	AR	CST	2022-07-26 11:12:13	6009	07/26/2022	11:12	1389.4	1742.2	1324.45	1075.96	0.187617	192.862	36.1327	156.73	14.0085	6.81422	117.565	127.754	3.26	-1	0.7	0.041225	微弱的排放
63	ZY1E_AHSI_W92.11_N34.40_20220113_012261_L1A0000391521	White Bluff_20220113	White Bluff		34.4236	-92.1392	ZY1E	20220113	2022-01-13 17:14:27	2022-01-13 17:14:27	AR	CST	2022-01-13 11:14:27	6009	01/13/2022	11:14	901.3	897.1	816.757	686.383	0.159624	181.18	31.7069	149.473	16.9114	7.73584	119.967	91.1747	2.28	-1	0.7	0.046875	没有排放
64	ZY1E_AHSI_W92.15_N34.40_20220309_013050_L1A0000416988	White Bluff_20220309	White Bluff		34.4236	-92.1392	ZY1E	20220309	2022-03-09 17:14:19	2022-03-09 17:14:19	AR	CST	2022-03-09 11:14:19	6009	03/09/2022	11:14	280.3	279.1	254.03	961.001	2.78302	188.467	25.9978	162.47	10.2224	6.61507	55.9681	52.7966	2.83	1	0.5	0.0205938	很多云，不适合反演
65	ZY1E_AHSI_W92.33_N34.40_20231104_021729_L1A0000674441	White Bluff_20231104	White Bluff		34.4236	-92.1392	ZY1E	20231104	2023-11-04 17:03:42	2023-11-04 17:03:42	AR	CST	2023-11-04 11:03:42	6009	11/04/2023	11:03	537.3	433.2	482.708	397.288	0.17696	234.637	14.2898	220.347	16.2348	5.26335	103.478	29.6637	0.86	1	0.7	0.0518187
66	ZY1E_AHSI_W93.56_N45.45_20220320_013210_L1A0000421897	Sherburne County_20220320	Sherburne County		45.3792	-93.8958	ZY1E	20220320	2022-03-20 17:31:14	2022-03-20 17:31:14	MN	CST	2022-03-20 11:31:14	6090	03/20/2022	11:31	1451.2	1311.2	1250.89	1302.53	0.0412848	385.911	27.293	358.618	14.667	5.73645	7.7909	4.9602	1.91	-1	0.7	0.0484
67	ZY1E_AHSI_W94.02_N45.45_20220927_015948_L1A0000508557	Sherburne County_20220927	Sherburne County		45.3792	-93.8958	ZY1E	20220927	2022-09-27 17:31:08	2022-09-27 17:31:08	MN	CST	2022-09-27 11:31:08	6090	09/27/2022	11:31	1052.9	1052.9	955.175	1406.01	0.471991	247.93	48.0476	199.883	18.0897	4.91084	29.3764	32.7058	3.34	-1	1	0.0461375	有羽流
68	ZY1E_AHSI_W94.33_N38.38_20211206_011716_L1A0000374910	La Cygne_20211206	La Cygne		38.3472	-94.6467	ZY1E	20211206	2021-12-06 17:27:03	2021-12-06 17:27:03	KS	CST	2021-12-06 11:27:03	1241	12/06/2021	11:27	365.5	442.9	363.173	506.763	0.395375	88.7808	36.6468	52.134	11.1523	5.30448	151.396	241.225	4.78	-1	0.5	0.0323063
69	ZY1E_AHSI_W94.40_N32.17_20210401_008144_L1A0000261751	Martin Lake_20210401	Martin Lake		32.2597	-94.5703	ZY1E	20210401	2021-04-01 17:20:59	2021-04-01 17:20:59	TX	CST	2021-04-01 11:20:59	6146	04/01/2021	11:20	1201.3	1170.4	1080.46	1073.3	0.00662678	192.854	25.986	166.868	9.57325	5.54464	168.968	172.348	3.06	-1	0.7	0.0494812	有羽流
70	ZY1E_AHSI_W94.44_N38.38_20210913_010511_L1A0000334632	La Cygne_20210913	La Cygne		38.3472	-94.6467	ZY1E	20210913	2021-09-13 17:27:32	2021-09-13 17:27:32	KS	CST	2021-09-13 11:27:32	1241	09/13/2021	11:27	662.6	671	604.53	700.786	0.159225	109.138	43.7458	65.3927	13.7385	6.01702	61.937	111.693	5.41	-1	0.5	0.057725
71	ZY1E_AHSI_W94.49_N38.38_20200711_004357_L1A0000107667	La Cygne_20200711	La Cygne		38.3472	-94.6467	ZY1E	20200711	2020-07-11 17:23:19	2020-07-11 17:23:19	KS	CST	2020-07-11 11:23:19	1241	07/11/2020	11:23	1601.4	1598	1451.58	1986.86	0.368755	381.425	30.4058	351.019	12.2299	13.12	12.8865	11.6837	2.72	1	1	0.05035	反演效果不好，只有一团排放；感觉有点像是把水汽也核算进去了，偏高很多；误差太大了
72	ZY1E_AHSI_W94.59_N32.17_20220303_012967_L1A0000414108	Martin Lake_20220303	Martin Lake		32.2597	-94.5703	ZY1E	20220303	2022-03-03 17:22:15	2022-03-03 17:22:15	TX	CST	2022-03-03 11:22:15	6146	03/03/2022	11:22	1866.9	1838.5	1684.18	565.812	0.664043	431.286	5.0346	426.251	8.04971	8.03748	20.2671	3.91831	0.58	-1	-1	0.03975	这一景本应该能够看到完美羽流的，但是羽流的方向刚好经过了湖面，导致出现一段非常大的异常高值
73	ZY1E_AHSI_W94.77_N32.17_20210104_006896_L1A0000221658	Martin Lake_20210104	Martin Lake		32.2597	-94.5703	ZY1E	20210104	2021-01-04 17:21:40	2021-01-04 17:21:40	TX	CST	2021-01-04 11:21:40	6146	01/04/2021	11:21	1286	1418.3	1208.65	1686.8	0.395609	472.541	24.5201	448.021	13.3132	4.71652	62.2498	40.6698	1.96	-1	0.5	0.0439937	水汽干扰大，几乎无反演结果
74	ZY1E_AHSI_W96.19_N31.29_20220130_012507_L1A0000399543	Oak Grove_20220130	Oak Grove		31.185	-96.4853	ZY1E	20220130	2022-01-30 17:28:05	2022-01-30 17:28:05	TX	CST	2022-01-30 11:28:05	6180	01/30/2022	11:28	1396	1398.9	1267.66	1100.82	0.131613	144.391	27.9249	116.466	8.46184	6.88818	84.3064	129.832	4.62	-1	1	0.0184687
75	ZY1E_AHSI_W96.23_N31.29_20220326_013296_L1A0000424559	Oak Grove_20220326	Oak Grove		31.185	-96.4853	ZY1E	20220326	2022-03-26 17:27:55	2022-03-26 17:27:55	TX	CST	2022-03-26 11:27:55	6180	03/26/2022	11:27	767.3	835.6	723.965	806.052	0.113385	135.125	19.1452	115.98	6.99494	7.44931	9.24383	10.1682	3.3	-1	0.7	0.0262437
76	ZY1E_AHSI_W96.26_N31.29_20201006_005607_L1A0000169633	Oak Grove_20201006	Oak Grove		31.185	-96.4853	ZY1E	20201006	2020-10-06 17:25:38	2020-10-06 17:25:38	TX	CST	2020-10-06 11:25:38	6180	10/06/2020	11:25	1874.4	1879.2	1702.24	1637.74	0.0378909	466.176	21.7845	444.391	11.9136	8.17607	3.7461	2.40999	1.93	-1	1	0.0396063	有排放，无羽流
77	ZY1E_AHSI_W96.28_N31.29_20210424_008474_L1A0000271419	Oak Grove_20210424	Oak Grove		31.185	-96.4853	ZY1E	20210424	2021-04-24 17:27:56	2021-04-24 17:27:56	TX	CST	2021-04-24 11:27:56	6180	04/24/2021	11:27	893.6	900.9	813.64	1392.18	0.711045	148.859	27.8077	121.051	8.06455	9.26433	170.62	338.397	5.95	-1	0.7	0.0302313	偏高
78	ZY1E_AHSI_W96.41_N31.29_20211206_011716_L1A0000374926	Oak Grove_20211206	Oak Grove		31.185	-96.4853	ZY1E	20211206	2021-12-06 17:29:06	2021-12-06 17:29:06	TX	CST	2021-12-06 11:29:06	6180	12/06/2021	11:29	1798.7	1790.1	1627.98	1688.68	0.0372857	170.968	48.1988	122.769	12.2681	6.47381	157.652	407.793	7.76	-1	0.7	0.02365	有一点点羽流
79	ZY1E_AHSI_W96.55_N29.95_20220130_012507_L1A0000399546	Sam Seymour_20220130	Sam Seymour		29.9172	-96.7506	ZY1E	20220130	2022-01-30 17:28:28	2022-01-30 17:28:28	TX	CST	2022-01-30 11:28:28	6179	01/30/2022	11:28	1394.8	1390.4	1263.48	1088.58	0.138427	204.588	20.5502	184.038	7.94178	7.86326	20.7301	19.5554	2.83	-1	0.7	0.0253875
80	ZY1E_AHSI_W96.58_N31.29_20200711_004359_L1A0000107694	Oak Grove_20200711	Oak Grove		31.185	-96.4853	ZY1E	20200711	2020-07-11 17:25:19	2020-07-11 17:25:19	TX	CST	2020-07-11 11:25:19	6180	07/11/2020	11:25	1869.6	1875.6	1698.34	1980.98	0.166421	313.09	24.5313	288.558	8.37221	14.05	0.822992	0.894318	3.26	1	1	0.0347312	羽流可以
81	ZY1E_AHSI_W96.59_N29.95_20220326_013296_L1A0000424562	Sam Seymour_20220326	Sam Seymour		29.9172	-96.7506	ZY1E	20220326	2022-03-26 17:28:17	2022-03-26 17:28:17	TX	CST	2022-03-26 11:28:17	6179	03/26/2022	11:28	1765.4	1773.9	1605.14	1617.15	0.0074827	214.828	20.1519	194.676	6.52971	10.7775	28.7973	38.2045	3.98	-1	1	0.0337312	能看到排放，但羽流飘到了湖面上
82	ZY1E_AHSI_W96.65_N29.95_20210424_008474_L1A0000271422	Sam Seymour_20210424	Sam Seymour		29.9172	-96.7506	ZY1E	20210424	2021-04-24 17:28:19	2021-04-24 17:28:19	TX	CST	2021-04-24 11:28:19	6179	04/24/2021	11:28	1037.5	1164.7	995.055	1189.39	0.195301	123.082	22.085	100.997	6.03597	6.11067	174.915	358.576	6.15	-1	0.7	0.0319313
83	ZY1E_AHSI_W96.74_N31.10_20200612_003941_L1A0000093912	Oak Grove_20200612	Oak Grove		31.185	-96.4853	ZY1E	20200612	2020-06-12 17:25:12	2020-06-12 17:25:12	TX	CST	2020-06-12 11:25:12	6180	06/12/2020	11:25	1759.1	1762.5	1597.11	1871.45	0.171767	251.049	26.7757	224.273	8.38532	12.5005	11.6369	15.5159	4	-1	1	0.045725	排放羽流很清晰
84	ZY1E_AHSI_W96.95_N29.95_20200711_004359_L1A0000107697	Sam Seymour_20200711	Sam Seymour		29.9172	-96.7506	ZY1E	20200711	2020-07-11 17:25:42	2020-07-11 17:25:42	TX	CST	2020-07-11 11:25:42	6179	07/11/2020	11:25	1793.1	1824.9	1638.69	1563.8	0.0457037	279.455	14.0446	265.41	5.37687	17.5655	37.0438	34.8212	2.82	-1	1	0.0252938	有羽流，还不错，飘到水面上了，前16波段清晰；作为强吸收和弱吸收的案例
85	ZY1E_AHSI_W97.05_N29.95_20200612_003941_L1A0000093915	Sam Seymour_20200612	Sam Seymour		29.9172	-96.7506	ZY1E	20200612	2020-06-12 17:25:31	2020-06-12 17:25:31	TX	CST	2020-06-12 11:25:31	6179	06/12/2020	11:25	1467.5	1562.8	1367.32	1768.94	0.293733	251.986	20.6892	231.297	6.50424	13.6044	7.27734	8.82984	3.64	-1	1	0.0372938	羽流形状很好，可以作为案例
86	ZY1E_AHSI_W98.07_N29.51_20220930_015991_L1A0000509878	J K Spruce_20220930	J K Spruce		29.3091	-98.3205	ZY1E	20220930	2022-09-30 17:31:53	2022-09-30 17:31:53	TX	CST	2022-09-30 11:31:53	7097	09/30/2022	11:31	1501.1	1499.5	1361.03	1199.12	0.118955	442.404	16.5079	425.896	9.56754	13.0787	45.2661	24.2928	1.61	-1	1	0.0220125	有噪声，有羽流
87	ZY1E_AHSI_W98.20_N29.06_20220418_013626_L1A0000435959	J K Spruce_20220418	J K Spruce		29.3091	-98.3205	ZY1E	20220418	2022-04-18 17:33:49	2022-04-18 17:33:49	TX	CST	2022-04-18 11:33:49	7097	04/18/2022	11:33	629.1	628.9	570.61	585.382	0.0258885	69.7953	21.6689	48.1264	5.59852	6.42429	177.477	380.983	6.44	-1	0.7	0.0283125
88	ZY1E_AHSI_W98.50_N29.51_20200930_005521_L1A0000170469	J K Spruce_20200930	J K Spruce		29.3091	-98.3205	ZY1E	20200930	2020-09-30 17:33:03	2020-09-30 17:33:03	TX	CST	2020-09-30 11:33:03	7097	09/30/2020	11:33	914.9	958.2	851.588	993.261	0.166363	167.329	18.9403	148.388	6.71303	8.25005	3.96023	4.19785	3.18	-1	1	0.026825
89	ZY1E_AHSI_W98.51_N29.06_20201029_005935_L1A0000194928	J K Spruce_20201029	J K Spruce		29.3091	-98.3205	ZY1E	20201029	2020-10-29 17:33:12	2020-10-29 17:33:12	TX	CST	2020-10-29 11:33:12	7097	10/29/2020	11:33	508.1	564.9	489.281	581.998	0.189496	71.2698	26.7591	44.5107	7.01755	4.51846	17.614	42.0974	7.17	1	0.7	0.020975	有团块排放
90	ZY1E_AHSI_W98.53_N29.51_20220514_013997_L1A0000447750	J K Spruce_20220514	J K Spruce		29.3091	-98.3205	ZY1E	20220514	2022-05-14 17:35:16	2022-05-14 17:35:16	TX	CST	2022-05-14 11:35:16	7097	05/14/2022	11:35	1041	1035.2	941.31	1544.21	0.640487	383.095	13.9949	369.1	6.39783	13.5781	23.9905	16.9533	2.12	1	1	0.0282438
91	ZY1F_AHSI_W101.04_N41.04_20230916_009032_L1A0000537816	Gerald Gentleman Station_20230916	Gerald Gentleman Station		41.0808	-101.141	ZY1F	20230916	2023-09-16 18:00:26	2023-09-16 18:00:26	NE	CST	2023-09-16 12:00:26	6077	09/16/2023	12:00	1330.8	1109.2	1207.28	1459.97	0.209307	194.761	18.2037	176.557	5.99831	16.5363	29.554	39.0113	3.96	1	0.7	0.0279187
92	ZY1F_AHSI_W101.05_N41.04_20231110_009821_L1A0000582861	Gerald Gentleman Station_20231110	Gerald Gentleman Station		41.0808	-101.141	ZY1F	20231110	2023-11-10 18:01:07	2023-11-10 18:01:07	NE	CST	2023-11-10 12:01:07	6077	11/10/2023	12:01	1304.1	1307.4	1183.11	1232.6	0.041833	139.906	15.2107	124.696	4.43714	5.77876	81.9168	133.251	4.88	-1	0.7	0.0120062
93	ZY1F_AHSI_W101.48_N41.04_20230624_007827_L1A0000469131	Gerald Gentleman Station_20230624	Gerald Gentleman Station		41.0808	-101.141	ZY1F	20230624	2023-06-24 18:00:53	2023-06-24 18:00:53	NE	CST	2023-06-24 12:00:53	6077	06/24/2023	12:00	688	687.2	624.143	571.811	0.0838457	57.7272	15.606	42.1213	3.95778	19.8253	30.8944	78.2659	7.6	-1	1	0.0293937	10波段效果好
94	ZY1F_AHSI_W104.83_N41.92_20230930_009233_L1A0000549577	Laramie River_20230930	Laramie River		42.1103	-104.883	ZY1F	20230930	2023-09-30 18:16:43	2023-09-30 18:16:43	WY	MST	2023-09-30 11:16:43	6204	09/30/2023	11:16	798.9	661.1	691.414	778.71	0.126257	122.206	13.4394	108.766	4.86888	6.61639	6.33714	7.18209	3.4	-1	1	0.0486813	有羽流
95	ZY1F_AHSI_W107.55_N40.59_20231020_009525_L1A0000564874	Craig_20231020	Craig		40.4627	-107.591	ZY1F	20231020	2023-10-20 18:26:24	2023-10-20 18:26:24	CO	MST	2023-10-20 11:26:24	6021	10/20/2023	11:26	729.3	742.5	666.799	35.358	0.946974	37.7288	2.87093	34.8579	7.55117	3.19209	154.3	21.602	0.42	-1	0.5	0.05525	22有一个羽流 24双羽流0.001
96	ZY1F_AHSI_W110.71_N39.27_20230817_008602_L1A0000512937	Hunter_20230817	Hunter		39.1747	-111.029	ZY1F	20230817	2023-08-17 18:36:51	2023-08-17 18:36:51	UT	MST	2023-08-17 11:36:51	6165	08/17/2023	11:36	654	651.7	592.047	687.146	0.160628	176.452	5.85472	170.597	3.24019	16.8571	123.284	84.655	2.06	1	0.7	0.00544375
97	ZY1F_AHSI_W110.73_N39.27_20230623_007813_L1A0000468861	Hunter_20230623	Hunter		39.1747	-111.029	ZY1F	20230623	2023-06-23 18:36:03	2023-06-23 18:36:03	UT	MST	2023-06-23 11:36:03	6165	06/23/2023	11:36	422.6	419.8	381.852	485.722	0.272015	53.6396	12.5838	41.0558	3.70425	3.75312	175.383	361.874	6.19	-1	0.7	0.0276563	有点不像
98	ZY1F_AHSI_W111.15_N39.27_20230719_008186_L1A0000490264	Hunter_20230719	Hunter		39.1747	-111.029	ZY1F	20230719	2023-07-19 18:38:10	2023-07-19 18:38:10	UT	MST	2023-07-19 11:38:10	6165	07/19/2023	11:38	656.412	749.552	649.001	151.541	0.766501	130.425	1.46359	128.961	3.2466	19.7428	62.1885	10.3647	0.5	1	-1	0.0160563	清晰完美
99	ZY1F_AHSI_W80.08_N39.27_20220621_002553_L1A0000190867	Harrison Power Station_20220621	Harrison Power Station		39.3844	-80.3325	ZY1F	20220621	2022-06-21 16:24:44	2022-06-21 16:24:44	WV	EST	2022-06-21 11:24:44	3944	06/21/2022	11:24	1900.6	2008.4	1763.31	1450.12	0.177617	324.662	17.2667	307.395	7.43445	13.6455	23.6876	18.3973	2.33	1	1	0.0527875	非常清晰
100	ZY1F_AHSI_W80.61_N39.27_20230418_006865_L1A0000414746	Harrison Power Station_20230418	Harrison Power Station		39.3844	-80.3325	ZY1F	20230418	2023-04-18 16:34:27	2023-04-18 16:34:27	WV	EST	2023-04-18 11:34:27	3944	04/18/2023	11:34	631.6	618	565.987	495.553	0.124443	62.2114	17.9198	44.2916	4.73119	5.29748	145.796	278.47	5.73	-1	0.7	0.0334438
101	ZY1F_AHSI_W86.57_N36.17_20230305_006234_L1A0000379047	Gallatin_20230305	Gallatin		36.3156	-86.4006	ZY1F	20230305	2023-03-05 16:54:32	2023-03-05 16:54:32	TN	CST	2023-03-05 10:54:32	3403	03/05/2023	10:54	278.3	276	250.592	350.731	0.399613	84.6261	16.3392	68.287	6.50755	3.31172	134.336	111.947	2.5	-1	0	0.034	无排放
102	ZY1F_AHSI_W88.63_N37.05_20231031_009677_L1A0000574307	Shawnee_20231031	Shawnee		37.1517	-88.775	ZY1F	20231031	2023-10-31 17:07:20	2023-10-31 17:07:20	KY	CST	2023-10-31 11:07:20	1379	10/31/2023	11:07	879.1	888.799	798.533	1463.34	0.832536	220.702	27.3406	193.361	9.27057	4.51709	99.2903	119.148	3.6	-1	0.5	0.0639375	羽流飘到了水面上，水汽干扰大
103	ZY1F_AHSI_W90.79_N38.83_20230704_007970_L1A0000476992	Labadie_20230704	Labadie		38.5583	-90.8361	ZY1F	20230704	2023-07-04 17:16:01	2023-07-04 17:16:01	MO	CST	2023-07-04 11:16:01	2103	07/04/2023	11:16	2560.7	2558.1	2322.4	2606.44	0.122305	553.26	23.0621	530.198	9.49041	17.4869	113.606	91.2632	2.41	1	0.7	0.0238063	构成羽流，有排放
104	ZY1F_AHSI_W90.93_N38.38_20231022_009549_L1A0000565683	Labadie_20231022	Labadie		38.5583	-90.8361	ZY1F	20231022	2023-10-22 17:17:43	2023-10-22 17:17:43	MO	CST	2023-10-22 11:17:43	2103	10/22/2023	11:17	2197.7	2194	1992.77	2016.96	0.0121401	573.82	22.5477	551.272	11.1118	6.55761	115.279	73.7783	1.92	-1	0.7	0.0542188	受江水影响较大
105	ZY1F_AHSI_W93.93_N45.45_20220721_002978_L1A0000173921	Sherburne County_20220721	Sherburne County		45.3792	-93.8958	ZY1F	20220721	2022-07-21 17:27:56	2022-07-21 17:27:56	MN	CST	2022-07-21 11:27:56	6090	07/21/2022	11:27	2400.9	2419.9	2185.82	2244.75	0.0269634	226.545	30.1639	196.381	7.95892	12.2217	3.11467	6.12552	5.9	1	1	0.0421313	适合作为反演案例
106	ZY1F_AHSI_W94.55_N32.17_20231210_010251_L1A0000608285	Martin Lake_20231210	Martin Lake		32.2597	-94.5703	ZY1F	20231210	2023-12-10 17:27:08	2023-12-10 17:27:08	TX	CST	2023-12-10 11:27:08	6146	12/10/2023	11:27	1027.6	1026.4	931.733	1001.33	0.0747012	133.92	31.0818	102.839	9.1209	8.18368	176.048	281.09	4.79	-1	0.7	0.0420188	有羽流
107	ZY1F_AHSI_W94.55_N38.38_20220920_003853_L1A0000229994	La Cygne_20220920	La Cygne		38.3472	-94.6467	ZY1F	20220920	2022-09-20 17:24:31	2022-09-20 17:24:31	KS	CST	2022-09-20 11:24:31	1241	09/20/2022	11:24	759.1	765.6	691.003	799.936	0.157646	102.499	23.2585	79.2406	6.56942	5.13389	151.757	253.434	5.01	-1	0.7	0.0344062	水汽影响太大了
108	ZY1F_AHSI_W94.56_N38.38_20230816_008587_L1A0000512042	La Cygne_20230816	La Cygne		38.3472	-94.6467	ZY1F	20230816	2023-08-16 17:31:23	2023-08-16 17:31:23	KS	CST	2023-08-16 11:31:23	1241	08/16/2023	11:31	1273.7	1441.1	1233.94	1002.18	0.187827	188.935	17.5051	171.43	6.88442	14.3251	137.353	128.196	2.8	1	0.7	0.050975	飘到湖面上了
109	ZY1F_AHSI_W94.57_N32.17_20220802_003150_L1A0000184740	Martin Lake_20220802	Martin Lake		32.2597	-94.5703	ZY1F	20220802	2022-08-02 17:17:29	2022-08-02 17:17:29	TX	CST	2022-08-02 11:17:29	6146	08/02/2022	11:17	2263.6	2623.6	2146.04	2287.43	0.0658858	346.227	25.7992	320.428	8.94962	9.86751	129.767	146.636	3.39	-1	0.7	0.0492125	有排放，圆形，堆叠状，飘到湖面上
110	ZY1F_AHSI_W94.58_N38.38_20230108_005431_L1A0000329362	La Cygne_20230108	La Cygne		38.3472	-94.6467	ZY1F	20230108	2023-01-08 17:27:27	2023-01-08 17:27:27	KS	CST	2023-01-08 11:27:27	1241	01/08/2023	11:27	1406.5	1398.2	1272.57	1093.95	0.14036	489.45	10.2996	479.15	8.69932	5.40822	29.6086	11.8434	1.2	1	0.7	0.0192812	噪声较大
111	ZY1F_AHSI_W94.61_N32.17_20221120_004728_L1A0000290523	Martin Lake_20221120	Martin Lake		32.2597	-94.5703	ZY1F	20221120	2022-11-20 17:20:45	2022-11-20 17:20:45	TX	CST	2022-11-20 11:20:45	6146	11/20/2022	11:20	2635.2	2664.4	2399.44	2442.43	0.0179158	426.666	34.7575	391.909	12.8112	7.37591	149.951	148.451	2.97	-1	0.7	0.0442188	有一点羽流比较稀疏
112	ZY1F_AHSI_W96.64_N31.29_20220727_003064_L1A0000178119	Oak Grove_20220727	Oak Grove		31.185	-96.4853	ZY1F	20220727	2022-07-27 17:24:51	2022-07-27 17:24:51	TX	CST	2022-07-27 11:24:51	6180	07/27/2022	11:24	1241	1493.7	1217.51	1153.68	0.0524317	159.287	14.0475	145.24	4.50394	11.6246	25.8781	32.6926	3.79	1	1	0.0274375
113	ZY1F_AHSI_W96.65_N31.29_20230304_006220_L1A0000378222	Oak Grove_20230304	Oak Grove		31.185	-96.4853	ZY1F	20230304	2023-03-04 17:30:35	2023-03-04 17:30:35	TX	CST	2023-03-04 11:30:35	6180	03/04/2023	11:30	650.4	654.3	591.802	631.343	0.0668143	96.4008	17.1133	79.2875	5.49711	7.6534	9.71045	12.2999	3.8	-1	1	0.03295	被云挡住了
114	ZY1F_AHSI_W96.65_N31.29_20230816_008587_L1A0000512058	Oak Grove_20230816	Oak Grove		31.185	-96.4853	ZY1F	20230816	2023-08-16 17:33:23	2023-08-16 17:33:23	TX	CST	2023-08-16 11:33:23	6180	08/16/2023	11:33	1820.5	1806.6	1644.59	2238.58	0.361174	428.477	12.1398	416.337	4.45274	23.7864	1.93802	1.67962	2.6	1	1	0.0249125	羽流很好，简直完美！！！适合作为案例
115	ZY1F_AHSI_W96.67_N31.29_20230108_005431_L1A0000329378	Oak Grove_20230108	Oak Grove		31.185	-96.4853	ZY1F	20230108	2023-01-08 17:29:27	2023-01-08 17:29:27	TX	CST	2023-01-08 11:29:27	6180	01/08/2023	11:29	1957.3	1974.5	1783.17	1621.75	0.0905292	199.664	20.8892	178.774	6.1419	8.72108	5.51504	8.08873	4.4	1	1	0.0265	有羽流，水池下方有一个点源
116	ZY1F_AHSI_W97.01_N29.95_20230304_006220_L1A0000378225	Sam Seymour_20230304	Sam Seymour		29.9172	-96.7506	ZY1F	20230304	2023-03-04 17:30:57	2023-03-04 17:30:57	TX	CST	2023-03-04 11:30:57	6179	03/04/2023	11:30	672.8	881.2	704.883	1403	0.990397	239.119	17.173	221.946	6.10635	8.72135	10.8963	10.9326	3.01	1	1	0.0317438
117	ZY1F_AHSI_W97.01_N29.95_20230816_008587_L1A0000512061	Sam Seymour_20230816	Sam Seymour		29.9172	-96.7506	ZY1F	20230816	2023-08-16 17:33:45	2023-08-16 17:33:45	TX	CST	2023-08-16 11:33:45	6179	08/16/2023	11:33	1354.8	1363.7	1233.49	1321.65	0.0714664	284.415	10.0453	274.369	3.96218	12.3322	5.35032	4.22675	2.37	1	1	0.0249875
118	ZY1F_AHSI_W98.47_N29.51_20221013_004183_L1A0000250381	J K Spruce_20221013	J K Spruce		29.3091	-98.3205	ZY1F	20221013	2022-10-13 17:33:02	2022-10-13 17:33:02	TX	CST	2022-10-13 11:33:02	7097	10/13/2022	11:33	1492.3	1495.9	1355.59	1889.53	0.393886	186.729	18.4947	168.234	4.72401	8.39757	62.8481	120.668	5.76	-1	0.7	0.025625	噪声较大

## Sheet: 按设施统计1223
行标签	平均值项:Facility ID	平均值项:反演结果	平均值项:反演误差	平均值项:不确定度
Antelope Valley	6469	1056.4	1.43024	119.061
Craig	6021	722.554	0.291938	213.622
Four Corners Steam Elec Station	2442	717.937	0.33265	176.126
Gallatin	3403	478.498	0.320634	169.126
Gerald Gentleman Station	6077	1016.83	0.241109	129.94
Harrington Station	6193	503.474	1.58185	50.4006
Harrison Power Station	3944	726.187	0.14056	180.883
Hunter	6165	481.008	0.462094	166.141
J K Spruce	7097	1128.49	0.23801	241.547
Jim Bridger	8066	846.681	0.265653	104.633
La Cygne	1241	949.105	0.221442	211.104
Labadie	2103	1972.84	0.0758091	540.159
Laramie River	6204	965.056	0.079205	142.106
Martin Lake	6146	1557.51	0.225375	316.273
Oak Grove	6180	1472.68	0.16566	259.057
Sam Seymour	6179	1413.71	0.285906	232.386
Shawnee	1379	907.014	0.407244	202.784
Sherburne County	6090	1395.98	0.307208	237.116
Trimble County	6071	948.574	1.02213	319.717
White Bluff	6009	753.219	0.899278	188.491
总计	5258.16	1056.18	0.385429	217.783

## Sheet: 2024.11
序号	filename	foldername	Facility Name	Latitude	Longitude	satellite	date	Time of Satellite	UTC	State	Zone	Local Standard Time	Facility ID	day LST	time	前整点Q	后整点Q	avg Q(ton/h)	反演结果	反演误差	不确定度	风速	提取	排放	背景	备注
1	GF5_AHSI_W107.84_N40.19_20190803_006569_L10000052859	Craig_20190802	Craig	40.4627	-107.591	GF5	20190803	2019-08-03 04:08:09	2019-08-02 20:08:09	CO	MST	2019-08-02 13:08:09	6021	08/02/2019	13:08	1356.3	1381	1233.4	1275.64	0.0342429	198.052	3.26	1	1	0.0706335
2	GF5_AHSI_W111.09_N39.21_20191118_008126_L10000065664	Hunter_20191118	Hunter	39.1747	-111.029	GF5	20191118	2019-11-18 04:20:29	2019-11-17 20:20:29	UT	MST	2019-11-17 13:20:29	6165	11/17/2019	13:20	889	885.7	805.489	365.216	0.546591	198.291	0.91	-1	0.5	0.023275
3	GF5_AHSI_W85.14_N38.72_20191225_008664_L10000068784	Trimble County_20191225	Trimble County	38.5847	-85.4117	GF5	20191225	2019-12-25 02:36:43	2019-12-24 18:36:43	KY	EST	2019-12-24 13:36:43	6071	12/24/2019	13:36	1037.4	1080.8	964.737	926.386	0.0397523	449.106	1.06	1	1	0.0318812
4	GF5A_AHSI_W108.6_N36.7_20231227_005597_L10000078715	Four Corners Steam Elec Station_20231227	Four Corners Steam Elec Station	36.69	-108.481	GF5A	20231227	2023-12-27 20:12:59	2023-12-27 20:12:59	NM	MST	2023-12-27 13:12:59	2442	12/27/2023	13:12	797	796.8	722.99	705.125	0.0247092	88.8947	4.38	-1	0.7	0.0536812
5	GF5A_AHSI_W108.7_N41.7_20231213_005393_L10000074107	Jim Bridger_20231213	Jim Bridger	41.7378	-108.787	GF5A	20231213	2023-12-13 20:08:54	2023-12-13 20:08:54	WY	MST	2023-12-13 13:08:54	8066	12/13/2023	13:08	1825.9	1677	1638.42	1035.07	0.368251	143.675	4	1	1	0.0365062
6	GF5A_AHSI_W108.8_N41.7_20230923_004213_L10000054221	Jim Bridger_20230923	Jim Bridger	41.7378	-108.787	GF5A	20230923	2023-09-23 20:11:46	2023-09-23 20:11:46	WY	MST	2023-09-23 13:11:46	8066	09/23/2023	13:11	460.9	452.2	416.674	297.889	0.285079	28.6958	7.1	-1	0	0.0322812
7	GF5A_AHSI_W94.3_N32.3_20230908_003994_L10000051261	Martin Lake_20230908	Martin Lake	32.2597	-94.5703	GF5A	20230908	2023-09-08 19:22:37	2023-09-08 19:22:37	TX	CST	2023-09-08 13:22:37	6146	09/08/2023	13:22	2712.1	2709.3	2459.44	2593.78	0.0546195	365.259	3.48	1	1	0.0497125	有羽流、但周围水汽干扰也很大
8	GF5A_AHSI_W98.5_N29.3_20230814_003630_L10000044804	J K Spruce_20230814	J K Spruce	29.3091	-98.3205	GF5A	20230814	2023-08-14 19:42:15	2023-08-14 19:42:15	TX	CST	2023-08-14 13:42:15	7097	08/14/2023	13:42	1389.2	1408.7	1272.64	1105.93	0.130996	366.309	1.7	1	1	0.0162	完美
9	GF5B_AHSI_W100.9_N41.2_20220628_004292_L10000156032	Gerald Gentleman Station_20220628	Gerald Gentleman Station	41.0808	-101.141	GF5B	20220628	2022-06-29 01:41:40	2022-06-28 17:41:40	NE	CST	2022-06-28 11:41:40	6077	06/28/2022	11:41	1314.5	1320.1	1195.97	300.691	0.748579	81.2901	2	1	0.5	0.0238438	24波段可见排放，有排放，但是算不准，靠近湖边
10	GF5B_AHSI_W101.1_N41.2_20211220_001524_L10000044164	Gerald Gentleman Station_20211220	Gerald Gentleman Station	41.0808	-101.141	GF5B	20211220	2021-12-21 01:37:21	2021-12-20 17:37:21	NE	CST	2021-12-20 11:37:21	6077	12/20/2021	11:37	1201.3	1283	1135.51	1002.09	0.117494	127.244	4.12	1	1	0.00629375
11	GF5B_AHSI_W101.6_N47.5_20220619_004161_L10000151101	Antelope Valley_20220619	Antelope Valley	47.371	-101.836	GF5B	20220619	2022-06-20 01:51:31	2022-06-19 17:51:31	ND	CST	2022-06-19 11:51:31	6469	06/19/2022	11:51	522.7	565.6	507.266	652.096	0.28551	80.3603	4.53	-1	1	0.0829125
12	GF5B_AHSI_W101.9_N35.3_20220424_003345_L10000118254	Harrington Station_20220424	Harrington Station	35.2972	-101.748	GF5B	20220424	2022-04-25 01:38:35	2022-04-24 17:38:35	TX	CST	2022-04-24 11:38:35	6193	04/24/2022	11:38	296.2	292.8	266.755	97.287	0.635294	13.8912	6.66	-1	0	0.0359937
13	GF5B_AHSI_W102.0_N47.5_20220316_002777_L10000118963	Antelope Valley_20220316	Antelope Valley	47.371	-101.836	GF5B	20220316	2022-03-17 01:50:55	2022-03-16 17:50:55	ND	CST	2022-03-16 11:50:55	6469	03/16/2022	11:50	560.6	524.1	480.974	1073.45	1.23183	90.6876	9.18	-1	0	0.0319938
14	GF5B_AHSI_W102.1_N47.5_20220626_004263_L10000154923	Antelope Valley_20220626	Antelope Valley	47.371	-101.836	GF5B	20220626	2022-06-27 01:53:27	2022-06-26 17:53:27	ND	CST	2022-06-26 11:53:27	6469	06/26/2022	11:53	667	827.8	733.949	751.323	0.0236718	78.0155	6.59	1	1	0.0618063	能看见一点
15	GF5B_AHSI_W107.5_N40.2_20230926_010921_L10000396892	Craig_20230926	Craig	40.4627	-107.591	GF5B	20230926	2023-09-27 02:12:39	2023-09-26 18:12:39	CO	MST	2023-09-26 11:12:39	6021	09/26/2023	11:12	761.2	909.1	717.384	642.879	0.103856	302.719	1.1	-1	0.7	0.0476125
16	GF5B_AHSI_W107.8_N40.7_20221018_005924_L10000222668	Craig_20221018	Craig	40.4627	-107.591	GF5B	20221018	2022-10-19 02:11:02	2022-10-18 18:11:02	CO	MST	2022-10-18 11:11:02	6021	10/18/2022	11:11	830.6	831.6	753.674	772.348	0.0247779	273.375	1.63	1	1	0.0508125	两个源
17	GF5B_AHSI_W108.2_N36.7_20220610_004030_L10000145798	Four Corners Steam Elec Station_20220610	Four Corners Steam Elec Station	36.69	-108.481	GF5B	20220610	2022-06-11 02:06:07	2022-06-10 18:06:07	NM	MST	2022-06-10 11:06:07	2442	06/10/2022	11:06	1471.5	1052.86	1296.94	1013.26	0.218734	167.814	2.97	1	1	0.0680875	完美
18	GF5B_AHSI_W108.3_N36.7_20220420_003287_L10000117219	Four Corners Steam Elec Station_20220420	Four Corners Steam Elec Station	36.69	-108.481	GF5B	20220420	2022-04-21 02:05:10	2022-04-20 18:05:10	NM	MST	2022-04-20 11:05:10	2442	04/20/2022	11:05	539.3	621.1	495.429	232.696	0.530313	53.3386	2.3	-1	0.7	0.0525562	有排放
19	GF5B_AHSI_W108.3_N36.7_20240106_012407_L10000448627	Four Corners Steam Elec Station_20240106	Four Corners Steam Elec Station	36.69	-108.481	GF5B	20240106	2024-01-07 02:12:33	2024-01-06 18:12:33	NM	MST	2024-01-06 11:12:33	2442	01/06/2024	11:12	1357.4	1191	1201.22	622.694	0.481616	266.152	1.32	1	1	0.0689
20	GF5B_AHSI_W108.8_N41.7_20220212_002311_L10000077220	Jim Bridger_20220212	Jim Bridger	41.7378	-108.787	GF5B	20220212	2022-02-13 02:10:06	2022-02-12 18:10:06	WY	MST	2022-02-12 11:10:06	8066	02/12/2022	11:10	580.1	545	520.951	699.748	0.343213	83.6041	4.49	1	1	0.0305625	有排放，但周围噪声明显更大，不适合反演
21	GF5B_AHSI_W109.0_N41.6_20231031_011431_L10000413197	Jim Bridger_20231031	Jim Bridger	41.7378	-108.787	GF5B	20231031	2023-11-01 02:20:04	2023-10-31 18:20:04	WY	MST	2023-10-31 11:20:04	8066	10/31/2023	11:20	1208.8	1174.8	1086.32	1144	0.0530966	107.361	6.01	-1	1	0.0373375
22	GF5B_AHSI_W109.1_N41.6_20231221_012174_L10000440228	Jim Bridger_20231221	Jim Bridger	41.7378	-108.787	GF5B	20231221	2023-12-22 02:20:37	2023-12-21 18:20:37	WY	MST	2023-12-21 11:20:37	8066	12/21/2023	11:20	994.7	868	864.063	749.324	0.13279	125.307	3.18	1	0.7	0.0353188
23	GF5B_AHSI_W110.9_N39.2_20220418_003258_L10000114473	Hunter_20220418	Hunter	39.1747	-111.029	GF5B	20220418	2022-04-19 02:17:59	2022-04-18 18:17:59	UT	MST	2022-04-18 11:17:59	6165	04/18/2022	11:17	909.6	899.7	822.631	133.406	0.83783	98.9024	0.6	1	-1	0.0108125	低风速
24	GF5B_AHSI_W110.9_N39.2_20240104_012378_L10000447404	Hunter_20240104	Hunter	39.1747	-111.029	GF5B	20240104	2024-01-05 02:25:25	2024-01-04 18:25:25	UT	MST	2024-01-04 11:25:25	6165	01/04/2024	11:25	353.2	352.6	320.191	267.579	0.164312	198.958	0.6	1	1	0.0598125
25	GF5B_AHSI_W80.4_N39.2_20231012_011153_L10000404427	Harrison Power Station_20231012	Harrison Power Station	39.3844	-80.3325	GF5B	20231012	2023-10-13 00:23:33	2023-10-12 16:23:33	WV	EST	2023-10-12 11:23:33	3944	10/12/2023	11:23	229.9	228.3	208.005	232.887	0.119621	150.94	0.73	-1	0.5	0.0449437	伪排放
26	GF5B_AHSI_W85.2_N38.7_20231031_011430_L10000413176	Trimble County_20231031	Trimble County	38.5847	-85.4117	GF5B	20231031	2023-11-01 00:42:01	2023-10-31 16:42:01	KY	EST	2023-10-31 11:42:01	6071	10/31/2023	11:42	278.2	284.99	256.691	1221.28	3.75781	199.27	3.2	-1	0.5	0.0401562	探测到了，但算的不准（该案例说明GF5的探测下限达到256t/h, 3m/s）
27	GF5B_AHSI_W85.3_N38.7_20230714_009842_L10000360353	Trimble County_20230714	Trimble County	38.5847	-85.4117	GF5B	20230714	2023-07-15 00:42:09	2023-07-14 16:42:09	KY	EST	2023-07-14 11:42:09	6071	07/14/2023	11:42	1373.5	1399.05	1262.24	1355.58	0.0739414	537.874	1.52	1	1	0.0529188
28	GF5B_AHSI_W88.6_N37.1_20231212_012042_L10000435322	Shawnee_20231212	Shawnee	37.1517	-88.775	GF5B	20231212	2023-12-13 00:54:21	2023-12-12 16:54:21	KY	CST	2023-12-12 10:54:21	1379	12/12/2023	10:54	943.299	928	843.255	1183.51	0.403497	373.029	1.77	1	0.5	0.0467125	羽流飘到了水面上，水汽干扰大
29	GF5B_AHSI_W88.6_N37.2_20220326_002922_L10000100107	Shawnee_20220326	Shawnee	37.1517	-88.775	GF5B	20220326	2022-03-27 00:46:28	2022-03-26 16:46:28	KY	CST	2022-03-26 10:46:28	1379	03/26/2022	10:46	811.401	780.998	714.945	670.614	0.0620056	73.4084	5.61	-1	0.5	0.0403437	羽流飘到了水面上，水汽干扰大
30	GF5B_AHSI_W88.7_N37.2_20230825_010454_L10000380643	Shawnee_20230825	Shawnee	37.1517	-88.775	GF5B	20230825	2023-08-26 00:54:41	2023-08-25 16:54:41	KY	CST	2023-08-25 10:54:41	1379	08/25/2023	10:54	1266.6	1261.2	1144.63	996.715	0.129228	197.3	2.61	1	1	0.05605	有排放，圆形，无羽流形状
31	GF5B_AHSI_W92.2_N34.3_20231006_011066_L10000401605	White Bluff_20231006	White Bluff	34.4236	-92.1392	GF5B	20231006	2023-10-07 01:05:59	2023-10-06 17:05:59	AR	CST	2023-10-06 11:05:59	6009	10/06/2023	11:05	320	380.1	294.843	645.46	1.18917	127.636	2.8	-1	0.5	0.05195
32	GF5B_AHSI_W94.2_N45.6_20220602_003913_L10000141558	Sherburne County_20220602	Sherburne County	45.3792	-93.8958	GF5B	20220602	2022-06-03 01:19:01	2022-06-02 17:19:01	MN	CST	2022-06-02 11:19:01	6090	06/02/2022	11:19	411.9	411.2	373.468	630.636	0.688593	75.8409	4.82	-1	0.7	0.0113437
33	GF5B_AHSI_W94.3_N32.3_20231103_011474_L10000414550	Martin Lake_20231103	Martin Lake	32.2597	-94.5703	GF5B	20231103	2023-11-04 01:12:54	2023-11-03 17:12:54	TX	CST	2023-11-03 11:12:54	6146	11/03/2023	11:12	1488.1	1487.9	1349.95	1692.31	0.253615	370.567	2.34	-1	1	0.0425813	有羽流，水面噪声大
34	GF5B_AHSI_W94.5_N32.3_20220407_003097_L10000107611	Martin Lake_20220407	Martin Lake	32.2597	-94.5703	GF5B	20220407	2022-04-08 01:05:50	2022-04-07 17:05:50	TX	CST	2022-04-07 11:05:50	6146	04/07/2022	11:05	1469.4	1514	1336.39	674.393	0.495362	71.2576	6.16	1	0.5	0.0462562
35	GF5B_AHSI_W94.5_N38.2_20221019_005938_L10000223276	La Cygne_20221019	La Cygne	38.3472	-94.6467	GF5B	20221019	2022-10-20 01:15:33	2022-10-19 17:15:33	KS	CST	2022-10-19 11:15:33	1241	10/19/2022	11:15	708.8	713.2	644.01	553.267	0.140904	110.276	2.6	-1	0.7	0.054075	32波段可见排放源
36	GF5B_AHSI_W96.5_N31.3_20221019_005938_L10000223290	Oak Grove_20221019	Oak Grove	31.185	-96.4853	GF5B	20221019	2022-10-20 01:17:28	2022-10-19 17:17:28	TX	CST	2022-10-19 11:17:28	6180	10/19/2022	11:17	1788.5	1803.2	1626.28	1548.93	0.0475589	590.801	1.55	1	1	0.0284438	有排放
37	GF5B_AHSI_W96.9_N29.8_20221019_005938_L10000223293	Sam Seymour_20221019	Sam Seymour	29.9172	-96.7506	GF5B	20221019	2022-10-20 01:17:53	2022-10-19 17:17:53	TX	CST	2022-10-19 11:17:53	6179	10/19/2022	11:17	964.3	979	878.577	1357.17	0.544734	256.738	2.61	-1	1	0.01895
38	ZY1E_AHSI_W101.24_N41.04_20230805_020428_L1A0000637084	Gerald Gentleman Station_20230805	Gerald Gentleman Station	41.0808	-101.141	ZY1E	20230805	2023-08-05 17:48:20	2023-08-05 17:48:20	NE	CST	2023-08-05 11:48:20	6077	08/05/2023	11:48	1358.5	1357.1	1231.39	1533.82	0.245599	148.41	6.02	-1	0.7	0.02355
39	ZY1E_AHSI_W101.46_N35.28_20220305_012995_L1A0000414997	Harrington Station_20220305	Harrington Station	35.2972	-101.748	ZY1E	20220305	2022-03-05 17:52:24	2022-03-05 17:52:24	TX	CST	2022-03-05 11:52:24	6193	03/05/2022	11:52	167.2	177.3	159.622	808.979	4.06808	56.9022	10.76	1	0	0.0345688	排放强度太低了，无法检测到
40	ZY1E_AHSI_W101.95_N35.28_20220331_013368_L1A0000427095	Harrington Station_20220331	Harrington Station	35.2972	-101.748	ZY1E	20220331	2022-03-31 17:54:08	2022-03-31 17:54:08	TX	CST	2022-03-31 11:54:08	6193	03/31/2022	11:54	641.9	638.7	579.709	604.156	0.04217	62.5103	5.28	1	1	0.039525
41	ZY1E_AHSI_W101.95_N47.64_20201123_006296_L1A0000193277	Antelope Valley_20201123	Antelope Valley	47.371	-101.836	ZY1E	20201123	2020-11-23 18:05:58	2020-11-23 18:05:58	ND	CST	2020-11-23 12:05:58	6469	11/23/2020	12:05	372.7	365.9	337.594	1748.72	4.17996	162.928	6.44	1	0	0.0407125	这一景还是不太好反演
42	ZY1E_AHSI_W104.76_N41.92_20230917_021045_L1A0000655064	Laramie River_20230917	Laramie River	42.1103	-104.883	ZY1E	20230917	2023-09-17 18:02:08	2023-09-17 18:02:08	WY	MST	2023-09-17 11:02:08	6204	09/17/2023	11:02	1667.1	1881.6	1518.85	1523.98	0.00337354	124.379	7.79	-1	0.7	0.0385938	羽流良好
43	ZY1E_AHSI_W104.93_N41.92_20230625_019840_L1A0000620580	Laramie River_20230625	Laramie River	42.1103	-104.883	ZY1E	20230625	2023-06-25 18:05:08	2023-06-25 18:05:08	WY	MST	2023-06-25 11:05:08	6204	06/25/2023	11:05	1043.4	1114.7	951.947	1041.59	0.0941639	209.223	2.52	1	1	0.0640687	有排放
44	ZY1E_AHSI_W105.13_N42.36_20200825_005004_L1A0000136593	Laramie River_20200825	Laramie River	42.1103	-104.883	ZY1E	20200825	2020-08-25 18:10:51	2020-08-25 18:10:51	WY	MST	2020-08-25 11:10:51	6204	08/25/2020	11:10	520.3	520.5	472.038	515.95	0.0930255	83.1512	3.13	1	1	0.0039875
45	ZY1E_AHSI_W107.47_N40.60_20231007_021332_L1A0000663395	Craig_20231007	Craig	40.4627	-107.591	ZY1E	20231007	2023-10-07 18:11:00	2023-10-07 18:11:00	CO	MST	2023-10-07 11:11:00	6021	10/07/2023	11:11	487.2	518.1	447.12	656.686	0.468704	269.322	1.36	1	0.7	0.050575	有排放 不像羽流
46	ZY1E_AHSI_W107.63_N40.60_20230715_020127_L1A0000628485	Craig_20230715	Craig	40.4627	-107.591	ZY1E	20230715	2023-07-15 18:14:00	2023-07-15 18:14:00	CO	MST	2023-07-15 11:14:00	6021	07/15/2023	11:14	892.4	903.4	811.9	952.417	0.173071	168.331	2.81	-1	1	0.0207937	19波段较好
47	ZY1E_AHSI_W108.64_N36.61_20200917_005334_L1A0000154763	Four Corners Steam Elec Station_20200917	Four Corners Steam Elec Station	36.69	-108.481	ZY1E	20200917	2020-09-17 18:19:28	2020-09-17 18:19:28	NM	MST	2020-09-17 11:19:28	2442	09/17/2020	11:19	1507.6	1506	1367.21	858.119	0.372359	156.05	2.71	1	1	0.07125	羽流形状好
48	ZY1E_AHSI_W108.68_N41.92_20200911_005248_L1A0000148906	Jim Bridger_20200911	Jim Bridger	41.7378	-108.787	ZY1E	20200911	2020-09-11 18:24:53	2020-09-11 18:24:53	WY	MST	2020-09-11 11:24:53	8066	09/11/2020	11:24	1437.4	1314.4	1259.35	1352.99	0.0743528	112.981	7.11	-1	1	0.0484875	排放位置在山上，不像排放源
49	ZY1E_AHSI_W108.72_N36.61_20231007_021332_L1A0000663404	Four Corners Steam Elec Station_20231007	Four Corners Steam Elec Station	36.69	-108.481	ZY1E	20231007	2023-10-07 18:12:07	2023-10-07 18:12:07	NM	MST	2023-10-07 11:12:07	2442	10/07/2023	11:12	1532.3	1509.9	1386.01	875.727	0.368169	289.375	1.7	1	1	0.05145	羽流很完整，可以作为案例
50	ZY1E_AHSI_W108.78_N41.92_20200813_004832_L1A0000126505	Jim Bridger_20200813	Jim Bridger	41.7378	-108.787	ZY1E	20200813	2020-08-13 18:24:46	2020-08-13 18:24:46	WY	MST	2020-08-13 11:24:46	8066	08/13/2020	11:24	1902.1	1640.8	1630.74	647.743	0.602791	64.9622	5.41	-1	0.7	0.0312687	羽流形状很好，不过怎么风速有点问题
51	ZY1E_AHSI_W111.21_N39.27_20201004_005578_L1A0000168618	Hunter_20201004	Hunter	39.1747	-111.029	ZY1E	20201004	2020-10-04 18:32:36	2020-10-04 18:32:36	UT	MST	2020-10-04 11:32:36	6165	10/04/2020	11:32	656	681.6	607.499	1002.94	0.650932	242.863	2.13	1	1	0.0225375	完美
52	ZY1E_AHSI_W111.31_N39.27_20200905_005163_L1A0000144224	Hunter_20200905	Hunter	39.1747	-111.029	ZY1E	20200905	2020-09-05 18:32:32	2020-09-05 18:32:32	UT	MST	2020-09-05 11:32:32	6165	09/05/2020	11:32	1057.9	1295.6	1074.72	754.513	0.297943	211.778	1.91	-1	0.7	0.0087125	有羽流
53	ZY1E_AHSI_W85.49_N38.38_20220327_013308_L1A0000425150	Trimble County_20220327	Trimble County	38.5847	-85.4117	ZY1E	20220327	2022-03-27 16:51:14	2022-03-27 16:51:14	KY	EST	2022-03-27 11:51:14	6071	03/27/2022	11:51	412.9	409.2	371.723	291.05	0.217027	48.8362	3.62	-1	0	0.042875
54	ZY1E_AHSI_W86.17_N36.17_20220327_013308_L1A0000425155	Gallatin_20220327	Gallatin	36.3156	-86.4006	ZY1E	20220327	2022-03-27 16:51:51	2022-03-27 16:51:51	TN	CST	2022-03-27 10:51:51	3403	03/27/2022	10:51	307	306.4	278.043	199.182	0.283629	50.5308	2.48	1	0	0.02585
55	ZY1E_AHSI_W86.59_N36.17_20221004_016048_L1A0000511602	Gallatin_20221004	Gallatin	36.3156	-86.4006	ZY1E	20221004	2022-10-04 16:51:33	2022-10-04 16:51:33	TN	CST	2022-10-04 10:51:33	3403	10/04/2022	10:51	758.6	764.3	692.586	885.581	0.278659	349.593	1.48	-1	0.7	0.0246187	像伪排放源
56	ZY1E_AHSI_W88.87_N37.06_20211128_011601_L1A0000371189	Shawnee_20211128	Shawnee	37.1517	-88.775	ZY1E	20211128	2021-11-28 17:03:59	2021-11-28 17:03:59	KY	CST	2021-11-28 11:03:59	1379	11/28/2021	11:03	406.4	406.4	368.68	464.253	0.259232	76.742	3.51	-1	0.5	0.0511062	有排放
57	ZY1E_AHSI_W88.95_N37.06_20210119_007111_L1A0000229838	Shawnee_20210119	Shawnee	37.1517	-88.775	ZY1E	20210119	2021-01-19 17:02:53	2021-01-19 17:02:53	KY	CST	2021-01-19 11:02:53	1379	01/19/2021	11:02	868.501	669.401	781.87	834.872	0.0677887	318.148	1.57	1	1	0.01875	右下角伪排放源
58	ZY1E_AHSI_W89.08_N37.06_20201221_006696_L1A0000212411	Shawnee_20201221	Shawnee	37.1517	-88.775	ZY1E	20201221	2020-12-21 17:03:04	2020-12-21 17:03:04	KY	CST	2020-12-21 11:03:04	1379	12/21/2020	11:03	386.9	386.599	350.976	735.794	1.09642	79.5356	6.44	-1	0	0.0439312
59	ZY1E_AHSI_W90.79_N38.83_20210925_010683_L1A0000340283	Labadie_20210925	Labadie	38.5583	-90.8361	ZY1E	20210925	2021-09-25 17:13:23	2021-09-25 17:13:23	MO	CST	2021-09-25 11:13:23	2103	09/25/2021	11:13	1746.6	1732.6	1581.74	1683.52	0.0643468	289.973	2.94	-1	1	0.03895
60	ZY1E_AHSI_W90.90_N38.38_20220113_012261_L1A0000391512	Labadie_20220113	Labadie	38.5583	-90.8361	ZY1E	20220113	2022-01-13 17:13:19	2022-01-13 17:13:19	MO	CST	2022-01-13 11:13:19	2103	01/13/2022	11:13	1841.4	1849.6	1672.1	1513.31	0.0949654	493.741	1.73	-1	1	0.0253375
61	ZY1E_AHSI_W90.98_N38.38_20230329_018573_L1A0000585856	Labadie_20230329	Labadie	38.5583	-90.8361	ZY1E	20230329	2023-03-29 17:07:56	2023-03-29 17:07:56	MO	CST	2023-03-29 11:07:56	2103	03/29/2023	11:07	2464.5	2453.2	2234.56	2043.98	0.0852885	755.658	1.58	1	0.7	0.0362437	羽流沿着江面规整陈列
62	ZY1E_AHSI_W91.94_N34.40_20220726_015044_L1A0000481359	White Bluff_20220726	White Bluff	34.4236	-92.1392	ZY1E	20220726	2022-07-26 17:12:13	2022-07-26 17:12:13	AR	CST	2022-07-26 11:12:13	6009	07/26/2022	11:12	1389.4	1742.2	1324.45	1075.96	0.187617	174.819	3.26	-1	0.7	0.0397313	微弱的排放
63	ZY1E_AHSI_W92.11_N34.40_20220113_012261_L1A0000391521	White Bluff_20220113	White Bluff	34.4236	-92.1392	ZY1E	20220113	2022-01-13 17:14:27	2022-01-13 17:14:27	AR	CST	2022-01-13 11:14:27	6009	01/13/2022	11:14	901.3	897.1	816.757	686.383	0.159624	164.4	2.28	-1	1	0.0441937	没有排放
64	ZY1E_AHSI_W92.15_N34.40_20220309_013050_L1A0000416988	White Bluff_20220309	White Bluff	34.4236	-92.1392	ZY1E	20220309	2022-03-09 17:14:19	2022-03-09 17:14:19	AR	CST	2022-03-09 11:14:19	6009	03/09/2022	11:14	280.3	279.1	254.03	961.001	2.78302	175.6	2.83	1	0.5	0.0195312	很多云，不适合反演
65	ZY1E_AHSI_W92.33_N34.40_20231104_021729_L1A0000674441	White Bluff_20231104	White Bluff	34.4236	-92.1392	ZY1E	20231104	2023-11-04 17:03:42	2023-11-04 17:03:42	AR	CST	2023-11-04 11:03:42	6009	11/04/2023	11:03	537.3	433.2	482.708	397.288	0.17696	227.796	0.86	1	1	0.0379188
66	ZY1E_AHSI_W93.56_N45.45_20220320_013210_L1A0000421897	Sherburne County_20220320	Sherburne County	45.3792	-93.8958	ZY1E	20220320	2022-03-20 17:31:14	2022-03-20 17:31:14	MN	CST	2022-03-20 11:31:14	6090	03/20/2022	11:31	1451.2	1311.2	1250.89	1302.53	0.0412848	372.512	1.91	-1	0.7	0.046825
67	ZY1E_AHSI_W94.02_N45.45_20220927_015948_L1A0000508557	Sherburne County_20220927	Sherburne County	45.3792	-93.8958	ZY1E	20220927	2022-09-27 17:31:08	2022-09-27 17:31:08	MN	CST	2022-09-27 11:31:08	6090	09/27/2022	11:31	1052.9	1052.9	955.175	1406.01	0.471991	224.11	3.34	-1	1	0.0382	有羽流
68	ZY1E_AHSI_W94.33_N38.38_20211206_011716_L1A0000374910	La Cygne_20211206	La Cygne	38.3472	-94.6467	ZY1E	20211206	2021-12-06 17:27:03	2021-12-06 17:27:03	KS	CST	2021-12-06 11:27:03	1241	12/06/2021	11:27	365.5	442.9	363.173	506.763	0.395375	71.054	4.78	-1	0.5	0.0289688
69	ZY1E_AHSI_W94.40_N32.17_20210401_008144_L1A0000261751	Martin Lake_20210401	Martin Lake	32.2597	-94.5703	ZY1E	20210401	2021-04-01 17:20:59	2021-04-01 17:20:59	TX	CST	2021-04-01 11:20:59	6146	04/01/2021	11:20	1201.3	1170.4	1080.46	1073.3	0.00662678	179.679	3.06	-1	1	0.0476688	有羽流
70	ZY1E_AHSI_W94.44_N38.38_20210913_010511_L1A0000334632	La Cygne_20210913	La Cygne	38.3472	-94.6467	ZY1E	20210913	2021-09-13 17:27:32	2021-09-13 17:27:32	KS	CST	2021-09-13 11:27:32	1241	09/13/2021	11:27	662.6	671	604.53	700.786	0.159225	85.6868	5.41	-1	0.5	0.0535875
71	ZY1E_AHSI_W94.49_N38.38_20200711_004357_L1A0000107667	La Cygne_20200711	La Cygne	38.3472	-94.6467	ZY1E	20200711	2020-07-11 17:23:19	2020-07-11 17:23:19	KS	CST	2020-07-11 11:23:19	1241	07/11/2020	11:23	1601.4	1598	1451.58	1986.86	0.368755	367.234	2.72	1	1	0.0482563	反演效果不好，只有一团排放；感觉有点像是把水汽也核算进去了，偏高很多；误差太大了
72	ZY1E_AHSI_W94.59_N32.17_20220303_012967_L1A0000414108	Martin Lake_20220303	Martin Lake	32.2597	-94.5703	ZY1E	20220303	2022-03-03 17:22:15	2022-03-03 17:22:15	TX	CST	2022-03-03 11:22:15	6146	03/03/2022	11:22	1866.9	1838.5	1684.18	565.812	0.664043	429.042	0.58	-1	-1	0.0385375	这一景本应该能够看到完美羽流的，但是羽流的方向刚好经过了湖面，导致出现一段非常大的异常高值
73	ZY1E_AHSI_W94.77_N32.17_20210104_006896_L1A0000221658	Martin Lake_20210104	Martin Lake	32.2597	-94.5703	ZY1E	20210104	2021-01-04 17:21:40	2021-01-04 17:21:40	TX	CST	2021-01-04 11:21:40	6146	01/04/2021	11:21	1286	1418.3	1208.65	1686.8	0.395609	460.001	1.96	-1	0.5	0.0420625	水汽干扰大，几乎无反演结果
74	ZY1E_AHSI_W96.19_N31.29_20220130_012507_L1A0000399543	Oak Grove_20220130	Oak Grove	31.185	-96.4853	ZY1E	20220130	2022-01-30 17:28:05	2022-01-30 17:28:05	TX	CST	2022-01-30 11:28:05	6180	01/30/2022	11:28	1396	1398.9	1267.66	1100.82	0.131613	131.342	4.62	-1	1	0.0176562
75	ZY1E_AHSI_W96.23_N31.29_20220326_013296_L1A0000424559	Oak Grove_20220326	Oak Grove	31.185	-96.4853	ZY1E	20220326	2022-03-26 17:27:55	2022-03-26 17:27:55	TX	CST	2022-03-26 11:27:55	6180	03/26/2022	11:27	767.3	835.6	723.965	806.052	0.113385	125.953	3.3	-1	0.7	0.0239313
76	ZY1E_AHSI_W96.26_N31.29_20201006_005607_L1A0000169633	Oak Grove_20201006	Oak Grove	31.185	-96.4853	ZY1E	20201006	2020-10-06 17:25:38	2020-10-06 17:25:38	TX	CST	2020-10-06 11:25:38	6180	10/06/2020	11:25	1874.4	1879.2	1702.24	1637.74	0.0378909	455.598	1.93	-1	1	0.0381625	有排放，无羽流
77	ZY1E_AHSI_W96.28_N31.29_20210424_008474_L1A0000271419	Oak Grove_20210424	Oak Grove	31.185	-96.4853	ZY1E	20210424	2021-04-24 17:27:56	2021-04-24 17:27:56	TX	CST	2021-04-24 11:27:56	6180	04/24/2021	11:27	893.6	900.9	813.64	1392.18	0.711045	135.342	5.95	-1	0.7	0.0259563	偏高
78	ZY1E_AHSI_W96.41_N31.29_20211206_011716_L1A0000374926	Oak Grove_20211206	Oak Grove	31.185	-96.4853	ZY1E	20211206	2021-12-06 17:29:06	2021-12-06 17:29:06	TX	CST	2021-12-06 11:29:06	6180	12/06/2021	11:29	1798.7	1790.1	1627.98	1688.68	0.0372857	147.5	7.76	-1	1	0.0223	有一点点羽流
79	ZY1E_AHSI_W96.55_N29.95_20220130_012507_L1A0000399546	Sam Seymour_20220130	Sam Seymour	29.9172	-96.7506	ZY1E	20220130	2022-01-30 17:28:28	2022-01-30 17:28:28	TX	CST	2022-01-30 11:28:28	6179	01/30/2022	11:28	1394.8	1390.4	1263.48	1088.58	0.138427	194.505	2.83	-1	0.7	0.0215125
80	ZY1E_AHSI_W96.58_N31.29_20200711_004359_L1A0000107694	Oak Grove_20200711	Oak Grove	31.185	-96.4853	ZY1E	20200711	2020-07-11 17:25:19	2020-07-11 17:25:19	TX	CST	2020-07-11 11:25:19	6180	07/11/2020	11:25	1869.6	1875.6	1698.34	1980.98	0.166421	302.557	3.26	1	1	0.0337	羽流可以
81	ZY1E_AHSI_W96.59_N29.95_20220326_013296_L1A0000424562	Sam Seymour_20220326	Sam Seymour	29.9172	-96.7506	ZY1E	20220326	2022-03-26 17:28:17	2022-03-26 17:28:17	TX	CST	2022-03-26 11:28:17	6179	03/26/2022	11:28	1765.4	1773.9	1605.14	1617.15	0.0074827	205.433	3.98	-1	1	0.028925	能看到排放，但羽流飘到了湖面上
82	ZY1E_AHSI_W96.65_N29.95_20210424_008474_L1A0000271422	Sam Seymour_20210424	Sam Seymour	29.9172	-96.7506	ZY1E	20210424	2021-04-24 17:28:19	2021-04-24 17:28:19	TX	CST	2021-04-24 11:28:19	6179	04/24/2021	11:28	1037.5	1164.7	995.055	1189.39	0.195301	112.492	6.15	-1	1	0.0282375
83	ZY1E_AHSI_W96.74_N31.10_20200612_003941_L1A0000093912	Oak Grove_20200612	Oak Grove	31.185	-96.4853	ZY1E	20200612	2020-06-12 17:25:12	2020-06-12 17:25:12	TX	CST	2020-06-12 11:25:12	6180	06/12/2020	11:25	1759.1	1762.5	1597.11	1871.45	0.171767	238.957	4	-1	1	0.0420125	排放羽流很清晰
84	ZY1E_AHSI_W96.95_N29.95_20200711_004359_L1A0000107697	Sam Seymour_20200711	Sam Seymour	29.9172	-96.7506	ZY1E	20200711	2020-07-11 17:25:42	2020-07-11 17:25:42	TX	CST	2020-07-11 11:25:42	6179	07/11/2020	11:25	1793.1	1824.9	1638.69	1563.8	0.0457037	273.503	2.82	-1	1	0.0214937	有羽流，还不错，飘到水面上了，前16波段清晰；作为强吸收和弱吸收的案例
85	ZY1E_AHSI_W97.05_N29.95_20200612_003941_L1A0000093915	Sam Seymour_20200612	Sam Seymour	29.9172	-96.7506	ZY1E	20200612	2020-06-12 17:25:31	2020-06-12 17:25:31	TX	CST	2020-06-12 11:25:31	6179	06/12/2020	11:25	1467.5	1562.8	1367.32	1768.94	0.293733	243.035	3.64	-1	1	0.0363	羽流形状很好，可以作为案例
86	ZY1E_AHSI_W98.07_N29.51_20220930_015991_L1A0000509878	J K Spruce_20220930	J K Spruce	29.3091	-98.3205	ZY1E	20220930	2022-09-30 17:31:53	2022-09-30 17:31:53	TX	CST	2022-09-30 11:31:53	7097	09/30/2022	11:31	1501.1	1499.5	1361.03	1199.12	0.118955	434.204	1.61	-1	1	0.0165812	有噪声，有羽流
87	ZY1E_AHSI_W98.20_N29.06_20220418_013626_L1A0000435959	J K Spruce_20220418	J K Spruce	29.3091	-98.3205	ZY1E	20220418	2022-04-18 17:33:49	2022-04-18 17:33:49	TX	CST	2022-04-18 11:33:49	7097	04/18/2022	11:33	629.1	628.9	570.61	585.382	0.0258885	59.0496	6.44	-1	0.7	0.0264375
88	ZY1E_AHSI_W98.50_N29.51_20200930_005521_L1A0000170469	J K Spruce_20200930	J K Spruce	29.3091	-98.3205	ZY1E	20200930	2020-09-30 17:33:03	2020-09-30 17:33:03	TX	CST	2020-09-30 11:33:03	7097	09/30/2020	11:33	914.9	958.2	851.588	993.261	0.166363	158.001	3.18	-1	1	0.0255
89	ZY1E_AHSI_W98.51_N29.06_20201029_005935_L1A0000194928	J K Spruce_20201029	J K Spruce	29.3091	-98.3205	ZY1E	20201029	2020-10-29 17:33:12	2020-10-29 17:33:12	TX	CST	2020-10-29 11:33:12	7097	10/29/2020	11:33	508.1	564.9	489.281	581.998	0.189496	58.3041	7.17	1	0.7	0.0196125	有团块排放
90	ZY1E_AHSI_W98.53_N29.51_20220514_013997_L1A0000447750	J K Spruce_20220514	J K Spruce	29.3091	-98.3205	ZY1E	20220514	2022-05-14 17:35:16	2022-05-14 17:35:16	TX	CST	2022-05-14 11:35:16	7097	05/14/2022	11:35	1041	1035.2	941.31	1544.21	0.640487	376.863	2.12	1	1	0.0247125
91	ZY1F_AHSI_W101.04_N41.04_20230916_009032_L1A0000537816	Gerald Gentleman Station_20230916	Gerald Gentleman Station	41.0808	-101.141	ZY1F	20230916	2023-09-16 18:00:26	2023-09-16 18:00:26	NE	CST	2023-09-16 12:00:26	6077	09/16/2023	12:00	1330.8	1109.2	1207.28	1459.97	0.209307	185.926	3.96	1	0.7	0.0239625
92	ZY1F_AHSI_W101.05_N41.04_20231110_009821_L1A0000582861	Gerald Gentleman Station_20231110	Gerald Gentleman Station	41.0808	-101.141	ZY1F	20231110	2023-11-10 18:01:07	2023-11-10 18:01:07	NE	CST	2023-11-10 12:01:07	6077	11/10/2023	12:01	1304.1	1307.4	1183.11	1232.6	0.041833	132.222	4.88	-1	0.7	0.0092
93	ZY1F_AHSI_W101.48_N41.04_20230624_007827_L1A0000469131	Gerald Gentleman Station_20230624	Gerald Gentleman Station	41.0808	-101.141	ZY1F	20230624	2023-06-24 18:00:53	2023-06-24 18:00:53	NE	CST	2023-06-24 12:00:53	6077	06/24/2023	12:00	688	687.2	624.143	571.811	0.0838457	49.1	7.6	-1	1	0.026325	10波段效果好
94	ZY1F_AHSI_W104.83_N41.92_20230930_009233_L1A0000549577	Laramie River_20230930	Laramie River	42.1103	-104.883	ZY1F	20230930	2023-09-30 18:16:43	2023-09-30 18:16:43	WY	MST	2023-09-30 11:16:43	6204	09/30/2023	11:16	798.9	661.1	691.414	778.71	0.126257	114.854	3.4	-1	1	0.0346875	有羽流
95	ZY1F_AHSI_W107.55_N40.59_20231020_009525_L1A0000564874	Craig_20231020	Craig	40.4627	-107.591	ZY1F	20231020	2023-10-20 18:26:24	2023-10-20 18:26:24	CO	MST	2023-10-20 11:26:24	6021	10/20/2023	11:26	729.3	742.5	666.799	35.358	0.946974	36.0968	0.42	-1	0.5	0.0521312	22有一个羽流 24双羽流0.001
96	ZY1F_AHSI_W110.71_N39.27_20230817_008602_L1A0000512937	Hunter_20230817	Hunter	39.1747	-111.029	ZY1F	20230817	2023-08-17 18:36:51	2023-08-17 18:36:51	UT	MST	2023-08-17 11:36:51	6165	08/17/2023	11:36	654	651.7	592.047	687.146	0.160628	173.681	2.06	1	1	0.001525
97	ZY1F_AHSI_W110.73_N39.27_20230623_007813_L1A0000468861	Hunter_20230623	Hunter	39.1747	-111.029	ZY1F	20230623	2023-06-23 18:36:03	2023-06-23 18:36:03	UT	MST	2023-06-23 11:36:03	6165	06/23/2023	11:36	422.6	419.8	381.852	485.722	0.272015	46.5371	6.19	-1	0.7	0.0039625	有点不像
98	ZY1F_AHSI_W111.15_N39.27_20230719_008186_L1A0000490264	Hunter_20230719	Hunter	39.1747	-111.029	ZY1F	20230719	2023-07-19 18:38:10	2023-07-19 18:38:10	UT	MST	2023-07-19 11:38:10	6165	07/19/2023	11:38	656.412	749.552	649.001	151.541	0.766501	129.724	0.5	1	-1	0.00094375	清晰完美
99	ZY1F_AHSI_W80.08_N39.27_20220621_002553_L1A0000190867	Harrison Power Station_20220621	Harrison Power Station	39.3844	-80.3325	ZY1F	20220621	2022-06-21 16:24:44	2022-06-21 16:24:44	WV	EST	2022-06-21 11:24:44	3944	06/21/2022	11:24	1900.6	2008.4	1763.31	1450.12	0.177617	316.608	2.33	1	1	0.0493	非常清晰
100	ZY1F_AHSI_W80.61_N39.27_20230418_006865_L1A0000414746	Harrison Power Station_20230418	Harrison Power Station	39.3844	-80.3325	ZY1F	20230418	2023-04-18 16:34:27	2023-04-18 16:34:27	WV	EST	2023-04-18 11:34:27	3944	04/18/2023	11:34	631.6	618	565.987	495.553	0.124443	53.1873	5.73	-1	1	0.0309187
101	ZY1F_AHSI_W86.57_N36.17_20230305_006234_L1A0000379047	Gallatin_20230305	Gallatin	36.3156	-86.4006	ZY1F	20230305	2023-03-05 16:54:32	2023-03-05 16:54:32	TN	CST	2023-03-05 10:54:32	3403	03/05/2023	10:54	278.3	276	250.592	350.731	0.399613	76.3399	2.5	-1	0	0.0292313	无排放
102	ZY1F_AHSI_W88.63_N37.05_20231031_009677_L1A0000574307	Shawnee_20231031	Shawnee	37.1517	-88.775	ZY1F	20231031	2023-10-31 17:07:20	2023-10-31 17:07:20	KY	CST	2023-10-31 11:07:20	1379	10/31/2023	11:07	879.1	888.799	798.533	1463.34	0.832536	207.459	3.6	-1	0.5	0.0614625	羽流飘到了水面上，水汽干扰大
103	ZY1F_AHSI_W90.79_N38.83_20230704_007970_L1A0000476992	Labadie_20230704	Labadie	38.5583	-90.8361	ZY1F	20230704	2023-07-04 17:16:01	2023-07-04 17:16:01	MO	CST	2023-07-04 11:16:01	2103	07/04/2023	11:16	2560.7	2558.1	2322.4	2606.44	0.122305	542.706	2.41	1	1	0.0230375	构成羽流，有排放
104	ZY1F_AHSI_W90.93_N38.38_20231022_009549_L1A0000565683	Labadie_20231022	Labadie	38.5583	-90.8361	ZY1F	20231022	2023-10-22 17:17:43	2023-10-22 17:17:43	MO	CST	2023-10-22 11:17:43	2103	10/22/2023	11:17	2197.7	2194	1992.77	2016.96	0.0121401	562.965	1.92	-1	0.7	0.050625	受江水影响较大
105	ZY1F_AHSI_W93.93_N45.45_20220721_002978_L1A0000173921	Sherburne County_20220721	Sherburne County	45.3792	-93.8958	ZY1F	20220721	2022-07-21 17:27:56	2022-07-21 17:27:56	MN	CST	2022-07-21 11:27:56	6090	07/21/2022	11:27	2400.9	2419.9	2185.82	2244.75	0.0269634	212.893	5.9	1	1	0.0392562	适合作为反演案例
106	ZY1F_AHSI_W94.55_N32.17_20231210_010251_L1A0000608285	Martin Lake_20231210	Martin Lake	32.2597	-94.5703	ZY1F	20231210	2023-12-10 17:27:08	2023-12-10 17:27:08	TX	CST	2023-12-10 11:27:08	6146	12/10/2023	11:27	1027.6	1026.4	931.733	1001.33	0.0747012	118.382	4.79	-1	1	0.0414062	有羽流
107	ZY1F_AHSI_W94.55_N38.38_20220920_003853_L1A0000229994	La Cygne_20220920	La Cygne	38.3472	-94.6467	ZY1F	20220920	2022-09-20 17:24:31	2022-09-20 17:24:31	KS	CST	2022-09-20 11:24:31	1241	09/20/2022	11:24	759.1	765.6	691.003	799.936	0.157646	91.0481	5.01	-1	0.7	0.0331125	水汽影响太大了
108	ZY1F_AHSI_W94.56_N38.38_20230816_008587_L1A0000512042	La Cygne_20230816	La Cygne	38.3472	-94.6467	ZY1F	20230816	2023-08-16 17:31:23	2023-08-16 17:31:23	KS	CST	2023-08-16 11:31:23	1241	08/16/2023	11:31	1273.7	1441.1	1233.94	1002.18	0.187827	180.571	2.8	1	0.7	0.049475	飘到湖面上了
109	ZY1F_AHSI_W94.57_N32.17_20220802_003150_L1A0000184740	Martin Lake_20220802	Martin Lake	32.2597	-94.5703	ZY1F	20220802	2022-08-02 17:17:29	2022-08-02 17:17:29	TX	CST	2022-08-02 11:17:29	6146	08/02/2022	11:17	2263.6	2623.6	2146.04	2287.43	0.0658858	334.214	3.39	-1	0.7	0.0445625	有排放，圆形，堆叠状，飘到湖面上
110	ZY1F_AHSI_W94.58_N38.38_20230108_005431_L1A0000329362	La Cygne_20230108	La Cygne	38.3472	-94.6467	ZY1F	20230108	2023-01-08 17:27:27	2023-01-08 17:27:27	KS	CST	2023-01-08 11:27:27	1241	01/08/2023	11:27	1406.5	1398.2	1272.57	1093.95	0.14036	484.674	1.2	1	0.7	0.0117938	噪声较大
111	ZY1F_AHSI_W94.61_N32.17_20221120_004728_L1A0000290523	Martin Lake_20221120	Martin Lake	32.2597	-94.5703	ZY1F	20221120	2022-11-20 17:20:45	2022-11-20 17:20:45	TX	CST	2022-11-20 11:20:45	6146	11/20/2022	11:20	2635.2	2664.4	2399.44	2442.43	0.0179158	408.805	2.97	-1	1	0.0436	有一点羽流比较稀疏
112	ZY1F_AHSI_W96.64_N31.29_20220727_003064_L1A0000178119	Oak Grove_20220727	Oak Grove	31.185	-96.4853	ZY1F	20220727	2022-07-27 17:24:51	2022-07-27 17:24:51	TX	CST	2022-07-27 11:24:51	6180	07/27/2022	11:24	1241	1493.7	1217.51	1153.68	0.0524317	152.72	3.79	1	1	0.0259875
113	ZY1F_AHSI_W96.65_N31.29_20230304_006220_L1A0000378222	Oak Grove_20230304	Oak Grove	31.185	-96.4853	ZY1F	20230304	2023-03-04 17:30:35	2023-03-04 17:30:35	TX	CST	2023-03-04 11:30:35	6180	03/04/2023	11:30	650.4	654.3	591.802	631.343	0.0668143	88.0767	3.8	-1	1	0.0314875	被云挡住了
114	ZY1F_AHSI_W96.65_N31.29_20230816_008587_L1A0000512058	Oak Grove_20230816	Oak Grove	31.185	-96.4853	ZY1F	20230816	2023-08-16 17:33:23	2023-08-16 17:33:23	TX	CST	2023-08-16 11:33:23	6180	08/16/2023	11:33	1820.5	1806.6	1644.59	2238.58	0.361174	423.291	2.6	1	1	0.0237813	羽流很好，简直完美！！！适合作为案例
115	ZY1F_AHSI_W96.67_N31.29_20230108_005431_L1A0000329378	Oak Grove_20230108	Oak Grove	31.185	-96.4853	ZY1F	20230108	2023-01-08 17:29:27	2023-01-08 17:29:27	TX	CST	2023-01-08 11:29:27	6180	01/08/2023	11:29	1957.3	1974.5	1783.17	1621.75	0.0905292	189.987	4.4	1	1	0.0252813	有羽流，水池下方有一个点源
116	ZY1F_AHSI_W97.01_N29.95_20230304_006220_L1A0000378225	Sam Seymour_20230304	Sam Seymour	29.9172	-96.7506	ZY1F	20230304	2023-03-04 17:30:57	2023-03-04 17:30:57	TX	CST	2023-03-04 11:30:57	6179	03/04/2023	11:30	672.8	881.2	704.883	1403	0.990397	230.841	3.01	1	1	0.028625
117	ZY1F_AHSI_W97.01_N29.95_20230816_008587_L1A0000512061	Sam Seymour_20230816	Sam Seymour	29.9172	-96.7506	ZY1F	20230816	2023-08-16 17:33:45	2023-08-16 17:33:45	TX	CST	2023-08-16 11:33:45	6179	08/16/2023	11:33	1354.8	1363.7	1233.49	1321.65	0.0714664	279.662	2.37	1	1	0.0234313
118	ZY1F_AHSI_W98.47_N29.51_20221013_004183_L1A0000250381	J K Spruce_20221013	J K Spruce	29.3091	-98.3205	ZY1F	20221013	2022-10-13 17:33:02	2022-10-13 17:33:02	TX	CST	2022-10-13 11:33:02	7097	10/13/2022	11:33	1492.3	1495.9	1355.59	1889.53	0.393886	178.431	5.76	-1	0.7	0.0210313	噪声较大

## Sheet: 按设施统计
排放	(多项)
行标签	计数项:排放	平均值项:反演结果	平均值项:不确定度	平均值项:avg Q(ton/h)	标准偏差项:avg Q(ton/h)		Facility Name	No. of quantitative images	No. of emission images	No. of clear-sky images	Estimated Intensity	EPA inventory(t/h)	Inversion Error			Facility Name	No. of quantitative images	No. of emission images	No. of clear-sky images	Estimated Intensity	平均值项:不确定度	EPA inventory(t/h)	反演误差
Antelope Valley	2	701.709	78.0648	620.607	160.289		Antelope Valley	2	2	4	702±78	620.607	0.130681			Antelope Valley	2	2	4	701.709	78.0648	620.607	0.130681		702±78
Craig	6	722.554	207.054	771.713	258.618		Craig	5	6	6	860±241	771.713	0.0848974			Craig	5	6	6	859.994	241.295	792.696	0.0848974		860±241
Four Corners Steam Elec Station	6	717.937	169.449	1078.3	376.047		Four Corners Steam Elec Station	6	6	6	718±169	1078.3	-0.334197			Four Corners Steam Elec Station	6	6	6	717.937	169.449	1078.3	-0.334197		718±169
Gallatin	1	885.581	348.084	692.586	#DIV/0!		Gallatin	1	1	3	886±348	692.586	0.278659			Gallatin	1	1	3	885.581	348.084	692.586	0.278659		886±348
Gerald Gentleman Station	6	1016.83	119.424	1096.23	233.455		Gerald Gentleman Station	5	6	6	1160±127	1096.23	0.0778357			Gerald Gentleman Station	5	6	6	1160.06	127.2	1076.29	0.0778357		1160±127
Harrington Station	1	604.156	61.1049	579.709	#DIV/0!		Harrington Station	1	1	3	604±61	579.709	0.04217			Harrington Station	1	1	3	604.156	61.1049	579.709	0.04217		604±61
Harrison Power Station	3	726.187	172.322	845.768	814.527		Harrison Power Station	2	3	3	973±183	845.768	-0.164696			Harrison Power Station	2	3	3	972.836	183.381	1164.65	-0.164696		973±183
Hunter	8	481.008	162.471	656.678	244.905		Hunter	5	8	8	640±175	656.678	0.0744527			Hunter	5	8	8	639.58	174.663	595.261	0.0744527		640±175
J K Spruce	7	1128.49	231.551	977.435	364.745		J K Spruce	7	7	7	1128±232	977.435	0.154543			J K Spruce	7	7	7	1128.49	231.551	977.435	0.154543		1128±232
Jim Bridger	6	938.146	104.719	1166.64	438.514		Jim Bridger	6	6	7	938±105	1166.64	-0.195857			Jim Bridger	6	6	7	938.146	104.719	1166.64	-0.195857		938±105
La Cygne	7	949.105	196.675	894.401	416.142		La Cygne	5	7	7	1087±245	894.401	0.0270318			La Cygne	5	7	7	1087.24	245.487	1058.62	0.0270318		1087±245
Labadie	5	1972.84	526.552	1960.71	329.301		Labadie	5	5	5	1973±527	1960.71	0.00618528			Labadie	5	5	5	1972.84	526.552	1960.71	0.00618528		1973±527
Laramie River	4	965.056	132.419	908.563	451.68		Laramie River	4	4	4	965±132	908.563	0.0621779			Laramie River	4	4	4	965.056	132.419	908.563	0.0621779		965±132
Martin Lake	9	1557.51	302.321	1621.81	578.835		Martin Lake	6	9	9	1848±294	1621.81	0.0697906			Martin Lake	6	9	9	1848.43	294.123	1727.84	0.0697906		1848±294
Oak Grove	12	1472.68	246.325	1357.86	427.739		Oak Grove	12	12	12	1473±246	1357.86	0.0845614			Oak Grove	12	12	12	1472.68	246.325	1357.86	0.0845614		1473±246
Sam Seymour	8	1413.71	223.013	1210.83	333.65		Sam Seymour	8	8	8	1414±223	1210.83	0.167554			Sam Seymour	8	8	8	1413.71	223.013	1210.83	0.167554		1414±223
Shawnee	6	935.55	206.026	775.319	249.235		Shawnee	2	6	7	916±256	775.319	-0.0492687			Shawnee	2	6	7	915.793	255.883	963.252	-0.0492687		916±256
Sherburne County	4	1395.98	217.792	1191.34	756.575		Sherburne County	4	4	4	1396±218	1191.34	0.171778			Sherburne County	4	4	4	1395.98	217.792	1191.34	0.171778		1396±218
Trimble County	3	1167.75	393.634	827.89	516.555		Trimble County	2	3	4	1141±492	827.89	0.0246889			Trimble County	2	3	4	1140.98	491.957	1113.49	0.0246889		1141±492
White Bluff	5	753.219	171.266	634.558	445.089		White Bluff	3	5	5	720±186	634.558	-0.176943			White Bluff	3	5	5	719.878	186.228	874.639	-0.176943		720±186
总计	109	1091.98	217.903	1074.98	514.577		Total	91	109	118	1177±228	1074.98	0.0284895			总计	91	109	118	1176.52	227.845	1143.93	0.0284895		1177±228
总数量
行标签	计数项:排放	平均值项:反演结果	标准偏差项:反演结果	平均值项:avg Q(ton/h)	标准偏差项:avg Q(ton/h)
Antelope Valley	4	1056.4	495.356	514.946	163.94
Craig	6	722.554	410.888	771.713	258.618
Four Corners Steam Elec Station	6	717.937	274.393	1078.3	376.047
Gallatin	3	478.498	360.596	407.073	247.641
Gerald Gentleman Station	6	1016.83	494.233	1096.23	233.455
Harrington Station	3	503.474	366.373	335.362	218.285
Harrison Power Station	3	726.187	640.552	845.768	814.527
Hunter	8	481.008	311.235	656.678	244.905
J K Spruce	7	1128.49	477.74	977.435	364.745
Jim Bridger	7	846.681	354.038	1059.5	490.506
La Cygne	7	949.105	506.13	894.401	416.142
Labadie	5	1972.84	419.324	1960.71	329.301
Laramie River	4	965.056	429.989	908.563	451.68
Martin Lake	9	1557.51	769.071	1621.81	578.835
Oak Grove	12	1472.68	477.178	1357.86	427.739
Sam Seymour	8	1413.71	226.124	1210.83	333.65
Shawnee	7	907.014	336.758	714.699	278.368
Sherburne County	4	1395.98	662.068	1191.34	756.575
Trimble County	4	948.574	473.586	713.848	479.487
White Bluff	5	753.219	269.306	634.558	445.089
总计	118	1056.18	570.475	1017.68	534.009
定量的数量（0.7、1）
行标签	计数项:排放	平均值项:反演结果	平均值项:不确定度	平均值项:avg Q(ton/h)	标准偏差项:avg Q(ton/h)
Antelope Valley	2	701.709	78.0648	620.607	160.289
Craig	5	859.994	241.295	792.696	283.376
Four Corners Steam Elec Station	6	717.937	169.449	1078.3	376.047
Gallatin	1	885.581	348.084	692.586	#DIV/0!
Gerald Gentleman Station	5	1160.06	127.2	1076.29	255.23
Harrington Station	1	604.156	61.1049	579.709	#DIV/0!
Harrison Power Station	2	972.836	183.381	1164.65	846.638
Hunter	5	639.58	174.663	595.261	296.33
J K Spruce	7	1128.49	231.551	977.435	364.745
Jim Bridger	6	938.146	104.719	1166.64	438.514
La Cygne	5	1087.24	245.487	1058.62	366.734
Labadie	5	1972.84	526.552	1960.71	329.301
Laramie River	4	965.056	132.419	908.563	451.68
Martin Lake	6	1848.43	294.123	1727.84	686.568
Oak Grove	12	1472.68	246.325	1357.86	427.739
Sam Seymour	8	1413.71	223.013	1210.83	333.65
Shawnee	2	915.793	255.883	963.252	256.512
Sherburne County	4	1395.98	217.792	1191.34	756.575
Trimble County	2	1140.98	491.957	1113.49	210.369
White Bluff	3	719.878	186.228	874.639	423.847
总计	91	1176.52	227.845	1143.93	505.722
探测到的数量（0.5、0.7、1）
行标签	计数项:排放	平均值项:反演结果	平均值项:不确定度	平均值项:avg Q(ton/h)	标准偏差项:avg Q(ton/h)
Antelope Valley	2	701.709	78.0648	620.607	160.289
Craig	6	722.554	207.054	771.713	258.618
Four Corners Steam Elec Station	6	717.937	169.449	1078.3	376.047
Gallatin	1	885.581	348.084	692.586	#DIV/0!
Gerald Gentleman Station	6	1016.83	119.424	1096.23	233.455
Harrington Station	1	604.156	61.1049	579.709	#DIV/0!
Harrison Power Station	3	726.187	172.322	845.768	814.527
Hunter	8	481.008	162.471	656.678	244.905
J K Spruce	7	1128.49	231.551	977.435	364.745
Jim Bridger	6	938.146	104.719	1166.64	438.514
La Cygne	7	949.105	196.675	894.401	416.142
Labadie	5	1972.84	526.552	1960.71	329.301
Laramie River	4	965.056	132.419	908.563	451.68
Martin Lake	9	1557.51	302.321	1621.81	578.835
Oak Grove	12	1472.68	246.325	1357.86	427.739
Sam Seymour	8	1413.71	223.013	1210.83	333.65
Shawnee	6	935.55	206.026	775.319	249.235
Sherburne County	4	1395.98	217.792	1191.34	756.575
Trimble County	3	1167.75	393.634	827.89	516.555
White Bluff	5	753.219	171.266	634.558	445.089
总计	109	1091.98	217.903	1074.98	514.577

## Sheet: 数据定义
定义：
	排放	说明	Clarification	Class	Num
	1	高置信度	High Confidence	HC	62
	0.7	中置信度	Medium Confidence	MC	29
	0.5	低置信度	Low Confidence	LC	15
	0	未探测到	Not Detected	NE	9
	-1	无法量化	Low Wind Speed	UQ	3
									排放	1
	行标签	计数项:排放
	1	62							行标签	平均值项:反演结果	平均值项:不确定度	平均值项:反演误差		行标签	平均值项:反演结果	平均值项:不确定度	平均值项:反演误差
	0.7	29							Antelope Valley	717.096	82.74	0.309611		Sherburne	2590.27	241.855	0.185037
	0.5	15							Craig	933.74	201.286	0.0263656		Labadie	1872.9	416.75	0.170478
	0	9							Four Corners Steam Elec Station	790.577	206.506	0.327876		Martin Lake	1763.65	288.593	0.107372
	-1	3							Gerald Gentleman Station	689.343	68.0938	0.197378		Oak Grove	1579.14	270.547	0.225204
	总计	118							Harrington Station	607.872	61.6422	0.0485812		La Cygne	1482.35	276.942	0.300313
									Harrison Power Station	1112.48	207.471	0.0575348		Sam Seymour	1223.57	196.707	0.134518
									Hunter	530.989	133.062	0.113641		J K Spruce	1130.27	243.695	0.185692
									J K Spruce	1130.27	243.695	0.185692		Harrison	1112.48	207.471	0.0575348
									Jim Bridger	964.415	103.253	0.123887		Trimble	1059.42	448.611	0.267708
									La Cygne	1482.35	276.942	0.300313		Jim Bridger	964.415	103.253	0.123887
									Labadie	1872.9	416.75	0.170478		Craig	933.74	201.286	0.0263656
									Laramie River	925.902	130.031	0.0893852		Laramie River	925.902	130.031	0.0893852
									Martin Lake	1763.65	288.593	0.107372		Shawnee	924.211	252.092	0.0393591
									Oak Grove	1579.14	270.547	0.225204		Four Corners	790.577	206.506	0.327876
									Sam Seymour	1223.57	196.707	0.134518		Antelope Valley	717.096	82.74	0.309611
									Shawnee	924.211	252.092	0.0393591		White Bluff	701.817	202.87	0.190377
									Sherburne County	2590.27	241.855	0.185037		Gerald Gentleman	689.343	68.0938	0.197378
									Trimble County	1059.42	448.611	0.267708		Harrington	607.872	61.6422	0.0485812
									White Bluff	701.817	202.87	0.190377		Hunter	530.989	133.062	0.113641
									总计	1202.5	224.939	0.173942		总计	1202.5	224.939	0.173942

## Sheet: 2024.11 (2)
序号	filename	foldername	Facility Name	Latitude	Longitude	satellite	date	Time of Satellite	UTC	State	Zone	Local Standard Time	Facility ID	day LST	time	前整点Q	后整点Q	avg Q(ton/h)	反演结果	反演误差	不确定度	风速	提取	排放	背景	备注
1	GF5_AHSI_W107.84_N40.19_20190803_006569_L10000052859	Craig_20190802	Craig	40.4627	-107.591	GF5	20190803	2019-08-03 04:08:09	2019-08-02 20:08:09	CO	MST	2019-08-02 13:08:09	6021	08/02/2019	13:08	1356.3	1381	1233.4	1240.2	0.00550781	189.226	3.26	-1	1
2	GF5_AHSI_W111.09_N39.21_20191118_008126_L10000065664	Hunter_20191118	Hunter	39.1747	-111.029	GF5	20191118	2019-11-18 04:20:29	2019-11-17 20:20:29	UT	MST	2019-11-17 13:20:29	6165	11/17/2019	13:20	889	885.7	805.489	930.248	0.154886	500.096	0.91	1	0
3	GF5_AHSI_W85.14_N38.72_20191225_008664_L10000068784	Trimble County_20191225	Trimble County	38.5847	-85.4117	GF5	20191225	2019-12-25 02:36:43	2019-12-24 18:36:43	KY	EST	2019-12-24 13:36:43	6071	12/24/2019	13:36	1037.4	1080.8	964.737	625.119	0.352031	305.67	1.06	-1	1
4	GF5A_AHSI_W108.6_N36.7_20231227_005597_L10000078715	Four Corners Steam Elec Station_20231227	Four Corners Steam Elec Station	36.69	-108.481	GF5A	20231227	2023-12-27 20:12:59	2023-12-27 20:12:59	NM	MST	2023-12-27 13:12:59	2442	12/27/2023	13:12	797	796.8	722.99	634.004	0.12308	81.8135	4.38	-1	0.5
5	GF5A_AHSI_W108.7_N41.7_20231213_005393_L10000074107	Jim Bridger_20231213	Jim Bridger	41.7378	-108.787	GF5A	20231213	2023-12-13 20:08:54	2023-12-13 20:08:54	WY	MST	2023-12-13 13:08:54	8066	12/13/2023	13:08	1825.9	1677	1638.42	1155.39	0.294815	157.108	4	-1	1
6	GF5A_AHSI_W108.8_N41.7_20230923_004213_L10000054221	Jim Bridger_20230923	Jim Bridger	41.7378	-108.787	GF5A	20230923	2023-09-23 20:11:46	2023-09-23 20:11:46	WY	MST	2023-09-23 13:11:46	8066	09/23/2023	13:11	460.9	452.2	416.674	173.106	0.584553	18.4836	7.1	-1	0.5
7	GF5A_AHSI_W94.3_N32.3_20230908_003994_L10000051261	Martin Lake_20230908	Martin Lake	32.2597	-94.5703	GF5A	20230908	2023-09-08 19:22:37	2023-09-08 19:22:37	TX	CST	2023-09-08 13:22:37	6146	09/08/2023	13:22	2712.1	2709.3	2459.44	2728.96	0.109585	383.128	3.48	-1	1		有羽流、但周围水汽干扰也很大
8	GF5A_AHSI_W98.5_N29.3_20230814_003630_L10000044804	J K Spruce_20230814	J K Spruce	29.3091	-98.3205	GF5A	20230814	2023-08-14 19:42:15	2023-08-14 19:42:15	TX	CST	2023-08-14 13:42:15	7097	08/14/2023	13:42	1389.2	1408.7	1272.64	1259.84	0.0100611	415.913	1.7	1	1		完美
9	GF5B_AHSI_W100.9_N41.2_20220628_004292_L10000156032	Gerald Gentleman Station_20220628	Gerald Gentleman Station	41.0808	-101.141	GF5B	20220628	2022-06-29 01:41:40	2022-06-28 17:41:40	NE	CST	2022-06-28 11:41:40	6077	06/28/2022	11:41	1314.5	1320.1	1195.97	394.551	0.670099	105.101	2	1	0.5		24波段可见排放，有排放，但是算不准，靠近湖边
10	GF5B_AHSI_W101.1_N41.2_20211220_001524_L10000044164	Gerald Gentleman Station_20211220	Gerald Gentleman Station	41.0808	-101.141	GF5B	20211220	2021-12-21 01:37:21	2021-12-20 17:37:21	NE	CST	2021-12-20 11:37:21	6077	12/20/2021	11:37	1201.3	1283	1135.51	838.569	0.261502	109.26	4.12	1	0.5
11	GF5B_AHSI_W101.6_N47.5_20220619_004161_L10000151101	Antelope Valley_20220619	Antelope Valley	47.371	-101.836	GF5B	20220619	2022-06-20 01:51:31	2022-06-19 17:51:31	ND	CST	2022-06-19 11:51:31	6469	06/19/2022	11:51	522.7	565.6	507.266	771.871	0.521629	93.5667	4.53	1	1
12	GF5B_AHSI_W101.9_N35.3_20220424_003345_L10000118254	Harrington Station_20220424	Harrington Station	35.2972	-101.748	GF5B	20220424	2022-04-25 01:38:35	2022-04-24 17:38:35	TX	CST	2022-04-24 11:38:35	6193	04/24/2022	11:38	296.2	292.8	266.755	126.057	0.527443	15.6878	6.66	-1	0
13	GF5B_AHSI_W102.0_N47.5_20220316_002777_L10000118963	Antelope Valley_20220316	Antelope Valley	47.371	-101.836	GF5B	20220316	2022-03-17 01:50:55	2022-03-16 17:50:55	ND	CST	2022-03-16 11:50:55	6469	03/16/2022	11:50	560.6	524.1	480.974	453.182	0.057784	50.9313	9.18	-1	0
14	GF5B_AHSI_W102.1_N47.5_20220626_004263_L10000154923	Antelope Valley_20220626	Antelope Valley	47.371	-101.836	GF5B	20220626	2022-06-27 01:53:27	2022-06-26 17:53:27	ND	CST	2022-06-26 11:53:27	6469	06/26/2022	11:53	667	827.8	733.949	662.321	0.0975922	71.9132	6.59	-1	1		能看见一点
15	GF5B_AHSI_W107.5_N40.2_20230926_010921_L10000396892	Craig_20230926	Craig	40.4627	-107.591	GF5B	20230926	2023-09-27 02:12:39	2023-09-26 18:12:39	CO	MST	2023-09-26 11:12:39	6021	09/26/2023	11:12	761.2	909.1	717.384	658.636	0.081892	309.624	1.1	-1	0.5
16	GF5B_AHSI_W107.8_N40.7_20221018_005924_L10000222668	Craig_20221018	Craig	40.4627	-107.591	GF5B	20221018	2022-10-19 02:11:02	2022-10-18 18:11:02	CO	MST	2022-10-18 11:11:02	6021	10/18/2022	11:11	830.6	831.6	753.674	780.247	0.0352578	275.998	1.63	-1	1		两个源
17	GF5B_AHSI_W108.2_N36.7_20220610_004030_L10000145798	Four Corners Steam Elec Station_20220610	Four Corners Steam Elec Station	36.69	-108.481	GF5B	20220610	2022-06-11 02:06:07	2022-06-10 18:06:07	NM	MST	2022-06-10 11:06:07	2442	06/10/2022	11:06	1471.5	1052.86	1296.94	1103.88	0.148859	181.479	2.97	1	1		完美
18	GF5B_AHSI_W108.3_N36.7_20220420_003287_L10000117219	Four Corners Steam Elec Station_20220420	Four Corners Steam Elec Station	36.69	-108.481	GF5B	20220420	2022-04-21 02:05:10	2022-04-20 18:05:10	NM	MST	2022-04-20 11:05:10	2442	04/20/2022	11:05	539.3	621.1	495.429	279.492	0.435859	62.7077	2.3	-1	1		有排放
19	GF5B_AHSI_W108.3_N36.7_20240106_012407_L10000448627	Four Corners Steam Elec Station_20240106	Four Corners Steam Elec Station	36.69	-108.481	GF5B	20240106	2024-01-07 02:12:33	2024-01-06 18:12:33	NM	MST	2024-01-06 11:12:33	2442	01/06/2024	11:12	1357.4	1191	1201.22	745.875	0.379069	316.311	1.32	1	1
20	GF5B_AHSI_W108.8_N41.7_20220212_002311_L10000077220	Jim Bridger_20220212	Jim Bridger	41.7378	-108.787	GF5B	20220212	2022-02-13 02:10:06	2022-02-12 18:10:06	WY	MST	2022-02-12 11:10:06	8066	02/12/2022	11:10	580.1	545	520.951	469.027	0.099671	57.1509	4.49	-1	1		有排放，但周围噪声明显更大，不适合反演
21	GF5B_AHSI_W109.0_N41.6_20231031_011431_L10000413197	Jim Bridger_20231031	Jim Bridger	41.7378	-108.787	GF5B	20231031	2023-11-01 02:20:04	2023-10-31 18:20:04	WY	MST	2023-10-31 11:20:04	8066	10/31/2023	11:20	1208.8	1174.8	1086.32	993.15	0.0857695	94.3495	6.01	-1	1
22	GF5B_AHSI_W109.1_N41.6_20231221_012174_L10000440228	Jim Bridger_20231221	Jim Bridger	41.7378	-108.787	GF5B	20231221	2023-12-22 02:20:37	2023-12-21 18:20:37	WY	MST	2023-12-21 11:20:37	8066	12/21/2023	11:20	994.7	868	864.063	831.36	0.0378486	138.932	3.18	1	0.5
23	GF5B_AHSI_W110.9_N39.2_20220418_003258_L10000114473	Hunter_20220418	Hunter	39.1747	-111.029	GF5B	20220418	2022-04-19 02:17:59	2022-04-18 18:17:59	UT	MST	2022-04-18 11:17:59	6165	04/18/2022	11:17	909.6	899.7	822.631	143.343	0.82575	106.204	0.6	1	2		低风速
24	GF5B_AHSI_W110.9_N39.2_20240104_012378_L10000447404	Hunter_20240104	Hunter	39.1747	-111.029	GF5B	20240104	2024-01-05 02:25:25	2024-01-04 18:25:25	UT	MST	2024-01-04 11:25:25	6165	01/04/2024	11:25	353.2	352.6	320.191	127.018	0.603304	95.6772	0.6	1	2
25	GF5B_AHSI_W80.4_N39.2_20231012_011153_L10000404427	Harrison Power Station_20231012	Harrison Power Station	39.3844	-80.3325	GF5B	20231012	2023-10-13 00:23:33	2023-10-12 16:23:33	WV	EST	2023-10-12 11:23:33	3944	10/12/2023	11:23	229.9	228.3	208.005	522.51	1.512	333.856	0.73	1	0.5		伪排放
26	GF5B_AHSI_W85.2_N38.7_20231031_011430_L10000413176	Trimble County_20231031	Trimble County	38.5847	-85.4117	GF5B	20231031	2023-11-01 00:42:01	2023-10-31 16:42:01	KY	EST	2023-10-31 11:42:01	6071	10/31/2023	11:42	278.2	284.99	256.691	1263.58	3.9226	204.154	3.2	-1	0.5		探测到了，但算的不准（该案例说明GF5的探测下限达到256t/h, 3m/s）
27	GF5B_AHSI_W85.3_N38.7_20230714_009842_L10000360353	Trimble County_20230714	Trimble County	38.5847	-85.4117	GF5B	20230714	2023-07-15 00:42:09	2023-07-14 16:42:09	KY	EST	2023-07-14 11:42:09	6071	07/14/2023	11:42	1373.5	1399.05	1262.24	1493.72	0.183384	591.552	1.52	1	1
28	GF5B_AHSI_W88.6_N37.1_20231212_012042_L10000435322	Shawnee_20231212	Shawnee	37.1517	-88.775	GF5B	20231212	2023-12-13 00:54:21	2023-12-12 16:54:21	KY	CST	2023-12-12 10:54:21	1379	12/12/2023	10:54	943.299	928	843.255	621.081	0.263472	201.366	1.77	-1	0.5		羽流飘到了水面上，水汽干扰大
29	GF5B_AHSI_W88.6_N37.2_20220326_002922_L10000100107	Shawnee_20220326	Shawnee	37.1517	-88.775	GF5B	20220326	2022-03-27 00:46:28	2022-03-26 16:46:28	KY	CST	2022-03-26 10:46:28	1379	03/26/2022	10:46	811.401	780.998	714.945	969.707	0.356338	100.109	5.61	-1	0.5		羽流飘到了水面上，水汽干扰大
30	GF5B_AHSI_W88.7_N37.2_20230825_010454_L10000380643	Shawnee_20230825	Shawnee	37.1517	-88.775	GF5B	20230825	2023-08-26 00:54:41	2023-08-25 16:54:41	KY	CST	2023-08-25 10:54:41	1379	08/25/2023	10:54	1266.6	1261.2	1144.63	1092.46	0.0455795	215.053	2.61	1	1		有排放，圆形，无羽流形状
31	GF5B_AHSI_W92.2_N34.3_20231006_011066_L10000401605	White Bluff_20231006	White Bluff	34.4236	-92.1392	GF5B	20231006	2023-10-07 01:05:59	2023-10-06 17:05:59	AR	CST	2023-10-06 11:05:59	6009	10/06/2023	11:05	320	380.1	294.843	905.397	2.07078	176.194	2.8	-1	0.5
32	GF5B_AHSI_W94.2_N45.6_20220602_003913_L10000141558	Sherburne County_20220602	Sherburne County	45.3792	-93.8958	GF5B	20220602	2022-06-03 01:19:01	2022-06-02 17:19:01	MN	CST	2022-06-02 11:19:01	6090	06/02/2022	11:19	411.9	411.2	373.468	920.677	1.46521	101.516	4.82	-1	0.5
33	GF5B_AHSI_W94.3_N32.3_20231103_011474_L10000414550	Martin Lake_20231103	Martin Lake	32.2597	-94.5703	GF5B	20231103	2023-11-04 01:12:54	2023-11-03 17:12:54	TX	CST	2023-11-03 11:12:54	6146	11/03/2023	11:12	1488.1	1487.9	1349.95	1648.35	0.22105	362.502	2.34	-1	1		有羽流，水面噪声大
34	GF5B_AHSI_W94.5_N32.3_20220407_003097_L10000107611	Martin Lake_20220407	Martin Lake	32.2597	-94.5703	GF5B	20220407	2022-04-08 01:05:50	2022-04-07 17:05:50	TX	CST	2022-04-07 11:05:50	6146	04/07/2022	11:05	1469.4	1514	1336.39	847.206	0.366048	85.9008	6.16	-1	0.5
35	GF5B_AHSI_W94.5_N38.2_20221019_005938_L10000223276	La Cygne_20221019	La Cygne	38.3472	-94.6467	GF5B	20221019	2022-10-20 01:15:33	2022-10-19 17:15:33	KS	CST	2022-10-19 11:15:33	1241	10/19/2022	11:15	708.8	713.2	644.01	643.163	0.00131617	126.995	2.6	-1	1		32波段可见排放源
36	GF5B_AHSI_W96.5_N31.3_20221019_005938_L10000223290	Oak Grove_20221019	Oak Grove	31.185	-96.4853	GF5B	20221019	2022-10-20 01:17:28	2022-10-19 17:17:28	TX	CST	2022-10-19 11:17:28	6180	10/19/2022	11:17	1788.5	1803.2	1626.28	1807.42	0.111382	687.603	1.55	1	1		有排放
37	GF5B_AHSI_W96.9_N29.8_20221019_005938_L10000223293	Sam Seymour_20221019	Sam Seymour	29.9172	-96.7506	GF5B	20221019	2022-10-20 01:17:53	2022-10-19 17:17:53	TX	CST	2022-10-19 11:17:53	6179	10/19/2022	11:17	964.3	979	878.577	991.484	0.128512	188.623	2.61	-1	1
38	GF5B_AHSI_W101.9_N35.3_20220424_003345_L10000118254	Harrington Station_20220424	Harrington Station	35.2972	-101.748	GF5B	20220424	2022-04-25 01:38:35	2022-04-24 17:38:35	TX	CST	2022-04-24 11:38:35	6193	04/24/2022	11:38	296.2	292.8	266.755	143.013	0.463877	16.1301	6.66	-1	0
39	ZY1E_AHSI_W101.24_N41.04_20230805_020428_L1A0000637084	Gerald Gentleman Station_20230805	Gerald Gentleman Station	41.0808	-101.141	ZY1E	20230805	2023-08-05 17:48:20	2023-08-05 17:48:20	NE	CST	2023-08-05 11:48:20	6077	08/05/2023	11:48	1358.5	1357.1	1231.39	935.939	0.239936	95.3335	6.02	-1	0.5
40	ZY1E_AHSI_W101.46_N35.28_20220305_012995_L1A0000414997	Harrington Station_20220305	Harrington Station	35.2972	-101.748	ZY1E	20220305	2022-03-05 17:52:24	2022-03-05 17:52:24	TX	CST	2022-03-05 11:52:24	6193	03/05/2022	11:52	167.2	177.3	159.622	123.741	0.224786	13.9453	10.76	1	0		排放强度太低了，无法检测到
41	ZY1E_AHSI_W101.95_N35.28_20220331_013368_L1A0000427095	Harrington Station_20220331	Harrington Station	35.2972	-101.748	ZY1E	20220331	2022-03-31 17:54:08	2022-03-31 17:54:08	TX	CST	2022-03-31 11:54:08	6193	03/31/2022	11:54	641.9	638.7	579.709	607.872	0.0485812	61.6422	5.28	1	1
42	ZY1E_AHSI_W101.95_N47.64_20201123_006296_L1A0000193277	Antelope Valley_20201123	Antelope Valley	47.371	-101.836	ZY1E	20201123	2020-11-23 18:05:58	2020-11-23 18:05:58	ND	CST	2020-11-23 12:05:58	6469	11/23/2020	12:05	372.7	365.9	337.594	856.682	1.53761	90.2331	6.44	-1	0		这一景还是不太好反演
43	ZY1E_AHSI_W104.76_N41.92_20230917_021045_L1A0000655064	Laramie River_20230917	Laramie River	42.1103	-104.883	ZY1E	20230917	2023-09-17 18:02:08	2023-09-17 18:02:08	WY	MST	2023-09-17 11:02:08	6204	09/17/2023	11:02	1667.1	1881.6	1518.85	1391.19	0.0840506	114.44	7.79	-1	1		羽流良好
44	ZY1E_AHSI_W104.93_N41.92_20230625_019840_L1A0000620580	Laramie River_20230625	Laramie River	42.1103	-104.883	ZY1E	20230625	2023-06-25 18:05:08	2023-06-25 18:05:08	WY	MST	2023-06-25 11:05:08	6204	06/25/2023	11:05	1043.4	1114.7	951.947	1081.84	0.136449	216.823	2.52	-1	1		有排放
45	ZY1E_AHSI_W105.13_N42.36_20200825_005004_L1A0000136593	Laramie River_20200825	Laramie River	42.1103	-104.883	ZY1E	20200825	2020-08-25 18:10:51	2020-08-25 18:10:51	WY	MST	2020-08-25 11:10:51	6204	08/25/2020	11:10	520.3	520.5	472.038	531.489	0.125945	84.814	3.13	-1	1
46	ZY1E_AHSI_W107.47_N40.60_20231007_021332_L1A0000663395	Craig_20231007	Craig	40.4627	-107.591	ZY1E	20231007	2023-10-07 18:11:00	2023-10-07 18:11:00	CO	MST	2023-10-07 11:11:00	6021	10/07/2023	11:11	487.2	518.1	447.12	415.147	0.071508	171.53	1.36	1	0.5		有排放 不像羽流
47	ZY1E_AHSI_W107.63_N40.60_20230715_020127_L1A0000628485	Craig_20230715	Craig	40.4627	-107.591	ZY1E	20230715	2023-07-15 18:14:00	2023-07-15 18:14:00	CO	MST	2023-07-15 11:14:00	6021	07/15/2023	11:14	892.4	903.4	811.9	780.779	0.0383313	138.633	2.81	-1	1		19波段较好
48	ZY1E_AHSI_W108.64_N36.61_20200917_005334_L1A0000154763	Four Corners Steam Elec Station_20200917	Four Corners Steam Elec Station	36.69	-108.481	ZY1E	20200917	2020-09-17 18:19:28	2020-09-17 18:19:28	NM	MST	2020-09-17 11:19:28	2442	09/17/2020	11:19	1507.6	1506	1367.21	873.401	0.361181	158.745	2.71	-1	1		羽流形状好
49	ZY1E_AHSI_W108.68_N41.92_20200911_005248_L1A0000148906	Jim Bridger_20200911	Jim Bridger	41.7378	-108.787	ZY1E	20200911	2020-09-11 18:24:53	2020-09-11 18:24:53	WY	MST	2020-09-11 11:24:53	8066	09/11/2020	11:24	1437.4	1314.4	1259.35	1240.1	0.0152922	104.404	7.11	-1	1		排放位置在山上，不像排放源
50	ZY1E_AHSI_W108.72_N36.61_20231007_021332_L1A0000663404	Four Corners Steam Elec Station_20231007	Four Corners Steam Elec Station	36.69	-108.481	ZY1E	20231007	2023-10-07 18:12:07	2023-10-07 18:12:07	NM	MST	2023-10-07 11:12:07	2442	10/07/2023	11:12	1532.3	1509.9	1386.01	950.235	0.314412	313.286	1.7	1	1		羽流很完整，可以作为案例
51	ZY1E_AHSI_W108.78_N41.92_20200813_004832_L1A0000126505	Jim Bridger_20200813	Jim Bridger	41.7378	-108.787	ZY1E	20200813	2020-08-13 18:24:46	2020-08-13 18:24:46	WY	MST	2020-08-13 11:24:46	8066	08/13/2020	11:24	1902.1	1640.8	1630.74	1034.61	0.365556	101.027	5.41	1	0.5		羽流形状很好，不过怎么风速有点问题
52	ZY1E_AHSI_W111.21_N39.27_20201004_005578_L1A0000168618	Hunter_20201004	Hunter	39.1747	-111.029	ZY1E	20201004	2020-10-04 18:32:36	2020-10-04 18:32:36	UT	MST	2020-10-04 11:32:36	6165	10/04/2020	11:32	656	681.6	607.499	489.256	0.194639	121.223	2.13	-1	1		完美
53	ZY1E_AHSI_W111.31_N39.27_20200905_005163_L1A0000144224	Hunter_20200905	Hunter	39.1747	-111.029	ZY1E	20200905	2020-09-05 18:32:32	2020-09-05 18:32:32	UT	MST	2020-09-05 11:32:32	6165	09/05/2020	11:32	1057.9	1295.6	1074.72	489.011	0.544986	138.535	1.91	1	0.5		有羽流
54	ZY1E_AHSI_W85.49_N38.38_20220327_013308_L1A0000425150	Trimble County_20220327	Trimble County	38.5847	-85.4117	ZY1E	20220327	2022-03-27 16:51:14	2022-03-27 16:51:14	KY	EST	2022-03-27 11:51:14	6071	03/27/2022	11:51	412.9	409.2	371.723	572.292	0.539564	85.4203	3.62	-1	0
55	ZY1E_AHSI_W86.17_N36.17_20220327_013308_L1A0000425155	Gallatin_20220327	Gallatin	36.3156	-86.4006	ZY1E	20220327	2022-03-27 16:51:51	2022-03-27 16:51:51	TN	CST	2022-03-27 10:51:51	3403	03/27/2022	10:51	307	306.4	278.043	179.484	0.354473	45.9561	2.48	1	0
56	ZY1E_AHSI_W86.59_N36.17_20221004_016048_L1A0000511602	Gallatin_20221004	Gallatin	36.3156	-86.4006	ZY1E	20221004	2022-10-04 16:51:33	2022-10-04 16:51:33	TN	CST	2022-10-04 10:51:33	3403	10/04/2022	10:51	758.6	764.3	692.586	730.097	0.0541607	289.943	1.48	-1	0.5		像伪排放源
57	ZY1E_AHSI_W88.87_N37.06_20211128_011601_L1A0000371189	Shawnee_20211128	Shawnee	37.1517	-88.775	ZY1E	20211128	2021-11-28 17:03:59	2021-11-28 17:03:59	KY	CST	2021-11-28 11:03:59	1379	11/28/2021	11:03	406.4	406.4	368.68	387.311	0.0505345	68.9386	3.51	1	0.5		有排放
58	ZY1E_AHSI_W88.95_N37.06_20210119_007111_L1A0000229838	Shawnee_20210119	Shawnee	37.1517	-88.775	ZY1E	20210119	2021-01-19 17:02:53	2021-01-19 17:02:53	KY	CST	2021-01-19 11:02:53	1379	01/19/2021	11:02	868.501	669.401	781.87	755.96	0.0331387	289.132	1.57	1	1		右下角伪排放源
59	ZY1E_AHSI_W89.08_N37.06_20201221_006696_L1A0000212411	Shawnee_20201221	Shawnee	37.1517	-88.775	ZY1E	20201221	2020-12-21 17:03:04	2020-12-21 17:03:04	KY	CST	2020-12-21 11:03:04	1379	12/21/2020	11:03	386.9	386.599	350.976	905.071	1.57872	101.828	6.44	-1	0.5
60	ZY1E_AHSI_W90.79_N38.83_20210925_010683_L1A0000340283	Labadie_20210925	Labadie	38.5583	-90.8361	ZY1E	20210925	2021-09-25 17:13:23	2021-09-25 17:13:23	MO	CST	2021-09-25 11:13:23	2103	09/25/2021	11:13	1746.6	1732.6	1581.74	2026.84	0.281401	344.953	2.94	-1	1
61	ZY1E_AHSI_W90.90_N38.38_20220113_012261_L1A0000391512	Labadie_20220113	Labadie	38.5583	-90.8361	ZY1E	20220113	2022-01-13 17:13:19	2022-01-13 17:13:19	MO	CST	2022-01-13 11:13:19	2103	01/13/2022	11:13	1841.4	1849.6	1672.1	1333.74	0.20236	438.295	1.73	-1	1
62	ZY1E_AHSI_W90.98_N38.38_20230329_018573_L1A0000585856	Labadie_20230329	Labadie	38.5583	-90.8361	ZY1E	20230329	2023-03-29 17:07:56	2023-03-29 17:07:56	MO	CST	2023-03-29 11:07:56	2103	03/29/2023	11:07	2464.5	2453.2	2234.56	1773.77	0.206209	655.194	1.58	1	0.5		羽流沿着江面规整陈列
63	ZY1E_AHSI_W91.94_N34.40_20220726_015044_L1A0000481359	White Bluff_20220726	White Bluff	34.4236	-92.1392	ZY1E	20220726	2022-07-26 17:12:13	2022-07-26 17:12:13	AR	CST	2022-07-26 11:12:13	6009	07/26/2022	11:12	1389.4	1742.2	1324.45	978.709	0.261047	163.102	3.26	-1	1		微弱的排放
64	ZY1E_AHSI_W92.11_N34.40_20220113_012261_L1A0000391521	White Bluff_20220113	White Bluff	34.4236	-92.1392	ZY1E	20220113	2022-01-13 17:14:27	2022-01-13 17:14:27	AR	CST	2022-01-13 11:14:27	6009	01/13/2022	11:14	901.3	897.1	816.757	505.896	0.380603	131.106	2.28	1	0		没有排放
65	ZY1E_AHSI_W92.15_N34.40_20220309_013050_L1A0000416988	White Bluff_20220309	White Bluff	34.4236	-92.1392	ZY1E	20220309	2022-03-09 17:14:19	2022-03-09 17:14:19	AR	CST	2022-03-09 11:14:19	6009	03/09/2022	11:14	280.3	279.1	254.03	1026.88	3.04234	187.311	2.83	-1	0.5		很多云，不适合反演
66	ZY1E_AHSI_W92.33_N34.40_20231104_021729_L1A0000674441	White Bluff_20231104	White Bluff	34.4236	-92.1392	ZY1E	20231104	2023-11-04 17:03:42	2023-11-04 17:03:42	AR	CST	2023-11-04 11:03:42	6009	11/04/2023	11:03	537.3	433.2	482.708	424.924	0.119708	242.637	0.86	1	1
67	ZY1E_AHSI_W93.56_N45.45_20220320_013210_L1A0000421897	Sherburne County_20220320	Sherburne County	45.3792	-93.8958	ZY1E	20220320	2022-03-20 17:31:14	2022-03-20 17:31:14	MN	CST	2022-03-20 11:31:14	6090	03/20/2022	11:31	1451.2	1311.2	1250.89	623.601	0.501473	185.353	1.91	-1	0.5
68	ZY1E_AHSI_W94.02_N45.45_20220927_015948_L1A0000508557	Sherburne County_20220927	Sherburne County	45.3792	-93.8958	ZY1E	20220927	2022-09-27 17:31:08	2022-09-27 17:31:08	MN	CST	2022-09-27 11:31:08	6090	09/27/2022	11:31	1052.9	1052.9	955.175	1780.29	0.863835	279.394	3.34	1	0.5		有羽流
69	ZY1E_AHSI_W94.33_N38.38_20211206_011716_L1A0000374910	La Cygne_20211206	La Cygne	38.3472	-94.6467	ZY1E	20211206	2021-12-06 17:27:03	2021-12-06 17:27:03	KS	CST	2021-12-06 11:27:03	1241	12/06/2021	11:27	365.5	442.9	363.173	619.288	0.705213	83.082	4.78	1	0.5
70	ZY1E_AHSI_W94.40_N32.17_20210401_008144_L1A0000261751	Martin Lake_20210401	Martin Lake	32.2597	-94.5703	ZY1E	20210401	2021-04-01 17:20:59	2021-04-01 17:20:59	TX	CST	2021-04-01 11:20:59	6146	04/01/2021	11:20	1201.3	1170.4	1080.46	1111.71	0.0289255	186.813	3.06	-1	1		有羽流
71	ZY1E_AHSI_W94.44_N38.38_20210913_010511_L1A0000334632	La Cygne_20210913	La Cygne	38.3472	-94.6467	ZY1E	20210913	2021-09-13 17:27:32	2021-09-13 17:27:32	KS	CST	2021-09-13 11:27:32	1241	09/13/2021	11:27	662.6	671	604.53	1043.35	0.725879	124.22	5.41	-1	0.5
72	ZY1E_AHSI_W94.49_N38.38_20200711_004357_L1A0000107667	La Cygne_20200711	La Cygne	38.3472	-94.6467	ZY1E	20200711	2020-07-11 17:23:19	2020-07-11 17:23:19	KS	CST	2020-07-11 11:23:19	1241	07/11/2020	11:23	1601.4	1598	1451.58	2321.53	0.59931	426.889	2.72	-1	1		反演效果不好，只有一团排放；感觉有点像是把水汽也核算进去了，偏高很多；误差太大了
73	ZY1E_AHSI_W94.59_N32.17_20220303_012967_L1A0000414108	Martin Lake_20220303	Martin Lake	32.2597	-94.5703	ZY1E	20220303	2022-03-03 17:22:15	2022-03-03 17:22:15	TX	CST	2022-03-03 11:22:15	6146	03/03/2022	11:22	1866.9	1838.5	1684.18	599.629	0.643963	454.485	0.58	-1	2		这一景本应该能够看到完美羽流的，但是羽流的方向刚好经过了湖面，导致出现一段非常大的异常高值
74	ZY1E_AHSI_W94.77_N32.17_20210104_006896_L1A0000221658	Martin Lake_20210104	Martin Lake	32.2597	-94.5703	ZY1E	20210104	2021-01-04 17:21:40	2021-01-04 17:21:40	TX	CST	2021-01-04 11:21:40	6146	01/04/2021	11:21	1286	1418.3	1208.65	735.039	0.39185	210.319	1.96	-1	0		水汽干扰大，几乎无反演结果
75	ZY1E_AHSI_W96.19_N31.29_20220130_012507_L1A0000399543	Oak Grove_20220130	Oak Grove	31.185	-96.4853	ZY1E	20220130	2022-01-30 17:28:05	2022-01-30 17:28:05	TX	CST	2022-01-30 11:28:05	6180	01/30/2022	11:28	1396	1398.9	1267.66	1168.69	0.0780716	137.446	4.62	1	1
76	ZY1E_AHSI_W96.23_N31.29_20220326_013296_L1A0000424559	Oak Grove_20220326	Oak Grove	31.185	-96.4853	ZY1E	20220326	2022-03-26 17:27:55	2022-03-26 17:27:55	TX	CST	2022-03-26 11:27:55	6180	03/26/2022	11:27	767.3	835.6	723.965	929.472	0.283863	144.01	3.3	-1	1
77	ZY1E_AHSI_W96.26_N31.29_20201006_005607_L1A0000169633	Oak Grove_20201006	Oak Grove	31.185	-96.4853	ZY1E	20201006	2020-10-06 17:25:38	2020-10-06 17:25:38	TX	CST	2020-10-06 11:25:38	6180	10/06/2020	11:25	1874.4	1879.2	1702.24	1958.78	0.150704	543.999	1.93	1	1		有排放，无羽流
78	ZY1E_AHSI_W96.28_N31.29_20210424_008474_L1A0000271419	Oak Grove_20210424	Oak Grove	31.185	-96.4853	ZY1E	20210424	2021-04-24 17:27:56	2021-04-24 17:27:56	TX	CST	2021-04-24 11:27:56	6180	04/24/2021	11:27	893.6	900.9	813.64	990.33	0.217159	102.367	5.95	-1	1		偏高
79	ZY1E_AHSI_W96.41_N31.29_20211206_011716_L1A0000374926	Oak Grove_20211206	Oak Grove	31.185	-96.4853	ZY1E	20211206	2021-12-06 17:29:06	2021-12-06 17:29:06	TX	CST	2021-12-06 11:29:06	6180	12/06/2021	11:29	1798.7	1790.1	1627.98	2137.8	0.313161	183.84	7.76	-1	1		有一点点羽流
80	ZY1E_AHSI_W96.55_N29.95_20220130_012507_L1A0000399546	Sam Seymour_20220130	Sam Seymour	29.9172	-96.7506	ZY1E	20220130	2022-01-30 17:28:28	2022-01-30 17:28:28	TX	CST	2022-01-30 11:28:28	6179	01/30/2022	11:28	1394.8	1390.4	1263.48	784.321	0.379237	143.142	2.83	-1	0.5
81	ZY1E_AHSI_W96.58_N31.29_20200711_004359_L1A0000107694	Oak Grove_20200711	Oak Grove	31.185	-96.4853	ZY1E	20200711	2020-07-11 17:25:19	2020-07-11 17:25:19	TX	CST	2020-07-11 11:25:19	6180	07/11/2020	11:25	1869.6	1875.6	1698.34	1956.38	0.151933	297.695	3.26	-1	1		羽流可以
82	ZY1E_AHSI_W96.59_N29.95_20220326_013296_L1A0000424562	Sam Seymour_20220326	Sam Seymour	29.9172	-96.7506	ZY1E	20220326	2022-03-26 17:28:17	2022-03-26 17:28:17	TX	CST	2022-03-26 11:28:17	6179	03/26/2022	11:28	1765.4	1773.9	1605.14	1640.86	0.022251	208.941	3.98	1	0.5		能看到排放，但羽流飘到了湖面上
83	ZY1E_AHSI_W96.65_N29.95_20210424_008474_L1A0000271422	Sam Seymour_20210424	Sam Seymour	29.9172	-96.7506	ZY1E	20210424	2021-04-24 17:28:19	2021-04-24 17:28:19	TX	CST	2021-04-24 11:28:19	6179	04/24/2021	11:28	1037.5	1164.7	995.055	1060.41	0.0656808	101.999	6.15	-1	1
84	ZY1E_AHSI_W96.74_N31.10_20200612_003941_L1A0000093912	Oak Grove_20200612	Oak Grove	31.185	-96.4853	ZY1E	20200612	2020-06-12 17:25:12	2020-06-12 17:25:12	TX	CST	2020-06-12 11:25:12	6180	06/12/2020	11:25	1759.1	1762.5	1597.11	2295.8	0.437468	289.887	4	1	1		排放羽流很清晰
85	ZY1E_AHSI_W96.95_N29.95_20200711_004359_L1A0000107697	Sam Seymour_20200711	Sam Seymour	29.9172	-96.7506	ZY1E	20200711	2020-07-11 17:25:42	2020-07-11 17:25:42	TX	CST	2020-07-11 11:25:42	6179	07/11/2020	11:25	1793.1	1824.9	1638.69	1226.92	0.25128	215.85	2.82	1	1		有羽流，还不错，飘到水面上了，前16波段清晰；作为强吸收和弱吸收的案例
86	ZY1E_AHSI_W97.05_N29.95_20200612_003941_L1A0000093915	Sam Seymour_20200612	Sam Seymour	29.9172	-96.7506	ZY1E	20200612	2020-06-12 17:25:31	2020-06-12 17:25:31	TX	CST	2020-06-12 11:25:31	6179	06/12/2020	11:25	1467.5	1562.8	1367.32	1639.83	0.199305	223.096	3.64	1	1		羽流形状很好，可以作为案例
87	ZY1E_AHSI_W98.07_N29.51_20220930_015991_L1A0000509878	J K Spruce_20220930	J K Spruce	29.3091	-98.3205	ZY1E	20220930	2022-09-30 17:31:53	2022-09-30 17:31:53	TX	CST	2022-09-30 11:31:53	7097	09/30/2022	11:31	1501.1	1499.5	1361.03	1374.48	0.00988675	495.343	1.61	-1	1		有噪声，有羽流
88	ZY1E_AHSI_W98.20_N29.06_20220418_013626_L1A0000435959	J K Spruce_20220418	J K Spruce	29.3091	-98.3205	ZY1E	20220418	2022-04-18 17:33:49	2022-04-18 17:33:49	TX	CST	2022-04-18 11:33:49	7097	04/18/2022	11:33	629.1	628.9	570.61	700.746	0.228065	68.9474	6.44	1	1
89	ZY1E_AHSI_W98.50_N29.51_20200930_005521_L1A0000170469	J K Spruce_20200930	J K Spruce	29.3091	-98.3205	ZY1E	20200930	2020-09-30 17:33:03	2020-09-30 17:33:03	TX	CST	2020-09-30 11:33:03	7097	09/30/2020	11:33	914.9	958.2	851.588	1234.35	0.449463	195.269	3.18	1	1
90	ZY1E_AHSI_W98.51_N29.06_20201029_005935_L1A0000194928	J K Spruce_20201029	J K Spruce	29.3091	-98.3205	ZY1E	20201029	2020-10-29 17:33:12	2020-10-29 17:33:12	TX	CST	2020-10-29 11:33:12	7097	10/29/2020	11:33	508.1	564.9	489.281	524.493	0.0719665	53.9076	7.17	-1	1		有团块排放
91	ZY1E_AHSI_W98.53_N29.51_20220514_013997_L1A0000447750	J K Spruce_20220514	J K Spruce	29.3091	-98.3205	ZY1E	20220514	2022-05-14 17:35:16	2022-05-14 17:35:16	TX	CST	2022-05-14 11:35:16	7097	05/14/2022	11:35	1041	1035.2	941.31	1391.05	0.477786	339.591	2.12	-1	1
92	ZY1E_AHSI_W101.46_N35.28_20220305_012995_L1A0000414997	Harrington Station_20220305	Harrington Station	35.2972	-101.748	ZY1E	20220305	2022-03-05 17:52:24	2022-03-05 17:52:24	TX	CST	2022-03-05 11:52:24	6193	03/05/2022	11:52	167.2	177.3	159.622	123.741	0.224786	12.6437	10.76	1	0		排放强度太低了，无法检测到
93	ZY1F_AHSI_W101.04_N41.04_20230916_009032_L1A0000537816	Gerald Gentleman Station_20230916	Gerald Gentleman Station	41.0808	-101.141	ZY1F	20230916	2023-09-16 18:00:26	2023-09-16 18:00:26	NE	CST	2023-09-16 12:00:26	6077	09/16/2023	12:00	1330.8	1109.2	1207.28	812.021	0.327397	107.316	3.96	1	0.5
94	ZY1F_AHSI_W101.05_N41.04_20231110_009821_L1A0000582861	Gerald Gentleman Station_20231110	Gerald Gentleman Station	41.0808	-101.141	ZY1F	20231110	2023-11-10 18:01:07	2023-11-10 18:01:07	NE	CST	2023-11-10 12:01:07	6077	11/10/2023	12:01	1304.1	1307.4	1183.11	797.5	0.325928	87.2364	4.88	1	1
95	ZY1F_AHSI_W101.48_N41.04_20230624_007827_L1A0000469131	Gerald Gentleman Station_20230624	Gerald Gentleman Station	41.0808	-101.141	ZY1F	20230624	2023-06-24 18:00:53	2023-06-24 18:00:53	NE	CST	2023-06-24 12:00:53	6077	06/24/2023	12:00	688	687.2	624.143	581.185	0.0688275	48.9512	7.6	1	1		10波段效果好
96	ZY1F_AHSI_W104.83_N41.92_20230930_009233_L1A0000549577	Laramie River_20230930	Laramie River	42.1103	-104.883	ZY1F	20230930	2023-09-30 18:16:43	2023-09-30 18:16:43	WY	MST	2023-09-30 11:16:43	6204	09/30/2023	11:16	798.9	661.1	691.414	699.086	0.0110958	104.046	3.4	-1	1		有羽流
97	ZY1F_AHSI_W107.55_N40.59_20231020_009525_L1A0000564874	Craig_20231020	Craig	40.4627	-107.591	ZY1F	20231020	2023-10-20 18:26:24	2023-10-20 18:26:24	CO	MST	2023-10-20 11:26:24	6021	10/20/2023	11:26	729.3	742.5	666.799	27.5001	0.958758	28.0776	0.42	1	2		22有一个羽流 24双羽流0.001
98	ZY1F_AHSI_W110.71_N39.27_20230817_008602_L1A0000512937	Hunter_20230817	Hunter	39.1747	-111.029	ZY1F	20230817	2023-08-17 18:36:51	2023-08-17 18:36:51	UT	MST	2023-08-17 11:36:51	6165	08/17/2023	11:36	654	651.7	592.047	572.721	0.0326423	144.9	2.06	1	1
99	ZY1F_AHSI_W110.73_N39.27_20230623_007813_L1A0000468861	Hunter_20230623	Hunter	39.1747	-111.029	ZY1F	20230623	2023-06-23 18:36:03	2023-06-23 18:36:03	UT	MST	2023-06-23 11:36:03	6165	06/23/2023	11:36	422.6	419.8	381.852	492.145	0.288838	47.1209	6.19	-1	0.5		有点不像
100	ZY1F_AHSI_W111.15_N39.27_20230719_008186_L1A0000490264	Hunter_20230719	Hunter	39.1747	-111.029	ZY1F	20230719	2023-07-19 18:38:10	2023-07-19 18:38:10	UT	MST	2023-07-19 11:38:10	6165	07/19/2023	11:38	656.412	749.552	649.001	152.366	0.765229	130.367	0.5	1	2		清晰完美
101	ZY1F_AHSI_W80.08_N39.27_20220621_002553_L1A0000190867	Harrison Power Station_20220621	Harrison Power Station	39.3844	-80.3325	ZY1F	20220621	2022-06-21 16:24:44	2022-06-21 16:24:44	WV	EST	2022-06-21 11:24:44	3944	06/21/2022	11:24	1900.6	2008.4	1763.31	1635.03	0.0727506	355.005	2.33	1	1		非常清晰
102	ZY1F_AHSI_W80.61_N39.27_20230418_006865_L1A0000414746	Harrison Power Station_20230418	Harrison Power Station	39.3844	-80.3325	ZY1F	20230418	2023-04-18 16:34:27	2023-04-18 16:34:27	WV	EST	2023-04-18 11:34:27	3944	04/18/2023	11:34	631.6	618	565.987	589.939	0.042319	59.9357	5.73	-1	1
103	ZY1F_AHSI_W86.57_N36.17_20230305_006234_L1A0000379047	Gallatin_20230305	Gallatin	36.3156	-86.4006	ZY1F	20230305	2023-03-05 16:54:32	2023-03-05 16:54:32	TN	CST	2023-03-05 10:54:32	3403	03/05/2023	10:54	278.3	276	250.592	348.642	0.391277	75.8977	2.5	-1	0		无排放
104	ZY1F_AHSI_W88.63_N37.05_20231031_009677_L1A0000574307	Shawnee_20231031	Shawnee	37.1517	-88.775	ZY1F	20231031	2023-10-31 17:07:20	2023-10-31 17:07:20	KY	CST	2023-10-31 11:07:20	1379	10/31/2023	11:07	879.1	888.799	798.533	355.636	0.554638	62.4641	3.6	-1	0		羽流飘到了水面上，水汽干扰大
105	ZY1F_AHSI_W90.79_N38.83_20230704_007970_L1A0000476992	Labadie_20230704	Labadie	38.5583	-90.8361	ZY1F	20230704	2023-07-04 17:16:01	2023-07-04 17:16:01	MO	CST	2023-07-04 11:16:01	2103	07/04/2023	11:16	2560.7	2558.1	2322.4	2258.13	0.0276719	467.001	2.41	-1	1		构成羽流，有排放
106	ZY1F_AHSI_W90.93_N38.38_20231022_009549_L1A0000565683	Labadie_20231022	Labadie	38.5583	-90.8361	ZY1F	20231022	2023-10-22 17:17:43	2023-10-22 17:17:43	MO	CST	2023-10-22 11:17:43	2103	10/22/2023	11:17	2197.7	2194	1992.77	1699.85	0.146992	476.859	1.92	-1	0.5		受江水影响较大
107	ZY1F_AHSI_W93.93_N45.45_20220721_002978_L1A0000173921	Sherburne County_20220721	Sherburne County	45.3792	-93.8958	ZY1F	20220721	2022-07-21 17:27:56	2022-07-21 17:27:56	MN	CST	2022-07-21 11:27:56	6090	07/21/2022	11:27	2400.9	2419.9	2185.82	2590.27	0.185037	241.855	5.9	1	1		适合作为反演案例
108	ZY1F_AHSI_W94.55_N32.17_20231210_010251_L1A0000608285	Martin Lake_20231210	Martin Lake	32.2597	-94.5703	ZY1F	20231210	2023-12-10 17:27:08	2023-12-10 17:27:08	TX	CST	2023-12-10 11:27:08	6146	12/10/2023	11:27	1027.6	1026.4	931.733	1050.18	0.127129	125.133	4.79	-1	1		有羽流
109	ZY1F_AHSI_W94.55_N38.38_20220920_003853_L1A0000229994	La Cygne_20220920	La Cygne	38.3472	-94.6467	ZY1F	20220920	2022-09-20 17:24:31	2022-09-20 17:24:31	KS	CST	2022-09-20 11:24:31	1241	09/20/2022	11:24	759.1	765.6	691.003	518.877	0.249095	62.6793	5.01	-1	0.5		水汽影响太大了
110	ZY1F_AHSI_W94.56_N38.38_20230816_008587_L1A0000512042	La Cygne_20230816	La Cygne	38.3472	-94.6467	ZY1F	20230816	2023-08-16 17:31:23	2023-08-16 17:31:23	KS	CST	2023-08-16 11:31:23	1241	08/16/2023	11:31	1273.7	1441.1	1233.94	948.675	0.231184	171.354	2.8	1	0.5		飘到湖面上了
111	ZY1F_AHSI_W94.57_N32.17_20220802_003150_L1A0000184740	Martin Lake_20220802	Martin Lake	32.2597	-94.5703	ZY1F	20220802	2022-08-02 17:17:29	2022-08-02 17:17:29	TX	CST	2022-08-02 11:17:29	6146	08/02/2022	11:17	2263.6	2623.6	2146.04	2088.37	0.0268718	305.618	3.39	1	0.5		有排放，圆形，堆叠状，飘到湖面上
112	ZY1F_AHSI_W94.58_N38.38_20230108_005431_L1A0000329362	La Cygne_20230108	La Cygne	38.3472	-94.6467	ZY1F	20230108	2023-01-08 17:27:27	2023-01-08 17:27:27	KS	CST	2023-01-08 11:27:27	1241	01/08/2023	11:27	1406.5	1398.2	1272.57	341.173	0.731902	155.533	1.2	-1	0.5		噪声较大
113	ZY1F_AHSI_W94.61_N32.17_20221120_004728_L1A0000290523	Martin Lake_20221120	Martin Lake	32.2597	-94.5703	ZY1F	20221120	2022-11-20 17:20:45	2022-11-20 17:20:45	TX	CST	2022-11-20 11:20:45	6146	11/20/2022	11:20	2635.2	2664.4	2399.44	2279.06	0.0501729	385.388	2.97	1	1		有一点羽流比较稀疏
114	ZY1F_AHSI_W96.64_N31.29_20220727_003064_L1A0000178119	Oak Grove_20220727	Oak Grove	31.185	-96.4853	ZY1F	20220727	2022-07-27 17:24:51	2022-07-27 17:24:51	TX	CST	2022-07-27 11:24:51	6180	07/27/2022	11:24	1241	1493.7	1217.51	983.127	0.192513	130.435	3.79	-1	1
115	ZY1F_AHSI_W96.65_N31.29_20230304_006220_L1A0000378222	Oak Grove_20230304	Oak Grove	31.185	-96.4853	ZY1F	20230304	2023-03-04 17:30:35	2023-03-04 17:30:35	TX	CST	2023-03-04 11:30:35	6180	03/04/2023	11:30	650.4	654.3	591.802	770.922	0.302669	104.412	3.8	-1	1		被云挡住了
116	ZY1F_AHSI_W96.65_N31.29_20230816_008587_L1A0000512058	Oak Grove_20230816	Oak Grove	31.185	-96.4853	ZY1F	20230816	2023-08-16 17:33:23	2023-08-16 17:33:23	TX	CST	2023-08-16 11:33:23	6180	08/16/2023	11:33	1820.5	1806.6	1644.59	2292.16	0.393756	432.15	2.6	-1	1		羽流很好，简直完美！！！适合作为案例
117	ZY1F_AHSI_W96.67_N31.29_20230108_005431_L1A0000329378	Oak Grove_20230108	Oak Grove	31.185	-96.4853	ZY1F	20230108	2023-01-08 17:29:27	2023-01-08 17:29:27	TX	CST	2023-01-08 11:29:27	6180	01/08/2023	11:29	1957.3	1974.5	1783.17	1658.77	0.0697672	192.725	4.4	-1	1		有羽流，水池下方有一个点源
118	ZY1F_AHSI_W97.01_N29.95_20230304_006220_L1A0000378225	Sam Seymour_20230304	Sam Seymour	29.9172	-96.7506	ZY1F	20230304	2023-03-04 17:30:57	2023-03-04 17:30:57	TX	CST	2023-03-04 11:30:57	6179	03/04/2023	11:30	672.8	881.2	704.883	1118.88	0.587335	185.211	3.01	-1	0.5
119	ZY1F_AHSI_W97.01_N29.95_20230816_008587_L1A0000512061	Sam Seymour_20230816	Sam Seymour	29.9172	-96.7506	ZY1F	20230816	2023-08-16 17:33:45	2023-08-16 17:33:45	TX	CST	2023-08-16 11:33:45	6179	08/16/2023	11:33	1354.8	1363.7	1233.49	1199.19	0.0278112	253.966	2.37	1	1
120	ZY1F_AHSI_W98.47_N29.51_20221013_004183_L1A0000250381	J K Spruce_20221013	J K Spruce	29.3091	-98.3205	ZY1F	20221013	2022-10-13 17:33:02	2022-10-13 17:33:02	TX	CST	2022-10-13 11:33:02	7097	10/13/2022	11:33	1492.3	1495.9	1355.59	1426.91	0.0526155	136.896	5.76	1	1		噪声较大

## Sheet: 2024.10
序号	filename	foldername	Facility Name	Latitude	Longitude	satellite	date	Time of Satellite	UTC	State	Zone	Local Standard Time	Facility ID	day LST	time	前整点Q	后整点Q	avg Q(ton/h)	反演结果	反演误差	不确定度	风速	提取	排放	备注
1	GF5_AHSI_W107.84_N40.19_20190803_006569_L10000052859	Craig_20190802	Craig	40.4627	-107.591	GF5	20190803	2019-08-03 04:08:09	2019-08-02 20:08:09	CO	MST	2019-08-02 13:08:09	6021	08/02/2019	13:08	1356.3	1381	1233.4	1213.03	0.0165143	184.164	3.26	-1	1
2	GF5_AHSI_W111.09_N39.21_20191118_008126_L10000065664	Hunter_20191118	Hunter	39.1747	-111.029	GF5	20191118	2019-11-18 04:20:29	2019-11-17 20:20:29	UT	MST	2019-11-17 13:20:29	6165	11/17/2019	13:20	889	885.7	805.489	320.907	0.6016	175.229	0.91	1	0
3	GF5_AHSI_W85.14_N38.72_20191225_008664_L10000068784	Trimble County_20191225	Trimble County	38.5847	-85.4117	GF5	20191225	2019-12-25 02:36:43	2019-12-24 18:36:43	KY	EST	2019-12-24 13:36:43	6071	12/24/2019	13:36	1037.4	1080.8	964.737	1220.82	0.265442	588.499	1.06	-1	1
4	GF5A_AHSI_W108.6_N36.7_20231227_005597_L10000078715	Four Corners Steam Elec Station_20231227	Four Corners Steam Elec Station	36.69	-108.481	GF5A	20231227	2023-12-27 20:12:59	2023-12-27 20:12:59	NM	MST	2023-12-27 13:12:59	2442	12/27/2023	13:12	797	796.8	722.99	923.548	0.277401	112.666	4.38	-1	1
5	GF5A_AHSI_W108.7_N41.7_20231213_005393_L10000074107	Jim Bridger_20231213	Jim Bridger	41.7378	-108.787	GF5A	20231213	2023-12-13 20:08:54	2023-12-13 20:08:54	WY	MST	2023-12-13 13:08:54	8066	12/13/2023	13:08	1825.9	1677	1638.42	1904.64	0.16249	243.568	4	-1	1
6	GF5A_AHSI_W108.8_N41.7_20230923_004213_L10000054221	Jim Bridger_20230923	Jim Bridger	41.7378	-108.787	GF5A	20230923	2023-09-23 20:11:46	2023-09-23 20:11:46	WY	MST	2023-09-23 13:11:46	8066	09/23/2023	13:11	460.9	452.2	416.674	202.515	0.513972	20.189	7.1	-1	2
7	GF5A_AHSI_W94.3_N32.3_20230908_003994_L10000051261	Martin Lake_20230908	Martin Lake	32.2597	-94.5703	GF5A	20230908	2023-09-08 19:22:37	2023-09-08 19:22:37	TX	CST	2023-09-08 13:22:37	6146	09/08/2023	13:22	2712.1	2709.3	2459.44	2454.57	0.00198334	344.338	3.48	-1	1	有羽流、但周围水汽干扰也很大
8	GF5A_AHSI_W98.5_N29.3_20230814_003630_L10000044804	J K Spruce_20230814	J K Spruce	29.3091	-98.3205	GF5A	20230814	2023-08-14 19:42:15	2023-08-14 19:42:15	TX	CST	2023-08-14 13:42:15	7097	08/14/2023	13:42	1389.2	1408.7	1272.64	1260.08	0.00986904	415.431	1.7	1	1	完美
9	GF5B_AHSI_W100.9_N41.2_20220628_004292_L10000156032	Gerald Gentleman Station_20220628	Gerald Gentleman Station	41.0808	-101.141	GF5B	20220628	2022-06-29 01:41:40	2022-06-28 17:41:40	NE	CST	2022-06-28 11:41:40	6077	06/28/2022	11:41	1314.5	1320.1	1195.97	392.081	0.672163	103.932	2	1	2	24波段可见排放，有排放，但是算不准，靠近湖边
10	GF5B_AHSI_W101.1_N41.2_20211220_001524_L10000044164	Gerald Gentleman Station_20211220	Gerald Gentleman Station	41.0808	-101.141	GF5B	20211220	2021-12-21 01:37:21	2021-12-20 17:37:21	NE	CST	2021-12-20 11:37:21	6077	12/20/2021	11:37	1201.3	1283	1135.51	855.908	0.246232	109.457	4.12	-1	2
11	GF5B_AHSI_W101.6_N47.5_20220619_004161_L10000151101	Antelope Valley_20220619	Antelope Valley	47.371	-101.836	GF5B	20220619	2022-06-20 01:51:31	2022-06-19 17:51:31	ND	CST	2022-06-19 11:51:31	6469	06/19/2022	11:51	522.7	565.6	507.266	774.844	0.52749	92.5226	4.53	1	1
12	GF5B_AHSI_W101.9_N35.3_20220424_003345_L10000118254	Harrington Station_20220424	Harrington Station	35.2972	-101.748	GF5B	20220424	2022-04-25 01:38:35	2022-04-24 17:38:35	TX	CST	2022-04-24 11:38:35	6193	04/24/2022	11:38	296.2	292.8	266.755	143.013	0.463877	16.1301	6.66	-1	0
13	GF5B_AHSI_W102.0_N47.5_20220316_002777_L10000118963	Antelope Valley_20220316	Antelope Valley	47.371	-101.836	GF5B	20220316	2022-03-17 01:50:55	2022-03-16 17:50:55	ND	CST	2022-03-16 11:50:55	6469	03/16/2022	11:50	560.6	524.1	480.974	548.798	0.141012	53.5777	9.18	-1	0
14	GF5B_AHSI_W102.1_N47.5_20220626_004263_L10000154923	Antelope Valley_20220626	Antelope Valley	47.371	-101.836	GF5B	20220626	2022-06-27 01:53:27	2022-06-26 17:53:27	ND	CST	2022-06-26 11:53:27	6469	06/26/2022	11:53	667	827.8	733.949	605.428	0.175109	64.8422	6.59	1	1	能看见一点
15	GF5B_AHSI_W107.5_N40.2_20230926_010921_L10000396892	Craig_20230926	Craig	40.4627	-107.591	GF5B	20230926	2023-09-27 02:12:39	2023-09-26 18:12:39	CO	MST	2023-09-26 11:12:39	6021	09/26/2023	11:12	761.2	909.1	717.384	680.668	0.0511795	319.497	1.1	-1	0.5
16	GF5B_AHSI_W107.8_N40.7_20221018_005924_L10000222668	Craig_20221018	Craig	40.4627	-107.591	GF5B	20221018	2022-10-19 02:11:02	2022-10-18 18:11:02	CO	MST	2022-10-18 11:11:02	6021	10/18/2022	11:11	830.6	831.6	753.674	801.851	0.0639229	282.907	1.63	-1	1	两个源
17	GF5B_AHSI_W108.2_N36.7_20220610_004030_L10000145798	Four Corners Steam Elec Station_20220610	Four Corners Steam Elec Station	36.69	-108.481	GF5B	20220610	2022-06-11 02:06:07	2022-06-10 18:06:07	NM	MST	2022-06-10 11:06:07	2442	06/10/2022	11:06	1471.5	1052.86	1296.94	1078.79	0.168203	176.871	2.97	1	1	完美
18	GF5B_AHSI_W108.3_N36.7_20220420_003287_L10000117219	Four Corners Steam Elec Station_20220420	Four Corners Steam Elec Station	36.69	-108.481	GF5B	20220420	2022-04-21 02:05:10	2022-04-20 18:05:10	NM	MST	2022-04-20 11:05:10	2442	04/20/2022	11:05	539.3	621.1	495.429	312.334	0.369567	69.3724	2.3	-1	2	有排放
19	GF5B_AHSI_W108.3_N36.7_20240106_012407_L10000448627	Four Corners Steam Elec Station_20240106	Four Corners Steam Elec Station	36.69	-108.481	GF5B	20240106	2024-01-07 02:12:33	2024-01-06 18:12:33	NM	MST	2024-01-06 11:12:33	2442	01/06/2024	11:12	1357.4	1191	1201.22	732.082	0.390552	308.753	1.32	1	1
20	GF5B_AHSI_W108.8_N41.7_20220212_002311_L10000077220	Jim Bridger_20220212	Jim Bridger	41.7378	-108.787	GF5B	20220212	2022-02-13 02:10:06	2022-02-12 18:10:06	WY	MST	2022-02-12 11:10:06	8066	02/12/2022	11:10	580.1	545	520.951	472.34	0.0933113	56.6115	4.49	-1	1	有排放，但周围噪声明显更大，不适合反演
21	GF5B_AHSI_W109.0_N41.6_20231031_011431_L10000413197	Jim Bridger_20231031	Jim Bridger	41.7378	-108.787	GF5B	20231031	2023-11-01 02:20:04	2023-10-31 18:20:04	WY	MST	2023-10-31 11:20:04	8066	10/31/2023	11:20	1208.8	1174.8	1086.32	1033.73	0.0484146	96.7592	6.01	-1	1
22	GF5B_AHSI_W109.1_N41.6_20231221_012174_L10000440228	Jim Bridger_20231221	Jim Bridger	41.7378	-108.787	GF5B	20231221	2023-12-22 02:20:37	2023-12-21 18:20:37	WY	MST	2023-12-21 11:20:37	8066	12/21/2023	11:20	994.7	868	864.063	776.223	0.101659	128.524	3.18	1	0.5
23	GF5B_AHSI_W110.9_N39.2_20220418_003258_L10000114473	Hunter_20220418	Hunter	39.1747	-111.029	GF5B	20220418	2022-04-19 02:17:59	2022-04-18 18:17:59	UT	MST	2022-04-18 11:17:59	6165	04/18/2022	11:17	909.6	899.7	822.631	137.38	0.832999	101.72	0.6	1	3	低风速
24	GF5B_AHSI_W110.9_N39.2_20240104_012378_L10000447404	Hunter_20240104	Hunter	39.1747	-111.029	GF5B	20240104	2024-01-05 02:25:25	2024-01-04 18:25:25	UT	MST	2024-01-04 11:25:25	6165	01/04/2024	11:25	353.2	352.6	320.191	173.501	0.458132	129.348	0.6	-1	3
25	GF5B_AHSI_W80.4_N39.2_20231012_011153_L10000404427	Harrison Power Station_20231012	Harrison Power Station	39.3844	-80.3325	GF5B	20231012	2023-10-13 00:23:33	2023-10-12 16:23:33	WV	EST	2023-10-12 11:23:33	3944	10/12/2023	11:23	229.9	228.3	208.005	290.279	0.395537	187.061	0.73	-1	3	伪排放
26	GF5B_AHSI_W85.2_N38.7_20231031_011430_L10000413176	Trimble County_20231031	Trimble County	38.5847	-85.4117	GF5B	20231031	2023-11-01 00:42:01	2023-10-31 16:42:01	KY	EST	2023-10-31 11:42:01	6071	10/31/2023	11:42	278.2	284.99	256.691	1307.57	4.09394	208.083	3.2	-1	2	探测到了，但算的不准（该案例说明GF5的探测下限达到256t/h, 3m/s）
27	GF5B_AHSI_W85.3_N38.7_20230714_009842_L10000360353	Trimble County_20230714	Trimble County	38.5847	-85.4117	GF5B	20230714	2023-07-15 00:42:09	2023-07-14 16:42:09	KY	EST	2023-07-14 11:42:09	6071	07/14/2023	11:42	1373.5	1399.05	1262.24	1503.31	0.190983	593.787	1.52	1	1
28	GF5B_AHSI_W88.6_N37.1_20231212_012042_L10000435322	Shawnee_20231212	Shawnee	37.1517	-88.775	GF5B	20231212	2023-12-13 00:54:21	2023-12-12 16:54:21	KY	CST	2023-12-12 10:54:21	1379	12/12/2023	10:54	943.299	928	843.255	636.308	0.245415	204.234	1.77	-1	0.5	羽流飘到了水面上，水汽干扰大
29	GF5B_AHSI_W88.6_N37.2_20220326_002922_L10000100107	Shawnee_20220326	Shawnee	37.1517	-88.775	GF5B	20220326	2022-03-27 00:46:28	2022-03-26 16:46:28	KY	CST	2022-03-26 10:46:28	1379	03/26/2022	10:46	811.401	780.998	714.945	2035.13	1.84656	195.68	5.61	-1	0.5	羽流飘到了水面上，水汽干扰大
30	GF5B_AHSI_W88.7_N37.2_20230825_010454_L10000380643	Shawnee_20230825	Shawnee	37.1517	-88.775	GF5B	20230825	2023-08-26 00:54:41	2023-08-25 16:54:41	KY	CST	2023-08-25 10:54:41	1379	08/25/2023	10:54	1266.6	1261.2	1144.63	1124.97	0.0171827	218.759	2.61	1	1	有排放，圆形，无羽流形状
31	GF5B_AHSI_W92.2_N34.3_20231006_011066_L10000401605	White Bluff_20231006	White Bluff	34.4236	-92.1392	GF5B	20231006	2023-10-07 01:05:59	2023-10-06 17:05:59	AR	CST	2023-10-06 11:05:59	6009	10/06/2023	11:05	320	380.1	294.843	947.363	2.21312	179.462	2.8	-1	0.5
32	GF5B_AHSI_W94.2_N45.6_20220602_003913_L10000141558	Sherburne County_20220602	Sherburne County	45.3792	-93.8958	GF5B	20220602	2022-06-03 01:19:01	2022-06-02 17:19:01	MN	CST	2022-06-02 11:19:01	6090	06/02/2022	11:19	411.9	411.2	373.468	994.39	1.66258	107.602	4.82	-1	0.5
33	GF5B_AHSI_W94.3_N32.3_20231103_011474_L10000414550	Martin Lake_20231103	Martin Lake	32.2597	-94.5703	GF5B	20231103	2023-11-04 01:12:54	2023-11-03 17:12:54	TX	CST	2023-11-03 11:12:54	6146	11/03/2023	11:12	1488.1	1487.9	1349.95	1250.81	0.0734347	276.173	2.34	1	1	有羽流，水面噪声大
34	GF5B_AHSI_W94.4_N32.3_20230906_010629_L10000386730	Martin Lake_20230906	Martin Lake	32.2597	-94.5703	GF5B	20230906	2023-09-07 01:13:22	2023-09-06 17:13:22	TX	CST	2023-09-06 11:13:22	6146	09/06/2023	11:13	2665.3	2675.5	2419.92	1027.35	0.575461	190.111	2.72	-1	-10	有一点点云；只有一点点排放，不构成羽流，算不准，靠近湖边
35	GF5B_AHSI_W94.5_N32.3_20220407_003097_L10000107611	Martin Lake_20220407	Martin Lake	32.2597	-94.5703	GF5B	20220407	2022-04-08 01:05:50	2022-04-07 17:05:50	TX	CST	2022-04-07 11:05:50	6146	04/07/2022	11:05	1469.4	1514	1336.39	884.859	0.337873	87.0666	6.16	-1	0.5
36	GF5B_AHSI_W94.5_N38.2_20221019_005938_L10000223276	La Cygne_20221019	La Cygne	38.3472	-94.6467	GF5B	20221019	2022-10-20 01:15:33	2022-10-19 17:15:33	KS	CST	2022-10-19 11:15:33	1241	10/19/2022	11:15	708.8	713.2	644.01	693.404	0.0766968	135.344	2.6	-1	1	32波段可见排放源
37	GF5B_AHSI_W96.5_N31.3_20221019_005938_L10000223290	Oak Grove_20221019	Oak Grove	31.185	-96.4853	GF5B	20221019	2022-10-20 01:17:28	2022-10-19 17:17:28	TX	CST	2022-10-19 11:17:28	6180	10/19/2022	11:17	1788.5	1803.2	1626.28	1808.22	0.111874	687.255	1.55	-1	1	有排放
38	GF5B_AHSI_W96.9_N29.8_20221019_005938_L10000223293	Sam Seymour_20221019	Sam Seymour	29.9172	-96.7506	GF5B	20221019	2022-10-20 01:17:53	2022-10-19 17:17:53	TX	CST	2022-10-19 11:17:53	6179	10/19/2022	11:17	964.3	979	878.577	1017.6	0.158239	192.883	2.61	-1	1
39	ZY1E_AHSI_W101.24_N41.04_20230805_020428_L1A0000637084	Gerald Gentleman Station_20230805	Gerald Gentleman Station	41.0808	-101.141	ZY1E	20230805	2023-08-05 17:48:20	2023-08-05 17:48:20	NE	CST	2023-08-05 11:48:20	6077	08/05/2023	11:48	1358.5	1357.1	1231.39	816.682	0.336783	82.7517	6.02	-1	0.5
40	ZY1E_AHSI_W101.46_N35.28_20220305_012995_L1A0000414997	Harrington Station_20220305	Harrington Station	35.2972	-101.748	ZY1E	20220305	2022-03-05 17:52:24	2022-03-05 17:52:24	TX	CST	2022-03-05 11:52:24	6193	03/05/2022	11:52	167.2	177.3	159.622	123.741	0.224786	12.6437	10.76	1	0	排放强度太低了，无法检测到
41	ZY1E_AHSI_W101.95_N35.28_20220331_013368_L1A0000427095	Harrington Station_20220331	Harrington Station	35.2972	-101.748	ZY1E	20220331	2022-03-31 17:54:08	2022-03-31 17:54:08	TX	CST	2022-03-31 11:54:08	6193	03/31/2022	11:54	641.9	638.7	579.709	610.772	0.0535839	61.261	5.28	1	1
42	ZY1E_AHSI_W101.95_N47.64_20201123_006296_L1A0000193277	Antelope Valley_20201123	Antelope Valley	47.371	-101.836	ZY1E	20201123	2020-11-23 18:05:58	2020-11-23 18:05:58	ND	CST	2020-11-23 12:05:58	6469	11/23/2020	12:05	372.7	365.9	337.594	322.52	0.0446503	42.1978	6.44	-1	0	这一景还是不太好反演
43	ZY1E_AHSI_W104.76_N41.92_20230917_021045_L1A0000655064	Laramie River_20230917	Laramie River	42.1103	-104.883	ZY1E	20230917	2023-09-17 18:02:08	2023-09-17 18:02:08	WY	MST	2023-09-17 11:02:08	6204	09/17/2023	11:02	1667.1	1881.6	1518.85	1415.03	0.0683539	114.764	7.79	-1	1	羽流良好
44	ZY1E_AHSI_W104.93_N41.92_20230625_019840_L1A0000620580	Laramie River_20230625	Laramie River	42.1103	-104.883	ZY1E	20230625	2023-06-25 18:05:08	2023-06-25 18:05:08	WY	MST	2023-06-25 11:05:08	6204	06/25/2023	11:05	1043.4	1114.7	951.947	1081.42	0.136009	215.711	2.52	1	1	有排放
45	ZY1E_AHSI_W105.13_N42.36_20200825_005004_L1A0000136593	Laramie River_20200825	Laramie River	42.1103	-104.883	ZY1E	20200825	2020-08-25 18:10:51	2020-08-25 18:10:51	WY	MST	2020-08-25 11:10:51	6204	08/25/2020	11:10	520.3	520.5	472.038	547.477	0.159815	86.6912	3.13	-1	1
46	ZY1E_AHSI_W107.47_N40.60_20231007_021332_L1A0000663395	Craig_20231007	Craig	40.4627	-107.591	ZY1E	20231007	2023-10-07 18:11:00	2023-10-07 18:11:00	CO	MST	2023-10-07 11:11:00	6021	10/07/2023	11:11	487.2	518.1	447.12	498.346	0.114569	204.611	1.36	-1	3	有排放 不像羽流
47	ZY1E_AHSI_W107.63_N40.60_20230715_020127_L1A0000628485	Craig_20230715	Craig	40.4627	-107.591	ZY1E	20230715	2023-07-15 18:14:00	2023-07-15 18:14:00	CO	MST	2023-07-15 11:14:00	6021	07/15/2023	11:14	892.4	903.4	811.9	795.571	0.0201121	140.603	2.81	-1	1	19波段较好
48	ZY1E_AHSI_W108.64_N36.61_20200917_005334_L1A0000154763	Four Corners Steam Elec Station_20200917	Four Corners Steam Elec Station	36.69	-108.481	ZY1E	20200917	2020-09-17 18:19:28	2020-09-17 18:19:28	NM	MST	2020-09-17 11:19:28	2442	09/17/2020	11:19	1507.6	1506	1367.21	900.085	0.341664	163.051	2.71	-1	1	羽流形状好
49	ZY1E_AHSI_W108.68_N41.92_20200911_005248_L1A0000148906	Jim Bridger_20200911	Jim Bridger	41.7378	-108.787	ZY1E	20200911	2020-09-11 18:24:53	2020-09-11 18:24:53	WY	MST	2020-09-11 11:24:53	8066	09/11/2020	11:24	1437.4	1314.4	1259.35	1261.15	0.00142233	104.584	7.11	-1	1	排放位置在山上，不像排放源
50	ZY1E_AHSI_W108.72_N36.61_20231007_021332_L1A0000663404	Four Corners Steam Elec Station_20231007	Four Corners Steam Elec Station	36.69	-108.481	ZY1E	20231007	2023-10-07 18:12:07	2023-10-07 18:12:07	NM	MST	2023-10-07 11:12:07	2442	10/07/2023	11:12	1532.3	1509.9	1386.01	940.146	0.321692	309.59	1.7	1	1	羽流很完整，可以作为案例
51	ZY1E_AHSI_W108.78_N41.92_20200813_004832_L1A0000126505	Jim Bridger_20200813	Jim Bridger	41.7378	-108.787	ZY1E	20200813	2020-08-13 18:24:46	2020-08-13 18:24:46	WY	MST	2020-08-13 11:24:46	8066	08/13/2020	11:24	1902.1	1640.8	1630.74	987.957	0.394166	96.1528	5.41	1	0.5	羽流形状很好，不过怎么风速有点问题
52	ZY1E_AHSI_W111.21_N39.27_20201004_005578_L1A0000168618	Hunter_20201004	Hunter	39.1747	-111.029	ZY1E	20201004	2020-10-04 18:32:36	2020-10-04 18:32:36	UT	MST	2020-10-04 11:32:36	6165	10/04/2020	11:32	656	681.6	607.499	502.745	0.172435	123.959	2.13	-1	1	完美
53	ZY1E_AHSI_W111.31_N39.27_20200905_005163_L1A0000144224	Hunter_20200905	Hunter	39.1747	-111.029	ZY1E	20200905	2020-09-05 18:32:32	2020-09-05 18:32:32	UT	MST	2020-09-05 11:32:32	6165	09/05/2020	11:32	1057.9	1295.6	1074.72	489.72	0.544327	138.384	1.91	1	0.5	有羽流
54	ZY1E_AHSI_W80.32_N39.27_20220828_015517_L1A0000495655	Harrison Power Station_20220828	Harrison Power Station	39.3844	-80.3325	ZY1E	20220828	2022-08-28 16:29:54	2022-08-28 16:29:54	WV	EST	2022-08-28 11:29:54	3944	08/28/2022	11:29	2026.3	2030.1	1839.89	509.52	0.723071	133.621	2.02	1	-10	第2种波段选取未反演到排放；数据问题
55	ZY1E_AHSI_W85.49_N38.38_20220327_013308_L1A0000425150	Trimble County_20220327	Trimble County	38.5847	-85.4117	ZY1E	20220327	2022-03-27 16:51:14	2022-03-27 16:51:14	KY	EST	2022-03-27 11:51:14	6071	03/27/2022	11:51	412.9	409.2	371.723	445.15	0.197529	67.2422	3.62	-1	0
56	ZY1E_AHSI_W86.17_N36.17_20220327_013308_L1A0000425155	Gallatin_20220327	Gallatin	36.3156	-86.4006	ZY1E	20220327	2022-03-27 16:51:51	2022-03-27 16:51:51	TN	CST	2022-03-27 10:51:51	3403	03/27/2022	10:51	307	306.4	278.043	277.744	0.0010745	63.339	2.48	-1	0
57	ZY1E_AHSI_W86.59_N36.17_20221004_016048_L1A0000511602	Gallatin_20221004	Gallatin	36.3156	-86.4006	ZY1E	20221004	2022-10-04 16:51:33	2022-10-04 16:51:33	TN	CST	2022-10-04 10:51:33	3403	10/04/2022	10:51	758.6	764.3	692.586	978.408	0.412688	383.16	1.48	-1	0.5	像伪排放源
58	ZY1E_AHSI_W88.57_N37.06_20211102_011228_L1A0000359594	Shawnee_20211102	Shawnee	37.1517	-88.775	ZY1E	20211102	2021-11-02 17:02:50	2021-11-02 17:02:50	KY	CST	2021-11-02 11:02:50	1379	11/02/2021	11:02	430.399	432.9	390.527	918.366	1.35161	161.663	3.01	1	-10	伪排放
59	ZY1E_AHSI_W88.87_N37.06_20211128_011601_L1A0000371189	Shawnee_20211128	Shawnee	37.1517	-88.775	ZY1E	20211128	2021-11-28 17:03:59	2021-11-28 17:03:59	KY	CST	2021-11-28 11:03:59	1379	11/28/2021	11:03	406.4	406.4	368.68	450.286	0.221346	74.0856	3.51	1	0.5	有排放
60	ZY1E_AHSI_W88.95_N37.06_20210119_007111_L1A0000229838	Shawnee_20210119	Shawnee	37.1517	-88.775	ZY1E	20210119	2021-01-19 17:02:53	2021-01-19 17:02:53	KY	CST	2021-01-19 11:02:53	1379	01/19/2021	11:02	868.501	669.401	781.87	784.206	0.00298707	297.854	1.57	1	1	右下角伪排放源
61	ZY1E_AHSI_W89.08_N37.06_20201221_006696_L1A0000212411	Shawnee_20201221	Shawnee	37.1517	-88.775	ZY1E	20201221	2020-12-21 17:03:04	2020-12-21 17:03:04	KY	CST	2020-12-21 11:03:04	1379	12/21/2020	11:03	386.9	386.599	350.976	454.212	0.294138	60.4141	6.44	-1	0.5
62	ZY1E_AHSI_W90.79_N38.83_20210925_010683_L1A0000340283	Labadie_20210925	Labadie	38.5583	-90.8361	ZY1E	20210925	2021-09-25 17:13:23	2021-09-25 17:13:23	MO	CST	2021-09-25 11:13:23	2103	09/25/2021	11:13	1746.6	1732.6	1581.74	688.016	0.565025	124.946	2.94	1	1
63	ZY1E_AHSI_W90.90_N38.38_20220113_012261_L1A0000391512	Labadie_20220113	Labadie	38.5583	-90.8361	ZY1E	20220113	2022-01-13 17:13:19	2022-01-13 17:13:19	MO	CST	2022-01-13 11:13:19	2103	01/13/2022	11:13	1841.4	1849.6	1672.1	661.306	0.604506	222.228	1.73	-1	1
64	ZY1E_AHSI_W90.98_N38.38_20230329_018573_L1A0000585856	Labadie_20230329	Labadie	38.5583	-90.8361	ZY1E	20230329	2023-03-29 17:07:56	2023-03-29 17:07:56	MO	CST	2023-03-29 11:07:56	2103	03/29/2023	11:07	2464.5	2453.2	2234.56	2022.13	0.095067	745.264	1.58	-1	0.5	羽流沿着江面规整陈列
65	ZY1E_AHSI_W91.94_N34.40_20220726_015044_L1A0000481359	White Bluff_20220726	White Bluff	34.4236	-92.1392	ZY1E	20220726	2022-07-26 17:12:13	2022-07-26 17:12:13	AR	CST	2022-07-26 11:12:13	6009	07/26/2022	11:12	1389.4	1742.2	1324.45	1214.94	0.0826837	193.477	3.26	-1	1	微弱的排放
66	ZY1E_AHSI_W92.11_N34.40_20220113_012261_L1A0000391521	White Bluff_20220113	White Bluff	34.4236	-92.1392	ZY1E	20220113	2022-01-13 17:14:27	2022-01-13 17:14:27	AR	CST	2022-01-13 11:14:27	6009	01/13/2022	11:14	901.3	897.1	816.757	667.412	0.182851	162.522	2.28	-1	0	没有排放
67	ZY1E_AHSI_W92.15_N34.40_20220309_013050_L1A0000416988	White Bluff_20220309	White Bluff	34.4236	-92.1392	ZY1E	20220309	2022-03-09 17:14:19	2022-03-09 17:14:19	AR	CST	2022-03-09 11:14:19	6009	03/09/2022	11:14	280.3	279.1	254.03	1031.35	3.05994	185.683	2.83	1	0.5	很多云，不适合反演
68	ZY1E_AHSI_W92.33_N34.40_20231104_021729_L1A0000674441	White Bluff_20231104	White Bluff	34.4236	-92.1392	ZY1E	20231104	2023-11-04 17:03:42	2023-11-04 17:03:42	AR	CST	2023-11-04 11:03:42	6009	11/04/2023	11:03	537.3	433.2	482.708	464.969	0.0367491	263.372	0.86	-1	1
69	ZY1E_AHSI_W93.56_N45.45_20220320_013210_L1A0000421897	Sherburne County_20220320	Sherburne County	45.3792	-93.8958	ZY1E	20220320	2022-03-20 17:31:14	2022-03-20 17:31:14	MN	CST	2022-03-20 11:31:14	6090	03/20/2022	11:31	1451.2	1311.2	1250.89	755.283	0.396202	218.997	1.91	-1	0.5
70	ZY1E_AHSI_W94.02_N45.45_20220927_015948_L1A0000508557	Sherburne County_20220927	Sherburne County	45.3792	-93.8958	ZY1E	20220927	2022-09-27 17:31:08	2022-09-27 17:31:08	MN	CST	2022-09-27 11:31:08	6090	09/27/2022	11:31	1052.9	1052.9	955.175	1657.36	0.735137	257.031	3.34	-1	0.5	有羽流
71	ZY1E_AHSI_W94.33_N38.38_20211206_011716_L1A0000374910	La Cygne_20211206	La Cygne	38.3472	-94.6467	ZY1E	20211206	2021-12-06 17:27:03	2021-12-06 17:27:03	KS	CST	2021-12-06 11:27:03	1241	12/06/2021	11:27	365.5	442.9	363.173	651.11	0.792835	82.9324	4.78	1	0.5
72	ZY1E_AHSI_W94.40_N32.17_20210401_008144_L1A0000261751	Martin Lake_20210401	Martin Lake	32.2597	-94.5703	ZY1E	20210401	2021-04-01 17:20:59	2021-04-01 17:20:59	TX	CST	2021-04-01 11:20:59	6146	04/01/2021	11:20	1201.3	1170.4	1080.46	1015.03	0.0605533	169.449	3.06	1	1	有羽流
73	ZY1E_AHSI_W94.44_N38.38_20210913_010511_L1A0000334632	La Cygne_20210913	La Cygne	38.3472	-94.6467	ZY1E	20210913	2021-09-13 17:27:32	2021-09-13 17:27:32	KS	CST	2021-09-13 11:27:32	1241	09/13/2021	11:27	662.6	671	604.53	752.327	0.244483	92.3671	5.41	-1	0.5
74	ZY1E_AHSI_W94.49_N38.38_20200711_004357_L1A0000107667	La Cygne_20200711	La Cygne	38.3472	-94.6467	ZY1E	20200711	2020-07-11 17:23:19	2020-07-11 17:23:19	KS	CST	2020-07-11 11:23:19	1241	07/11/2020	11:23	1601.4	1598	1451.58	2480.95	0.709135	452.635	2.72	1	1	反演效果不好，只有一团排放；感觉有点像是把水汽也核算进去了，偏高很多；误差太大了
75	ZY1E_AHSI_W94.59_N32.17_20220303_012967_L1A0000414108	Martin Lake_20220303	Martin Lake	32.2597	-94.5703	ZY1E	20220303	2022-03-03 17:22:15	2022-03-03 17:22:15	TX	CST	2022-03-03 11:22:15	6146	03/03/2022	11:22	1866.9	1838.5	1684.18	608.551	0.638665	460.783	0.58	-1	2	这一景本应该能够看到完美羽流的，但是羽流的方向刚好经过了湖面，导致出现一段非常大的异常高值
76	ZY1E_AHSI_W94.77_N32.17_20210104_006896_L1A0000221658	Martin Lake_20210104	Martin Lake	32.2597	-94.5703	ZY1E	20210104	2021-01-04 17:21:40	2021-01-04 17:21:40	TX	CST	2021-01-04 11:21:40	6146	01/04/2021	11:21	1286	1418.3	1208.65	912.298	0.24519	254.975	1.96	-1	0	水汽干扰大，几乎无反演结果
77	ZY1E_AHSI_W96.19_N31.29_20220130_012507_L1A0000399543	Oak Grove_20220130	Oak Grove	31.185	-96.4853	ZY1E	20220130	2022-01-30 17:28:05	2022-01-30 17:28:05	TX	CST	2022-01-30 11:28:05	6180	01/30/2022	11:28	1396	1398.9	1267.66	1163.5	0.0821662	134.467	4.62	1	1
78	ZY1E_AHSI_W96.23_N31.29_20220326_013296_L1A0000424559	Oak Grove_20220326	Oak Grove	31.185	-96.4853	ZY1E	20220326	2022-03-26 17:27:55	2022-03-26 17:27:55	TX	CST	2022-03-26 11:27:55	6180	03/26/2022	11:27	767.3	835.6	723.965	975.038	0.346802	148.983	3.3	-1	1
79	ZY1E_AHSI_W96.26_N31.29_20201006_005607_L1A0000169633	Oak Grove_20201006	Oak Grove	31.185	-96.4853	ZY1E	20201006	2020-10-06 17:25:38	2020-10-06 17:25:38	TX	CST	2020-10-06 11:25:38	6180	10/06/2020	11:25	1874.4	1879.2	1702.24	1883.54	0.106508	521.576	1.93	-1	1	有排放，无羽流
80	ZY1E_AHSI_W96.28_N31.29_20210424_008474_L1A0000271419	Oak Grove_20210424	Oak Grove	31.185	-96.4853	ZY1E	20210424	2021-04-24 17:27:56	2021-04-24 17:27:56	TX	CST	2021-04-24 11:27:56	6180	04/24/2021	11:27	893.6	900.9	813.64	930.324	0.143409	94.1034	5.95	1	1	偏高
81	ZY1E_AHSI_W96.41_N31.29_20211206_011716_L1A0000374926	Oak Grove_20211206	Oak Grove	31.185	-96.4853	ZY1E	20211206	2021-12-06 17:29:06	2021-12-06 17:29:06	TX	CST	2021-12-06 11:29:06	6180	12/06/2021	11:29	1798.7	1790.1	1627.98	2252.21	0.383437	187.286	7.76	-1	1	有一点点羽流
82	ZY1E_AHSI_W96.55_N29.95_20220130_012507_L1A0000399546	Sam Seymour_20220130	Sam Seymour	29.9172	-96.7506	ZY1E	20220130	2022-01-30 17:28:28	2022-01-30 17:28:28	TX	CST	2022-01-30 11:28:28	6179	01/30/2022	11:28	1394.8	1390.4	1263.48	844.457	0.331641	151.607	2.83	-1	0.5
83	ZY1E_AHSI_W96.58_N31.29_20200711_004359_L1A0000107694	Oak Grove_20200711	Oak Grove	31.185	-96.4853	ZY1E	20200711	2020-07-11 17:25:19	2020-07-11 17:25:19	TX	CST	2020-07-11 11:25:19	6180	07/11/2020	11:25	1869.6	1875.6	1698.34	1954.66	0.150921	295.472	3.26	-1	1	羽流可以
84	ZY1E_AHSI_W96.59_N29.95_20220326_013296_L1A0000424562	Sam Seymour_20220326	Sam Seymour	29.9172	-96.7506	ZY1E	20220326	2022-03-26 17:28:17	2022-03-26 17:28:17	TX	CST	2022-03-26 11:28:17	6179	03/26/2022	11:28	1765.4	1773.9	1605.14	932.652	0.41896	121.923	3.98	1	0.5	能看到排放，但羽流飘到了湖面上
85	ZY1E_AHSI_W96.65_N29.95_20210424_008474_L1A0000271422	Sam Seymour_20210424	Sam Seymour	29.9172	-96.7506	ZY1E	20210424	2021-04-24 17:28:19	2021-04-24 17:28:19	TX	CST	2021-04-24 11:28:19	6179	04/24/2021	11:28	1037.5	1164.7	995.055	1096.1	0.101543	102.807	6.15	-1	1
86	ZY1E_AHSI_W96.74_N31.10_20200612_003941_L1A0000093912	Oak Grove_20200612	Oak Grove	31.185	-96.4853	ZY1E	20200612	2020-06-12 17:25:12	2020-06-12 17:25:12	TX	CST	2020-06-12 11:25:12	6180	06/12/2020	11:25	1759.1	1762.5	1597.11	2294.64	0.436741	287.554	4	1	1	排放羽流很清晰
87	ZY1E_AHSI_W96.95_N29.95_20200711_004359_L1A0000107697	Sam Seymour_20200711	Sam Seymour	29.9172	-96.7506	ZY1E	20200711	2020-07-11 17:25:42	2020-07-11 17:25:42	TX	CST	2020-07-11 11:25:42	6179	07/11/2020	11:25	1793.1	1824.9	1638.69	1304.62	0.203867	227.911	2.82	-1	1	有羽流，还不错，飘到水面上了，前16波段清晰；作为强吸收和弱吸收的案例
88	ZY1E_AHSI_W97.05_N29.95_20200612_003941_L1A0000093915	Sam Seymour_20200612	Sam Seymour	29.9172	-96.7506	ZY1E	20200612	2020-06-12 17:25:31	2020-06-12 17:25:31	TX	CST	2020-06-12 11:25:31	6179	06/12/2020	11:25	1467.5	1562.8	1367.32	1639.83	0.199305	221.633	3.64	1	1	羽流形状很好，可以作为案例
89	ZY1E_AHSI_W98.07_N29.51_20220930_015991_L1A0000509878	J K Spruce_20220930	J K Spruce	29.3091	-98.3205	ZY1E	20220930	2022-09-30 17:31:53	2022-09-30 17:31:53	TX	CST	2022-09-30 11:31:53	7097	09/30/2022	11:31	1501.1	1499.5	1361.03	1377.82	0.0123386	495.526	1.61	-1	1	有噪声，有羽流
90	ZY1E_AHSI_W98.20_N29.06_20220418_013626_L1A0000435959	J K Spruce_20220418	J K Spruce	29.3091	-98.3205	ZY1E	20220418	2022-04-18 17:33:49	2022-04-18 17:33:49	TX	CST	2022-04-18 11:33:49	7097	04/18/2022	11:33	629.1	628.9	570.61	717.777	0.257912	68.5588	6.44	1	1
91	ZY1E_AHSI_W98.50_N29.51_20200930_005521_L1A0000170469	J K Spruce_20200930	J K Spruce	29.3091	-98.3205	ZY1E	20200930	2020-09-30 17:33:03	2020-09-30 17:33:03	TX	CST	2020-09-30 11:33:03	7097	09/30/2020	11:33	914.9	958.2	851.588	1225.33	0.438878	192.292	3.18	1	1
92	ZY1E_AHSI_W98.51_N29.06_20201029_005935_L1A0000194928	J K Spruce_20201029	J K Spruce	29.3091	-98.3205	ZY1E	20201029	2020-10-29 17:33:12	2020-10-29 17:33:12	TX	CST	2020-10-29 11:33:12	7097	10/29/2020	11:33	508.1	564.9	489.281	537.164	0.0978634	52.3128	7.17	-1	1	有团块排放
93	ZY1E_AHSI_W98.53_N29.51_20220514_013997_L1A0000447750	J K Spruce_20220514	J K Spruce	29.3091	-98.3205	ZY1E	20220514	2022-05-14 17:35:16	2022-05-14 17:35:16	TX	CST	2022-05-14 11:35:16	7097	05/14/2022	11:35	1041	1035.2	941.31	1396.6	0.483677	339.874	2.12	-1	1
94	ZY1F_AHSI_W101.04_N41.04_20230916_009032_L1A0000537816	Gerald Gentleman Station_20230916	Gerald Gentleman Station	41.0808	-101.141	ZY1F	20230916	2023-09-16 18:00:26	2023-09-16 18:00:26	NE	CST	2023-09-16 12:00:26	6077	09/16/2023	12:00	1330.8	1109.2	1207.28	815.545	0.324478	106.455	3.96	1	0.5
95	ZY1F_AHSI_W101.05_N41.04_20231110_009821_L1A0000582861	Gerald Gentleman Station_20231110	Gerald Gentleman Station	41.0808	-101.141	ZY1F	20231110	2023-11-10 18:01:07	2023-11-10 18:01:07	NE	CST	2023-11-10 12:01:07	6077	11/10/2023	12:01	1304.1	1307.4	1183.11	802.109	0.322033	86.7146	4.88	1	1
96	ZY1F_AHSI_W101.48_N41.04_20230624_007827_L1A0000469131	Gerald Gentleman Station_20230624	Gerald Gentleman Station	41.0808	-101.141	ZY1F	20230624	2023-06-24 18:00:53	2023-06-24 18:00:53	NE	CST	2023-06-24 12:00:53	6077	06/24/2023	12:00	688	687.2	624.143	579.361	0.0717502	48.1986	7.6	1	1	10波段效果好
97	ZY1F_AHSI_W104.83_N41.92_20230930_009233_L1A0000549577	Laramie River_20230930	Laramie River	42.1103	-104.883	ZY1F	20230930	2023-09-30 18:16:43	2023-09-30 18:16:43	WY	MST	2023-09-30 11:16:43	6204	09/30/2023	11:16	798.9	661.1	691.414	704.928	0.0195463	104.344	3.4	-1	1	有羽流
98	ZY1F_AHSI_W107.55_N40.59_20231020_009525_L1A0000564874	Craig_20231020	Craig	40.4627	-107.591	ZY1F	20231020	2023-10-20 18:26:24	2023-10-20 18:26:24	CO	MST	2023-10-20 11:26:24	6021	10/20/2023	11:26	729.3	742.5	666.799	27.5001	0.958758	27.9707	0.42	1	2	22有一个羽流 24双羽流0.001
99	ZY1F_AHSI_W110.71_N39.27_20230817_008602_L1A0000512937	Hunter_20230817	Hunter	39.1747	-111.029	ZY1F	20230817	2023-08-17 18:36:51	2023-08-17 18:36:51	UT	MST	2023-08-17 11:36:51	6165	08/17/2023	11:36	654	651.7	592.047	572.881	0.0323714	144.665	2.06	1	1
100	ZY1F_AHSI_W110.73_N39.27_20230623_007813_L1A0000468861	Hunter_20230623	Hunter	39.1747	-111.029	ZY1F	20230623	2023-06-23 18:36:03	2023-06-23 18:36:03	UT	MST	2023-06-23 11:36:03	6165	06/23/2023	11:36	422.6	419.8	381.852	488.826	0.280146	46.5609	6.19	-1	0.5	有点不像
101	ZY1F_AHSI_W111.15_N39.27_20230719_008186_L1A0000490264	Hunter_20230719	Hunter	39.1747	-111.029	ZY1F	20230719	2023-07-19 18:38:10	2023-07-19 18:38:10	UT	MST	2023-07-19 11:38:10	6165	07/19/2023	11:38	656.412	749.552	649.001	154.15	0.762481	131.802	0.5	1	2	清晰完美
102	ZY1F_AHSI_W80.08_N39.27_20220621_002553_L1A0000190867	Harrison Power Station_20220621	Harrison Power Station	39.3844	-80.3325	ZY1F	20220621	2022-06-21 16:24:44	2022-06-21 16:24:44	WV	EST	2022-06-21 11:24:44	3944	06/21/2022	11:24	1900.6	2008.4	1763.31	1635.54	0.0724611	353.636	2.33	1	1	非常清晰
103	ZY1F_AHSI_W80.61_N39.27_20230418_006865_L1A0000414746	Harrison Power Station_20230418	Harrison Power Station	39.3844	-80.3325	ZY1F	20230418	2023-04-18 16:34:27	2023-04-18 16:34:27	WV	EST	2023-04-18 11:34:27	3944	04/18/2023	11:34	631.6	618	565.987	602.945	0.0652999	59.86	5.73	-1	1
104	ZY1F_AHSI_W86.57_N36.17_20230305_006234_L1A0000379047	Gallatin_20230305	Gallatin	36.3156	-86.4006	ZY1F	20230305	2023-03-05 16:54:32	2023-03-05 16:54:32	TN	CST	2023-03-05 10:54:32	3403	03/05/2023	10:54	278.3	276	250.592	220.65	0.119486	49.8318	2.5	-1	0	无排放
105	ZY1F_AHSI_W88.63_N37.05_20231031_009677_L1A0000574307	Shawnee_20231031	Shawnee	37.1517	-88.775	ZY1F	20231031	2023-10-31 17:07:20	2023-10-31 17:07:20	KY	CST	2023-10-31 11:07:20	1379	10/31/2023	11:07	879.1	888.799	798.533	584.255	0.26834	90.5014	3.6	-1	0	羽流飘到了水面上，水汽干扰大
106	ZY1F_AHSI_W90.79_N38.83_20230704_007970_L1A0000476992	Labadie_20230704	Labadie	38.5583	-90.8361	ZY1F	20230704	2023-07-04 17:16:01	2023-07-04 17:16:01	MO	CST	2023-07-04 11:16:01	2103	07/04/2023	11:16	2560.7	2558.1	2322.4	2252.28	0.0301946	464.656	2.41	-1	1	构成羽流，有排放
107	ZY1F_AHSI_W90.93_N38.38_20231022_009549_L1A0000565683	Labadie_20231022	Labadie	38.5583	-90.8361	ZY1F	20231022	2023-10-22 17:17:43	2023-10-22 17:17:43	MO	CST	2023-10-22 11:17:43	2103	10/22/2023	11:17	2197.7	2194	1992.77	506.287	0.745938	148.862	1.92	1	0.5	受江水影响较大
108	ZY1F_AHSI_W93.93_N45.45_20220721_002978_L1A0000173921	Sherburne County_20220721	Sherburne County	45.3792	-93.8958	ZY1F	20220721	2022-07-21 17:27:56	2022-07-21 17:27:56	MN	CST	2022-07-21 11:27:56	6090	07/21/2022	11:27	2400.9	2419.9	2185.82	2588.64	0.184291	239.32	5.9	1	1	适合作为反演案例
109	ZY1F_AHSI_W94.55_N32.17_20231210_010251_L1A0000608285	Martin Lake_20231210	Martin Lake	32.2597	-94.5703	ZY1F	20231210	2023-12-10 17:27:08	2023-12-10 17:27:08	TX	CST	2023-12-10 11:27:08	6146	12/10/2023	11:27	1027.6	1026.4	931.733	1050.18	0.127129	122.473	4.79	-1	1	有羽流
110	ZY1F_AHSI_W94.55_N38.38_20220920_003853_L1A0000229994	La Cygne_20220920	La Cygne	38.3472	-94.6467	ZY1F	20220920	2022-09-20 17:24:31	2022-09-20 17:24:31	KS	CST	2022-09-20 11:24:31	1241	09/20/2022	11:24	759.1	765.6	691.003	880.415	0.274113	96.5914	5.01	1	0.5	水汽影响太大了
111	ZY1F_AHSI_W94.56_N38.38_20230816_008587_L1A0000512042	La Cygne_20230816	La Cygne	38.3472	-94.6467	ZY1F	20230816	2023-08-16 17:31:23	2023-08-16 17:31:23	KS	CST	2023-08-16 11:31:23	1241	08/16/2023	11:31	1273.7	1441.1	1233.94	696.216	0.43578	126.552	2.8	1	0.5	飘到湖面上了
112	ZY1F_AHSI_W94.57_N32.17_20220802_003150_L1A0000184740	Martin Lake_20220802	Martin Lake	32.2597	-94.5703	ZY1F	20220802	2022-08-02 17:17:29	2022-08-02 17:17:29	TX	CST	2022-08-02 11:17:29	6146	08/02/2022	11:17	2263.6	2623.6	2146.04	2202.6	0.0263559	319.706	3.39	-1	0.5	有排放，圆形，堆叠状，飘到湖面上
113	ZY1F_AHSI_W94.58_N38.38_20230108_005431_L1A0000329362	La Cygne_20230108	La Cygne	38.3472	-94.6467	ZY1F	20230108	2023-01-08 17:27:27	2023-01-08 17:27:27	KS	CST	2023-01-08 11:27:27	1241	01/08/2023	11:27	1406.5	1398.2	1272.57	330.144	0.740568	149.709	1.2	1	0.5	噪声较大
114	ZY1F_AHSI_W94.61_N32.17_20221120_004728_L1A0000290523	Martin Lake_20221120	Martin Lake	32.2597	-94.5703	ZY1F	20221120	2022-11-20 17:20:45	2022-11-20 17:20:45	TX	CST	2022-11-20 11:20:45	6146	11/20/2022	11:20	2635.2	2664.4	2399.44	2356.54	0.0178808	394.781	2.97	-1	1	有一点羽流比较稀疏
115	ZY1F_AHSI_W96.64_N31.29_20220727_003064_L1A0000178119	Oak Grove_20220727	Oak Grove	31.185	-96.4853	ZY1F	20220727	2022-07-27 17:24:51	2022-07-27 17:24:51	TX	CST	2022-07-27 11:24:51	6180	07/27/2022	11:24	1241	1493.7	1217.51	1001.71	0.177246	131.681	3.79	-1	1
116	ZY1F_AHSI_W96.65_N31.29_20230304_006220_L1A0000378222	Oak Grove_20230304	Oak Grove	31.185	-96.4853	ZY1F	20230304	2023-03-04 17:30:35	2023-03-04 17:30:35	TX	CST	2023-03-04 11:30:35	6180	03/04/2023	11:30	650.4	654.3	591.802	782.908	0.322922	104.598	3.8	-1	1	被云挡住了
117	ZY1F_AHSI_W96.65_N31.29_20230816_008587_L1A0000512058	Oak Grove_20230816	Oak Grove	31.185	-96.4853	ZY1F	20230816	2023-08-16 17:33:23	2023-08-16 17:33:23	TX	CST	2023-08-16 11:33:23	6180	08/16/2023	11:33	1820.5	1806.6	1644.59	1819.92	0.106607	343.852	2.6	-1	1	羽流很好，简直完美！！！适合作为案例
118	ZY1F_AHSI_W96.67_N31.29_20230108_005431_L1A0000329378	Oak Grove_20230108	Oak Grove	31.185	-96.4853	ZY1F	20230108	2023-01-08 17:29:27	2023-01-08 17:29:27	TX	CST	2023-01-08 11:29:27	6180	01/08/2023	11:29	1957.3	1974.5	1783.17	1808.36	0.014123	207.56	4.4	1	1	有羽流，水池下方有一个点源
119	ZY1F_AHSI_W97.01_N29.95_20230304_006220_L1A0000378225	Sam Seymour_20230304	Sam Seymour	29.9172	-96.7506	ZY1F	20230304	2023-03-04 17:30:57	2023-03-04 17:30:57	TX	CST	2023-03-04 11:30:57	6179	03/04/2023	11:30	672.8	881.2	704.883	1119.1	0.587645	184.061	3.01	-1	0.5
120	ZY1F_AHSI_W97.01_N29.95_20230816_008587_L1A0000512061	Sam Seymour_20230816	Sam Seymour	29.9172	-96.7506	ZY1F	20230816	2023-08-16 17:33:45	2023-08-16 17:33:45	TX	CST	2023-08-16 11:33:45	6179	08/16/2023	11:33	1354.8	1363.7	1233.49	1196.47	0.0300137	252.886	2.37	1	1
121	ZY1F_AHSI_W98.47_N29.51_20221013_004183_L1A0000250381	J K Spruce_20221013	J K Spruce	29.3091	-98.3205	ZY1F	20221013	2022-10-13 17:33:02	2022-10-13 17:33:02	TX	CST	2022-10-13 11:33:02	7097	10/13/2022	11:33	1492.3	1495.9	1355.59	1427.42	0.0529872	135.627	5.76	1	1	噪声较大

## Sheet: 2024.10 (2)
序号	filename	foldername	Facility Name	Latitude	Longitude	satellite	date	Time of Satellite	UTC	State	Zone	Local Standard Time	Facility ID	day LST	time	前整点Q	后整点Q	avg Q(ton/h)	反演结果	反演误差	不确定度	风速	提取	排放	备注
1	GF5_AHSI_W107.84_N40.19_20190803_006569_L10000052859	Craig_20190802	Craig	40.4627	-107.591	GF5	20190803	2019-08-03 04:08:09	2019-08-02 20:08:09	CO	MST	2019-08-02 13:08:09	6021	08/02/2019	13:08	1356.3	1381	1233.4	1191.19	0.0342232	182.627	3.26	-1	1
2	GF5_AHSI_W111.09_N39.21_20191118_008126_L10000065664	Hunter_20191118	Hunter	39.1747	-111.029	GF5	20191118	2019-11-18 04:20:29	2019-11-17 20:20:29	UT	MST	2019-11-17 13:20:29	6165	11/17/2019	13:20	889	885.7	805.489	168.026	0.791399	29.5385	0.91	1	0
3	GF5_AHSI_W85.14_N38.72_20191225_008664_L10000068784	Trimble County_20191225	Trimble County	38.5847	-85.4117	GF5	20191225	2019-12-25 02:36:43	2019-12-24 18:36:43	KY	EST	2019-12-24 13:36:43	6071	12/24/2019	13:36	1037.4	1080.8	964.737	830.118	0.13954	403.987	1.06	-1	1
4	GF5A_AHSI_W108.6_N36.7_20231227_005597_L10000078715	Four Corners Steam Elec Station_20231227	Four Corners Steam Elec Station	36.69	-108.481	GF5A	20231227	2023-12-27 20:12:59	2023-12-27 20:12:59	NM	MST	2023-12-27 13:12:59	2442	12/27/2023	13:12	797	796.8	722.99	611.358	0.154403	79.6041	4.38	-1	1
5	GF5A_AHSI_W108.7_N41.7_20231213_005393_L10000074107	Jim Bridger_20231213	Jim Bridger	41.7378	-108.787	GF5A	20231213	2023-12-13 20:08:54	2023-12-13 20:08:54	WY	MST	2023-12-13 13:08:54	8066	12/13/2023	13:08	1825.9	1677	1638.42	1371.93	0.162647	185.017	4	-1	1
6	GF5A_AHSI_W108.8_N41.7_20230923_004213_L10000054221	Jim Bridger_20230923	Jim Bridger	41.7378	-108.787	GF5A	20230923	2023-09-23 20:11:46	2023-09-23 20:11:46	WY	MST	2023-09-23 13:11:46	8066	09/23/2023	13:11	460.9	452.2	416.674	173.591	0.583389	14.8323	7.1	-1	0
7	GF5A_AHSI_W94.3_N32.3_20230908_003994_L10000051261	Martin Lake_20230908	Martin Lake	32.2597	-94.5703	GF5A	20230908	2023-09-08 19:22:37	2023-09-08 19:22:37	TX	CST	2023-09-08 13:22:37	6146	09/08/2023	13:22	2712.1	2709.3	2459.44	2659.59	0.0813778	374.017	3.48	1	1	有羽流、但周围水汽干扰也很大
8	GF5A_AHSI_W98.5_N29.3_20230814_003630_L10000044804	J K Spruce_20230814	J K Spruce	29.3091	-98.3205	GF5A	20230814	2023-08-14 19:42:15	2023-08-14 19:42:15	TX	CST	2023-08-14 13:42:15	7097	08/14/2023	13:42	1389.2	1408.7	1272.64	1259.84	0.0100611	415.913	1.7	1	1	完美
9	GF5B_AHSI_W100.9_N41.2_20220628_004292_L10000156032	Gerald Gentleman Station_20220628	Gerald Gentleman Station	41.0808	-101.141	GF5B	20220628	2022-06-29 01:41:40	2022-06-28 17:41:40	NE	CST	2022-06-28 11:41:40	6077	06/28/2022	11:41	1314.5	1320.1	1195.97	354.333	0.703727	44.2559	2	1	-3	24波段可见排放，有排放，但是算不准，靠近湖边
10	GF5B_AHSI_W101.1_N41.2_20211220_001524_L10000044164	Gerald Gentleman Station_20211220	Gerald Gentleman Station	41.0808	-101.141	GF5B	20211220	2021-12-21 01:37:21	2021-12-20 17:37:21	NE	CST	2021-12-20 11:37:21	6077	12/20/2021	11:37	1201.3	1283	1135.51	761.187	0.32965	67.0847	4.12	-1	0
11	GF5B_AHSI_W101.6_N47.5_20220619_004161_L10000151101	Antelope Valley_20220619	Antelope Valley	47.371	-101.836	GF5B	20220619	2022-06-20 01:51:31	2022-06-19 17:51:31	ND	CST	2022-06-19 11:51:31	6469	06/19/2022	11:51	522.7	565.6	507.266	771.871	0.521629	93.7638	4.53	1	1
12	GF5B_AHSI_W101.9_N35.3_20220424_003345_L10000118254	Harrington Station_20220424	Harrington Station	35.2972	-101.748	GF5B	20220424	2022-04-25 01:38:35	2022-04-24 17:38:35	TX	CST	2022-04-24 11:38:35	6193	04/24/2022	11:38	296.2	292.8	266.755	138.523	0.480708	13.123	6.66	-1	0
13	GF5B_AHSI_W102.0_N47.5_20220316_002777_L10000118963	Antelope Valley_20220316	Antelope Valley	47.371	-101.836	GF5B	20220316	2022-03-17 01:50:55	2022-03-16 17:50:55	ND	CST	2022-03-16 11:50:55	6469	03/16/2022	11:50	560.6	524.1	480.974	502.304	0.0443466	26.0018	9.18	-1	0
14	GF5B_AHSI_W102.1_N47.5_20220626_004263_L10000154923	Antelope Valley_20220626	Antelope Valley	47.371	-101.836	GF5B	20220626	2022-06-27 01:53:27	2022-06-26 17:53:27	ND	CST	2022-06-26 11:53:27	6469	06/26/2022	11:53	667	827.8	733.949	605.428	0.175109	54.7937	6.59	1	0	能看见一点
15	GF5B_AHSI_W107.5_N40.2_20230926_010921_L10000396892	Craig_20230926	Craig	40.4627	-107.591	GF5B	20230926	2023-09-27 02:12:39	2023-09-26 18:12:39	CO	MST	2023-09-26 11:12:39	6021	09/26/2023	11:12	761.2	909.1	717.384	661.154	0.0783813	310.938	1.1	-1	1
16	GF5B_AHSI_W107.8_N40.7_20221018_005924_L10000222668	Craig_20221018	Craig	40.4627	-107.591	GF5B	20221018	2022-10-19 02:11:02	2022-10-18 18:11:02	CO	MST	2022-10-18 11:11:02	6021	10/18/2022	11:11	830.6	831.6	753.674	782.13	0.0377568	276.721	1.63	1	1	两个源
17	GF5B_AHSI_W108.2_N36.7_20220610_004030_L10000145798	Four Corners Steam Elec Station_20220610	Four Corners Steam Elec Station	36.69	-108.481	GF5B	20220610	2022-06-11 02:06:07	2022-06-10 18:06:07	NM	MST	2022-06-10 11:06:07	2442	06/10/2022	11:06	1471.5	1052.86	1296.94	1068.7	0.175988	175.638	2.97	1	1	完美
18	GF5B_AHSI_W108.3_N36.7_20220420_003287_L10000117219	Four Corners Steam Elec Station_20220420	Four Corners Steam Elec Station	36.69	-108.481	GF5B	20220420	2022-04-21 02:05:10	2022-04-20 18:05:10	NM	MST	2022-04-20 11:05:10	2442	04/20/2022	11:05	539.3	621.1	495.429	306.55	0.381242	68.2681	2.3	-1	1	有排放
19	GF5B_AHSI_W108.3_N36.7_20240106_012407_L10000448627	Four Corners Steam Elec Station_20240106	Four Corners Steam Elec Station	36.69	-108.481	GF5B	20240106	2024-01-07 02:12:33	2024-01-06 18:12:33	NM	MST	2024-01-06 11:12:33	2442	01/06/2024	11:12	1357.4	1191	1201.22	701.524	0.415991	111.436	1.32	1	0	无排放，噪声很大
20	GF5B_AHSI_W108.8_N41.7_20220212_002311_L10000077220	Jim Bridger_20220212	Jim Bridger	41.7378	-108.787	GF5B	20220212	2022-02-13 02:10:06	2022-02-12 18:10:06	WY	MST	2022-02-12 11:10:06	8066	02/12/2022	11:10	580.1	545	520.951	470.717	0.096427	57.1692	4.49	-1	1	有排放，但周围噪声明显更大，不适合反演
21	GF5B_AHSI_W109.0_N41.6_20231031_011431_L10000413197	Jim Bridger_20231031	Jim Bridger	41.7378	-108.787	GF5B	20231031	2023-11-01 02:20:04	2023-10-31 18:20:04	WY	MST	2023-10-31 11:20:04	8066	10/31/2023	11:20	1208.8	1174.8	1086.32	993.15	0.0857695	94.3495	6.01	-1	1
22	GF5B_AHSI_W109.1_N41.6_20231221_012174_L10000440228	Jim Bridger_20231221	Jim Bridger	41.7378	-108.787	GF5B	20231221	2023-12-22 02:20:37	2023-12-21 18:20:37	WY	MST	2023-12-21 11:20:37	8066	12/21/2023	11:20	994.7	868	864.063	813.205	0.0588597	137.535	3.18	-1	1
23	GF5B_AHSI_W110.9_N39.2_20220418_003258_L10000114473	Hunter_20220418	Hunter	39.1747	-111.029	GF5B	20220418	2022-04-19 02:17:59	2022-04-18 18:17:59	UT	MST	2022-04-18 11:17:59	6165	04/18/2022	11:17	909.6	899.7	822.631	660.681	0.196868	60.2758	3.45	1	-10	低风速
24	GF5B_AHSI_W110.9_N39.2_20240104_012378_L10000447404	Hunter_20240104	Hunter	39.1747	-111.029	GF5B	20240104	2024-01-05 02:25:25	2024-01-04 18:25:25	UT	MST	2024-01-04 11:25:25	6165	01/04/2024	11:25	353.2	352.6	320.191	171.902	0.463128	27.7846	0.6	-1	-2
25	GF5B_AHSI_W80.4_N39.2_20231012_011153_L10000404427	Harrison Power Station_20231012	Harrison Power Station	39.3844	-80.3325	GF5B	20231012	2023-10-13 00:23:33	2023-10-12 16:23:33	WV	EST	2023-10-12 11:23:33	3944	10/12/2023	11:23	229.9	228.3	208.005	226.9	0.0908365	38.6027	0.73	1	-2	伪排放
26	GF5B_AHSI_W85.2_N38.7_20231031_011430_L10000413176	Trimble County_20231031	Trimble County	38.5847	-85.4117	GF5B	20231031	2023-11-01 00:42:01	2023-10-31 16:42:01	KY	EST	2023-10-31 11:42:01	6071	10/31/2023	11:42	278.2	284.99	256.691	1700.32	5.62401	154.685	3.4	1	-10
27	GF5B_AHSI_W85.3_N38.7_20230714_009842_L10000360353	Trimble County_20230714	Trimble County	38.5847	-85.4117	GF5B	20230714	2023-07-15 00:42:09	2023-07-14 16:42:09	KY	EST	2023-07-14 11:42:09	6071	07/14/2023	11:42	1373.5	1399.05	1262.24	1473.32	0.167221	584.505	1.52	1	1
28	GF5B_AHSI_W88.6_N37.1_20231212_012042_L10000435322	Shawnee_20231212	Shawnee	37.1517	-88.775	GF5B	20231212	2023-12-13 00:54:21	2023-12-12 16:54:21	KY	CST	2023-12-12 10:54:21	1379	12/12/2023	10:54	943.299	928	843.255	558.936	0.337169	83.1586	1.77	1	0	羽流飘到了水面上，水汽干扰大
29	GF5B_AHSI_W88.6_N37.2_20220326_002922_L10000100107	Shawnee_20220326	Shawnee	37.1517	-88.775	GF5B	20220326	2022-03-27 00:46:28	2022-03-26 16:46:28	KY	CST	2022-03-26 10:46:28	1379	03/26/2022	10:46	811.401	780.998	714.945	1996.54	1.79258	137.992	5.61	-1	0	羽流飘到了水面上，水汽干扰大
30	GF5B_AHSI_W88.7_N37.2_20230825_010454_L10000380643	Shawnee_20230825	Shawnee	37.1517	-88.775	GF5B	20230825	2023-08-26 00:54:41	2023-08-25 16:54:41	KY	CST	2023-08-25 10:54:41	1379	08/25/2023	10:54	1266.6	1261.2	1144.63	1068.2	0.0667787	211.857	2.61	1	1	有排放，圆形，无羽流形状
31	GF5B_AHSI_W92.2_N34.3_20231006_011066_L10000401605	White Bluff_20231006	White Bluff	34.4236	-92.1392	GF5B	20231006	2023-10-07 01:05:59	2023-10-06 17:05:59	AR	CST	2023-10-06 11:05:59	6009	10/06/2023	11:05	320	380.1	294.843	833.286	1.82621	99.3638	2.8	1	0
32	GF5B_AHSI_W94.2_N45.6_20220602_003913_L10000141558	Sherburne County_20220602	Sherburne County	45.3792	-93.8958	GF5B	20220602	2022-06-03 01:19:01	2022-06-02 17:19:01	MN	CST	2022-06-02 11:19:01	6090	06/02/2022	11:19	411.9	411.2	373.468	729.758	0.954003	56.7051	4.82	1	0
33	GF5B_AHSI_W94.3_N32.3_20231103_011474_L10000414550	Martin Lake_20231103	Martin Lake	32.2597	-94.5703	GF5B	20231103	2023-11-04 01:12:54	2023-11-03 17:12:54	TX	CST	2023-11-03 11:12:54	6146	11/03/2023	11:12	1488.1	1487.9	1349.95	1131.34	0.161936	254.806	2.34	1	1	有羽流，水面噪声大
34	GF5B_AHSI_W94.4_N32.3_20230906_010629_L10000386730	Martin Lake_20230906	Martin Lake	32.2597	-94.5703	GF5B	20230906	2023-09-07 01:13:22	2023-09-06 17:13:22	TX	CST	2023-09-06 11:13:22	6146	09/06/2023	11:13	2665.3	2675.5	2419.92	1261.44	0.478729	130.486	2.72	-1	-3	只有一点点排放，不构成羽流，算不准，靠近湖边
35	GF5B_AHSI_W94.5_N32.3_20220407_003097_L10000107611	Martin Lake_20220407	Martin Lake	32.2597	-94.5703	GF5B	20220407	2022-04-08 01:05:50	2022-04-07 17:05:50	TX	CST	2022-04-07 11:05:50	6146	04/07/2022	11:05	1469.4	1514	1336.39	838.306	0.372708	65.2735	6.16	-1	0	没有排放很奇怪
36	GF5B_AHSI_W94.5_N38.2_20221019_005938_L10000223276	La Cygne_20221019	La Cygne	38.3472	-94.6467	GF5B	20221019	2022-10-20 01:15:33	2022-10-19 17:15:33	KS	CST	2022-10-19 11:15:33	1241	10/19/2022	11:15	708.8	713.2	644.01	643.163	0.00131617	126.995	2.6	-1	1	32波段可见排放源
37	GF5B_AHSI_W96.5_N31.3_20221019_005938_L10000223290	Oak Grove_20221019	Oak Grove	31.185	-96.4853	GF5B	20221019	2022-10-20 01:17:28	2022-10-19 17:17:28	TX	CST	2022-10-19 11:17:28	6180	10/19/2022	11:17	1788.5	1803.2	1626.28	1754.9	0.0790869	667.963	1.55	-1	1	有排放
38	GF5B_AHSI_W96.9_N29.8_20221019_005938_L10000223293	Sam Seymour_20221019	Sam Seymour	29.9172	-96.7506	GF5B	20221019	2022-10-20 01:17:53	2022-10-19 17:17:53	TX	CST	2022-10-19 11:17:53	6179	10/19/2022	11:17	964.3	979	878.577	1006.21	0.145273	191.109	2.61	-1	1
39	ZY1E_AHSI_W101.24_N41.04_20230805_020428_L1A0000637084	Gerald Gentleman Station_20230805	Gerald Gentleman Station	41.0808	-101.141	ZY1E	20230805	2023-08-05 17:48:20	2023-08-05 17:48:20	NE	CST	2023-08-05 11:48:20	6077	08/05/2023	11:48	1358.5	1357.1	1231.39	777.056	0.368962	82.6816	6.02	-1	1
40	ZY1E_AHSI_W101.46_N35.28_20220305_012995_L1A0000414997	Harrington Station_20220305	Harrington Station	35.2972	-101.748	ZY1E	20220305	2022-03-05 17:52:24	2022-03-05 17:52:24	TX	CST	2022-03-05 11:52:24	6193	03/05/2022	11:52	167.2	177.3	159.622	123.741	0.224786	11.7192	10.76	1	0	排放强度太低了，无法检测到
41	ZY1E_AHSI_W101.95_N35.28_20220331_013368_L1A0000427095	Harrington Station_20220331	Harrington Station	35.2972	-101.748	ZY1E	20220331	2022-03-31 17:54:08	2022-03-31 17:54:08	TX	CST	2022-03-31 11:54:08	6193	03/31/2022	11:54	641.9	638.7	579.709	610.772	0.0535839	61.261	5.28	1	1
42	ZY1E_AHSI_W101.95_N47.64_20201123_006296_L1A0000193277	Antelope Valley_20201123	Antelope Valley	47.371	-101.836	ZY1E	20201123	2020-11-23 18:05:58	2020-11-23 18:05:58	ND	CST	2020-11-23 12:05:58	6469	11/23/2020	12:05	372.7	365.9	337.594	128.295	0.619973	28.7928	6.44	-1	0	这一景还是不太好反演
43	ZY1E_AHSI_W104.76_N41.92_20230917_021045_L1A0000655064	Laramie River_20230917	Laramie River	42.1103	-104.883	ZY1E	20230917	2023-09-17 18:02:08	2023-09-17 18:02:08	WY	MST	2023-09-17 11:02:08	6204	09/17/2023	11:02	1667.1	1881.6	1518.85	1375.47	0.0944029	113.884	7.79	-1	1	羽流良好
44	ZY1E_AHSI_W104.93_N41.92_20230625_019840_L1A0000620580	Laramie River_20230625	Laramie River	42.1103	-104.883	ZY1E	20230625	2023-06-25 18:05:08	2023-06-25 18:05:08	WY	MST	2023-06-25 11:05:08	6204	06/25/2023	11:05	1043.4	1114.7	951.947	1081.42	0.136009	217.068	2.52	1	1	有排放
45	ZY1E_AHSI_W105.13_N42.36_20200825_005004_L1A0000136593	Laramie River_20200825	Laramie River	42.1103	-104.883	ZY1E	20200825	2020-08-25 18:10:51	2020-08-25 18:10:51	WY	MST	2020-08-25 11:10:51	6204	08/25/2020	11:10	520.3	520.5	472.038	562.202	0.19101	89.2928	3.13	1	1
46	ZY1E_AHSI_W107.47_N40.60_20231007_021332_L1A0000663395	Craig_20231007	Craig	40.4627	-107.591	ZY1E	20231007	2023-10-07 18:11:00	2023-10-07 18:11:00	CO	MST	2023-10-07 11:11:00	6021	10/07/2023	11:11	487.2	518.1	447.12	451.27	0.00928282	186.322	1.36	-1	1	有排放 不像羽流
47	ZY1E_AHSI_W107.63_N40.60_20230715_020127_L1A0000628485	Craig_20230715	Craig	40.4627	-107.591	ZY1E	20230715	2023-07-15 18:14:00	2023-07-15 18:14:00	CO	MST	2023-07-15 11:14:00	6021	07/15/2023	11:14	892.4	903.4	811.9	780.779	0.0383313	138.633	2.81	-1	1	19波段较好
48	ZY1E_AHSI_W108.64_N36.61_20200917_005334_L1A0000154763	Four Corners Steam Elec Station_20200917	Four Corners Steam Elec Station	36.69	-108.481	ZY1E	20200917	2020-09-17 18:19:28	2020-09-17 18:19:28	NM	MST	2020-09-17 11:19:28	2442	09/17/2020	11:19	1507.6	1506	1367.21	882.042	0.354861	160.128	2.71	-1	1	羽流形状好
49	ZY1E_AHSI_W108.68_N41.92_20200911_005248_L1A0000148906	Jim Bridger_20200911	Jim Bridger	41.7378	-108.787	ZY1E	20200911	2020-09-11 18:24:53	2020-09-11 18:24:53	WY	MST	2020-09-11 11:24:53	8066	09/11/2020	11:24	1437.4	1314.4	1259.35	1240.1	0.0152922	104.404	7.11	-1	1	排放位置在山上，不像排放源
50	ZY1E_AHSI_W108.72_N36.61_20231007_021332_L1A0000663404	Four Corners Steam Elec Station_20231007	Four Corners Steam Elec Station	36.69	-108.481	ZY1E	20231007	2023-10-07 18:12:07	2023-10-07 18:12:07	NM	MST	2023-10-07 11:12:07	2442	10/07/2023	11:12	1532.3	1509.9	1386.01	939.227	0.322355	309.627	1.7	-1	1	羽流很完整，可以作为案例
51	ZY1E_AHSI_W108.78_N41.92_20200813_004832_L1A0000126505	Jim Bridger_20200813	Jim Bridger	41.7378	-108.787	ZY1E	20200813	2020-08-13 18:24:46	2020-08-13 18:24:46	WY	MST	2020-08-13 11:24:46	8066	08/13/2020	11:24	1902.1	1640.8	1630.74	941.409	0.42271	92.0034	5.41	1	1	羽流形状很好，不过怎么风速有点问题
52	ZY1E_AHSI_W111.21_N39.27_20201004_005578_L1A0000168618	Hunter_20201004	Hunter	39.1747	-111.029	ZY1E	20201004	2020-10-04 18:32:36	2020-10-04 18:32:36	UT	MST	2020-10-04 11:32:36	6165	10/04/2020	11:32	656	681.6	607.499	663.275	0.0918119	162.562	2.13	1	1	完美
53	ZY1E_AHSI_W111.31_N39.27_20200905_005163_L1A0000144224	Hunter_20200905	Hunter	39.1747	-111.029	ZY1E	20200905	2020-09-05 18:32:32	2020-09-05 18:32:32	UT	MST	2020-09-05 11:32:32	6165	09/05/2020	11:32	1057.9	1295.6	1074.72	488.645	0.545327	138.435	1.91	1	1	有羽流
54	ZY1E_AHSI_W80.32_N39.27_20220828_015517_L1A0000495655	Harrison Power Station_20220828	Harrison Power Station	39.3844	-80.3325	ZY1E	20220828	2022-08-28 16:29:54	2022-08-28 16:29:54	WV	EST	2022-08-28 11:29:54	3944	08/28/2022	11:29	2026.3	2030.1	1839.89	242.127	0.868402	34.2115	2.02	1	0	第2种波段选取未反演到排放
55	ZY1E_AHSI_W85.49_N38.38_20220327_013308_L1A0000425150	Trimble County_20220327	Trimble County	38.5847	-85.4117	ZY1E	20220327	2022-03-27 16:51:14	2022-03-27 16:51:14	KY	EST	2022-03-27 11:51:14	6071	03/27/2022	11:51	412.9	409.2	371.723	338.524	0.0893131	54.8976	3.62	1	1
56	ZY1E_AHSI_W86.17_N36.17_20220327_013308_L1A0000425155	Gallatin_20220327	Gallatin	36.3156	-86.4006	ZY1E	20220327	2022-03-27 16:51:51	2022-03-27 16:51:51	TN	CST	2022-03-27 10:51:51	3403	03/27/2022	10:51	307	306.4	278.043	179.484	0.354473	29.1312	2.48	1	0
57	ZY1E_AHSI_W86.59_N36.17_20221004_016048_L1A0000511602	Gallatin_20221004	Gallatin	36.3156	-86.4006	ZY1E	20221004	2022-10-04 16:51:33	2022-10-04 16:51:33	TN	CST	2022-10-04 10:51:33	3403	10/04/2022	10:51	758.6	764.3	692.586	938.256	0.354714	146.429	1.48	-1	-2	像伪排放源
58	ZY1E_AHSI_W88.57_N37.06_20211102_011228_L1A0000359594	Shawnee_20211102	Shawnee	37.1517	-88.775	ZY1E	20211102	2021-11-02 17:02:50	2021-11-02 17:02:50	KY	CST	2021-11-02 11:02:50	1379	11/02/2021	11:02	430.399	432.9	390.527	799.028	1.04603	90.9656	3.01	1	0	伪排放
59	ZY1E_AHSI_W88.87_N37.06_20211128_011601_L1A0000371189	Shawnee_20211128	Shawnee	37.1517	-88.775	ZY1E	20211128	2021-11-28 17:03:59	2021-11-28 17:03:59	KY	CST	2021-11-28 11:03:59	1379	11/28/2021	11:03	406.4	406.4	368.68	290.996	0.210709	57.1013	3.51	1	1	有排放
60	ZY1E_AHSI_W88.95_N37.06_20210119_007111_L1A0000229838	Shawnee_20210119	Shawnee	37.1517	-88.775	ZY1E	20210119	2021-01-19 17:02:53	2021-01-19 17:02:53	KY	CST	2021-01-19 11:02:53	1379	01/19/2021	11:02	868.501	669.401	781.87	715.537	0.084839	274.91	1.57	1	1	右下角伪排放源
61	ZY1E_AHSI_W89.08_N37.06_20201221_006696_L1A0000212411	Shawnee_20201221	Shawnee	37.1517	-88.775	ZY1E	20201221	2020-12-21 17:03:04	2020-12-21 17:03:04	KY	CST	2020-12-21 11:03:04	1379	12/21/2020	11:03	386.9	386.599	350.976	333.352	0.0502153	49.1047	6.44	-1	0	无排放
62	ZY1E_AHSI_W90.79_N38.83_20210925_010683_L1A0000340283	Labadie_20210925	Labadie	38.5583	-90.8361	ZY1E	20210925	2021-09-25 17:13:23	2021-09-25 17:13:23	MO	CST	2021-09-25 11:13:23	2103	09/25/2021	11:13	1746.6	1732.6	1581.74	510.643	0.677163	62.5682	2.94	1	0	无排放
63	ZY1E_AHSI_W90.90_N38.38_20220113_012261_L1A0000391512	Labadie_20220113	Labadie	38.5583	-90.8361	ZY1E	20220113	2022-01-13 17:13:19	2022-01-13 17:13:19	MO	CST	2022-01-13 11:13:19	2103	01/13/2022	11:13	1841.4	1849.6	1672.1	435.157	0.739754	72.9442	1.73	1	0	无排放
64	ZY1E_AHSI_W90.98_N38.38_20230329_018573_L1A0000585856	Labadie_20230329	Labadie	38.5583	-90.8361	ZY1E	20230329	2023-03-29 17:07:56	2023-03-29 17:07:56	MO	CST	2023-03-29 11:07:56	2103	03/29/2023	11:07	2464.5	2453.2	2234.56	1526.38	0.31692	222.631	1.58	1	-3	羽流沿着江面规整陈列，飘到江面上无法反演
65	ZY1E_AHSI_W91.94_N34.40_20220726_015044_L1A0000481359	White Bluff_20220726	White Bluff	34.4236	-92.1392	ZY1E	20220726	2022-07-26 17:12:13	2022-07-26 17:12:13	AR	CST	2022-07-26 11:12:13	6009	07/26/2022	11:12	1389.4	1742.2	1324.45	1342.85	0.0138919	119.211	3.47	-1	1	微弱的排放
66	ZY1E_AHSI_W92.11_N34.40_20220113_012261_L1A0000391521	White Bluff_20220113	White Bluff	34.4236	-92.1392	ZY1E	20220113	2022-01-13 17:14:27	2022-01-13 17:14:27	AR	CST	2022-01-13 11:14:27	6009	01/13/2022	11:14	901.3	897.1	816.757	311.622	0.618464	55.0692	2.28	1	0	没有排放
67	ZY1E_AHSI_W92.15_N34.40_20220309_013050_L1A0000416988	White Bluff_20220309	White Bluff	34.4236	-92.1392	ZY1E	20220309	2022-03-09 17:14:19	2022-03-09 17:14:19	AR	CST	2022-03-09 11:14:19	6009	03/09/2022	11:14	280.3	279.1	254.03	766.215	2.01624	77.203	2.88	1	-10	很多云，不适合反演
68	ZY1E_AHSI_W92.33_N34.40_20231104_021729_L1A0000674441	White Bluff_20231104	White Bluff	34.4236	-92.1392	ZY1E	20231104	2023-11-04 17:03:42	2023-11-04 17:03:42	AR	CST	2023-11-04 11:03:42	6009	11/04/2023	11:03	537.3	433.2	482.708	410.173	0.150267	66.7609	0.86	-1	1
69	ZY1E_AHSI_W93.56_N45.45_20220320_013210_L1A0000421897	Sherburne County_20220320	Sherburne County	45.3792	-93.8958	ZY1E	20220320	2022-03-20 17:31:14	2022-03-20 17:31:14	MN	CST	2022-03-20 11:31:14	6090	03/20/2022	11:31	1451.2	1311.2	1250.89	471.287	0.623238	71.5856	1.91	-1	0	几乎看不到反演结果，有排放，但只有一点点
70	ZY1E_AHSI_W94.02_N45.45_20220927_015948_L1A0000508557	Sherburne County_20220927	Sherburne County	45.3792	-93.8958	ZY1E	20220927	2022-09-27 17:31:08	2022-09-27 17:31:08	MN	CST	2022-09-27 11:31:08	6090	09/27/2022	11:31	1052.9	1052.9	955.175	1517.52	0.588731	245.74	3.34	1	1	有羽流
71	ZY1E_AHSI_W94.33_N38.38_20211206_011716_L1A0000374910	La Cygne_20211206	La Cygne	38.3472	-94.6467	ZY1E	20211206	2021-12-06 17:27:03	2021-12-06 17:27:03	KS	CST	2021-12-06 11:27:03	1241	12/06/2021	11:27	365.5	442.9	363.173	521.342	0.435519	56.1498	4.78	-1	0
72	ZY1E_AHSI_W94.40_N32.17_20210401_008144_L1A0000261751	Martin Lake_20210401	Martin Lake	32.2597	-94.5703	ZY1E	20210401	2021-04-01 17:20:59	2021-04-01 17:20:59	TX	CST	2021-04-01 11:20:59	6146	04/01/2021	11:20	1201.3	1170.4	1080.46	1106.08	0.0237157	186.817	3.06	-1	1	有羽流
73	ZY1E_AHSI_W94.44_N38.38_20210913_010511_L1A0000334632	La Cygne_20210913	La Cygne	38.3472	-94.6467	ZY1E	20210913	2021-09-13 17:27:32	2021-09-13 17:27:32	KS	CST	2021-09-13 11:27:32	1241	09/13/2021	11:27	662.6	671	604.53	729.239	0.206291	75.7368	5.41	-1	0	反演不出来
74	ZY1E_AHSI_W94.49_N38.38_20200711_004357_L1A0000107667	La Cygne_20200711	La Cygne	38.3472	-94.6467	ZY1E	20200711	2020-07-11 17:23:19	2020-07-11 17:23:19	KS	CST	2020-07-11 11:23:19	1241	07/11/2020	11:23	1601.4	1598	1451.58	2518.89	0.735268	251.747	2.72	1	-2	反演效果不好，只有一团排放；感觉有点像是把水汽也核算进去了，偏高很多；误差太大了
75	ZY1E_AHSI_W94.59_N32.17_20220303_012967_L1A0000414108	Martin Lake_20220303	Martin Lake	32.2597	-94.5703	ZY1E	20220303	2022-03-03 17:22:15	2022-03-03 17:22:15	TX	CST	2022-03-03 11:22:15	6146	03/03/2022	11:22	1866.9	1838.5	1684.18	520.406	0.691002	77.037	0.58	-1	-2	这一景本应该能够看到完美羽流的，但是羽流的方向刚好经过了湖面，导致出现一段非常大的异常高值
76	ZY1E_AHSI_W94.77_N32.17_20210104_006896_L1A0000221658	Martin Lake_20210104	Martin Lake	32.2597	-94.5703	ZY1E	20210104	2021-01-04 17:21:40	2021-01-04 17:21:40	TX	CST	2021-01-04 11:21:40	6146	01/04/2021	11:21	1286	1418.3	1208.65	673.895	0.442438	95.5425	1.96	-1	0	水汽干扰大，几乎无反演结果
77	ZY1E_AHSI_W96.19_N31.29_20220130_012507_L1A0000399543	Oak Grove_20220130	Oak Grove	31.185	-96.4853	ZY1E	20220130	2022-01-30 17:28:05	2022-01-30 17:28:05	TX	CST	2022-01-30 11:28:05	6180	01/30/2022	11:28	1396	1398.9	1267.66	1161.99	0.0833565	137.244	4.62	1	1
78	ZY1E_AHSI_W96.23_N31.29_20220326_013296_L1A0000424559	Oak Grove_20220326	Oak Grove	31.185	-96.4853	ZY1E	20220326	2022-03-26 17:27:55	2022-03-26 17:27:55	TX	CST	2022-03-26 11:27:55	6180	03/26/2022	11:27	767.3	835.6	723.965	713.375	0.0146283	113.146	3.3	1	1
79	ZY1E_AHSI_W96.26_N31.29_20201006_005607_L1A0000169633	Oak Grove_20201006	Oak Grove	31.185	-96.4853	ZY1E	20201006	2020-10-06 17:25:38	2020-10-06 17:25:38	TX	CST	2020-10-06 11:25:38	6180	10/06/2020	11:25	1874.4	1879.2	1702.24	1531.09	0.100542	429.02	1.93	-1	1	有排放，无羽流
80	ZY1E_AHSI_W96.28_N31.29_20210424_008474_L1A0000271419	Oak Grove_20210424	Oak Grove	31.185	-96.4853	ZY1E	20210424	2021-04-24 17:27:56	2021-04-24 17:27:56	TX	CST	2021-04-24 11:27:56	6180	04/24/2021	11:27	893.6	900.9	813.64	888.504	0.0920108	94.1493	5.95	1	1	偏高
81	ZY1E_AHSI_W96.41_N31.29_20211206_011716_L1A0000374926	Oak Grove_20211206	Oak Grove	31.185	-96.4853	ZY1E	20211206	2021-12-06 17:29:06	2021-12-06 17:29:06	TX	CST	2021-12-06 11:29:06	6180	12/06/2021	11:29	1798.7	1790.1	1627.98	1650.78	0.0140063	150.755	7.76	1	1	有一点点羽流
82	ZY1E_AHSI_W96.55_N29.95_20220130_012507_L1A0000399546	Sam Seymour_20220130	Sam Seymour	29.9172	-96.7506	ZY1E	20220130	2022-01-30 17:28:28	2022-01-30 17:28:28	TX	CST	2022-01-30 11:28:28	6179	01/30/2022	11:28	1394.8	1390.4	1263.48	812.825	0.356677	148.301	2.83	-1	1
83	ZY1E_AHSI_W96.58_N31.29_20200711_004359_L1A0000107694	Oak Grove_20200711	Oak Grove	31.185	-96.4853	ZY1E	20200711	2020-07-11 17:25:19	2020-07-11 17:25:19	TX	CST	2020-07-11 11:25:19	6180	07/11/2020	11:25	1869.6	1875.6	1698.34	1969.32	0.159554	300.153	3.26	-1	1	羽流可以
84	ZY1E_AHSI_W96.59_N29.95_20220326_013296_L1A0000424562	Sam Seymour_20220326	Sam Seymour	29.9172	-96.7506	ZY1E	20220326	2022-03-26 17:28:17	2022-03-26 17:28:17	TX	CST	2022-03-26 11:28:17	6179	03/26/2022	11:28	1765.4	1773.9	1605.14	1222.64	0.2383	101.816	3.98	-1	-3	能看到排放，但羽流飘到了湖面上
85	ZY1E_AHSI_W96.65_N29.95_20210424_008474_L1A0000271422	Sam Seymour_20210424	Sam Seymour	29.9172	-96.7506	ZY1E	20210424	2021-04-24 17:28:19	2021-04-24 17:28:19	TX	CST	2021-04-24 11:28:19	6179	04/24/2021	11:28	1037.5	1164.7	995.055	1060.41	0.0656808	101.999	6.15	-1	1
86	ZY1E_AHSI_W96.74_N31.10_20200612_003941_L1A0000093912	Oak Grove_20200612	Oak Grove	31.185	-96.4853	ZY1E	20200612	2020-06-12 17:25:12	2020-06-12 17:25:12	TX	CST	2020-06-12 11:25:12	6180	06/12/2020	11:25	1759.1	1762.5	1597.11	2295.8	0.437468	290.364	4	1	1	排放羽流很清晰
87	ZY1E_AHSI_W96.95_N29.95_20200711_004359_L1A0000107697	Sam Seymour_20200711	Sam Seymour	29.9172	-96.7506	ZY1E	20200711	2020-07-11 17:25:42	2020-07-11 17:25:42	TX	CST	2020-07-11 11:25:42	6179	07/11/2020	11:25	1793.1	1824.9	1638.69	1225.17	0.252348	215.553	2.82	1	1	有羽流，还不错，飘到水面上了，前16波段清晰；作为强吸收和弱吸收的案例
88	ZY1E_AHSI_W97.05_N29.95_20200612_003941_L1A0000093915	Sam Seymour_20200612	Sam Seymour	29.9172	-96.7506	ZY1E	20200612	2020-06-12 17:25:31	2020-06-12 17:25:31	TX	CST	2020-06-12 11:25:31	6179	06/12/2020	11:25	1467.5	1562.8	1367.32	1639.83	0.199305	223.096	3.64	1	1	羽流形状很好，可以作为案例
89	ZY1E_AHSI_W98.07_N29.51_20220930_015991_L1A0000509878	J K Spruce_20220930	J K Spruce	29.3091	-98.3205	ZY1E	20220930	2022-09-30 17:31:53	2022-09-30 17:31:53	TX	CST	2022-09-30 11:31:53	7097	09/30/2022	11:31	1501.1	1499.5	1361.03	1370	0.00659524	494.126	1.61	-1	1	有噪声，有羽流
90	ZY1E_AHSI_W98.20_N29.06_20220418_013626_L1A0000435959	J K Spruce_20220418	J K Spruce	29.3091	-98.3205	ZY1E	20220418	2022-04-18 17:33:49	2022-04-18 17:33:49	TX	CST	2022-04-18 11:33:49	7097	04/18/2022	11:33	629.1	628.9	570.61	694.915	0.217845	68.468	6.44	1	1
91	ZY1E_AHSI_W98.50_N29.51_20200930_005521_L1A0000170469	J K Spruce_20200930	J K Spruce	29.3091	-98.3205	ZY1E	20200930	2020-09-30 17:33:03	2020-09-30 17:33:03	TX	CST	2020-09-30 11:33:03	7097	09/30/2020	11:33	914.9	958.2	851.588	1197.91	0.406673	190.039	3.18	1	1
92	ZY1E_AHSI_W98.51_N29.06_20201029_005935_L1A0000194928	J K Spruce_20201029	J K Spruce	29.3091	-98.3205	ZY1E	20201029	2020-10-29 17:33:12	2020-10-29 17:33:12	TX	CST	2020-10-29 11:33:12	7097	10/29/2020	11:33	508.1	564.9	489.281	476.513	0.0260946	50.5539	7.17	1	1	有团块排放
93	ZY1E_AHSI_W98.53_N29.51_20220514_013997_L1A0000447750	J K Spruce_20220514	J K Spruce	29.3091	-98.3205	ZY1E	20220514	2022-05-14 17:35:16	2022-05-14 17:35:16	TX	CST	2022-05-14 11:35:16	7097	05/14/2022	11:35	1041	1035.2	941.31	1389.15	0.47576	339.266	2.12	1	1
94	ZY1F_AHSI_W101.04_N41.04_20230916_009032_L1A0000537816	Gerald Gentleman Station_20230916	Gerald Gentleman Station	41.0808	-101.141	ZY1F	20230916	2023-09-16 18:00:26	2023-09-16 18:00:26	NE	CST	2023-09-16 12:00:26	6077	09/16/2023	12:00	1330.8	1109.2	1207.28	812.021	0.327397	107.478	3.96	1	1
95	ZY1F_AHSI_W101.05_N41.04_20231110_009821_L1A0000582861	Gerald Gentleman Station_20231110	Gerald Gentleman Station	41.0808	-101.141	ZY1F	20231110	2023-11-10 18:01:07	2023-11-10 18:01:07	NE	CST	2023-11-10 12:01:07	6077	11/10/2023	12:01	1304.1	1307.4	1183.11	797.5	0.325928	87.0602	4.88	1	1
96	ZY1F_AHSI_W101.48_N41.04_20230624_007827_L1A0000469131	Gerald Gentleman Station_20230624	Gerald Gentleman Station	41.0808	-101.141	ZY1F	20230624	2023-06-24 18:00:53	2023-06-24 18:00:53	NE	CST	2023-06-24 12:00:53	6077	06/24/2023	12:00	688	687.2	624.143	581.185	0.0688275	48.7016	7.6	1	1	10波段效果好
97	ZY1F_AHSI_W104.83_N41.92_20230930_009233_L1A0000549577	Laramie River_20230930	Laramie River	42.1103	-104.883	ZY1F	20230930	2023-09-30 18:16:43	2023-09-30 18:16:43	WY	MST	2023-09-30 11:16:43	6204	09/30/2023	11:16	798.9	661.1	691.414	699.086	0.0110958	104.046	3.4	-1	1	有羽流
98	ZY1F_AHSI_W107.55_N40.59_20231020_009525_L1A0000564874	Craig_20231020	Craig	40.4627	-107.591	ZY1F	20231020	2023-10-20 18:26:24	2023-10-20 18:26:24	CO	MST	2023-10-20 11:26:24	6021	10/20/2023	11:26	729.3	742.5	666.799	80.9264	0.878634	12.5454	0.42	-1	-2	22有一个羽流 24双羽流0.001
99	ZY1F_AHSI_W110.71_N39.27_20230817_008602_L1A0000512937	Hunter_20230817	Hunter	39.1747	-111.029	ZY1F	20230817	2023-08-17 18:36:51	2023-08-17 18:36:51	UT	MST	2023-08-17 11:36:51	6165	08/17/2023	11:36	654	651.7	592.047	571.547	0.0346262	144.491	2.06	1	1
100	ZY1F_AHSI_W110.73_N39.27_20230623_007813_L1A0000468861	Hunter_20230623	Hunter	39.1747	-111.029	ZY1F	20230623	2023-06-23 18:36:03	2023-06-23 18:36:03	UT	MST	2023-06-23 11:36:03	6165	06/23/2023	11:36	422.6	419.8	381.852	487.887	0.277687	35.8547	6.19	-1	0	有点不像
101	ZY1F_AHSI_W111.15_N39.27_20230719_008186_L1A0000490264	Hunter_20230719	Hunter	39.1747	-111.029	ZY1F	20230719	2023-07-19 18:38:10	2023-07-19 18:38:10	UT	MST	2023-07-19 11:38:10	6165	07/19/2023	11:38	656.412	749.552	649.001	132.057	0.796523	19.4658	0.5	1	-2	清晰完美
102	ZY1F_AHSI_W80.08_N39.27_20220621_002553_L1A0000190867	Harrison Power Station_20220621	Harrison Power Station	39.3844	-80.3325	ZY1F	20220621	2022-06-21 16:24:44	2022-06-21 16:24:44	WV	EST	2022-06-21 11:24:44	3944	06/21/2022	11:24	1900.6	2008.4	1763.31	1597.75	0.0938923	347.53	2.33	1	1	非常清晰
103	ZY1F_AHSI_W80.61_N39.27_20230418_006865_L1A0000414746	Harrison Power Station_20230418	Harrison Power Station	39.3844	-80.3325	ZY1F	20230418	2023-04-18 16:34:27	2023-04-18 16:34:27	WV	EST	2023-04-18 11:34:27	3944	04/18/2023	11:34	631.6	618	565.987	593.56	0.0487174	59.75	5.73	-1	1
104	ZY1F_AHSI_W86.57_N36.17_20230305_006234_L1A0000379047	Gallatin_20230305	Gallatin	36.3156	-86.4006	ZY1F	20230305	2023-03-05 16:54:32	2023-03-05 16:54:32	TN	CST	2023-03-05 10:54:32	3403	03/05/2023	10:54	278.3	276	250.592	295.312	0.178458	39.7348	2.2	-1	0	无排放
105	ZY1F_AHSI_W88.63_N37.05_20231031_009677_L1A0000574307	Shawnee_20231031	Shawnee	37.1517	-88.775	ZY1F	20231031	2023-10-31 17:07:20	2023-10-31 17:07:20	KY	CST	2023-10-31 11:07:20	1379	10/31/2023	11:07	879.1	888.799	798.533	624.525	0.217909	60.401	3.57	-1	0	羽流飘到了水面上，水汽干扰大
106	ZY1F_AHSI_W90.79_N38.83_20230704_007970_L1A0000476992	Labadie_20230704	Labadie	38.5583	-90.8361	ZY1F	20230704	2023-07-04 17:16:01	2023-07-04 17:16:01	MO	CST	2023-07-04 11:16:01	2103	07/04/2023	11:16	2560.7	2558.1	2322.4	2258.13	0.0276719	467.364	2.41	-1	1	构成羽流，有排放
107	ZY1F_AHSI_W90.93_N38.38_20231022_009549_L1A0000565683	Labadie_20231022	Labadie	38.5583	-90.8361	ZY1F	20231022	2023-10-22 17:17:43	2023-10-22 17:17:43	MO	CST	2023-10-22 11:17:43	2103	10/22/2023	11:17	2197.7	2194	1992.77	322.286	0.838272	53.6309	1.63	1	0	受江水影响较大
108	ZY1F_AHSI_W93.93_N45.45_20220721_002978_L1A0000173921	Sherburne County_20220721	Sherburne County	45.3792	-93.8958	ZY1F	20220721	2022-07-21 17:27:56	2022-07-21 17:27:56	MN	CST	2022-07-21 11:27:56	6090	07/21/2022	11:27	2400.9	2419.9	2185.82	2593.11	0.186337	242.876	5.9	1	1	适合作为反演案例
109	ZY1F_AHSI_W94.55_N32.17_20231210_010251_L1A0000608285	Martin Lake_20231210	Martin Lake	32.2597	-94.5703	ZY1F	20231210	2023-12-10 17:27:08	2023-12-10 17:27:08	TX	CST	2023-12-10 11:27:08	6146	12/10/2023	11:27	1027.6	1026.4	931.733	1044.01	0.120503	125.719	4.79	-1	1	有羽流
110	ZY1F_AHSI_W94.55_N38.38_20220920_003853_L1A0000229994	La Cygne_20220920	La Cygne	38.3472	-94.6467	ZY1F	20220920	2022-09-20 17:24:31	2022-09-20 17:24:31	KS	CST	2022-09-20 11:24:31	1241	09/20/2022	11:24	759.1	765.6	691.003	518.877	0.249095	63.0139	5.01	-1	1	水汽影响太大了
111	ZY1F_AHSI_W94.56_N38.38_20230816_008587_L1A0000512042	La Cygne_20230816	La Cygne	38.3472	-94.6467	ZY1F	20230816	2023-08-16 17:31:23	2023-08-16 17:31:23	KS	CST	2023-08-16 11:31:23	1241	08/16/2023	11:31	1273.7	1441.1	1233.94	783.872	0.364743	80.8277	2.8	-1	-3	飘到湖面上了
112	ZY1F_AHSI_W94.57_N32.17_20220802_003150_L1A0000184740	Martin Lake_20220802	Martin Lake	32.2597	-94.5703	ZY1F	20220802	2022-08-02 17:17:29	2022-08-02 17:17:29	TX	CST	2022-08-02 11:17:29	6146	08/02/2022	11:17	2263.6	2623.6	2146.04	1252.94	0.416159	114.816	3.39	1	-3	有排放，圆形，堆叠状，飘到湖面上
113	ZY1F_AHSI_W94.58_N38.38_20230108_005431_L1A0000329362	La Cygne_20230108	La Cygne	38.3472	-94.6467	ZY1F	20230108	2023-01-08 17:27:27	2023-01-08 17:27:27	KS	CST	2023-01-08 11:27:27	1241	01/08/2023	11:27	1406.5	1398.2	1272.57	387.585	0.695431	60.5114	1.35	-1	-10	噪声较大
114	ZY1F_AHSI_W94.61_N32.17_20221120_004728_L1A0000290523	Martin Lake_20221120	Martin Lake	32.2597	-94.5703	ZY1F	20221120	2022-11-20 17:20:45	2022-11-20 17:20:45	TX	CST	2022-11-20 11:20:45	6146	11/20/2022	11:20	2635.2	2664.4	2399.44	2206.75	0.0803063	375.251	2.97	-1	1	有一点羽流比较稀疏
115	ZY1F_AHSI_W96.64_N31.29_20220727_003064_L1A0000178119	Oak Grove_20220727	Oak Grove	31.185	-96.4853	ZY1F	20220727	2022-07-27 17:24:51	2022-07-27 17:24:51	TX	CST	2022-07-27 11:24:51	6180	07/27/2022	11:24	1241	1493.7	1217.51	983.823	0.191941	130.314	3.79	-1	1
116	ZY1F_AHSI_W96.65_N31.29_20230304_006220_L1A0000378222	Oak Grove_20230304	Oak Grove	31.185	-96.4853	ZY1F	20230304	2023-03-04 17:30:35	2023-03-04 17:30:35	TX	CST	2023-03-04 11:30:35	6180	03/04/2023	11:30	650.4	654.3	591.802	771.462	0.303581	104.267	3.8	1	1	被云挡住了
117	ZY1F_AHSI_W96.65_N31.29_20230816_008587_L1A0000512058	Oak Grove_20230816	Oak Grove	31.185	-96.4853	ZY1F	20230816	2023-08-16 17:33:23	2023-08-16 17:33:23	TX	CST	2023-08-16 11:33:23	6180	08/16/2023	11:33	1820.5	1806.6	1644.59	1819.79	0.106528	344.297	2.6	-1	1	羽流很好，简直完美！！！适合作为案例
118	ZY1F_AHSI_W96.67_N31.29_20230108_005431_L1A0000329378	Oak Grove_20230108	Oak Grove	31.185	-96.4853	ZY1F	20230108	2023-01-08 17:29:27	2023-01-08 17:29:27	TX	CST	2023-01-08 11:29:27	6180	01/08/2023	11:29	1957.3	1974.5	1783.17	1804.26	0.011824	208.763	4.4	1	1	有羽流，水池下方有一个点源
119	ZY1F_AHSI_W97.01_N29.95_20230304_006220_L1A0000378225	Sam Seymour_20230304	Sam Seymour	29.9172	-96.7506	ZY1F	20230304	2023-03-04 17:30:57	2023-03-04 17:30:57	TX	CST	2023-03-04 11:30:57	6179	03/04/2023	11:30	672.8	881.2	704.883	1118.88	0.587335	185.396	3.01	-1	1
120	ZY1F_AHSI_W97.01_N29.95_20230816_008587_L1A0000512061	Sam Seymour_20230816	Sam Seymour	29.9172	-96.7506	ZY1F	20230816	2023-08-16 17:33:45	2023-08-16 17:33:45	TX	CST	2023-08-16 11:33:45	6179	08/16/2023	11:33	1354.8	1363.7	1233.49	1192.34	0.0333667	252.45	2.37	1	1
121	ZY1F_AHSI_W98.47_N29.51_20221013_004183_L1A0000250381	J K Spruce_20221013	J K Spruce	29.3091	-98.3205	ZY1F	20221013	2022-10-13 17:33:02	2022-10-13 17:33:02	TX	CST	2022-10-13 11:33:02	7097	10/13/2022	11:33	1492.3	1495.9	1355.59	1427.11	0.0527576	136.707	5.76	1	1	噪声较大

[truncated: 7 more sheets: 2024.7, 结果统计_0731, 2024.5(0530备份), 2024.4, 2024.4 (2), 2024.2, 补充说明]
