# Supplementary material for: Towards global carbon transparency: Spaceborne imaging spectroscopy enables precise CO2 emission quantification at facility scale
Source: Research Square preprint supplement (doi:10.21203/rs.3.rs-5913782/v1), 2025-01-29
Supplement: Supplementary file 37 [file 美国碳源反演(备份20250108).xlsx]

## Sheet: 2025.1.8
id	filename	foldername	facility	type	Latitude	Longitude	Altitude	satellite	date	Time of Satellite	UTC	State	Zone	Local Standard Time	Facility ID	day LST	time	前整点Q	后整点Q	avg Q(ton/h)	反演结果	反演误差	不确定度	IME_u (t/h)	Wind_u (t/h)	MF_u (ppm)	q	diff_dir	phi	风速	提取	排放	背景	备注
1	GF5_AHSI_W107.84_N40.19_20190803_006569_L10000052859	Craig_20190802	Craig	electricity	40.4627	-107.591	1939	GF5	20190803	2019-08-03 04:08:09	2019-08-02 20:08:09	CO	MST	2019-08-02 13:08:09	6021	08/02/2019	13:08	1356.3	1381	1233.4	1544.82	0.252486	255.483	37.3465	218.136	16.8162	8.53903	1.00418	1.0912	3.26	-1	0.7	0.0762875
2	GF5_AHSI_W111.09_N39.21_20191118_008126_L10000065664	Hunter_20191118	Hunter	electricity	39.1747	-111.029	1725	GF5	20191118	2019-11-18 04:20:29	2019-11-17 20:20:29	UT	MST	2019-11-17 13:20:29	6165	11/17/2019	13:20	889	885.7	805.489	832.967	0.0341127	99.8835	10.64	89.2435	9.07213	4.68331	160.343	48.6375	0.91	-1	0.7	0.0379813
3	GF5_AHSI_W85.14_N38.72_20191225_008664_L10000068784	Trimble County_20191225	Trimble County	electricity	38.5847	-85.4117	144	GF5	20191225	2019-12-25 02:36:43	2019-12-24 18:36:43	KY	EST	2019-12-24 13:36:43	6071	12/24/2019	13:36	1037.4	1080.8	964.737	837.032	0.132372	102.85	12.2065	90.6435	8.57702	6.46667	76.5812	27.0587	1.06	1	1	0.0293375
4	GF5A_AHSI_W101.6_N47.5_20240823_009093_L10000162368	Antelope Valley_20240823	Antelope Valley	electricity	47.3714	-101.834	590	GF5A	20240823	2024-08-23 19:29:30	2024-08-23 19:29:30	ND	CST	2024-08-23 13:29:30	6469	08/23/2024	13:29	988.6	878.5	848.567	641.71	0.243772	102.227	49.7947	52.4321	14.3295	5.08699	137.522	288.339	6.29	1	1	0.0573063
5	GF5A_AHSI_W102.1_N47.6_20240830_009196_L10000164953	Antelope Valley_20240830	Antelope Valley	electricity	47.3714	-101.834	590	GF5A	20240830	2024-08-30 19:31:07	2024-08-30 19:31:07	ND	CST	2024-08-30 13:31:07	6469	08/30/2024	13:31	538	546.6	492.096	746.753	0.517494	118.167	38.005	80.1619	12.0011	3.67416	173.639	254.67	4.4	-1	0.7	0.0449375
6	GF5A_AHSI_W107.6_N40.7_20231206_005292_L10000072037	Craig_20231206	Craig	electricity	40.4627	-107.591	1939	GF5A	20231206	2023-12-06 20:05:46	2023-12-06 20:05:46	CO	MST	2023-12-06 13:05:46	6021	12/06/2023	13:05	892.1	893.5	809.405	780.748	0.035405	101.378	17.6677	83.7107	14.9327	4.10681	40.0655	12.2868	0.92	-1	0.7	0.0438375
7	GF5A_AHSI_W107.6_N40.7_20240606_007957_L10000134130	Craig_20240606	Craig	electricity	40.4627	-107.591	1939	GF5A	20240606	2024-06-06 20:02:05	2024-06-06 20:02:05	CO	MST	2024-06-06 13:02:05	6021	06/06/2024	13:02	497.9	547.3	453.181	474.085	0.0461275	65.1359	12.8342	52.3017	8.86614	7.02238	163.287	73.4791	1.35	-1	0.7	0.0434312
8	GF5A_AHSI_W107.8_N40.2_20230916_004111_L10000052906	Craig_20230916	Craig	electricity	40.4627	-107.591	1939	GF5A	20230916	2023-09-16 20:09:27	2023-09-16 20:09:27	CO	MST	2023-09-16 13:09:27	6021	09/16/2023	13:09	962.5	957.4	872.471	1265	0.449908	294.437	23.6818	270.756	13.8098	4.6119	120.903	90.2744	2.24	1	1	0.0356901
9	GF5A_AHSI_W107.8_N40.2_20240613_008059_L10000136449	Craig_20240613	Craig	electricity	40.4627	-107.591	1939	GF5A	20240613	2024-06-13 20:03:23	2024-06-13 20:03:23	CO	MST	2024-06-13 13:03:23	6021	06/13/2024	13:03	1002.9	1051.9	912.038	1169.75	0.282563	171.082	34.7495	136.332	14.4225	11.5844	114.5	152.667	4	-1	0.7	0.0439935
10	GF5A_AHSI_W108.6_N36.7_20231227_005597_L10000078715	Four Corners Steam Elec Station_20231227	Four Corners Steam Elec Station	electricity	36.69	-108.481	1630	GF5A	20231227	2023-12-27 20:12:59	2023-12-27 20:12:59	NM	MST	2023-12-27 13:12:59	2442	12/27/2023	13:12	797	796.8	722.99	608.159	0.158828	82.5025	16.9676	65.5349	6.24215	3.5126	137.839	201.245	4.38	-1	0.7	0.063725
11	GF5A_AHSI_W108.5_N36.7_20240711_008467_L10000146576	Four Corners Steam Elec Station_20240711	Four Corners Steam Elec Station	electricity	36.69	-108.481	1630	GF5A	20240711	2024-07-11 20:09:06	2024-07-11 20:09:06	NM	MST	2024-07-11 13:09:06	2442	07/11/2024	13:09	1414.9	1415.2	1283.62	1634.26	0.273165	195.604	17.0795	178.524	6.25135	7.76358	95.5417	137.262	4.31	1	1	0.0750688
12	GF5A_AHSI_W108.8_N36.7_20240407_007083_L10000113789	Four Corners Steam Elec Station_20240407	Four Corners Steam Elec Station	electricity	36.69	-108.481	1630	GF5A	20240407	2024-04-07 20:11:50	2024-04-07 20:11:50	NM	MST	2024-04-07 13:11:50	2442	04/07/2024	13:11	1033.2	1037.1	937.952	1000.11	0.0662721	145.136	12.2592	132.876	4.95653	7.45664	41.9551	48.5281	3.47	1	1	0.04855
13	GF5A_AHSI_W100.9_N41.2_20230913_004068_L10000052333	Gerald Gentleman Station_20230913	Gerald Gentleman Station	electricity	41.0808	-101.141	948	GF5A	20230913	2023-09-13 19:40:39	2023-09-13 19:40:39	NE	CST	2023-09-13 13:40:39	6077	09/13/2023	13:40	1345.6	1339.6	1217.08	1527.69	0.255212	178.972	18.9114	160.06	6.18529	6.49617	131.893	199.159	4.53	1	1	0.0320312
14	GF5A_AHSI_W100.9_N41.2_20240610_008016_L10000135380	Gerald Gentleman Station_20240610	Gerald Gentleman Station	electricity	41.0808	-101.141	948	GF5A	20240610	2024-06-10 19:34:47	2024-06-10 19:34:47	NE	CST	2024-06-10 13:34:47	6077	06/10/2024	13:34	682.9	683.8	619.979	1116.36	0.800641	130.323	54.0225	76.301	15.1211	10.9217	86.9803	240.646	8.3	-1	0.5	0.0355375
15	GF5A_AHSI_W101.1_N41.2_20240229_006530_L10000101560	Gerald Gentleman Station_20240229	Gerald Gentleman Station	electricity	41.0808	-101.141	948	GF5A	20240229	2024-02-29 19:37:26	2024-02-29 19:37:26	NE	CST	2024-02-29 13:37:26	6077	02/29/2024	13:37	236	237.4	214.879	295.872	0.376924	43.2864	10.9018	32.3846	3.69524	4.0914	6.0771	8.7105	4.3	1	1	0.0833813
16	GF5A_AHSI_W101.2_N41.2_20240927_009603_L10000174913	Gerald Gentleman Station_20240927	Gerald Gentleman Station	electricity	41.0808	-101.141	948	GF5A	20240927	2024-09-27 19:34:25	2024-09-27 19:34:25	NE	CST	2024-09-27 13:34:25	6077	09/27/2024	13:34	1344	1343.3	1218.9	1334.46	0.09481	245.334	11.909	233.425	5.82703	6.94677	30.3649	26.9235	2.66	1	1	0.0659062
17	GF5A_AHSI_W101.4_N35.3_20231018_004577_L10000059390	Harrington Station_20231018	Harrington Station	electricity	35.2972	-101.748	1090	GF5A	20231018	2023-10-18 19:47:26	2023-10-18 19:47:26	TX	CST	2023-10-18 13:47:26	6193	10/18/2023	13:47	153	145.45	133.434	269.939	1.02301	31.7358	11.9845	19.7512	3.36537	4.21862	176.839	437.97	7.43	-1	0.5	0.0384437
18	GF5A_AHSI_W101.6_N35.3_20240411_007143_L10000114980	Harrington Station_20240411	Harrington Station	electricity	35.2972	-101.748	1090	GF5A	20240411	2024-04-11 19:44:10	2024-04-11 19:44:10	TX	CST	2024-04-11 13:44:10	6193	04/11/2024	13:44	635.1	519.6	499.314	355.397	0.28823	39.6855	4.22631	35.4591	3.70917	6.27586	114.976	5.36553	0.14	1	1	0.0495437
19	GF5A_AHSI_W101.7_N35.3_20230328_001612_L10000019840	Harrington Station_20230328	Harrington Station	electricity	35.2972	-101.748	1090	GF5A	20230328	2023-03-28 19:54:51	2023-03-28 19:54:51	TX	CST	2023-03-28 13:54:51	6193	03/28/2023	13:54	482.6	483.5	438.542	613.02	0.397859	73.9517	5.36099	68.5907	3.26429	4.61273	5.25312	2.80166	1.6	1	1	0.0283312
20	GF5A_AHSI_W101.7_N35.3_20240213_006298_L10000094521	Harrington Station_20240213	Harrington Station	electricity	35.2972	-101.748	1090	GF5A	20240213	2024-02-13 19:45:52	2024-02-13 19:45:52	TX	CST	2024-02-13 13:45:52	6193	02/13/2024	13:45	324.6	326.6	295.833	189.38	0.35984	34.8713	8.52924	26.3421	3.6404	4.12972	167.414	184.713	3.31	-1	0.7	0.0484812
21	GF5A_AHSI_W101.9_N35.3_20230904_003936_L10000050446	Harrington Station_20230904	Harrington Station	electricity	35.2972	-101.748	1090	GF5A	20230904	2023-09-04 19:50:29	2023-09-04 19:50:29	TX	CST	2023-09-04 13:50:29	6193	09/04/2023	13:50	760.5	701.1	645.008	539.946	0.162886	57.5411	19.064	38.4771	5.06564	4.67825	2.37178	6.12709	7.75	1	1	0.05045
22	GF5A_AHSI_W80.0_N39.2_20240312_006703_L10000103880	Harrison Power Station_20240312	Harrison Power Station	electricity	39.3844	-80.3325	299	GF5A	20240312	2024-03-12 18:14:51	2024-03-12 18:14:51	WV	EST	2024-03-12 13:14:51	3944	03/12/2024	13:14	1069.7	1073.1	971.135	1139.46	0.173327	147.81	22.8427	124.967	7.93278	6.79152	108.609	155.311	4.29	-1	0.7	0.0412125
23	GF5A_AHSI_W80.1_N39.2_20231115_004984_L10000065474	Harrison Power Station_20231115	Harrison Power Station	electricity	39.3844	-80.3325	299	GF5A	20231115	2023-11-15 18:17:57	2023-11-15 18:17:57	WV	EST	2023-11-15 13:17:57	3944	11/15/2023	13:17	1970.3	1977.4	1789.25	1631.76	0.0880213	216.585	24.7006	191.885	9.00685	5.51824	152.61	201.445	3.96	-1	0.7	0.0430625
24	GF5A_AHSI_W80.4_N39.2_20240319_006805_L10000106623	Harrison Power Station_20240319	Harrison Power Station	electricity	39.3844	-80.3325	299	GF5A	20240319	2024-03-19 18:16:18	2024-03-19 18:16:18	WV	EST	2024-03-19 13:16:18	3944	03/19/2024	13:16	1116	1043	994.758	938.887	0.0561657	106.875	24.171	82.7037	6.78806	4.20272	41.7708	78.8076	5.66	-1	0.7	0.0414812
25	GF5A_AHSI_W80.5_N39.2_20230819_003702_L10000047101	Harrison Power Station_20230819	Harrison Power Station	electricity	39.3844	-80.3325	299	GF5A	20230819	2023-08-19 18:21:53	2023-08-19 18:21:53	WV	EST	2023-08-19 13:21:53	3944	08/19/2023	13:21	1369.6	1357.3	1238.57	1461.69	0.180135	175.673	14.9042	160.769	9.24066	9.94416	4.08119	1.76852	1.3	1	1	0.0481688
26	GF5A_AHSI_W111.2_N39.2_20240928_009618_L10000175260	Hunter_20240928	Hunter	electricity	39.1747	-111.029	1725	GF5A	20240928	2024-09-28 20:16:35	2024-09-28 20:16:35	UT	MST	2024-09-28 13:16:35	6165	09/28/2024	13:16	538.7	545.3	490.297	403.727	0.176566	59.7247	14.5277	45.1971	9.71988	3.71266	148.89	79.9042	1.61	1	1	0.007
27	GF5A_AHSI_W98.5_N29.3_20230814_003630_L10000044804	J K Spruce_20230814	J K Spruce	electricity	29.3091	-98.3205	149	GF5A	20230814	2023-08-14 19:42:15	2023-08-14 19:42:15	TX	CST	2023-08-14 13:42:15	7097	08/14/2023	13:42	1389.2	1408.7	1272.64	1227.98	0.0350941	149.483	11.3647	138.118	5.90463	13.0267	24.606	13.9434	1.7	1	1	0.022475	完美
28	GF5A_AHSI_W98.0_N29.3_20230920_004169_L10000053680	J K Spruce_20230920	J K Spruce	electricity	29.3091	-98.3205	149	GF5A	20230920	2023-09-20 19:39:18	2023-09-20 19:39:18	TX	CST	2023-09-20 13:39:18	7097	09/20/2023	13:39	1303	1302.6	1181.83	1396.04	0.181255	223.368	13.2112	210.156	5.21595	11.3123	11.6499	11.8829	3.06	1	1	0.0139
29	GF5A_AHSI_W98.5_N29.3_20231217_005451_L10000075253	J K Spruce_20231217	J K Spruce	electricity	29.3091	-98.3205	149	GF5A	20231217	2023-12-17 19:38:50	2023-12-17 19:38:50	TX	CST	2023-12-17 13:38:50	7097	12/17/2023	13:38	556.7	558	505.777	580.484	0.147709	116.431	13.1528	103.278	5.44311	5.4731	69.7214	60.89	2.62	-1	0.7	0.0272312
30	GF5A_AHSI_W108.7_N41.7_20231213_005393_L10000074107	Jim Bridger_20231213	Jim Bridger	electricity	41.7378	-108.787	2044	GF5A	20231213	2023-12-13 20:08:54	2023-12-13 20:08:54	WY	MST	2023-12-13 13:08:54	8066	12/13/2023	13:08	1825.9	1677	1638.42	786.743	0.519816	120.627	28.9328	91.6938	12.3746	4.24097	89.5278	119.37	4	1	1	0.0471125
31	GF5A_AHSI_W108.8_N41.7_20230923_004213_L10000054221	Jim Bridger_20230923	Jim Bridger	electricity	41.7378	-108.787	2044	GF5A	20230923	2023-09-23 20:11:46	2023-09-23 20:11:46	WY	MST	2023-09-23 13:11:46	8066	09/23/2023	13:11	460.9	452.2	416.674	180.638	0.566476	27.7262	14.1182	13.608	4.34858	3.58401	29.0041	68.643	7.1	-1	0.5	0.0335937
32	GF5A_AHSI_W108.6_N41.7_20240803_008802_L10000154428	Jim Bridger_20240803	Jim Bridger	electricity	41.7378	-108.787	2044	GF5A	20240803	2024-08-03 20:04:32	2024-08-03 20:04:32	WY	MST	2024-08-03 13:04:32	8066	08/03/2024	13:04	1441.8	1634.1	1319.61	708.526	0.463078	91.0197	13.0036	78.0161	5.13308	6.20308	60.3414	85.8859	4.27	-1	0.7	0.0390187
33	GF5A_AHSI_W94.7_N38.2_20231008_004431_L10000057166	La Cygne_20231008	La Cygne	electricity	38.3472	-94.6467	263	GF5A	20231008	2023-10-08 19:17:58	2023-10-08 19:17:58	KS	CST	2023-10-08 13:17:58	1241	10/08/2023	13:17	654.4	647.1	591.785	571.487	0.0342998	92.837	15.4017	77.4353	6.10086	5.98225	123.505	139.972	3.4	-1	0.7	0.0483437
34	GF5A_AHSI_W94.3_N32.3_20230908_003994_L10000051261	Martin Lake_20230908	Martin Lake	electricity	32.2597	-94.5703	98	GF5A	20230908	2023-09-08 19:22:37	2023-09-08 19:22:37	TX	CST	2023-09-08 13:22:37	6146	09/08/2023	13:22	2712.1	2709.3	2459.44	3282.43	0.334624	464.745	29.8365	434.909	10.3527	11.6799	22.4367	26.0266	3.48	1	1	0.049025	有羽流、但周围水汽干扰也很大
35	GF5A_AHSI_W94.6_N32.3_20240224_006456_L10000098053	Martin Lake_20240224	Martin Lake	electricity	32.2597	-94.5703	98	GF5A	20240224	2024-02-24 19:19:38	2024-02-24 19:19:38	TX	CST	2024-02-24 13:19:38	6146	02/24/2024	13:19	742.7	741.2	673.335	983.351	0.460418	124.06	12.6851	111.374	6.24763	4.90738	79.414	48.7072	1.84	-1	0.7	0.0406188
36	GF5A_AHSI_W94.8_N32.3_20240422_007301_L10000118547	Martin Lake_20240422	Martin Lake	electricity	32.2597	-94.5703	98	GF5A	20240422	2024-04-22 19:19:10	2024-04-22 19:19:10	TX	CST	2024-04-22 13:19:10	6146	04/22/2024	13:19	723.8	716.7	654.581	678.391	0.0363751	92.0026	17.479	74.5236	9.80037	5.09303	84.381	36.0025	1.28	-1	0.7	0.0384437
37	GF5A_AHSI_W94.0_N45.6_20240714_008510_L10000147652	Sherburne County_20240714	Sherburne County	electricity	45.3792	-93.8958	292	GF5A	20240714	2024-07-14 19:02:06	2024-07-14 19:02:06	MN	CST	2024-07-14 13:02:06	6090	07/14/2024	13:02	1646	1631.2	1492.78	1037.22	0.305175	229.455	21.1093	208.346	10.0444	8.20767	3.07837	2.42165	2.36	1	1	0.0225125
38	GF5A_AHSI_W85.3_N38.7_20240414_007185_L10000115875	Trimble County_20240414	Trimble County	electricity	38.5847	-85.4117	144	GF5A	20240414	2024-04-14 18:35:41	2024-04-14 18:35:41	KY	EST	2024-04-14 13:35:41	6071	04/14/2024	13:35	1297.4	1354.6	1207.25	1758.43	0.456559	177.509	23.9988	153.511	6.67698	12.3829	18.0856	34.5434	5.73	1	1	0.045275
39	GF5A_AHSI_W92.0_N34.3_20240614_008073_L10000136769	White Bluff_20240614	White Bluff	electricity	34.4236	-92.1392	93	GF5A	20240614	2024-06-14 19:05:28	2024-06-14 19:05:28	AR	CST	2024-06-14 13:05:28	6009	06/14/2024	13:05	927.4	927.3	841.316	731.794	0.130179	101.299	18.3366	82.9627	9.68779	9.13038	173.421	107.521	1.86	-1	0.7	0.0392125
40	GF5B_AHSI_W101.6_N47.5_20220619_004161_L10000151101	Antelope Valley_20220619	Antelope Valley	electricity	47.371	-101.836	590	GF5B	20220619	2022-06-20 01:51:31	2022-06-19 17:51:31	ND	CST	2022-06-19 11:51:31	6469	06/19/2022	11:51	522.7	565.6	507.266	1272.26	1.50807	172.296	38.9984	133.298	11.9362	3.41855	127.072	191.879	4.53	-1	0	0.0873063
41	GF5B_AHSI_W102.0_N47.5_20220316_002777_L10000118963	Antelope Valley_20220316	Antelope Valley	electricity	47.371	-101.836	590	GF5B	20220316	2022-03-17 01:50:55	2022-03-16 17:50:55	ND	CST	2022-03-16 11:50:55	6469	03/16/2022	11:50	560.6	524.1	480.974	672.202	0.397583	81.5306	38.2061	43.3245	9.7894	7.49039	80.7576	247.118	9.18	-1	0	0.0418625
42	GF5B_AHSI_W102.1_N47.5_20220626_004263_L10000154923	Antelope Valley_20220626	Antelope Valley	electricity	47.371	-101.836	590	GF5B	20220626	2022-06-27 01:53:27	2022-06-26 17:53:27	ND	CST	2022-06-26 11:53:27	6469	06/26/2022	11:53	667	827.8	733.949	623.459	0.150541	95.0225	45.6791	49.3433	12.5443	4.20348	9.99462	21.9548	6.59	1	1	0.0692062	能看见一点
43	GF5B_AHSI_W102.0_N47.5_20230130_007439_L10000282305	Antelope Valley_20230130	Antelope Valley	electricity	47.3714	-101.834	590	GF5B	20230130	2023-01-31 01:57:28	2023-01-30 17:57:28	ND	CST	2023-01-30 11:57:28	6469	01/30/2023	11:57	1034.6	1033.4	937.539	1266.65	0.351042	206.596	72.6579	133.938	25.6654	3.54035	163.538	244.216	4.48	-1	0.7	0.0676563
44	GF5B_AHSI_W102.1_N47.5_20240623_014869_L10000537123	Antelope Valley_20240623	Antelope Valley	electricity	47.3714	-101.834	590	GF5B	20240623	2024-06-24 01:57:48	2024-06-23 17:57:48	ND	CST	2024-06-23 11:57:48	6469	06/23/2024	11:57	1055.5	1045.9	949.26	1088.83	0.147026	258.926	30.8945	228.031	14.6558	6.11031	117.537	89.3283	2.28	-1	0.7	0.0827937
45	GF5B_AHSI_W107.5_N40.2_20230926_010921_L10000396892	Craig_20230926	Craig	electricity	40.4627	-107.591	1939	GF5B	20230926	2023-09-27 02:12:39	2023-09-26 18:12:39	CO	MST	2023-09-26 11:12:39	6021	09/26/2023	11:12	761.2	909.1	717.384	852.217	0.187952	104.368	11.8292	92.5392	8.56715	7.36248	16.0703	5.89245	1.1	-1	0.7	0.05215
46	GF5B_AHSI_W107.8_N40.7_20221018_005924_L10000222668	Craig_20221018	Craig	electricity	40.4627	-107.591	1939	GF5B	20221018	2022-10-19 02:11:02	2022-10-18 18:11:02	CO	MST	2022-10-18 11:11:02	6021	10/18/2022	11:11	830.6	831.6	753.674	957.702	0.270711	117.737	10.4093	107.328	7.11936	6.2139	3.98094	2.16298	1.63	1	1	0.0565375	两个源
47	GF5B_AHSI_W107.6_N40.7_20240113_012509_L10000452553	Craig_20240113	Craig	electricity	40.4627	-107.591	1939	GF5B	20240113	2024-01-14 02:13:26	2024-01-13 18:13:26	CO	MST	2024-01-13 11:13:26	6021	01/13/2024	11:13	1143.7	1144.1	1037.63	864.429	0.166917	229.116	25.9193	203.196	16.9289	7.11332	142.891	99.0712	2.08	-1	0.7	0.0431313
48	GF5B_AHSI_W108.2_N36.7_20220610_004030_L10000145798	Four Corners Steam Elec Station_20220610	Four Corners Steam Elec Station	electricity	36.69	-108.481	1630	GF5B	20220610	2022-06-11 02:06:07	2022-06-10 18:06:07	NM	MST	2022-06-10 11:06:07	2442	06/10/2022	11:06	1471.5	1052.86	1296.94	1313.91	0.013084	216.588	12.5694	204.018	5.63675	12.1177	0.998694	0.988708	2.97	1	1	0.0724875	完美
49	GF5B_AHSI_W108.3_N36.7_20220420_003287_L10000117219	Four Corners Steam Elec Station_20220420	Four Corners Steam Elec Station	electricity	36.69	-108.481	1630	GF5B	20220420	2022-04-21 02:05:10	2022-04-20 18:05:10	NM	MST	2022-04-20 11:05:10	2442	04/20/2022	11:05	539.3	621.1	495.429	615.623	0.242607	136.572	9.00834	127.563	4.82815	5.58266	162.266	124.404	2.3	1	1	0.0774625	有排放
50	GF5B_AHSI_W108.3_N36.7_20240106_012407_L10000448627	Four Corners Steam Elec Station_20240106	Four Corners Steam Elec Station	electricity	36.69	-108.481	1630	GF5B	20240106	2024-01-07 02:12:33	2024-01-06 18:12:33	NM	MST	2024-01-06 11:12:33	2442	01/06/2024	11:12	1357.4	1191	1201.22	1221.5	0.0168834	156.579	22.0637	134.515	15.9322	7.16413	9.27573	4.08132	1.32	-1	0.7	0.0707125
51	GF5B_AHSI_W100.9_N41.2_20220628_004292_L10000156032	Gerald Gentleman Station_20220628	Gerald Gentleman Station	electricity	41.0808	-101.141	948	GF5B	20220628	2022-06-29 01:41:40	2022-06-28 17:41:40	NE	CST	2022-06-28 11:41:40	6077	06/28/2022	11:41	1314.5	1320.1	1195.97	850.626	0.288754	105.678	8.61435	97.0637	4.79302	17.4102	33.3561	22.2374	2	-1	0.7	0.0338313	24波段可见排放，有排放，但是算不准，靠近湖边
52	GF5B_AHSI_W101.1_N41.2_20211220_001524_L10000044164	Gerald Gentleman Station_20211220	Gerald Gentleman Station	electricity	41.0808	-101.141	948	GF5B	20211220	2021-12-21 01:37:21	2021-12-20 17:37:21	NE	CST	2021-12-20 11:37:21	6077	12/20/2021	11:37	1201.3	1283	1135.51	600.608	0.471066	81.0337	12.8281	68.2056	4.86762	4.67926	52.4801	72.0727	4.12	1	1	0.0158875
53	GF5B_AHSI_W100.9_N41.2_20220628_004292_L10000156032	Gerald Gentleman Station_20220628	Gerald Gentleman Station	electricity	41.0808	-101.141	948	GF5B	20220628	2022-06-29 01:41:40	2022-06-28 17:41:40	NE	CST	2022-06-28 11:41:40	6077	06/28/2022	11:41	1314.5	1320.1	1195.97	850.626	0.288754	105.678	8.61435	97.0637	4.79302	17.4102	33.3561	22.2374	2	-1	0.7	0.0338313
54	GF5B_AHSI_W101.9_N35.3_20220424_003345_L10000118254	Harrington Station_20220424	Harrington Station	electricity	35.2972	-101.748	1090	GF5B	20220424	2022-04-25 01:38:35	2022-04-24 17:38:35	TX	CST	2022-04-24 11:38:35	6193	04/24/2022	11:38	296.2	292.8	266.755	363.425	0.362395	41.7495	13.1903	28.5591	3.88651	3.73307	17.6714	39.2305	6.66	-1	0.5	0.0448812
55	GF5B_AHSI_W101.7_N35.3_20240301_013208_L10000477342	Harrington Station_20240301	Harrington Station	electricity	35.2972	-101.748	1090	GF5B	20240301	2024-03-02 01:44:39	2024-03-01 17:44:39	TX	CST	2024-03-01 11:44:39	6193	03/01/2024	11:44	142.7	143.5	129.987	194.154	0.493637	35.1904	13.5951	21.5953	4.67309	2.72557	126.835	178.414	4.22	-1	0	0.043975
56	GF5B_AHSI_W101.9_N35.3_20220424_003345_L10000118254	Harrington Station_20220424	Harrington Station	electricity	35.2972	-101.748	1090	GF5B	20220424	2022-04-25 01:38:35	2022-04-24 17:38:35	TX	CST	2022-04-24 11:38:35	6193	04/24/2022	11:38	296.2	292.8	266.755	363.425	0.362395	41.7495	13.1903	28.5591	3.88651	3.73307	17.6714	39.2305	6.66	-1	0.7	0.0448812
57	GF5B_AHSI_W101.9_N35.3_20240110_012465_L10000450920	Harrington Station_20240110	Harrington Station	electricity	35.2972	-101.748	1090	GF5B	20240110	2024-01-11 01:45:52	2024-01-10 17:45:52	TX	CST	2024-01-10 11:45:52	6193	01/10/2024	11:45	152.9	152.8	138.641	466.72	2.36641	53.4789	17.9931	35.4858	5.70755	3.92516	173.211	404.16	7	-1	0	0.0435875
58	GF5B_AHSI_W80.4_N39.2_20231012_011153_L10000404427	Harrison Power Station_20231012	Harrison Power Station	electricity	39.3844	-80.3325	299	GF5B	20231012	2023-10-13 00:23:33	2023-10-12 16:23:33	WV	EST	2023-10-12 11:23:33	3944	10/12/2023	11:23	229.9	228.3	208.005	391.725	0.883243	56.741	15.3547	41.3863	11.2241	8.25406	85.0392	20.6929	0.73	-1	0.5	0.0482375	伪排放
59	GF5B_AHSI_W80.2_N39.2_20240313_013382_L10000483618	Harrison Power Station_20240313	Harrison Power Station	electricity	39.3844	-80.3325	299	GF5B	20240313	2024-03-14 00:22:14	2024-03-13 16:22:14	WV	EST	2024-03-13 11:22:14	3944	03/13/2024	11:22	1067.4	1067.2	968.262	1114.27	0.150793	218.347	16.6216	201.726	7.26946	9.17965	19.6097	16.8644	2.58	-1	0.7	0.063475
60	GF5B_AHSI_W80.4_N39.2_20240122_012639_L10000457433	Harrison Power Station_20240122	Harrison Power Station	electricity	39.3844	-80.3325	299	GF5B	20240122	2024-01-23 00:23:19	2024-01-22 16:23:19	WV	EST	2024-01-22 11:23:19	3944	01/22/2024	11:23	1467.2	1460.1	1328.55	1441.33	0.0848885	348.784	24.0401	324.744	12.6602	4.88978	158.937	113.905	2.15	-1	0.7	0.059925
61	GF5B_AHSI_W110.9_N39.2_20220418_003258_L10000114473	Hunter_20220418	Hunter	electricity	39.1747	-111.029	1725	GF5B	20220418	2022-04-19 02:17:59	2022-04-18 18:17:59	UT	MST	2022-04-18 11:17:59	6165	04/18/2022	11:17	909.6	899.7	822.631	663.185	0.193824	75.7678	6.46636	69.3014	5.24596	8.79682	13.4157	2.68314	0.6	-1	0.7	0.0246625	低风速
62	GF5B_AHSI_W110.9_N39.2_20240104_012378_L10000447404	Hunter_20240104	Hunter	electricity	39.1747	-111.029	1725	GF5B	20240104	2024-01-05 02:25:25	2024-01-04 18:25:25	UT	MST	2024-01-04 11:25:25	6165	01/04/2024	11:25	353.2	352.6	320.191	584.059	0.824096	71.9252	10.8923	61.0329	9.25425	5.53036	164.418	32.8835	0.6	-1	0.5	0.0612625
63	GF5B_AHSI_W98.2_N29.3_20240204_012829_L10000463990	J K Spruce_20240204	J K Spruce	electricity	29.3091	-98.3205	149	GF5B	20240204	2024-02-05 01:25:53	2024-02-04 17:25:53	TX	CST	2024-02-04 11:25:53	7097	02/04/2024	11:25	534.5	536.5	485.646	881.794	0.815712	84.5898	24.2339	60.3559	6.14357	4.08228	14.8908	41.0987	8.28	-1	0.5	0.032375
64	GF5B_AHSI_W98.6_N29.3_20240211_012931_L10000467494	J K Spruce_20240211	J K Spruce	electricity	29.3091	-98.3205	149	GF5B	20240211	2024-02-12 01:27:36	2024-02-11 17:27:36	TX	CST	2024-02-11 11:27:36	7097	02/11/2024	11:27	559.5	524.3	493.2	694.023	0.407183	84.6442	24.5127	60.1315	7.4029	4.10638	129.583	250.096	5.79	1	1	0.0255125
65	GF5B_AHSI_W108.8_N41.7_20220212_002311_L10000077220	Jim Bridger_20220212	Jim Bridger	electricity	41.7378	-108.787	2044	GF5B	20220212	2022-02-13 02:10:06	2022-02-12 18:10:06	WY	MST	2022-02-12 11:10:06	8066	02/12/2022	11:10	580.1	545	520.951	889.996	0.708407	110.012	16.0768	93.9354	6.11913	7.00465	82.2714	123.133	4.49	1	1	0.0355562	有排放，但周围噪声明显更大，不适合反演
66	GF5B_AHSI_W109.0_N41.6_20231031_011431_L10000413197	Jim Bridger_20231031	Jim Bridger	electricity	41.7378	-108.787	2044	GF5B	20231031	2023-11-01 02:20:04	2023-10-31 18:20:04	WY	MST	2023-10-31 11:20:04	8066	10/31/2023	11:20	1208.8	1174.8	1086.32	1071.42	0.0137214	107.445	17.064	90.3814	5.68249	5.91724	48.7785	97.7196	6.01	-1	0.7	0.0386625
67	GF5B_AHSI_W109.1_N41.6_20231221_012174_L10000440228	Jim Bridger_20231221	Jim Bridger	electricity	41.7378	-108.787	2044	GF5B	20231221	2023-12-22 02:20:37	2023-12-21 18:20:37	WY	MST	2023-12-21 11:20:37	8066	12/21/2023	11:20	994.7	868	864.063	585.226	0.322705	104.899	20.1834	84.7155	9.8608	4.16843	170.105	180.311	3.18	1	1	0.0353
68	GF5B_AHSI_W94.5_N38.2_20221019_005938_L10000223276	La Cygne_20221019	La Cygne	electricity	38.3472	-94.6467	263	GF5B	20221019	2022-10-20 01:15:33	2022-10-19 17:15:33	KS	CST	2022-10-19 11:15:33	1241	10/19/2022	11:15	708.8	713.2	644.01	463.681	0.280011	95.3591	12.1465	83.2127	5.00181	6.30329	160.814	139.372	2.6	-1	0.7	0.062575	32波段可见排放源
69	GF5B_AHSI_W94.3_N32.3_20231103_011474_L10000414550	Martin Lake_20231103	Martin Lake	electricity	32.2597	-94.5703	98	GF5B	20231103	2023-11-04 01:12:54	2023-11-03 17:12:54	TX	CST	2023-11-03 11:12:54	6146	11/03/2023	11:12	1488.1	1487.9	1349.95	1362.69	0.00944042	296.402	19.8692	276.533	9.52309	6.62079	43.7369	34.1148	2.34	-1	0.7	0.0438562	有羽流，水面噪声大
70	GF5B_AHSI_W94.5_N32.3_20220407_003097_L10000107611	Martin Lake_20220407	Martin Lake	electricity	32.2597	-94.5703	98	GF5B	20220407	2022-04-08 01:05:50	2022-04-07 17:05:50	TX	CST	2022-04-07 11:05:50	6146	04/07/2022	11:05	1469.4	1514	1336.39	1328.55	0.00586396	139.518	29.3761	110.142	7.74544	6.98061	36	73.92	6.16	-1	0.7	0.04465
71	GF5B_AHSI_W94.3_N32.3_20240404_013703_L10000494997	Martin Lake_20240404	Martin Lake	electricity	32.2597	-94.5703	98	GF5B	20240404	2024-04-05 01:12:16	2024-04-04 17:12:16	TX	CST	2024-04-04 11:12:16	6146	04/04/2024	11:12	1103	1115	1002.8	1928.69	0.9233	292.729	24.4559	268.273	8.67321	11.6365	82.4111	90.927	3.31	-1	0.7	0.0385187
72	GF5B_AHSI_W94.4_N32.3_20230906_010629_L10000386730	Martin Lake_20230906	Martin Lake	electricity	32.2597	-94.5703	98	GF5B	20230906	2023-09-07 01:13:22	2023-09-06 17:13:22	TX	CST	2023-09-06 11:13:22	6146	09/06/2023	11:13	2665.3	2675.5	2419.92	1910.32	0.210586	348.401	22.4054	325.996	9.25999	7.09863	13.8401	12.5484	2.72	-1	0.7	0.0471312
73	GF5B_AHSI_W94.4_N32.3_20240213_012960_L10000468942	Martin Lake_20240213	Martin Lake	electricity	32.2597	-94.5703	98	GF5B	20240213	2024-02-14 01:13:08	2024-02-13 17:13:08	TX	CST	2024-02-13 11:13:08	6146	02/13/2024	11:13	1097.1	1103.7	996.57	1665.16	0.670889	199.183	16.0345	183.148	9.09611	5.53475	158.532	68.6973	1.3	-1	0.7	0.0434063
74	GF5B_AHSI_W94.5_N32.1_20230717_009886_L10000361780	Martin Lake_20230717	Martin Lake	electricity	32.2597	-94.5703	98	GF5B	20230717	2023-07-18 01:13:09	2023-07-17 17:13:09	TX	CST	2023-07-17 11:13:09	6146	07/17/2023	11:13	2491.4	2702.3	2301.61	2759.44	0.198914	353.617	29.8526	323.765	10.2314	10.9841	58.4662	77.3702	3.97	-1	0.7	0.0504062
75	GF5B_AHSI_W94.8_N32.3_20240601_014548_L10000524560	Martin Lake_20240601	Martin Lake	electricity	32.2597	-94.5703	98	GF5B	20240601	2024-06-02 01:13:43	2024-06-01 17:13:43	TX	CST	2024-06-01 11:13:43	6146	06/01/2024	11:13	647.8	634	584.962	935.909	0.599949	124.288	19.9655	104.322	12.0335	7.34456	168.96	86.1696	1.53	-1	0.7	0.0445625
76	GF5B_AHSI_W96.5_N31.3_20221019_005938_L10000223290	Oak Grove_20221019	Oak Grove	electricity	31.185	-96.4853	129	GF5B	20221019	2022-10-20 01:17:28	2022-10-19 17:17:28	TX	CST	2022-10-19 11:17:28	6180	10/19/2022	11:17	1788.5	1803.2	1626.28	1959.27	0.204759	233.938	15.3063	218.632	7.74811	15.9355	46.4769	24.0131	1.55	-1	0.7	0.0297437	有排放
77	GF5B_AHSI_W96.9_N29.8_20221019_005938_L10000223293	Sam Seymour_20221019	Sam Seymour	electricity	29.9172	-96.7506	115	GF5B	20221019	2022-10-20 01:17:53	2022-10-19 17:17:53	TX	CST	2022-10-19 11:17:53	6179	10/19/2022	11:17	964.3	979	878.577	853.344	0.0287194	164.137	11.6571	152.48	4.49569	6.36253	157.782	137.27	2.61	-1	0.7	0.0209875
78	GF5B_AHSI_W88.6_N37.1_20231212_012042_L10000435322	Shawnee_20231212	Shawnee	electricity	37.1517	-88.775	105	GF5B	20231212	2023-12-13 00:54:21	2023-12-12 16:54:21	KY	CST	2023-12-12 10:54:21	1379	12/12/2023	10:54	943.299	928	843.255	765.836	0.0918096	98.6237	12.1814	86.4423	6.75291	5.07017	129.663	76.5014	1.77	-1	0.7	0.0422063	羽流飘到了水面上，水汽干扰大
79	GF5B_AHSI_W88.6_N37.2_20220326_002922_L10000100107	Shawnee_20220326	Shawnee	electricity	37.1517	-88.775	105	GF5B	20220326	2022-03-27 00:46:28	2022-03-26 16:46:28	KY	CST	2022-03-26 10:46:28	1379	03/26/2022	10:46	811.401	780.998	714.945	934.195	0.306667	103.691	20.8622	82.8285	5.57866	4.91551	162.886	304.597	5.61	-1	0.7	0.0356438	羽流飘到了水面上，水汽干扰大
80	GF5B_AHSI_W88.7_N37.2_20230825_010454_L10000380643	Shawnee_20230825	Shawnee	electricity	37.1517	-88.775	105	GF5B	20230825	2023-08-26 00:54:41	2023-08-25 16:54:41	KY	CST	2023-08-25 10:54:41	1379	08/25/2023	10:54	1266.6	1261.2	1144.63	1157.35	0.0111123	230.534	23.7326	206.801	10.0136	7.87344	118.857	103.406	2.61	-1	0.7	0.0513438	有排放，圆形，无羽流形状
81	GF5B_AHSI_W94.2_N45.6_20220602_003913_L10000141558	Sherburne County_20220602	Sherburne County	electricity	45.3792	-93.8958	292	GF5B	20220602	2022-06-03 01:19:01	2022-06-02 17:19:01	MN	CST	2022-06-02 11:19:01	6090	06/02/2022	11:19	411.9	411.2	373.468	569.558	0.525049	81.2547	24.5175	56.7373	7.57318	3.45015	54.1627	87.0213	4.82	-1	0.7	0.036
82	GF5B_AHSI_W85.2_N38.7_20231031_011430_L10000413176	Trimble County_20231031	Trimble County	electricity	38.5847	-85.4117	144	GF5B	20231031	2023-11-01 00:42:01	2023-10-31 16:42:01	KY	EST	2023-10-31 11:42:01	6071	10/31/2023	11:42	278.2	284.99	256.691	992.23	2.86547	168.901	26.171	142.73	9.6528	5.90156	36.4664	38.8975	3.2	-1	0.5	0.048225	探测到了，但算的不准（该案例说明GF5的探测下限达到256t/h, 3m/s）
83	GF5B_AHSI_W85.3_N38.7_20230714_009842_L10000360353	Trimble County_20230714	Trimble County	electricity	38.5847	-85.4117	144	GF5B	20230714	2023-07-15 00:42:09	2023-07-14 16:42:09	KY	EST	2023-07-14 11:42:09	6071	07/14/2023	11:42	1373.5	1399.05	1262.24	1450.72	0.149317	182.087	20.4702	161.616	11.4319	7.95761	16.6218	8.42173	1.52	1	1	0.052025
84	GF5B_AHSI_W92.2_N34.3_20231006_011066_L10000401605	White Bluff_20231006	White Bluff	electricity	34.4236	-92.1392	93	GF5B	20231006	2023-10-07 01:05:59	2023-10-06 17:05:59	AR	CST	2023-10-06 11:05:59	6009	10/06/2023	11:05	320	380.1	294.843	510.752	0.732287	112.23	27.7865	84.4438	12.9888	4.8617	60.2811	56.2624	2.8	-1	0.5	0.0541813
85	ZY1E_AHSI_W101.95_N47.64_20201123_006296_L1A0000193277	Antelope Valley_20201123	Antelope Valley	electricity	47.371	-101.836	590	ZY1E	20201123	2020-11-23 18:05:58	2020-11-23 18:05:58	ND	CST	2020-11-23 12:05:58	6469	11/23/2020	12:05	372.7	365.9	337.594	417.25	0.235954	53.9557	20.4119	33.5438	7.23912	8.15057	22.4736	48.2433	6.44	-1	0	0.0541688	这一景还是不太好反演
86	ZY1E_AHSI_W107.47_N40.60_20231007_021332_L1A0000663395	Craig_20231007	Craig	electricity	40.4627	-107.591	1939	ZY1E	20231007	2023-10-07 18:11:00	2023-10-07 18:11:00	CO	MST	2023-10-07 11:11:00	6021	10/07/2023	11:11	487.2	518.1	447.12	516.639	0.155482	70.7507	13.7204	57.0303	9.39571	3.83911	4.05055	1.83625	1.36	1	1	0.0556	有排放 不像羽流
87	ZY1E_AHSI_W107.63_N40.60_20230715_020127_L1A0000628485	Craig_20230715	Craig	electricity	40.4627	-107.591	1939	ZY1E	20230715	2023-07-15 18:14:00	2023-07-15 18:14:00	CO	MST	2023-07-15 11:14:00	6021	07/15/2023	11:14	892.4	903.4	811.9	1197.34	0.474744	213.476	16.2778	197.198	7.72764	7.4937	172.558	161.63	2.81	-1	0.7	0.0421625	19波段较好
88	ZY1E_AHSI_W108.64_N36.61_20200917_005334_L1A0000154763	Four Corners Steam Elec Station_20200917	Four Corners Steam Elec Station	electricity	36.69	-108.481	1630	ZY1E	20200917	2020-09-17 18:19:28	2020-09-17 18:19:28	NM	MST	2020-09-17 11:19:28	2442	09/17/2020	11:19	1507.6	1506	1367.21	1435.49	0.0499404	255.788	9.82525	245.963	4.62185	6.65403	71.6126	64.6901	2.71	1	1	0.07115	羽流形状好
89	ZY1E_AHSI_W108.72_N36.61_20231007_021332_L1A0000663404	Four Corners Steam Elec Station_20231007	Four Corners Steam Elec Station	electricity	36.69	-108.481	1630	ZY1E	20231007	2023-10-07 18:12:07	2023-10-07 18:12:07	NM	MST	2023-10-07 11:12:07	2442	10/07/2023	11:12	1532.3	1509.9	1386.01	1060.45	0.234893	127.023	7.74829	119.275	4.79945	11.5649	16.847	9.54663	1.7	1	1	0.075475	羽流很完整，可以作为案例
90	ZY1E_AHSI_W86.17_N36.17_20220327_013308_L1A0000425155	Gallatin_20220327	Gallatin	electricity	36.3156	-86.4006	140	ZY1E	20220327	2022-03-27 16:51:51	2022-03-27 16:51:51	TN	CST	2022-03-27 10:51:51	3403	03/27/2022	10:51	307	306.4	278.043	286.939	0.031994	75.9796	21.6186	54.361	9.50697	2.63933	76.3407	63.1083	2.48	-1	0.5	0.027275
91	ZY1E_AHSI_W86.59_N36.17_20221004_016048_L1A0000511602	Gallatin_20221004	Gallatin	electricity	36.3156	-86.4006	140	ZY1E	20221004	2022-10-04 16:51:33	2022-10-04 16:51:33	TN	CST	2022-10-04 10:51:33	3403	10/04/2022	10:51	758.6	764.3	692.586	791.633	0.14301	109.13	21.1349	87.9949	11.8997	6.95218	121.334	59.858	1.48	-1	0.7	0.0308563	像伪排放源
92	ZY1E_AHSI_W101.24_N41.04_20230805_020428_L1A0000637084	Gerald Gentleman Station_20230805	Gerald Gentleman Station	electricity	41.0808	-101.141	948	ZY1E	20230805	2023-08-05 17:48:20	2023-08-05 17:48:20	NE	CST	2023-08-05 11:48:20	6077	08/05/2023	11:48	1358.5	1357.1	1231.39	2493.72	1.02512	253.828	43.7131	210.115	12.8536	9.28425	19.0869	38.3011	6.02	-1	0.7	0.0268563
93	ZY1E_AHSI_W101.46_N35.28_20220305_012995_L1A0000414997	Harrington Station_20220305	Harrington Station	electricity	35.2972	-101.748	1090	ZY1E	20220305	2022-03-05 17:52:24	2022-03-05 17:52:24	TX	CST	2022-03-05 11:52:24	6193	03/05/2022	11:52	167.2	177.3	159.622	184.381	0.155106	26.6859	15.7873	10.8986	4.25049	4.59089	126.422	453.435	10.76	-1	0	0.0379875	排放强度太低了，无法检测到
94	ZY1E_AHSI_W101.95_N35.28_20220331_013368_L1A0000427095	Harrington Station_20220331	Harrington Station	electricity	35.2972	-101.748	1090	ZY1E	20220331	2022-03-31 17:54:08	2022-03-31 17:54:08	TX	CST	2022-03-31 11:54:08	6193	03/31/2022	11:54	641.9	638.7	579.709	671.099	0.157648	73.3219	11.0579	62.2641	3.51887	6.74526	9.12498	16.06	5.28	1	1	0.0470625
95	ZY1E_AHSI_W111.21_N39.27_20201004_005578_L1A0000168618	Hunter_20201004	Hunter	electricity	39.1747	-111.029	1725	ZY1E	20201004	2020-10-04 18:32:36	2020-10-04 18:32:36	UT	MST	2020-10-04 11:32:36	6165	10/04/2020	11:32	656	681.6	607.499	783.192	0.289207	189.702	11.133	178.569	6.52555	6.54078	51.9697	36.8985	2.13	1	1	0.0165812	完美
96	ZY1E_AHSI_W111.31_N39.27_20200905_005163_L1A0000144224	Hunter_20200905	Hunter	electricity	39.1747	-111.029	1725	ZY1E	20200905	2020-09-05 18:32:32	2020-09-05 18:32:32	UT	MST	2020-09-05 11:32:32	6165	09/05/2020	11:32	1057.9	1295.6	1074.72	956.178	0.110298	119.493	10.8355	108.658	6.57145	7.63792	22.4944	14.3214	1.91	-1	0.7	0.00791875	有羽流
97	ZY1E_AHSI_W98.07_N29.51_20220930_015991_L1A0000509878	J K Spruce_20220930	J K Spruce	electricity	29.3091	-98.3205	149	ZY1E	20220930	2022-09-30 17:31:53	2022-09-30 17:31:53	TX	CST	2022-09-30 11:31:53	7097	09/30/2022	11:31	1501.1	1499.5	1361.03	1184.41	0.129763	148.483	15.8886	132.594	8.62854	14.2649	41.4006	22.2183	1.61	-1	0.7	0.0173875	有噪声，有羽流
98	ZY1E_AHSI_W98.20_N29.06_20220418_013626_L1A0000435959	J K Spruce_20220418	J K Spruce	electricity	29.3091	-98.3205	149	ZY1E	20220418	2022-04-18 17:33:49	2022-04-18 17:33:49	TX	CST	2022-04-18 11:33:49	7097	04/18/2022	11:33	629.1	628.9	570.61	648.389	0.136308	73.7614	21.6358	52.1256	6.11914	6.86404	170.841	366.739	6.44	-1	0.7	0.0274688
99	ZY1E_AHSI_W98.50_N29.51_20200930_005521_L1A0000170469	J K Spruce_20200930	J K Spruce	electricity	29.3091	-98.3205	149	ZY1E	20200930	2020-09-30 17:33:03	2020-09-30 17:33:03	TX	CST	2020-09-30 11:33:03	7097	09/30/2020	11:33	914.9	958.2	851.588	1016.11	0.193198	166.559	19.4697	147.089	7.28708	9.05522	116.942	123.958	3.18	-1	0.7	0.0273688
100	ZY1E_AHSI_W98.51_N29.06_20201029_005935_L1A0000194928	J K Spruce_20201029	J K Spruce	electricity	29.3091	-98.3205	149	ZY1E	20201029	2020-10-29 17:33:12	2020-10-29 17:33:12	TX	CST	2020-10-29 11:33:12	7097	10/29/2020	11:33	508.1	564.9	489.281	461.32	0.0571469	58.5345	24.002	34.5325	6.82703	5.10618	0.403266	0.963806	7.17	1	1	0.0222437	有团块排放
101	ZY1E_AHSI_W98.53_N29.51_20220514_013997_L1A0000447750	J K Spruce_20220514	J K Spruce	electricity	29.3091	-98.3205	149	ZY1E	20220514	2022-05-14 17:35:16	2022-05-14 17:35:16	TX	CST	2022-05-14 11:35:16	7097	05/14/2022	11:35	1041	1035.2	941.31	1195.36	0.269889	289.867	15.6811	274.186	7.68078	11.0935	24.8087	17.5315	2.12	-1	0.7	0.0294188
102	ZY1E_AHSI_W108.68_N41.92_20200911_005248_L1A0000148906	Jim Bridger_20200911	Jim Bridger	electricity	41.7378	-108.787	2044	ZY1E	20200911	2020-09-11 18:24:53	2020-09-11 18:24:53	WY	MST	2020-09-11 11:24:53	8066	09/11/2020	11:24	1437.4	1314.4	1259.35	1710.25	0.358041	149.183	20.4624	128.721	6.60441	6.79421	63.6503	150.851	7.11	-1	0.7	0.063525	排放位置在山上，不像排放源
103	ZY1E_AHSI_W108.78_N41.92_20200813_004832_L1A0000126505	Jim Bridger_20200813	Jim Bridger	electricity	41.7378	-108.787	2044	ZY1E	20200813	2020-08-13 18:24:46	2020-08-13 18:24:46	WY	MST	2020-08-13 11:24:46	8066	08/13/2020	11:24	1902.1	1640.8	1630.74	1370.89	0.159343	136.954	12.0808	124.873	4.1694	8.24685	33.7319	60.8299	5.41	1	1	0.0555812	羽流形状很好，不过怎么风速有点问题
104	ZY1E_AHSI_W94.33_N38.38_20211206_011716_L1A0000374910	La Cygne_20211206	La Cygne	electricity	38.3472	-94.6467	263	ZY1E	20211206	2021-12-06 17:27:03	2021-12-06 17:27:03	KS	CST	2021-12-06 11:27:03	1241	12/06/2021	11:27	365.5	442.9	363.173	348.696	0.0398624	59.2032	24.2346	34.9686	7.83144	5.52911	154.044	245.443	4.78	-1	0.5	0.0279125
105	ZY1E_AHSI_W94.44_N38.38_20210913_010511_L1A0000334632	La Cygne_20210913	La Cygne	electricity	38.3472	-94.6467	263	ZY1E	20210913	2021-09-13 17:27:32	2021-09-13 17:27:32	KS	CST	2021-09-13 11:27:32	1241	09/13/2021	11:27	662.6	671	604.53	629.251	0.0408933	94.8137	37.4958	57.3179	12.5655	6.36248	58.2375	105.022	5.41	-1	0.5	0.044475
106	ZY1E_AHSI_W94.49_N38.38_20200711_004357_L1A0000107667	La Cygne_20200711	La Cygne	electricity	38.3472	-94.6467	263	ZY1E	20200711	2020-07-11 17:23:19	2020-07-11 17:23:19	KS	CST	2020-07-11 11:23:19	1241	07/11/2020	11:23	1601.4	1598	1451.58	1991.16	0.371714	370.743	30.9524	339.79	13.2889	13.2576	13.3357	12.091	2.72	1	1	0.0438062	反演效果不好，只有一团排放；感觉有点像是把水汽也核算进去了，偏高很多；误差太大了
107	ZY1E_AHSI_W90.79_N38.83_20210925_010683_L1A0000340283	Labadie_20210925	Labadie	electricity	38.5583	-90.8361	146	ZY1E	20210925	2021-09-25 17:13:23	2021-09-25 17:13:23	MO	CST	2021-09-25 11:13:23	2103	09/25/2021	11:13	1746.6	1732.6	1581.74	1477.32	0.0660171	261.302	29.4539	231.849	12.1852	6.86417	2.74145	2.68662	2.94	1	1	0.0544063
108	ZY1E_AHSI_W90.90_N38.38_20220113_012261_L1A0000391512	Labadie_20220113	Labadie	electricity	38.5583	-90.8361	146	ZY1E	20220113	2022-01-13 17:13:19	2022-01-13 17:13:19	MO	CST	2022-01-13 11:13:19	2103	01/13/2022	11:13	1841.4	1849.6	1672.1	1083.04	0.352289	140.469	18.4675	122.001	10.7721	4.98901	124.233	71.641	1.73	-1	0.7	0.041875
109	ZY1E_AHSI_W90.98_N38.38_20230329_018573_L1A0000585856	Labadie_20230329	Labadie	electricity	38.5583	-90.8361	146	ZY1E	20230329	2023-03-29 17:07:56	2023-03-29 17:07:56	MO	CST	2023-03-29 11:07:56	2103	03/29/2023	11:07	2464.5	2453.2	2234.56	1938.24	0.13261	230.137	13.5009	216.636	7.01033	6.20069	4.015	2.11456	1.58	1	1	0.0442688	羽流沿着江面规整陈列
110	ZY1E_AHSI_W104.76_N41.92_20230917_021045_L1A0000655064	Laramie River_20230917	Laramie River	electricity	42.1103	-104.883	1393	ZY1E	20230917	2023-09-17 18:02:08	2023-09-17 18:02:08	WY	MST	2023-09-17 11:02:08	6204	09/17/2023	11:02	1667.1	1881.6	1518.85	1574.87	0.0368816	143.686	31.8157	111.87	8.45558	4.16364	172.905	448.975	7.79	-1	0.7	0.0451063	羽流良好
111	ZY1E_AHSI_W104.93_N41.92_20230625_019840_L1A0000620580	Laramie River_20230625	Laramie River	electricity	42.1103	-104.883	1393	ZY1E	20230625	2023-06-25 18:05:08	2023-06-25 18:05:08	WY	MST	2023-06-25 11:05:08	6204	06/25/2023	11:05	1043.4	1114.7	951.947	1178.4	0.23788	239.776	20.6217	219.154	10.0876	10.3877	127.687	107.257	2.52	1	1	0.066525	有排放
112	ZY1E_AHSI_W105.13_N42.36_20200825_005004_L1A0000136593	Laramie River_20200825	Laramie River	electricity	42.1103	-104.883	1393	ZY1E	20200825	2020-08-25 18:10:51	2020-08-25 18:10:51	WY	MST	2020-08-25 11:10:51	6204	08/25/2020	11:10	520.3	520.5	472.038	627.075	0.32844	104.186	11.9461	92.2402	5.16341	7.95905	168.891	176.209	3.13	-1	0.7	0.0381063
113	ZY1E_AHSI_W94.40_N32.17_20210401_008144_L1A0000261751	Martin Lake_20210401	Martin Lake	electricity	32.2597	-94.5703	98	ZY1E	20210401	2021-04-01 17:20:59	2021-04-01 17:20:59	TX	CST	2021-04-01 11:20:59	6146	04/01/2021	11:20	1201.3	1170.4	1080.46	1006.5	0.0684478	174.962	23.4455	151.517	9.26453	6.07439	171.17	174.594	3.06	-1	0.7	0.04435	有羽流
114	ZY1E_AHSI_W94.59_N32.17_20220303_012967_L1A0000414108	Martin Lake_20220303	Martin Lake	electricity	32.2597	-94.5703	98	ZY1E	20220303	2022-03-03 17:22:15	2022-03-03 17:22:15	TX	CST	2022-03-03 11:22:15	6146	03/03/2022	11:22	1866.9	1838.5	1684.18	1274.72	0.24312	145.463	12.4922	132.971	8.37224	7.03888	16.032	3.09952	0.58	-1	1	0.0434438	这一景本应该能够看到完美羽流的，但是羽流的方向刚好经过了湖面，导致出现一段非常大的异常高值
115	ZY1E_AHSI_W94.77_N32.17_20210104_006896_L1A0000221658	Martin Lake_20210104	Martin Lake	electricity	32.2597	-94.5703	98	ZY1E	20210104	2021-01-04 17:21:40	2021-01-04 17:21:40	TX	CST	2021-01-04 11:21:40	6146	01/04/2021	11:21	1286	1418.3	1208.65	1165.36	0.0358173	149.532	16.7965	132.735	9.59377	4.78936	40.439	26.4201	1.96	-1	0.5	0.0507375	水汽干扰大，几乎无反演结果
116	ZY1E_AHSI_W96.19_N31.29_20220130_012507_L1A0000399543	Oak Grove_20220130	Oak Grove	electricity	31.185	-96.4853	129	ZY1E	20220130	2022-01-30 17:28:05	2022-01-30 17:28:05	TX	CST	2022-01-30 11:28:05	6180	01/30/2022	11:28	1396	1398.9	1267.66	897.652	0.291881	114.24	21.7009	92.5394	6.98064	8.23632	82.6559	127.29	4.62	-1	0.7	0.0190875
117	ZY1E_AHSI_W96.23_N31.29_20220326_013296_L1A0000424559	Oak Grove_20220326	Oak Grove	electricity	31.185	-96.4853	129	ZY1E	20220326	2022-03-26 17:27:55	2022-03-26 17:27:55	TX	CST	2022-03-26 11:27:55	6180	03/26/2022	11:27	767.3	835.6	723.965	830.575	0.147259	133.788	17.9128	115.875	6.90581	8.21208	8.64284	9.50712	3.3	-1	0.7	0.0251563
118	ZY1E_AHSI_W96.26_N31.29_20201006_005607_L1A0000169633	Oak Grove_20201006	Oak Grove	electricity	31.185	-96.4853	129	ZY1E	20201006	2020-10-06 17:25:38	2020-10-06 17:25:38	TX	CST	2020-10-06 11:25:38	6180	10/06/2020	11:25	1874.4	1879.2	1702.24	1541.73	0.0942929	194.492	19.1304	175.362	10.8168	9.63164	2.80282	1.80315	1.93	-1	0.7	0.0304312	有排放，无羽流
119	ZY1E_AHSI_W96.28_N31.29_20210424_008474_L1A0000271419	Oak Grove_20210424	Oak Grove	electricity	31.185	-96.4853	129	ZY1E	20210424	2021-04-24 17:27:56	2021-04-24 17:27:56	TX	CST	2021-04-24 11:27:56	6180	04/24/2021	11:27	893.6	900.9	813.64	1338	0.644463	140.912	27.234	113.678	8.51841	9.80526	170.389	337.939	5.95	-1	0.7	0.0375562	偏高
120	ZY1E_AHSI_W96.41_N31.29_20211206_011716_L1A0000374926	Oak Grove_20211206	Oak Grove	electricity	31.185	-96.4853	129	ZY1E	20211206	2021-12-06 17:29:06	2021-12-06 17:29:06	TX	CST	2021-12-06 11:29:06	6180	12/06/2021	11:29	1798.7	1790.1	1627.98	1638.39	0.00639315	152.207	35.5472	116.66	9.85712	4.50301	152.929	395.576	7.76	1	1	0.0217938	有一点点羽流
121	ZY1E_AHSI_W96.58_N31.29_20200711_004359_L1A0000107694	Oak Grove_20200711	Oak Grove	electricity	31.185	-96.4853	129	ZY1E	20200711	2020-07-11 17:25:19	2020-07-11 17:25:19	TX	CST	2020-07-11 11:25:19	6180	07/11/2020	11:25	1869.6	1875.6	1698.34	1971.87	0.161059	303.459	25.021	278.438	9.1374	12.8693	1.63683	1.77868	3.26	1	1	0.0343313	羽流可以
122	ZY1E_AHSI_W96.74_N31.10_20200612_003941_L1A0000093912	Oak Grove_20200612	Oak Grove	electricity	31.185	-96.4853	129	ZY1E	20200612	2020-06-12 17:25:12	2020-06-12 17:25:12	TX	CST	2020-06-12 11:25:12	6180	06/12/2020	11:25	1759.1	1762.5	1597.11	1876.75	0.175091	252.185	33.4516	218.733	11.6421	10.8001	14.8252	19.7669	4	-1	0.7	0.0377062	排放羽流很清晰
123	ZY1E_AHSI_W96.55_N29.95_20220130_012507_L1A0000399546	Sam Seymour_20220130	Sam Seymour	electricity	29.9172	-96.7506	115	ZY1E	20220130	2022-01-30 17:28:28	2022-01-30 17:28:28	TX	CST	2022-01-30 11:28:28	6179	01/30/2022	11:28	1394.8	1390.4	1263.48	876.157	0.306552	158.818	15.6178	143.2	6.40762	8.66151	13.4543	12.6919	2.83	-1	0.7	0.0214875
124	ZY1E_AHSI_W96.59_N29.95_20220326_013296_L1A0000424562	Sam Seymour_20220326	Sam Seymour	electricity	29.9172	-96.7506	115	ZY1E	20220326	2022-03-26 17:28:17	2022-03-26 17:28:17	TX	CST	2022-03-26 11:28:17	6179	03/26/2022	11:28	1765.4	1773.9	1605.14	1826.82	0.138104	233.484	19.6218	213.862	6.82593	10.7273	29.6323	39.3122	3.98	1	1	0.083525	能看到排放，但羽流飘到了湖面上
125	ZY1E_AHSI_W96.65_N29.95_20210424_008474_L1A0000271422	Sam Seymour_20210424	Sam Seymour	electricity	29.9172	-96.7506	115	ZY1E	20210424	2021-04-24 17:28:19	2021-04-24 17:28:19	TX	CST	2021-04-24 11:28:19	6179	04/24/2021	11:28	1037.5	1164.7	995.055	1151.28	0.157007	118.887	23.3328	95.5545	6.75929	4.14205	167.481	343.336	6.15	1	1	0.0373
126	ZY1E_AHSI_W96.95_N29.95_20200711_004359_L1A0000107697	Sam Seymour_20200711	Sam Seymour	electricity	29.9172	-96.7506	115	ZY1E	20200711	2020-07-11 17:25:42	2020-07-11 17:25:42	TX	CST	2020-07-11 11:25:42	6179	07/11/2020	11:25	1793.1	1824.9	1638.69	1615.27	0.0142909	280.392	15.3813	265.011	6.25814	16.5075	36.5968	34.401	2.82	-1	0.7	0.0312375	有羽流，还不错，飘到水面上了，前16波段清晰；作为强吸收和弱吸收的案例
127	ZY1E_AHSI_W97.05_N29.95_20200612_003941_L1A0000093915	Sam Seymour_20200612	Sam Seymour	electricity	29.9172	-96.7506	115	ZY1E	20200612	2020-06-12 17:25:31	2020-06-12 17:25:31	TX	CST	2020-06-12 11:25:31	6179	06/12/2020	11:25	1467.5	1562.8	1367.32	1414.28	0.0343459	201.806	22.2143	179.592	7.48002	14.8057	15.7202	19.0738	3.64	1	1	0.02765	羽流形状很好，可以作为案例
128	ZY1E_AHSI_W88.87_N37.06_20211128_011601_L1A0000371189	Shawnee_20211128	Shawnee	electricity	37.1517	-88.775	105	ZY1E	20211128	2021-11-28 17:03:59	2021-11-28 17:03:59	KY	CST	2021-11-28 11:03:59	1379	11/28/2021	11:03	406.4	406.4	368.68	302.381	0.179827	60.6337	20.8964	39.7372	8.02407	3.21479	128.961	150.885	3.51	1	1	0.0540062	有排放
129	ZY1E_AHSI_W88.95_N37.06_20210119_007111_L1A0000229838	Shawnee_20210119	Shawnee	electricity	37.1517	-88.775	105	ZY1E	20210119	2021-01-19 17:02:53	2021-01-19 17:02:53	KY	CST	2021-01-19 11:02:53	1379	01/19/2021	11:02	868.501	669.401	781.87	639.524	0.182059	85.8298	14.3889	71.4409	8.69457	4.27976	151.407	79.2363	1.57	1	1	0.0245437	右下角伪排放源
130	ZY1E_AHSI_W89.08_N37.06_20201221_006696_L1A0000212411	Shawnee_20201221	Shawnee	electricity	37.1517	-88.775	105	ZY1E	20201221	2020-12-21 17:03:04	2020-12-21 17:03:04	KY	CST	2020-12-21 11:03:04	1379	12/21/2020	11:03	386.9	386.599	350.976	461.112	0.313799	61.0978	24.0278	37.07	7.74834	5.9281	63.6019	136.532	6.44	-1	0	0.0404813
131	ZY1E_AHSI_W93.56_N45.45_20220320_013210_L1A0000421897	Sherburne County_20220320	Sherburne County	electricity	45.3792	-93.8958	292	ZY1E	20220320	2022-03-20 17:31:14	2022-03-20 17:31:14	MN	CST	2022-03-20 11:31:14	6090	03/20/2022	11:31	1451.2	1311.2	1250.89	1076.81	0.139161	146.783	24.417	122.366	13.5499	5.7328	4.62706	2.94589	1.91	-1	0.7	0.0484687
132	ZY1E_AHSI_W94.02_N45.45_20220927_015948_L1A0000508557	Sherburne County_20220927	Sherburne County	electricity	45.3792	-93.8958	292	ZY1E	20220927	2022-09-27 17:31:08	2022-09-27 17:31:08	MN	CST	2022-09-27 11:31:08	6090	09/27/2022	11:31	1052.9	1052.9	955.175	1049.2	0.0984389	181.651	36.9981	144.653	15.1422	4.84158	22.8149	25.4006	3.34	-1	0.7	0.0586125	有羽流
133	ZY1E_AHSI_W85.49_N38.38_20220327_013308_L1A0000425150	Trimble County_20220327	Trimble County	electricity	38.5847	-85.4117	144	ZY1E	20220327	2022-03-27 16:51:14	2022-03-27 16:51:14	KY	EST	2022-03-27 11:51:14	6071	03/27/2022	11:51	412.9	409.2	371.723	290.923	0.217367	56.8828	19.7493	37.1335	6.89861	4.57908	111.436	134.466	3.62	-1	0	0.0470625
134	ZY1E_AHSI_W91.94_N34.40_20220726_015044_L1A0000481359	White Bluff_20220726	White Bluff	electricity	34.4236	-92.1392	93	ZY1E	20220726	2022-07-26 17:12:13	2022-07-26 17:12:13	AR	CST	2022-07-26 11:12:13	6009	07/26/2022	11:12	1389.4	1742.2	1324.45	957.05	0.2774	168.93	33.7899	135.14	13.9936	6.52915	162.228	176.288	3.26	-1	0.7	0.0465062	微弱的排放
135	ZY1E_AHSI_W92.11_N34.40_20220113_012261_L1A0000391521	White Bluff_20220113	White Bluff	electricity	34.4236	-92.1392	93	ZY1E	20220113	2022-01-13 17:14:27	2022-01-13 17:14:27	AR	CST	2022-01-13 11:14:27	6009	01/13/2022	11:14	901.3	897.1	816.757	498.995	0.389052	125.085	20.5814	104.504	11.6792	8.62742	119.944	91.1574	2.28	-1	0.7	0.0509625	没有排放
136	ZY1E_AHSI_W92.15_N34.40_20220309_013050_L1A0000416988	White Bluff_20220309	White Bluff	electricity	34.4236	-92.1392	93	ZY1E	20220309	2022-03-09 17:14:19	2022-03-09 17:14:19	AR	CST	2022-03-09 11:14:19	6009	03/09/2022	11:14	280.3	279.1	254.03	1337.95	4.26691	245.318	26.642	218.676	10.729	10.1452	67.8404	63.9961	2.83	-1	0.5	0.0207437	很多云，不适合反演
137	ZY1E_AHSI_W92.33_N34.40_20231104_021729_L1A0000674441	White Bluff_20231104	White Bluff	electricity	34.4236	-92.1392	93	ZY1E	20231104	2023-11-04 17:03:42	2023-11-04 17:03:42	AR	CST	2023-11-04 11:03:42	6009	11/04/2023	11:03	537.3	433.2	482.708	499.815	0.0354395	71.8373	18.4879	53.3493	12.4076	5.37124	104.693	30.012	0.86	1	1	0.0518812
138	ZY1F_AHSI_W107.55_N40.59_20231020_009525_L1A0000564874	Craig_20231020	Craig	electricity	40.4627	-107.591	1939	ZY1F	20231020	2023-10-20 18:26:24	2023-10-20 18:26:24	CO	MST	2023-10-20 11:26:24	6021	10/20/2023	11:26	729.3	742.5	666.799	120.964	0.818591	22.8712	10.4389	12.4324	8.71632	3.03636	17.6539	2.47155	0.42	-1	0.5	0.0544688	22有一个羽流 24双羽流0.001
139	ZY1F_AHSI_W86.57_N36.17_20230305_006234_L1A0000379047	Gallatin_20230305	Gallatin	electricity	36.3156	-86.4006	140	ZY1F	20230305	2023-03-05 16:54:32	2023-03-05 16:54:32	TN	CST	2023-03-05 10:54:32	3403	03/05/2023	10:54	278.3	276	250.592	329.239	0.313846	76.5298	14.7334	61.7964	6.22066	3.41463	132.656	110.547	2.5	-1	0	0.0280437	无排放
140	ZY1F_AHSI_W101.04_N41.04_20230916_009032_L1A0000537816	Gerald Gentleman Station_20230916	Gerald Gentleman Station	electricity	41.0808	-101.141	948	ZY1F	20230916	2023-09-16 18:00:26	2023-09-16 18:00:26	NE	CST	2023-09-16 12:00:26	6077	09/16/2023	12:00	1330.8	1109.2	1207.28	1475.34	0.222033	192.871	19.381	173.49	6.82273	15.5633	26.5828	35.0893	3.96	1	1	0.034175
141	ZY1F_AHSI_W101.05_N41.04_20231110_009821_L1A0000582861	Gerald Gentleman Station_20231110	Gerald Gentleman Station	electricity	41.0808	-101.141	948	ZY1F	20231110	2023-11-10 18:01:07	2023-11-10 18:01:07	NE	CST	2023-11-10 12:01:07	6077	11/10/2023	12:01	1304.1	1307.4	1183.11	1016.97	0.140427	112.927	12.6135	100.313	3.9421	6.02035	83.0996	135.175	4.88	-1	0.7	0.0268812
142	ZY1F_AHSI_W101.48_N41.04_20230624_007827_L1A0000469131	Gerald Gentleman Station_20230624	Gerald Gentleman Station	electricity	41.0808	-101.141	948	ZY1F	20230624	2023-06-24 18:00:53	2023-06-24 18:00:53	NE	CST	2023-06-24 12:00:53	6077	06/24/2023	12:00	688	687.2	624.143	634.445	0.0165061	63.647	17.8819	45.7651	5.75179	38.8239	34.456	87.2886	7.6	1	1	0.0373313	10波段效果好
143	ZY1F_AHSI_W80.08_N39.27_20220621_002553_L1A0000190867	Harrison Power Station_20220621	Harrison Power Station	electricity	39.3844	-80.3325	299	ZY1F	20220621	2022-06-21 16:24:44	2022-06-21 16:24:44	WV	EST	2022-06-21 11:24:44	3944	06/21/2022	11:24	1900.6	2008.4	1763.31	1576.57	0.105907	340.418	18.8267	321.591	8.6008	13.7901	25.0176	19.4303	2.33	1	1	0.046025	非常清晰
144	ZY1F_AHSI_W80.61_N39.27_20230418_006865_L1A0000414746	Harrison Power Station_20230418	Harrison Power Station	electricity	39.3844	-80.3325	299	ZY1F	20230418	2023-04-18 16:34:27	2023-04-18 16:34:27	WV	EST	2023-04-18 11:34:27	3944	04/18/2023	11:34	631.6	618	565.987	700.163	0.237067	79.5522	18.4282	61.124	5.30037	6.53356	169.114	323.007	5.73	1	1	0.0325312
145	ZY1F_AHSI_W110.71_N39.27_20230817_008602_L1A0000512937	Hunter_20230817	Hunter	electricity	39.1747	-111.029	1725	ZY1F	20230817	2023-08-17 18:36:51	2023-08-17 18:36:51	UT	MST	2023-08-17 11:36:51	6165	08/17/2023	11:36	654	651.7	592.047	870.733	0.470716	214.743	7.48141	207.261	4.35271	15.5746	123.853	85.0454	2.06	1	1	0.0088375
146	ZY1F_AHSI_W110.73_N39.27_20230623_007813_L1A0000468861	Hunter_20230623	Hunter	electricity	39.1747	-111.029	1725	ZY1F	20230623	2023-06-23 18:36:03	2023-06-23 18:36:03	UT	MST	2023-06-23 11:36:03	6165	06/23/2023	11:36	422.6	419.8	381.852	589.342	0.543377	64.0257	15.3328	48.6929	4.90173	3.84706	53.9514	111.32	6.19	-1	0.7	0.0267812	有点不像
147	ZY1F_AHSI_W111.15_N39.27_20230719_008186_L1A0000490264	Hunter_20230719	Hunter	electricity	39.1747	-111.029	1725	ZY1F	20230719	2023-07-19 18:38:10	2023-07-19 18:38:10	UT	MST	2023-07-19 11:38:10	6165	07/19/2023	11:38	656.412	749.552	649.001	535.23	0.175301	60.9437	5.51476	55.4289	4.51397	18.8933	60.6186	10.1031	0.5	1	1	0.0084	清晰完美
148	ZY1F_AHSI_W98.47_N29.51_20221013_004183_L1A0000250381	J K Spruce_20221013	J K Spruce	electricity	29.3091	-98.3205	149	ZY1F	20221013	2022-10-13 17:33:02	2022-10-13 17:33:02	TX	CST	2022-10-13 11:33:02	7097	10/13/2022	11:33	1492.3	1495.9	1355.59	1128.33	0.167644	116.83	18.7003	98.1298	5.08199	7.99581	166.203	319.109	5.76	1	1	0.0246375	噪声较大
149	ZY1F_AHSI_W94.55_N38.38_20220920_003853_L1A0000229994	La Cygne_20220920	La Cygne	electricity	38.3472	-94.6467	263	ZY1F	20220920	2022-09-20 17:24:31	2022-09-20 17:24:31	KS	CST	2022-09-20 11:24:31	1241	09/20/2022	11:24	759.1	765.6	691.003	774.733	0.121173	96.9064	22.0552	74.8512	6.67484	4.93149	129.19	215.748	5.01	-1	0.7	0.0315812	水汽影响太大了
150	ZY1F_AHSI_W94.56_N38.38_20230816_008587_L1A0000512042	La Cygne_20230816	La Cygne	electricity	38.3472	-94.6467	263	ZY1F	20230816	2023-08-16 17:31:23	2023-08-16 17:31:23	KS	CST	2023-08-16 11:31:23	1241	08/16/2023	11:31	1273.7	1441.1	1233.94	1040.3	0.156927	190.436	18.4404	171.996	7.70278	14.7593	136.528	127.426	2.8	1	1	0.048675	飘到湖面上了
151	ZY1F_AHSI_W94.58_N38.38_20230108_005431_L1A0000329362	La Cygne_20230108	La Cygne	electricity	38.3472	-94.6467	263	ZY1F	20230108	2023-01-08 17:27:27	2023-01-08 17:27:27	KS	CST	2023-01-08 11:27:27	1241	01/08/2023	11:27	1406.5	1398.2	1272.57	1074.88	0.155342	127.57	10.0832	117.487	6.45968	5.23319	27.3646	10.9459	1.2	1	1	0.0195563	噪声较大
152	ZY1F_AHSI_W90.79_N38.83_20230704_007970_L1A0000476992	Labadie_20230704	Labadie	electricity	38.5583	-90.8361	146	ZY1F	20230704	2023-07-04 17:16:01	2023-07-04 17:16:01	MO	CST	2023-07-04 11:16:01	2103	07/04/2023	11:16	2560.7	2558.1	2322.4	2827.86	0.217644	579.329	25.2962	554.033	10.9846	17.0258	113.61	91.267	2.41	1	1	0.0224312	构成羽流，有排放
153	ZY1F_AHSI_W90.93_N38.38_20231022_009549_L1A0000565683	Labadie_20231022	Labadie	electricity	38.5583	-90.8361	146	ZY1F	20231022	2023-10-22 17:17:43	2023-10-22 17:17:43	MO	CST	2023-10-22 11:17:43	2103	10/22/2023	11:17	2197.7	2194	1992.77	1770.52	0.111526	221.658	20.3662	201.292	10.3641	6.37567	100.011	64.007	1.92	-1	0.7	0.052475	受江水影响较大
154	ZY1F_AHSI_W104.83_N41.92_20230930_009233_L1A0000549577	Laramie River_20230930	Laramie River	electricity	42.1103	-104.883	1393	ZY1F	20230930	2023-09-30 18:16:43	2023-09-30 18:16:43	WY	MST	2023-09-30 11:16:43	6204	09/30/2023	11:16	798.9	661.1	691.414	834.797	0.207376	127.579	14.4659	113.113	5.60189	6.63395	15.3476	17.3939	3.4	-1	0.7	0.0519437	有羽流
155	ZY1F_AHSI_W94.55_N32.17_20231210_010251_L1A0000608285	Martin Lake_20231210	Martin Lake	electricity	32.2597	-94.5703	98	ZY1F	20231210	2023-12-10 17:27:08	2023-12-10 17:27:08	TX	CST	2023-12-10 11:27:08	6146	12/10/2023	11:27	1027.6	1026.4	931.733	1098.6	0.179094	134.321	24.3333	109.987	7.51168	8.10665	110.241	176.019	4.79	1	1	0.0413562	有羽流
156	ZY1F_AHSI_W94.57_N32.17_20220802_003150_L1A0000184740	Martin Lake_20220802	Martin Lake	electricity	32.2597	-94.5703	98	ZY1F	20220802	2022-08-02 17:17:29	2022-08-02 17:17:29	TX	CST	2022-08-02 11:17:29	6146	08/02/2022	11:17	2263.6	2623.6	2146.04	2385.03	0.111363	352.866	28.7752	324.091	10.633	9.10915	128.636	145.359	3.39	-1	0.7	0.0468688	有排放，圆形，堆叠状，飘到湖面上
157	ZY1F_AHSI_W94.61_N32.17_20221120_004728_L1A0000290523	Martin Lake_20221120	Martin Lake	electricity	32.2597	-94.5703	98	ZY1F	20221120	2022-11-20 17:20:45	2022-11-20 17:20:45	TX	CST	2022-11-20 11:20:45	6146	11/20/2022	11:20	2635.2	2664.4	2399.44	2926.62	0.21971	479.706	25.2735	454.432	10.6008	7.91849	161.859	160.241	2.97	1	1	0.0447875	有一点羽流比较稀疏
158	ZY1F_AHSI_W96.64_N31.29_20220727_003064_L1A0000178119	Oak Grove_20220727	Oak Grove	electricity	31.185	-96.4853	129	ZY1F	20220727	2022-07-27 17:24:51	2022-07-27 17:24:51	TX	CST	2022-07-27 11:24:51	6180	07/27/2022	11:24	1241	1493.7	1217.51	1679.18	0.379186	223.323	17.8939	205.429	5.88456	10.9634	8.60896	10.876	3.79	-1	0.7	0.0293937
159	ZY1F_AHSI_W96.65_N31.29_20230304_006220_L1A0000378222	Oak Grove_20230304	Oak Grove	electricity	31.185	-96.4853	129	ZY1F	20230304	2023-03-04 17:30:35	2023-03-04 17:30:35	TX	CST	2023-03-04 11:30:35	6180	03/04/2023	11:30	650.4	654.3	591.802	617.352	0.0431729	91.2692	15.9243	75.3449	5.50325	8.11752	27.2719	34.5444	3.8	-1	0.7	0.0306125	被云挡住了
160	ZY1F_AHSI_W96.65_N31.29_20230816_008587_L1A0000512058	Oak Grove_20230816	Oak Grove	electricity	31.185	-96.4853	129	ZY1F	20230816	2023-08-16 17:33:23	2023-08-16 17:33:23	TX	CST	2023-08-16 11:33:23	6180	08/16/2023	11:33	1820.5	1806.6	1644.59	2517.5	0.53077	467.004	15.2119	451.793	5.89359	22.0618	1.68558	1.46084	2.6	1	1	0.026525	羽流很好，简直完美！！！适合作为案例
161	ZY1F_AHSI_W96.67_N31.29_20230108_005431_L1A0000329378	Oak Grove_20230108	Oak Grove	electricity	31.185	-96.4853	129	ZY1F	20230108	2023-01-08 17:29:27	2023-01-08 17:29:27	TX	CST	2023-01-08 11:29:27	6180	01/08/2023	11:29	1957.3	1974.5	1783.17	1274.53	0.285244	153.074	16.2558	136.818	5.11732	8.87919	6.04954	8.87266	4.4	1	1	0.0279063	有羽流，水池下方有一个点源
162	ZY1F_AHSI_W97.01_N29.95_20230304_006220_L1A0000378225	Sam Seymour_20230304	Sam Seymour	electricity	29.9172	-96.7506	115	ZY1F	20230304	2023-03-04 17:30:57	2023-03-04 17:30:57	TX	CST	2023-03-04 11:30:57	6179	03/04/2023	11:30	672.8	881.2	704.883	1288.34	0.827738	213.592	16.3159	197.276	6.18047	8.39572	19.5928	19.6581	3.01	1	1	0.0215375
163	ZY1F_AHSI_W97.01_N29.95_20230816_008587_L1A0000512061	Sam Seymour_20230816	Sam Seymour	electricity	29.9172	-96.7506	115	ZY1F	20230816	2023-08-16 17:33:45	2023-08-16 17:33:45	TX	CST	2023-08-16 11:33:45	6179	08/16/2023	11:33	1354.8	1363.7	1233.49	1482	0.201465	308.011	11.8241	296.187	4.92906	10.5916	5.87723	4.64301	2.37	1	1	0.0271125
164	ZY1F_AHSI_W88.63_N37.05_20231031_009677_L1A0000574307	Shawnee_20231031	Shawnee	electricity	37.1517	-88.775	105	ZY1F	20231031	2023-10-31 17:07:20	2023-10-31 17:07:20	KY	CST	2023-10-31 11:07:20	1379	10/31/2023	11:07	879.1	888.799	798.533	532.545	0.333095	92.35	24.0218	68.3283	8.23313	3.78432	97.4388	116.927	3.6	-1	0.5	0.0618688	羽流飘到了水面上，水汽干扰大
165	ZY1F_AHSI_W93.93_N45.45_20220721_002978_L1A0000173921	Sherburne County_20220721	Sherburne County	electricity	45.3792	-93.8958	292	ZY1F	20220721	2022-07-21 17:27:56	2022-07-21 17:27:56	MN	CST	2022-07-21 11:27:56	6090	07/21/2022	11:27	2400.9	2419.9	2185.82	2341.37	0.0711671	231.979	31.8494	200.13	8.97732	11.7518	4.39687	8.64718	5.9	1	1	0.0379	适合作为反演案例

## Sheet: 2025.1
id	filename	foldername	facility	type	Latitude	Longitude	Altitude	satellite	date	Time of Satellite	UTC	State	Zone	Local Standard Time	Facility ID	day LST	time	前整点Q	后整点Q	avg Q(ton/h)	反演结果	反演误差	不确定度	IME_u (t/h)	Wind_u (t/h)	MF_u (ppm)	q	diff_dir	phi	风速	提取	排放	背景	备注
1	GF5_AHSI_W107.84_N40.19_20190803_006569_L10000052859	Craig_20190802	Craig	electricity	40.4627	-107.591	1939	GF5	20190803	2019-08-03 04:08:09	2019-08-02 20:08:09	CO	MST	2019-08-02 13:08:09	6021	08/02/2019	13:08	1356.3	1381	1233.4	1442.36	0.169415	231.192	34.8695	196.323	16.8162	8.53903	1.00418	1.0912	3.26	-1	0.7	0.0762875
2	GF5_AHSI_W111.09_N39.21_20191118_008126_L10000065664	Hunter_20191118	Hunter	electricity	39.1747	-111.029	1725	GF5	20191118	2019-11-18 04:20:29	2019-11-17 20:20:29	UT	MST	2019-11-17 13:20:29	6165	11/17/2019	13:20	889	885.7	805.489	867.189	0.0765995	88.6802	11.0771	77.603	9.07213	4.68331	160.343	48.6375	0.91	-1	0.5	0.0379813
3	GF5_AHSI_W85.14_N38.72_20191225_008664_L10000068784	Trimble County_20191225	Trimble County	electricity	38.5847	-85.4117	144	GF5	20191225	2019-12-25 02:36:43	2019-12-24 18:36:43	KY	EST	2019-12-24 13:36:43	6071	12/24/2019	13:36	1037.4	1080.8	964.737	866.81	0.101506	91.4612	12.6408	78.8204	8.57702	6.46667	76.5812	27.0587	1.06	1	1	0.0293375
4	GF5A_AHSI_W101.6_N47.5_20240823_009093_L10000162368	Antelope Valley_20240823	Antelope Valley	electricity	47.3714	-101.834	590	GF5A	20240823	2024-08-23 19:29:30	2024-08-23 19:29:30	ND	CST	2024-08-23 13:29:30	6469	08/23/2024	13:29	988.6	878.5	848.567	593.326	0.300791	93.2291	46.0402	47.1889	14.3295	5.08699	137.522	288.339	6.29	1	0.5	0.0573063
5	GF5A_AHSI_W102.1_N47.6_20240830_009196_L10000164953	Antelope Valley_20240830	Antelope Valley	electricity	47.3714	-101.834	590	GF5A	20240830	2024-08-30 19:31:07	2024-08-30 19:31:07	ND	CST	2024-08-30 13:31:07	6469	08/30/2024	13:31	538	546.6	492.096	693.602	0.409485	107.446	35.3	72.1457	12.0011	3.67416	173.639	254.67	4.4	-1	0.5	0.0449375
6	GF5A_AHSI_W107.6_N40.7_20231206_005292_L10000072037	Craig_20231206	Craig	electricity	40.4627	-107.591	1939	GF5A	20231206	2023-12-06 20:05:46	2023-12-06 20:05:46	CO	MST	2023-12-06 13:05:46	6021	12/06/2023	13:05	892.1	893.5	809.405	812.53	0.00386036	91.1787	18.3868	72.7919	14.9327	4.10681	40.0655	12.2868	0.92	-1	0.7	0.0438375
7	GF5A_AHSI_W107.6_N40.7_20240606_007957_L10000134130	Craig_20240606	Craig	electricity	40.4627	-107.591	1939	GF5A	20240606	2024-06-06 20:02:05	2024-06-06 20:02:05	CO	MST	2024-06-06 13:02:05	6021	06/06/2024	13:02	497.9	547.3	453.181	486.348	0.0731865	58.6459	13.1661	45.4798	8.86614	7.02238	163.287	73.4791	1.35	-1	0.7	0.0434312
8	GF5A_AHSI_W107.8_N40.2_20230916_004111_L10000052906	Craig_20230916	Craig	electricity	40.4627	-107.591	1939	GF5A	20230916	2023-09-16 20:09:27	2023-09-16 20:09:27	CO	MST	2023-09-16 13:09:27	6021	09/16/2023	13:09	962.5	957.4	872.471	1106.22	0.267917	248.348	22.2922	226.056	13.8098	4.6119	120.903	90.2744	2.24	-1	0.7	0.0356901
9	GF5A_AHSI_W107.8_N40.2_20240613_008059_L10000136449	Craig_20240613	Craig	electricity	40.4627	-107.591	1939	GF5A	20240613	2024-06-13 20:03:23	2024-06-13 20:03:23	CO	MST	2024-06-13 13:03:23	6021	06/13/2024	13:03	1002.9	1051.9	912.038	1088.11	0.193049	155.023	32.3243	122.699	14.4225	11.5844	114.5	152.667	4	-1	0.7	0.0439935
10	GF5A_AHSI_W108.6_N36.7_20231227_005597_L10000078715	Four Corners Steam Elec Station_20231227	Four Corners Steam Elec Station	electricity	36.69	-108.481	1630	GF5A	20231227	2023-12-27 20:12:59	2023-12-27 20:12:59	NM	MST	2023-12-27 13:12:59	2442	12/27/2023	13:12	797	796.8	722.99	564.911	0.218646	74.7424	15.761	58.9814	6.24215	3.5126	137.839	201.245	4.38	-1	0.7	0.063725
11	GF5A_AHSI_W108.5_N36.7_20240711_008467_L10000146576	Four Corners Steam Elec Station_20240711	Four Corners Steam Elec Station	electricity	36.69	-108.481	1630	GF5A	20240711	2024-07-11 20:09:06	2024-07-11 20:09:06	NM	MST	2024-07-11 13:09:06	2442	07/11/2024	13:09	1414.9	1415.2	1283.62	1452.54	0.131603	169.649	15.9469	153.702	6.25135	7.76358	95.5417	137.262	4.31	-1	0.7	0.0750688
12	GF5A_AHSI_W108.8_N36.7_20240407_007083_L10000113789	Four Corners Steam Elec Station_20240407	Four Corners Steam Elec Station	electricity	36.69	-108.481	1630	GF5A	20240407	2024-04-07 20:11:50	2024-04-07 20:11:50	NM	MST	2024-04-07 13:11:50	2442	04/07/2024	13:11	1033.2	1037.1	937.952	932.64	0.00566366	131.021	11.4322	119.589	4.95653	7.45664	41.9551	48.5281	3.47	1	1	0.04855
13	GF5A_AHSI_W100.9_N41.2_20230913_004068_L10000052333	Gerald Gentleman Station_20230913	Gerald Gentleman Station	electricity	41.0808	-101.141	948	GF5A	20230913	2023-09-13 19:40:39	2023-09-13 19:40:39	NE	CST	2023-09-13 13:40:39	6077	09/13/2023	13:40	1345.6	1339.6	1217.08	1418.35	0.165372	161.612	17.5578	144.054	6.18529	6.49617	131.893	199.159	4.53	1	1	0.0320312
14	GF5A_AHSI_W100.9_N41.2_20240610_008016_L10000135380	Gerald Gentleman Station_20240610	Gerald Gentleman Station	electricity	41.0808	-101.141	948	GF5A	20240610	2024-06-10 19:34:47	2024-06-10 19:34:47	NE	CST	2024-06-10 13:34:47	6077	06/10/2024	13:34	682.9	683.8	619.979	1029.38	0.660352	118.484	49.8136	68.6709	15.1211	10.9217	86.9803	240.646	8.3	-1	0.5	0.0355375
15	GF5A_AHSI_W101.1_N41.2_20240229_006530_L10000101560	Gerald Gentleman Station_20240229	Gerald Gentleman Station	electricity	41.0808	-101.141	948	GF5A	20240229	2024-02-29 19:37:26	2024-02-29 19:37:26	NE	CST	2024-02-29 13:37:26	6077	02/29/2024	13:37	236	237.4	214.879	274.908	0.279363	39.2755	10.1294	29.1462	3.69524	4.0914	6.0771	8.7105	4.3	-1	0.7	0.0833813
16	GF5A_AHSI_W101.2_N41.2_20240927_009603_L10000174913	Gerald Gentleman Station_20240927	Gerald Gentleman Station	electricity	41.0808	-101.141	948	GF5A	20240927	2024-09-27 19:34:25	2024-09-27 19:34:25	NE	CST	2024-09-27 13:34:25	6077	09/27/2024	13:34	1344	1343.3	1218.9	1251.74	0.0269482	221.254	11.1708	210.083	5.82703	6.94677	30.3649	26.9235	2.66	1	1	0.0659062
17	GF5A_AHSI_W101.4_N35.3_20231018_004577_L10000059390	Harrington Station_20231018	Harrington Station	electricity	35.2972	-101.748	1090	GF5A	20231018	2023-10-18 19:47:26	2023-10-18 19:47:26	TX	CST	2023-10-18 13:47:26	6193	10/18/2023	13:47	153	145.45	133.434	249.161	0.867296	28.8382	11.062	17.7761	3.36537	4.21862	176.839	437.97	7.43	-1	0	0.0384437
18	GF5A_AHSI_W101.6_N35.3_20240411_007143_L10000114980	Harrington Station_20240411	Harrington Station	electricity	35.2972	-101.748	1090	GF5A	20240411	2024-04-11 19:44:10	2024-04-11 19:44:10	TX	CST	2024-04-11 13:44:10	6193	04/11/2024	13:44	635.1	519.6	499.314	401.218	0.196462	36.8873	4.54595	32.3413	3.70917	6.27586	114.976	5.36553	0.14	-1	0.7	0.0495437
19	GF5A_AHSI_W101.7_N35.3_20230328_001612_L10000019840	Harrington Station_20230328	Harrington Station	electricity	35.2972	-101.748	1090	GF5A	20230328	2023-03-28 19:54:51	2023-03-28 19:54:51	TX	CST	2023-03-28 13:54:51	6193	03/28/2023	13:54	482.6	483.5	438.542	624.278	0.42353	65.1036	5.45944	59.6441	3.26429	4.61273	5.25312	2.80166	1.6	1	1	0.0283312
20	GF5A_AHSI_W101.7_N35.3_20240213_006298_L10000094521	Harrington Station_20240213	Harrington Station	electricity	35.2972	-101.748	1090	GF5A	20240213	2024-02-13 19:45:52	2024-02-13 19:45:52	TX	CST	2024-02-13 13:45:52	6193	02/13/2024	13:45	324.6	326.6	295.833	176.766	0.402481	31.669	7.96111	23.7079	3.6404	4.12972	167.414	184.713	3.31	-1	0.7	0.0484812
21	GF5A_AHSI_W101.9_N35.3_20230904_003936_L10000050446	Harrington Station_20230904	Harrington Station	electricity	35.2972	-101.748	1090	GF5A	20230904	2023-09-04 19:50:29	2023-09-04 19:50:29	TX	CST	2023-09-04 13:50:29	6193	09/04/2023	13:50	760.5	701.1	645.008	498.187	0.227627	52.219	17.5896	34.6294	5.06564	4.67825	2.37178	6.12709	7.75	1	1	0.05045
22	GF5A_AHSI_W80.0_N39.2_20240312_006703_L10000103880	Harrison Power Station_20240312	Harrison Power Station	electricity	39.3844	-80.3325	299	GF5A	20240312	2024-03-12 18:14:51	2024-03-12 18:14:51	WV	EST	2024-03-12 13:14:51	3944	03/12/2024	13:14	1069.7	1073.1	971.135	1058.76	0.0902305	133.695	21.2249	112.47	7.93278	6.79152	108.609	155.311	4.29	-1	0.7	0.0412125
23	GF5A_AHSI_W80.1_N39.2_20231115_004984_L10000065474	Harrison Power Station_20231115	Harrison Power Station	electricity	39.3844	-80.3325	299	GF5A	20231115	2023-11-15 18:17:57	2023-11-15 18:17:57	WV	EST	2023-11-15 13:17:57	3944	11/15/2023	13:17	1970.3	1977.4	1789.25	1518.12	0.151531	195.677	22.9805	172.696	9.00685	5.51824	152.61	201.445	3.96	-1	0.7	0.0430625
24	GF5A_AHSI_W80.4_N39.2_20240319_006805_L10000106623	Harrison Power Station_20240319	Harrison Power Station	electricity	39.3844	-80.3325	299	GF5A	20240319	2024-03-19 18:16:18	2024-03-19 18:16:18	WV	EST	2024-03-19 13:16:18	3944	03/19/2024	13:16	1116	1043	994.758	869.14	0.12628	96.8088	22.3754	74.4333	6.78806	4.20272	41.7708	78.8076	5.66	-1	0.7	0.0414812
25	GF5A_AHSI_W80.5_N39.2_20230819_003702_L10000047101	Harrison Power Station_20230819	Harrison Power Station	electricity	39.3844	-80.3325	299	GF5A	20230819	2023-08-19 18:21:53	2023-08-19 18:21:53	WV	EST	2023-08-19 13:21:53	3944	08/19/2023	13:21	1369.6	1357.3	1238.57	1501.82	0.212539	155.112	15.3134	139.799	9.24066	9.94416	4.08119	1.76852	1.3	1	1	0.0481688
26	GF5A_AHSI_W111.2_N39.2_20240928_009618_L10000175260	Hunter_20240928	Hunter	electricity	39.1747	-111.029	1725	GF5A	20240928	2024-09-28 20:16:35	2024-09-28 20:16:35	UT	MST	2024-09-28 13:16:35	6165	09/28/2024	13:16	538.7	545.3	490.297	411.026	0.161679	54.0921	14.7903	39.3018	9.71988	3.71266	148.89	79.9042	1.61	1	1	0.007
27	GF5A_AHSI_W98.5_N29.3_20230814_003630_L10000044804	J K Spruce_20230814	J K Spruce	electricity	29.3091	-98.3205	149	GF5A	20230814	2023-08-14 19:42:15	2023-08-14 19:42:15	TX	CST	2023-08-14 13:42:15	7097	08/14/2023	13:42	1389.2	1408.7	1272.64	1247.09	0.0200792	131.644	11.5416	120.103	5.90463	13.0267	24.606	13.9434	1.7	1	1	0.022475	完美
28	GF5A_AHSI_W98.0_N29.3_20230920_004169_L10000053680	J K Spruce_20230920	J K Spruce	electricity	29.3091	-98.3205	149	GF5A	20230920	2023-09-20 19:39:18	2023-09-20 19:39:18	TX	CST	2023-09-20 13:39:18	7097	09/20/2023	13:39	1303	1302.6	1181.83	1305.18	0.104374	201.492	12.3514	189.141	5.21595	11.3123	11.6499	11.8829	3.06	1	1	0.0139
29	GF5A_AHSI_W98.5_N29.3_20231217_005451_L10000075253	J K Spruce_20231217	J K Spruce	electricity	29.3091	-98.3205	149	GF5A	20231217	2023-12-17 19:38:50	2023-12-17 19:38:50	TX	CST	2023-12-17 13:38:50	7097	12/17/2023	13:38	556.7	558	505.777	544.717	0.076991	105.292	12.3423	92.95	5.44311	5.4731	69.7214	60.89	2.62	-1	0.7	0.0272312
30	GF5A_AHSI_W108.7_N41.7_20231213_005393_L10000074107	Jim Bridger_20231213	Jim Bridger	electricity	41.7378	-108.787	2044	GF5A	20231213	2023-12-13 20:08:54	2023-12-13 20:08:54	WY	MST	2023-12-13 13:08:54	8066	12/13/2023	13:08	1825.9	1677	1638.42	731.834	0.553329	109.438	26.9135	82.5245	12.3746	4.24097	89.5278	119.37	4	1	1	0.0471125
31	GF5A_AHSI_W108.8_N41.7_20230923_004213_L10000054221	Jim Bridger_20230923	Jim Bridger	electricity	41.7378	-108.787	2044	GF5A	20230923	2023-09-23 20:11:46	2023-09-23 20:11:46	WY	MST	2023-09-23 13:11:46	8066	09/23/2023	13:11	460.9	452.2	416.674	166.808	0.599668	25.2845	13.0373	12.2472	4.34858	3.58401	29.0041	68.643	7.1	-1	0	0.0335937
32	GF5A_AHSI_W108.6_N41.7_20240803_008802_L10000154428	Jim Bridger_20240803	Jim Bridger	electricity	41.7378	-108.787	2044	GF5A	20240803	2024-08-03 20:04:32	2024-08-03 20:04:32	WY	MST	2024-08-03 13:04:32	8066	08/03/2024	13:04	1441.8	1634.1	1319.61	602.329	0.543555	76.3075	12.0721	64.2354	5.13308	6.20308	60.3414	85.8859	4.27	-1	0.7	0.0390187
33	GF5A_AHSI_W94.7_N38.2_20231008_004431_L10000057166	La Cygne_20231008	La Cygne	electricity	38.3472	-94.6467	263	GF5A	20231008	2023-10-08 19:17:58	2023-10-08 19:17:58	KS	CST	2023-10-08 13:17:58	1241	10/08/2023	13:17	654.4	647.1	591.785	712.576	0.204112	107.715	14.5677	93.1475	6.10086	5.98225	123.505	139.972	3.4	-1	0.7	0.0483437
34	GF5A_AHSI_W94.3_N32.3_20230908_003994_L10000051261	Martin Lake_20230908	Martin Lake	electricity	32.2597	-94.5703	98	GF5A	20230908	2023-09-08 19:22:37	2023-09-08 19:22:37	TX	CST	2023-09-08 13:22:37	6146	09/08/2023	13:22	2712.1	2709.3	2459.44	2696.37	0.096331	372.913	28.1011	344.812	10.3527	11.6799	22.4367	26.0266	3.48	-1	0.7	0.049025	有羽流、但周围水汽干扰也很大
35	GF5A_AHSI_W94.6_N32.3_20240224_006456_L10000098053	Martin Lake_20240224	Martin Lake	electricity	32.2597	-94.5703	98	GF5A	20240224	2024-02-24 19:19:38	2024-02-24 19:19:38	TX	CST	2024-02-24 13:19:38	6146	02/24/2024	13:19	742.7	741.2	673.335	388.558	0.422935	50.7249	12.9035	37.8213	6.24763	4.90738	79.414	48.7072	1.84	-1	0.7	0.0406188
36	GF5A_AHSI_W94.8_N32.3_20240422_007301_L10000118547	Martin Lake_20240422	Martin Lake	electricity	32.2597	-94.5703	98	GF5A	20240422	2024-04-22 19:19:10	2024-04-22 19:19:10	TX	CST	2024-04-22 13:19:10	6146	04/22/2024	13:19	723.8	716.7	654.581	697.457	0.0655012	82.7734	17.9703	64.8031	9.80037	5.09303	84.381	36.0025	1.28	-1	0.7	0.0384437
37	GF5A_AHSI_W94.0_N45.6_20240714_008510_L10000147652	Sherburne County_20240714	Sherburne County	electricity	45.3792	-93.8958	292	GF5A	20240714	2024-07-14 19:02:06	2024-07-14 19:02:06	MN	CST	2024-07-14 13:02:06	6090	07/14/2024	13:02	1646	1631.2	1492.78	976.163	0.346076	207.378	19.8667	187.511	10.0444	8.20767	3.07837	2.42165	2.36	1	1	0.0225125
38	GF5A_AHSI_W85.3_N38.7_20240414_007185_L10000115875	Trimble County_20240414	Trimble County	electricity	38.5847	-85.4117	144	GF5A	20240414	2024-04-14 18:35:41	2024-04-14 18:35:41	KY	EST	2024-04-14 13:35:41	6071	04/14/2024	13:35	1297.4	1354.6	1207.25	1627.57	0.34816	160.372	22.2127	138.159	6.67698	12.3829	18.0856	34.5434	5.73	1	1	0.045275
39	GF5A_AHSI_W92.0_N34.3_20240614_008073_L10000136769	White Bluff_20240614	White Bluff	electricity	34.4236	-92.1392	93	GF5A	20240614	2024-06-14 19:05:28	2024-06-14 19:05:28	AR	CST	2024-06-14 13:05:28	6009	06/14/2024	13:05	927.4	927.3	841.316	740.056	0.120359	90.6851	18.5436	72.1415	9.68779	9.13038	173.421	107.521	1.86	-1	0.7	0.0392125
40	GF5B_AHSI_W101.6_N47.5_20220619_004161_L10000151101	Antelope Valley_20220619	Antelope Valley	electricity	47.371	-101.836	590	GF5B	20220619	2022-06-20 01:51:31	2022-06-19 17:51:31	ND	CST	2022-06-19 11:51:31	6469	06/19/2022	11:51	522.7	565.6	507.266	652.096	0.28551	91.0587	0	0	0	0	0	0	4.53	-1	0.7	0.0848688
41	GF5B_AHSI_W102.0_N47.5_20220316_002777_L10000118963	Antelope Valley_20220316	Antelope Valley	electricity	47.371	-101.836	590	GF5B	20220316	2022-03-17 01:50:55	2022-03-16 17:50:55	ND	CST	2022-03-16 11:50:55	6469	03/16/2022	11:50	560.6	524.1	480.974	1073.45	1.23183	110.344	0	0	0	0	0	0	9.18	-1	0	0.0401063
42	GF5B_AHSI_W102.1_N47.5_20220626_004263_L10000154923	Antelope Valley_20220626	Antelope Valley	electricity	47.371	-101.836	590	GF5B	20220626	2022-06-27 01:53:27	2022-06-26 17:53:27	ND	CST	2022-06-26 11:53:27	6469	06/26/2022	11:53	667	827.8	733.949	576.163	0.214981	86.6229	42.2139	44.409	12.5443	4.20348	9.99462	21.9548	6.59	1	1	0.0692062	能看见一点
43	GF5B_AHSI_W102.0_N47.5_20230130_007439_L10000282305	Antelope Valley_20230130	Antelope Valley	electricity	47.3714	-101.834	590	GF5B	20230130	2023-01-31 01:57:28	2023-01-30 17:57:28	ND	CST	2023-01-30 11:57:28	6469	01/30/2023	11:57	1034.6	1033.4	937.539	1176.19	0.254546	188.013	67.4684	120.544	25.6654	3.54035	163.538	244.216	4.48	-1	0.5	0.0676563
44	GF5B_AHSI_W102.1_N47.5_20240623_014869_L10000537123	Antelope Valley_20240623	Antelope Valley	electricity	47.3714	-101.834	590	GF5B	20240623	2024-06-24 01:57:48	2024-06-23 17:57:48	ND	CST	2024-06-23 11:57:48	6469	06/23/2024	11:57	1055.5	1045.9	949.26	1025.82	0.0806475	234.335	29.1066	205.228	14.6558	6.11031	117.537	89.3283	2.28	-1	0.7	0.0827937
45	GF5B_AHSI_W107.5_N40.2_20230926_010921_L10000396892	Craig_20230926	Craig	electricity	40.4627	-107.591	1939	GF5B	20230926	2023-09-27 02:12:39	2023-09-26 18:12:39	CO	MST	2023-09-26 11:12:39	6021	09/26/2023	11:12	761.2	909.1	717.384	993.727	0.385211	102.958	12.227	90.7309	8.56715	7.36248	16.0703	5.89245	1.1	-1	0.7	0.05215
46	GF5B_AHSI_W107.8_N40.7_20221018_005924_L10000222668	Craig_20221018	Craig	electricity	40.4627	-107.591	1939	GF5B	20221018	2022-10-19 02:11:02	2022-10-18 18:11:02	CO	MST	2022-10-18 11:11:02	6021	10/18/2022	11:11	830.6	831.6	753.674	974.473	0.292964	103.92	10.5916	93.3285	7.11936	6.2139	3.98094	2.16298	1.63	1	1	0.0565375	两个源
47	GF5B_AHSI_W107.6_N40.7_20240113_012509_L10000452553	Craig_20240113	Craig	electricity	40.4627	-107.591	1939	GF5B	20240113	2024-01-14 02:13:26	2024-01-13 18:13:26	CO	MST	2024-01-13 11:13:26	6021	01/13/2024	11:13	1143.7	1144.1	1037.63	816.913	0.212709	207.371	24.4946	182.877	16.9289	7.11332	142.891	99.0712	2.08	-1	0.7	0.0431313
48	GF5B_AHSI_W108.2_N36.7_20220610_004030_L10000145798	Four Corners Steam Elec Station_20220610	Four Corners Steam Elec Station	electricity	36.69	-108.481	1630	GF5B	20220610	2022-06-11 02:06:07	2022-06-10 18:06:07	NM	MST	2022-06-10 11:06:07	2442	06/10/2022	11:06	1471.5	1052.86	1296.94	1229.21	0.0522263	195.375	11.7591	183.616	5.63675	12.1177	0.998694	0.988708	2.97	1	1	0.0724875	完美
49	GF5B_AHSI_W108.3_N36.7_20220420_003287_L10000117219	Four Corners Steam Elec Station_20220420	Four Corners Steam Elec Station	electricity	36.69	-108.481	1630	GF5B	20220420	2022-04-21 02:05:10	2022-04-20 18:05:10	NM	MST	2022-04-20 11:05:10	2442	04/20/2022	11:05	539.3	621.1	495.429	579.839	0.170378	123.292	8.48471	114.807	4.82815	5.58266	162.266	124.404	2.3	1	0.7	0.0774625	有排放
50	GF5B_AHSI_W108.3_N36.7_20240106_012407_L10000448627	Four Corners Steam Elec Station_20240106	Four Corners Steam Elec Station	electricity	36.69	-108.481	1630	GF5B	20240106	2024-01-07 02:12:33	2024-01-06 18:12:33	NM	MST	2024-01-06 11:12:33	2442	01/06/2024	11:12	1357.4	1191	1201.22	1254.26	0.0441534	139.625	22.6554	116.969	15.9322	7.16413	9.27573	4.08132	1.32	-1	0.7	0.0707125
51	GF5B_AHSI_W100.9_N41.2_20220628_004292_L10000156032	Gerald Gentleman Station_20220628	Gerald Gentleman Station	electricity	41.0808	-101.141	948	GF5B	20220628	2022-06-29 01:41:40	2022-06-28 17:41:40	NE	CST	2022-06-28 11:41:40	6077	06/28/2022	11:41	1314.5	1320.1	1195.97	340.877	0.714978	42.0414	8.47811	33.5633	4.79302	17.4102	33.3561	22.2374	2	1	0.5	0.0338313	24波段可见排放，有排放，但是算不准，靠近湖边
52	GF5B_AHSI_W101.1_N41.2_20211220_001524_L10000044164	Gerald Gentleman Station_20211220	Gerald Gentleman Station	electricity	41.0808	-101.141	948	GF5B	20211220	2021-12-21 01:37:21	2021-12-20 17:37:21	NE	CST	2021-12-20 11:37:21	6077	12/20/2021	11:37	1201.3	1283	1135.51	558.423	0.508217	73.3122	11.9271	61.385	4.86762	4.67926	52.4801	72.0727	4.12	1	1	0.0158875
53	GF5B_AHSI_W100.9_N41.2_20220628_004292_L10000156032	Gerald Gentleman Station_20220628	Gerald Gentleman Station	electricity	41.0808	-101.141	948	GF5B	20220628	2022-06-29 01:41:40	2022-06-28 17:41:40	NE	CST	2022-06-28 11:41:40	6077	06/28/2022	11:41	1314.5	1320.1	1195.97	857.22	0.28324	93.0844	8.68113	84.4032	4.79302	17.4102	33.3561	22.2374	2	-1	0.7	0.0338313
54	GF5B_AHSI_W101.9_N35.3_20220424_003345_L10000118254	Harrington Station_20220424	Harrington Station	electricity	35.2972	-101.748	1090	GF5B	20220424	2022-04-25 01:38:35	2022-04-24 17:38:35	TX	CST	2022-04-24 11:38:35	6193	04/24/2022	11:38	296.2	292.8	266.755	335.819	0.258904	37.8916	12.1884	25.7032	3.88651	3.73307	17.6714	39.2305	6.66	-1	0	0.0448812
55	GF5B_AHSI_W101.7_N35.3_20240301_013208_L10000477342	Harrington Station_20240301	Harrington Station	electricity	35.2972	-101.748	1090	GF5B	20240301	2024-03-02 01:44:39	2024-03-01 17:44:39	TX	CST	2024-03-01 11:44:39	6193	03/01/2024	11:44	142.7	143.5	129.987	180.45	0.388207	32.0713	12.6355	19.4358	4.67309	2.72557	126.835	178.414	4.22	-1	0.7	0.043975
56	GF5B_AHSI_W101.9_N35.3_20220424_003345_L10000118254	Harrington Station_20220424	Harrington Station	electricity	35.2972	-101.748	1090	GF5B	20220424	2022-04-25 01:38:35	2022-04-24 17:38:35	TX	CST	2022-04-24 11:38:35	6193	04/24/2022	11:38	296.2	292.8	266.755	335.819	0.258904	37.8916	12.1884	25.7032	3.88651	3.73307	17.6714	39.2305	6.66	-1	0.7	0.0448812
57	GF5B_AHSI_W101.9_N35.3_20240110_012465_L10000450920	Harrington Station_20240110	Harrington Station	electricity	35.2972	-101.748	1090	GF5B	20240110	2024-01-11 01:45:52	2024-01-10 17:45:52	TX	CST	2024-01-10 11:45:52	6193	01/10/2024	11:45	152.9	152.8	138.641	447.78	2.22979	50.4905	17.3135	33.177	5.70755	3.92516	173.211	404.16	7	1	0	0.0435875
58	GF5B_AHSI_W80.4_N39.2_20231012_011153_L10000404427	Harrison Power Station_20231012	Harrison Power Station	electricity	39.3844	-80.3325	299	GF5B	20231012	2023-10-13 00:23:33	2023-10-12 16:23:33	WV	EST	2023-10-12 11:23:33	3944	10/12/2023	11:23	229.9	228.3	208.005	410.606	0.974018	52.0829	16.0948	35.9881	11.2241	8.25406	85.0392	20.6929	0.73	-1	0.5	0.0482375	伪排放
59	GF5B_AHSI_W80.2_N39.2_20240313_013382_L10000483618	Harrison Power Station_20240313	Harrison Power Station	electricity	39.3844	-80.3325	299	GF5B	20240313	2024-03-14 00:22:14	2024-03-13 16:22:14	WV	EST	2024-03-13 11:22:14	3944	03/13/2024	11:22	1067.4	1067.2	968.262	1595.96	0.648269	292.532	15.5337	276.999	7.26946	9.17965	19.6097	16.8644	2.58	1	1	0.063475
60	GF5B_AHSI_W80.4_N39.2_20240122_012639_L10000457433	Harrison Power Station_20240122	Harrison Power Station	electricity	39.3844	-80.3325	299	GF5B	20240122	2024-01-23 00:23:19	2024-01-22 16:23:19	WV	EST	2024-01-22 11:23:19	3944	01/22/2024	11:23	1467.2	1460.1	1328.55	794.509	0.401974	193.934	23.2574	170.676	12.6602	4.88978	158.937	113.905	2.15	-1	0.7	0.059925
61	GF5B_AHSI_W110.9_N39.2_20220418_003258_L10000114473	Hunter_20220418	Hunter	electricity	39.1747	-111.029	1725	GF5B	20220418	2022-04-19 02:17:59	2022-04-18 18:17:59	UT	MST	2022-04-18 11:17:59	6165	04/18/2022	11:17	909.6	899.7	822.631	392.774	0.522538	40.7453	6.87425	33.871	5.24596	8.79682	13.4157	2.68314	0.6	1	-1	0.0246625	低风速
62	GF5B_AHSI_W110.9_N39.2_20240104_012378_L10000447404	Hunter_20240104	Hunter	electricity	39.1747	-111.029	1725	GF5B	20240104	2024-01-05 02:25:25	2024-01-04 18:25:25	UT	MST	2024-01-04 11:25:25	6165	01/04/2024	11:25	353.2	352.6	320.191	571.05	0.783469	60.7356	11.4909	49.2447	9.25425	4.3913	164.418	32.8835	0.6	1	0.7	0.0612625
63	GF5B_AHSI_W98.2_N29.3_20240204_012829_L10000463990	J K Spruce_20240204	J K Spruce	electricity	29.3091	-98.3205	149	GF5B	20240204	2024-02-05 01:25:53	2024-02-04 17:25:53	TX	CST	2024-02-04 11:25:53	7097	02/04/2024	11:25	534.5	536.5	485.646	813.11	0.674284	76.6666	22.3463	54.3203	6.14357	4.08228	14.8908	41.0987	8.28	-1	0.5	0.032375
64	GF5B_AHSI_W98.6_N29.3_20240211_012931_L10000467494	J K Spruce_20240211	J K Spruce	electricity	29.3091	-98.3205	149	GF5B	20240211	2024-02-12 01:27:36	2024-02-11 17:27:36	TX	CST	2024-02-11 11:27:36	7097	02/11/2024	11:27	559.5	524.3	493.2	642.294	0.302299	76.804	22.6856	54.1183	7.4029	4.10638	129.583	250.096	5.79	1	0.5	0.0255125
65	GF5B_AHSI_W108.8_N41.7_20220212_002311_L10000077220	Jim Bridger_20220212	Jim Bridger	electricity	41.7378	-108.787	2044	GF5B	20220212	2022-02-13 02:10:06	2022-02-12 18:10:06	WY	MST	2022-02-12 11:10:06	8066	02/12/2022	11:10	580.1	545	520.951	826.403	0.586335	99.47	14.9281	84.5419	6.11913	7.00465	82.2714	123.133	4.49	1	1	0.0355562	有排放，但周围噪声明显更大，不适合反演
66	GF5B_AHSI_W109.0_N41.6_20231031_011431_L10000413197	Jim Bridger_20231031	Jim Bridger	electricity	41.7378	-108.787	2044	GF5B	20231031	2023-11-01 02:20:04	2023-10-31 18:20:04	WY	MST	2023-10-31 11:20:04	8066	10/31/2023	11:20	1208.8	1174.8	1086.32	991.135	0.0876245	97.1287	15.7854	81.3433	5.68249	5.91724	48.7785	97.7196	6.01	-1	0.7	0.0386625
67	GF5B_AHSI_W109.1_N41.6_20231221_012174_L10000440228	Jim Bridger_20231221	Jim Bridger	electricity	41.7378	-108.787	2044	GF5B	20231221	2023-12-22 02:20:37	2023-12-21 18:20:37	WY	MST	2023-12-21 11:20:37	8066	12/21/2023	11:20	994.7	868	864.063	546.69	0.367304	95.0984	18.8544	76.244	9.8608	4.16843	170.105	180.311	3.18	1	0.7	0.0353
68	GF5B_AHSI_W94.5_N38.2_20221019_005938_L10000223276	La Cygne_20221019	La Cygne	electricity	38.3472	-94.6467	263	GF5B	20221019	2022-10-20 01:15:33	2022-10-19 17:15:33	KS	CST	2022-10-19 11:15:33	1241	10/19/2022	11:15	708.8	713.2	644.01	435.198	0.324238	86.2917	11.4003	74.8914	5.00181	6.30329	160.814	139.372	2.6	-1	0.7	0.062575	32波段可见排放源
69	GF5B_AHSI_W94.3_N32.3_20231103_011474_L10000414550	Martin Lake_20231103	Martin Lake	electricity	32.2597	-94.5703	98	GF5B	20231103	2023-11-04 01:12:54	2023-11-03 17:12:54	TX	CST	2023-11-03 11:12:54	6146	11/03/2023	11:12	1488.1	1487.9	1349.95	938.083	0.305096	200.631	18.6305	182	9.52309	6.62079	43.7369	34.1148	2.34	-1	0.7	0.0438562	有羽流，水面噪声大
70	GF5B_AHSI_W94.5_N32.3_20220407_003097_L10000107611	Martin Lake_20220407	Martin Lake	electricity	32.2597	-94.5703	98	GF5B	20220407	2022-04-08 01:05:50	2022-04-07 17:05:50	TX	CST	2022-04-07 11:05:50	6146	04/07/2022	11:05	1469.4	1514	1336.39	1228.66	0.08061	126.295	27.1674	99.1277	7.74544	6.98061	36	73.92	6.16	-1	0.5	0.04465
71	GF5B_AHSI_W94.3_N32.3_20240404_013703_L10000494997	Martin Lake_20240404	Martin Lake	electricity	32.2597	-94.5703	98	GF5B	20240404	2024-04-05 01:12:16	2024-04-04 17:12:16	TX	CST	2024-04-04 11:12:16	6146	04/04/2024	11:12	1103	1115	1002.8	2158.81	1.15278	312.191	22.6503	289.541	8.67321	11.6365	82.4111	90.927	3.31	1	0	0.0385187
72	GF5B_AHSI_W94.4_N32.3_20230906_010629_L10000386730	Martin Lake_20230906	Martin Lake	electricity	32.2597	-94.5703	98	GF5B	20230906	2023-09-07 01:13:22	2023-09-06 17:13:22	TX	CST	2023-09-06 11:13:22	6146	09/06/2023	11:13	2665.3	2675.5	2419.92	1248.12	0.48423	225.217	20.7416	204.475	9.25999	7.09863	13.8401	12.5484	2.72	-1	0.7	0.0471312
73	GF5B_AHSI_W94.4_N32.3_20240213_012960_L10000468942	Martin Lake_20240213	Martin Lake	electricity	32.2597	-94.5703	98	GF5B	20240213	2024-02-14 01:13:08	2024-02-13 17:13:08	TX	CST	2024-02-13 11:13:08	6146	02/13/2024	11:13	1097.1	1103.7	996.57	1729.84	0.735798	177.503	16.4785	161.025	9.09611	5.53475	158.532	68.6973	1.3	-1	0.5	0.0434063
74	GF5B_AHSI_W94.5_N32.1_20230717_009886_L10000361780	Martin Lake_20230717	Martin Lake	electricity	32.2597	-94.5703	98	GF5B	20230717	2023-07-18 01:13:09	2023-07-17 17:13:09	TX	CST	2023-07-17 11:13:09	6146	07/17/2023	11:13	2491.4	2702.3	2301.61	2644.36	0.148916	327.919	27.7683	300.151	10.2314	10.9841	58.4662	77.3702	3.97	-1	0.7	0.0504062
75	GF5B_AHSI_W94.8_N32.3_20240601_014548_L10000524560	Martin Lake_20240601	Martin Lake	electricity	32.2597	-94.5703	98	GF5B	20240601	2024-06-02 01:13:43	2024-06-01 17:13:43	TX	CST	2024-06-01 11:13:43	6146	06/01/2024	11:13	647.8	634	584.962	1198.14	1.04823	134.112	20.3014	113.811	12.0335	7.34456	168.96	86.1696	1.53	-1	0	0.0445625
76	GF5B_AHSI_W96.5_N31.3_20221019_005938_L10000223290	Oak Grove_20221019	Oak Grove	electricity	31.185	-96.4853	129	GF5B	20221019	2022-10-20 01:17:28	2022-10-19 17:17:28	TX	CST	2022-10-19 11:17:28	6180	10/19/2022	11:17	1788.5	1803.2	1626.28	1998.08	0.22862	205.724	15.6094	190.115	7.74811	15.9355	46.4769	24.0131	1.55	-1	0.7	0.0297437	有排放
77	GF5B_AHSI_W96.9_N29.8_20221019_005938_L10000223293	Sam Seymour_20221019	Sam Seymour	electricity	29.9172	-96.7506	115	GF5B	20221019	2022-10-20 01:17:53	2022-10-19 17:17:53	TX	CST	2022-10-19 11:17:53	6179	10/19/2022	11:17	964.3	979	878.577	777.6	0.114932	144.184	10.9357	133.249	4.49569	6.36253	157.782	137.27	2.61	-1	0.7	0.0209875
78	GF5B_AHSI_W88.6_N37.1_20231212_012042_L10000435322	Shawnee_20231212	Shawnee	electricity	37.1517	-88.775	105	GF5B	20231212	2023-12-13 00:54:21	2023-12-12 16:54:21	KY	CST	2023-12-12 10:54:21	1379	12/12/2023	10:54	943.299	928	843.255	447.185	0.469692	55.3706	12.0707	43.2999	6.75291	5.07017	129.663	76.5014	1.77	-1	0.5	0.0422063	羽流飘到了水面上，水汽干扰大
79	GF5B_AHSI_W88.6_N37.2_20220326_002922_L10000100107	Shawnee_20220326	Shawnee	electricity	37.1517	-88.775	105	GF5B	20220326	2022-03-27 00:46:28	2022-03-26 16:46:28	KY	CST	2022-03-26 10:46:28	1379	03/26/2022	10:46	811.401	780.998	714.945	552.998	0.226517	66.9252	19.2617	47.6635	5.57866	4.91551	162.886	304.597	5.61	-1	0.5	0.0356438	羽流飘到了水面上，水汽干扰大
80	GF5B_AHSI_W88.7_N37.2_20230825_010454_L10000380643	Shawnee_20230825	Shawnee	electricity	37.1517	-88.775	105	GF5B	20230825	2023-08-26 00:54:41	2023-08-25 16:54:41	KY	CST	2023-08-25 10:54:41	1379	08/25/2023	10:54	1266.6	1261.2	1144.63	826.809	0.277665	163.821	22.14	141.681	10.0136	5.50064	118.857	103.406	2.61	-1	0.7	0.0513438	有排放，圆形，无羽流形状
81	GF5B_AHSI_W94.2_N45.6_20220602_003913_L10000141558	Sherburne County_20220602	Sherburne County	electricity	45.3792	-93.8958	292	GF5B	20220602	2022-06-03 01:19:01	2022-06-02 17:19:01	MN	CST	2022-06-02 11:19:01	6090	06/02/2022	11:19	411.9	411.2	373.468	528.33	0.414658	73.8063	22.7428	51.0636	7.57318	3.45015	54.1627	87.0213	4.82	-1	0.7	0.036
82	GF5B_AHSI_W85.2_N38.7_20231031_011430_L10000413176	Trimble County_20231031	Trimble County	electricity	38.5847	-85.4117	144	GF5B	20231031	2023-11-01 00:42:01	2023-10-31 16:42:01	KY	EST	2023-10-31 11:42:01	6071	10/31/2023	11:42	278.2	284.99	256.691	926.773	2.61047	152.902	24.4445	128.457	9.6528	5.90156	36.4664	38.8975	3.2	-1	0.5	0.048225	探测到了，但算的不准（该案例说明GF5的探测下限达到256t/h, 3m/s）
83	GF5B_AHSI_W85.3_N38.7_20230714_009842_L10000360353	Trimble County_20230714	Trimble County	electricity	38.5847	-85.4117	144	GF5B	20230714	2023-07-15 00:42:09	2023-07-14 16:42:09	KY	EST	2023-07-14 11:42:09	6071	07/14/2023	11:42	1373.5	1399.05	1262.24	1480.73	0.17309	161.43	20.8936	140.536	11.4319	7.95761	16.6218	8.42173	1.52	1	1	0.052025
84	GF5B_AHSI_W92.2_N34.3_20231006_011066_L10000401605	White Bluff_20231006	White Bluff	electricity	34.4236	-92.1392	93	GF5B	20231006	2023-10-07 01:05:59	2023-10-06 17:05:59	AR	CST	2023-10-06 11:05:59	6009	10/06/2023	11:05	320	380.1	294.843	478.482	0.622839	102.03	26.0309	75.9994	12.9888	4.8617	60.2811	56.2624	2.8	-1	0.5	0.0541813
85	ZY1E_AHSI_W101.95_N47.64_20201123_006296_L1A0000193277	Antelope Valley_20201123	Antelope Valley	electricity	47.371	-101.836	590	ZY1E	20201123	2020-11-23 18:05:58	2020-11-23 18:05:58	ND	CST	2020-11-23 12:05:58	6469	11/23/2020	12:05	372.7	365.9	337.594	385.692	0.142473	49.0575	18.868	30.1894	7.23912	8.15057	22.4736	48.2433	6.44	-1	0	0.0541688	这一景还是不太好反演
86	ZY1E_AHSI_W107.47_N40.60_20231007_021332_L1A0000663395	Craig_20231007	Craig	electricity	40.4627	-107.591	1939	ZY1E	20231007	2023-10-07 18:11:00	2023-10-07 18:11:00	CO	MST	2023-10-07 11:11:00	6021	10/07/2023	11:11	487.2	518.1	447.12	529.84	0.185007	63.6625	14.071	49.5915	9.39571	3.83911	4.05055	1.83625	1.36	1	0.7	0.0556	有排放 不像羽流
87	ZY1E_AHSI_W107.63_N40.60_20230715_020127_L1A0000628485	Craig_20230715	Craig	electricity	40.4627	-107.591	1939	ZY1E	20230715	2023-07-15 18:14:00	2023-07-15 18:14:00	CO	MST	2023-07-15 11:14:00	6021	07/15/2023	11:14	892.4	903.4	811.9	1121.6	0.381449	192.726	15.2481	177.478	7.72764	7.4937	172.558	161.63	2.81	-1	0.7	0.0421625	19波段较好
88	ZY1E_AHSI_W108.64_N36.61_20200917_005334_L1A0000154763	Four Corners Steam Elec Station_20200917	Four Corners Steam Elec Station	electricity	36.69	-108.481	1630	ZY1E	20200917	2020-09-17 18:19:28	2020-09-17 18:19:28	NM	MST	2020-09-17 11:19:28	2442	09/17/2020	11:19	1507.6	1506	1367.21	1230.06	0.100315	211.556	9.23892	202.317	4.62185	7.96025	71.6126	64.6901	2.71	-1	0.7	0.07115	羽流形状好
89	ZY1E_AHSI_W108.72_N36.61_20231007_021332_L1A0000663404	Four Corners Steam Elec Station_20231007	Four Corners Steam Elec Station	electricity	36.69	-108.481	1630	ZY1E	20231007	2023-10-07 18:12:07	2023-10-07 18:12:07	NM	MST	2023-10-07 11:12:07	2442	10/07/2023	11:12	1532.3	1509.9	1386.01	1076.95	0.222988	111.586	7.86886	103.717	4.79945	11.5649	16.847	9.54663	1.7	1	1	0.075475	羽流很完整，可以作为案例
90	ZY1E_AHSI_W86.17_N36.17_20220327_013308_L1A0000425155	Gallatin_20220327	Gallatin	electricity	36.3156	-86.4006	140	ZY1E	20220327	2022-03-27 16:51:51	2022-03-27 16:51:51	TN	CST	2022-03-27 10:51:51	3403	03/27/2022	10:51	307	306.4	278.043	145.028	0.478397	47.0998	20.787	26.3127	9.50697	2.23497	76.3407	63.1083	2.48	1	0	0.027275
91	ZY1E_AHSI_W86.59_N36.17_20221004_016048_L1A0000511602	Gallatin_20221004	Gallatin	electricity	36.3156	-86.4006	140	ZY1E	20221004	2022-10-04 16:51:33	2022-10-04 16:51:33	TN	CST	2022-10-04 10:51:33	3403	10/04/2022	10:51	758.6	764.3	692.586	808.948	0.168011	98.1144	21.5971	76.5173	11.8997	6.95218	121.334	59.858	1.48	-1	0.7	0.0308563	像伪排放源
92	ZY1E_AHSI_W101.24_N41.04_20230805_020428_L1A0000637084	Gerald Gentleman Station_20230805	Gerald Gentleman Station	electricity	41.0808	-101.141	948	ZY1E	20230805	2023-08-05 17:48:20	2023-08-05 17:48:20	NE	CST	2023-08-05 11:48:20	6077	08/05/2023	11:48	1358.5	1357.1	1231.39	2306.82	0.873339	229.54	40.4368	189.103	12.8536	9.28425	19.0869	38.3011	6.02	-1	0.7	0.0268563
93	ZY1E_AHSI_W101.46_N35.28_20220305_012995_L1A0000414997	Harrington Station_20220305	Harrington Station	electricity	35.2972	-101.748	1090	ZY1E	20220305	2022-03-05 17:52:24	2022-03-05 17:52:24	TX	CST	2022-03-05 11:52:24	6193	03/05/2022	11:52	167.2	177.3	159.622	169.66	0.062885	24.3356	14.5269	9.80875	4.25049	4.59089	126.422	453.435	10.76	-1	0	0.0379875	排放强度太低了，无法检测到
94	ZY1E_AHSI_W101.95_N35.28_20220331_013368_L1A0000427095	Harrington Station_20220331	Harrington Station	electricity	35.2972	-101.748	1090	ZY1E	20220331	2022-03-31 17:54:08	2022-03-31 17:54:08	TX	CST	2022-03-31 11:54:08	6193	03/31/2022	11:54	641.9	638.7	579.709	621.775	0.0725636	66.2828	10.2451	56.0377	3.51887	6.74526	9.12498	16.06	5.28	1	1	0.0470625
95	ZY1E_AHSI_W111.21_N39.27_20201004_005578_L1A0000168618	Hunter_20201004	Hunter	electricity	39.1747	-111.029	1725	ZY1E	20201004	2020-10-04 18:32:36	2020-10-04 18:32:36	UT	MST	2020-10-04 11:32:36	6165	10/04/2020	11:32	656	681.6	607.499	739.524	0.217326	171.224	10.5122	160.712	6.52555	6.54078	51.9697	36.8985	2.13	1	1	0.0165812	完美
96	ZY1E_AHSI_W111.31_N39.27_20200905_005163_L1A0000144224	Hunter_20200905	Hunter	electricity	39.1747	-111.029	1725	ZY1E	20200905	2020-09-05 18:32:32	2020-09-05 18:32:32	UT	MST	2020-09-05 11:32:32	6165	09/05/2020	11:32	1057.9	1295.6	1074.72	965.745	0.101396	105.429	10.9439	94.4849	6.57145	7.63792	22.4944	14.3214	1.91	-1	0.7	0.00791875	有羽流
97	ZY1E_AHSI_W98.07_N29.51_20220930_015991_L1A0000509878	J K Spruce_20220930	J K Spruce	electricity	29.3091	-98.3205	149	ZY1E	20220930	2022-09-30 17:31:53	2022-09-30 17:31:53	TX	CST	2022-09-30 11:31:53	7097	09/30/2022	11:31	1501.1	1499.5	1361.03	1205.83	0.11403	131.475	16.1758	115.3	8.62854	14.2649	41.4006	22.2183	1.61	-1	0.7	0.0173875	有噪声，有羽流
98	ZY1E_AHSI_W98.20_N29.06_20220418_013626_L1A0000435959	J K Spruce_20220418	J K Spruce	electricity	29.3091	-98.3205	149	ZY1E	20220418	2022-04-18 17:33:49	2022-04-18 17:33:49	TX	CST	2022-04-18 11:33:49	7097	04/18/2022	11:33	629.1	628.9	570.61	599.348	0.0503635	66.9125	19.9994	46.9131	6.11914	6.86404	170.841	366.739	6.44	-1	0.7	0.0274688
99	ZY1E_AHSI_W98.50_N29.51_20200930_005521_L1A0000170469	J K Spruce_20200930	J K Spruce	electricity	29.3091	-98.3205	149	ZY1E	20200930	2020-09-30 17:33:03	2020-09-30 17:33:03	TX	CST	2020-09-30 11:33:03	7097	09/30/2020	11:33	914.9	958.2	851.588	949.204	0.114628	150.568	18.1877	132.381	7.28708	9.05522	116.942	123.958	3.18	-1	0.7	0.0273688
100	ZY1E_AHSI_W98.51_N29.06_20201029_005935_L1A0000194928	J K Spruce_20201029	J K Spruce	electricity	29.3091	-98.3205	149	ZY1E	20201029	2020-10-29 17:33:12	2020-10-29 17:33:12	TX	CST	2020-10-29 11:33:12	7097	10/29/2020	11:33	508.1	564.9	489.281	425.959	0.129419	53.2414	22.1621	31.0792	6.82703	5.10618	0.403266	0.963806	7.17	1	0.7	0.0222437	有团块排放
101	ZY1E_AHSI_W98.53_N29.51_20220514_013997_L1A0000447750	J K Spruce_20220514	J K Spruce	electricity	29.3091	-98.3205	149	ZY1E	20220514	2022-05-14 17:35:16	2022-05-14 17:35:16	TX	CST	2022-05-14 11:35:16	7097	05/14/2022	11:35	1041	1035.2	941.31	1128.89	0.199281	261.576	14.8092	246.767	7.68078	11.0935	24.8087	17.5315	2.12	-1	0.7	0.0294188
102	ZY1E_AHSI_W108.68_N41.92_20200911_005248_L1A0000148906	Jim Bridger_20200911	Jim Bridger	electricity	41.7378	-108.787	2044	ZY1E	20200911	2020-09-11 18:24:53	2020-09-11 18:24:53	WY	MST	2020-09-11 11:24:53	8066	09/11/2020	11:24	1437.4	1314.4	1259.35	1579.29	0.254048	134.744	18.8955	115.849	6.60441	6.79421	63.6503	150.851	7.11	-1	0.7	0.063525	排放位置在山上，不像排放源
103	ZY1E_AHSI_W108.78_N41.92_20200813_004832_L1A0000126505	Jim Bridger_20200813	Jim Bridger	electricity	41.7378	-108.787	2044	ZY1E	20200813	2020-08-13 18:24:46	2020-08-13 18:24:46	WY	MST	2020-08-13 11:24:46	8066	08/13/2020	11:24	1902.1	1640.8	1630.74	822.724	0.49549	84.009	11.1894	72.8196	4.1694	8.24685	33.7319	60.8299	5.41	-1	0.7	0.0555812	羽流形状很好，不过怎么风速有点问题
104	ZY1E_AHSI_W94.33_N38.38_20211206_011716_L1A0000374910	La Cygne_20211206	La Cygne	electricity	38.3472	-94.6467	263	ZY1E	20211206	2021-12-06 17:27:03	2021-12-06 17:27:03	KS	CST	2021-12-06 11:27:03	1241	12/06/2021	11:27	365.5	442.9	363.173	323.493	0.10926	53.9547	22.4829	31.4718	7.83144	5.52911	154.044	245.443	4.78	-1	0.5	0.0279125
105	ZY1E_AHSI_W94.44_N38.38_20210913_010511_L1A0000334632	La Cygne_20210913	La Cygne	electricity	38.3472	-94.6467	263	ZY1E	20210913	2021-09-13 17:27:32	2021-09-13 17:27:32	KS	CST	2021-09-13 11:27:32	1241	09/13/2021	11:27	662.6	671	604.53	582.825	0.0359029	86.3155	34.7294	51.5861	12.5655	6.36248	58.2375	105.022	5.41	-1	0.5	0.044475
106	ZY1E_AHSI_W94.49_N38.38_20200711_004357_L1A0000107667	La Cygne_20200711	La Cygne	electricity	38.3472	-94.6467	263	ZY1E	20200711	2020-07-11 17:23:19	2020-07-11 17:23:19	KS	CST	2020-07-11 11:23:19	1241	07/11/2020	11:23	1601.4	1598	1451.58	1866.68	0.285962	334.829	29.0174	305.811	13.2889	13.2576	13.3357	12.091	2.72	1	1	0.0438062	反演效果不好，只有一团排放；感觉有点像是把水汽也核算进去了，偏高很多；误差太大了
107	ZY1E_AHSI_W90.79_N38.83_20210925_010683_L1A0000340283	Labadie_20210925	Labadie	electricity	38.5583	-90.8361	146	ZY1E	20210925	2021-09-25 17:13:23	2021-09-25 17:13:23	MO	CST	2021-09-25 11:13:23	2103	09/25/2021	11:13	1746.6	1732.6	1581.74	1346.4	0.148781	230.596	27.3649	203.231	12.1852	6.86417	2.74145	2.68662	2.94	-1	0.7	0.0544063
108	ZY1E_AHSI_W90.90_N38.38_20220113_012261_L1A0000391512	Labadie_20220113	Labadie	electricity	38.5583	-90.8361	146	ZY1E	20220113	2022-01-13 17:13:19	2022-01-13 17:13:19	MO	CST	2022-01-13 11:13:19	2103	01/13/2022	11:13	1841.4	1849.6	1672.1	1099	0.342742	124.828	18.7397	106.088	10.7721	4.98901	124.233	71.641	1.73	-1	0.7	0.041875
109	ZY1E_AHSI_W90.98_N38.38_20230329_018573_L1A0000585856	Labadie_20230329	Labadie	electricity	38.5583	-90.8361	146	ZY1E	20230329	2023-03-29 17:07:56	2023-03-29 17:07:56	MO	CST	2023-03-29 11:07:56	2103	03/29/2023	11:07	2464.5	2453.2	2234.56	1974.94	0.116184	202.136	13.7565	188.379	7.01033	6.20069	4.015	2.11456	1.58	1	0.7	0.0442688	羽流沿着江面规整陈列
110	ZY1E_AHSI_W104.76_N41.92_20230917_021045_L1A0000655064	Laramie River_20230917	Laramie River	electricity	42.1103	-104.883	1393	ZY1E	20230917	2023-09-17 18:02:08	2023-09-17 18:02:08	WY	MST	2023-09-17 11:02:08	6204	09/17/2023	11:02	1667.1	1881.6	1518.85	1453	0.0433551	130.037	29.3537	100.683	8.45558	4.16364	172.905	448.975	7.79	-1	0.7	0.0451063	羽流良好
111	ZY1E_AHSI_W104.93_N41.92_20230625_019840_L1A0000620580	Laramie River_20230625	Laramie River	electricity	42.1103	-104.883	1393	ZY1E	20230625	2023-06-25 18:05:08	2023-06-25 18:05:08	WY	MST	2023-06-25 11:05:08	6204	06/25/2023	11:05	1043.4	1114.7	951.947	1106.94	0.162819	216.61	19.3713	197.238	10.0876	10.3877	127.687	107.257	2.52	1	0.7	0.066525	有排放
112	ZY1E_AHSI_W105.13_N42.36_20200825_005004_L1A0000136593	Laramie River_20200825	Laramie River	electricity	42.1103	-104.883	1393	ZY1E	20200825	2020-08-25 18:10:51	2020-08-25 18:10:51	WY	MST	2020-08-25 11:10:51	6204	08/25/2020	11:10	520.3	520.5	472.038	585.978	0.241377	94.1793	11.1631	83.0162	5.16341	7.95905	168.891	176.209	3.13	-1	0.7	0.0381063
113	ZY1E_AHSI_W94.40_N32.17_20210401_008144_L1A0000261751	Martin Lake_20210401	Martin Lake	electricity	32.2597	-94.5703	98	ZY1E	20210401	2021-04-01 17:20:59	2021-04-01 17:20:59	TX	CST	2021-04-01 11:20:59	6146	04/01/2021	11:20	1201.3	1170.4	1080.46	940.995	0.129077	158.284	21.9195	136.365	9.26453	6.07439	171.17	174.594	3.06	-1	0.7	0.04435	有羽流
114	ZY1E_AHSI_W94.59_N32.17_20220303_012967_L1A0000414108	Martin Lake_20220303	Martin Lake	electricity	32.2597	-94.5703	98	ZY1E	20220303	2022-03-03 17:22:15	2022-03-03 17:22:15	TX	CST	2022-03-03 11:22:15	6146	03/03/2022	11:22	1866.9	1838.5	1684.18	1344.32	0.201795	128.801	13.1743	115.627	8.37224	7.03888	16.032	3.09952	0.58	-1	-1	0.0434438	这一景本应该能够看到完美羽流的，但是羽流的方向刚好经过了湖面，导致出现一段非常大的异常高值
115	ZY1E_AHSI_W94.77_N32.17_20210104_006896_L1A0000221658	Martin Lake_20210104	Martin Lake	electricity	32.2597	-94.5703	98	ZY1E	20210104	2021-01-04 17:21:40	2021-01-04 17:21:40	TX	CST	2021-01-04 11:21:40	6146	01/04/2021	11:21	1286	1418.3	1208.65	1175.55	0.027386	132.365	16.9434	115.422	9.59377	4.78936	40.439	26.4201	1.96	-1	0.5	0.0507375	水汽干扰大，几乎无反演结果
116	ZY1E_AHSI_W96.19_N31.29_20220130_012507_L1A0000399543	Oak Grove_20220130	Oak Grove	electricity	31.185	-96.4853	129	ZY1E	20220130	2022-01-30 17:28:05	2022-01-30 17:28:05	TX	CST	2022-01-30 11:28:05	6180	01/30/2022	11:28	1396	1398.9	1267.66	833.168	0.34275	103.427	20.142	83.2855	6.98064	8.23632	82.6559	127.29	4.62	-1	0.7	0.0190875
117	ZY1E_AHSI_W96.23_N31.29_20220326_013296_L1A0000424559	Oak Grove_20220326	Oak Grove	electricity	31.185	-96.4853	129	ZY1E	20220326	2022-03-26 17:27:55	2022-03-26 17:27:55	TX	CST	2022-03-26 11:27:55	6180	03/26/2022	11:27	767.3	835.6	723.965	775.297	0.0709044	121.008	16.7206	104.287	6.90581	8.21208	8.64284	9.50712	3.3	-1	0.7	0.0251563
118	ZY1E_AHSI_W96.26_N31.29_20201006_005607_L1A0000169633	Oak Grove_20201006	Oak Grove	electricity	31.185	-96.4853	129	ZY1E	20201006	2020-10-06 17:25:38	2020-10-06 17:25:38	TX	CST	2020-10-06 11:25:38	6180	10/06/2020	11:25	1874.4	1879.2	1702.24	1556.38	0.0856901	171.801	19.3121	152.489	10.8168	9.63164	2.80282	1.80315	1.93	-1	0.7	0.0304312	有排放，无羽流
119	ZY1E_AHSI_W96.28_N31.29_20210424_008474_L1A0000271419	Oak Grove_20210424	Oak Grove	electricity	31.185	-96.4853	129	ZY1E	20210424	2021-04-24 17:27:56	2021-04-24 17:27:56	TX	CST	2021-04-24 11:27:56	6180	04/24/2021	11:27	893.6	900.9	813.64	1237.88	0.521415	127.507	25.1962	102.31	8.51841	9.80526	170.389	337.939	5.95	-1	0.7	0.0375562	偏高
120	ZY1E_AHSI_W96.41_N31.29_20211206_011716_L1A0000374926	Oak Grove_20211206	Oak Grove	electricity	31.185	-96.4853	129	ZY1E	20211206	2021-12-06 17:29:06	2021-12-06 17:29:06	TX	CST	2021-12-06 11:29:06	6180	12/06/2021	11:29	1798.7	1790.1	1627.98	1163.89	0.285072	114.082	33.2425	80.8394	9.85712	5.83278	152.929	395.576	7.76	-1	0.7	0.0217938	有一点点羽流
121	ZY1E_AHSI_W96.58_N31.29_20200711_004359_L1A0000107694	Oak Grove_20200711	Oak Grove	electricity	31.185	-96.4853	129	ZY1E	20200711	2020-07-11 17:25:19	2020-07-11 17:25:19	TX	CST	2020-07-11 11:25:19	6180	07/11/2020	11:25	1869.6	1875.6	1698.34	1841.09	0.0840516	273.956	23.3615	250.595	9.1374	12.8693	1.63683	1.77868	3.26	1	1	0.0343313	羽流可以
122	ZY1E_AHSI_W96.74_N31.10_20200612_003941_L1A0000093912	Oak Grove_20200612	Oak Grove	electricity	31.185	-96.4853	129	ZY1E	20200612	2020-06-12 17:25:12	2020-06-12 17:25:12	TX	CST	2020-06-12 11:25:12	6180	06/12/2020	11:25	1759.1	1762.5	1597.11	1745.77	0.0930778	227.977	31.1169	196.86	11.6421	10.8001	14.8252	19.7669	4	-1	0.7	0.0377062	排放羽流很清晰
123	ZY1E_AHSI_W96.55_N29.95_20220130_012507_L1A0000399546	Sam Seymour_20220130	Sam Seymour	electricity	29.9172	-96.7506	115	ZY1E	20220130	2022-01-30 17:28:28	2022-01-30 17:28:28	TX	CST	2022-01-30 11:28:28	6179	01/30/2022	11:28	1394.8	1390.4	1263.48	820.59	0.350531	143.507	14.6274	128.88	6.40762	8.66151	13.4543	12.6919	2.83	-1	0.7	0.0214875
124	ZY1E_AHSI_W96.59_N29.95_20220326_013296_L1A0000424562	Sam Seymour_20220326	Sam Seymour	electricity	29.9172	-96.7506	115	ZY1E	20220326	2022-03-26 17:28:17	2022-03-26 17:28:17	TX	CST	2022-03-26 11:28:17	6179	03/26/2022	11:28	1765.4	1773.9	1605.14	1459.35	0.0908257	183.666	18.3842	165.282	6.82593	10.7273	29.6323	39.3122	3.98	-1	0.7	0.083525	能看到排放，但羽流飘到了湖面上
125	ZY1E_AHSI_W96.65_N29.95_20210424_008474_L1A0000271422	Sam Seymour_20210424	Sam Seymour	electricity	29.9172	-96.7506	115	ZY1E	20210424	2021-04-24 17:28:19	2021-04-24 17:28:19	TX	CST	2021-04-24 11:28:19	6179	04/24/2021	11:28	1037.5	1164.7	995.055	1141.34	0.14701	113.656	21.4709	92.1856	6.75929	5.85867	167.481	343.336	6.15	-1	0.7	0.0373
126	ZY1E_AHSI_W96.95_N29.95_20200711_004359_L1A0000107697	Sam Seymour_20200711	Sam Seymour	electricity	29.9172	-96.7506	115	ZY1E	20200711	2020-07-11 17:25:42	2020-07-11 17:25:42	TX	CST	2020-07-11 11:25:42	6179	07/11/2020	11:25	1793.1	1824.9	1638.69	1512.96	0.0767274	252.917	14.407	238.51	6.25814	16.5075	36.5968	34.401	2.82	-1	0.7	0.0312375	有羽流，还不错，飘到水面上了，前16波段清晰；作为强吸收和弱吸收的案例
127	ZY1E_AHSI_W97.05_N29.95_20200612_003941_L1A0000093915	Sam Seymour_20200612	Sam Seymour	electricity	29.9172	-96.7506	115	ZY1E	20200612	2020-06-12 17:25:31	2020-06-12 17:25:31	TX	CST	2020-06-12 11:25:31	6179	06/12/2020	11:25	1467.5	1562.8	1367.32	1653.65	0.209416	223.548	20.7065	202.841	7.48002	14.8057	15.7202	19.0738	3.64	-1	0.7	0.02765	羽流形状很好，可以作为案例
128	ZY1E_AHSI_W88.87_N37.06_20211128_011601_L1A0000371189	Shawnee_20211128	Shawnee	electricity	37.1517	-88.775	105	ZY1E	20211128	2021-11-28 17:03:59	2021-11-28 17:03:59	KY	CST	2021-11-28 11:03:59	1379	11/28/2021	11:03	406.4	406.4	368.68	284.298	0.228877	54.8857	18.8206	36.0651	8.02407	5.74487	128.961	150.885	3.51	-1	0.5	0.0540062	有排放
129	ZY1E_AHSI_W88.95_N37.06_20210119_007111_L1A0000229838	Shawnee_20210119	Shawnee	electricity	37.1517	-88.775	105	ZY1E	20210119	2021-01-19 17:02:53	2021-01-19 17:02:53	KY	CST	2021-01-19 11:02:53	1379	01/19/2021	11:02	868.501	669.401	781.87	651.819	0.166333	76.7881	14.6655	62.1226	8.69457	4.27976	151.407	79.2363	1.57	1	0.7	0.0245437	右下角伪排放源
130	ZY1E_AHSI_W89.08_N37.06_20201221_006696_L1A0000212411	Shawnee_20201221	Shawnee	electricity	37.1517	-88.775	105	ZY1E	20201221	2020-12-21 17:03:04	2020-12-21 17:03:04	KY	CST	2020-12-21 11:03:04	1379	12/21/2020	11:03	386.9	386.599	350.976	426.236	0.21443	55.5735	22.2105	33.363	7.74834	5.9281	63.6019	136.532	6.44	-1	0	0.0404813
131	ZY1E_AHSI_W93.56_N45.45_20220320_013210_L1A0000421897	Sherburne County_20220320	Sherburne County	electricity	45.3792	-93.8958	292	ZY1E	20220320	2022-03-20 17:31:14	2022-03-20 17:31:14	MN	CST	2022-03-20 11:31:14	6090	03/20/2022	11:31	1451.2	1311.2	1250.89	1087.59	0.130548	131.067	24.6613	106.405	13.5499	5.7328	4.62706	2.94589	1.91	-1	0.7	0.0484687
132	ZY1E_AHSI_W94.02_N45.45_20220927_015948_L1A0000508557	Sherburne County_20220927	Sherburne County	electricity	45.3792	-93.8958	292	ZY1E	20220927	2022-09-27 17:31:08	2022-09-27 17:31:08	MN	CST	2022-09-27 11:31:08	6090	09/27/2022	11:31	1052.9	1052.9	955.175	979.139	0.0250885	164.715	34.5275	130.187	15.1422	4.84158	22.8149	25.4006	3.34	-1	0.7	0.0586125	有羽流
133	ZY1E_AHSI_W85.49_N38.38_20220327_013308_L1A0000425150	Trimble County_20220327	Trimble County	electricity	38.5847	-85.4117	144	ZY1E	20220327	2022-03-27 16:51:14	2022-03-27 16:51:14	KY	EST	2022-03-27 11:51:14	6071	03/27/2022	11:51	412.9	409.2	371.723	271.084	0.270738	51.8227	18.4025	33.4202	6.89861	4.57908	111.436	134.466	3.62	-1	0	0.0470625
134	ZY1E_AHSI_W91.94_N34.40_20220726_015044_L1A0000481359	White Bluff_20220726	White Bluff	electricity	34.4236	-92.1392	93	ZY1E	20220726	2022-07-26 17:12:13	2022-07-26 17:12:13	AR	CST	2022-07-26 11:12:13	6009	07/26/2022	11:12	1389.4	1742.2	1324.45	893.574	0.325326	153.175	31.5488	121.626	13.9936	6.52915	162.228	176.288	3.26	-1	0.7	0.0465062	微弱的排放
135	ZY1E_AHSI_W92.11_N34.40_20220113_012261_L1A0000391521	White Bluff_20220113	White Bluff	electricity	34.4236	-92.1392	93	ZY1E	20220113	2022-01-13 17:14:27	2022-01-13 17:14:27	AR	CST	2022-01-13 11:14:27	6009	01/13/2022	11:14	901.3	897.1	816.757	470.118	0.424408	113.444	19.3904	94.0535	11.6792	8.62742	119.944	91.1574	2.28	-1	0.7	0.0509625	没有排放
136	ZY1E_AHSI_W92.15_N34.40_20220309_013050_L1A0000416988	White Bluff_20220309	White Bluff	electricity	34.4236	-92.1392	93	ZY1E	20220309	2022-03-09 17:14:19	2022-03-09 17:14:19	AR	CST	2022-03-09 11:14:19	6009	03/09/2022	11:14	280.3	279.1	254.03	1265.08	3.98006	223.478	24.787	198.691	10.729	10.1452	67.8404	63.9961	2.83	1	0.5	0.0207437	很多云，不适合反演
137	ZY1E_AHSI_W92.33_N34.40_20231104_021729_L1A0000674441	White Bluff_20231104	White Bluff	electricity	34.4236	-92.1392	93	ZY1E	20231104	2023-11-04 17:03:42	2023-11-04 17:03:42	AR	CST	2023-11-04 11:03:42	6009	11/04/2023	11:03	537.3	433.2	482.708	521.31	0.0799681	65.6737	19.283	46.3907	12.4076	5.37124	104.693	30.012	0.86	1	0.7	0.0518812
138	ZY1F_AHSI_W107.55_N40.59_20231020_009525_L1A0000564874	Craig_20231020	Craig	electricity	40.4627	-107.591	1939	ZY1F	20231020	2023-10-20 18:26:24	2023-10-20 18:26:24	CO	MST	2023-10-20 11:26:24	6021	10/20/2023	11:26	729.3	742.5	666.799	128.457	0.807353	21.8963	11.0855	10.8108	8.71632	3.03636	17.6539	2.47155	0.42	1	0.5	0.0544688	22有一个羽流 24双羽流0.001
139	ZY1F_AHSI_W86.57_N36.17_20230305_006234_L1A0000379047	Gallatin_20230305	Gallatin	electricity	36.3156	-86.4006	140	ZY1F	20230305	2023-03-05 16:54:32	2023-03-05 16:54:32	TN	CST	2023-03-05 10:54:32	3403	03/05/2023	10:54	278.3	276	250.592	309.343	0.234451	69.4599	13.8431	55.6168	6.22066	3.41463	132.656	110.547	2.5	-1	0	0.0280437	无排放
140	ZY1F_AHSI_W101.04_N41.04_20230916_009032_L1A0000537816	Gerald Gentleman Station_20230916	Gerald Gentleman Station	electricity	41.0808	-101.141	948	ZY1F	20230916	2023-09-16 18:00:26	2023-09-16 18:00:26	NE	CST	2023-09-16 12:00:26	6077	09/16/2023	12:00	1330.8	1109.2	1207.28	1372.6	0.136931	174.173	18.0313	156.141	6.82273	15.5633	26.5828	35.0893	3.96	1	0.7	0.034175
141	ZY1F_AHSI_W101.05_N41.04_20231110_009821_L1A0000582861	Gerald Gentleman Station_20231110	Gerald Gentleman Station	electricity	41.0808	-101.141	948	ZY1F	20231110	2023-11-10 18:01:07	2023-11-10 18:01:07	NE	CST	2023-11-10 12:01:07	6077	11/10/2023	12:01	1304.1	1307.4	1183.11	943.197	0.202782	101.98	11.6985	90.2818	3.9421	6.02035	83.0996	135.175	4.88	-1	0.7	0.0268812
142	ZY1F_AHSI_W101.48_N41.04_20230624_007827_L1A0000469131	Gerald Gentleman Station_20230624	Gerald Gentleman Station	electricity	41.0808	-101.141	948	ZY1F	20230624	2023-06-24 18:00:53	2023-06-24 18:00:53	NE	CST	2023-06-24 12:00:53	6077	06/24/2023	12:00	688	687.2	624.143	585.485	0.0619379	57.6905	16.5019	41.1886	5.75179	38.8239	34.456	87.2886	7.6	1	1	0.0373313	10波段效果好
143	ZY1F_AHSI_W80.08_N39.27_20220621_002553_L1A0000190867	Harrison Power Station_20220621	Harrison Power Station	electricity	39.3844	-80.3325	299	ZY1F	20220621	2022-06-21 16:24:44	2022-06-21 16:24:44	WV	EST	2022-06-21 11:24:44	3944	06/21/2022	11:24	1900.6	2008.4	1763.31	1484.33	0.158214	307.157	17.7253	289.432	8.6008	13.7901	25.0176	19.4303	2.33	1	1	0.046025	非常清晰
144	ZY1F_AHSI_W80.61_N39.27_20230418_006865_L1A0000414746	Harrison Power Station_20230418	Harrison Power Station	electricity	39.3844	-80.3325	299	ZY1F	20230418	2023-04-18 16:34:27	2023-04-18 16:34:27	WV	EST	2023-04-18 11:34:27	3944	04/18/2023	11:34	631.6	618	565.987	648.056	0.145003	72.0684	17.0568	55.0116	5.30037	6.53356	169.114	323.007	5.73	1	0.7	0.0325312
145	ZY1F_AHSI_W110.71_N39.27_20230817_008602_L1A0000512937	Hunter_20230817	Hunter	electricity	39.1747	-111.029	1725	ZY1F	20230817	2023-08-17 18:36:51	2023-08-17 18:36:51	UT	MST	2023-08-17 11:36:51	6165	08/17/2023	11:36	654	651.7	592.047	823.157	0.390358	193.608	7.07263	186.535	4.35271	15.5746	123.853	85.0454	2.06	1	0.7	0.0088375
146	ZY1F_AHSI_W110.73_N39.27_20230623_007813_L1A0000468861	Hunter_20230623	Hunter	electricity	39.1747	-111.029	1725	ZY1F	20230623	2023-06-23 18:36:03	2023-06-23 18:36:03	UT	MST	2023-06-23 11:36:03	6165	06/23/2023	11:36	422.6	419.8	381.852	545.002	0.427259	58.0028	14.1792	43.8236	4.90173	3.84706	53.9514	111.32	6.19	-1	0.7	0.0267812	有点不像
147	ZY1F_AHSI_W111.15_N39.27_20230719_008186_L1A0000490264	Hunter_20230719	Hunter	electricity	39.1747	-111.029	1725	ZY1F	20230719	2023-07-19 18:38:10	2023-07-19 18:38:10	UT	MST	2023-07-19 11:38:10	6165	07/19/2023	11:38	656.412	749.552	649.001	566.381	0.127302	54.0348	5.83572	48.199	4.51397	18.8933	60.6186	10.1031	0.5	1	-1	0.0084	清晰完美
148	ZY1F_AHSI_W98.47_N29.51_20221013_004183_L1A0000250381	J K Spruce_20221013	J K Spruce	electricity	29.3091	-98.3205	149	ZY1F	20221013	2022-10-13 17:33:02	2022-10-13 17:33:02	TX	CST	2022-10-13 11:33:02	7097	10/13/2022	11:33	1492.3	1495.9	1355.59	1607.99	0.186194	153.188	17.1995	135.989	5.08199	7.99581	166.203	319.109	5.76	-1	0.7	0.0246375	噪声较大
149	ZY1F_AHSI_W94.55_N38.38_20220920_003853_L1A0000229994	La Cygne_20220920	La Cygne	electricity	38.3472	-94.6467	263	ZY1F	20220920	2022-09-20 17:24:31	2022-09-20 17:24:31	KS	CST	2022-09-20 11:24:31	1241	09/20/2022	11:24	759.1	765.6	691.003	718.28	0.039475	87.8141	20.4481	67.366	6.67484	4.93149	129.19	215.748	5.01	-1	0.7	0.0315812	水汽影响太大了
150	ZY1F_AHSI_W94.56_N38.38_20230816_008587_L1A0000512042	La Cygne_20230816	La Cygne	electricity	38.3472	-94.6467	263	ZY1F	20230816	2023-08-16 17:31:23	2023-08-16 17:31:23	KS	CST	2023-08-16 11:31:23	1241	08/16/2023	11:31	1273.7	1441.1	1233.94	974.576	0.210194	172.071	17.2753	154.796	7.70278	14.7593	136.528	127.426	2.8	1	0.7	0.048675	飘到湖面上了
151	ZY1F_AHSI_W94.58_N38.38_20230108_005431_L1A0000329362	La Cygne_20230108	La Cygne	electricity	38.3472	-94.6467	263	ZY1F	20230108	2023-01-08 17:27:27	2023-01-08 17:27:27	KS	CST	2023-01-08 11:27:27	1241	01/08/2023	11:27	1406.5	1398.2	1272.57	986.883	0.224494	101.379	10.3782	91.001	6.45968	5.23319	27.3646	10.9459	1.2	-1	0.7	0.0195563	噪声较大
152	ZY1F_AHSI_W90.79_N38.83_20230704_007970_L1A0000476992	Labadie_20230704	Labadie	electricity	38.5583	-90.8361	146	ZY1F	20230704	2023-07-04 17:16:01	2023-07-04 17:16:01	MO	CST	2023-07-04 11:16:01	2103	07/04/2023	11:16	2560.7	2558.1	2322.4	2659.74	0.145256	522.422	23.7923	498.629	10.9846	17.0258	113.61	91.267	2.41	1	0.7	0.0224312	构成羽流，有排放
153	ZY1F_AHSI_W90.93_N38.38_20231022_009549_L1A0000565683	Labadie_20231022	Labadie	electricity	38.5583	-90.8361	146	ZY1F	20231022	2023-10-22 17:17:43	2023-10-22 17:17:43	MO	CST	2023-10-22 11:17:43	2103	10/22/2023	11:17	2197.7	2194	1992.77	1787.79	0.102862	195.601	20.5648	175.036	10.3641	6.37567	100.011	64.007	1.92	-1	0.7	0.052475	受江水影响较大
154	ZY1F_AHSI_W104.83_N41.92_20230930_009233_L1A0000549577	Laramie River_20230930	Laramie River	electricity	42.1103	-104.883	1393	ZY1F	20230930	2023-09-30 18:16:43	2023-09-30 18:16:43	WY	MST	2023-09-30 11:16:43	6204	09/30/2023	11:16	798.9	661.1	691.414	778.781	0.12636	115.297	13.4952	101.802	5.60189	6.63395	15.3476	17.3939	3.4	-1	0.7	0.0519437	有羽流
155	ZY1F_AHSI_W94.55_N32.17_20231210_010251_L1A0000608285	Martin Lake_20231210	Martin Lake	electricity	32.2597	-94.5703	98	ZY1F	20231210	2023-12-10 17:27:08	2023-12-10 17:27:08	TX	CST	2023-12-10 11:27:08	6146	12/10/2023	11:27	1027.6	1026.4	931.733	720.413	0.226803	91.9914	22.0198	69.9717	7.51168	8.10665	110.241	176.019	4.79	-1	0.7	0.0413562	有羽流
156	ZY1F_AHSI_W94.57_N32.17_20220802_003150_L1A0000184740	Martin Lake_20220802	Martin Lake	electricity	32.2597	-94.5703	98	ZY1F	20220802	2022-08-02 17:17:29	2022-08-02 17:17:29	TX	CST	2022-08-02 11:17:29	6146	08/02/2022	11:17	2263.6	2623.6	2146.04	2225.11	0.0368487	318.528	26.8459	291.682	10.633	9.10915	128.636	145.359	3.39	-1	0.7	0.0468688	有排放，圆形，堆叠状，飘到湖面上
157	ZY1F_AHSI_W94.61_N32.17_20221120_004728_L1A0000290523	Martin Lake_20221120	Martin Lake	electricity	32.2597	-94.5703	98	ZY1F	20221120	2022-11-20 17:20:45	2022-11-20 17:20:45	TX	CST	2022-11-20 11:20:45	6146	11/20/2022	11:20	2635.2	2664.4	2399.44	1835.49	0.235036	299.419	25.2379	274.181	10.6008	7.91849	161.859	160.241	2.97	-1	0.7	0.0447875	有一点羽流比较稀疏
158	ZY1F_AHSI_W96.64_N31.29_20220727_003064_L1A0000178119	Oak Grove_20220727	Oak Grove	electricity	31.185	-96.4853	129	ZY1F	20220727	2022-07-27 17:24:51	2022-07-27 17:24:51	TX	CST	2022-07-27 11:24:51	6180	07/27/2022	11:24	1241	1493.7	1217.51	1563.4	0.284092	201.546	16.6601	184.886	5.88456	10.9634	8.60896	10.876	3.79	-1	0.7	0.0293937
159	ZY1F_AHSI_W96.65_N31.29_20230304_006220_L1A0000378222	Oak Grove_20230304	Oak Grove	electricity	31.185	-96.4853	129	ZY1F	20230304	2023-03-04 17:30:35	2023-03-04 17:30:35	TX	CST	2023-03-04 11:30:35	6180	03/04/2023	11:30	650.4	654.3	591.802	574.759	0.028798	82.636	14.8256	67.8104	5.50325	8.11752	27.2719	34.5444	3.8	-1	0.7	0.0306125	被云挡住了
160	ZY1F_AHSI_W96.65_N31.29_20230816_008587_L1A0000512058	Oak Grove_20230816	Oak Grove	electricity	31.185	-96.4853	129	ZY1F	20230816	2023-08-16 17:33:23	2023-08-16 17:33:23	TX	CST	2023-08-16 11:33:23	6180	08/16/2023	11:33	1820.5	1806.6	1644.59	2362.85	0.436738	420.891	14.2775	406.613	5.89359	22.0618	1.68558	1.46084	2.6	1	1	0.026525	羽流很好，简直完美！！！适合作为案例
161	ZY1F_AHSI_W96.67_N31.29_20230108_005431_L1A0000329378	Oak Grove_20230108	Oak Grove	electricity	31.185	-96.4853	129	ZY1F	20230108	2023-01-08 17:29:27	2023-01-08 17:29:27	TX	CST	2023-01-08 11:29:27	6180	01/08/2023	11:29	1957.3	1974.5	1783.17	1183.82	0.336118	138.235	15.0988	123.136	5.11732	8.87919	6.04954	8.87266	4.4	1	1	0.0279063	有羽流，水池下方有一个点源
162	ZY1F_AHSI_W97.01_N29.95_20230304_006220_L1A0000378225	Sam Seymour_20230304	Sam Seymour	electricity	29.9172	-96.7506	115	ZY1F	20230304	2023-03-04 17:30:57	2023-03-04 17:30:57	TX	CST	2023-03-04 11:30:57	6179	03/04/2023	11:30	672.8	881.2	704.883	1204.93	0.709399	192.808	15.2595	177.548	6.18047	8.39572	19.5928	19.6581	3.01	1	1	0.0215375
163	ZY1F_AHSI_W97.01_N29.95_20230816_008587_L1A0000512061	Sam Seymour_20230816	Sam Seymour	electricity	29.9172	-96.7506	115	ZY1F	20230816	2023-08-16 17:33:45	2023-08-16 17:33:45	TX	CST	2023-08-16 11:33:45	6179	08/16/2023	11:33	1354.8	1363.7	1233.49	1394.58	0.130596	277.695	11.1267	266.568	4.92906	10.5916	5.87723	4.64301	2.37	1	1	0.0271125
164	ZY1F_AHSI_W88.63_N37.05_20231031_009677_L1A0000574307	Shawnee_20231031	Shawnee	electricity	37.1517	-88.775	105	ZY1F	20231031	2023-10-31 17:07:20	2023-10-31 17:07:20	KY	CST	2023-10-31 11:07:20	1379	10/31/2023	11:07	879.1	888.799	798.533	495.604	0.379357	83.7047	22.2929	61.4118	8.23313	3.78432	97.4388	116.927	3.6	1	0.5	0.0618688	羽流飘到了水面上，水汽干扰大
165	ZY1F_AHSI_W93.93_N45.45_20220721_002978_L1A0000173921	Sherburne County_20220721	Sherburne County	electricity	45.3792	-93.8958	292	ZY1F	20220721	2022-07-21 17:27:56	2022-07-21 17:27:56	MN	CST	2022-07-21 11:27:56	6090	07/21/2022	11:27	2400.9	2419.9	2185.82	2166.39	0.00888799	209.586	29.4691	180.117	8.97732	11.7518	4.39687	8.64718	5.9	1	1	0.0379	适合作为反演案例

## Sheet: 排放设施信息
State	Facility Name	Facility ID	Longitude	Latitude	Altitude	Zone	检索表达式	Google检索表达式
ND	Antelope Valley	6469	-101.834	47.3714	590	CST	POINT(-101.8344 47.3714)	47.3714,-101.8344
CO	Craig	6021	-107.591	40.4627	1939	MST	POINT(-107.5912 40.4627)	40.4627,-107.5912
NM	Four Corners Steam Elec Station	2442	-108.481	36.69	1630	MST	POINT(-108.4814 36.69)	36.69,-108.4814
TN	Gallatin	3403	-86.4006	36.3156	140	CST	POINT(-86.4006 36.3156)	36.3156,-86.4006
NE	Gerald Gentleman Station	6077	-101.141	41.0808	948	CST	POINT(-101.1408 41.0808)	41.0808,-101.1408
TX	Harrington Station	6193	-101.748	35.2972	1090	CST	POINT(-101.7475 35.2972)	35.2972,-101.7475
WV	Harrison Power Station	3944	-80.3325	39.3844	299	EST	POINT(-80.3325 39.3844)	39.3844,-80.3325
UT	Hunter	6165	-111.029	39.1747	1725	MST	POINT(-111.0289 39.1747)	39.1747,-111.0289
TX	J K Spruce	7097	-98.3205	29.3091	149	CST	POINT(-98.3205 29.3091)	29.3091,-98.3205
WY	Jim Bridger	8066	-108.787	41.7378	2044	MST	POINT(-108.7875 41.7378)	41.7378,-108.7875
KS	La Cygne	1241	-94.6467	38.3472	263	CST	POINT(-94.6467059 38.347189)	38.347189,-94.6467059
MO	Labadie	2103	-90.8361	38.5583	146	CST	POINT(-90.8361 38.5583)	38.5583,-90.8361
WY	Laramie River	6204	-104.883	42.1103	1393	MST	POINT(-104.8828 42.1103)	42.1103,-104.8828
TX	Martin Lake	6146	-94.5703	32.2597	98	CST	POINT(-94.5703 32.2597)	32.2597,-94.5703
TX	Oak Grove	6180	-96.4853	31.185	129	CST	POINT(-96.4853 31.185)	31.185,-96.4853
TX	Sam Seymour	6179	-96.7506	29.9172	115	CST	POINT(-96.7506 29.9172)	29.9172,-96.7506
KY	Shawnee	1379	-88.775	37.1517	105	CST	POINT(-88.775 37.1517)	37.1517,-88.775
MN	Sherburne County	6090	-93.8958	45.3792	292	CST	POINT(-93.8958 45.3792)	45.3792,-93.8958
KY	Trimble County	6071	-85.4117	38.5847	144	EST	POINT(-85.4117 38.5847)	38.5847,-85.4117
AR	White Bluff	6009	-92.1392	34.4236	93	CST	POINT(-92.1392 34.4236)	34.4236,-92.1392

## Sheet: 2024.12
id	filename	foldername	facility	type	Latitude	Longitude	satellite	date	Time of Satellite	UTC	State	Zone	Local Standard Time	Facility ID	day LST	time	前整点Q	后整点Q	avg Q(ton/h)	反演结果	反演误差	不确定度	IME_u (t/h)	Wind_u (t/h)	MF_u (ppm)	q	diff_dir	phi	风速	提取	排放	背景	备注
1	GF5_AHSI_W107.84_N40.19_20190803_006569_L10000052859	Craig_20190802	Craig		40.4627	-107.591	GF5	20190803	2019-08-03 04:08:09	2019-08-02 20:08:09	CO	MST	2019-08-02 13:08:09	6021	08/02/2019	13:08	1356.3	1381	1233.4	1275.64	0.0342429	210.752	24.9369	185.815	10.4771	8.68304	0.340904	0.370449	3.26	1	1	0.0714101
2	GF5_AHSI_W111.09_N39.21_20191118_008126_L10000065664	Hunter_20191118	Hunter		39.1747	-111.029	GF5	20191118	2019-11-18 04:20:29	2019-11-17 20:20:29	UT	MST	2019-11-17 13:20:29	6165	11/17/2019	13:20	889	885.7	805.489	365.216	0.546591	202.639	8.34009	194.299	11.5013	4.29928	167.712	50.8727	0.91	-1	0.5	0.0354438
3	GF5_AHSI_W85.14_N38.72_20191225_008664_L10000068784	Trimble County_20191225	Trimble County		38.5847	-85.4117	GF5	20191225	2019-12-25 02:36:43	2019-12-24 18:36:43	KY	EST	2019-12-24 13:36:43	6071	12/24/2019	13:36	1037.4	1080.8	964.737	926.386	0.0397523	455.367	13.5155	441.851	13.6034	6.05125	71.5397	25.2774	1.06	1	1	0.0337625
4	GF5A_AHSI_W108.6_N36.7_20231227_005597_L10000078715	Four Corners Steam Elec Station_20231227	Four Corners Steam Elec Station		36.69	-108.481	GF5A	20231227	2023-12-27 20:12:59	2023-12-27 20:12:59	NM	MST	2023-12-27 13:12:59	2442	12/27/2023	13:12	797	796.8	722.99	705.125	0.0247092	100.667	22.6333	78.0333	7.77355	3.36382	137.343	200.52	4.38	-1	0.7	0.0563688
5	GF5A_AHSI_W108.7_N41.7_20231213_005393_L10000074107	Jim Bridger_20231213	Jim Bridger		41.7378	-108.787	GF5A	20231213	2023-12-13 20:08:54	2023-12-13 20:08:54	WY	MST	2023-12-13 13:08:54	8066	12/13/2023	13:08	1825.9	1677	1638.42	1035.07	0.368251	162.663	38.6206	124.042	15.3235	4.13556	75.8957	101.194	4	1	1	0.038825
6	GF5A_AHSI_W108.8_N41.7_20230923_004213_L10000054221	Jim Bridger_20230923	Jim Bridger		41.7378	-108.787	GF5A	20230923	2023-09-23 20:11:46	2023-09-23 20:11:46	WY	MST	2023-09-23 13:11:46	8066	09/23/2023	13:11	460.9	452.2	416.674	297.889	0.285079	32.3516	0	0	0	0	0	0	7.1	-1	0	0.0350562
7	GF5A_AHSI_W94.3_N32.3_20230908_003994_L10000051261	Martin Lake_20230908	Martin Lake		32.2597	-94.5703	GF5A	20230908	2023-09-08 19:22:37	2023-09-08 19:22:37	TX	CST	2023-09-08 13:22:37	6146	09/08/2023	13:22	2712.1	2709.3	2459.44	2593.78	0.0546195	374.401	20.278	354.123	6.63984	11.4244	20.9875	24.3455	3.48	1	1	0.0512125	有羽流、但周围水汽干扰也很大
8	GF5A_AHSI_W98.5_N29.3_20230814_003630_L10000044804	J K Spruce_20230814	J K Spruce		29.3091	-98.3205	GF5A	20230814	2023-08-14 19:42:15	2023-08-14 19:42:15	TX	CST	2023-08-14 13:42:15	7097	08/14/2023	13:42	1389.2	1408.7	1272.64	1105.93	0.130996	370.207	9.22849	360.978	4.9311	11.3693	20.1245	11.4039	1.7	1	1	0.0232187	完美
9	GF5B_AHSI_W100.9_N41.2_20220628_004292_L10000156032	Gerald Gentleman Station_20220628	Gerald Gentleman Station		41.0808	-101.141	GF5B	20220628	2022-06-29 01:41:40	2022-06-28 17:41:40	NE	CST	2022-06-28 11:41:40	6077	06/28/2022	11:41	1314.5	1320.1	1195.97	300.691	0.748579	84.7438	7.05849	77.6854	3.86634	16.9299	34.0683	22.7122	2	1	0.5	0.0267562	24波段可见排放，有排放，但是算不准，靠近湖边
10	GF5B_AHSI_W101.1_N41.2_20211220_001524_L10000044164	Gerald Gentleman Station_20211220	Gerald Gentleman Station		41.0808	-101.141	GF5B	20211220	2021-12-21 01:37:21	2021-12-20 17:37:21	NE	CST	2021-12-20 11:37:21	6077	12/20/2021	11:37	1201.3	1283	1135.51	1002.09	0.117494	136.824	19.8608	116.963	7.09825	4.20738	1.41633	1.94509	4.12	1	1	0.0156687
11	GF5B_AHSI_W101.6_N47.5_20220619_004161_L10000151101	Antelope Valley_20220619	Antelope Valley		47.371	-101.836	GF5B	20220619	2022-06-20 01:51:31	2022-06-19 17:51:31	ND	CST	2022-06-19 11:51:31	6469	06/19/2022	11:51	522.7	565.6	507.266	652.096	0.28551	91.0587	20.9246	70.1341	6.47374	7.75621	67.4867	101.905	4.53	-1	1	0.0848688
12	GF5B_AHSI_W101.9_N35.3_20220424_003345_L10000118254	Harrington Station_20220424	Harrington Station		35.2972	-101.748	GF5B	20220424	2022-04-25 01:38:35	2022-04-24 17:38:35	TX	CST	2022-04-24 11:38:35	6193	04/24/2022	11:38	296.2	292.8	266.755	97.287	0.635294	20.0235	12.2075	7.81592	3.19868	2.69457	107.058	237.669	6.66	-1	0	0.0456625
13	GF5B_AHSI_W102.0_N47.5_20220316_002777_L10000118963	Antelope Valley_20220316	Antelope Valley		47.371	-101.836	GF5B	20220316	2022-03-17 01:50:55	2022-03-16 17:50:55	ND	CST	2022-03-16 11:50:55	6469	03/16/2022	11:50	560.6	524.1	480.974	1073.45	1.23183	110.344	39.792	70.552	10.0877	9.33737	7.25622	22.204	9.18	-1	0	0.0401063
14	GF5B_AHSI_W102.1_N47.5_20220626_004263_L10000154923	Antelope Valley_20220626	Antelope Valley		47.371	-101.836	GF5B	20220626	2022-06-27 01:53:27	2022-06-26 17:53:27	ND	CST	2022-06-26 11:53:27	6469	06/26/2022	11:53	667	827.8	733.949	751.323	0.0236718	95.3512	34.554	60.7972	8.83823	3.51938	59.1577	129.95	6.59	1	1	0.0697312	能看见一点
15	GF5B_AHSI_W107.5_N40.2_20230926_010921_L10000396892	Craig_20230926	Craig		40.4627	-107.591	GF5B	20230926	2023-09-27 02:12:39	2023-09-26 18:12:39	CO	MST	2023-09-26 11:12:39	6021	09/26/2023	11:12	761.2	909.1	717.384	642.879	0.103856	306.697	7.87469	298.822	8.00757	6.92691	16.2364	5.95333	1.1	-1	0.7	0.0507563
16	GF5B_AHSI_W107.8_N40.7_20221018_005924_L10000222668	Craig_20221018	Craig		40.4627	-107.591	GF5B	20221018	2022-10-19 02:11:02	2022-10-18 18:11:02	CO	MST	2022-10-18 11:11:02	6021	10/18/2022	11:11	830.6	831.6	753.674	772.348	0.0247779	277.7	8.67347	269.027	6.31122	6.12691	17.7787	9.65977	1.63	1	1	0.0539313	两个源
17	GF5B_AHSI_W108.2_N36.7_20220610_004030_L10000145798	Four Corners Steam Elec Station_20220610	Four Corners Steam Elec Station		36.69	-108.481	GF5B	20220610	2022-06-11 02:06:07	2022-06-10 18:06:07	NM	MST	2022-06-10 11:06:07	2442	06/10/2022	11:06	1471.5	1052.86	1296.94	1013.26	0.218734	172.111	9.52519	162.586	4.03232	12.6047	1.46785	1.45317	2.97	1	1	0.070375	完美
18	GF5B_AHSI_W108.3_N36.7_20220420_003287_L10000117219	Four Corners Steam Elec Station_20220420	Four Corners Steam Elec Station		36.69	-108.481	GF5B	20220420	2022-04-21 02:05:10	2022-04-20 18:05:10	NM	MST	2022-04-20 11:05:10	2442	04/20/2022	11:05	539.3	621.1	495.429	232.696	0.530313	56.6233	6.4982	50.1251	3.34818	3.89354	126.118	96.6902	2.3	-1	0.7	0.0579875	有排放
19	GF5B_AHSI_W108.3_N36.7_20240106_012407_L10000448627	Four Corners Steam Elec Station_20240106	Four Corners Steam Elec Station		36.69	-108.481	GF5B	20240106	2024-01-07 02:12:33	2024-01-06 18:12:33	NM	MST	2024-01-06 11:12:33	2442	01/06/2024	11:12	1357.4	1191	1201.22	622.694	0.481616	275.633	19.5927	256.04	17.8938	6.63405	4.05297	1.78331	1.32	1	1	0.0705687
20	GF5B_AHSI_W108.8_N41.7_20220212_002311_L10000077220	Jim Bridger_20220212	Jim Bridger		41.7378	-108.787	GF5B	20220212	2022-02-13 02:10:06	2022-02-12 18:10:06	WY	MST	2022-02-12 11:10:06	8066	02/12/2022	11:10	580.1	545	520.951	699.748	0.343213	91.2137	15.3905	75.8232	5.48563	5.46019	53.5068	80.0819	4.49	1	1	0.03575	有排放，但周围噪声明显更大，不适合反演
21	GF5B_AHSI_W109.0_N41.6_20231031_011431_L10000413197	Jim Bridger_20231031	Jim Bridger		41.7378	-108.787	GF5B	20231031	2023-11-01 02:20:04	2023-10-31 18:20:04	WY	MST	2023-10-31 11:20:04	8066	10/31/2023	11:20	1208.8	1174.8	1086.32	1144	0.0530966	116.315	17.5595	98.7552	5.41513	6.18243	40.5408	81.2168	6.01	-1	1	0.0392938
22	GF5B_AHSI_W109.1_N41.6_20231221_012174_L10000440228	Jim Bridger_20231221	Jim Bridger		41.7378	-108.787	GF5B	20231221	2023-12-22 02:20:37	2023-12-21 18:20:37	WY	MST	2023-12-21 11:20:37	8066	12/21/2023	11:20	994.7	868	864.063	749.324	0.13279	139.266	27.3206	111.945	12.3466	4.14199	111.095	117.761	3.18	1	0.7	0.0367
23	GF5B_AHSI_W110.9_N39.2_20220418_003258_L10000114473	Hunter_20220418	Hunter		39.1747	-111.029	GF5B	20220418	2022-04-19 02:17:59	2022-04-18 18:17:59	UT	MST	2022-04-18 11:17:59	6165	04/18/2022	11:17	909.6	899.7	822.631	133.406	0.83783	100.062	2.27514	97.7865	4.2188	9.42285	10.4024	2.08048	0.6	1	-1	0.0220063	低风速
24	GF5B_AHSI_W110.9_N39.2_20240104_012378_L10000447404	Hunter_20240104	Hunter		39.1747	-111.029	GF5B	20240104	2024-01-05 02:25:25	2024-01-04 18:25:25	UT	MST	2024-01-04 11:25:25	6165	01/04/2024	11:25	353.2	352.6	320.191	267.579	0.164312	202.337	6.20152	196.136	11.9889	5.13519	145.343	29.0687	0.6	1	0.7	0.0627875
25	GF5B_AHSI_W80.4_N39.2_20231012_011153_L10000404427	Harrison Power Station_20231012	Harrison Power Station		39.3844	-80.3325	GF5B	20231012	2023-10-13 00:23:33	2023-10-12 16:23:33	WV	EST	2023-10-12 11:23:33	3944	10/12/2023	11:23	229.9	228.3	208.005	232.887	0.119621	155.776	9.53922	146.237	13.6651	7.0499	83.2661	20.2614	0.73	-1	0.5	0.0490937	伪排放
26	GF5B_AHSI_W85.2_N38.7_20231031_011430_L10000413176	Trimble County_20231031	Trimble County		38.5847	-85.4117	GF5B	20231031	2023-11-01 00:42:01	2023-10-31 16:42:01	KY	EST	2023-10-31 11:42:01	6071	10/31/2023	11:42	278.2	284.99	256.691	1221.28	3.75781	217.741	36.4535	181.287	12.6572	4.60675	14.8945	15.8875	3.2	-1	0.5	0.0450687	探测到了，但算的不准（该案例说明GF5的探测下限达到256t/h, 3m/s）
27	GF5B_AHSI_W85.3_N38.7_20230714_009842_L10000360353	Trimble County_20230714	Trimble County		38.5847	-85.4117	GF5B	20230714	2023-07-15 00:42:09	2023-07-14 16:42:09	KY	EST	2023-07-14 11:42:09	6071	07/14/2023	11:42	1373.5	1399.05	1262.24	1355.58	0.0739414	546.085	17.5931	528.492	11.1145	8.86538	17.3389	8.78506	1.52	1	1	0.05525
28	GF5B_AHSI_W88.6_N37.1_20231212_012042_L10000435322	Shawnee_20231212	Shawnee		37.1517	-88.775	GF5B	20231212	2023-12-13 00:54:21	2023-12-12 16:54:21	KY	CST	2023-12-12 10:54:21	1379	12/12/2023	10:54	943.299	928	843.255	1183.51	0.403497	382.04	18.433	363.607	10.3499	5.19579	72.1762	42.5839	1.77	1	0.5	0.0495688	羽流飘到了水面上，水汽干扰大
29	GF5B_AHSI_W88.6_N37.2_20220326_002922_L10000100107	Shawnee_20220326	Shawnee		37.1517	-88.775	GF5B	20220326	2022-03-27 00:46:28	2022-03-26 16:46:28	KY	CST	2022-03-26 10:46:28	1379	03/26/2022	10:46	811.401	780.998	714.945	670.614	0.0620056	87.6363	26.7489	60.8874	6.62806	4.42923	174.456	326.233	5.61	-1	0.5	0.042425	羽流飘到了水面上，水汽干扰大
30	GF5B_AHSI_W88.7_N37.2_20230825_010454_L10000380643	Shawnee_20230825	Shawnee		37.1517	-88.775	GF5B	20230825	2023-08-26 00:54:41	2023-08-25 16:54:41	KY	CST	2023-08-25 10:54:41	1379	08/25/2023	10:54	1266.6	1261.2	1144.63	996.715	0.129228	209.449	24.8957	184.553	9.9821	5.79251	11.7856	10.2535	2.61	1	1	0.0576313	有排放，圆形，无羽流形状
31	GF5B_AHSI_W92.2_N34.3_20231006_011066_L10000401605	White Bluff_20231006	White Bluff		34.4236	-92.1392	GF5B	20231006	2023-10-07 01:05:59	2023-10-06 17:05:59	AR	CST	2023-10-06 11:05:59	6009	10/06/2023	11:05	320	380.1	294.843	645.46	1.18917	145.308	34.8975	110.411	15.1686	5.09483	60.6134	56.5725	2.8	-1	0.5	0.0541563
32	GF5B_AHSI_W94.2_N45.6_20220602_003913_L10000141558	Sherburne County_20220602	Sherburne County		45.3792	-93.8958	GF5B	20220602	2022-06-03 01:19:01	2022-06-02 17:19:01	MN	CST	2022-06-02 11:19:01	6090	06/02/2022	11:19	411.9	411.2	373.468	630.636	0.688593	88.0789	23.6395	64.4394	6.84508	4.11651	13.259	21.3029	4.82	-1	0.7	0.0176625
33	GF5B_AHSI_W94.3_N32.3_20231103_011474_L10000414550	Martin Lake_20231103	Martin Lake		32.2597	-94.5703	GF5B	20231103	2023-11-04 01:12:54	2023-11-03 17:12:54	TX	CST	2023-11-03 11:12:54	6146	11/03/2023	11:12	1488.1	1487.9	1349.95	1692.31	0.253615	384.042	27.1952	356.847	12.3174	6.03126	43.4873	33.9201	2.34	-1	1	0.0430938	有羽流，水面噪声大
34	GF5B_AHSI_W94.5_N32.3_20220407_003097_L10000107611	Martin Lake_20220407	Martin Lake		32.2597	-94.5703	GF5B	20220407	2022-04-08 01:05:50	2022-04-07 17:05:50	TX	CST	2022-04-07 11:05:50	6146	04/07/2022	11:05	1469.4	1514	1336.39	674.393	0.495362	84.5231	27.3232	57.1999	7.10346	7.37089	36.4565	74.8574	6.16	1	0.5	0.0477
35	GF5B_AHSI_W94.5_N38.2_20221019_005938_L10000223276	La Cygne_20221019	La Cygne		38.3472	-94.6467	GF5B	20221019	2022-10-20 01:15:33	2022-10-19 17:15:33	KS	CST	2022-10-19 11:15:33	1241	10/19/2022	11:15	708.8	713.2	644.01	553.267	0.140904	117.502	14.6037	102.898	5.71005	6.1263	157.345	136.365	2.6	-1	0.7	0.0564438	32波段可见排放源
36	GF5B_AHSI_W96.5_N31.3_20221019_005938_L10000223290	Oak Grove_20221019	Oak Grove		31.185	-96.4853	GF5B	20221019	2022-10-20 01:17:28	2022-10-19 17:17:28	TX	CST	2022-10-19 11:17:28	6180	10/19/2022	11:17	1788.5	1803.2	1626.28	1548.93	0.0475589	595.197	10.4166	584.781	5.94808	19.165	2.96656	1.53272	1.55	1	1	0.0295312	有排放
37	GF5B_AHSI_W96.9_N29.8_20221019_005938_L10000223293	Sam Seymour_20221019	Sam Seymour		29.9172	-96.7506	GF5B	20221019	2022-10-20 01:17:53	2022-10-19 17:17:53	TX	CST	2022-10-19 11:17:53	6179	10/19/2022	11:17	964.3	979	878.577	1357.17	0.544734	261.618	10.3222	251.295	3.82084	6.73796	164.311	142.95	2.61	-1	0.7	0.0195875
38	ZY1E_AHSI_W101.24_N41.04_20230805_020428_L1A0000637084	Gerald Gentleman Station_20230805	Gerald Gentleman Station		41.0808	-101.141	ZY1E	20230805	2023-08-05 17:48:20	2023-08-05 17:48:20	NE	CST	2023-08-05 11:48:20	6077	08/05/2023	11:48	1358.5	1357.1	1231.39	1533.82	0.245599	165.676	33.4284	132.248	9.35563	5.6644	63.7204	127.866	6.02	-1	0.7	0.0280313
39	ZY1E_AHSI_W101.46_N35.28_20220305_012995_L1A0000414997	Harrington Station_20220305	Harrington Station		35.2972	-101.748	ZY1E	20220305	2022-03-05 17:52:24	2022-03-05 17:52:24	TX	CST	2022-03-05 11:52:24	6193	03/05/2022	11:52	167.2	177.3	159.622	808.979	4.06808	64.1378	15.4267	48.711	3.82618	4.98163	122.391	438.975	10.76	1	0	0.0384688	排放强度太低了，无法检测到
40	ZY1E_AHSI_W101.95_N35.28_20220331_013368_L1A0000427095	Harrington Station_20220331	Harrington Station		35.2972	-101.748	ZY1E	20220331	2022-03-31 17:54:08	2022-03-31 17:54:08	TX	CST	2022-03-31 11:54:08	6193	03/31/2022	11:54	641.9	638.7	579.709	604.156	0.04217	67.0406	9.60362	57.437	2.82949	7.31441	11.7654	20.7071	5.28	1	1	0.0459125
41	ZY1E_AHSI_W101.95_N47.64_20201123_006296_L1A0000193277	Antelope Valley_20201123	Antelope Valley		47.371	-101.836	ZY1E	20201123	2020-11-23 18:05:58	2020-11-23 18:05:58	ND	CST	2020-11-23 12:05:58	6469	11/23/2020	12:05	372.7	365.9	337.594	1748.72	4.17996	179.491	35.722	143.769	11.4914	8.68897	58.6143	125.825	6.44	1	0	0.0526625	这一景还是不太好反演
42	ZY1E_AHSI_W104.76_N41.92_20230917_021045_L1A0000655064	Laramie River_20230917	Laramie River		42.1103	-104.883	ZY1E	20230917	2023-09-17 18:02:08	2023-09-17 18:02:08	WY	MST	2023-09-17 11:02:08	6204	09/17/2023	11:02	1667.1	1881.6	1518.85	1523.98	0.00337354	140.169	29.6413	110.527	7.28854	4.1852	4.46415	11.5919	7.79	-1	0.7	0.0414187	羽流良好
43	ZY1E_AHSI_W104.93_N41.92_20230625_019840_L1A0000620580	Laramie River_20230625	Laramie River		42.1103	-104.883	ZY1E	20230625	2023-06-25 18:05:08	2023-06-25 18:05:08	WY	MST	2023-06-25 11:05:08	6204	06/25/2023	11:05	1043.4	1114.7	951.947	1041.59	0.0941639	217.738	16.8381	200.9	7.75722	12.8194	131.408	110.382	2.52	1	0.7	0.0652313	有排放
44	ZY1E_AHSI_W105.13_N42.36_20200825_005004_L1A0000136593	Laramie River_20200825	Laramie River		42.1103	-104.883	ZY1E	20200825	2020-08-25 18:10:51	2020-08-25 18:10:51	WY	MST	2020-08-25 11:10:51	6204	08/25/2020	11:10	520.3	520.5	472.038	515.95	0.0930255	88.3104	9.96162	78.3488	4.06271	7.91735	166.503	173.718	3.13	1	0.7	0.036375
45	ZY1E_AHSI_W107.47_N40.60_20231007_021332_L1A0000663395	Craig_20231007	Craig		40.4627	-107.591	ZY1E	20231007	2023-10-07 18:11:00	2023-10-07 18:11:00	CO	MST	2023-10-07 11:11:00	6021	10/07/2023	11:11	487.2	518.1	447.12	656.686	0.468704	274.214	9.37652	264.838	7.84729	3.96794	3.73454	1.69299	1.36	1	0.7	0.05565	有排放 不像羽流
46	ZY1E_AHSI_W107.63_N40.60_20230715_020127_L1A0000628485	Craig_20230715	Craig		40.4627	-107.591	ZY1E	20230715	2023-07-15 18:14:00	2023-07-15 18:14:00	CO	MST	2023-07-15 11:14:00	6021	07/15/2023	11:14	892.4	903.4	811.9	952.417	0.173071	174.639	12.36	162.279	5.52491	7.30098	174.366	163.323	2.81	-1	0.7	0.0320312	19波段较好
47	ZY1E_AHSI_W108.64_N36.61_20200917_005334_L1A0000154763	Four Corners Steam Elec Station_20200917	Four Corners Steam Elec Station		36.69	-108.481	ZY1E	20200917	2020-09-17 18:19:28	2020-09-17 18:19:28	NM	MST	2020-09-17 11:19:28	2442	09/17/2020	11:19	1507.6	1506	1367.21	858.119	0.372359	159.517	7.28369	152.233	3.28294	7.93946	47.2646	42.6957	2.71	1	1	0.0735313	羽流形状好
48	ZY1E_AHSI_W108.68_N41.92_20200911_005248_L1A0000148906	Jim Bridger_20200911	Jim Bridger		41.7378	-108.787	ZY1E	20200911	2020-09-11 18:24:53	2020-09-11 18:24:53	WY	MST	2020-09-11 11:24:53	8066	09/11/2020	11:24	1437.4	1314.4	1259.35	1352.99	0.0743528	121.187	17.1398	104.047	5.17439	5.89113	64.2902	152.368	7.11	-1	1	0.0567062	排放位置在山上，不像排放源
49	ZY1E_AHSI_W108.72_N36.61_20231007_021332_L1A0000663404	Four Corners Steam Elec Station_20231007	Four Corners Steam Elec Station		36.69	-108.481	ZY1E	20231007	2023-10-07 18:12:07	2023-10-07 18:12:07	NM	MST	2023-10-07 11:12:07	2442	10/07/2023	11:12	1532.3	1509.9	1386.01	875.727	0.368169	292.206	6.36713	285.839	4.06394	10.2258	16.4356	9.3135	1.7	1	1	0.0634563	羽流很完整，可以作为案例
50	ZY1E_AHSI_W108.78_N41.92_20200813_004832_L1A0000126505	Jim Bridger_20200813	Jim Bridger		41.7378	-108.787	ZY1E	20200813	2020-08-13 18:24:46	2020-08-13 18:24:46	WY	MST	2020-08-13 11:24:46	8066	08/13/2020	11:24	1902.1	1640.8	1630.74	647.743	0.602791	69.4326	8.98949	60.4431	2.89292	7.96739	28.5651	51.5124	5.41	-1	0.7	0.03605	羽流形状很好，不过怎么风速有点问题
51	ZY1E_AHSI_W111.21_N39.27_20201004_005578_L1A0000168618	Hunter_20201004	Hunter		39.1747	-111.029	ZY1E	20201004	2020-10-04 18:32:36	2020-10-04 18:32:36	UT	MST	2020-10-04 11:32:36	6165	10/04/2020	11:32	656	681.6	607.499	1002.94	0.650932	247.738	9.48377	238.254	5.22714	6.73968	55.4318	39.3566	2.13	1	1	0.0244812	完美
52	ZY1E_AHSI_W111.31_N39.27_20200905_005163_L1A0000144224	Hunter_20200905	Hunter		39.1747	-111.029	ZY1E	20200905	2020-09-05 18:32:32	2020-09-05 18:32:32	UT	MST	2020-09-05 11:32:32	6165	09/05/2020	11:32	1057.9	1295.6	1074.72	754.513	0.297943	215.837	8.10124	207.736	4.74944	7.61698	66.3399	42.2364	1.91	-1	0.7	0.0119375	有羽流
53	ZY1E_AHSI_W85.49_N38.38_20220327_013308_L1A0000425150	Trimble County_20220327	Trimble County		38.5847	-85.4117	ZY1E	20220327	2022-03-27 16:51:14	2022-03-27 16:51:14	KY	EST	2022-03-27 11:51:14	6071	03/27/2022	11:51	412.9	409.2	371.723	291.05	0.217027	59.6759	21.4202	38.2558	7.03208	3.92785	157.439	189.976	3.62	-1	0	0.0513625
54	ZY1E_AHSI_W86.17_N36.17_20220327_013308_L1A0000425155	Gallatin_20220327	Gallatin		36.3156	-86.4006	ZY1E	20220327	2022-03-27 16:51:51	2022-03-27 16:51:51	TN	CST	2022-03-27 10:51:51	3403	03/27/2022	10:51	307	306.4	278.043	199.182	0.283629	62.3026	23.1514	39.1512	9.62912	2.77519	109.894	90.8454	2.48	1	0	0.0322
55	ZY1E_AHSI_W86.59_N36.17_20221004_016048_L1A0000511602	Gallatin_20221004	Gallatin		36.3156	-86.4006	ZY1E	20221004	2022-10-04 16:51:33	2022-10-04 16:51:33	TN	CST	2022-10-04 10:51:33	3403	10/04/2022	10:51	758.6	764.3	692.586	885.581	0.278659	360.449	21.9899	338.46	13.8425	7.36626	123.453	60.9037	1.48	-1	0.7	0.0306937	像伪排放源
56	ZY1E_AHSI_W88.87_N37.06_20211128_011601_L1A0000371189	Shawnee_20211128	Shawnee		37.1517	-88.775	ZY1E	20211128	2021-11-28 17:03:59	2021-11-28 17:03:59	KY	CST	2021-11-28 11:03:59	1379	11/28/2021	11:03	406.4	406.4	368.68	464.253	0.259232	91.3928	28.5355	62.8573	10.7549	5.24539	172.657	202.009	3.51	-1	0.5	0.0546063	有排放
57	ZY1E_AHSI_W88.95_N37.06_20210119_007111_L1A0000229838	Shawnee_20210119	Shawnee		37.1517	-88.775	ZY1E	20210119	2021-01-19 17:02:53	2021-01-19 17:02:53	KY	CST	2021-01-19 11:02:53	1379	01/19/2021	11:02	868.501	669.401	781.87	834.872	0.0677887	327.041	18.3384	308.703	11.669	4.04656	121.412	63.5387	1.57	1	0.7	0.0230188	右下角伪排放源
58	ZY1E_AHSI_W89.08_N37.06_20201221_006696_L1A0000212411	Shawnee_20201221	Shawnee		37.1517	-88.775	ZY1E	20201221	2020-12-21 17:03:04	2020-12-21 17:03:04	KY	CST	2020-12-21 11:03:04	1379	12/21/2020	11:03	386.9	386.599	350.976	735.794	1.09642	101.225	40.7327	60.4923	12.1805	4.90056	62.4587	134.078	6.44	-1	0	0.0467062
59	ZY1E_AHSI_W90.79_N38.83_20210925_010683_L1A0000340283	Labadie_20210925	Labadie		38.5583	-90.8361	ZY1E	20210925	2021-09-25 17:13:23	2021-09-25 17:13:23	MO	CST	2021-09-25 11:13:23	2103	09/25/2021	11:13	1746.6	1732.6	1581.74	1683.52	0.0643468	306.283	33.1984	273.084	13.0243	6.76405	0.861715	0.844481	2.94	-1	1	0.0480438
60	ZY1E_AHSI_W90.90_N38.38_20220113_012261_L1A0000391512	Labadie_20220113	Labadie		38.5583	-90.8361	ZY1E	20220113	2022-01-13 17:13:19	2022-01-13 17:13:19	MO	CST	2022-01-13 11:13:19	2103	01/13/2022	11:13	1841.4	1849.6	1672.1	1513.31	0.0949654	506.308	25.2596	481.049	15.1399	4.45761	126.707	73.068	1.73	-1	0.7	0.0451375
61	ZY1E_AHSI_W90.98_N38.38_20230329_018573_L1A0000585856	Labadie_20230329	Labadie		38.5583	-90.8361	ZY1E	20230329	2023-03-29 17:07:56	2023-03-29 17:07:56	MO	CST	2023-03-29 11:07:56	2103	03/29/2023	11:07	2464.5	2453.2	2234.56	2043.98	0.0852885	761.121	13.0319	748.09	7.24797	6.80603	4.8803	2.57029	1.58	1	0.7	0.05215	羽流沿着江面规整陈列
62	ZY1E_AHSI_W91.94_N34.40_20220726_015044_L1A0000481359	White Bluff_20220726	White Bluff		34.4236	-92.1392	ZY1E	20220726	2022-07-26 17:12:13	2022-07-26 17:12:13	AR	CST	2022-07-26 11:12:13	6009	07/26/2022	11:12	1389.4	1742.2	1324.45	1075.96	0.187617	192.862	36.1327	156.73	14.0085	6.81422	117.565	127.754	3.26	-1	0.7	0.041225	微弱的排放
63	ZY1E_AHSI_W92.11_N34.40_20220113_012261_L1A0000391521	White Bluff_20220113	White Bluff		34.4236	-92.1392	ZY1E	20220113	2022-01-13 17:14:27	2022-01-13 17:14:27	AR	CST	2022-01-13 11:14:27	6009	01/13/2022	11:14	901.3	897.1	816.757	686.383	0.159624	181.18	31.7069	149.473	16.9114	7.73584	119.967	91.1747	2.28	-1	0.7	0.046875	没有排放
64	ZY1E_AHSI_W92.15_N34.40_20220309_013050_L1A0000416988	White Bluff_20220309	White Bluff		34.4236	-92.1392	ZY1E	20220309	2022-03-09 17:14:19	2022-03-09 17:14:19	AR	CST	2022-03-09 11:14:19	6009	03/09/2022	11:14	280.3	279.1	254.03	961.001	2.78302	188.467	25.9978	162.47	10.2224	6.61507	55.9681	52.7966	2.83	1	0.5	0.0205938	很多云，不适合反演
65	ZY1E_AHSI_W92.33_N34.40_20231104_021729_L1A0000674441	White Bluff_20231104	White Bluff		34.4236	-92.1392	ZY1E	20231104	2023-11-04 17:03:42	2023-11-04 17:03:42	AR	CST	2023-11-04 11:03:42	6009	11/04/2023	11:03	537.3	433.2	482.708	397.288	0.17696	234.637	14.2898	220.347	16.2348	5.26335	103.478	29.6637	0.86	1	0.7	0.0518187
66	ZY1E_AHSI_W93.56_N45.45_20220320_013210_L1A0000421897	Sherburne County_20220320	Sherburne County		45.3792	-93.8958	ZY1E	20220320	2022-03-20 17:31:14	2022-03-20 17:31:14	MN	CST	2022-03-20 11:31:14	6090	03/20/2022	11:31	1451.2	1311.2	1250.89	1302.53	0.0412848	385.911	27.293	358.618	14.667	5.73645	7.7909	4.9602	1.91	-1	0.7	0.0484
67	ZY1E_AHSI_W94.02_N45.45_20220927_015948_L1A0000508557	Sherburne County_20220927	Sherburne County		45.3792	-93.8958	ZY1E	20220927	2022-09-27 17:31:08	2022-09-27 17:31:08	MN	CST	2022-09-27 11:31:08	6090	09/27/2022	11:31	1052.9	1052.9	955.175	1406.01	0.471991	247.93	48.0476	199.883	18.0897	4.91084	29.3764	32.7058	3.34	-1	1	0.0461375	有羽流
68	ZY1E_AHSI_W94.33_N38.38_20211206_011716_L1A0000374910	La Cygne_20211206	La Cygne		38.3472	-94.6467	ZY1E	20211206	2021-12-06 17:27:03	2021-12-06 17:27:03	KS	CST	2021-12-06 11:27:03	1241	12/06/2021	11:27	365.5	442.9	363.173	506.763	0.395375	88.7808	36.6468	52.134	11.1523	5.30448	151.396	241.225	4.78	-1	0.5	0.0323063
69	ZY1E_AHSI_W94.40_N32.17_20210401_008144_L1A0000261751	Martin Lake_20210401	Martin Lake		32.2597	-94.5703	ZY1E	20210401	2021-04-01 17:20:59	2021-04-01 17:20:59	TX	CST	2021-04-01 11:20:59	6146	04/01/2021	11:20	1201.3	1170.4	1080.46	1073.3	0.00662678	192.854	25.986	166.868	9.57325	5.54464	168.968	172.348	3.06	-1	0.7	0.0494812	有羽流
70	ZY1E_AHSI_W94.44_N38.38_20210913_010511_L1A0000334632	La Cygne_20210913	La Cygne		38.3472	-94.6467	ZY1E	20210913	2021-09-13 17:27:32	2021-09-13 17:27:32	KS	CST	2021-09-13 11:27:32	1241	09/13/2021	11:27	662.6	671	604.53	700.786	0.159225	109.138	43.7458	65.3927	13.7385	6.01702	61.937	111.693	5.41	-1	0.5	0.057725
71	ZY1E_AHSI_W94.49_N38.38_20200711_004357_L1A0000107667	La Cygne_20200711	La Cygne		38.3472	-94.6467	ZY1E	20200711	2020-07-11 17:23:19	2020-07-11 17:23:19	KS	CST	2020-07-11 11:23:19	1241	07/11/2020	11:23	1601.4	1598	1451.58	1986.86	0.368755	381.425	30.4058	351.019	12.2299	13.12	12.8865	11.6837	2.72	1	1	0.05035	反演效果不好，只有一团排放；感觉有点像是把水汽也核算进去了，偏高很多；误差太大了
72	ZY1E_AHSI_W94.59_N32.17_20220303_012967_L1A0000414108	Martin Lake_20220303	Martin Lake		32.2597	-94.5703	ZY1E	20220303	2022-03-03 17:22:15	2022-03-03 17:22:15	TX	CST	2022-03-03 11:22:15	6146	03/03/2022	11:22	1866.9	1838.5	1684.18	565.812	0.664043	431.286	5.0346	426.251	8.04971	8.03748	20.2671	3.91831	0.58	-1	-1	0.03975	这一景本应该能够看到完美羽流的，但是羽流的方向刚好经过了湖面，导致出现一段非常大的异常高值
73	ZY1E_AHSI_W94.77_N32.17_20210104_006896_L1A0000221658	Martin Lake_20210104	Martin Lake		32.2597	-94.5703	ZY1E	20210104	2021-01-04 17:21:40	2021-01-04 17:21:40	TX	CST	2021-01-04 11:21:40	6146	01/04/2021	11:21	1286	1418.3	1208.65	1686.8	0.395609	472.541	24.5201	448.021	13.3132	4.71652	62.2498	40.6698	1.96	-1	0.5	0.0439937	水汽干扰大，几乎无反演结果
74	ZY1E_AHSI_W96.19_N31.29_20220130_012507_L1A0000399543	Oak Grove_20220130	Oak Grove		31.185	-96.4853	ZY1E	20220130	2022-01-30 17:28:05	2022-01-30 17:28:05	TX	CST	2022-01-30 11:28:05	6180	01/30/2022	11:28	1396	1398.9	1267.66	1100.82	0.131613	144.391	27.9249	116.466	8.46184	6.88818	84.3064	129.832	4.62	-1	1	0.0184687
75	ZY1E_AHSI_W96.23_N31.29_20220326_013296_L1A0000424559	Oak Grove_20220326	Oak Grove		31.185	-96.4853	ZY1E	20220326	2022-03-26 17:27:55	2022-03-26 17:27:55	TX	CST	2022-03-26 11:27:55	6180	03/26/2022	11:27	767.3	835.6	723.965	806.052	0.113385	135.125	19.1452	115.98	6.99494	7.44931	9.24383	10.1682	3.3	-1	0.7	0.0262437
76	ZY1E_AHSI_W96.26_N31.29_20201006_005607_L1A0000169633	Oak Grove_20201006	Oak Grove		31.185	-96.4853	ZY1E	20201006	2020-10-06 17:25:38	2020-10-06 17:25:38	TX	CST	2020-10-06 11:25:38	6180	10/06/2020	11:25	1874.4	1879.2	1702.24	1637.74	0.0378909	466.176	21.7845	444.391	11.9136	8.17607	3.7461	2.40999	1.93	-1	1	0.0396063	有排放，无羽流
77	ZY1E_AHSI_W96.28_N31.29_20210424_008474_L1A0000271419	Oak Grove_20210424	Oak Grove		31.185	-96.4853	ZY1E	20210424	2021-04-24 17:27:56	2021-04-24 17:27:56	TX	CST	2021-04-24 11:27:56	6180	04/24/2021	11:27	893.6	900.9	813.64	1392.18	0.711045	148.859	27.8077	121.051	8.06455	9.26433	170.62	338.397	5.95	-1	0.7	0.0302313	偏高
78	ZY1E_AHSI_W96.41_N31.29_20211206_011716_L1A0000374926	Oak Grove_20211206	Oak Grove		31.185	-96.4853	ZY1E	20211206	2021-12-06 17:29:06	2021-12-06 17:29:06	TX	CST	2021-12-06 11:29:06	6180	12/06/2021	11:29	1798.7	1790.1	1627.98	1688.68	0.0372857	170.968	48.1988	122.769	12.2681	6.47381	157.652	407.793	7.76	-1	0.7	0.02365	有一点点羽流
79	ZY1E_AHSI_W96.55_N29.95_20220130_012507_L1A0000399546	Sam Seymour_20220130	Sam Seymour		29.9172	-96.7506	ZY1E	20220130	2022-01-30 17:28:28	2022-01-30 17:28:28	TX	CST	2022-01-30 11:28:28	6179	01/30/2022	11:28	1394.8	1390.4	1263.48	1088.58	0.138427	204.588	20.5502	184.038	7.94178	7.86326	20.7301	19.5554	2.83	-1	0.7	0.0253875
80	ZY1E_AHSI_W96.58_N31.29_20200711_004359_L1A0000107694	Oak Grove_20200711	Oak Grove		31.185	-96.4853	ZY1E	20200711	2020-07-11 17:25:19	2020-07-11 17:25:19	TX	CST	2020-07-11 11:25:19	6180	07/11/2020	11:25	1869.6	1875.6	1698.34	1980.98	0.166421	313.09	24.5313	288.558	8.37221	14.05	0.822992	0.894318	3.26	1	1	0.0347312	羽流可以
81	ZY1E_AHSI_W96.59_N29.95_20220326_013296_L1A0000424562	Sam Seymour_20220326	Sam Seymour		29.9172	-96.7506	ZY1E	20220326	2022-03-26 17:28:17	2022-03-26 17:28:17	TX	CST	2022-03-26 11:28:17	6179	03/26/2022	11:28	1765.4	1773.9	1605.14	1617.15	0.0074827	214.828	20.1519	194.676	6.52971	10.7775	28.7973	38.2045	3.98	-1	1	0.0337312	能看到排放，但羽流飘到了湖面上
82	ZY1E_AHSI_W96.65_N29.95_20210424_008474_L1A0000271422	Sam Seymour_20210424	Sam Seymour		29.9172	-96.7506	ZY1E	20210424	2021-04-24 17:28:19	2021-04-24 17:28:19	TX	CST	2021-04-24 11:28:19	6179	04/24/2021	11:28	1037.5	1164.7	995.055	1189.39	0.195301	123.082	22.085	100.997	6.03597	6.11067	174.915	358.576	6.15	-1	0.7	0.0319313
83	ZY1E_AHSI_W96.74_N31.10_20200612_003941_L1A0000093912	Oak Grove_20200612	Oak Grove		31.185	-96.4853	ZY1E	20200612	2020-06-12 17:25:12	2020-06-12 17:25:12	TX	CST	2020-06-12 11:25:12	6180	06/12/2020	11:25	1759.1	1762.5	1597.11	1871.45	0.171767	251.049	26.7757	224.273	8.38532	12.5005	11.6369	15.5159	4	-1	1	0.045725	排放羽流很清晰
84	ZY1E_AHSI_W96.95_N29.95_20200711_004359_L1A0000107697	Sam Seymour_20200711	Sam Seymour		29.9172	-96.7506	ZY1E	20200711	2020-07-11 17:25:42	2020-07-11 17:25:42	TX	CST	2020-07-11 11:25:42	6179	07/11/2020	11:25	1793.1	1824.9	1638.69	1563.8	0.0457037	279.455	14.0446	265.41	5.37687	17.5655	37.0438	34.8212	2.82	-1	1	0.0252938	有羽流，还不错，飘到水面上了，前16波段清晰；作为强吸收和弱吸收的案例
85	ZY1E_AHSI_W97.05_N29.95_20200612_003941_L1A0000093915	Sam Seymour_20200612	Sam Seymour		29.9172	-96.7506	ZY1E	20200612	2020-06-12 17:25:31	2020-06-12 17:25:31	TX	CST	2020-06-12 11:25:31	6179	06/12/2020	11:25	1467.5	1562.8	1367.32	1768.94	0.293733	251.986	20.6892	231.297	6.50424	13.6044	7.27734	8.82984	3.64	-1	1	0.0372938	羽流形状很好，可以作为案例
86	ZY1E_AHSI_W98.07_N29.51_20220930_015991_L1A0000509878	J K Spruce_20220930	J K Spruce		29.3091	-98.3205	ZY1E	20220930	2022-09-30 17:31:53	2022-09-30 17:31:53	TX	CST	2022-09-30 11:31:53	7097	09/30/2022	11:31	1501.1	1499.5	1361.03	1199.12	0.118955	442.404	16.5079	425.896	9.56754	13.0787	45.2661	24.2928	1.61	-1	1	0.0220125	有噪声，有羽流
87	ZY1E_AHSI_W98.20_N29.06_20220418_013626_L1A0000435959	J K Spruce_20220418	J K Spruce		29.3091	-98.3205	ZY1E	20220418	2022-04-18 17:33:49	2022-04-18 17:33:49	TX	CST	2022-04-18 11:33:49	7097	04/18/2022	11:33	629.1	628.9	570.61	585.382	0.0258885	69.7953	21.6689	48.1264	5.59852	6.42429	177.477	380.983	6.44	-1	0.7	0.0283125
88	ZY1E_AHSI_W98.50_N29.51_20200930_005521_L1A0000170469	J K Spruce_20200930	J K Spruce		29.3091	-98.3205	ZY1E	20200930	2020-09-30 17:33:03	2020-09-30 17:33:03	TX	CST	2020-09-30 11:33:03	7097	09/30/2020	11:33	914.9	958.2	851.588	993.261	0.166363	167.329	18.9403	148.388	6.71303	8.25005	3.96023	4.19785	3.18	-1	1	0.026825
89	ZY1E_AHSI_W98.51_N29.06_20201029_005935_L1A0000194928	J K Spruce_20201029	J K Spruce		29.3091	-98.3205	ZY1E	20201029	2020-10-29 17:33:12	2020-10-29 17:33:12	TX	CST	2020-10-29 11:33:12	7097	10/29/2020	11:33	508.1	564.9	489.281	581.998	0.189496	71.2698	26.7591	44.5107	7.01755	4.51846	17.614	42.0974	7.17	1	0.7	0.020975	有团块排放
90	ZY1E_AHSI_W98.53_N29.51_20220514_013997_L1A0000447750	J K Spruce_20220514	J K Spruce		29.3091	-98.3205	ZY1E	20220514	2022-05-14 17:35:16	2022-05-14 17:35:16	TX	CST	2022-05-14 11:35:16	7097	05/14/2022	11:35	1041	1035.2	941.31	1544.21	0.640487	383.095	13.9949	369.1	6.39783	13.5781	23.9905	16.9533	2.12	1	1	0.0282438
91	ZY1F_AHSI_W101.04_N41.04_20230916_009032_L1A0000537816	Gerald Gentleman Station_20230916	Gerald Gentleman Station		41.0808	-101.141	ZY1F	20230916	2023-09-16 18:00:26	2023-09-16 18:00:26	NE	CST	2023-09-16 12:00:26	6077	09/16/2023	12:00	1330.8	1109.2	1207.28	1459.97	0.209307	194.761	18.2037	176.557	5.99831	16.5363	29.554	39.0113	3.96	1	0.7	0.0279187
92	ZY1F_AHSI_W101.05_N41.04_20231110_009821_L1A0000582861	Gerald Gentleman Station_20231110	Gerald Gentleman Station		41.0808	-101.141	ZY1F	20231110	2023-11-10 18:01:07	2023-11-10 18:01:07	NE	CST	2023-11-10 12:01:07	6077	11/10/2023	12:01	1304.1	1307.4	1183.11	1232.6	0.041833	139.906	15.2107	124.696	4.43714	5.77876	81.9168	133.251	4.88	-1	0.7	0.0120062
93	ZY1F_AHSI_W101.48_N41.04_20230624_007827_L1A0000469131	Gerald Gentleman Station_20230624	Gerald Gentleman Station		41.0808	-101.141	ZY1F	20230624	2023-06-24 18:00:53	2023-06-24 18:00:53	NE	CST	2023-06-24 12:00:53	6077	06/24/2023	12:00	688	687.2	624.143	571.811	0.0838457	57.7272	15.606	42.1213	3.95778	19.8253	30.8944	78.2659	7.6	-1	1	0.0293937	10波段效果好
94	ZY1F_AHSI_W104.83_N41.92_20230930_009233_L1A0000549577	Laramie River_20230930	Laramie River		42.1103	-104.883	ZY1F	20230930	2023-09-30 18:16:43	2023-09-30 18:16:43	WY	MST	2023-09-30 11:16:43	6204	09/30/2023	11:16	798.9	661.1	691.414	778.71	0.126257	122.206	13.4394	108.766	4.86888	6.61639	6.33714	7.18209	3.4	-1	1	0.0486813	有羽流
95	ZY1F_AHSI_W107.55_N40.59_20231020_009525_L1A0000564874	Craig_20231020	Craig		40.4627	-107.591	ZY1F	20231020	2023-10-20 18:26:24	2023-10-20 18:26:24	CO	MST	2023-10-20 11:26:24	6021	10/20/2023	11:26	729.3	742.5	666.799	35.358	0.946974	37.7288	2.87093	34.8579	7.55117	3.19209	154.3	21.602	0.42	-1	0.5	0.05525	22有一个羽流 24双羽流0.001
96	ZY1F_AHSI_W110.71_N39.27_20230817_008602_L1A0000512937	Hunter_20230817	Hunter		39.1747	-111.029	ZY1F	20230817	2023-08-17 18:36:51	2023-08-17 18:36:51	UT	MST	2023-08-17 11:36:51	6165	08/17/2023	11:36	654	651.7	592.047	687.146	0.160628	176.452	5.85472	170.597	3.24019	16.8571	123.284	84.655	2.06	1	0.7	0.00544375
97	ZY1F_AHSI_W110.73_N39.27_20230623_007813_L1A0000468861	Hunter_20230623	Hunter		39.1747	-111.029	ZY1F	20230623	2023-06-23 18:36:03	2023-06-23 18:36:03	UT	MST	2023-06-23 11:36:03	6165	06/23/2023	11:36	422.6	419.8	381.852	485.722	0.272015	53.6396	12.5838	41.0558	3.70425	3.75312	175.383	361.874	6.19	-1	0.7	0.0276563	有点不像
98	ZY1F_AHSI_W111.15_N39.27_20230719_008186_L1A0000490264	Hunter_20230719	Hunter		39.1747	-111.029	ZY1F	20230719	2023-07-19 18:38:10	2023-07-19 18:38:10	UT	MST	2023-07-19 11:38:10	6165	07/19/2023	11:38	656.412	749.552	649.001	151.541	0.766501	130.425	1.46359	128.961	3.2466	19.7428	62.1885	10.3647	0.5	1	-1	0.0160563	清晰完美
99	ZY1F_AHSI_W80.08_N39.27_20220621_002553_L1A0000190867	Harrison Power Station_20220621	Harrison Power Station		39.3844	-80.3325	ZY1F	20220621	2022-06-21 16:24:44	2022-06-21 16:24:44	WV	EST	2022-06-21 11:24:44	3944	06/21/2022	11:24	1900.6	2008.4	1763.31	1450.12	0.177617	324.662	17.2667	307.395	7.43445	13.6455	23.6876	18.3973	2.33	1	1	0.0527875	非常清晰
100	ZY1F_AHSI_W80.61_N39.27_20230418_006865_L1A0000414746	Harrison Power Station_20230418	Harrison Power Station		39.3844	-80.3325	ZY1F	20230418	2023-04-18 16:34:27	2023-04-18 16:34:27	WV	EST	2023-04-18 11:34:27	3944	04/18/2023	11:34	631.6	618	565.987	495.553	0.124443	62.2114	17.9198	44.2916	4.73119	5.29748	145.796	278.47	5.73	-1	0.7	0.0334438
101	ZY1F_AHSI_W86.57_N36.17_20230305_006234_L1A0000379047	Gallatin_20230305	Gallatin		36.3156	-86.4006	ZY1F	20230305	2023-03-05 16:54:32	2023-03-05 16:54:32	TN	CST	2023-03-05 10:54:32	3403	03/05/2023	10:54	278.3	276	250.592	350.731	0.399613	84.6261	16.3392	68.287	6.50755	3.31172	134.336	111.947	2.5	-1	0	0.034	无排放
102	ZY1F_AHSI_W88.63_N37.05_20231031_009677_L1A0000574307	Shawnee_20231031	Shawnee		37.1517	-88.775	ZY1F	20231031	2023-10-31 17:07:20	2023-10-31 17:07:20	KY	CST	2023-10-31 11:07:20	1379	10/31/2023	11:07	879.1	888.799	798.533	1463.34	0.832536	220.702	27.3406	193.361	9.27057	4.51709	99.2903	119.148	3.6	-1	0.5	0.0639375	羽流飘到了水面上，水汽干扰大
103	ZY1F_AHSI_W90.79_N38.83_20230704_007970_L1A0000476992	Labadie_20230704	Labadie		38.5583	-90.8361	ZY1F	20230704	2023-07-04 17:16:01	2023-07-04 17:16:01	MO	CST	2023-07-04 11:16:01	2103	07/04/2023	11:16	2560.7	2558.1	2322.4	2606.44	0.122305	553.26	23.0621	530.198	9.49041	17.4869	113.606	91.2632	2.41	1	0.7	0.0238063	构成羽流，有排放
104	ZY1F_AHSI_W90.93_N38.38_20231022_009549_L1A0000565683	Labadie_20231022	Labadie		38.5583	-90.8361	ZY1F	20231022	2023-10-22 17:17:43	2023-10-22 17:17:43	MO	CST	2023-10-22 11:17:43	2103	10/22/2023	11:17	2197.7	2194	1992.77	2016.96	0.0121401	573.82	22.5477	551.272	11.1118	6.55761	115.279	73.7783	1.92	-1	0.7	0.0542188	受江水影响较大
105	ZY1F_AHSI_W93.93_N45.45_20220721_002978_L1A0000173921	Sherburne County_20220721	Sherburne County		45.3792	-93.8958	ZY1F	20220721	2022-07-21 17:27:56	2022-07-21 17:27:56	MN	CST	2022-07-21 11:27:56	6090	07/21/2022	11:27	2400.9	2419.9	2185.82	2244.75	0.0269634	226.545	30.1639	196.381	7.95892	12.2217	3.11467	6.12552	5.9	1	1	0.0421313	适合作为反演案例
106	ZY1F_AHSI_W94.55_N32.17_20231210_010251_L1A0000608285	Martin Lake_20231210	Martin Lake		32.2597	-94.5703	ZY1F	20231210	2023-12-10 17:27:08	2023-12-10 17:27:08	TX	CST	2023-12-10 11:27:08	6146	12/10/2023	11:27	1027.6	1026.4	931.733	1001.33	0.0747012	133.92	31.0818	102.839	9.1209	8.18368	176.048	281.09	4.79	-1	0.7	0.0420188	有羽流
107	ZY1F_AHSI_W94.55_N38.38_20220920_003853_L1A0000229994	La Cygne_20220920	La Cygne		38.3472	-94.6467	ZY1F	20220920	2022-09-20 17:24:31	2022-09-20 17:24:31	KS	CST	2022-09-20 11:24:31	1241	09/20/2022	11:24	759.1	765.6	691.003	799.936	0.157646	102.499	23.2585	79.2406	6.56942	5.13389	151.757	253.434	5.01	-1	0.7	0.0344062	水汽影响太大了
108	ZY1F_AHSI_W94.56_N38.38_20230816_008587_L1A0000512042	La Cygne_20230816	La Cygne		38.3472	-94.6467	ZY1F	20230816	2023-08-16 17:31:23	2023-08-16 17:31:23	KS	CST	2023-08-16 11:31:23	1241	08/16/2023	11:31	1273.7	1441.1	1233.94	1002.18	0.187827	188.935	17.5051	171.43	6.88442	14.3251	137.353	128.196	2.8	1	0.7	0.050975	飘到湖面上了
109	ZY1F_AHSI_W94.57_N32.17_20220802_003150_L1A0000184740	Martin Lake_20220802	Martin Lake		32.2597	-94.5703	ZY1F	20220802	2022-08-02 17:17:29	2022-08-02 17:17:29	TX	CST	2022-08-02 11:17:29	6146	08/02/2022	11:17	2263.6	2623.6	2146.04	2287.43	0.0658858	346.227	25.7992	320.428	8.94962	9.86751	129.767	146.636	3.39	-1	0.7	0.0492125	有排放，圆形，堆叠状，飘到湖面上
110	ZY1F_AHSI_W94.58_N38.38_20230108_005431_L1A0000329362	La Cygne_20230108	La Cygne		38.3472	-94.6467	ZY1F	20230108	2023-01-08 17:27:27	2023-01-08 17:27:27	KS	CST	2023-01-08 11:27:27	1241	01/08/2023	11:27	1406.5	1398.2	1272.57	1093.95	0.14036	489.45	10.2996	479.15	8.69932	5.40822	29.6086	11.8434	1.2	1	0.7	0.0192812	噪声较大
111	ZY1F_AHSI_W94.61_N32.17_20221120_004728_L1A0000290523	Martin Lake_20221120	Martin Lake		32.2597	-94.5703	ZY1F	20221120	2022-11-20 17:20:45	2022-11-20 17:20:45	TX	CST	2022-11-20 11:20:45	6146	11/20/2022	11:20	2635.2	2664.4	2399.44	2442.43	0.0179158	426.666	34.7575	391.909	12.8112	7.37591	149.951	148.451	2.97	-1	0.7	0.0442188	有一点羽流比较稀疏
112	ZY1F_AHSI_W96.64_N31.29_20220727_003064_L1A0000178119	Oak Grove_20220727	Oak Grove		31.185	-96.4853	ZY1F	20220727	2022-07-27 17:24:51	2022-07-27 17:24:51	TX	CST	2022-07-27 11:24:51	6180	07/27/2022	11:24	1241	1493.7	1217.51	1153.68	0.0524317	159.287	14.0475	145.24	4.50394	11.6246	25.8781	32.6926	3.79	1	1	0.0274375
113	ZY1F_AHSI_W96.65_N31.29_20230304_006220_L1A0000378222	Oak Grove_20230304	Oak Grove		31.185	-96.4853	ZY1F	20230304	2023-03-04 17:30:35	2023-03-04 17:30:35	TX	CST	2023-03-04 11:30:35	6180	03/04/2023	11:30	650.4	654.3	591.802	631.343	0.0668143	96.4008	17.1133	79.2875	5.49711	7.6534	9.71045	12.2999	3.8	-1	1	0.03295	被云挡住了
114	ZY1F_AHSI_W96.65_N31.29_20230816_008587_L1A0000512058	Oak Grove_20230816	Oak Grove		31.185	-96.4853	ZY1F	20230816	2023-08-16 17:33:23	2023-08-16 17:33:23	TX	CST	2023-08-16 11:33:23	6180	08/16/2023	11:33	1820.5	1806.6	1644.59	2238.58	0.361174	428.477	12.1398	416.337	4.45274	23.7864	1.93802	1.67962	2.6	1	1	0.0249125	羽流很好，简直完美！！！适合作为案例
115	ZY1F_AHSI_W96.67_N31.29_20230108_005431_L1A0000329378	Oak Grove_20230108	Oak Grove		31.185	-96.4853	ZY1F	20230108	2023-01-08 17:29:27	2023-01-08 17:29:27	TX	CST	2023-01-08 11:29:27	6180	01/08/2023	11:29	1957.3	1974.5	1783.17	1621.75	0.0905292	199.664	20.8892	178.774	6.1419	8.72108	5.51504	8.08873	4.4	1	1	0.0265	有羽流，水池下方有一个点源
116	ZY1F_AHSI_W97.01_N29.95_20230304_006220_L1A0000378225	Sam Seymour_20230304	Sam Seymour		29.9172	-96.7506	ZY1F	20230304	2023-03-04 17:30:57	2023-03-04 17:30:57	TX	CST	2023-03-04 11:30:57	6179	03/04/2023	11:30	672.8	881.2	704.883	1403	0.990397	239.119	17.173	221.946	6.10635	8.72135	10.8963	10.9326	3.01	1	1	0.0317438
117	ZY1F_AHSI_W97.01_N29.95_20230816_008587_L1A0000512061	Sam Seymour_20230816	Sam Seymour		29.9172	-96.7506	ZY1F	20230816	2023-08-16 17:33:45	2023-08-16 17:33:45	TX	CST	2023-08-16 11:33:45	6179	08/16/2023	11:33	1354.8	1363.7	1233.49	1321.65	0.0714664	284.415	10.0453	274.369	3.96218	12.3322	5.35032	4.22675	2.37	1	1	0.0249875
118	ZY1F_AHSI_W98.47_N29.51_20221013_004183_L1A0000250381	J K Spruce_20221013	J K Spruce		29.3091	-98.3205	ZY1F	20221013	2022-10-13 17:33:02	2022-10-13 17:33:02	TX	CST	2022-10-13 11:33:02	7097	10/13/2022	11:33	1492.3	1495.9	1355.59	1889.53	0.393886	186.729	18.4947	168.234	4.72401	8.39757	62.8481	120.668	5.76	-1	0.7	0.025625	噪声较大

## Sheet: 按设施统计1223
行标签	平均值项:Facility ID	平均值项:反演结果	平均值项:反演误差	平均值项:不确定度
Antelope Valley	6469	1056.4	1.43024	119.061
Craig	6021	722.554	0.291938	213.622
Four Corners Steam Elec Station	2442	717.937	0.33265	176.126
Gallatin	3403	478.498	0.320634	169.126
Gerald Gentleman Station	6077	1016.83	0.241109	129.94
Harrington Station	6193	503.474	1.58185	50.4006
Harrison Power Station	3944	726.187	0.14056	180.883
Hunter	6165	481.008	0.462094	166.141
J K Spruce	7097	1128.49	0.23801	241.547
Jim Bridger	8066	846.681	0.265653	104.633
La Cygne	1241	949.105	0.221442	211.104
Labadie	2103	1972.84	0.0758091	540.159
Laramie River	6204	965.056	0.079205	142.106
Martin Lake	6146	1557.51	0.225375	316.273
Oak Grove	6180	1472.68	0.16566	259.057
Sam Seymour	6179	1413.71	0.285906	232.386
Shawnee	1379	907.014	0.407244	202.784
Sherburne County	6090	1395.98	0.307208	237.116
Trimble County	6071	948.574	1.02213	319.717
White Bluff	6009	753.219	0.899278	188.491
总计	5258.16	1056.18	0.385429	217.783

## Sheet: 2024.11
序号	filename	foldername	Facility Name	Latitude	Longitude	satellite	date	Time of Satellite	UTC	State	Zone	Local Standard Time	Facility ID	day LST	time	前整点Q	后整点Q	avg Q(ton/h)	反演结果	反演误差	不确定度	风速	提取	排放	背景	备注
1	GF5_AHSI_W107.84_N40.19_20190803_006569_L10000052859	Craig_20190802	Craig	40.4627	-107.591	GF5	20190803	2019-08-03 04:08:09	2019-08-02 20:08:09	CO	MST	2019-08-02 13:08:09	6021	08/02/2019	13:08	1356.3	1381	1233.4	1275.64	0.0342429	198.052	3.26	1	1	0.0706335
2	GF5_AHSI_W111.09_N39.21_20191118_008126_L10000065664	Hunter_20191118	Hunter	39.1747	-111.029	GF5	20191118	2019-11-18 04:20:29	2019-11-17 20:20:29	UT	MST	2019-11-17 13:20:29	6165	11/17/2019	13:20	889	885.7	805.489	365.216	0.546591	198.291	0.91	-1	0.5	0.023275
3	GF5_AHSI_W85.14_N38.72_20191225_008664_L10000068784	Trimble County_20191225	Trimble County	38.5847	-85.4117	GF5	20191225	2019-12-25 02:36:43	2019-12-24 18:36:43	KY	EST	2019-12-24 13:36:43	6071	12/24/2019	13:36	1037.4	1080.8	964.737	926.386	0.0397523	449.106	1.06	1	1	0.0318812
4	GF5A_AHSI_W108.6_N36.7_20231227_005597_L10000078715	Four Corners Steam Elec Station_20231227	Four Corners Steam Elec Station	36.69	-108.481	GF5A	20231227	2023-12-27 20:12:59	2023-12-27 20:12:59	NM	MST	2023-12-27 13:12:59	2442	12/27/2023	13:12	797	796.8	722.99	705.125	0.0247092	88.8947	4.38	-1	0.7	0.0536812
5	GF5A_AHSI_W108.7_N41.7_20231213_005393_L10000074107	Jim Bridger_20231213	Jim Bridger	41.7378	-108.787	GF5A	20231213	2023-12-13 20:08:54	2023-12-13 20:08:54	WY	MST	2023-12-13 13:08:54	8066	12/13/2023	13:08	1825.9	1677	1638.42	1035.07	0.368251	143.675	4	1	1	0.0365062
6	GF5A_AHSI_W108.8_N41.7_20230923_004213_L10000054221	Jim Bridger_20230923	Jim Bridger	41.7378	-108.787	GF5A	20230923	2023-09-23 20:11:46	2023-09-23 20:11:46	WY	MST	2023-09-23 13:11:46	8066	09/23/2023	13:11	460.9	452.2	416.674	297.889	0.285079	28.6958	7.1	-1	0	0.0322812
7	GF5A_AHSI_W94.3_N32.3_20230908_003994_L10000051261	Martin Lake_20230908	Martin Lake	32.2597	-94.5703	GF5A	20230908	2023-09-08 19:22:37	2023-09-08 19:22:37	TX	CST	2023-09-08 13:22:37	6146	09/08/2023	13:22	2712.1	2709.3	2459.44	2593.78	0.0546195	365.259	3.48	1	1	0.0497125	有羽流、但周围水汽干扰也很大
8	GF5A_AHSI_W98.5_N29.3_20230814_003630_L10000044804	J K Spruce_20230814	J K Spruce	29.3091	-98.3205	GF5A	20230814	2023-08-14 19:42:15	2023-08-14 19:42:15	TX	CST	2023-08-14 13:42:15	7097	08/14/2023	13:42	1389.2	1408.7	1272.64	1105.93	0.130996	366.309	1.7	1	1	0.0162	完美
9	GF5B_AHSI_W100.9_N41.2_20220628_004292_L10000156032	Gerald Gentleman Station_20220628	Gerald Gentleman Station	41.0808	-101.141	GF5B	20220628	2022-06-29 01:41:40	2022-06-28 17:41:40	NE	CST	2022-06-28 11:41:40	6077	06/28/2022	11:41	1314.5	1320.1	1195.97	300.691	0.748579	81.2901	2	1	0.5	0.0238438	24波段可见排放，有排放，但是算不准，靠近湖边
10	GF5B_AHSI_W101.1_N41.2_20211220_001524_L10000044164	Gerald Gentleman Station_20211220	Gerald Gentleman Station	41.0808	-101.141	GF5B	20211220	2021-12-21 01:37:21	2021-12-20 17:37:21	NE	CST	2021-12-20 11:37:21	6077	12/20/2021	11:37	1201.3	1283	1135.51	1002.09	0.117494	127.244	4.12	1	1	0.00629375
11	GF5B_AHSI_W101.6_N47.5_20220619_004161_L10000151101	Antelope Valley_20220619	Antelope Valley	47.371	-101.836	GF5B	20220619	2022-06-20 01:51:31	2022-06-19 17:51:31	ND	CST	2022-06-19 11:51:31	6469	06/19/2022	11:51	522.7	565.6	507.266	652.096	0.28551	80.3603	4.53	-1	1	0.0829125
12	GF5B_AHSI_W101.9_N35.3_20220424_003345_L10000118254	Harrington Station_20220424	Harrington Station	35.2972	-101.748	GF5B	20220424	2022-04-25 01:38:35	2022-04-24 17:38:35	TX	CST	2022-04-24 11:38:35	6193	04/24/2022	11:38	296.2	292.8	266.755	97.287	0.635294	13.8912	6.66	-1	0	0.0359937
13	GF5B_AHSI_W102.0_N47.5_20220316_002777_L10000118963	Antelope Valley_20220316	Antelope Valley	47.371	-101.836	GF5B	20220316	2022-03-17 01:50:55	2022-03-16 17:50:55	ND	CST	2022-03-16 11:50:55	6469	03/16/2022	11:50	560.6	524.1	480.974	1073.45	1.23183	90.6876	9.18	-1	0	0.0319938
14	GF5B_AHSI_W102.1_N47.5_20220626_004263_L10000154923	Antelope Valley_20220626	Antelope Valley	47.371	-101.836	GF5B	20220626	2022-06-27 01:53:27	2022-06-26 17:53:27	ND	CST	2022-06-26 11:53:27	6469	06/26/2022	11:53	667	827.8	733.949	751.323	0.0236718	78.0155	6.59	1	1	0.0618063	能看见一点
15	GF5B_AHSI_W107.5_N40.2_20230926_010921_L10000396892	Craig_20230926	Craig	40.4627	-107.591	GF5B	20230926	2023-09-27 02:12:39	2023-09-26 18:12:39	CO	MST	2023-09-26 11:12:39	6021	09/26/2023	11:12	761.2	909.1	717.384	642.879	0.103856	302.719	1.1	-1	0.7	0.0476125
16	GF5B_AHSI_W107.8_N40.7_20221018_005924_L10000222668	Craig_20221018	Craig	40.4627	-107.591	GF5B	20221018	2022-10-19 02:11:02	2022-10-18 18:11:02	CO	MST	2022-10-18 11:11:02	6021	10/18/2022	11:11	830.6	831.6	753.674	772.348	0.0247779	273.375	1.63	1	1	0.0508125	两个源
17	GF5B_AHSI_W108.2_N36.7_20220610_004030_L10000145798	Four Corners Steam Elec Station_20220610	Four Corners Steam Elec Station	36.69	-108.481	GF5B	20220610	2022-06-11 02:06:07	2022-06-10 18:06:07	NM	MST	2022-06-10 11:06:07	2442	06/10/2022	11:06	1471.5	1052.86	1296.94	1013.26	0.218734	167.814	2.97	1	1	0.0680875	完美
18	GF5B_AHSI_W108.3_N36.7_20220420_003287_L10000117219	Four Corners Steam Elec Station_20220420	Four Corners Steam Elec Station	36.69	-108.481	GF5B	20220420	2022-04-21 02:05:10	2022-04-20 18:05:10	NM	MST	2022-04-20 11:05:10	2442	04/20/2022	11:05	539.3	621.1	495.429	232.696	0.530313	53.3386	2.3	-1	0.7	0.0525562	有排放
19	GF5B_AHSI_W108.3_N36.7_20240106_012407_L10000448627	Four Corners Steam Elec Station_20240106	Four Corners Steam Elec Station	36.69	-108.481	GF5B	20240106	2024-01-07 02:12:33	2024-01-06 18:12:33	NM	MST	2024-01-06 11:12:33	2442	01/06/2024	11:12	1357.4	1191	1201.22	622.694	0.481616	266.152	1.32	1	1	0.0689
20	GF5B_AHSI_W108.8_N41.7_20220212_002311_L10000077220	Jim Bridger_20220212	Jim Bridger	41.7378	-108.787	GF5B	20220212	2022-02-13 02:10:06	2022-02-12 18:10:06	WY	MST	2022-02-12 11:10:06	8066	02/12/2022	11:10	580.1	545	520.951	699.748	0.343213	83.6041	4.49	1	1	0.0305625	有排放，但周围噪声明显更大，不适合反演
21	GF5B_AHSI_W109.0_N41.6_20231031_011431_L10000413197	Jim Bridger_20231031	Jim Bridger	41.7378	-108.787	GF5B	20231031	2023-11-01 02:20:04	2023-10-31 18:20:04	WY	MST	2023-10-31 11:20:04	8066	10/31/2023	11:20	1208.8	1174.8	1086.32	1144	0.0530966	107.361	6.01	-1	1	0.0373375
22	GF5B_AHSI_W109.1_N41.6_20231221_012174_L10000440228	Jim Bridger_20231221	Jim Bridger	41.7378	-108.787	GF5B	20231221	2023-12-22 02:20:37	2023-12-21 18:20:37	WY	MST	2023-12-21 11:20:37	8066	12/21/2023	11:20	994.7	868	864.063	749.324	0.13279	125.307	3.18	1	0.7	0.0353188
23	GF5B_AHSI_W110.9_N39.2_20220418_003258_L10000114473	Hunter_20220418	Hunter	39.1747	-111.029	GF5B	20220418	2022-04-19 02:17:59	2022-04-18 18:17:59	UT	MST	2022-04-18 11:17:59	6165	04/18/2022	11:17	909.6	899.7	822.631	133.406	0.83783	98.9024	0.6	1	-1	0.0108125	低风速
24	GF5B_AHSI_W110.9_N39.2_20240104_012378_L10000447404	Hunter_20240104	Hunter	39.1747	-111.029	GF5B	20240104	2024-01-05 02:25:25	2024-01-04 18:25:25	UT	MST	2024-01-04 11:25:25	6165	01/04/2024	11:25	353.2	352.6	320.191	267.579	0.164312	198.958	0.6	1	1	0.0598125
25	GF5B_AHSI_W80.4_N39.2_20231012_011153_L10000404427	Harrison Power Station_20231012	Harrison Power Station	39.3844	-80.3325	GF5B	20231012	2023-10-13 00:23:33	2023-10-12 16:23:33	WV	EST	2023-10-12 11:23:33	3944	10/12/2023	11:23	229.9	228.3	208.005	232.887	0.119621	150.94	0.73	-1	0.5	0.0449437	伪排放
26	GF5B_AHSI_W85.2_N38.7_20231031_011430_L10000413176	Trimble County_20231031	Trimble County	38.5847	-85.4117	GF5B	20231031	2023-11-01 00:42:01	2023-10-31 16:42:01	KY	EST	2023-10-31 11:42:01	6071	10/31/2023	11:42	278.2	284.99	256.691	1221.28	3.75781	199.27	3.2	-1	0.5	0.0401562	探测到了，但算的不准（该案例说明GF5的探测下限达到256t/h, 3m/s）
27	GF5B_AHSI_W85.3_N38.7_20230714_009842_L10000360353	Trimble County_20230714	Trimble County	38.5847	-85.4117	GF5B	20230714	2023-07-15 00:42:09	2023-07-14 16:42:09	KY	EST	2023-07-14 11:42:09	6071	07/14/2023	11:42	1373.5	1399.05	1262.24	1355.58	0.0739414	537.874	1.52	1	1	0.0529188
28	GF5B_AHSI_W88.6_N37.1_20231212_012042_L10000435322	Shawnee_20231212	Shawnee	37.1517	-88.775	GF5B	20231212	2023-12-13 00:54:21	2023-12-12 16:54:21	KY	CST	2023-12-12 10:54:21	1379	12/12/2023	10:54	943.299	928	843.255	1183.51	0.403497	373.029	1.77	1	0.5	0.0467125	羽流飘到了水面上，水汽干扰大
29	GF5B_AHSI_W88.6_N37.2_20220326_002922_L10000100107	Shawnee_20220326	Shawnee	37.1517	-88.775	GF5B	20220326	2022-03-27 00:46:28	2022-03-26 16:46:28	KY	CST	2022-03-26 10:46:28	1379	03/26/2022	10:46	811.401	780.998	714.945	670.614	0.0620056	73.4084	5.61	-1	0.5	0.0403437	羽流飘到了水面上，水汽干扰大
30	GF5B_AHSI_W88.7_N37.2_20230825_010454_L10000380643	Shawnee_20230825	Shawnee	37.1517	-88.775	GF5B	20230825	2023-08-26 00:54:41	2023-08-25 16:54:41	KY	CST	2023-08-25 10:54:41	1379	08/25/2023	10:54	1266.6	1261.2	1144.63	996.715	0.129228	197.3	2.61	1	1	0.05605	有排放，圆形，无羽流形状
31	GF5B_AHSI_W92.2_N34.3_20231006_011066_L10000401605	White Bluff_20231006	White Bluff	34.4236	-92.1392	GF5B	20231006	2023-10-07 01:05:59	2023-10-06 17:05:59	AR	CST	2023-10-06 11:05:59	6009	10/06/2023	11:05	320	380.1	294.843	645.46	1.18917	127.636	2.8	-1	0.5	0.05195
32	GF5B_AHSI_W94.2_N45.6_20220602_003913_L10000141558	Sherburne County_20220602	Sherburne County	45.3792	-93.8958	GF5B	20220602	2022-06-03 01:19:01	2022-06-02 17:19:01	MN	CST	2022-06-02 11:19:01	6090	06/02/2022	11:19	411.9	411.2	373.468	630.636	0.688593	75.8409	4.82	-1	0.7	0.0113437
33	GF5B_AHSI_W94.3_N32.3_20231103_011474_L10000414550	Martin Lake_20231103	Martin Lake	32.2597	-94.5703	GF5B	20231103	2023-11-04 01:12:54	2023-11-03 17:12:54	TX	CST	2023-11-03 11:12:54	6146	11/03/2023	11:12	1488.1	1487.9	1349.95	1692.31	0.253615	370.567	2.34	-1	1	0.0425813	有羽流，水面噪声大
34	GF5B_AHSI_W94.5_N32.3_20220407_003097_L10000107611	Martin Lake_20220407	Martin Lake	32.2597	-94.5703	GF5B	20220407	2022-04-08 01:05:50	2022-04-07 17:05:50	TX	CST	2022-04-07 11:05:50	6146	04/07/2022	11:05	1469.4	1514	1336.39	674.393	0.495362	71.2576	6.16	1	0.5	0.0462562
35	GF5B_AHSI_W94.5_N38.2_20221019_005938_L10000223276	La Cygne_20221019	La Cygne	38.3472	-94.6467	GF5B	20221019	2022-10-20 01:15:33	2022-10-19 17:15:33	KS	CST	2022-10-19 11:15:33	1241	10/19/2022	11:15	708.8	713.2	644.01	553.267	0.140904	110.276	2.6	-1	0.7	0.054075	32波段可见排放源
36	GF5B_AHSI_W96.5_N31.3_20221019_005938_L10000223290	Oak Grove_20221019	Oak Grove	31.185	-96.4853	GF5B	20221019	2022-10-20 01:17:28	2022-10-19 17:17:28	TX	CST	2022-10-19 11:17:28	6180	10/19/2022	11:17	1788.5	1803.2	1626.28	1548.93	0.0475589	590.801	1.55	1	1	0.0284438	有排放
37	GF5B_AHSI_W96.9_N29.8_20221019_005938_L10000223293	Sam Seymour_20221019	Sam Seymour	29.9172	-96.7506	GF5B	20221019	2022-10-20 01:17:53	2022-10-19 17:17:53	TX	CST	2022-10-19 11:17:53	6179	10/19/2022	11:17	964.3	979	878.577	1357.17	0.544734	256.738	2.61	-1	1	0.01895
38	ZY1E_AHSI_W101.24_N41.04_20230805_020428_L1A0000637084	Gerald Gentleman Station_20230805	Gerald Gentleman Station	41.0808	-101.141	ZY1E	20230805	2023-08-05 17:48:20	2023-08-05 17:48:20	NE	CST	2023-08-05 11:48:20	6077	08/05/2023	11:48	1358.5	1357.1	1231.39	1533.82	0.245599	148.41	6.02	-1	0.7	0.02355
39	ZY1E_AHSI_W101.46_N35.28_20220305_012995_L1A0000414997	Harrington Station_20220305	Harrington Station	35.2972	-101.748	ZY1E	20220305	2022-03-05 17:52:24	2022-03-05 17:52:24	TX	CST	2022-03-05 11:52:24	6193	03/05/2022	11:52	167.2	177.3	159.622	808.979	4.06808	56.9022	10.76	1	0	0.0345688	排放强度太低了，无法检测到
40	ZY1E_AHSI_W101.95_N35.28_20220331_013368_L1A0000427095	Harrington Station_20220331	Harrington Station	35.2972	-101.748	ZY1E	20220331	2022-03-31 17:54:08	2022-03-31 17:54:08	TX	CST	2022-03-31 11:54:08	6193	03/31/2022	11:54	641.9	638.7	579.709	604.156	0.04217	62.5103	5.28	1	1	0.039525
41	ZY1E_AHSI_W101.95_N47.64_20201123_006296_L1A0000193277	Antelope Valley_20201123	Antelope Valley	47.371	-101.836	ZY1E	20201123	2020-11-23 18:05:58	2020-11-23 18:05:58	ND	CST	2020-11-23 12:05:58	6469	11/23/2020	12:05	372.7	365.9	337.594	1748.72	4.17996	162.928	6.44	1	0	0.0407125	这一景还是不太好反演
42	ZY1E_AHSI_W104.76_N41.92_20230917_021045_L1A0000655064	Laramie River_20230917	Laramie River	42.1103	-104.883	ZY1E	20230917	2023-09-17 18:02:08	2023-09-17 18:02:08	WY	MST	2023-09-17 11:02:08	6204	09/17/2023	11:02	1667.1	1881.6	1518.85	1523.98	0.00337354	124.379	7.79	-1	0.7	0.0385938	羽流良好
43	ZY1E_AHSI_W104.93_N41.92_20230625_019840_L1A0000620580	Laramie River_20230625	Laramie River	42.1103	-104.883	ZY1E	20230625	2023-06-25 18:05:08	2023-06-25 18:05:08	WY	MST	2023-06-25 11:05:08	6204	06/25/2023	11:05	1043.4	1114.7	951.947	1041.59	0.0941639	209.223	2.52	1	1	0.0640687	有排放
44	ZY1E_AHSI_W105.13_N42.36_20200825_005004_L1A0000136593	Laramie River_20200825	Laramie River	42.1103	-104.883	ZY1E	20200825	2020-08-25 18:10:51	2020-08-25 18:10:51	WY	MST	2020-08-25 11:10:51	6204	08/25/2020	11:10	520.3	520.5	472.038	515.95	0.0930255	83.1512	3.13	1	1	0.0039875
45	ZY1E_AHSI_W107.47_N40.60_20231007_021332_L1A0000663395	Craig_20231007	Craig	40.4627	-107.591	ZY1E	20231007	2023-10-07 18:11:00	2023-10-07 18:11:00	CO	MST	2023-10-07 11:11:00	6021	10/07/2023	11:11	487.2	518.1	447.12	656.686	0.468704	269.322	1.36	1	0.7	0.050575	有排放 不像羽流
46	ZY1E_AHSI_W107.63_N40.60_20230715_020127_L1A0000628485	Craig_20230715	Craig	40.4627	-107.591	ZY1E	20230715	2023-07-15 18:14:00	2023-07-15 18:14:00	CO	MST	2023-07-15 11:14:00	6021	07/15/2023	11:14	892.4	903.4	811.9	952.417	0.173071	168.331	2.81	-1	1	0.0207937	19波段较好
47	ZY1E_AHSI_W108.64_N36.61_20200917_005334_L1A0000154763	Four Corners Steam Elec Station_20200917	Four Corners Steam Elec Station	36.69	-108.481	ZY1E	20200917	2020-09-17 18:19:28	2020-09-17 18:19:28	NM	MST	2020-09-17 11:19:28	2442	09/17/2020	11:19	1507.6	1506	1367.21	858.119	0.372359	156.05	2.71	1	1	0.07125	羽流形状好
48	ZY1E_AHSI_W108.68_N41.92_20200911_005248_L1A0000148906	Jim Bridger_20200911	Jim Bridger	41.7378	-108.787	ZY1E	20200911	2020-09-11 18:24:53	2020-09-11 18:24:53	WY	MST	2020-09-11 11:24:53	8066	09/11/2020	11:24	1437.4	1314.4	1259.35	1352.99	0.0743528	112.981	7.11	-1	1	0.0484875	排放位置在山上，不像排放源
49	ZY1E_AHSI_W108.72_N36.61_20231007_021332_L1A0000663404	Four Corners Steam Elec Station_20231007	Four Corners Steam Elec Station	36.69	-108.481	ZY1E	20231007	2023-10-07 18:12:07	2023-10-07 18:12:07	NM	MST	2023-10-07 11:12:07	2442	10/07/2023	11:12	1532.3	1509.9	1386.01	875.727	0.368169	289.375	1.7	1	1	0.05145	羽流很完整，可以作为案例
50	ZY1E_AHSI_W108.78_N41.92_20200813_004832_L1A0000126505	Jim Bridger_20200813	Jim Bridger	41.7378	-108.787	ZY1E	20200813	2020-08-13 18:24:46	2020-08-13 18:24:46	WY	MST	2020-08-13 11:24:46	8066	08/13/2020	11:24	1902.1	1640.8	1630.74	647.743	0.602791	64.9622	5.41	-1	0.7	0.0312687	羽流形状很好，不过怎么风速有点问题
51	ZY1E_AHSI_W111.21_N39.27_20201004_005578_L1A0000168618	Hunter_20201004	Hunter	39.1747	-111.029	ZY1E	20201004	2020-10-04 18:32:36	2020-10-04 18:32:36	UT	MST	2020-10-04 11:32:36	6165	10/04/2020	11:32	656	681.6	607.499	1002.94	0.650932	242.863	2.13	1	1	0.0225375	完美
52	ZY1E_AHSI_W111.31_N39.27_20200905_005163_L1A0000144224	Hunter_20200905	Hunter	39.1747	-111.029	ZY1E	20200905	2020-09-05 18:32:32	2020-09-05 18:32:32	UT	MST	2020-09-05 11:32:32	6165	09/05/2020	11:32	1057.9	1295.6	1074.72	754.513	0.297943	211.778	1.91	-1	0.7	0.0087125	有羽流
53	ZY1E_AHSI_W85.49_N38.38_20220327_013308_L1A0000425150	Trimble County_20220327	Trimble County	38.5847	-85.4117	ZY1E	20220327	2022-03-27 16:51:14	2022-03-27 16:51:14	KY	EST	2022-03-27 11:51:14	6071	03/27/2022	11:51	412.9	409.2	371.723	291.05	0.217027	48.8362	3.62	-1	0	0.042875
54	ZY1E_AHSI_W86.17_N36.17_20220327_013308_L1A0000425155	Gallatin_20220327	Gallatin	36.3156	-86.4006	ZY1E	20220327	2022-03-27 16:51:51	2022-03-27 16:51:51	TN	CST	2022-03-27 10:51:51	3403	03/27/2022	10:51	307	306.4	278.043	199.182	0.283629	50.5308	2.48	1	0	0.02585
55	ZY1E_AHSI_W86.59_N36.17_20221004_016048_L1A0000511602	Gallatin_20221004	Gallatin	36.3156	-86.4006	ZY1E	20221004	2022-10-04 16:51:33	2022-10-04 16:51:33	TN	CST	2022-10-04 10:51:33	3403	10/04/2022	10:51	758.6	764.3	692.586	885.581	0.278659	349.593	1.48	-1	0.7	0.0246187	像伪排放源
56	ZY1E_AHSI_W88.87_N37.06_20211128_011601_L1A0000371189	Shawnee_20211128	Shawnee	37.1517	-88.775	ZY1E	20211128	2021-11-28 17:03:59	2021-11-28 17:03:59	KY	CST	2021-11-28 11:03:59	1379	11/28/2021	11:03	406.4	406.4	368.68	464.253	0.259232	76.742	3.51	-1	0.5	0.0511062	有排放
57	ZY1E_AHSI_W88.95_N37.06_20210119_007111_L1A0000229838	Shawnee_20210119	Shawnee	37.1517	-88.775	ZY1E	20210119	2021-01-19 17:02:53	2021-01-19 17:02:53	KY	CST	2021-01-19 11:02:53	1379	01/19/2021	11:02	868.501	669.401	781.87	834.872	0.0677887	318.148	1.57	1	1	0.01875	右下角伪排放源
58	ZY1E_AHSI_W89.08_N37.06_20201221_006696_L1A0000212411	Shawnee_20201221	Shawnee	37.1517	-88.775	ZY1E	20201221	2020-12-21 17:03:04	2020-12-21 17:03:04	KY	CST	2020-12-21 11:03:04	1379	12/21/2020	11:03	386.9	386.599	350.976	735.794	1.09642	79.5356	6.44	-1	0	0.0439312
59	ZY1E_AHSI_W90.79_N38.83_20210925_010683_L1A0000340283	Labadie_20210925	Labadie	38.5583	-90.8361	ZY1E	20210925	2021-09-25 17:13:23	2021-09-25 17:13:23	MO	CST	2021-09-25 11:13:23	2103	09/25/2021	11:13	1746.6	1732.6	1581.74	1683.52	0.0643468	289.973	2.94	-1	1	0.03895
60	ZY1E_AHSI_W90.90_N38.38_20220113_012261_L1A0000391512	Labadie_20220113	Labadie	38.5583	-90.8361	ZY1E	20220113	2022-01-13 17:13:19	2022-01-13 17:13:19	MO	CST	2022-01-13 11:13:19	2103	01/13/2022	11:13	1841.4	1849.6	1672.1	1513.31	0.0949654	493.741	1.73	-1	1	0.0253375
61	ZY1E_AHSI_W90.98_N38.38_20230329_018573_L1A0000585856	Labadie_20230329	Labadie	38.5583	-90.8361	ZY1E	20230329	2023-03-29 17:07:56	2023-03-29 17:07:56	MO	CST	2023-03-29 11:07:56	2103	03/29/2023	11:07	2464.5	2453.2	2234.56	2043.98	0.0852885	755.658	1.58	1	0.7	0.0362437	羽流沿着江面规整陈列
62	ZY1E_AHSI_W91.94_N34.40_20220726_015044_L1A0000481359	White Bluff_20220726	White Bluff	34.4236	-92.1392	ZY1E	20220726	2022-07-26 17:12:13	2022-07-26 17:12:13	AR	CST	2022-07-26 11:12:13	6009	07/26/2022	11:12	1389.4	1742.2	1324.45	1075.96	0.187617	174.819	3.26	-1	0.7	0.0397313	微弱的排放
63	ZY1E_AHSI_W92.11_N34.40_20220113_012261_L1A0000391521	White Bluff_20220113	White Bluff	34.4236	-92.1392	ZY1E	20220113	2022-01-13 17:14:27	2022-01-13 17:14:27	AR	CST	2022-01-13 11:14:27	6009	01/13/2022	11:14	901.3	897.1	816.757	686.383	0.159624	164.4	2.28	-1	1	0.0441937	没有排放
64	ZY1E_AHSI_W92.15_N34.40_20220309_013050_L1A0000416988	White Bluff_20220309	White Bluff	34.4236	-92.1392	ZY1E	20220309	2022-03-09 17:14:19	2022-03-09 17:14:19	AR	CST	2022-03-09 11:14:19	6009	03/09/2022	11:14	280.3	279.1	254.03	961.001	2.78302	175.6	2.83	1	0.5	0.0195312	很多云，不适合反演
65	ZY1E_AHSI_W92.33_N34.40_20231104_021729_L1A0000674441	White Bluff_20231104	White Bluff	34.4236	-92.1392	ZY1E	20231104	2023-11-04 17:03:42	2023-11-04 17:03:42	AR	CST	2023-11-04 11:03:42	6009	11/04/2023	11:03	537.3	433.2	482.708	397.288	0.17696	227.796	0.86	1	1	0.0379188
66	ZY1E_AHSI_W93.56_N45.45_20220320_013210_L1A0000421897	Sherburne County_20220320	Sherburne County	45.3792	-93.8958	ZY1E	20220320	2022-03-20 17:31:14	2022-03-20 17:31:14	MN	CST	2022-03-20 11:31:14	6090	03/20/2022	11:31	1451.2	1311.2	1250.89	1302.53	0.0412848	372.512	1.91	-1	0.7	0.046825
67	ZY1E_AHSI_W94.02_N45.45_20220927_015948_L1A0000508557	Sherburne County_20220927	Sherburne County	45.3792	-93.8958	ZY1E	20220927	2022-09-27 17:31:08	2022-09-27 17:31:08	MN	CST	2022-09-27 11:31:08	6090	09/27/2022	11:31	1052.9	1052.9	955.175	1406.01	0.471991	224.11	3.34	-1	1	0.0382	有羽流
68	ZY1E_AHSI_W94.33_N38.38_20211206_011716_L1A0000374910	La Cygne_20211206	La Cygne	38.3472	-94.6467	ZY1E	20211206	2021-12-06 17:27:03	2021-12-06 17:27:03	KS	CST	2021-12-06 11:27:03	1241	12/06/2021	11:27	365.5	442.9	363.173	506.763	0.395375	71.054	4.78	-1	0.5	0.0289688
69	ZY1E_AHSI_W94.40_N32.17_20210401_008144_L1A0000261751	Martin Lake_20210401	Martin Lake	32.2597	-94.5703	ZY1E	20210401	2021-04-01 17:20:59	2021-04-01 17:20:59	TX	CST	2021-04-01 11:20:59	6146	04/01/2021	11:20	1201.3	1170.4	1080.46	1073.3	0.00662678	179.679	3.06	-1	1	0.0476688	有羽流
70	ZY1E_AHSI_W94.44_N38.38_20210913_010511_L1A0000334632	La Cygne_20210913	La Cygne	38.3472	-94.6467	ZY1E	20210913	2021-09-13 17:27:32	2021-09-13 17:27:32	KS	CST	2021-09-13 11:27:32	1241	09/13/2021	11:27	662.6	671	604.53	700.786	0.159225	85.6868	5.41	-1	0.5	0.0535875
71	ZY1E_AHSI_W94.49_N38.38_20200711_004357_L1A0000107667	La Cygne_20200711	La Cygne	38.3472	-94.6467	ZY1E	20200711	2020-07-11 17:23:19	2020-07-11 17:23:19	KS	CST	2020-07-11 11:23:19	1241	07/11/2020	11:23	1601.4	1598	1451.58	1986.86	0.368755	367.234	2.72	1	1	0.0482563	反演效果不好，只有一团排放；感觉有点像是把水汽也核算进去了，偏高很多；误差太大了
72	ZY1E_AHSI_W94.59_N32.17_20220303_012967_L1A0000414108	Martin Lake_20220303	Martin Lake	32.2597	-94.5703	ZY1E	20220303	2022-03-03 17:22:15	2022-03-03 17:22:15	TX	CST	2022-03-03 11:22:15	6146	03/03/2022	11:22	1866.9	1838.5	1684.18	565.812	0.664043	429.042	0.58	-1	-1	0.0385375	这一景本应该能够看到完美羽流的，但是羽流的方向刚好经过了湖面，导致出现一段非常大的异常高值
73	ZY1E_AHSI_W94.77_N32.17_20210104_006896_L1A0000221658	Martin Lake_20210104	Martin Lake	32.2597	-94.5703	ZY1E	20210104	2021-01-04 17:21:40	2021-01-04 17:21:40	TX	CST	2021-01-04 11:21:40	6146	01/04/2021	11:21	1286	1418.3	1208.65	1686.8	0.395609	460.001	1.96	-1	0.5	0.0420625	水汽干扰大，几乎无反演结果
74	ZY1E_AHSI_W96.19_N31.29_20220130_012507_L1A0000399543	Oak Grove_20220130	Oak Grove	31.185	-96.4853	ZY1E	20220130	2022-01-30 17:28:05	2022-01-30 17:28:05	TX	CST	2022-01-30 11:28:05	6180	01/30/2022	11:28	1396	1398.9	1267.66	1100.82	0.131613	131.342	4.62	-1	1	0.0176562
75	ZY1E_AHSI_W96.23_N31.29_20220326_013296_L1A0000424559	Oak Grove_20220326	Oak Grove	31.185	-96.4853	ZY1E	20220326	2022-03-26 17:27:55	2022-03-26 17:27:55	TX	CST	2022-03-26 11:27:55	6180	03/26/2022	11:27	767.3	835.6	723.965	806.052	0.113385	125.953	3.3	-1	0.7	0.0239313
76	ZY1E_AHSI_W96.26_N31.29_20201006_005607_L1A0000169633	Oak Grove_20201006	Oak Grove	31.185	-96.4853	ZY1E	20201006	2020-10-06 17:25:38	2020-10-06 17:25:38	TX	CST	2020-10-06 11:25:38	6180	10/06/2020	11:25	1874.4	1879.2	1702.24	1637.74	0.0378909	455.598	1.93	-1	1	0.0381625	有排放，无羽流
77	ZY1E_AHSI_W96.28_N31.29_20210424_008474_L1A0000271419	Oak Grove_20210424	Oak Grove	31.185	-96.4853	ZY1E	20210424	2021-04-24 17:27:56	2021-04-24 17:27:56	TX	CST	2021-04-24 11:27:56	6180	04/24/2021	11:27	893.6	900.9	813.64	1392.18	0.711045	135.342	5.95	-1	0.7	0.0259563	偏高
78	ZY1E_AHSI_W96.41_N31.29_20211206_011716_L1A0000374926	Oak Grove_20211206	Oak Grove	31.185	-96.4853	ZY1E	20211206	2021-12-06 17:29:06	2021-12-06 17:29:06	TX	CST	2021-12-06 11:29:06	6180	12/06/2021	11:29	1798.7	1790.1	1627.98	1688.68	0.0372857	147.5	7.76	-1	1	0.0223	有一点点羽流
79	ZY1E_AHSI_W96.55_N29.95_20220130_012507_L1A0000399546	Sam Seymour_20220130	Sam Seymour	29.9172	-96.7506	ZY1E	20220130	2022-01-30 17:28:28	2022-01-30 17:28:28	TX	CST	2022-01-30 11:28:28	6179	01/30/2022	11:28	1394.8	1390.4	1263.48	1088.58	0.138427	194.505	2.83	-1	0.7	0.0215125
80	ZY1E_AHSI_W96.58_N31.29_20200711_004359_L1A0000107694	Oak Grove_20200711	Oak Grove	31.185	-96.4853	ZY1E	20200711	2020-07-11 17:25:19	2020-07-11 17:25:19	TX	CST	2020-07-11 11:25:19	6180	07/11/2020	11:25	1869.6	1875.6	1698.34	1980.98	0.166421	302.557	3.26	1	1	0.0337	羽流可以
81	ZY1E_AHSI_W96.59_N29.95_20220326_013296_L1A0000424562	Sam Seymour_20220326	Sam Seymour	29.9172	-96.7506	ZY1E	20220326	2022-03-26 17:28:17	2022-03-26 17:28:17	TX	CST	2022-03-26 11:28:17	6179	03/26/2022	11:28	1765.4	1773.9	1605.14	1617.15	0.0074827	205.433	3.98	-1	1	0.028925	能看到排放，但羽流飘到了湖面上
82	ZY1E_AHSI_W96.65_N29.95_20210424_008474_L1A0000271422	Sam Seymour_20210424	Sam Seymour	29.9172	-96.7506	ZY1E	20210424	2021-04-24 17:28:19	2021-04-24 17:28:19	TX	CST	2021-04-24 11:28:19	6179	04/24/2021	11:28	1037.5	1164.7	995.055	1189.39	0.195301	112.492	6.15	-1	1	0.0282375
83	ZY1E_AHSI_W96.74_N31.10_20200612_003941_L1A0000093912	Oak Grove_20200612	Oak Grove	31.185	-96.4853	ZY1E	20200612	2020-06-12 17:25:12	2020-06-12 17:25:12	TX	CST	2020-06-12 11:25:12	6180	06/12/2020	11:25	1759.1	1762.5	1597.11	1871.45	0.171767	238.957	4	-1	1	0.0420125	排放羽流很清晰
84	ZY1E_AHSI_W96.95_N29.95_20200711_004359_L1A0000107697	Sam Seymour_20200711	Sam Seymour	29.9172	-96.7506	ZY1E	20200711	2020-07-11 17:25:42	2020-07-11 17:25:42	TX	CST	2020-07-11 11:25:42	6179	07/11/2020	11:25	1793.1	1824.9	1638.69	1563.8	0.0457037	273.503	2.82	-1	1	0.0214937	有羽流，还不错，飘到水面上了，前16波段清晰；作为强吸收和弱吸收的案例
85	ZY1E_AHSI_W97.05_N29.95_20200612_003941_L1A0000093915	Sam Seymour_20200612	Sam Seymour	29.9172	-96.7506	ZY1E	20200612	2020-06-12 17:25:31	2020-06-12 17:25:31	TX	CST	2020-06-12 11:25:31	6179	06/12/2020	11:25	1467.5	1562.8	1367.32	1768.94	0.293733	243.035	3.64	-1	1	0.0363	羽流形状很好，可以作为案例
86	ZY1E_AHSI_W98.07_N29.51_20220930_015991_L1A0000509878	J K Spruce_20220930	J K Spruce	29.3091	-98.3205	ZY1E	20220930	2022-09-30 17:31:53	2022-09-30 17:31:53	TX	CST	2022-09-30 11:31:53	7097	09/30/2022	11:31	1501.1	1499.5	1361.03	1199.12	0.118955	434.204	1.61	-1	1	0.0165812	有噪声，有羽流
87	ZY1E_AHSI_W98.20_N29.06_20220418_013626_L1A0000435959	J K Spruce_20220418	J K Spruce	29.3091	-98.3205	ZY1E	20220418	2022-04-18 17:33:49	2022-04-18 17:33:49	TX	CST	2022-04-18 11:33:49	7097	04/18/2022	11:33	629.1	628.9	570.61	585.382	0.0258885	59.0496	6.44	-1	0.7	0.0264375
88	ZY1E_AHSI_W98.50_N29.51_20200930_005521_L1A0000170469	J K Spruce_20200930	J K Spruce	29.3091	-98.3205	ZY1E	20200930	2020-09-30 17:33:03	2020-09-30 17:33:03	TX	CST	2020-09-30 11:33:03	7097	09/30/2020	11:33	914.9	958.2	851.588	993.261	0.166363	158.001	3.18	-1	1	0.0255
89	ZY1E_AHSI_W98.51_N29.06_20201029_005935_L1A0000194928	J K Spruce_20201029	J K Spruce	29.3091	-98.3205	ZY1E	20201029	2020-10-29 17:33:12	2020-10-29 17:33:12	TX	CST	2020-10-29 11:33:12	7097	10/29/2020	11:33	508.1	564.9	489.281	581.998	0.189496	58.3041	7.17	1	0.7	0.0196125	有团块排放
90	ZY1E_AHSI_W98.53_N29.51_20220514_013997_L1A0000447750	J K Spruce_20220514	J K Spruce	29.3091	-98.3205	ZY1E	20220514	2022-05-14 17:35:16	2022-05-14 17:35:16	TX	CST	2022-05-14 11:35:16	7097	05/14/2022	11:35	1041	1035.2	941.31	1544.21	0.640487	376.863	2.12	1	1	0.0247125
91	ZY1F_AHSI_W101.04_N41.04_20230916_009032_L1A0000537816	Gerald Gentleman Station_20230916	Gerald Gentleman Station	41.0808	-101.141	ZY1F	20230916	2023-09-16 18:00:26	2023-09-16 18:00:26	NE	CST	2023-09-16 12:00:26	6077	09/16/2023	12:00	1330.8	1109.2	1207.28	1459.97	0.209307	185.926	3.96	1	0.7	0.0239625
92	ZY1F_AHSI_W101.05_N41.04_20231110_009821_L1A0000582861	Gerald Gentleman Station_20231110	Gerald Gentleman Station	41.0808	-101.141	ZY1F	20231110	2023-11-10 18:01:07	2023-11-10 18:01:07	NE	CST	2023-11-10 12:01:07	6077	11/10/2023	12:01	1304.1	1307.4	1183.11	1232.6	0.041833	132.222	4.88	-1	0.7	0.0092
93	ZY1F_AHSI_W101.48_N41.04_20230624_007827_L1A0000469131	Gerald Gentleman Station_20230624	Gerald Gentleman Station	41.0808	-101.141	ZY1F	20230624	2023-06-24 18:00:53	2023-06-24 18:00:53	NE	CST	2023-06-24 12:00:53	6077	06/24/2023	12:00	688	687.2	624.143	571.811	0.0838457	49.1	7.6	-1	1	0.026325	10波段效果好
94	ZY1F_AHSI_W104.83_N41.92_20230930_009233_L1A0000549577	Laramie River_20230930	Laramie River	42.1103	-104.883	ZY1F	20230930	2023-09-30 18:16:43	2023-09-30 18:16:43	WY	MST	2023-09-30 11:16:43	6204	09/30/2023	11:16	798.9	661.1	691.414	778.71	0.126257	114.854	3.4	-1	1	0.0346875	有羽流
95	ZY1F_AHSI_W107.55_N40.59_20231020_009525_L1A0000564874	Craig_20231020	Craig	40.4627	-107.591	ZY1F	20231020	2023-10-20 18:26:24	2023-10-20 18:26:24	CO	MST	2023-10-20 11:26:24	6021	10/20/2023	11:26	729.3	742.5	666.799	35.358	0.946974	36.0968	0.42	-1	0.5	0.0521312	22有一个羽流 24双羽流0.001
96	ZY1F_AHSI_W110.71_N39.27_20230817_008602_L1A0000512937	Hunter_20230817	Hunter	39.1747	-111.029	ZY1F	20230817	2023-08-17 18:36:51	2023-08-17 18:36:51	UT	MST	2023-08-17 11:36:51	6165	08/17/2023	11:36	654	651.7	592.047	687.146	0.160628	173.681	2.06	1	1	0.001525
97	ZY1F_AHSI_W110.73_N39.27_20230623_007813_L1A0000468861	Hunter_20230623	Hunter	39.1747	-111.029	ZY1F	20230623	2023-06-23 18:36:03	2023-06-23 18:36:03	UT	MST	2023-06-23 11:36:03	6165	06/23/2023	11:36	422.6	419.8	381.852	485.722	0.272015	46.5371	6.19	-1	0.7	0.0039625	有点不像
98	ZY1F_AHSI_W111.15_N39.27_20230719_008186_L1A0000490264	Hunter_20230719	Hunter	39.1747	-111.029	ZY1F	20230719	2023-07-19 18:38:10	2023-07-19 18:38:10	UT	MST	2023-07-19 11:38:10	6165	07/19/2023	11:38	656.412	749.552	649.001	151.541	0.766501	129.724	0.5	1	-1	0.00094375	清晰完美
99	ZY1F_AHSI_W80.08_N39.27_20220621_002553_L1A0000190867	Harrison Power Station_20220621	Harrison Power Station	39.3844	-80.3325	ZY1F	20220621	2022-06-21 16:24:44	2022-06-21 16:24:44	WV	EST	2022-06-21 11:24:44	3944	06/21/2022	11:24	1900.6	2008.4	1763.31	1450.12	0.177617	316.608	2.33	1	1	0.0493	非常清晰
100	ZY1F_AHSI_W80.61_N39.27_20230418_006865_L1A0000414746	Harrison Power Station_20230418	Harrison Power Station	39.3844	-80.3325	ZY1F	20230418	2023-04-18 16:34:27	2023-04-18 16:34:27	WV	EST	2023-04-18 11:34:27	3944	04/18/2023	11:34	631.6	618	565.987	495.553	0.124443	53.1873	5.73	-1	1	0.0309187
101	ZY1F_AHSI_W86.57_N36.17_20230305_006234_L1A0000379047	Gallatin_20230305	Gallatin	36.3156	-86.4006	ZY1F	20230305	2023-03-05 16:54:32	2023-03-05 16:54:32	TN	CST	2023-03-05 10:54:32	3403	03/05/2023	10:54	278.3	276	250.592	350.731	0.399613	76.3399	2.5	-1	0	0.0292313	无排放
102	ZY1F_AHSI_W88.63_N37.05_20231031_009677_L1A0000574307	Shawnee_20231031	Shawnee	37.1517	-88.775	ZY1F	20231031	2023-10-31 17:07:20	2023-10-31 17:07:20	KY	CST	2023-10-31 11:07:20	1379	10/31/2023	11:07	879.1	888.799	798.533	1463.34	0.832536	207.459	3.6	-1	0.5	0.0614625	羽流飘到了水面上，水汽干扰大
103	ZY1F_AHSI_W90.79_N38.83_20230704_007970_L1A0000476992	Labadie_20230704	Labadie	38.5583	-90.8361	ZY1F	20230704	2023-07-04 17:16:01	2023-07-04 17:16:01	MO	CST	2023-07-04 11:16:01	2103	07/04/2023	11:16	2560.7	2558.1	2322.4	2606.44	0.122305	542.706	2.41	1	1	0.0230375	构成羽流，有排放
104	ZY1F_AHSI_W90.93_N38.38_20231022_009549_L1A0000565683	Labadie_20231022	Labadie	38.5583	-90.8361	ZY1F	20231022	2023-10-22 17:17:43	2023-10-22 17:17:43	MO	CST	2023-10-22 11:17:43	2103	10/22/2023	11:17	2197.7	2194	1992.77	2016.96	0.0121401	562.965	1.92	-1	0.7	0.050625	受江水影响较大
105	ZY1F_AHSI_W93.93_N45.45_20220721_002978_L1A0000173921	Sherburne County_20220721	Sherburne County	45.3792	-93.8958	ZY1F	20220721	2022-07-21 17:27:56	2022-07-21 17:27:56	MN	CST	2022-07-21 11:27:56	6090	07/21/2022	11:27	2400.9	2419.9	2185.82	2244.75	0.0269634	212.893	5.9	1	1	0.0392562	适合作为反演案例
106	ZY1F_AHSI_W94.55_N32.17_20231210_010251_L1A0000608285	Martin Lake_20231210	Martin Lake	32.2597	-94.5703	ZY1F	20231210	2023-12-10 17:27:08	2023-12-10 17:27:08	TX	CST	2023-12-10 11:27:08	6146	12/10/2023	11:27	1027.6	1026.4	931.733	1001.33	0.0747012	118.382	4.79	-1	1	0.0414062	有羽流
107	ZY1F_AHSI_W94.55_N38.38_20220920_003853_L1A0000229994	La Cygne_20220920	La Cygne	38.3472	-94.6467	ZY1F	20220920	2022-09-20 17:24:31	2022-09-20 17:24:31	KS	CST	2022-09-20 11:24:31	1241	09/20/2022	11:24	759.1	765.6	691.003	799.936	0.157646	91.0481	5.01	-1	0.7	0.0331125	水汽影响太大了
108	ZY1F_AHSI_W94.56_N38.38_20230816_008587_L1A0000512042	La Cygne_20230816	La Cygne	38.3472	-94.6467	ZY1F	20230816	2023-08-16 17:31:23	2023-08-16 17:31:23	KS	CST	2023-08-16 11:31:23	1241	08/16/2023	11:31	1273.7	1441.1	1233.94	1002.18	0.187827	180.571	2.8	1	0.7	0.049475	飘到湖面上了
109	ZY1F_AHSI_W94.57_N32.17_20220802_003150_L1A0000184740	Martin Lake_20220802	Martin Lake	32.2597	-94.5703	ZY1F	20220802	2022-08-02 17:17:29	2022-08-02 17:17:29	TX	CST	2022-08-02 11:17:29	6146	08/02/2022	11:17	2263.6	2623.6	2146.04	2287.43	0.0658858	334.214	3.39	-1	0.7	0.0445625	有排放，圆形，堆叠状，飘到湖面上
110	ZY1F_AHSI_W94.58_N38.38_20230108_005431_L1A0000329362	La Cygne_20230108	La Cygne	38.3472	-94.6467	ZY1F	20230108	2023-01-08 17:27:27	2023-01-08 17:27:27	KS	CST	2023-01-08 11:27:27	1241	01/08/2023	11:27	1406.5	1398.2	1272.57	1093.95	0.14036	484.674	1.2	1	0.7	0.0117938	噪声较大
111	ZY1F_AHSI_W94.61_N32.17_20221120_004728_L1A0000290523	Martin Lake_20221120	Martin Lake	32.2597	-94.5703	ZY1F	20221120	2022-11-20 17:20:45	2022-11-20 17:20:45	TX	CST	2022-11-20 11:20:45	6146	11/20/2022	11:20	2635.2	2664.4	2399.44	2442.43	0.0179158	408.805	2.97	-1	1	0.0436	有一点羽流比较稀疏
112	ZY1F_AHSI_W96.64_N31.29_20220727_003064_L1A0000178119	Oak Grove_20220727	Oak Grove	31.185	-96.4853	ZY1F	20220727	2022-07-27 17:24:51	2022-07-27 17:24:51	TX	CST	2022-07-27 11:24:51	6180	07/27/2022	11:24	1241	1493.7	1217.51	1153.68	0.0524317	152.72	3.79	1	1	0.0259875
113	ZY1F_AHSI_W96.65_N31.29_20230304_006220_L1A0000378222	Oak Grove_20230304	Oak Grove	31.185	-96.4853	ZY1F	20230304	2023-03-04 17:30:35	2023-03-04 17:30:35	TX	CST	2023-03-04 11:30:35	6180	03/04/2023	11:30	650.4	654.3	591.802	631.343	0.0668143	88.0767	3.8	-1	1	0.0314875	被云挡住了
114	ZY1F_AHSI_W96.65_N31.29_20230816_008587_L1A0000512058	Oak Grove_20230816	Oak Grove	31.185	-96.4853	ZY1F	20230816	2023-08-16 17:33:23	2023-08-16 17:33:23	TX	CST	2023-08-16 11:33:23	6180	08/16/2023	11:33	1820.5	1806.6	1644.59	2238.58	0.361174	423.291	2.6	1	1	0.0237813	羽流很好，简直完美！！！适合作为案例
115	ZY1F_AHSI_W96.67_N31.29_20230108_005431_L1A0000329378	Oak Grove_20230108	Oak Grove	31.185	-96.4853	ZY1F	20230108	2023-01-08 17:29:27	2023-01-08 17:29:27	TX	CST	2023-01-08 11:29:27	6180	01/08/2023	11:29	1957.3	1974.5	1783.17	1621.75	0.0905292	189.987	4.4	1	1	0.0252813	有羽流，水池下方有一个点源
116	ZY1F_AHSI_W97.01_N29.95_20230304_006220_L1A0000378225	Sam Seymour_20230304	Sam Seymour	29.9172	-96.7506	ZY1F	20230304	2023-03-04 17:30:57	2023-03-04 17:30:57	TX	CST	2023-03-04 11:30:57	6179	03/04/2023	11:30	672.8	881.2	704.883	1403	0.990397	230.841	3.01	1	1	0.028625
117	ZY1F_AHSI_W97.01_N29.95_20230816_008587_L1A0000512061	Sam Seymour_20230816	Sam Seymour	29.9172	-96.7506	ZY1F	20230816	2023-08-16 17:33:45	2023-08-16 17:33:45	TX	CST	2023-08-16 11:33:45	6179	08/16/2023	11:33	1354.8	1363.7	1233.49	1321.65	0.0714664	279.662	2.37	1	1	0.0234313
118	ZY1F_AHSI_W98.47_N29.51_20221013_004183_L1A0000250381	J K Spruce_20221013	J K Spruce	29.3091	-98.3205	ZY1F	20221013	2022-10-13 17:33:02	2022-10-13 17:33:02	TX	CST	2022-10-13 11:33:02	7097	10/13/2022	11:33	1492.3	1495.9	1355.59	1889.53	0.393886	178.431	5.76	-1	0.7	0.0210313	噪声较大

## Sheet: 按设施统计
排放	(多项)
行标签	计数项:排放	平均值项:反演结果	平均值项:不确定度	平均值项:avg Q(ton/h)	标准偏差项:avg Q(ton/h)		Facility Name	No. of quantitative images	No. of emission images	No. of clear-sky images	Estimated Intensity	EPA inventory(t/h)	Inversion Error			Facility Name	No. of quantitative images	No. of emission images	No. of clear-sky images	Estimated Intensity	平均值项:不确定度	EPA inventory(t/h)	反演误差
Antelope Valley	2	701.709	78.0648	620.607	160.289		Antelope Valley	2	2	4	702±78	620.607	0.130681			Antelope Valley	2	2	4	701.709	78.0648	620.607	0.130681		702±78
Craig	6	722.554	207.054	771.713	258.618		Craig	5	6	6	860±241	771.713	0.0848974			Craig	5	6	6	859.994	241.295	792.696	0.0848974		860±241
Four Corners Steam Elec Station	6	717.937	169.449	1078.3	376.047		Four Corners Steam Elec Station	6	6	6	718±169	1078.3	-0.334197			Four Corners Steam Elec Station	6	6	6	717.937	169.449	1078.3	-0.334197		718±169
Gallatin	1	885.581	348.084	692.586	#DIV/0!		Gallatin	1	1	3	886±348	692.586	0.278659			Gallatin	1	1	3	885.581	348.084	692.586	0.278659		886±348
Gerald Gentleman Station	6	1016.83	119.424	1096.23	233.455		Gerald Gentleman Station	5	6	6	1160±127	1096.23	0.0778357			Gerald Gentleman Station	5	6	6	1160.06	127.2	1076.29	0.0778357		1160±127
Harrington Station	1	604.156	61.1049	579.709	#DIV/0!		Harrington Station	1	1	3	604±61	579.709	0.04217			Harrington Station	1	1	3	604.156	61.1049	579.709	0.04217		604±61
Harrison Power Station	3	726.187	172.322	845.768	814.527		Harrison Power Station	2	3	3	973±183	845.768	-0.164696			Harrison Power Station	2	3	3	972.836	183.381	1164.65	-0.164696		973±183
Hunter	8	481.008	162.471	656.678	244.905		Hunter	5	8	8	640±175	656.678	0.0744527			Hunter	5	8	8	639.58	174.663	595.261	0.0744527		640±175
J K Spruce	7	1128.49	231.551	977.435	364.745		J K Spruce	7	7	7	1128±232	977.435	0.154543			J K Spruce	7	7	7	1128.49	231.551	977.435	0.154543		1128±232
Jim Bridger	6	938.146	104.719	1166.64	438.514		Jim Bridger	6	6	7	938±105	1166.64	-0.195857			Jim Bridger	6	6	7	938.146	104.719	1166.64	-0.195857		938±105
La Cygne	7	949.105	196.675	894.401	416.142		La Cygne	5	7	7	1087±245	894.401	0.0270318			La Cygne	5	7	7	1087.24	245.487	1058.62	0.0270318		1087±245
Labadie	5	1972.84	526.552	1960.71	329.301		Labadie	5	5	5	1973±527	1960.71	0.00618528			Labadie	5	5	5	1972.84	526.552	1960.71	0.00618528		1973±527
Laramie River	4	965.056	132.419	908.563	451.68		Laramie River	4	4	4	965±132	908.563	0.0621779			Laramie River	4	4	4	965.056	132.419	908.563	0.0621779		965±132
Martin Lake	9	1557.51	302.321	1621.81	578.835		Martin Lake	6	9	9	1848±294	1621.81	0.0697906			Martin Lake	6	9	9	1848.43	294.123	1727.84	0.0697906		1848±294
Oak Grove	12	1472.68	246.325	1357.86	427.739		Oak Grove	12	12	12	1473±246	1357.86	0.0845614			Oak Grove	12	12	12	1472.68	246.325	1357.86	0.0845614		1473±246
Sam Seymour	8	1413.71	223.013	1210.83	333.65		Sam Seymour	8	8	8	1414±223	1210.83	0.167554			Sam Seymour	8	8	8	1413.71	223.013	1210.83	0.167554		1414±223
Shawnee	6	935.55	206.026	775.319	249.235		Shawnee	2	6	7	916±256	775.319	-0.0492687			Shawnee	2	6	7	915.793	255.883	963.252	-0.0492687		916±256
Sherburne County	4	1395.98	217.792	1191.34	756.575		Sherburne County	4	4	4	1396±218	1191.34	0.171778			Sherburne County	4	4	4	1395.98	217.792	1191.34	0.171778		1396±218
Trimble County	3	1167.75	393.634	827.89	516.555		Trimble County	2	3	4	1141±492	827.89	0.0246889			Trimble County	2	3	4	1140.98	491.957	1113.49	0.0246889		1141±492
White Bluff	5	753.219	171.266	634.558	445.089		White Bluff	3	5	5	720±186	634.558	-0.176943			White Bluff	3	5	5	719.878	186.228	874.639	-0.176943		720±186
总计	109	1091.98	217.903	1074.98	514.577		Total	91	109	118	1177±228	1074.98	0.0284895			总计	91	109	118	1176.52	227.845	1143.93	0.0284895		1177±228
总数量
行标签	计数项:排放	平均值项:反演结果	标准偏差项:反演结果	平均值项:avg Q(ton/h)	标准偏差项:avg Q(ton/h)
Antelope Valley	4	1056.4	495.356	514.946	163.94
Craig	6	722.554	410.888	771.713	258.618
Four Corners Steam Elec Station	6	717.937	274.393	1078.3	376.047
Gallatin	3	478.498	360.596	407.073	247.641
Gerald Gentleman Station	6	1016.83	494.233	1096.23	233.455
Harrington Station	3	503.474	366.373	335.362	218.285
Harrison Power Station	3	726.187	640.552	845.768	814.527
Hunter	8	481.008	311.235	656.678	244.905
J K Spruce	7	1128.49	477.74	977.435	364.745
Jim Bridger	7	846.681	354.038	1059.5	490.506
La Cygne	7	949.105	506.13	894.401	416.142
Labadie	5	1972.84	419.324	1960.71	329.301
Laramie River	4	965.056	429.989	908.563	451.68
Martin Lake	9	1557.51	769.071	1621.81	578.835
Oak Grove	12	1472.68	477.178	1357.86	427.739
Sam Seymour	8	1413.71	226.124	1210.83	333.65
Shawnee	7	907.014	336.758	714.699	278.368
Sherburne County	4	1395.98	662.068	1191.34	756.575
Trimble County	4	948.574	473.586	713.848	479.487
White Bluff	5	753.219	269.306	634.558	445.089
总计	118	1056.18	570.475	1017.68	534.009
定量的数量（0.7、1）
行标签	计数项:排放	平均值项:反演结果	平均值项:不确定度	平均值项:avg Q(ton/h)	标准偏差项:avg Q(ton/h)
Antelope Valley	2	701.709	78.0648	620.607	160.289
Craig	5	859.994	241.295	792.696	283.376
Four Corners Steam Elec Station	6	717.937	169.449	1078.3	376.047
Gallatin	1	885.581	348.084	692.586	#DIV/0!
Gerald Gentleman Station	5	1160.06	127.2	1076.29	255.23
Harrington Station	1	604.156	61.1049	579.709	#DIV/0!
Harrison Power Station	2	972.836	183.381	1164.65	846.638
Hunter	5	639.58	174.663	595.261	296.33
J K Spruce	7	1128.49	231.551	977.435	364.745
Jim Bridger	6	938.146	104.719	1166.64	438.514
La Cygne	5	1087.24	245.487	1058.62	366.734
Labadie	5	1972.84	526.552	1960.71	329.301
Laramie River	4	965.056	132.419	908.563	451.68
Martin Lake	6	1848.43	294.123	1727.84	686.568
Oak Grove	12	1472.68	246.325	1357.86	427.739
Sam Seymour	8	1413.71	223.013	1210.83	333.65
Shawnee	2	915.793	255.883	963.252	256.512
Sherburne County	4	1395.98	217.792	1191.34	756.575
Trimble County	2	1140.98	491.957	1113.49	210.369
White Bluff	3	719.878	186.228	874.639	423.847
总计	91	1176.52	227.845	1143.93	505.722
探测到的数量（0.5、0.7、1）
行标签	计数项:排放	平均值项:反演结果	平均值项:不确定度	平均值项:avg Q(ton/h)	标准偏差项:avg Q(ton/h)
Antelope Valley	2	701.709	78.0648	620.607	160.289
Craig	6	722.554	207.054	771.713	258.618
Four Corners Steam Elec Station	6	717.937	169.449	1078.3	376.047
Gallatin	1	885.581	348.084	692.586	#DIV/0!
Gerald Gentleman Station	6	1016.83	119.424	1096.23	233.455
Harrington Station	1	604.156	61.1049	579.709	#DIV/0!
Harrison Power Station	3	726.187	172.322	845.768	814.527
Hunter	8	481.008	162.471	656.678	244.905
J K Spruce	7	1128.49	231.551	977.435	364.745
Jim Bridger	6	938.146	104.719	1166.64	438.514
La Cygne	7	949.105	196.675	894.401	416.142
Labadie	5	1972.84	526.552	1960.71	329.301
Laramie River	4	965.056	132.419	908.563	451.68
Martin Lake	9	1557.51	302.321	1621.81	578.835
Oak Grove	12	1472.68	246.325	1357.86	427.739
Sam Seymour	8	1413.71	223.013	1210.83	333.65
Shawnee	6	935.55	206.026	775.319	249.235
Sherburne County	4	1395.98	217.792	1191.34	756.575
Trimble County	3	1167.75	393.634	827.89	516.555
White Bluff	5	753.219	171.266	634.558	445.089
总计	109	1091.98	217.903	1074.98	514.577

## Sheet: 数据定义
定义：
	排放	说明	Clarification	Class	Num
	1	高置信度	High Confidence	HC	62
	0.7	中置信度	Medium Confidence	MC	29
	0.5	低置信度	Low Confidence	LC	15
	0	未探测到	Not Detected	NE	9
	-1	无法量化	Low Wind Speed	UQ	3
									排放	1
	行标签	计数项:排放
	1	62							行标签	平均值项:反演结果	平均值项:不确定度	平均值项:反演误差		行标签	平均值项:反演结果	平均值项:不确定度	平均值项:反演误差
	0.7	29							Antelope Valley	717.096	82.74	0.309611		Sherburne	2590.27	241.855	0.185037
	0.5	15							Craig	933.74	201.286	0.0263656		Labadie	1872.9	416.75	0.170478
	0	9							Four Corners Steam Elec Station	790.577	206.506	0.327876		Martin Lake	1763.65	288.593	0.107372
	-1	3							Gerald Gentleman Station	689.343	68.0938	0.197378		Oak Grove	1579.14	270.547	0.225204
	总计	118							Harrington Station	607.872	61.6422	0.0485812		La Cygne	1482.35	276.942	0.300313
									Harrison Power Station	1112.48	207.471	0.0575348		Sam Seymour	1223.57	196.707	0.134518
									Hunter	530.989	133.062	0.113641		J K Spruce	1130.27	243.695	0.185692
									J K Spruce	1130.27	243.695	0.185692		Harrison	1112.48	207.471	0.0575348
									Jim Bridger	964.415	103.253	0.123887		Trimble	1059.42	448.611	0.267708
									La Cygne	1482.35	276.942	0.300313		Jim Bridger	964.415	103.253	0.123887
									Labadie	1872.9	416.75	0.170478		Craig	933.74	201.286	0.0263656
									Laramie River	925.902	130.031	0.0893852		Laramie River	925.902	130.031	0.0893852
									Martin Lake	1763.65	288.593	0.107372		Shawnee	924.211	252.092	0.0393591
									Oak Grove	1579.14	270.547	0.225204		Four Corners	790.577	206.506	0.327876
									Sam Seymour	1223.57	196.707	0.134518		Antelope Valley	717.096	82.74	0.309611
									Shawnee	924.211	252.092	0.0393591		White Bluff	701.817	202.87	0.190377
									Sherburne County	2590.27	241.855	0.185037		Gerald Gentleman	689.343	68.0938	0.197378
									Trimble County	1059.42	448.611	0.267708		Harrington	607.872	61.6422	0.0485812
									White Bluff	701.817	202.87	0.190377		Hunter	530.989	133.062	0.113641
									总计	1202.5	224.939	0.173942		总计	1202.5	224.939	0.173942

## Sheet: 2024.11 (2)
序号	filename	foldername	Facility Name	Latitude	Longitude	satellite	date	Time of Satellite	UTC	State	Zone	Local Standard Time	Facility ID	day LST	time	前整点Q	后整点Q	avg Q(ton/h)	反演结果	反演误差	不确定度	风速	提取	排放	背景	备注
1	GF5_AHSI_W107.84_N40.19_20190803_006569_L10000052859	Craig_20190802	Craig	40.4627	-107.591	GF5	20190803	2019-08-03 04:08:09	2019-08-02 20:08:09	CO	MST	2019-08-02 13:08:09	6021	08/02/2019	13:08	1356.3	1381	1233.4	1240.2	0.00550781	189.226	3.26	-1	1
2	GF5_AHSI_W111.09_N39.21_20191118_008126_L10000065664	Hunter_20191118	Hunter	39.1747	-111.029	GF5	20191118	2019-11-18 04:20:29	2019-11-17 20:20:29	UT	MST	2019-11-17 13:20:29	6165	11/17/2019	13:20	889	885.7	805.489	930.248	0.154886	500.096	0.91	1	0
3	GF5_AHSI_W85.14_N38.72_20191225_008664_L10000068784	Trimble County_20191225	Trimble County	38.5847	-85.4117	GF5	20191225	2019-12-25 02:36:43	2019-12-24 18:36:43	KY	EST	2019-12-24 13:36:43	6071	12/24/2019	13:36	1037.4	1080.8	964.737	625.119	0.352031	305.67	1.06	-1	1
4	GF5A_AHSI_W108.6_N36.7_20231227_005597_L10000078715	Four Corners Steam Elec Station_20231227	Four Corners Steam Elec Station	36.69	-108.481	GF5A	20231227	2023-12-27 20:12:59	2023-12-27 20:12:59	NM	MST	2023-12-27 13:12:59	2442	12/27/2023	13:12	797	796.8	722.99	634.004	0.12308	81.8135	4.38	-1	0.5
5	GF5A_AHSI_W108.7_N41.7_20231213_005393_L10000074107	Jim Bridger_20231213	Jim Bridger	41.7378	-108.787	GF5A	20231213	2023-12-13 20:08:54	2023-12-13 20:08:54	WY	MST	2023-12-13 13:08:54	8066	12/13/2023	13:08	1825.9	1677	1638.42	1155.39	0.294815	157.108	4	-1	1
6	GF5A_AHSI_W108.8_N41.7_20230923_004213_L10000054221	Jim Bridger_20230923	Jim Bridger	41.7378	-108.787	GF5A	20230923	2023-09-23 20:11:46	2023-09-23 20:11:46	WY	MST	2023-09-23 13:11:46	8066	09/23/2023	13:11	460.9	452.2	416.674	173.106	0.584553	18.4836	7.1	-1	0.5
7	GF5A_AHSI_W94.3_N32.3_20230908_003994_L10000051261	Martin Lake_20230908	Martin Lake	32.2597	-94.5703	GF5A	20230908	2023-09-08 19:22:37	2023-09-08 19:22:37	TX	CST	2023-09-08 13:22:37	6146	09/08/2023	13:22	2712.1	2709.3	2459.44	2728.96	0.109585	383.128	3.48	-1	1		有羽流、但周围水汽干扰也很大
8	GF5A_AHSI_W98.5_N29.3_20230814_003630_L10000044804	J K Spruce_20230814	J K Spruce	29.3091	-98.3205	GF5A	20230814	2023-08-14 19:42:15	2023-08-14 19:42:15	TX	CST	2023-08-14 13:42:15	7097	08/14/2023	13:42	1389.2	1408.7	1272.64	1259.84	0.0100611	415.913	1.7	1	1		完美
9	GF5B_AHSI_W100.9_N41.2_20220628_004292_L10000156032	Gerald Gentleman Station_20220628	Gerald Gentleman Station	41.0808	-101.141	GF5B	20220628	2022-06-29 01:41:40	2022-06-28 17:41:40	NE	CST	2022-06-28 11:41:40	6077	06/28/2022	11:41	1314.5	1320.1	1195.97	394.551	0.670099	105.101	2	1	0.5		24波段可见排放，有排放，但是算不准，靠近湖边
10	GF5B_AHSI_W101.1_N41.2_20211220_001524_L10000044164	Gerald Gentleman Station_20211220	Gerald Gentleman Station	41.0808	-101.141	GF5B	20211220	2021-12-21 01:37:21	2021-12-20 17:37:21	NE	CST	2021-12-20 11:37:21	6077	12/20/2021	11:37	1201.3	1283	1135.51	838.569	0.261502	109.26	4.12	1	0.5
11	GF5B_AHSI_W101.6_N47.5_20220619_004161_L10000151101	Antelope Valley_20220619	Antelope Valley	47.371	-101.836	GF5B	20220619	2022-06-20 01:51:31	2022-06-19 17:51:31	ND	CST	2022-06-19 11:51:31	6469	06/19/2022	11:51	522.7	565.6	507.266	771.871	0.521629	93.5667	4.53	1	1
12	GF5B_AHSI_W101.9_N35.3_20220424_003345_L10000118254	Harrington Station_20220424	Harrington Station	35.2972	-101.748	GF5B	20220424	2022-04-25 01:38:35	2022-04-24 17:38:35	TX	CST	2022-04-24 11:38:35	6193	04/24/2022	11:38	296.2	292.8	266.755	126.057	0.527443	15.6878	6.66	-1	0
13	GF5B_AHSI_W102.0_N47.5_20220316_002777_L10000118963	Antelope Valley_20220316	Antelope Valley	47.371	-101.836	GF5B	20220316	2022-03-17 01:50:55	2022-03-16 17:50:55	ND	CST	2022-03-16 11:50:55	6469	03/16/2022	11:50	560.6	524.1	480.974	453.182	0.057784	50.9313	9.18	-1	0
14	GF5B_AHSI_W102.1_N47.5_20220626_004263_L10000154923	Antelope Valley_20220626	Antelope Valley	47.371	-101.836	GF5B	20220626	2022-06-27 01:53:27	2022-06-26 17:53:27	ND	CST	2022-06-26 11:53:27	6469	06/26/2022	11:53	667	827.8	733.949	662.321	0.0975922	71.9132	6.59	-1	1		能看见一点
15	GF5B_AHSI_W107.5_N40.2_20230926_010921_L10000396892	Craig_20230926	Craig	40.4627	-107.591	GF5B	20230926	2023-09-27 02:12:39	2023-09-26 18:12:39	CO	MST	2023-09-26 11:12:39	6021	09/26/2023	11:12	761.2	909.1	717.384	658.636	0.081892	309.624	1.1	-1	0.5
16	GF5B_AHSI_W107.8_N40.7_20221018_005924_L10000222668	Craig_20221018	Craig	40.4627	-107.591	GF5B	20221018	2022-10-19 02:11:02	2022-10-18 18:11:02	CO	MST	2022-10-18 11:11:02	6021	10/18/2022	11:11	830.6	831.6	753.674	780.247	0.0352578	275.998	1.63	-1	1		两个源
17	GF5B_AHSI_W108.2_N36.7_20220610_004030_L10000145798	Four Corners Steam Elec Station_20220610	Four Corners Steam Elec Station	36.69	-108.481	GF5B	20220610	2022-06-11 02:06:07	2022-06-10 18:06:07	NM	MST	2022-06-10 11:06:07	2442	06/10/2022	11:06	1471.5	1052.86	1296.94	1103.88	0.148859	181.479	2.97	1	1		完美
18	GF5B_AHSI_W108.3_N36.7_20220420_003287_L10000117219	Four Corners Steam Elec Station_20220420	Four Corners Steam Elec Station	36.69	-108.481	GF5B	20220420	2022-04-21 02:05:10	2022-04-20 18:05:10	NM	MST	2022-04-20 11:05:10	2442	04/20/2022	11:05	539.3	621.1	495.429	279.492	0.435859	62.7077	2.3	-1	1		有排放
19	GF5B_AHSI_W108.3_N36.7_20240106_012407_L10000448627	Four Corners Steam Elec Station_20240106	Four Corners Steam Elec Station	36.69	-108.481	GF5B	20240106	2024-01-07 02:12:33	2024-01-06 18:12:33	NM	MST	2024-01-06 11:12:33	2442	01/06/2024	11:12	1357.4	1191	1201.22	745.875	0.379069	316.311	1.32	1	1
20	GF5B_AHSI_W108.8_N41.7_20220212_002311_L10000077220	Jim Bridger_20220212	Jim Bridger	41.7378	-108.787	GF5B	20220212	2022-02-13 02:10:06	2022-02-12 18:10:06	WY	MST	2022-02-12 11:10:06	8066	02/12/2022	11:10	580.1	545	520.951	469.027	0.099671	57.1509	4.49	-1	1		有排放，但周围噪声明显更大，不适合反演
21	GF5B_AHSI_W109.0_N41.6_20231031_011431_L10000413197	Jim Bridger_20231031	Jim Bridger	41.7378	-108.787	GF5B	20231031	2023-11-01 02:20:04	2023-10-31 18:20:04	WY	MST	2023-10-31 11:20:04	8066	10/31/2023	11:20	1208.8	1174.8	1086.32	993.15	0.0857695	94.3495	6.01	-1	1
22	GF5B_AHSI_W109.1_N41.6_20231221_012174_L10000440228	Jim Bridger_20231221	Jim Bridger	41.7378	-108.787	GF5B	20231221	2023-12-22 02:20:37	2023-12-21 18:20:37	WY	MST	2023-12-21 11:20:37	8066	12/21/2023	11:20	994.7	868	864.063	831.36	0.0378486	138.932	3.18	1	0.5
23	GF5B_AHSI_W110.9_N39.2_20220418_003258_L10000114473	Hunter_20220418	Hunter	39.1747	-111.029	GF5B	20220418	2022-04-19 02:17:59	2022-04-18 18:17:59	UT	MST	2022-04-18 11:17:59	6165	04/18/2022	11:17	909.6	899.7	822.631	143.343	0.82575	106.204	0.6	1	2		低风速
24	GF5B_AHSI_W110.9_N39.2_20240104_012378_L10000447404	Hunter_20240104	Hunter	39.1747	-111.029	GF5B	20240104	2024-01-05 02:25:25	2024-01-04 18:25:25	UT	MST	2024-01-04 11:25:25	6165	01/04/2024	11:25	353.2	352.6	320.191	127.018	0.603304	95.6772	0.6	1	2
25	GF5B_AHSI_W80.4_N39.2_20231012_011153_L10000404427	Harrison Power Station_20231012	Harrison Power Station	39.3844	-80.3325	GF5B	20231012	2023-10-13 00:23:33	2023-10-12 16:23:33	WV	EST	2023-10-12 11:23:33	3944	10/12/2023	11:23	229.9	228.3	208.005	522.51	1.512	333.856	0.73	1	0.5		伪排放
26	GF5B_AHSI_W85.2_N38.7_20231031_011430_L10000413176	Trimble County_20231031	Trimble County	38.5847	-85.4117	GF5B	20231031	2023-11-01 00:42:01	2023-10-31 16:42:01	KY	EST	2023-10-31 11:42:01	6071	10/31/2023	11:42	278.2	284.99	256.691	1263.58	3.9226	204.154	3.2	-1	0.5		探测到了，但算的不准（该案例说明GF5的探测下限达到256t/h, 3m/s）
27	GF5B_AHSI_W85.3_N38.7_20230714_009842_L10000360353	Trimble County_20230714	Trimble County	38.5847	-85.4117	GF5B	20230714	2023-07-15 00:42:09	2023-07-14 16:42:09	KY	EST	2023-07-14 11:42:09	6071	07/14/2023	11:42	1373.5	1399.05	1262.24	1493.72	0.183384	591.552	1.52	1	1
28	GF5B_AHSI_W88.6_N37.1_20231212_012042_L10000435322	Shawnee_20231212	Shawnee	37.1517	-88.775	GF5B	20231212	2023-12-13 00:54:21	2023-12-12 16:54:21	KY	CST	2023-12-12 10:54:21	1379	12/12/2023	10:54	943.299	928	843.255	621.081	0.263472	201.366	1.77	-1	0.5		羽流飘到了水面上，水汽干扰大
29	GF5B_AHSI_W88.6_N37.2_20220326_002922_L10000100107	Shawnee_20220326	Shawnee	37.1517	-88.775	GF5B	20220326	2022-03-27 00:46:28	2022-03-26 16:46:28	KY	CST	2022-03-26 10:46:28	1379	03/26/2022	10:46	811.401	780.998	714.945	969.707	0.356338	100.109	5.61	-1	0.5		羽流飘到了水面上，水汽干扰大
30	GF5B_AHSI_W88.7_N37.2_20230825_010454_L10000380643	Shawnee_20230825	Shawnee	37.1517	-88.775	GF5B	20230825	2023-08-26 00:54:41	2023-08-25 16:54:41	KY	CST	2023-08-25 10:54:41	1379	08/25/2023	10:54	1266.6	1261.2	1144.63	1092.46	0.0455795	215.053	2.61	1	1		有排放，圆形，无羽流形状
31	GF5B_AHSI_W92.2_N34.3_20231006_011066_L10000401605	White Bluff_20231006	White Bluff	34.4236	-92.1392	GF5B	20231006	2023-10-07 01:05:59	2023-10-06 17:05:59	AR	CST	2023-10-06 11:05:59	6009	10/06/2023	11:05	320	380.1	294.843	905.397	2.07078	176.194	2.8	-1	0.5
32	GF5B_AHSI_W94.2_N45.6_20220602_003913_L10000141558	Sherburne County_20220602	Sherburne County	45.3792	-93.8958	GF5B	20220602	2022-06-03 01:19:01	2022-06-02 17:19:01	MN	CST	2022-06-02 11:19:01	6090	06/02/2022	11:19	411.9	411.2	373.468	920.677	1.46521	101.516	4.82	-1	0.5
33	GF5B_AHSI_W94.3_N32.3_20231103_011474_L10000414550	Martin Lake_20231103	Martin Lake	32.2597	-94.5703	GF5B	20231103	2023-11-04 01:12:54	2023-11-03 17:12:54	TX	CST	2023-11-03 11:12:54	6146	11/03/2023	11:12	1488.1	1487.9	1349.95	1648.35	0.22105	362.502	2.34	-1	1		有羽流，水面噪声大
34	GF5B_AHSI_W94.5_N32.3_20220407_003097_L10000107611	Martin Lake_20220407	Martin Lake	32.2597	-94.5703	GF5B	20220407	2022-04-08 01:05:50	2022-04-07 17:05:50	TX	CST	2022-04-07 11:05:50	6146	04/07/2022	11:05	1469.4	1514	1336.39	847.206	0.366048	85.9008	6.16	-1	0.5
35	GF5B_AHSI_W94.5_N38.2_20221019_005938_L10000223276	La Cygne_20221019	La Cygne	38.3472	-94.6467	GF5B	20221019	2022-10-20 01:15:33	2022-10-19 17:15:33	KS	CST	2022-10-19 11:15:33	1241	10/19/2022	11:15	708.8	713.2	644.01	643.163	0.00131617	126.995	2.6	-1	1		32波段可见排放源
36	GF5B_AHSI_W96.5_N31.3_20221019_005938_L10000223290	Oak Grove_20221019	Oak Grove	31.185	-96.4853	GF5B	20221019	2022-10-20 01:17:28	2022-10-19 17:17:28	TX	CST	2022-10-19 11:17:28	6180	10/19/2022	11:17	1788.5	1803.2	1626.28	1807.42	0.111382	687.603	1.55	1	1		有排放
37	GF5B_AHSI_W96.9_N29.8_20221019_005938_L10000223293	Sam Seymour_20221019	Sam Seymour	29.9172	-96.7506	GF5B	20221019	2022-10-20 01:17:53	2022-10-19 17:17:53	TX	CST	2022-10-19 11:17:53	6179	10/19/2022	11:17	964.3	979	878.577	991.484	0.128512	188.623	2.61	-1	1
38	GF5B_AHSI_W101.9_N35.3_20220424_003345_L10000118254	Harrington Station_20220424	Harrington Station	35.2972	-101.748	GF5B	20220424	2022-04-25 01:38:35	2022-04-24 17:38:35	TX	CST	2022-04-24 11:38:35	6193	04/24/2022	11:38	296.2	292.8	266.755	143.013	0.463877	16.1301	6.66	-1	0
39	ZY1E_AHSI_W101.24_N41.04_20230805_020428_L1A0000637084	Gerald Gentleman Station_20230805	Gerald Gentleman Station	41.0808	-101.141	ZY1E	20230805	2023-08-05 17:48:20	2023-08-05 17:48:20	NE	CST	2023-08-05 11:48:20	6077	08/05/2023	11:48	1358.5	1357.1	1231.39	935.939	0.239936	95.3335	6.02	-1	0.5
40	ZY1E_AHSI_W101.46_N35.28_20220305_012995_L1A0000414997	Harrington Station_20220305	Harrington Station	35.2972	-101.748	ZY1E	20220305	2022-03-05 17:52:24	2022-03-05 17:52:24	TX	CST	2022-03-05 11:52:24	6193	03/05/2022	11:52	167.2	177.3	159.622	123.741	0.224786	13.9453	10.76	1	0		排放强度太低了，无法检测到
41	ZY1E_AHSI_W101.95_N35.28_20220331_013368_L1A0000427095	Harrington Station_20220331	Harrington Station	35.2972	-101.748	ZY1E	20220331	2022-03-31 17:54:08	2022-03-31 17:54:08	TX	CST	2022-03-31 11:54:08	6193	03/31/2022	11:54	641.9	638.7	579.709	607.872	0.0485812	61.6422	5.28	1	1
42	ZY1E_AHSI_W101.95_N47.64_20201123_006296_L1A0000193277	Antelope Valley_20201123	Antelope Valley	47.371	-101.836	ZY1E	20201123	2020-11-23 18:05:58	2020-11-23 18:05:58	ND	CST	2020-11-23 12:05:58	6469	11/23/2020	12:05	372.7	365.9	337.594	856.682	1.53761	90.2331	6.44	-1	0		这一景还是不太好反演
43	ZY1E_AHSI_W104.76_N41.92_20230917_021045_L1A0000655064	Laramie River_20230917	Laramie River	42.1103	-104.883	ZY1E	20230917	2023-09-17 18:02:08	2023-09-17 18:02:08	WY	MST	2023-09-17 11:02:08	6204	09/17/2023	11:02	1667.1	1881.6	1518.85	1391.19	0.0840506	114.44	7.79	-1	1		羽流良好
44	ZY1E_AHSI_W104.93_N41.92_20230625_019840_L1A0000620580	Laramie River_20230625	Laramie River	42.1103	-104.883	ZY1E	20230625	2023-06-25 18:05:08	2023-06-25 18:05:08	WY	MST	2023-06-25 11:05:08	6204	06/25/2023	11:05	1043.4	1114.7	951.947	1081.84	0.136449	216.823	2.52	-1	1		有排放
45	ZY1E_AHSI_W105.13_N42.36_20200825_005004_L1A0000136593	Laramie River_20200825	Laramie River	42.1103	-104.883	ZY1E	20200825	2020-08-25 18:10:51	2020-08-25 18:10:51	WY	MST	2020-08-25 11:10:51	6204	08/25/2020	11:10	520.3	520.5	472.038	531.489	0.125945	84.814	3.13	-1	1
46	ZY1E_AHSI_W107.47_N40.60_20231007_021332_L1A0000663395	Craig_20231007	Craig	40.4627	-107.591	ZY1E	20231007	2023-10-07 18:11:00	2023-10-07 18:11:00	CO	MST	2023-10-07 11:11:00	6021	10/07/2023	11:11	487.2	518.1	447.12	415.147	0.071508	171.53	1.36	1	0.5		有排放 不像羽流
47	ZY1E_AHSI_W107.63_N40.60_20230715_020127_L1A0000628485	Craig_20230715	Craig	40.4627	-107.591	ZY1E	20230715	2023-07-15 18:14:00	2023-07-15 18:14:00	CO	MST	2023-07-15 11:14:00	6021	07/15/2023	11:14	892.4	903.4	811.9	780.779	0.0383313	138.633	2.81	-1	1		19波段较好
48	ZY1E_AHSI_W108.64_N36.61_20200917_005334_L1A0000154763	Four Corners Steam Elec Station_20200917	Four Corners Steam Elec Station	36.69	-108.481	ZY1E	20200917	2020-09-17 18:19:28	2020-09-17 18:19:28	NM	MST	2020-09-17 11:19:28	2442	09/17/2020	11:19	1507.6	1506	1367.21	873.401	0.361181	158.745	2.71	-1	1		羽流形状好
49	ZY1E_AHSI_W108.68_N41.92_20200911_005248_L1A0000148906	Jim Bridger_20200911	Jim Bridger	41.7378	-108.787	ZY1E	20200911	2020-09-11 18:24:53	2020-09-11 18:24:53	WY	MST	2020-09-11 11:24:53	8066	09/11/2020	11:24	1437.4	1314.4	1259.35	1240.1	0.0152922	104.404	7.11	-1	1		排放位置在山上，不像排放源
50	ZY1E_AHSI_W108.72_N36.61_20231007_021332_L1A0000663404	Four Corners Steam Elec Station_20231007	Four Corners Steam Elec Station	36.69	-108.481	ZY1E	20231007	2023-10-07 18:12:07	2023-10-07 18:12:07	NM	MST	2023-10-07 11:12:07	2442	10/07/2023	11:12	1532.3	1509.9	1386.01	950.235	0.314412	313.286	1.7	1	1		羽流很完整，可以作为案例
51	ZY1E_AHSI_W108.78_N41.92_20200813_004832_L1A0000126505	Jim Bridger_20200813	Jim Bridger	41.7378	-108.787	ZY1E	20200813	2020-08-13 18:24:46	2020-08-13 18:24:46	WY	MST	2020-08-13 11:24:46	8066	08/13/2020	11:24	1902.1	1640.8	1630.74	1034.61	0.365556	101.027	5.41	1	0.5		羽流形状很好，不过怎么风速有点问题
52	ZY1E_AHSI_W111.21_N39.27_20201004_005578_L1A0000168618	Hunter_20201004	Hunter	39.1747	-111.029	ZY1E	20201004	2020-10-04 18:32:36	2020-10-04 18:32:36	UT	MST	2020-10-04 11:32:36	6165	10/04/2020	11:32	656	681.6	607.499	489.256	0.194639	121.223	2.13	-1	1		完美
53	ZY1E_AHSI_W111.31_N39.27_20200905_005163_L1A0000144224	Hunter_20200905	Hunter	39.1747	-111.029	ZY1E	20200905	2020-09-05 18:32:32	2020-09-05 18:32:32	UT	MST	2020-09-05 11:32:32	6165	09/05/2020	11:32	1057.9	1295.6	1074.72	489.011	0.544986	138.535	1.91	1	0.5		有羽流
54	ZY1E_AHSI_W85.49_N38.38_20220327_013308_L1A0000425150	Trimble County_20220327	Trimble County	38.5847	-85.4117	ZY1E	20220327	2022-03-27 16:51:14	2022-03-27 16:51:14	KY	EST	2022-03-27 11:51:14	6071	03/27/2022	11:51	412.9	409.2	371.723	572.292	0.539564	85.4203	3.62	-1	0
55	ZY1E_AHSI_W86.17_N36.17_20220327_013308_L1A0000425155	Gallatin_20220327	Gallatin	36.3156	-86.4006	ZY1E	20220327	2022-03-27 16:51:51	2022-03-27 16:51:51	TN	CST	2022-03-27 10:51:51	3403	03/27/2022	10:51	307	306.4	278.043	179.484	0.354473	45.9561	2.48	1	0
56	ZY1E_AHSI_W86.59_N36.17_20221004_016048_L1A0000511602	Gallatin_20221004	Gallatin	36.3156	-86.4006	ZY1E	20221004	2022-10-04 16:51:33	2022-10-04 16:51:33	TN	CST	2022-10-04 10:51:33	3403	10/04/2022	10:51	758.6	764.3	692.586	730.097	0.0541607	289.943	1.48	-1	0.5		像伪排放源
57	ZY1E_AHSI_W88.87_N37.06_20211128_011601_L1A0000371189	Shawnee_20211128	Shawnee	37.1517	-88.775	ZY1E	20211128	2021-11-28 17:03:59	2021-11-28 17:03:59	KY	CST	2021-11-28 11:03:59	1379	11/28/2021	11:03	406.4	406.4	368.68	387.311	0.0505345	68.9386	3.51	1	0.5		有排放
58	ZY1E_AHSI_W88.95_N37.06_20210119_007111_L1A0000229838	Shawnee_20210119	Shawnee	37.1517	-88.775	ZY1E	20210119	2021-01-19 17:02:53	2021-01-19 17:02:53	KY	CST	2021-01-19 11:02:53	1379	01/19/2021	11:02	868.501	669.401	781.87	755.96	0.0331387	289.132	1.57	1	1		右下角伪排放源
59	ZY1E_AHSI_W89.08_N37.06_20201221_006696_L1A0000212411	Shawnee_20201221	Shawnee	37.1517	-88.775	ZY1E	20201221	2020-12-21 17:03:04	2020-12-21 17:03:04	KY	CST	2020-12-21 11:03:04	1379	12/21/2020	11:03	386.9	386.599	350.976	905.071	1.57872	101.828	6.44	-1	0.5
60	ZY1E_AHSI_W90.79_N38.83_20210925_010683_L1A0000340283	Labadie_20210925	Labadie	38.5583	-90.8361	ZY1E	20210925	2021-09-25 17:13:23	2021-09-25 17:13:23	MO	CST	2021-09-25 11:13:23	2103	09/25/2021	11:13	1746.6	1732.6	1581.74	2026.84	0.281401	344.953	2.94	-1	1
61	ZY1E_AHSI_W90.90_N38.38_20220113_012261_L1A0000391512	Labadie_20220113	Labadie	38.5583	-90.8361	ZY1E	20220113	2022-01-13 17:13:19	2022-01-13 17:13:19	MO	CST	2022-01-13 11:13:19	2103	01/13/2022	11:13	1841.4	1849.6	1672.1	1333.74	0.20236	438.295	1.73	-1	1
62	ZY1E_AHSI_W90.98_N38.38_20230329_018573_L1A0000585856	Labadie_20230329	Labadie	38.5583	-90.8361	ZY1E	20230329	2023-03-29 17:07:56	2023-03-29 17:07:56	MO	CST	2023-03-29 11:07:56	2103	03/29/2023	11:07	2464.5	2453.2	2234.56	1773.77	0.206209	655.194	1.58	1	0.5		羽流沿着江面规整陈列
63	ZY1E_AHSI_W91.94_N34.40_20220726_015044_L1A0000481359	White Bluff_20220726	White Bluff	34.4236	-92.1392	ZY1E	20220726	2022-07-26 17:12:13	2022-07-26 17:12:13	AR	CST	2022-07-26 11:12:13	6009	07/26/2022	11:12	1389.4	1742.2	1324.45	978.709	0.261047	163.102	3.26	-1	1		微弱的排放
64	ZY1E_AHSI_W92.11_N34.40_20220113_012261_L1A0000391521	White Bluff_20220113	White Bluff	34.4236	-92.1392	ZY1E	20220113	2022-01-13 17:14:27	2022-01-13 17:14:27	AR	CST	2022-01-13 11:14:27	6009	01/13/2022	11:14	901.3	897.1	816.757	505.896	0.380603	131.106	2.28	1	0		没有排放
65	ZY1E_AHSI_W92.15_N34.40_20220309_013050_L1A0000416988	White Bluff_20220309	White Bluff	34.4236	-92.1392	ZY1E	20220309	2022-03-09 17:14:19	2022-03-09 17:14:19	AR	CST	2022-03-09 11:14:19	6009	03/09/2022	11:14	280.3	279.1	254.03	1026.88	3.04234	187.311	2.83	-1	0.5		很多云，不适合反演
66	ZY1E_AHSI_W92.33_N34.40_20231104_021729_L1A0000674441	White Bluff_20231104	White Bluff	34.4236	-92.1392	ZY1E	20231104	2023-11-04 17:03:42	2023-11-04 17:03:42	AR	CST	2023-11-04 11:03:42	6009	11/04/2023	11:03	537.3	433.2	482.708	424.924	0.119708	242.637	0.86	1	1
67	ZY1E_AHSI_W93.56_N45.45_20220320_013210_L1A0000421897	Sherburne County_20220320	Sherburne County	45.3792	-93.8958	ZY1E	20220320	2022-03-20 17:31:14	2022-03-20 17:31:14	MN	CST	2022-03-20 11:31:14	6090	03/20/2022	11:31	1451.2	1311.2	1250.89	623.601	0.501473	185.353	1.91	-1	0.5
68	ZY1E_AHSI_W94.02_N45.45_20220927_015948_L1A0000508557	Sherburne County_20220927	Sherburne County	45.3792	-93.8958	ZY1E	20220927	2022-09-27 17:31:08	2022-09-27 17:31:08	MN	CST	2022-09-27 11:31:08	6090	09/27/2022	11:31	1052.9	1052.9	955.175	1780.29	0.863835	279.394	3.34	1	0.5		有羽流
69	ZY1E_AHSI_W94.33_N38.38_20211206_011716_L1A0000374910	La Cygne_20211206	La Cygne	38.3472	-94.6467	ZY1E	20211206	2021-12-06 17:27:03	2021-12-06 17:27:03	KS	CST	2021-12-06 11:27:03	1241	12/06/2021	11:27	365.5	442.9	363.173	619.288	0.705213	83.082	4.78	1	0.5
70	ZY1E_AHSI_W94.40_N32.17_20210401_008144_L1A0000261751	Martin Lake_20210401	Martin Lake	32.2597	-94.5703	ZY1E	20210401	2021-04-01 17:20:59	2021-04-01 17:20:59	TX	CST	2021-04-01 11:20:59	6146	04/01/2021	11:20	1201.3	1170.4	1080.46	1111.71	0.0289255	186.813	3.06	-1	1		有羽流
71	ZY1E_AHSI_W94.44_N38.38_20210913_010511_L1A0000334632	La Cygne_20210913	La Cygne	38.3472	-94.6467	ZY1E	20210913	2021-09-13 17:27:32	2021-09-13 17:27:32	KS	CST	2021-09-13 11:27:32	1241	09/13/2021	11:27	662.6	671	604.53	1043.35	0.725879	124.22	5.41	-1	0.5
72	ZY1E_AHSI_W94.49_N38.38_20200711_004357_L1A0000107667	La Cygne_20200711	La Cygne	38.3472	-94.6467	ZY1E	20200711	2020-07-11 17:23:19	2020-07-11 17:23:19	KS	CST	2020-07-11 11:23:19	1241	07/11/2020	11:23	1601.4	1598	1451.58	2321.53	0.59931	426.889	2.72	-1	1		反演效果不好，只有一团排放；感觉有点像是把水汽也核算进去了，偏高很多；误差太大了
73	ZY1E_AHSI_W94.59_N32.17_20220303_012967_L1A0000414108	Martin Lake_20220303	Martin Lake	32.2597	-94.5703	ZY1E	20220303	2022-03-03 17:22:15	2022-03-03 17:22:15	TX	CST	2022-03-03 11:22:15	6146	03/03/2022	11:22	1866.9	1838.5	1684.18	599.629	0.643963	454.485	0.58	-1	2		这一景本应该能够看到完美羽流的，但是羽流的方向刚好经过了湖面，导致出现一段非常大的异常高值
74	ZY1E_AHSI_W94.77_N32.17_20210104_006896_L1A0000221658	Martin Lake_20210104	Martin Lake	32.2597	-94.5703	ZY1E	20210104	2021-01-04 17:21:40	2021-01-04 17:21:40	TX	CST	2021-01-04 11:21:40	6146	01/04/2021	11:21	1286	1418.3	1208.65	735.039	0.39185	210.319	1.96	-1	0		水汽干扰大，几乎无反演结果
75	ZY1E_AHSI_W96.19_N31.29_20220130_012507_L1A0000399543	Oak Grove_20220130	Oak Grove	31.185	-96.4853	ZY1E	20220130	2022-01-30 17:28:05	2022-01-30 17:28:05	TX	CST	2022-01-30 11:28:05	6180	01/30/2022	11:28	1396	1398.9	1267.66	1168.69	0.0780716	137.446	4.62	1	1
76	ZY1E_AHSI_W96.23_N31.29_20220326_013296_L1A0000424559	Oak Grove_20220326	Oak Grove	31.185	-96.4853	ZY1E	20220326	2022-03-26 17:27:55	2022-03-26 17:27:55	TX	CST	2022-03-26 11:27:55	6180	03/26/2022	11:27	767.3	835.6	723.965	929.472	0.283863	144.01	3.3	-1	1
77	ZY1E_AHSI_W96.26_N31.29_20201006_005607_L1A0000169633	Oak Grove_20201006	Oak Grove	31.185	-96.4853	ZY1E	20201006	2020-10-06 17:25:38	2020-10-06 17:25:38	TX	CST	2020-10-06 11:25:38	6180	10/06/2020	11:25	1874.4	1879.2	1702.24	1958.78	0.150704	543.999	1.93	1	1		有排放，无羽流
78	ZY1E_AHSI_W96.28_N31.29_20210424_008474_L1A0000271419	Oak Grove_20210424	Oak Grove	31.185	-96.4853	ZY1E	20210424	2021-04-24 17:27:56	2021-04-24 17:27:56	TX	CST	2021-04-24 11:27:56	6180	04/24/2021	11:27	893.6	900.9	813.64	990.33	0.217159	102.367	5.95	-1	1		偏高
79	ZY1E_AHSI_W96.41_N31.29_20211206_011716_L1A0000374926	Oak Grove_20211206	Oak Grove	31.185	-96.4853	ZY1E	20211206	2021-12-06 17:29:06	2021-12-06 17:29:06	TX	CST	2021-12-06 11:29:06	6180	12/06/2021	11:29	1798.7	1790.1	1627.98	2137.8	0.313161	183.84	7.76	-1	1		有一点点羽流
80	ZY1E_AHSI_W96.55_N29.95_20220130_012507_L1A0000399546	Sam Seymour_20220130	Sam Seymour	29.9172	-96.7506	ZY1E	20220130	2022-01-30 17:28:28	2022-01-30 17:28:28	TX	CST	2022-01-30 11:28:28	6179	01/30/2022	11:28	1394.8	1390.4	1263.48	784.321	0.379237	143.142	2.83	-1	0.5
81	ZY1E_AHSI_W96.58_N31.29_20200711_004359_L1A0000107694	Oak Grove_20200711	Oak Grove	31.185	-96.4853	ZY1E	20200711	2020-07-11 17:25:19	2020-07-11 17:25:19	TX	CST	2020-07-11 11:25:19	6180	07/11/2020	11:25	1869.6	1875.6	1698.34	1956.38	0.151933	297.695	3.26	-1	1		羽流可以
82	ZY1E_AHSI_W96.59_N29.95_20220326_013296_L1A0000424562	Sam Seymour_20220326	Sam Seymour	29.9172	-96.7506	ZY1E	20220326	2022-03-26 17:28:17	2022-03-26 17:28:17	TX	CST	2022-03-26 11:28:17	6179	03/26/2022	11:28	1765.4	1773.9	1605.14	1640.86	0.022251	208.941	3.98	1	0.5		能看到排放，但羽流飘到了湖面上
83	ZY1E_AHSI_W96.65_N29.95_20210424_008474_L1A0000271422	Sam Seymour_20210424	Sam Seymour	29.9172	-96.7506	ZY1E	20210424	2021-04-24 17:28:19	2021-04-24 17:28:19	TX	CST	2021-04-24 11:28:19	6179	04/24/2021	11:28	1037.5	1164.7	995.055	1060.41	0.0656808	101.999	6.15	-1	1
84	ZY1E_AHSI_W96.74_N31.10_20200612_003941_L1A0000093912	Oak Grove_20200612	Oak Grove	31.185	-96.4853	ZY1E	20200612	2020-06-12 17:25:12	2020-06-12 17:25:12	TX	CST	2020-06-12 11:25:12	6180	06/12/2020	11:25	1759.1	1762.5	1597.11	2295.8	0.437468	289.887	4	1	1		排放羽流很清晰
85	ZY1E_AHSI_W96.95_N29.95_20200711_004359_L1A0000107697	Sam Seymour_20200711	Sam Seymour	29.9172	-96.7506	ZY1E	20200711	2020-07-11 17:25:42	2020-07-11 17:25:42	TX	CST	2020-07-11 11:25:42	6179	07/11/2020	11:25	1793.1	1824.9	1638.69	1226.92	0.25128	215.85	2.82	1	1		有羽流，还不错，飘到水面上了，前16波段清晰；作为强吸收和弱吸收的案例
86	ZY1E_AHSI_W97.05_N29.95_20200612_003941_L1A0000093915	Sam Seymour_20200612	Sam Seymour	29.9172	-96.7506	ZY1E	20200612	2020-06-12 17:25:31	2020-06-12 17:25:31	TX	CST	2020-06-12 11:25:31	6179	06/12/2020	11:25	1467.5	1562.8	1367.32	1639.83	0.199305	223.096	3.64	1	1		羽流形状很好，可以作为案例
87	ZY1E_AHSI_W98.07_N29.51_20220930_015991_L1A0000509878	J K Spruce_20220930	J K Spruce	29.3091	-98.3205	ZY1E	20220930	2022-09-30 17:31:53	2022-09-30 17:31:53	TX	CST	2022-09-30 11:31:53	7097	09/30/2022	11:31	1501.1	1499.5	1361.03	1374.48	0.00988675	495.343	1.61	-1	1		有噪声，有羽流
88	ZY1E_AHSI_W98.20_N29.06_20220418_013626_L1A0000435959	J K Spruce_20220418	J K Spruce	29.3091	-98.3205	ZY1E	20220418	2022-04-18 17:33:49	2022-04-18 17:33:49	TX	CST	2022-04-18 11:33:49	7097	04/18/2022	11:33	629.1	628.9	570.61	700.746	0.228065	68.9474	6.44	1	1
89	ZY1E_AHSI_W98.50_N29.51_20200930_005521_L1A0000170469	J K Spruce_20200930	J K Spruce	29.3091	-98.3205	ZY1E	20200930	2020-09-30 17:33:03	2020-09-30 17:33:03	TX	CST	2020-09-30 11:33:03	7097	09/30/2020	11:33	914.9	958.2	851.588	1234.35	0.449463	195.269	3.18	1	1
90	ZY1E_AHSI_W98.51_N29.06_20201029_005935_L1A0000194928	J K Spruce_20201029	J K Spruce	29.3091	-98.3205	ZY1E	20201029	2020-10-29 17:33:12	2020-10-29 17:33:12	TX	CST	2020-10-29 11:33:12	7097	10/29/2020	11:33	508.1	564.9	489.281	524.493	0.0719665	53.9076	7.17	-1	1		有团块排放
91	ZY1E_AHSI_W98.53_N29.51_20220514_013997_L1A0000447750	J K Spruce_20220514	J K Spruce	29.3091	-98.3205	ZY1E	20220514	2022-05-14 17:35:16	2022-05-14 17:35:16	TX	CST	2022-05-14 11:35:16	7097	05/14/2022	11:35	1041	1035.2	941.31	1391.05	0.477786	339.591	2.12	-1	1
92	ZY1E_AHSI_W101.46_N35.28_20220305_012995_L1A0000414997	Harrington Station_20220305	Harrington Station	35.2972	-101.748	ZY1E	20220305	2022-03-05 17:52:24	2022-03-05 17:52:24	TX	CST	2022-03-05 11:52:24	6193	03/05/2022	11:52	167.2	177.3	159.622	123.741	0.224786	12.6437	10.76	1	0		排放强度太低了，无法检测到
93	ZY1F_AHSI_W101.04_N41.04_20230916_009032_L1A0000537816	Gerald Gentleman Station_20230916	Gerald Gentleman Station	41.0808	-101.141	ZY1F	20230916	2023-09-16 18:00:26	2023-09-16 18:00:26	NE	CST	2023-09-16 12:00:26	6077	09/16/2023	12:00	1330.8	1109.2	1207.28	812.021	0.327397	107.316	3.96	1	0.5
94	ZY1F_AHSI_W101.05_N41.04_20231110_009821_L1A0000582861	Gerald Gentleman Station_20231110	Gerald Gentleman Station	41.0808	-101.141	ZY1F	20231110	2023-11-10 18:01:07	2023-11-10 18:01:07	NE	CST	2023-11-10 12:01:07	6077	11/10/2023	12:01	1304.1	1307.4	1183.11	797.5	0.325928	87.2364	4.88	1	1
95	ZY1F_AHSI_W101.48_N41.04_20230624_007827_L1A0000469131	Gerald Gentleman Station_20230624	Gerald Gentleman Station	41.0808	-101.141	ZY1F	20230624	2023-06-24 18:00:53	2023-06-24 18:00:53	NE	CST	2023-06-24 12:00:53	6077	06/24/2023	12:00	688	687.2	624.143	581.185	0.0688275	48.9512	7.6	1	1		10波段效果好
96	ZY1F_AHSI_W104.83_N41.92_20230930_009233_L1A0000549577	Laramie River_20230930	Laramie River	42.1103	-104.883	ZY1F	20230930	2023-09-30 18:16:43	2023-09-30 18:16:43	WY	MST	2023-09-30 11:16:43	6204	09/30/2023	11:16	798.9	661.1	691.414	699.086	0.0110958	104.046	3.4	-1	1		有羽流
97	ZY1F_AHSI_W107.55_N40.59_20231020_009525_L1A0000564874	Craig_20231020	Craig	40.4627	-107.591	ZY1F	20231020	2023-10-20 18:26:24	2023-10-20 18:26:24	CO	MST	2023-10-20 11:26:24	6021	10/20/2023	11:26	729.3	742.5	666.799	27.5001	0.958758	28.0776	0.42	1	2		22有一个羽流 24双羽流0.001
98	ZY1F_AHSI_W110.71_N39.27_20230817_008602_L1A0000512937	Hunter_20230817	Hunter	39.1747	-111.029	ZY1F	20230817	2023-08-17 18:36:51	2023-08-17 18:36:51	UT	MST	2023-08-17 11:36:51	6165	08/17/2023	11:36	654	651.7	592.047	572.721	0.0326423	144.9	2.06	1	1
99	ZY1F_AHSI_W110.73_N39.27_20230623_007813_L1A0000468861	Hunter_20230623	Hunter	39.1747	-111.029	ZY1F	20230623	2023-06-23 18:36:03	2023-06-23 18:36:03	UT	MST	2023-06-23 11:36:03	6165	06/23/2023	11:36	422.6	419.8	381.852	492.145	0.288838	47.1209	6.19	-1	0.5		有点不像
100	ZY1F_AHSI_W111.15_N39.27_20230719_008186_L1A0000490264	Hunter_20230719	Hunter	39.1747	-111.029	ZY1F	20230719	2023-07-19 18:38:10	2023-07-19 18:38:10	UT	MST	2023-07-19 11:38:10	6165	07/19/2023	11:38	656.412	749.552	649.001	152.366	0.765229	130.367	0.5	1	2		清晰完美
101	ZY1F_AHSI_W80.08_N39.27_20220621_002553_L1A0000190867	Harrison Power Station_20220621	Harrison Power Station	39.3844	-80.3325	ZY1F	20220621	2022-06-21 16:24:44	2022-06-21 16:24:44	WV	EST	2022-06-21 11:24:44	3944	06/21/2022	11:24	1900.6	2008.4	1763.31	1635.03	0.0727506	355.005	2.33	1	1		非常清晰
102	ZY1F_AHSI_W80.61_N39.27_20230418_006865_L1A0000414746	Harrison Power Station_20230418	Harrison Power Station	39.3844	-80.3325	ZY1F	20230418	2023-04-18 16:34:27	2023-04-18 16:34:27	WV	EST	2023-04-18 11:34:27	3944	04/18/2023	11:34	631.6	618	565.987	589.939	0.042319	59.9357	5.73	-1	1
103	ZY1F_AHSI_W86.57_N36.17_20230305_006234_L1A0000379047	Gallatin_20230305	Gallatin	36.3156	-86.4006	ZY1F	20230305	2023-03-05 16:54:32	2023-03-05 16:54:32	TN	CST	2023-03-05 10:54:32	3403	03/05/2023	10:54	278.3	276	250.592	348.642	0.391277	75.8977	2.5	-1	0		无排放
104	ZY1F_AHSI_W88.63_N37.05_20231031_009677_L1A0000574307	Shawnee_20231031	Shawnee	37.1517	-88.775	ZY1F	20231031	2023-10-31 17:07:20	2023-10-31 17:07:20	KY	CST	2023-10-31 11:07:20	1379	10/31/2023	11:07	879.1	888.799	798.533	355.636	0.554638	62.4641	3.6	-1	0		羽流飘到了水面上，水汽干扰大
105	ZY1F_AHSI_W90.79_N38.83_20230704_007970_L1A0000476992	Labadie_20230704	Labadie	38.5583	-90.8361	ZY1F	20230704	2023-07-04 17:16:01	2023-07-04 17:16:01	MO	CST	2023-07-04 11:16:01	2103	07/04/2023	11:16	2560.7	2558.1	2322.4	2258.13	0.0276719	467.001	2.41	-1	1		构成羽流，有排放
106	ZY1F_AHSI_W90.93_N38.38_20231022_009549_L1A0000565683	Labadie_20231022	Labadie	38.5583	-90.8361	ZY1F	20231022	2023-10-22 17:17:43	2023-10-22 17:17:43	MO	CST	2023-10-22 11:17:43	2103	10/22/2023	11:17	2197.7	2194	1992.77	1699.85	0.146992	476.859	1.92	-1	0.5		受江水影响较大
107	ZY1F_AHSI_W93.93_N45.45_20220721_002978_L1A0000173921	Sherburne County_20220721	Sherburne County	45.3792	-93.8958	ZY1F	20220721	2022-07-21 17:27:56	2022-07-21 17:27:56	MN	CST	2022-07-21 11:27:56	6090	07/21/2022	11:27	2400.9	2419.9	2185.82	2590.27	0.185037	241.855	5.9	1	1		适合作为反演案例
108	ZY1F_AHSI_W94.55_N32.17_20231210_010251_L1A0000608285	Martin Lake_20231210	Martin Lake	32.2597	-94.5703	ZY1F	20231210	2023-12-10 17:27:08	2023-12-10 17:27:08	TX	CST	2023-12-10 11:27:08	6146	12/10/2023	11:27	1027.6	1026.4	931.733	1050.18	0.127129	125.133	4.79	-1	1		有羽流
109	ZY1F_AHSI_W94.55_N38.38_20220920_003853_L1A0000229994	La Cygne_20220920	La Cygne	38.3472	-94.6467	ZY1F	20220920	2022-09-20 17:24:31	2022-09-20 17:24:31	KS	CST	2022-09-20 11:24:31	1241	09/20/2022	11:24	759.1	765.6	691.003	518.877	0.249095	62.6793	5.01	-1	0.5		水汽影响太大了
110	ZY1F_AHSI_W94.56_N38.38_20230816_008587_L1A0000512042	La Cygne_20230816	La Cygne	38.3472	-94.6467	ZY1F	20230816	2023-08-16 17:31:23	2023-08-16 17:31:23	KS	CST	2023-08-16 11:31:23	1241	08/16/2023	11:31	1273.7	1441.1	1233.94	948.675	0.231184	171.354	2.8	1	0.5		飘到湖面上了
111	ZY1F_AHSI_W94.57_N32.17_20220802_003150_L1A0000184740	Martin Lake_20220802	Martin Lake	32.2597	-94.5703	ZY1F	20220802	2022-08-02 17:17:29	2022-08-02 17:17:29	TX	CST	2022-08-02 11:17:29	6146	08/02/2022	11:17	2263.6	2623.6	2146.04	2088.37	0.0268718	305.618	3.39	1	0.5		有排放，圆形，堆叠状，飘到湖面上
112	ZY1F_AHSI_W94.58_N38.38_20230108_005431_L1A0000329362	La Cygne_20230108	La Cygne	38.3472	-94.6467	ZY1F	20230108	2023-01-08 17:27:27	2023-01-08 17:27:27	KS	CST	2023-01-08 11:27:27	1241	01/08/2023	11:27	1406.5	1398.2	1272.57	341.173	0.731902	155.533	1.2	-1	0.5		噪声较大
113	ZY1F_AHSI_W94.61_N32.17_20221120_004728_L1A0000290523	Martin Lake_20221120	Martin Lake	32.2597	-94.5703	ZY1F	20221120	2022-11-20 17:20:45	2022-11-20 17:20:45	TX	CST	2022-11-20 11:20:45	6146	11/20/2022	11:20	2635.2	2664.4	2399.44	2279.06	0.0501729	385.388	2.97	1	1		有一点羽流比较稀疏
114	ZY1F_AHSI_W96.64_N31.29_20220727_003064_L1A0000178119	Oak Grove_20220727	Oak Grove	31.185	-96.4853	ZY1F	20220727	2022-07-27 17:24:51	2022-07-27 17:24:51	TX	CST	2022-07-27 11:24:51	6180	07/27/2022	11:24	1241	1493.7	1217.51	983.127	0.192513	130.435	3.79	-1	1
115	ZY1F_AHSI_W96.65_N31.29_20230304_006220_L1A0000378222	Oak Grove_20230304	Oak Grove	31.185	-96.4853	ZY1F	20230304	2023-03-04 17:30:35	2023-03-04 17:30:35	TX	CST	2023-03-04 11:30:35	6180	03/04/2023	11:30	650.4	654.3	591.802	770.922	0.302669	104.412	3.8	-1	1		被云挡住了
116	ZY1F_AHSI_W96.65_N31.29_20230816_008587_L1A0000512058	Oak Grove_20230816	Oak Grove	31.185	-96.4853	ZY1F	20230816	2023-08-16 17:33:23	2023-08-16 17:33:23	TX	CST	2023-08-16 11:33:23	6180	08/16/2023	11:33	1820.5	1806.6	1644.59	2292.16	0.393756	432.15	2.6	-1	1		羽流很好，简直完美！！！适合作为案例
117	ZY1F_AHSI_W96.67_N31.29_20230108_005431_L1A0000329378	Oak Grove_20230108	Oak Grove	31.185	-96.4853	ZY1F	20230108	2023-01-08 17:29:27	2023-01-08 17:29:27	TX	CST	2023-01-08 11:29:27	6180	01/08/2023	11:29	1957.3	1974.5	1783.17	1658.77	0.0697672	192.725	4.4	-1	1		有羽流，水池下方有一个点源
118	ZY1F_AHSI_W97.01_N29.95_20230304_006220_L1A0000378225	Sam Seymour_20230304	Sam Seymour	29.9172	-96.7506	ZY1F	20230304	2023-03-04 17:30:57	2023-03-04 17:30:57	TX	CST	2023-03-04 11:30:57	6179	03/04/2023	11:30	672.8	881.2	704.883	1118.88	0.587335	185.211	3.01	-1	0.5
119	ZY1F_AHSI_W97.01_N29.95_20230816_008587_L1A0000512061	Sam Seymour_20230816	Sam Seymour	29.9172	-96.7506	ZY1F	20230816	2023-08-16 17:33:45	2023-08-16 17:33:45	TX	CST	2023-08-16 11:33:45	6179	08/16/2023	11:33	1354.8	1363.7	1233.49	1199.19	0.0278112	253.966	2.37	1	1
120	ZY1F_AHSI_W98.47_N29.51_20221013_004183_L1A0000250381	J K Spruce_20221013	J K Spruce	29.3091	-98.3205	ZY1F	20221013	2022-10-13 17:33:02	2022-10-13 17:33:02	TX	CST	2022-10-13 11:33:02	7097	10/13/2022	11:33	1492.3	1495.9	1355.59	1426.91	0.0526155	136.896	5.76	1	1		噪声较大

## Sheet: 2024.10
序号	filename	foldername	Facility Name	Latitude	Longitude	satellite	date	Time of Satellite	UTC	State	Zone	Local Standard Time	Facility ID	day LST	time	前整点Q	后整点Q	avg Q(ton/h)	反演结果	反演误差	不确定度	风速	提取	排放	备注
1	GF5_AHSI_W107.84_N40.19_20190803_006569_L10000052859	Craig_20190802	Craig	40.4627	-107.591	GF5	20190803	2019-08-03 04:08:09	2019-08-02 20:08:09	CO	MST	2019-08-02 13:08:09	6021	08/02/2019	13:08	1356.3	1381	1233.4	1213.03	0.0165143	184.164	3.26	-1	1
2	GF5_AHSI_W111.09_N39.21_20191118_008126_L10000065664	Hunter_20191118	Hunter	39.1747	-111.029	GF5	20191118	2019-11-18 04:20:29	2019-11-17 20:20:29	UT	MST	2019-11-17 13:20:29	6165	11/17/2019	13:20	889	885.7	805.489	320.907	0.6016	175.229	0.91	1	0
3	GF5_AHSI_W85.14_N38.72_20191225_008664_L10000068784	Trimble County_20191225	Trimble County	38.5847	-85.4117	GF5	20191225	2019-12-25 02:36:43	2019-12-24 18:36:43	KY	EST	2019-12-24 13:36:43	6071	12/24/2019	13:36	1037.4	1080.8	964.737	1220.82	0.265442	588.499	1.06	-1	1
4	GF5A_AHSI_W108.6_N36.7_20231227_005597_L10000078715	Four Corners Steam Elec Station_20231227	Four Corners Steam Elec Station	36.69	-108.481	GF5A	20231227	2023-12-27 20:12:59	2023-12-27 20:12:59	NM	MST	2023-12-27 13:12:59	2442	12/27/2023	13:12	797	796.8	722.99	923.548	0.277401	112.666	4.38	-1	1
5	GF5A_AHSI_W108.7_N41.7_20231213_005393_L10000074107	Jim Bridger_20231213	Jim Bridger	41.7378	-108.787	GF5A	20231213	2023-12-13 20:08:54	2023-12-13 20:08:54	WY	MST	2023-12-13 13:08:54	8066	12/13/2023	13:08	1825.9	1677	1638.42	1904.64	0.16249	243.568	4	-1	1
6	GF5A_AHSI_W108.8_N41.7_20230923_004213_L10000054221	Jim Bridger_20230923	Jim Bridger	41.7378	-108.787	GF5A	20230923	2023-09-23 20:11:46	2023-09-23 20:11:46	WY	MST	2023-09-23 13:11:46	8066	09/23/2023	13:11	460.9	452.2	416.674	202.515	0.513972	20.189	7.1	-1	2
7	GF5A_AHSI_W94.3_N32.3_20230908_003994_L10000051261	Martin Lake_20230908	Martin Lake	32.2597	-94.5703	GF5A	20230908	2023-09-08 19:22:37	2023-09-08 19:22:37	TX	CST	2023-09-08 13:22:37	6146	09/08/2023	13:22	2712.1	2709.3	2459.44	2454.57	0.00198334	344.338	3.48	-1	1	有羽流、但周围水汽干扰也很大
8	GF5A_AHSI_W98.5_N29.3_20230814_003630_L10000044804	J K Spruce_20230814	J K Spruce	29.3091	-98.3205	GF5A	20230814	2023-08-14 19:42:15	2023-08-14 19:42:15	TX	CST	2023-08-14 13:42:15	7097	08/14/2023	13:42	1389.2	1408.7	1272.64	1260.08	0.00986904	415.431	1.7	1	1	完美
9	GF5B_AHSI_W100.9_N41.2_20220628_004292_L10000156032	Gerald Gentleman Station_20220628	Gerald Gentleman Station	41.0808	-101.141	GF5B	20220628	2022-06-29 01:41:40	2022-06-28 17:41:40	NE	CST	2022-06-28 11:41:40	6077	06/28/2022	11:41	1314.5	1320.1	1195.97	392.081	0.672163	103.932	2	1	2	24波段可见排放，有排放，但是算不准，靠近湖边
10	GF5B_AHSI_W101.1_N41.2_20211220_001524_L10000044164	Gerald Gentleman Station_20211220	Gerald Gentleman Station	41.0808	-101.141	GF5B	20211220	2021-12-21 01:37:21	2021-12-20 17:37:21	NE	CST	2021-12-20 11:37:21	6077	12/20/2021	11:37	1201.3	1283	1135.51	855.908	0.246232	109.457	4.12	-1	2
11	GF5B_AHSI_W101.6_N47.5_20220619_004161_L10000151101	Antelope Valley_20220619	Antelope Valley	47.371	-101.836	GF5B	20220619	2022-06-20 01:51:31	2022-06-19 17:51:31	ND	CST	2022-06-19 11:51:31	6469	06/19/2022	11:51	522.7	565.6	507.266	774.844	0.52749	92.5226	4.53	1	1
12	GF5B_AHSI_W101.9_N35.3_20220424_003345_L10000118254	Harrington Station_20220424	Harrington Station	35.2972	-101.748	GF5B	20220424	2022-04-25 01:38:35	2022-04-24 17:38:35	TX	CST	2022-04-24 11:38:35	6193	04/24/2022	11:38	296.2	292.8	266.755	143.013	0.463877	16.1301	6.66	-1	0
13	GF5B_AHSI_W102.0_N47.5_20220316_002777_L10000118963	Antelope Valley_20220316	Antelope Valley	47.371	-101.836	GF5B	20220316	2022-03-17 01:50:55	2022-03-16 17:50:55	ND	CST	2022-03-16 11:50:55	6469	03/16/2022	11:50	560.6	524.1	480.974	548.798	0.141012	53.5777	9.18	-1	0
14	GF5B_AHSI_W102.1_N47.5_20220626_004263_L10000154923	Antelope Valley_20220626	Antelope Valley	47.371	-101.836	GF5B	20220626	2022-06-27 01:53:27	2022-06-26 17:53:27	ND	CST	2022-06-26 11:53:27	6469	06/26/2022	11:53	667	827.8	733.949	605.428	0.175109	64.8422	6.59	1	1	能看见一点
15	GF5B_AHSI_W107.5_N40.2_20230926_010921_L10000396892	Craig_20230926	Craig	40.4627	-107.591	GF5B	20230926	2023-09-27 02:12:39	2023-09-26 18:12:39	CO	MST	2023-09-26 11:12:39	6021	09/26/2023	11:12	761.2	909.1	717.384	680.668	0.0511795	319.497	1.1	-1	0.5
16	GF5B_AHSI_W107.8_N40.7_20221018_005924_L10000222668	Craig_20221018	Craig	40.4627	-107.591	GF5B	20221018	2022-10-19 02:11:02	2022-10-18 18:11:02	CO	MST	2022-10-18 11:11:02	6021	10/18/2022	11:11	830.6	831.6	753.674	801.851	0.0639229	282.907	1.63	-1	1	两个源
17	GF5B_AHSI_W108.2_N36.7_20220610_004030_L10000145798	Four Corners Steam Elec Station_20220610	Four Corners Steam Elec Station	36.69	-108.481	GF5B	20220610	2022-06-11 02:06:07	2022-06-10 18:06:07	NM	MST	2022-06-10 11:06:07	2442	06/10/2022	11:06	1471.5	1052.86	1296.94	1078.79	0.168203	176.871	2.97	1	1	完美
18	GF5B_AHSI_W108.3_N36.7_20220420_003287_L10000117219	Four Corners Steam Elec Station_20220420	Four Corners Steam Elec Station	36.69	-108.481	GF5B	20220420	2022-04-21 02:05:10	2022-04-20 18:05:10	NM	MST	2022-04-20 11:05:10	2442	04/20/2022	11:05	539.3	621.1	495.429	312.334	0.369567	69.3724	2.3	-1	2	有排放
19	GF5B_AHSI_W108.3_N36.7_20240106_012407_L10000448627	Four Corners Steam Elec Station_20240106	Four Corners Steam Elec Station	36.69	-108.481	GF5B	20240106	2024-01-07 02:12:33	2024-01-06 18:12:33	NM	MST	2024-01-06 11:12:33	2442	01/06/2024	11:12	1357.4	1191	1201.22	732.082	0.390552	308.753	1.32	1	1
20	GF5B_AHSI_W108.8_N41.7_20220212_002311_L10000077220	Jim Bridger_20220212	Jim Bridger	41.7378	-108.787	GF5B	20220212	2022-02-13 02:10:06	2022-02-12 18:10:06	WY	MST	2022-02-12 11:10:06	8066	02/12/2022	11:10	580.1	545	520.951	472.34	0.0933113	56.6115	4.49	-1	1	有排放，但周围噪声明显更大，不适合反演
21	GF5B_AHSI_W109.0_N41.6_20231031_011431_L10000413197	Jim Bridger_20231031	Jim Bridger	41.7378	-108.787	GF5B	20231031	2023-11-01 02:20:04	2023-10-31 18:20:04	WY	MST	2023-10-31 11:20:04	8066	10/31/2023	11:20	1208.8	1174.8	1086.32	1033.73	0.0484146	96.7592	6.01	-1	1
22	GF5B_AHSI_W109.1_N41.6_20231221_012174_L10000440228	Jim Bridger_20231221	Jim Bridger	41.7378	-108.787	GF5B	20231221	2023-12-22 02:20:37	2023-12-21 18:20:37	WY	MST	2023-12-21 11:20:37	8066	12/21/2023	11:20	994.7	868	864.063	776.223	0.101659	128.524	3.18	1	0.5
23	GF5B_AHSI_W110.9_N39.2_20220418_003258_L10000114473	Hunter_20220418	Hunter	39.1747	-111.029	GF5B	20220418	2022-04-19 02:17:59	2022-04-18 18:17:59	UT	MST	2022-04-18 11:17:59	6165	04/18/2022	11:17	909.6	899.7	822.631	137.38	0.832999	101.72	0.6	1	3	低风速
24	GF5B_AHSI_W110.9_N39.2_20240104_012378_L10000447404	Hunter_20240104	Hunter	39.1747	-111.029	GF5B	20240104	2024-01-05 02:25:25	2024-01-04 18:25:25	UT	MST	2024-01-04 11:25:25	6165	01/04/2024	11:25	353.2	352.6	320.191	173.501	0.458132	129.348	0.6	-1	3
25	GF5B_AHSI_W80.4_N39.2_20231012_011153_L10000404427	Harrison Power Station_20231012	Harrison Power Station	39.3844	-80.3325	GF5B	20231012	2023-10-13 00:23:33	2023-10-12 16:23:33	WV	EST	2023-10-12 11:23:33	3944	10/12/2023	11:23	229.9	228.3	208.005	290.279	0.395537	187.061	0.73	-1	3	伪排放
26	GF5B_AHSI_W85.2_N38.7_20231031_011430_L10000413176	Trimble County_20231031	Trimble County	38.5847	-85.4117	GF5B	20231031	2023-11-01 00:42:01	2023-10-31 16:42:01	KY	EST	2023-10-31 11:42:01	6071	10/31/2023	11:42	278.2	284.99	256.691	1307.57	4.09394	208.083	3.2	-1	2	探测到了，但算的不准（该案例说明GF5的探测下限达到256t/h, 3m/s）
27	GF5B_AHSI_W85.3_N38.7_20230714_009842_L10000360353	Trimble County_20230714	Trimble County	38.5847	-85.4117	GF5B	20230714	2023-07-15 00:42:09	2023-07-14 16:42:09	KY	EST	2023-07-14 11:42:09	6071	07/14/2023	11:42	1373.5	1399.05	1262.24	1503.31	0.190983	593.787	1.52	1	1
28	GF5B_AHSI_W88.6_N37.1_20231212_012042_L10000435322	Shawnee_20231212	Shawnee	37.1517	-88.775	GF5B	20231212	2023-12-13 00:54:21	2023-12-12 16:54:21	KY	CST	2023-12-12 10:54:21	1379	12/12/2023	10:54	943.299	928	843.255	636.308	0.245415	204.234	1.77	-1	0.5	羽流飘到了水面上，水汽干扰大
29	GF5B_AHSI_W88.6_N37.2_20220326_002922_L10000100107	Shawnee_20220326	Shawnee	37.1517	-88.775	GF5B	20220326	2022-03-27 00:46:28	2022-03-26 16:46:28	KY	CST	2022-03-26 10:46:28	1379	03/26/2022	10:46	811.401	780.998	714.945	2035.13	1.84656	195.68	5.61	-1	0.5	羽流飘到了水面上，水汽干扰大
30	GF5B_AHSI_W88.7_N37.2_20230825_010454_L10000380643	Shawnee_20230825	Shawnee	37.1517	-88.775	GF5B	20230825	2023-08-26 00:54:41	2023-08-25 16:54:41	KY	CST	2023-08-25 10:54:41	1379	08/25/2023	10:54	1266.6	1261.2	1144.63	1124.97	0.0171827	218.759	2.61	1	1	有排放，圆形，无羽流形状
31	GF5B_AHSI_W92.2_N34.3_20231006_011066_L10000401605	White Bluff_20231006	White Bluff	34.4236	-92.1392	GF5B	20231006	2023-10-07 01:05:59	2023-10-06 17:05:59	AR	CST	2023-10-06 11:05:59	6009	10/06/2023	11:05	320	380.1	294.843	947.363	2.21312	179.462	2.8	-1	0.5
32	GF5B_AHSI_W94.2_N45.6_20220602_003913_L10000141558	Sherburne County_20220602	Sherburne County	45.3792	-93.8958	GF5B	20220602	2022-06-03 01:19:01	2022-06-02 17:19:01	MN	CST	2022-06-02 11:19:01	6090	06/02/2022	11:19	411.9	411.2	373.468	994.39	1.66258	107.602	4.82	-1	0.5
33	GF5B_AHSI_W94.3_N32.3_20231103_011474_L10000414550	Martin Lake_20231103	Martin Lake	32.2597	-94.5703	GF5B	20231103	2023-11-04 01:12:54	2023-11-03 17:12:54	TX	CST	2023-11-03 11:12:54	6146	11/03/2023	11:12	1488.1	1487.9	1349.95	1250.81	0.0734347	276.173	2.34	1	1	有羽流，水面噪声大
34	GF5B_AHSI_W94.4_N32.3_20230906_010629_L10000386730	Martin Lake_20230906	Martin Lake	32.2597	-94.5703	GF5B	20230906	2023-09-07 01:13:22	2023-09-06 17:13:22	TX	CST	2023-09-06 11:13:22	6146	09/06/2023	11:13	2665.3	2675.5	2419.92	1027.35	0.575461	190.111	2.72	-1	-10	有一点点云；只有一点点排放，不构成羽流，算不准，靠近湖边
35	GF5B_AHSI_W94.5_N32.3_20220407_003097_L10000107611	Martin Lake_20220407	Martin Lake	32.2597	-94.5703	GF5B	20220407	2022-04-08 01:05:50	2022-04-07 17:05:50	TX	CST	2022-04-07 11:05:50	6146	04/07/2022	11:05	1469.4	1514	1336.39	884.859	0.337873	87.0666	6.16	-1	0.5
36	GF5B_AHSI_W94.5_N38.2_20221019_005938_L10000223276	La Cygne_20221019	La Cygne	38.3472	-94.6467	GF5B	20221019	2022-10-20 01:15:33	2022-10-19 17:15:33	KS	CST	2022-10-19 11:15:33	1241	10/19/2022	11:15	708.8	713.2	644.01	693.404	0.0766968	135.344	2.6	-1	1	32波段可见排放源
37	GF5B_AHSI_W96.5_N31.3_20221019_005938_L10000223290	Oak Grove_20221019	Oak Grove	31.185	-96.4853	GF5B	20221019	2022-10-20 01:17:28	2022-10-19 17:17:28	TX	CST	2022-10-19 11:17:28	6180	10/19/2022	11:17	1788.5	1803.2	1626.28	1808.22	0.111874	687.255	1.55	-1	1	有排放
38	GF5B_AHSI_W96.9_N29.8_20221019_005938_L10000223293	Sam Seymour_20221019	Sam Seymour	29.9172	-96.7506	GF5B	20221019	2022-10-20 01:17:53	2022-10-19 17:17:53	TX	CST	2022-10-19 11:17:53	6179	10/19/2022	11:17	964.3	979	878.577	1017.6	0.158239	192.883	2.61	-1	1
39	ZY1E_AHSI_W101.24_N41.04_20230805_020428_L1A0000637084	Gerald Gentleman Station_20230805	Gerald Gentleman Station	41.0808	-101.141	ZY1E	20230805	2023-08-05 17:48:20	2023-08-05 17:48:20	NE	CST	2023-08-05 11:48:20	6077	08/05/2023	11:48	1358.5	1357.1	1231.39	816.682	0.336783	82.7517	6.02	-1	0.5
40	ZY1E_AHSI_W101.46_N35.28_20220305_012995_L1A0000414997	Harrington Station_20220305	Harrington Station	35.2972	-101.748	ZY1E	20220305	2022-03-05 17:52:24	2022-03-05 17:52:24	TX	CST	2022-03-05 11:52:24	6193	03/05/2022	11:52	167.2	177.3	159.622	123.741	0.224786	12.6437	10.76	1	0	排放强度太低了，无法检测到
41	ZY1E_AHSI_W101.95_N35.28_20220331_013368_L1A0000427095	Harrington Station_20220331	Harrington Station	35.2972	-101.748	ZY1E	20220331	2022-03-31 17:54:08	2022-03-31 17:54:08	TX	CST	2022-03-31 11:54:08	6193	03/31/2022	11:54	641.9	638.7	579.709	610.772	0.0535839	61.261	5.28	1	1
42	ZY1E_AHSI_W101.95_N47.64_20201123_006296_L1A0000193277	Antelope Valley_20201123	Antelope Valley	47.371	-101.836	ZY1E	20201123	2020-11-23 18:05:58	2020-11-23 18:05:58	ND	CST	2020-11-23 12:05:58	6469	11/23/2020	12:05	372.7	365.9	337.594	322.52	0.0446503	42.1978	6.44	-1	0	这一景还是不太好反演
43	ZY1E_AHSI_W104.76_N41.92_20230917_021045_L1A0000655064	Laramie River_20230917	Laramie River	42.1103	-104.883	ZY1E	20230917	2023-09-17 18:02:08	2023-09-17 18:02:08	WY	MST	2023-09-17 11:02:08	6204	09/17/2023	11:02	1667.1	1881.6	1518.85	1415.03	0.0683539	114.764	7.79	-1	1	羽流良好
44	ZY1E_AHSI_W104.93_N41.92_20230625_019840_L1A0000620580	Laramie River_20230625	Laramie River	42.1103	-104.883	ZY1E	20230625	2023-06-25 18:05:08	2023-06-25 18:05:08	WY	MST	2023-06-25 11:05:08	6204	06/25/2023	11:05	1043.4	1114.7	951.947	1081.42	0.136009	215.711	2.52	1	1	有排放
45	ZY1E_AHSI_W105.13_N42.36_20200825_005004_L1A0000136593	Laramie River_20200825	Laramie River	42.1103	-104.883	ZY1E	20200825	2020-08-25 18:10:51	2020-08-25 18:10:51	WY	MST	2020-08-25 11:10:51	6204	08/25/2020	11:10	520.3	520.5	472.038	547.477	0.159815	86.6912	3.13	-1	1
46	ZY1E_AHSI_W107.47_N40.60_20231007_021332_L1A0000663395	Craig_20231007	Craig	40.4627	-107.591	ZY1E	20231007	2023-10-07 18:11:00	2023-10-07 18:11:00	CO	MST	2023-10-07 11:11:00	6021	10/07/2023	11:11	487.2	518.1	447.12	498.346	0.114569	204.611	1.36	-1	3	有排放 不像羽流
47	ZY1E_AHSI_W107.63_N40.60_20230715_020127_L1A0000628485	Craig_20230715	Craig	40.4627	-107.591	ZY1E	20230715	2023-07-15 18:14:00	2023-07-15 18:14:00	CO	MST	2023-07-15 11:14:00	6021	07/15/2023	11:14	892.4	903.4	811.9	795.571	0.0201121	140.603	2.81	-1	1	19波段较好
48	ZY1E_AHSI_W108.64_N36.61_20200917_005334_L1A0000154763	Four Corners Steam Elec Station_20200917	Four Corners Steam Elec Station	36.69	-108.481	ZY1E	20200917	2020-09-17 18:19:28	2020-09-17 18:19:28	NM	MST	2020-09-17 11:19:28	2442	09/17/2020	11:19	1507.6	1506	1367.21	900.085	0.341664	163.051	2.71	-1	1	羽流形状好
49	ZY1E_AHSI_W108.68_N41.92_20200911_005248_L1A0000148906	Jim Bridger_20200911	Jim Bridger	41.7378	-108.787	ZY1E	20200911	2020-09-11 18:24:53	2020-09-11 18:24:53	WY	MST	2020-09-11 11:24:53	8066	09/11/2020	11:24	1437.4	1314.4	1259.35	1261.15	0.00142233	104.584	7.11	-1	1	排放位置在山上，不像排放源
50	ZY1E_AHSI_W108.72_N36.61_20231007_021332_L1A0000663404	Four Corners Steam Elec Station_20231007	Four Corners Steam Elec Station	36.69	-108.481	ZY1E	20231007	2023-10-07 18:12:07	2023-10-07 18:12:07	NM	MST	2023-10-07 11:12:07	2442	10/07/2023	11:12	1532.3	1509.9	1386.01	940.146	0.321692	309.59	1.7	1	1	羽流很完整，可以作为案例
51	ZY1E_AHSI_W108.78_N41.92_20200813_004832_L1A0000126505	Jim Bridger_20200813	Jim Bridger	41.7378	-108.787	ZY1E	20200813	2020-08-13 18:24:46	2020-08-13 18:24:46	WY	MST	2020-08-13 11:24:46	8066	08/13/2020	11:24	1902.1	1640.8	1630.74	987.957	0.394166	96.1528	5.41	1	0.5	羽流形状很好，不过怎么风速有点问题
52	ZY1E_AHSI_W111.21_N39.27_20201004_005578_L1A0000168618	Hunter_20201004	Hunter	39.1747	-111.029	ZY1E	20201004	2020-10-04 18:32:36	2020-10-04 18:32:36	UT	MST	2020-10-04 11:32:36	6165	10/04/2020	11:32	656	681.6	607.499	502.745	0.172435	123.959	2.13	-1	1	完美
53	ZY1E_AHSI_W111.31_N39.27_20200905_005163_L1A0000144224	Hunter_20200905	Hunter	39.1747	-111.029	ZY1E	20200905	2020-09-05 18:32:32	2020-09-05 18:32:32	UT	MST	2020-09-05 11:32:32	6165	09/05/2020	11:32	1057.9	1295.6	1074.72	489.72	0.544327	138.384	1.91	1	0.5	有羽流
54	ZY1E_AHSI_W80.32_N39.27_20220828_015517_L1A0000495655	Harrison Power Station_20220828	Harrison Power Station	39.3844	-80.3325	ZY1E	20220828	2022-08-28 16:29:54	2022-08-28 16:29:54	WV	EST	2022-08-28 11:29:54	3944	08/28/2022	11:29	2026.3	2030.1	1839.89	509.52	0.723071	133.621	2.02	1	-10	第2种波段选取未反演到排放；数据问题
55	ZY1E_AHSI_W85.49_N38.38_20220327_013308_L1A0000425150	Trimble County_20220327	Trimble County	38.5847	-85.4117	ZY1E	20220327	2022-03-27 16:51:14	2022-03-27 16:51:14	KY	EST	2022-03-27 11:51:14	6071	03/27/2022	11:51	412.9	409.2	371.723	445.15	0.197529	67.2422	3.62	-1	0
56	ZY1E_AHSI_W86.17_N36.17_20220327_013308_L1A0000425155	Gallatin_20220327	Gallatin	36.3156	-86.4006	ZY1E	20220327	2022-03-27 16:51:51	2022-03-27 16:51:51	TN	CST	2022-03-27 10:51:51	3403	03/27/2022	10:51	307	306.4	278.043	277.744	0.0010745	63.339	2.48	-1	0
57	ZY1E_AHSI_W86.59_N36.17_20221004_016048_L1A0000511602	Gallatin_20221004	Gallatin	36.3156	-86.4006	ZY1E	20221004	2022-10-04 16:51:33	2022-10-04 16:51:33	TN	CST	2022-10-04 10:51:33	3403	10/04/2022	10:51	758.6	764.3	692.586	978.408	0.412688	383.16	1.48	-1	0.5	像伪排放源
58	ZY1E_AHSI_W88.57_N37.06_20211102_011228_L1A0000359594	Shawnee_20211102	Shawnee	37.1517	-88.775	ZY1E	20211102	2021-11-02 17:02:50	2021-11-02 17:02:50	KY	CST	2021-11-02 11:02:50	1379	11/02/2021	11:02	430.399	432.9	390.527	918.366	1.35161	161.663	3.01	1	-10	伪排放
59	ZY1E_AHSI_W88.87_N37.06_20211128_011601_L1A0000371189	Shawnee_20211128	Shawnee	37.1517	-88.775	ZY1E	20211128	2021-11-28 17:03:59	2021-11-28 17:03:59	KY	CST	2021-11-28 11:03:59	1379	11/28/2021	11:03	406.4	406.4	368.68	450.286	0.221346	74.0856	3.51	1	0.5	有排放
60	ZY1E_AHSI_W88.95_N37.06_20210119_007111_L1A0000229838	Shawnee_20210119	Shawnee	37.1517	-88.775	ZY1E	20210119	2021-01-19 17:02:53	2021-01-19 17:02:53	KY	CST	2021-01-19 11:02:53	1379	01/19/2021	11:02	868.501	669.401	781.87	784.206	0.00298707	297.854	1.57	1	1	右下角伪排放源
61	ZY1E_AHSI_W89.08_N37.06_20201221_006696_L1A0000212411	Shawnee_20201221	Shawnee	37.1517	-88.775	ZY1E	20201221	2020-12-21 17:03:04	2020-12-21 17:03:04	KY	CST	2020-12-21 11:03:04	1379	12/21/2020	11:03	386.9	386.599	350.976	454.212	0.294138	60.4141	6.44	-1	0.5
62	ZY1E_AHSI_W90.79_N38.83_20210925_010683_L1A0000340283	Labadie_20210925	Labadie	38.5583	-90.8361	ZY1E	20210925	2021-09-25 17:13:23	2021-09-25 17:13:23	MO	CST	2021-09-25 11:13:23	2103	09/25/2021	11:13	1746.6	1732.6	1581.74	688.016	0.565025	124.946	2.94	1	1
63	ZY1E_AHSI_W90.90_N38.38_20220113_012261_L1A0000391512	Labadie_20220113	Labadie	38.5583	-90.8361	ZY1E	20220113	2022-01-13 17:13:19	2022-01-13 17:13:19	MO	CST	2022-01-13 11:13:19	2103	01/13/2022	11:13	1841.4	1849.6	1672.1	661.306	0.604506	222.228	1.73	-1	1
64	ZY1E_AHSI_W90.98_N38.38_20230329_018573_L1A0000585856	Labadie_20230329	Labadie	38.5583	-90.8361	ZY1E	20230329	2023-03-29 17:07:56	2023-03-29 17:07:56	MO	CST	2023-03-29 11:07:56	2103	03/29/2023	11:07	2464.5	2453.2	2234.56	2022.13	0.095067	745.264	1.58	-1	0.5	羽流沿着江面规整陈列
65	ZY1E_AHSI_W91.94_N34.40_20220726_015044_L1A0000481359	White Bluff_20220726	White Bluff	34.4236	-92.1392	ZY1E	20220726	2022-07-26 17:12:13	2022-07-26 17:12:13	AR	CST	2022-07-26 11:12:13	6009	07/26/2022	11:12	1389.4	1742.2	1324.45	1214.94	0.0826837	193.477	3.26	-1	1	微弱的排放
66	ZY1E_AHSI_W92.11_N34.40_20220113_012261_L1A0000391521	White Bluff_20220113	White Bluff	34.4236	-92.1392	ZY1E	20220113	2022-01-13 17:14:27	2022-01-13 17:14:27	AR	CST	2022-01-13 11:14:27	6009	01/13/2022	11:14	901.3	897.1	816.757	667.412	0.182851	162.522	2.28	-1	0	没有排放
67	ZY1E_AHSI_W92.15_N34.40_20220309_013050_L1A0000416988	White Bluff_20220309	White Bluff	34.4236	-92.1392	ZY1E	20220309	2022-03-09 17:14:19	2022-03-09 17:14:19	AR	CST	2022-03-09 11:14:19	6009	03/09/2022	11:14	280.3	279.1	254.03	1031.35	3.05994	185.683	2.83	1	0.5	很多云，不适合反演
68	ZY1E_AHSI_W92.33_N34.40_20231104_021729_L1A0000674441	White Bluff_20231104	White Bluff	34.4236	-92.1392	ZY1E	20231104	2023-11-04 17:03:42	2023-11-04 17:03:42	AR	CST	2023-11-04 11:03:42	6009	11/04/2023	11:03	537.3	433.2	482.708	464.969	0.0367491	263.372	0.86	-1	1
69	ZY1E_AHSI_W93.56_N45.45_20220320_013210_L1A0000421897	Sherburne County_20220320	Sherburne County	45.3792	-93.8958	ZY1E	20220320	2022-03-20 17:31:14	2022-03-20 17:31:14	MN	CST	2022-03-20 11:31:14	6090	03/20/2022	11:31	1451.2	1311.2	1250.89	755.283	0.396202	218.997	1.91	-1	0.5
70	ZY1E_AHSI_W94.02_N45.45_20220927_015948_L1A0000508557	Sherburne County_20220927	Sherburne County	45.3792	-93.8958	ZY1E	20220927	2022-09-27 17:31:08	2022-09-27 17:31:08	MN	CST	2022-09-27 11:31:08	6090	09/27/2022	11:31	1052.9	1052.9	955.175	1657.36	0.735137	257.031	3.34	-1	0.5	有羽流
71	ZY1E_AHSI_W94.33_N38.38_20211206_011716_L1A0000374910	La Cygne_20211206	La Cygne	38.3472	-94.6467	ZY1E	20211206	2021-12-06 17:27:03	2021-12-06 17:27:03	KS	CST	2021-12-06 11:27:03	1241	12/06/2021	11:27	365.5	442.9	363.173	651.11	0.792835	82.9324	4.78	1	0.5
72	ZY1E_AHSI_W94.40_N32.17_20210401_008144_L1A0000261751	Martin Lake_20210401	Martin Lake	32.2597	-94.5703	ZY1E	20210401	2021-04-01 17:20:59	2021-04-01 17:20:59	TX	CST	2021-04-01 11:20:59	6146	04/01/2021	11:20	1201.3	1170.4	1080.46	1015.03	0.0605533	169.449	3.06	1	1	有羽流
73	ZY1E_AHSI_W94.44_N38.38_20210913_010511_L1A0000334632	La Cygne_20210913	La Cygne	38.3472	-94.6467	ZY1E	20210913	2021-09-13 17:27:32	2021-09-13 17:27:32	KS	CST	2021-09-13 11:27:32	1241	09/13/2021	11:27	662.6	671	604.53	752.327	0.244483	92.3671	5.41	-1	0.5
74	ZY1E_AHSI_W94.49_N38.38_20200711_004357_L1A0000107667	La Cygne_20200711	La Cygne	38.3472	-94.6467	ZY1E	20200711	2020-07-11 17:23:19	2020-07-11 17:23:19	KS	CST	2020-07-11 11:23:19	1241	07/11/2020	11:23	1601.4	1598	1451.58	2480.95	0.709135	452.635	2.72	1	1	反演效果不好，只有一团排放；感觉有点像是把水汽也核算进去了，偏高很多；误差太大了
75	ZY1E_AHSI_W94.59_N32.17_20220303_012967_L1A0000414108	Martin Lake_20220303	Martin Lake	32.2597	-94.5703	ZY1E	20220303	2022-03-03 17:22:15	2022-03-03 17:22:15	TX	CST	2022-03-03 11:22:15	6146	03/03/2022	11:22	1866.9	1838.5	1684.18	608.551	0.638665	460.783	0.58	-1	2	这一景本应该能够看到完美羽流的，但是羽流的方向刚好经过了湖面，导致出现一段非常大的异常高值
76	ZY1E_AHSI_W94.77_N32.17_20210104_006896_L1A0000221658	Martin Lake_20210104	Martin Lake	32.2597	-94.5703	ZY1E	20210104	2021-01-04 17:21:40	2021-01-04 17:21:40	TX	CST	2021-01-04 11:21:40	6146	01/04/2021	11:21	1286	1418.3	1208.65	912.298	0.24519	254.975	1.96	-1	0	水汽干扰大，几乎无反演结果
77	ZY1E_AHSI_W96.19_N31.29_20220130_012507_L1A0000399543	Oak Grove_20220130	Oak Grove	31.185	-96.4853	ZY1E	20220130	2022-01-30 17:28:05	2022-01-30 17:28:05	TX	CST	2022-01-30 11:28:05	6180	01/30/2022	11:28	1396	1398.9	1267.66	1163.5	0.0821662	134.467	4.62	1	1
78	ZY1E_AHSI_W96.23_N31.29_20220326_013296_L1A0000424559	Oak Grove_20220326	Oak Grove	31.185	-96.4853	ZY1E	20220326	2022-03-26 17:27:55	2022-03-26 17:27:55	TX	CST	2022-03-26 11:27:55	6180	03/26/2022	11:27	767.3	835.6	723.965	975.038	0.346802	148.983	3.3	-1	1
79	ZY1E_AHSI_W96.26_N31.29_20201006_005607_L1A0000169633	Oak Grove_20201006	Oak Grove	31.185	-96.4853	ZY1E	20201006	2020-10-06 17:25:38	2020-10-06 17:25:38	TX	CST	2020-10-06 11:25:38	6180	10/06/2020	11:25	1874.4	1879.2	1702.24	1883.54	0.106508	521.576	1.93	-1	1	有排放，无羽流
80	ZY1E_AHSI_W96.28_N31.29_20210424_008474_L1A0000271419	Oak Grove_20210424	Oak Grove	31.185	-96.4853	ZY1E	20210424	2021-04-24 17:27:56	2021-04-24 17:27:56	TX	CST	2021-04-24 11:27:56	6180	04/24/2021	11:27	893.6	900.9	813.64	930.324	0.143409	94.1034	5.95	1	1	偏高
81	ZY1E_AHSI_W96.41_N31.29_20211206_011716_L1A0000374926	Oak Grove_20211206	Oak Grove	31.185	-96.4853	ZY1E	20211206	2021-12-06 17:29:06	2021-12-06 17:29:06	TX	CST	2021-12-06 11:29:06	6180	12/06/2021	11:29	1798.7	1790.1	1627.98	2252.21	0.383437	187.286	7.76	-1	1	有一点点羽流
82	ZY1E_AHSI_W96.55_N29.95_20220130_012507_L1A0000399546	Sam Seymour_20220130	Sam Seymour	29.9172	-96.7506	ZY1E	20220130	2022-01-30 17:28:28	2022-01-30 17:28:28	TX	CST	2022-01-30 11:28:28	6179	01/30/2022	11:28	1394.8	1390.4	1263.48	844.457	0.331641	151.607	2.83	-1	0.5
83	ZY1E_AHSI_W96.58_N31.29_20200711_004359_L1A0000107694	Oak Grove_20200711	Oak Grove	31.185	-96.4853	ZY1E	20200711	2020-07-11 17:25:19	2020-07-11 17:25:19	TX	CST	2020-07-11 11:25:19	6180	07/11/2020	11:25	1869.6	1875.6	1698.34	1954.66	0.150921	295.472	3.26	-1	1	羽流可以
84	ZY1E_AHSI_W96.59_N29.95_20220326_013296_L1A0000424562	Sam Seymour_20220326	Sam Seymour	29.9172	-96.7506	ZY1E	20220326	2022-03-26 17:28:17	2022-03-26 17:28:17	TX	CST	2022-03-26 11:28:17	6179	03/26/2022	11:28	1765.4	1773.9	1605.14	932.652	0.41896	121.923	3.98	1	0.5	能看到排放，但羽流飘到了湖面上
85	ZY1E_AHSI_W96.65_N29.95_20210424_008474_L1A0000271422	Sam Seymour_20210424	Sam Seymour	29.9172	-96.7506	ZY1E	20210424	2021-04-24 17:28:19	2021-04-24 17:28:19	TX	CST	2021-04-24 11:28:19	6179	04/24/2021	11:28	1037.5	1164.7	995.055	1096.1	0.101543	102.807	6.15	-1	1
86	ZY1E_AHSI_W96.74_N31.10_20200612_003941_L1A0000093912	Oak Grove_20200612	Oak Grove	31.185	-96.4853	ZY1E	20200612	2020-06-12 17:25:12	2020-06-12 17:25:12	TX	CST	2020-06-12 11:25:12	6180	06/12/2020	11:25	1759.1	1762.5	1597.11	2294.64	0.436741	287.554	4	1	1	排放羽流很清晰
87	ZY1E_AHSI_W96.95_N29.95_20200711_004359_L1A0000107697	Sam Seymour_20200711	Sam Seymour	29.9172	-96.7506	ZY1E	20200711	2020-07-11 17:25:42	2020-07-11 17:25:42	TX	CST	2020-07-11 11:25:42	6179	07/11/2020	11:25	1793.1	1824.9	1638.69	1304.62	0.203867	227.911	2.82	-1	1	有羽流，还不错，飘到水面上了，前16波段清晰；作为强吸收和弱吸收的案例
88	ZY1E_AHSI_W97.05_N29.95_20200612_003941_L1A0000093915	Sam Seymour_20200612	Sam Seymour	29.9172	-96.7506	ZY1E	20200612	2020-06-12 17:25:31	2020-06-12 17:25:31	TX	CST	2020-06-12 11:25:31	6179	06/12/2020	11:25	1467.5	1562.8	1367.32	1639.83	0.199305	221.633	3.64	1	1	羽流形状很好，可以作为案例
89	ZY1E_AHSI_W98.07_N29.51_20220930_015991_L1A0000509878	J K Spruce_20220930	J K Spruce	29.3091	-98.3205	ZY1E	20220930	2022-09-30 17:31:53	2022-09-30 17:31:53	TX	CST	2022-09-30 11:31:53	7097	09/30/2022	11:31	1501.1	1499.5	1361.03	1377.82	0.0123386	495.526	1.61	-1	1	有噪声，有羽流
90	ZY1E_AHSI_W98.20_N29.06_20220418_013626_L1A0000435959	J K Spruce_20220418	J K Spruce	29.3091	-98.3205	ZY1E	20220418	2022-04-18 17:33:49	2022-04-18 17:33:49	TX	CST	2022-04-18 11:33:49	7097	04/18/2022	11:33	629.1	628.9	570.61	717.777	0.257912	68.5588	6.44	1	1
91	ZY1E_AHSI_W98.50_N29.51_20200930_005521_L1A0000170469	J K Spruce_20200930	J K Spruce	29.3091	-98.3205	ZY1E	20200930	2020-09-30 17:33:03	2020-09-30 17:33:03	TX	CST	2020-09-30 11:33:03	7097	09/30/2020	11:33	914.9	958.2	851.588	1225.33	0.438878	192.292	3.18	1	1
92	ZY1E_AHSI_W98.51_N29.06_20201029_005935_L1A0000194928	J K Spruce_20201029	J K Spruce	29.3091	-98.3205	ZY1E	20201029	2020-10-29 17:33:12	2020-10-29 17:33:12	TX	CST	2020-10-29 11:33:12	7097	10/29/2020	11:33	508.1	564.9	489.281	537.164	0.0978634	52.3128	7.17	-1	1	有团块排放
93	ZY1E_AHSI_W98.53_N29.51_20220514_013997_L1A0000447750	J K Spruce_20220514	J K Spruce	29.3091	-98.3205	ZY1E	20220514	2022-05-14 17:35:16	2022-05-14 17:35:16	TX	CST	2022-05-14 11:35:16	7097	05/14/2022	11:35	1041	1035.2	941.31	1396.6	0.483677	339.874	2.12	-1	1
94	ZY1F_AHSI_W101.04_N41.04_20230916_009032_L1A0000537816	Gerald Gentleman Station_20230916	Gerald Gentleman Station	41.0808	-101.141	ZY1F	20230916	2023-09-16 18:00:26	2023-09-16 18:00:26	NE	CST	2023-09-16 12:00:26	6077	09/16/2023	12:00	1330.8	1109.2	1207.28	815.545	0.324478	106.455	3.96	1	0.5
95	ZY1F_AHSI_W101.05_N41.04_20231110_009821_L1A0000582861	Gerald Gentleman Station_20231110	Gerald Gentleman Station	41.0808	-101.141	ZY1F	20231110	2023-11-10 18:01:07	2023-11-10 18:01:07	NE	CST	2023-11-10 12:01:07	6077	11/10/2023	12:01	1304.1	1307.4	1183.11	802.109	0.322033	86.7146	4.88	1	1
96	ZY1F_AHSI_W101.48_N41.04_20230624_007827_L1A0000469131	Gerald Gentleman Station_20230624	Gerald Gentleman Station	41.0808	-101.141	ZY1F	20230624	2023-06-24 18:00:53	2023-06-24 18:00:53	NE	CST	2023-06-24 12:00:53	6077	06/24/2023	12:00	688	687.2	624.143	579.361	0.0717502	48.1986	7.6	1	1	10波段效果好
97	ZY1F_AHSI_W104.83_N41.92_20230930_009233_L1A0000549577	Laramie River_20230930	Laramie River	42.1103	-104.883	ZY1F	20230930	2023-09-30 18:16:43	2023-09-30 18:16:43	WY	MST	2023-09-30 11:16:43	6204	09/30/2023	11:16	798.9	661.1	691.414	704.928	0.0195463	104.344	3.4	-1	1	有羽流
98	ZY1F_AHSI_W107.55_N40.59_20231020_009525_L1A0000564874	Craig_20231020	Craig	40.4627	-107.591	ZY1F	20231020	2023-10-20 18:26:24	2023-10-20 18:26:24	CO	MST	2023-10-20 11:26:24	6021	10/20/2023	11:26	729.3	742.5	666.799	27.5001	0.958758	27.9707	0.42	1	2	22有一个羽流 24双羽流0.001
99	ZY1F_AHSI_W110.71_N39.27_20230817_008602_L1A0000512937	Hunter_20230817	Hunter	39.1747	-111.029	ZY1F	20230817	2023-08-17 18:36:51	2023-08-17 18:36:51	UT	MST	2023-08-17 11:36:51	6165	08/17/2023	11:36	654	651.7	592.047	572.881	0.0323714	144.665	2.06	1	1
100	ZY1F_AHSI_W110.73_N39.27_20230623_007813_L1A0000468861	Hunter_20230623	Hunter	39.1747	-111.029	ZY1F	20230623	2023-06-23 18:36:03	2023-06-23 18:36:03	UT	MST	2023-06-23 11:36:03	6165	06/23/2023	11:36	422.6	419.8	381.852	488.826	0.280146	46.5609	6.19	-1	0.5	有点不像
101	ZY1F_AHSI_W111.15_N39.27_20230719_008186_L1A0000490264	Hunter_20230719	Hunter	39.1747	-111.029	ZY1F	20230719	2023-07-19 18:38:10	2023-07-19 18:38:10	UT	MST	2023-07-19 11:38:10	6165	07/19/2023	11:38	656.412	749.552	649.001	154.15	0.762481	131.802	0.5	1	2	清晰完美
102	ZY1F_AHSI_W80.08_N39.27_20220621_002553_L1A0000190867	Harrison Power Station_20220621	Harrison Power Station	39.3844	-80.3325	ZY1F	20220621	2022-06-21 16:24:44	2022-06-21 16:24:44	WV	EST	2022-06-21 11:24:44	3944	06/21/2022	11:24	1900.6	2008.4	1763.31	1635.54	0.0724611	353.636	2.33	1	1	非常清晰
103	ZY1F_AHSI_W80.61_N39.27_20230418_006865_L1A0000414746	Harrison Power Station_20230418	Harrison Power Station	39.3844	-80.3325	ZY1F	20230418	2023-04-18 16:34:27	2023-04-18 16:34:27	WV	EST	2023-04-18 11:34:27	3944	04/18/2023	11:34	631.6	618	565.987	602.945	0.0652999	59.86	5.73	-1	1
104	ZY1F_AHSI_W86.57_N36.17_20230305_006234_L1A0000379047	Gallatin_20230305	Gallatin	36.3156	-86.4006	ZY1F	20230305	2023-03-05 16:54:32	2023-03-05 16:54:32	TN	CST	2023-03-05 10:54:32	3403	03/05/2023	10:54	278.3	276	250.592	220.65	0.119486	49.8318	2.5	-1	0	无排放
105	ZY1F_AHSI_W88.63_N37.05_20231031_009677_L1A0000574307	Shawnee_20231031	Shawnee	37.1517	-88.775	ZY1F	20231031	2023-10-31 17:07:20	2023-10-31 17:07:20	KY	CST	2023-10-31 11:07:20	1379	10/31/2023	11:07	879.1	888.799	798.533	584.255	0.26834	90.5014	3.6	-1	0	羽流飘到了水面上，水汽干扰大
106	ZY1F_AHSI_W90.79_N38.83_20230704_007970_L1A0000476992	Labadie_20230704	Labadie	38.5583	-90.8361	ZY1F	20230704	2023-07-04 17:16:01	2023-07-04 17:16:01	MO	CST	2023-07-04 11:16:01	2103	07/04/2023	11:16	2560.7	2558.1	2322.4	2252.28	0.0301946	464.656	2.41	-1	1	构成羽流，有排放
107	ZY1F_AHSI_W90.93_N38.38_20231022_009549_L1A0000565683	Labadie_20231022	Labadie	38.5583	-90.8361	ZY1F	20231022	2023-10-22 17:17:43	2023-10-22 17:17:43	MO	CST	2023-10-22 11:17:43	2103	10/22/2023	11:17	2197.7	2194	1992.77	506.287	0.745938	148.862	1.92	1	0.5	受江水影响较大
108	ZY1F_AHSI_W93.93_N45.45_20220721_002978_L1A0000173921	Sherburne County_20220721	Sherburne County	45.3792	-93.8958	ZY1F	20220721	2022-07-21 17:27:56	2022-07-21 17:27:56	MN	CST	2022-07-21 11:27:56	6090	07/21/2022	11:27	2400.9	2419.9	2185.82	2588.64	0.184291	239.32	5.9	1	1	适合作为反演案例
109	ZY1F_AHSI_W94.55_N32.17_20231210_010251_L1A0000608285	Martin Lake_20231210	Martin Lake	32.2597	-94.5703	ZY1F	20231210	2023-12-10 17:27:08	2023-12-10 17:27:08	TX	CST	2023-12-10 11:27:08	6146	12/10/2023	11:27	1027.6	1026.4	931.733	1050.18	0.127129	122.473	4.79	-1	1	有羽流
110	ZY1F_AHSI_W94.55_N38.38_20220920_003853_L1A0000229994	La Cygne_20220920	La Cygne	38.3472	-94.6467	ZY1F	20220920	2022-09-20 17:24:31	2022-09-20 17:24:31	KS	CST	2022-09-20 11:24:31	1241	09/20/2022	11:24	759.1	765.6	691.003	880.415	0.274113	96.5914	5.01	1	0.5	水汽影响太大了
111	ZY1F_AHSI_W94.56_N38.38_20230816_008587_L1A0000512042	La Cygne_20230816	La Cygne	38.3472	-94.6467	ZY1F	20230816	2023-08-16 17:31:23	2023-08-16 17:31:23	KS	CST	2023-08-16 11:31:23	1241	08/16/2023	11:31	1273.7	1441.1	1233.94	696.216	0.43578	126.552	2.8	1	0.5	飘到湖面上了
112	ZY1F_AHSI_W94.57_N32.17_20220802_003150_L1A0000184740	Martin Lake_20220802	Martin Lake	32.2597	-94.5703	ZY1F	20220802	2022-08-02 17:17:29	2022-08-02 17:17:29	TX	CST	2022-08-02 11:17:29	6146	08/02/2022	11:17	2263.6	2623.6	2146.04	2202.6	0.0263559	319.706	3.39	-1	0.5	有排放，圆形，堆叠状，飘到湖面上
113	ZY1F_AHSI_W94.58_N38.38_20230108_005431_L1A0000329362	La Cygne_20230108	La Cygne	38.3472	-94.6467	ZY1F	20230108	2023-01-08 17:27:27	2023-01-08 17:27:27	KS	CST	2023-01-08 11:27:27	1241	01/08/2023	11:27	1406.5	1398.2	1272.57	330.144	0.740568	149.709	1.2	1	0.5	噪声较大
114	ZY1F_AHSI_W94.61_N32.17_20221120_004728_L1A0000290523	Martin Lake_20221120	Martin Lake	32.2597	-94.5703	ZY1F	20221120	2022-11-20 17:20:45	2022-11-20 17:20:45	TX	CST	2022-11-20 11:20:45	6146	11/20/2022	11:20	2635.2	2664.4	2399.44	2356.54	0.0178808	394.781	2.97	-1	1	有一点羽流比较稀疏
115	ZY1F_AHSI_W96.64_N31.29_20220727_003064_L1A0000178119	Oak Grove_20220727	Oak Grove	31.185	-96.4853	ZY1F	20220727	2022-07-27 17:24:51	2022-07-27 17:24:51	TX	CST	2022-07-27 11:24:51	6180	07/27/2022	11:24	1241	1493.7	1217.51	1001.71	0.177246	131.681	3.79	-1	1
116	ZY1F_AHSI_W96.65_N31.29_20230304_006220_L1A0000378222	Oak Grove_20230304	Oak Grove	31.185	-96.4853	ZY1F	20230304	2023-03-04 17:30:35	2023-03-04 17:30:35	TX	CST	2023-03-04 11:30:35	6180	03/04/2023	11:30	650.4	654.3	591.802	782.908	0.322922	104.598	3.8	-1	1	被云挡住了
117	ZY1F_AHSI_W96.65_N31.29_20230816_008587_L1A0000512058	Oak Grove_20230816	Oak Grove	31.185	-96.4853	ZY1F	20230816	2023-08-16 17:33:23	2023-08-16 17:33:23	TX	CST	2023-08-16 11:33:23	6180	08/16/2023	11:33	1820.5	1806.6	1644.59	1819.92	0.106607	343.852	2.6	-1	1	羽流很好，简直完美！！！适合作为案例
118	ZY1F_AHSI_W96.67_N31.29_20230108_005431_L1A0000329378	Oak Grove_20230108	Oak Grove	31.185	-96.4853	ZY1F	20230108	2023-01-08 17:29:27	2023-01-08 17:29:27	TX	CST	2023-01-08 11:29:27	6180	01/08/2023	11:29	1957.3	1974.5	1783.17	1808.36	0.014123	207.56	4.4	1	1	有羽流，水池下方有一个点源
119	ZY1F_AHSI_W97.01_N29.95_20230304_006220_L1A0000378225	Sam Seymour_20230304	Sam Seymour	29.9172	-96.7506	ZY1F	20230304	2023-03-04 17:30:57	2023-03-04 17:30:57	TX	CST	2023-03-04 11:30:57	6179	03/04/2023	11:30	672.8	881.2	704.883	1119.1	0.587645	184.061	3.01	-1	0.5
120	ZY1F_AHSI_W97.01_N29.95_20230816_008587_L1A0000512061	Sam Seymour_20230816	Sam Seymour	29.9172	-96.7506	ZY1F	20230816	2023-08-16 17:33:45	2023-08-16 17:33:45	TX	CST	2023-08-16 11:33:45	6179	08/16/2023	11:33	1354.8	1363.7	1233.49	1196.47	0.0300137	252.886	2.37	1	1
121	ZY1F_AHSI_W98.47_N29.51_20221013_004183_L1A0000250381	J K Spruce_20221013	J K Spruce	29.3091	-98.3205	ZY1F	20221013	2022-10-13 17:33:02	2022-10-13 17:33:02	TX	CST	2022-10-13 11:33:02	7097	10/13/2022	11:33	1492.3	1495.9	1355.59	1427.42	0.0529872	135.627	5.76	1	1	噪声较大

[truncated: 8 more sheets: 2024.10 (2), 2024.7, 结果统计_0731, 2024.5(0530备份), 2024.4, 2024.4 (2), 2024.2, 补充说明]
